# Supplementary material for: Genome wide host gene expression analysis in mice experimentally infected with Pasteurella multocida
Source: PubMed Central journal article supplement (PMC5509158; doi:10.1371/journal.pone.0179420), 2017-07-13
Supplement: pone.0179420.s010.pdf [file pone.0179420.s010.pdf]

**Mice\_onset\_spleen\_DE\_genes\_fc****Gene**            **log2 Fold Change**

|         |            |
|---------|------------|
| AAAS    | -1.1081614 |
| AAED1   | -0.6094956 |
| AAGAB   | -0.3715901 |
| AAMDC   | -0.7769148 |
| AARS    | -0.4350281 |
| AARSD1  | -0.4622111 |
| AASS    | -3.2934823 |
| AATF    | -0.4051771 |
| AATK    | -1.5614734 |
| ABAT    | -1.26049   |
| ABCA2   | -0.4896455 |
| ABCA3   | -0.3024902 |
| ABCA7   | -0.5232725 |
| ABCA8A  | -2.4815114 |
| ABCA8B  | -2.5012186 |
| ABCA9   | -3.6531928 |
| ABCB10  | -1.1183777 |
| ABCB4   | -1.3778749 |
| ABCB6   | -1.8042278 |
| ABCB7   | -0.8217959 |
| ABCB8   | -0.4144793 |
| ABCC3   | -2.5026407 |
| ABCC9   | -0.7629452 |
| ABCD1   | -1.0336969 |
| ABCD2   | -2.3271794 |
| ABCD4   | -0.1774926 |
| ABCF2   | -0.2728663 |
| ABCG1   | -0.6242147 |
| ABCG2   | -1.2413669 |
| ABCG3   | -1.4159253 |
| ABCG4   | -1.3622556 |
| ABHD1   | -0.4988551 |
| ABHD10  | -0.4758031 |
| ABHD11  | -0.4339414 |
| ABHD12  | -0.8446856 |
| ABHD14B | -0.7966716 |
| ABHD16A | -0.7772727 |
| ABHD17A | -0.6799817 |
| ABHD4   | -0.9494858 |
| ABHD5   | -0.398056  |
| ABHD6   | -0.3457077 |
| ABHD8   | -0.3427458 |
| ABI3BP  | -0.2848938 |

|        |            |
|--------|------------|
| ABL1   | -0.7585282 |
| ABTB1  | -0.6223116 |
| ACAA2  | -0.7274861 |
| ACACA  | -0.5378742 |
| ACACB  | -1.4677246 |
| ACAD10 | -0.2141581 |
| ACAD12 | -0.4031947 |
| ACADL  | -0.3438821 |
| ACADM  | -0.748848  |
| ACADS  | -1.1947529 |
| ACADVL | -0.4525008 |
| ACAP3  | -0.8508253 |
| ACAT1  | -0.9403515 |
| ACAT3  | -0.5055242 |
| ACBD4  | -0.8625708 |
| ACBD6  | -0.8991246 |
| ACCS   | -0.3137159 |
| ACD    | -0.3716693 |
| ACE    | -1.4714704 |
| ACER3  | -0.3864188 |
| ACHE   | -1.2374642 |
| ACKR1  | -1.894939  |
| ACKR3  | -0.4320736 |
| ACKR4  | -1.4766409 |
| ACLY   | -0.2151856 |
| ACMSD  | -2.0395768 |
| ACNAT2 | -0.3830395 |
| ACO1   | -0.456001  |
| ACO2   | -0.3699088 |
| ACOT1  | -1.1463907 |
| ACOT11 | -0.8038998 |
| ACOT13 | -0.6315985 |
| ACOT2  | -0.3774633 |
| ACOT6  | -0.6699174 |
| ACOT8  | -0.2986774 |
| ACP1   | -0.8378701 |
| ACSF3  | -0.4667978 |
| ACSL1  | -0.7436118 |
| ACSL5  | -0.4621592 |
| ACSL6  | -0.5373285 |
| ACSS1  | -0.7383094 |
| ACSS2  | -1.2841713 |
| ACTL6A | -0.9709673 |
| ACTR10 | -0.3050308 |
| ACTR1A | -0.4805341 |

|          |            |
|----------|------------|
| ACTR8    | -0.6182208 |
| ACVR2B   | -0.8964365 |
| ACVRL1   | -0.4276085 |
| ACY1     | -0.2933691 |
| ACY3     | -2.5495112 |
| ACYP2    | -0.2893617 |
| ADAM10   | -0.9183335 |
| ADAM22   | -1.9708323 |
| ADAM33   | -0.2529903 |
| ADAMDEC1 | -1.1601601 |
| ADAMTS15 | -0.3488071 |
| ADAMTS16 | -1.8044138 |
| ADAMTS3  | -0.1867909 |
| ADAMTSL2 | -0.6154304 |
| ADAMTSL5 | -0.9237418 |
| ADAP2    | -0.9125447 |
| ADCY1    | -2.6824827 |
| ADCY2    | -0.7473187 |
| ADCY3    | -0.5848532 |
| ADCY5    | -0.7965212 |
| ADCY6    | -0.6925588 |
| ADCY7    | -0.3579245 |
| ADCY9    | -1.4262109 |
| ADD1     | -0.7230635 |
| ADD2     | -1.913733  |
| ADD3     | -0.7009502 |
| ADIG     | -0.9150147 |
| ADIPOQ   | -3.6276762 |
| ADIPOR1  | -0.7520094 |
| ADK      | -0.5053282 |
| ADNP2    | -0.2591524 |
| ADORA3   | -0.4536221 |
| ADPRHL2  | -0.2525034 |
| ADRA1D   | -1.6357365 |
| ADRB1    | -1.5901811 |
| ADRB2    | -0.2826214 |
| ADRB3    | -1.3249574 |
| ADSS     | -0.6705833 |
| ADSSL1   | -0.8151374 |
| AEBP1    | -0.2626185 |
| AF251705 | -1.2305107 |
| AFAP1    | -0.6011396 |
| AFAP1L1  | -0.9895561 |
| AFAP1L2  | -1.418262  |
| AFG3L1   | -0.3929634 |

|         |            |
|---------|------------|
| AFG3L2  | -0.5162673 |
| AFMID   | -0.8878346 |
| AGAP1   | -0.5651822 |
| AGBL1   | -2.1525364 |
| AGFG2   | -1.3432646 |
| AGL     | -1.0940442 |
| AGMO    | -1.3120759 |
| AGO1    | -0.4140744 |
| AGO2    | -1.130835  |
| AGO4    | -0.4607551 |
| AGPAT2  | -0.2953219 |
| AGPAT4  | -0.354527  |
| AGPS    | -0.2413077 |
| AGTPBP1 | -0.3210487 |
| AGTR1A  | -0.6857758 |
| AGTRAP  | -0.3514924 |
| AHCTF1  | -0.564899  |
| AHCY    | -0.3403974 |
| AHCYL1  | -0.2942476 |
| AHDC1   | -0.6076565 |
| AHNAK   | -0.370575  |
| AHRR    | -1.5959096 |
| AHSP    | -1.135745  |
| AIF1    | -0.3614397 |
| AIFM1   | -0.282701  |
| AIFM2   | -1.2656503 |
| AIG1    | -0.9814196 |
| AIMP1   | -0.2125034 |
| AIP     | -0.4838681 |
| AK1     | -2.3612928 |
| AK3     | -1.1138129 |
| AK6     | -0.272285  |
| AK8     | -1.1778402 |
| AKAP11  | -0.4242802 |
| AKAP8L  | -0.4439011 |
| AKIP1   | -1.5009398 |
| AKNAD1  | -0.9928169 |
| AKR1A1  | -0.4689627 |
| AKR1B10 | -0.7719789 |
| AKR1B7  | -2.8820393 |
| AKR1B8  | -0.4830198 |
| AKR1C13 | -0.2603102 |
| AKR7A5  | -0.4945459 |
| AKT1    | -0.5149775 |
| AKT1S1  | -0.4202509 |

|          |            |
|----------|------------|
| ALAD     | -1.6866851 |
| ALAS2    | -1.103662  |
| ALCAM    | -0.3536706 |
| ALDH16A1 | -0.2377877 |
| ALDH18A1 | -1.0835614 |
| ALDH1A1  | -0.828629  |
| ALDH1A7  | -0.9344695 |
| ALDH1L1  | -0.8375068 |
| ALDH2    | -0.6488233 |
| ALDH3B1  | -0.6064968 |
| ALDH3B2  | -2.1675475 |
| ALDH4A1  | -0.6205897 |
| ALDH6A1  | -0.4584971 |
| ALDH9A1  | -0.4289813 |
| ALDOC    | -0.4811478 |
| ALG13    | -0.5022059 |
| ALG2     | -0.4446225 |
| ALG5     | -0.2762585 |
| ALG6     | -1.086601  |
| ALG9     | -0.5803804 |
| ALKBH7   | -0.5651383 |
| ALKBH8   | -0.8201089 |
| ALMS1    | -0.5750089 |
| ALOX12   | -1.1308966 |
| ALOX12B  | -0.2712562 |
| ALOX12E  | -3.0897586 |
| ALOX15   | -3.6403115 |
| ALOX5    | -1.2491975 |
| ALOX5AP  | -0.5409083 |
| ALOXE3   | -2.9196155 |
| ALS2CR12 | -0.8403153 |
| ALYREF   | -0.7282052 |
| ALYREF2  | -0.5690789 |
| AMD2     | -0.5768085 |
| AMDHD2   | -0.4061775 |
| AMER1    | -0.2431741 |
| AMMECR1  | -0.5925269 |
| AMOT     | -1.86271   |
| AMPD3    | -1.435956  |
| AMZ1     | -0.9002705 |
| ANAPC1   | -0.2081046 |
| ANAPC10  | -0.8786244 |
| ANAPC15  | -0.569232  |
| ANAPC4   | -0.2767582 |
| ANAPC5   | -0.7775784 |

|          |            |
|----------|------------|
| ANGEL2   | -0.2808962 |
| ANGPT1   | -0.9904516 |
| ANGPTL2  | -2.0759478 |
| ANGPTL6  | -0.8285132 |
| ANGPTL7  | -1.1321316 |
| ANK      | -1.3317056 |
| ANK1     | -1.3060684 |
| ANK3     | -0.6904235 |
| ANKLE1   | -1.3078747 |
| ANKMY2   | -0.7234576 |
| ANKRD13A | -0.812583  |
| ANKRD13B | -0.371192  |
| ANKRD2   | -2.358388  |
| ANKRD24  | -1.558269  |
| ANKRD26  | -0.5122492 |
| ANKRD29  | -0.4700086 |
| ANKRD32  | -0.7100315 |
| ANKRD35  | -0.8470357 |
| ANKRD39  | -0.2416587 |
| ANKRD40  | -0.2692373 |
| ANKRD50  | -1.1190543 |
| ANKRD54  | -0.9159765 |
| ANKRD61  | -0.2865098 |
| ANKRD9   | -1.216249  |
| ANKS1    | -0.3315601 |
| ANLN     | -0.793911  |
| ANO1     | -1.9532299 |
| ANO10    | -0.4288096 |
| ANO6     | -0.2004509 |
| ANP32A   | -0.4884181 |
| ANP32B   | -0.3923764 |
| ANP32E   | -0.3702188 |
| ANTXR1   | -0.9197235 |
| ANXA8    | -0.6550348 |
| ANXA9    | -0.2816327 |
| AOX1     | -2.1087322 |
| AP1AR    | -0.6661587 |
| AP1M1    | -0.306304  |
| AP1S1    | -0.4100051 |
| AP2A1    | -1.3934164 |
| AP2A2    | -1.4049568 |
| AP2B1    | -0.654346  |
| AP2M1    | -0.2617545 |
| AP2S1    | -0.4184389 |
| AP3D1    | -0.1792998 |

|          |            |
|----------|------------|
| AP3S1    | -0.2749567 |
| AP3S2    | -0.3073659 |
| AP4B1    | -0.6682305 |
| AP4M1    | -0.986908  |
| AP5B1    | -0.2051134 |
| APAF1    | -0.2847004 |
| APBA1    | -2.3831398 |
| APC2     | -0.8119464 |
| APCDD1   | -1.7675619 |
| APEH     | -0.8806725 |
| API5     | -0.5179071 |
| APLF     | -0.8377147 |
| APLNR    | -2.4473612 |
| APLP2    | -0.5174551 |
| APMAP    | -0.4898863 |
| APOA1BP  | -0.5447044 |
| APOBR    | -0.4477086 |
| APOC1    | -0.3880048 |
| APOC4    | -1.4455671 |
| APOE     | -0.2471652 |
| APOF     | -2.0774646 |
| APOL10A  | -1.6321363 |
| APOL10B  | -0.7781177 |
| APOL11B  | -1.2274323 |
| APOL8    | -1.8691325 |
| APOO     | -0.6337915 |
| APOOL    | -0.4787669 |
| APPL2    | -1.5748801 |
| APRT     | -0.3047271 |
| AQP1     | -1.5611434 |
| AQP11    | -1.1747606 |
| AQP2     | -0.9345198 |
| AQP9     | -1.5404077 |
| ARAP3    | -0.2753544 |
| ARF2     | -0.473156  |
| ARF5     | -0.9124551 |
| ARF6     | -0.6400642 |
| ARFGAP3  | -0.3915458 |
| ARGLU1   | -0.2935934 |
| ARHGAP10 | -1.623204  |
| ARHGAP12 | -0.9662595 |
| ARHGAP15 | -0.2955508 |
| ARHGAP18 | -1.73283   |
| ARHGAP19 | -0.6093874 |
| ARHGAP20 | -1.0522473 |

|           |            |
|-----------|------------|
| ARHGAP21  | -0.5143876 |
| ARHGAP23  | -0.9385719 |
| ARHGAP33  | -2.0145848 |
| ARHGAP39  | -0.8987794 |
| ARHGAP44  | -1.2672029 |
| ARHGAP5   | -0.4931536 |
| ARHGAP6   | -0.7979732 |
| ARHGAP9   | -0.3975468 |
| ARHGEF1   | -0.2433715 |
| ARHGEF10L | -0.3081527 |
| ARHGEF12  | -0.6800962 |
| ARHGEF17  | -0.7993956 |
| ARHGEF2   | -0.1935911 |
| ARHGEF25  | -0.7352428 |
| ARHGEF39  | -0.9339542 |
| ARHGEF4   | -0.9461815 |
| ARHGEF40  | -1.2967134 |
| ARHGEF9   | -1.8468416 |
| ARID4A    | -0.5321965 |
| ARL11     | -3.21238   |
| ARL2      | -0.3658423 |
| ARL2BP    | -0.3962064 |
| ARL4A     | -1.1896315 |
| ARL4D     | -1.0081918 |
| ARL6      | -0.4362187 |
| ARL6IP4   | -0.3863802 |
| ARL6IP5   | -0.4338293 |
| ARMC1     | -0.5021739 |
| ARMC10    | -0.3769984 |
| ARMC2     | -1.5569332 |
| ARMC3     | -0.2451773 |
| ARMC5     | -0.311152  |
| ARMC6     | -0.5483198 |
| ARMC7     | -0.5056877 |
| ARMC9     | -1.2387071 |
| ARMCX1    | -0.8836446 |
| ARMCX5    | -0.3919096 |
| ARNT      | -0.2201877 |
| ARNT2     | -1.5268283 |
| ARPC1A    | -0.7073216 |
| ARPC4     | -0.4957585 |
| ARRB1     | -1.3179111 |
| ARRB2     | -0.7031331 |
| ARRDC2    | -0.9036112 |
| ARSB      | -0.7602854 |



|        |            |
|--------|------------|
| ARSG   | -0.550868  |
| ARSI   | -1.2343285 |
| ARSK   | -0.7710412 |
| ART3   | -0.9749987 |
| ART4   | -1.1280556 |
| ART5   | -0.7042174 |
| ARTN   | -0.9627492 |
| AS3MT  | -0.6114125 |
| ASAH1  | -1.0456109 |
| ASAP1  | -0.6626859 |
| ASB1   | -1.1382866 |
| ASB16  | -1.6822917 |
| ASB17  | -2.0408084 |
| ASB2   | -0.7195158 |
| ASB6   | -0.6223397 |
| ASCC1  | -0.6557384 |
| ASF1A  | -0.5514083 |
| ASF1B  | -1.0834951 |
| ASGR2  | -1.1318142 |
| ASH2L  | -0.3008962 |
| ASL    | -0.5217385 |
| ASNS   | -0.2633176 |
| ASNSD1 | -0.3283567 |
| ASPA   | -2.6142569 |
| ASPH   | -1.0630894 |
| ASPM   | -1.1457558 |
| ASRGL1 | -0.7385128 |
| ATAD2  | -0.4710236 |
| ATAD5  | -0.9117003 |
| ATE1   | -0.2386251 |
| ATF1   | -0.6529594 |
| ATF2   | -0.2892952 |
| ATF6B  | -0.3526697 |
| ATG10  | -0.4896462 |
| ATG101 | -0.2490206 |
| ATG12  | -0.1934166 |
| ATG14  | -0.2710862 |
| ATG2A  | -0.770463  |
| ATG4B  | -1.1003895 |
| ATG4C  | -1.0032613 |
| ATG4D  | -0.7006693 |
| ATG7   | -0.6147528 |
| ATG9A  | -0.3494921 |
| ATL1   | -0.8186243 |
| ATL2   | -0.4782047 |

|           |            |
|-----------|------------|
| ATOH8     | -1.3760941 |
| ATP11B    | -0.6503768 |
| ATP13A2   | -0.8835845 |
| ATP1A1    | -0.536571  |
| ATP1A2    | -1.9479728 |
| ATP1A3    | -1.5698354 |
| ATP1B2    | -2.0785599 |
| ATP2A3    | -0.6314697 |
| ATP2B4    | -1.127881  |
| ATP5B     | -0.2932582 |
| ATP5C1    | -0.4121561 |
| ATP5C1-PS | -0.4537711 |
| ATP5D     | -0.739717  |
| ATP5E     | -0.3513866 |
| ATP5F1    | -0.4229431 |
| ATP5G2    | -0.2143564 |
| ATP5H     | -0.3028603 |
| ATP5J     | -0.3722701 |
| ATP5J2    | -0.4344559 |
| ATP5K     | -0.5426803 |
| ATP5L     | -0.3290534 |
| ATP5O     | -0.570024  |
| ATP5S     | -1.0155463 |
| ATP6      | -0.2932868 |
| ATP6AP1   | -0.2779985 |
| ATP6AP2   | -0.2765546 |
| ATP6V0A1  | -1.0254803 |
| ATP6V0B   | -0.6032267 |
| ATP6V0C   | -0.4320879 |
| ATP6V0D1  | -0.4554339 |
| ATP6V0D2  | -1.5550904 |
| ATP6V0E2  | -0.6400986 |
| ATP6V1E1  | -0.5227752 |
| ATP7B     | -1.3978078 |
| ATP8A2    | -0.4818656 |
| ATPAF2    | -0.4269557 |
| ATPIF1    | -0.892725  |
| ATRAID    | -0.6806927 |
| ATRIP     | -0.3048935 |
| ATRX      | -0.4166498 |
| ATXN1     | -0.4042013 |
| ATXN7L3   | -0.181562  |
| ATXN7L3B  | -0.2165437 |
| AUH       | -0.440412  |
| AUP1      | -0.4866505 |

|             |            |
|-------------|------------|
| AURKA       | -0.8131867 |
| AUTS2       | -0.4778378 |
| AWAT1       | -0.3062232 |
| AWAT2       | -0.5459259 |
| AXIN1       | -0.2778893 |
| AXL         | -0.915123  |
| B3GALNT2    | -0.4428372 |
| B3GALT1     | -0.1946011 |
| B3GAT3      | -0.4913688 |
| B3GLCT      | -0.4508891 |
| B3GNT1      | -0.6768947 |
| B3GNT8      | -1.651824  |
| B3GNT9      | -1.0296144 |
| B4GALNT2    | -0.4042077 |
| B4GALT1     | -0.5339975 |
| B4GALT2     | -0.8134465 |
| B4GALT4     | -1.4300063 |
| B4GALT6     | -0.7181349 |
| B630019K06I | -0.8519642 |
| B9D1        | -0.7304428 |
| B9D2        | -0.1874332 |
| BACE1       | -1.0034175 |
| BAD         | -0.7057958 |
| BAG1        | -0.7677956 |
| BAG2        | -1.3382573 |
| BAG4        | -0.5069206 |
| BAG6        | -0.5864768 |
| BAHD1       | -0.3768687 |
| BAI1        | -1.1068649 |
| BAI2        | -2.1029873 |
| BAK1        | -0.7195692 |
| BANF1       | -0.8292995 |
| BAP1        | -0.6371164 |
| BARD1       | -0.7721858 |
| BAZ1B       | -0.229743  |
| BAZ2A       | -0.8434014 |
| BBIP1       | -0.416589  |
| BBS1        | -1.0508342 |
| BBS10       | -0.3633485 |
| BBS4        | -0.356688  |
| BBS5        | -0.3663497 |
| BBS7        | -1.1093931 |
| BBS9        | -0.4862785 |
| BCAM        | -1.2268009 |
| BCAP29      | -0.575099  |

|         |            |
|---------|------------|
| BCAR1   | -0.4463153 |
| BCAS2   | -0.5855489 |
| BCAS3   | -0.6269133 |
| BCAT2   | -0.6985965 |
| BCCIP   | -0.2429895 |
| BCKDHA  | -1.1835871 |
| BCKDK   | -1.2758007 |
| BCL11A  | -0.3077025 |
| BCL2L1  | -0.6241565 |
| BCL2L12 | -0.5859399 |
| BCL2L13 | -0.3204336 |
| BCL2L2  | -0.7630665 |
| BCL7A   | -0.3006854 |
| BCL7B   | -0.2588463 |
| BCL7C   | -0.6025224 |
| BCL9L   | -0.7750812 |
| BCO2    | -0.8364234 |
| BCORL1  | -0.6476615 |
| BDH1    | -0.2362089 |
| BDH2    | -0.3025158 |
| BECN1   | -0.7116451 |
| BEND5   | -0.1810722 |
| BEND7   | -0.6908364 |
| BET1    | -0.4846263 |
| BEX4    | -0.9968405 |
| BGN     | -0.4232025 |
| BICC1   | -0.410224  |
| BICD1   | -1.0914147 |
| BIK     | -1.3528528 |
| BIN2    | -0.5253601 |
| BIN3    | -0.4089379 |
| BIRC5   | -0.9618778 |
| BIVM    | -0.6548729 |
| BLCAP   | -0.5062337 |
| BLM     | -1.3135214 |
| BLOC1S3 | -0.5766203 |
| BLOC1S5 | -1.0033555 |
| BLVRA   | -0.9767003 |
| BLVRB   | -1.2776384 |
| BMF     | -0.6535883 |
| BMP2    | -0.9741015 |
| BMP4    | -1.4660149 |
| BMP8B   | -1.0392172 |
| BMPR2   | -0.4436703 |
| BMX     | -1.0603056 |

|         |            |
|---------|------------|
| BMYC    | -0.4159651 |
| BNC1    | -1.4884205 |
| BNIP1   | -0.5737977 |
| BNIP3L  | -0.8704991 |
| BOLA1   | -0.2859459 |
| BOLA3   | -0.8345661 |
| BORA    | -1.0282738 |
| BPGM    | -0.4118862 |
| BPHL    | -0.7501702 |
| BPIFA6  | -0.5730598 |
| BRAP    | -0.2529426 |
| BRCA1   | -1.1001823 |
| BRCA2   | -1.1441307 |
| BRD3    | -0.5726714 |
| BRD7    | -0.1847115 |
| BRD9    | -0.2234101 |
| BRE     | -0.3176847 |
| BRF1    | -0.5879312 |
| BRF2    | -0.5000889 |
| BRINP2  | -0.7391353 |
| BRIP1   | -0.6740806 |
| BRK1    | -0.5278931 |
| BRMS1   | -0.383894  |
| BRMS1L  | -0.2502942 |
| BRPF3   | -0.8233557 |
| BSCL2   | -0.7612505 |
| BSDC1   | -0.9186053 |
| BSG     | -1.1615944 |
| BSPH1   | -0.3238599 |
| BTAF1   | -0.6159682 |
| BTBD2   | -0.9425545 |
| BTBD6   | -0.5812535 |
| BTD     | -0.8770633 |
| BTF3    | -0.254046  |
| BTG2    | -0.7994762 |
| BTNL10  | -0.6356196 |
| BTNL2   | -0.714356  |
| BTNL9   | -0.6544013 |
| BTRC    | -1.1070211 |
| BUB1    | -0.8573804 |
| BUB1B   | -1.2982125 |
| BUB3    | -0.5232024 |
| BVES    | -1.2848761 |
| BYSL    | -0.3398509 |
| C1GALT1 | -0.4501662 |

|          |            |
|----------|------------|
| C1QA     | -0.6348519 |
| C1QB     | -0.4179535 |
| C1QC     | -0.861268  |
| C1QTNF2  | -1.768409  |
| C1QTNF4  | -1.4835019 |
| C1QTNF5  | -1.774513  |
| C1QTNF6  | -0.9593585 |
| C1QTNF7  | -1.5321617 |
| C1RL     | -0.3760259 |
| C1S1     | -0.3424616 |
| C2CD2L   | -0.5765224 |
| C2CD3    | -0.5148277 |
| C2CD4C   | -0.7063441 |
| C2CD4D   | -0.3827984 |
| C3AR1    | -1.8699608 |
| C5AR2    | -1.2629962 |
| C6       | -1.3031902 |
| C8G      | -0.7330873 |
| CAAP1    | -0.6759892 |
| CABIN1   | -0.9144011 |
| CABLES2  | -0.3988862 |
| CABYR    | -0.5547359 |
| CACHD1   | -0.8637748 |
| CACNA1G  | -1.5593786 |
| CACNG7   | -0.2595236 |
| CACTIN   | -0.6014481 |
| CADM1    | -0.7703366 |
| CADM3    | -0.8171952 |
| CADM4    | -0.5547323 |
| CADPS2   | -0.4537725 |
| CAGE1    | -0.5655103 |
| CALCOCO1 | -0.867213  |
| CALM2    | -0.5856361 |
| CALM3    | -0.9322233 |
| CALM4    | -1.0024478 |
| CALML4   | -2.10292   |
| CALR3    | -0.5937843 |
| CAMK1    | -0.8922842 |
| CAMK1D   | -0.8138809 |
| CAMK1G   | -1.7908874 |
| CAMK2G   | -0.3001909 |
| CAMKMT   | -0.4295993 |
| CAMP     | -0.8864594 |
| CAMSAP2  | -1.042028  |
| CAMSAP3  | -0.3779371 |

|          |            |
|----------|------------|
| CAP2     | -1.8056417 |
| CAPN1    | -0.6911006 |
| CAPN10   | -0.3813834 |
| CAPN3    | -0.7754543 |
| CAPN5    | -0.8138633 |
| CAPN9    | -0.9536369 |
| CAPNS1   | -0.4553461 |
| CAPRIN2  | -0.333765  |
| CAPZB    | -0.4749694 |
| CAR1     | -1.7250752 |
| CAR2     | -1.3727126 |
| CAR3     | -4.161031  |
| CAR4     | -0.7420273 |
| CAR7     | -0.858911  |
| CAR9     | -0.6870406 |
| CARD10   | -1.0356302 |
| CARD9    | -1.9641693 |
| CARF     | -0.9003954 |
| CARHSP1  | -1.0782261 |
| CARKD    | -0.2956252 |
| CARM1    | -0.7408805 |
| CASC5    | -1.0162976 |
| CASKIN2  | -1.2255149 |
| CASP12   | -0.9197407 |
| CASP14   | -0.6286507 |
| CASP2    | -0.3306775 |
| CASP3    | -0.5603166 |
| CASP6    | -0.8670349 |
| CASP7    | -0.3554444 |
| CASP8AP2 | -0.5033097 |
| CASP9    | -0.5463433 |
| CASQ2    | -1.4818094 |
| CAST     | -0.6384435 |
| CAT      | -0.9344244 |
| CAV1     | -2.6803029 |
| CAV2     | -2.9423776 |
| CBFA2T3  | -0.8147435 |
| CBR1     | -0.6172643 |
| CBR2     | -3.6499052 |
| CBR3     | -1.9289618 |
| CBR4     | -0.278554  |
| CBX2     | -0.8434174 |
| CBX3     | -0.4710484 |
| CBX5     | -0.5902572 |
| CBX6     | -1.1299    |

|          |            |
|----------|------------|
| CBY1     | -1.2068124 |
| CC2D2A   | -1.2047503 |
| CCAR2    | -0.6633267 |
| CCBL1    | -0.3809404 |
| CCDC103  | -1.336252  |
| CCDC104  | -0.6980162 |
| CCDC106  | -0.7117145 |
| CCDC12   | -0.382864  |
| CCDC124  | -0.3759866 |
| CCDC125  | -0.6313155 |
| CCDC127  | -0.3420501 |
| CCDC132  | -0.2898512 |
| CCDC136  | -1.3512459 |
| CCDC138  | -0.2313938 |
| CCDC144B | -0.2481377 |
| CCDC150  | -0.5744455 |
| CCDC151  | -0.3948658 |
| CCDC157  | -0.6654685 |
| CCDC159  | -0.6097534 |
| CCDC167  | -0.7165637 |
| CCDC18   | -0.8678491 |
| CCDC181  | -0.4296541 |
| CCDC19   | -1.4373708 |
| CCDC22   | -0.2598414 |
| CCDC23   | -0.2986231 |
| CCDC28B  | -1.0061736 |
| CCDC34   | -1.0456054 |
| CCDC39   | -0.7230053 |
| CCDC51   | -0.355803  |
| CCDC57   | -0.4032764 |
| CCDC6    | -0.3414416 |
| CCDC61   | -0.5435286 |
| CCDC67   | -1.363466  |
| CCDC68   | -0.6735289 |
| CCDC71   | -0.3119416 |
| CCDC74A  | -1.713212  |
| CCDC77   | -0.5055084 |
| CCDC8    | -1.1515367 |
| CCDC80   | -1.9333076 |
| CCDC88C  | -0.1793118 |
| CCDC89   | -0.6225128 |
| CCDC97   | -0.3496647 |
| CCHCR1   | -1.059413  |
| CCIN     | -0.2511854 |
| CCL24    | -1.7360933 |



|          |            |
|----------|------------|
| CCL6     | -2.754838  |
| CCL8     | -1.6837754 |
| CCL9     | -0.6578264 |
| CCNA2    | -1.510808  |
| CCNB1    | -1.4172521 |
| CCNB1IP1 | -1.3885128 |
| CCNB2    | -1.2311406 |
| CCND3    | -0.964263  |
| CCNDBP1  | -0.5959668 |
| CCNE1    | -2.164557  |
| CCNF     | -0.9550395 |
| CCNG1    | -0.4415159 |
| CCNI     | -0.1933327 |
| CCNO     | -1.0895019 |
| CCP110   | -1.1492286 |
| CCPG1    | -0.7973542 |
| CCR2     | -1.5582216 |
| CCR3     | -3.74362   |
| CCR5     | -0.1719422 |
| CCRN4L   | -0.507968  |
| CCS      | -0.5504694 |
| CCSAP    | -0.4092808 |
| CCT6A    | -0.1909123 |
| CCT7     | -0.220892  |
| CCZ1     | -0.4737001 |
| CD101    | -0.8184285 |
| CD109    | -1.36007   |
| CD151    | -0.7765188 |
| CD160    | -0.9022725 |
| CD163    | -2.9596457 |
| CD177    | -0.5443554 |
| CD180    | -0.9568222 |
| CD1D1    | -0.3086872 |
| CD1D2    | -0.4803686 |
| CD200R1  | -1.7813354 |
| CD200R4  | -2.201659  |
| CD207    | -0.6364324 |
| CD209A   | -1.659312  |
| CD209B   | -0.7767608 |
| CD209F   | -2.3310633 |
| CD226    | -0.3062038 |
| CD248    | -2.6208367 |
| CD24A    | -1.7096124 |
| CD2AP    | -0.6494012 |
| CD300C   | -0.9164679 |

|          |            |
|----------|------------|
| CD300E   | -1.2943163 |
| CD300LB  | -3.6542838 |
| CD300LD  | -1.7888706 |
| CD300LG  | -0.7064266 |
| CD300LH  | -0.972584  |
| CD36     | -0.5161963 |
| CD37     | -0.2270284 |
| CD47     | -0.4434228 |
| CD59A    | -2.2647057 |
| CD59B    | -1.9471898 |
| CD5L     | -0.6580434 |
| CD68     | -0.8042135 |
| CD7      | -1.1877966 |
| CD79B    | -0.2341781 |
| CD80     | -0.3765621 |
| CD82     | -0.4107199 |
| CD84     | -0.7591467 |
| CD8B1    | -0.3145351 |
| CD9      | -0.4981809 |
| CD93     | -0.3880115 |
| CD99L2   | -1.7290835 |
| CDADC1   | -0.4115152 |
| CDAN1    | -0.5683649 |
| CDC20    | -1.1169362 |
| CDC25A   | -0.6082506 |
| CDC25B   | -1.640564  |
| CDC25C   | -1.0735569 |
| CDC26    | -0.5451369 |
| CDC27    | -0.4131146 |
| CDC34    | -0.3438311 |
| CDC42BPA | -0.8694897 |
| CDC42EP1 | -1.025537  |
| CDC42EP3 | -0.8050203 |
| CDC42EP4 | -0.7952128 |
| CDC42EP5 | -1.2107348 |
| CDC45    | -0.3978434 |
| CDC6     | -1.1970496 |
| CDC73    | -0.2974725 |
| CDCA2    | -1.1137595 |
| CDCA3    | -0.9869852 |
| CDCA4    | -1.0781622 |
| CDCA5    | -0.7029481 |
| CDCA7    | -0.5744128 |
| CDCA7L   | -0.4356425 |
| CDCA8    | -1.0884681 |

|            |            |
|------------|------------|
| CDH1       | -0.3236475 |
| CDH11      | -0.8857856 |
| CDH18      | -1.221142  |
| CDHR3      | -0.5055134 |
| CDK1       | -1.1913991 |
| CDK13      | -0.2964749 |
| CDK14      | -0.4388681 |
| CDK16      | -0.9143515 |
| CDK19      | -0.3589726 |
| CDK2       | -0.8172603 |
| CDK20      | -0.7867024 |
| CDK2AP1    | -0.6071448 |
| CDK4       | -0.4745464 |
| CDK5RAP3   | -0.2739916 |
| CDK6       | -1.1422563 |
| CDK8       | -0.3461766 |
| CDK9       | -0.2066197 |
| CDKN1C     | -1.6223617 |
| CDKN2A     | -1.162818  |
| CDKN2AIPNL | -0.3073278 |
| CDKN2C     | -1.7573695 |
| CDKN2D     | -0.4010539 |
| CDKN3      | -1.1123548 |
| CDO1       | -0.7019994 |
| CDON       | -0.485621  |
| CDPF1      | -0.3681002 |
| CDR2       | -1.3468642 |
| CDR2L      | -0.3872075 |
| CDS1       | -1.3848753 |
| CDS2       | -0.3114719 |
| CDT1       | -0.7555709 |
| CDYL       | -0.852067  |
| CEACAM10   | -0.6797862 |
| CEACAM2    | -1.0015907 |
| CEACAM20   | -0.3142397 |
| CEBPA      | -0.7146339 |
| CEBPE      | -2.3130727 |
| CEBPZOS    | -0.4978781 |
| CECR2      | -0.2508867 |
| CELF4      | -0.9270618 |
| CENPA      | -1.2836766 |
| CENPC1     | -0.5192833 |
| CENPE      | -0.431252  |
| CENPF      | -0.9884424 |
| CENPH      | -2.0518293 |

|         |            |
|---------|------------|
| CENPI   | -0.6127009 |
| CENPK   | -1.2139106 |
| CENPL   | -1.1590528 |
| CENPM   | -1.081234  |
| CENPN   | -0.980825  |
| CENPO   | -0.5928025 |
| CENPP   | -1.2519779 |
| CENPQ   | -0.3269348 |
| CENPT   | -0.9316015 |
| CENPU   | -1.2082846 |
| CENPV   | -0.7020273 |
| CENPW   | -1.1206985 |
| CEP104  | -0.5787239 |
| CEP120  | -0.5835853 |
| CEP128  | -1.0520184 |
| CEP131  | -1.0569181 |
| CEP152  | -0.641005  |
| CEP164  | -0.7231808 |
| CEP19   | -0.28442   |
| CEP192  | -0.4995685 |
| CEP250  | -0.9387875 |
| CEP290  | -0.9005377 |
| CEP41   | -0.204901  |
| CEP44   | -0.8699272 |
| CEP55   | -0.331192  |
| CEP57L1 | -0.5722604 |
| CEP70   | -0.8178625 |
| CEP72   | -1.6539319 |
| CEP76   | -1.1861134 |
| CEP89   | -0.807199  |
| CEP97   | -0.2692506 |
| CERCAM  | -1.4610171 |
| CERS2   | -0.616426  |
| CES1D   | -3.179136  |
| CES2E   | -1.1565769 |
| CES2G   | -1.6524382 |
| CETN3   | -0.6176858 |
| CETN4   | -0.2420158 |
| CFD     | -2.3709626 |
| CFH     | -0.7047529 |
| CFP     | -0.4297948 |
| CGN     | -0.9938698 |
| CGRRF1  | -0.8504906 |
| CHAC2   | -1.2412581 |
| CHAF1A  | -1.1688557 |

|         |            |
|---------|------------|
| CHAF1B  | -1.3928509 |
| CHCHD10 | -0.5200329 |
| CHCHD6  | -0.5166531 |
| CHCHD7  | -0.4144764 |
| CHD1L   | -0.5716672 |
| CHD3OS  | -0.4770412 |
| CHDH    | -0.7209888 |
| CHEK2   | -0.9151006 |
| CHFR    | -0.4281416 |
| CHIL3   | -1.8385458 |
| CHIL4   | -2.1375403 |
| CHIT1   | -2.5449748 |
| CHKB    | -0.3921456 |
| CHMP1A  | -0.3057718 |
| CHMP1B  | -0.3406177 |
| CHMP2A  | -0.3898625 |
| CHMP4B  | -1.1582961 |
| CHMP6   | -0.4190412 |
| CHN1    | -0.6251495 |
| CHN2    | -0.702915  |
| CHP2    | -2.458742  |
| CHPF2   | -0.3283477 |
| CHPT1   | -1.0099132 |
| CHRAC1  | -0.3870044 |
| CHRD1   | -0.2996194 |
| CHRN1   | -0.5951991 |
| CHRN2   | -0.9975781 |
| CHST1   | -0.7946229 |
| CHST12  | -1.5658793 |
| CHST13  | -1.356669  |
| CHST14  | -0.2894554 |
| CHST2   | -1.0541131 |
| CHSY3   | -1.3007364 |
| CHTF18  | -1.3238921 |
| CHTF8   | -0.9365635 |
| CHURC1  | -0.6929359 |
| CIAO1   | -0.6081519 |
| CIAPIN1 | -0.6180506 |
| CIB1    | -0.6318779 |
| CIB2    | -0.3305311 |
| CIDEA   | -2.1356182 |
| CIDEC   | -3.8507576 |
| CIITA   | -2.7675788 |
| CILP    | -0.5299265 |
| CINP    | -0.4149499 |

|         |            |
|---------|------------|
| CIRBP   | -1.3802762 |
| CISD1   | -0.5355802 |
| CISD2   | -0.477901  |
| CIT     | -1.6001368 |
| CITED4  | -1.6130996 |
| CKAP2   | -1.1436505 |
| CKAP2L  | -0.677805  |
| CKAP5   | -0.4956532 |
| CKB     | -1.8483772 |
| CKS1B   | -1.006876  |
| CKS1BRT | -1.0391316 |
| CKS2    | -0.6390457 |
| CLCN2   | -1.5781136 |
| CLCN3   | -0.8177433 |
| CLCN7   | -0.4110208 |
| CLDN10  | -0.2424731 |
| CLDN13  | -1.6591158 |
| CLDN15  | -1.4750693 |
| CLDN20  | -1.1704156 |
| CLDN5   | -1.2747731 |
| CLEC10A | -0.7440944 |
| CLEC11A | -1.2787216 |
| CLEC14A | -2.832456  |
| CLEC1A  | -1.5593348 |
| CLEC1B  | -1.0482311 |
| CLEC4A3 | -0.8444238 |
| CLEC4A4 | -0.5598254 |
| CLEC4B2 | -1.2973397 |
| CLEC4G  | -0.8918204 |
| CLEC7A  | -1.2035675 |
| CLEC9A  | -1.027461  |
| CLHC1   | -0.7679915 |
| CLIC3   | -0.6911559 |
| CLIC5   | -1.7865834 |
| CLIP3   | -1.6443608 |
| CLK3    | -0.5333018 |
| CLMN    | -0.8899393 |
| CLN6    | -1.480813  |
| CLN8    | -1.0356293 |
| CLP1    | -0.6628141 |
| CLPB    | -0.4317203 |
| CLPP    | -0.3292718 |
| CLPTM1  | -0.4730482 |
| CLPX    | -0.7861977 |
| CLSPN   | -1.565419  |

|         |            |
|---------|------------|
| CLSTN1  | -0.3440568 |
| CLTC    | -0.6182399 |
| CLYBL   | -1.4707494 |
| CMAS    | -0.6486707 |
| CMBL    | -2.6438756 |
| CMC1    | -0.6462898 |
| CMC2    | -0.7753091 |
| CML5    | -2.0290751 |
| CMPK1   | -0.2030172 |
| CMSS1   | -0.5039988 |
| CMTM3   | -0.2710342 |
| CMTM4   | -1.888732  |
| CMTM5   | -0.5849388 |
| CMTM7   | -0.9002962 |
| CMTM8   | -1.7025783 |
| CNGB1   | -0.3944819 |
| CNNM1   | -0.7798858 |
| CNNM2   | -0.9480968 |
| CNOT10  | -0.5550013 |
| CNOT3   | -0.7538574 |
| CNOT7   | -0.5857682 |
| CNP     | -0.4084835 |
| CNPPD1  | -0.3325863 |
| CNPY2   | -0.3288937 |
| CNPY4   | -0.643611  |
| CNR1    | -1.067682  |
| CNTF    | -0.3415747 |
| CNTFR   | -1.769594  |
| CNTLN   | -1.0837321 |
| CNTN2   | -0.2499764 |
| CNTROB  | -0.6876559 |
| COA3    | -0.4128556 |
| COA5    | -0.3367386 |
| COA6    | -0.2571316 |
| COASY   | -0.2592487 |
| COCH    | -0.2786117 |
| COG1    | -0.2634082 |
| COG2    | -0.4457979 |
| COG4    | -0.2104178 |
| COL14A1 | -1.2360377 |
| COL15A1 | -1.7165723 |
| COL16A1 | -0.8005471 |
| COL1A1  | -1.3684726 |
| COL1A2  | -1.0962982 |
| COL26A1 | -2.1841052 |

|         |            |
|---------|------------|
| COL27A1 | -0.8780053 |
| COL3A1  | -1.9443545 |
| COL5A1  | -1.3350801 |
| COL5A2  | -1.566397  |
| COL5A3  | -1.1423731 |
| COL6A1  | -1.3137646 |
| COL6A2  | -1.4176712 |
| COL6A3  | -0.577693  |
| COL8A2  | -2.056383  |
| COLEC11 | -2.3203325 |
| COMMD1  | -0.817039  |
| COMMD10 | -0.7299197 |
| COMMD2  | -0.2787581 |
| COMMD3  | -0.6437511 |
| COMMD5  | -0.5629363 |
| COMMD8  | -0.4582958 |
| COMMD9  | -0.4842658 |
| COMP    | -0.3631825 |
| COMT    | -0.9453673 |
| COPE    | -0.2864356 |
| COPG1   | -0.6704271 |
| COPG2   | -0.8626323 |
| COPS2   | -0.318562  |
| COPS3   | -0.5607619 |
| COPS5   | -0.3997932 |
| COPS6   | -0.3689981 |
| COPZ1   | -0.5905871 |
| COPZ2   | -1.0360444 |
| COQ10A  | -0.4109974 |
| COQ4    | -0.4123035 |
| COQ5    | -0.5496063 |
| COQ7    | -0.7543578 |
| COQ9    | -0.7273259 |
| CORO1C  | -0.5216823 |
| CORO2A  | -0.2650337 |
| CORO2B  | -0.9165788 |
| COX11   | -0.501791  |
| COX20   | -0.2516832 |
| COX6A1  | -0.2533488 |
| COX6A2  | -1.0025568 |
| COX6B2  | -2.1628442 |
| COX7B   | -0.2724934 |
| COX7C   | -0.2571526 |
| COX8A   | -0.4271436 |
| COX8B   | -2.0112965 |



|          |            |
|----------|------------|
| CPA3     | -0.708236  |
| CPA6     | -0.8717513 |
| CPE      | -0.9517551 |
| CPEB4    | -0.9924798 |
| CPED1    | -1.0152156 |
| CPM      | -0.5519071 |
| CPNE2    | -1.2227674 |
| CPOX     | -1.0871115 |
| CPPED1   | -0.3937316 |
| CPQ      | -0.5367651 |
| CPSF1    | -0.4457202 |
| CPSF3    | -0.2513347 |
| CPSF3L   | -0.2614484 |
| CPSF4    | -0.6080713 |
| CPT1A    | -0.313087  |
| CPT1B    | -0.3514361 |
| CPT1C    | -1.464375  |
| CPT2     | -0.4713721 |
| CPXM1    | -0.2512693 |
| CPXM2    | -0.329494  |
| CPZ      | -1.6297183 |
| CRABP2   | -0.2414546 |
| CRADD    | -0.3025322 |
| CRAMP1L  | -0.2744279 |
| CRAT     | -1.1589143 |
| CRB2     | -1.5383253 |
| CRCP     | -0.2936106 |
| CREB5    | -0.2494063 |
| CREG1    | -0.9234858 |
| CRELD1   | -0.424818  |
| CRHR1    | -1.3674569 |
| CRIP1    | -0.3819909 |
| CRIP2    | -1.8219523 |
| CRISP3   | -1.4680657 |
| CRISPLD1 | -4.486553  |
| CRKL     | -0.2036185 |
| CRLF1    | -1.1401155 |
| CRMP1    | -1.1803651 |
| CROCC    | -0.3611932 |
| CROT     | -0.6317716 |
| CRTAP    | -0.303277  |
| CRTC1    | -0.5506854 |
| CRTC3    | -0.2327399 |
| CRXOS    | -0.5838075 |
| CRYAB    | -0.7429128 |

|            |            |
|------------|------------|
| CRYBA4     | -0.6840785 |
| CRYBB1     | -1.2868047 |
| CRYBG3     | -0.4080932 |
| CRYL1      | -1.2234197 |
| CRYM       | -0.7997844 |
| CRYZ       | -0.8806863 |
| CRYZL1     | -0.4174657 |
| CS         | -0.4380722 |
| CSDC2      | -3.1962707 |
| CSE1L      | -0.3597937 |
| CSF1R      | -0.7668219 |
| CSGALNACT1 | -1.497817  |
| CSGALNACT2 | -1.0769424 |
| CSL        | -0.6006446 |
| CSNK1E     | -0.2063351 |
| CSNK1G2    | -0.634757  |
| CSNK2B     | -0.3547936 |
| CSPG4      | -1.4604712 |
| CSPG5      | -1.5321212 |
| CSPP1      | -0.2345552 |
| CSRP2      | -0.4136114 |
| CSRP3      | -2.2619786 |
| CST6       | -1.8787818 |
| CSTF1      | -0.2078843 |
| CSTF2      | -0.2227116 |
| CTBP1      | -0.6265378 |
| CTC1       | -0.2742457 |
| CTDP1      | -0.2680206 |
| CTDSP2     | -0.749727  |
| CTDSPL     | -0.5887833 |
| CTIF       | -0.6299405 |
| CTNNBIP1   | -1.1815252 |
| CTNND2     | -1.7289164 |
| CTNS       | -0.8194604 |
| CTR9       | -0.5880041 |
| CTSD       | -0.6613331 |
| CTSE       | -1.1850309 |
| CTSF       | -1.8113666 |
| CTSG       | -0.5925131 |
| CTSH       | -1.0122728 |
| CTSK       | -0.9577673 |
| CTTN       | -0.299602  |
| CTTNBP2    | -1.0638576 |
| CTXN1      | -0.7942758 |
| CUEDC1     | -1.369987  |

|            |            |
|------------|------------|
| CUEDC2     | -0.8231473 |
| CUL1       | -0.7181978 |
| CUL3       | -0.7797976 |
| CUL4A      | -0.9168267 |
| CUL5       | -0.3486829 |
| CUL7       | -0.2890286 |
| CUL9       | -0.3516493 |
| CUTA       | -0.7884412 |
| CUTC       | -0.6207171 |
| CUX1       | -0.8045511 |
| CX3CR1     | -1.816994  |
| CXADR      | -1.9098547 |
| CXX1B      | -0.9329925 |
| CXX1C      | -1.0300298 |
| CXXC1      | -0.2295618 |
| CXXC5      | -1.223443  |
| CYB5A      | -0.6582508 |
| CYB5D2     | -0.611733  |
| CYB5R1     | -1.0211663 |
| CYB5R3     | -0.6740699 |
| CYC1       | -0.4192948 |
| CYHR1      | -0.9992447 |
| CYP19A1    | -0.6028795 |
| CYP21A1    | -2.052679  |
| CYP26C1    | -0.8297606 |
| CYP27A1    | -2.222223  |
| CYP2B10    | -0.5423884 |
| CYP2D11    | -0.8776717 |
| CYP2E1     | -2.0354881 |
| CYP2J8     | -1.1513767 |
| CYP2J9     | -2.1010954 |
| CYP2S1     | -1.5717075 |
| CYP4B1     | -0.9747391 |
| CYP4B1-PS2 | -0.9520278 |
| CYP4F14    | -1.556798  |
| CYP4F18    | -1.0179334 |
| CYP51      | -0.6665809 |
| CYSLTR1    | -0.9859538 |
| CYTH3      | -0.3763504 |
| CYTL1      | -1.663476  |
| DAAM1      | -0.7927296 |
| DAAM2      | -2.5626605 |
| DAB2       | -0.7814751 |
| DAB2IP     | -1.2019658 |
| DACT1      | -0.4437971 |

|         |            |
|---------|------------|
| DACT2   | -0.2743366 |
| DAG1    | -1.0565953 |
| DAGLB   | -1.080657  |
| DAK     | -0.8567836 |
| DAND5   | -0.6710007 |
| DAP     | -0.977293  |
| DAP3    | -0.4300799 |
| DAPK1   | -0.3981142 |
| DAPK2   | -1.1342735 |
| DARS2   | -0.8142614 |
| DAZAP1  | -0.3549228 |
| DBF4    | -1.093987  |
| DBNDD2  | -0.5964384 |
| DBP     | -1.0816875 |
| DBR1    | -0.25874   |
| DCAF12  | -0.8145781 |
| DCAF15  | -0.2047005 |
| DCAF4   | -0.7909622 |
| DCAF6   | -0.8657384 |
| DCAF7   | -0.610877  |
| DCAF8   | -0.5742364 |
| DCAKD   | -0.3478584 |
| DCHS1   | -1.1524062 |
| DCK     | -0.8520575 |
| DCLK2   | -0.8089628 |
| DCLRE1A | -1.3888941 |
| DCLRE1B | -0.5007002 |
| DCN     | -0.5864978 |
| DCPS    | -0.3808036 |
| DCSTAMP | -2.592072  |
| DCT     | -9.8521    |
| DCTN2   | -0.8250713 |
| DCTN6   | -0.6600266 |
| DCTPP1  | -0.3266335 |
| DCUN1D1 | -0.5763235 |
| DCXR    | -1.3719258 |
| DDAH2   | -1.2389565 |
| DDC     | -0.9535852 |
| DDHD2   | -0.3497734 |
| DDI2    | -0.4048948 |
| DDIT4L  | -2.9941072 |
| DDOST   | -0.5444293 |
| DDR2    | -0.685288  |
| DDRGK1  | -0.3381324 |
| DDX1    | -0.4937    |

|         |            |
|---------|------------|
| DDX11   | -0.3757372 |
| DDX20   | -0.5442414 |
| DDX23   | -0.649003  |
| DDX26B  | -0.4600906 |
| DDX28   | -0.555275  |
| DDX39   | -0.3668623 |
| DDX4    | -0.8840251 |
| DDX41   | -0.2593398 |
| DDX47   | -0.3577867 |
| DDX50   | -0.2272143 |
| DDX59   | -0.4186986 |
| DEAF1   | -0.4855766 |
| DEB1    | -0.4008522 |
| DECR1   | -0.6418867 |
| DECR2   | -0.3627009 |
| DEDD2   | -0.5012069 |
| DEF8    | -0.9382377 |
| DEFB11  | -0.3875356 |
| DEFB45  | -0.3142538 |
| DEFB9   | -0.6292248 |
| DEGS2   | -2.318759  |
| DEK     | -1.0644183 |
| DENND2A | -1.1799183 |
| DENND2C | -2.201532  |
| DENND4C | -0.4462502 |
| DENND6A | -0.3678007 |
| DENND6B | -0.8190415 |
| DEPDC1A | -1.2199216 |
| DEPDC1B | -0.8011251 |
| DEPTOR  | -0.62588   |
| DERA    | -1.1937304 |
| DESI1   | -0.4234138 |
| DFNA5   | -1.3015347 |
| DFNB59  | -1.7341108 |
| DGCR14  | -0.3433509 |
| DGCR6   | -0.679523  |
| DGCR8   | -0.4830542 |
| DGKG    | -1.0353482 |
| DGKI    | -0.6150887 |
| DGKZ    | -0.5619545 |
| DHCR24  | -1.3104334 |
| DHCR7   | -0.6650207 |
| DHFR    | -0.8510816 |
| DHH     | -0.8072772 |
| DHRS1   | -0.834425  |

|         |            |
|---------|------------|
| DHRS11  | -1.8083992 |
| DHRS13  | -1.0755725 |
| DHRS3   | -0.5015011 |
| DHRS7   | -0.5630059 |
| DHRSX   | -0.3127165 |
| DHTKD1  | -1.3530672 |
| DHX15   | -0.6018248 |
| DHX16   | -0.2568226 |
| DHX37   | -0.7211211 |
| DIABLO  | -0.4582415 |
| DIAP3   | -0.5164981 |
| DIDO1   | -0.2924891 |
| DIO1    | -0.2700524 |
| DIO2    | -1.1736019 |
| DIP2A   | -0.5552635 |
| DIP2B   | -0.3010554 |
| DIRAS2  | -0.9370532 |
| DIS3    | -0.3216214 |
| DIS3L   | -0.3728194 |
| DIS3L2  | -0.4210987 |
| DKK3    | -2.7082806 |
| DKKL1   | -1.5262165 |
| DLD     | -0.3299618 |
| DLG2    | -2.0965838 |
| DLG4    | -1.14657   |
| DLG5    | -0.8234386 |
| DLGAP5  | -1.7211871 |
| DLK2    | -0.3136106 |
| DLST    | -0.5718451 |
| DMAP1   | -0.3762388 |
| DMPK    | -1.9086847 |
| DMRTB1  | -1.3069766 |
| DMTN    | -0.7335944 |
| DMWD    | -0.3473868 |
| DNA2    | -1.2065015 |
| DNAAF2  | -0.9260001 |
| DNAAF3  | -0.8268313 |
| DNAJA4  | -0.4607368 |
| DNAJB1  | -0.3595004 |
| DNAJB12 | -0.3483148 |
| DNAJB13 | -1.0031064 |
| DNAJB14 | -0.1979837 |
| DNAJB2  | -1.2733984 |
| DNAJB3  | -1.1078043 |
| DNAJB4  | -0.9672051 |

|          |            |
|----------|------------|
| DNAJB7   | -1.2670052 |
| DNAJC10  | -0.2341175 |
| DNAJC11  | -0.4763832 |
| DNAJC16  | -0.5108209 |
| DNAJC17  | -0.9535651 |
| DNAJC24  | -0.3792453 |
| DNAJC25  | -0.6088326 |
| DNAJC30  | -0.3060308 |
| DNAJC4   | -0.6708002 |
| DNAJC6   | -1.6734197 |
| DNAJC8   | -0.6033511 |
| DNAJC9   | -0.5284433 |
| DNAL4    | -0.3768687 |
| DNASE1L1 | -1.0673718 |
| DND1     | -0.4805691 |
| DNLZ     | -0.4605928 |
| DNM1     | -1.379091  |
| DNM2     | -0.3625741 |
| DNMT1    | -1.1227479 |
| DNMT3B   | -0.3846993 |
| DNPEP    | -0.2493439 |
| DNPH1    | -0.7745285 |
| DNTT     | -2.7313058 |
| DNTTIP1  | -0.3723722 |
| DOCK6    | -0.8272395 |
| DOK1     | -0.3373742 |
| DOK2     | -0.315424  |
| DOK3     | -0.3573813 |
| DOK4     | -1.818517  |
| DOK7     | -1.5910316 |
| DOLK     | -0.2891812 |
| DOLPP1   | -0.4285874 |
| DONSON   | -0.2933784 |
| DOPEY2   | -0.3331494 |
| DOS      | -0.6424007 |
| DOT1L    | -0.2701469 |
| DPAGT1   | -0.4518795 |
| DPCD     | -0.5391555 |
| DPEP1    | -0.2271116 |
| DPEP2    | -1.048707  |
| DPF2     | -0.2672768 |
| DPF3     | -1.2083535 |
| DPH1     | -0.6870356 |
| DPH3     | -0.3658381 |
| DPM2     | -0.3419905 |

|          |            |
|----------|------------|
| DPM3     | -0.3935142 |
| DPP3     | -0.3755083 |
| DPP8     | -0.3325682 |
| DPT      | -1.4268777 |
| DPY19L1  | -1.1648865 |
| DPY30    | -0.7820196 |
| DPYD     | -1.1768272 |
| DPYSL4   | -1.2503603 |
| DR1      | -0.3037515 |
| DRC1     | -1.6332302 |
| DRG1     | -0.2816706 |
| DROSHA   | -0.6548944 |
| DSCC1    | -1.3298233 |
| DSCR3    | -0.4247112 |
| DSE      | -0.6026535 |
| DSN1     | -0.4224997 |
| DSTYK    | -1.5691175 |
| DTD2     | -0.9622543 |
| DTL      | -0.934175  |
| DTWD1    | -0.4600654 |
| DTX3     | -1.0920181 |
| DTYMK    | -0.5426498 |
| DUS1L    | -0.2373514 |
| DUSP14   | -0.8600826 |
| DUSP19   | -0.708508  |
| DUSP22   | -0.5048621 |
| DUSP26   | -0.7720399 |
| DUSP28   | -0.7374716 |
| DUSP8    | -1.420207  |
| DUT      | -0.9926696 |
| DXO      | -0.2926006 |
| DYM      | -0.9289742 |
| DYNC1I1  | -0.302865  |
| DYNC1LI1 | -0.3588281 |
| DYNC1LI2 | -0.2193031 |
| DYNC2LI1 | -1.2153313 |
| DYNLL2   | -0.8691654 |
| DYNLRB1  | -0.1779418 |
| DYNLT1C  | -0.395782  |
| DYNLT1F  | -0.7282281 |
| DYRK1A   | -0.3795123 |
| DYRK1B   | -0.9257071 |
| DYRK3    | -0.6602931 |
| DYSF     | -1.6624069 |
| DZANK1   | -1.9794719 |



|         |            |
|---------|------------|
| E2F1    | -1.6121473 |
| E2F2    | -1.2120895 |
| E2F3    | -0.5107131 |
| E2F4    | -1.615663  |
| E2F6    | -0.4143143 |
| E2F7    | -0.9750457 |
| E2F8    | -1.266274  |
| EAR1    | -2.2626438 |
| EAR10   | -1.9798622 |
| EAR12   | -2.3303223 |
| EAR2    | -2.156355  |
| EAR6    | -2.6409607 |
| EAR7    | -2.8691459 |
| EBPL    | -0.2904325 |
| ECD     | -0.5371203 |
| ECH1    | -0.8254762 |
| ECHS1   | -0.9159355 |
| ECI1    | -0.5166431 |
| ECI3    | -0.7114649 |
| ECT2    | -0.7110572 |
| EDF1    | -0.2357249 |
| EDN3    | -0.6339738 |
| EEF1D   | -0.364852  |
| EEF2    | -0.3500862 |
| EEF2K   | -1.374625  |
| EEFSEC  | -0.8162746 |
| EFCAB2  | -0.217932  |
| EFCAB4A | -1.8404934 |
| EFCAB5  | -0.9730654 |
| EFEMP1  | -1.0081818 |
| EFEMP2  | -0.628274  |
| EFHC1   | -0.6383054 |
| EFHD1   | -2.0099645 |
| EFNA1   | -1.6802711 |
| EFNB1   | -0.5705919 |
| EFNB2   | -0.7051466 |
| EFTUD2  | -0.5477729 |
| EGFL7   | -0.5912414 |
| EHBP1L1 | -1.0073986 |
| EHD2    | -0.6630688 |
| EHD4    | -0.2368102 |
| EHHADH  | -0.9774032 |
| EI24    | -0.87447   |
| EID1    | -0.4383278 |
| EID2B   | -0.6908033 |

|           |            |
|-----------|------------|
| EIF1-PS   | -0.2377715 |
| EIF2A     | -0.5564222 |
| EIF2AK1   | -0.8920536 |
| EIF2B1    | -0.7605863 |
| EIF2B4    | -0.3981881 |
| EIF2B5    | -0.1968036 |
| EIF2D     | -0.7848959 |
| EIF2S3X   | -0.4082294 |
| EIF3A     | -0.2442713 |
| EIF3B     | -0.2453585 |
| EIF3F     | -0.2534146 |
| EIF3I     | -0.398766  |
| EIF3J1    | -0.3336844 |
| EIF3K     | -0.2315526 |
| EIF3M     | -0.2857904 |
| EIF4B     | -0.2608018 |
| EIF4E2    | -0.2520261 |
| EIF4E3    | -0.2335897 |
| EIF4EBP1  | -0.5439553 |
| EIF4EBP2  | -0.372838  |
| EIF4EBP3  | -0.1898403 |
| EIF4ENIF1 | -0.3910675 |
| EIF4H     | -0.4720292 |
| EIF5      | -0.2811184 |
| EIF5A     | -0.5064797 |
| EIF5B     | -0.3751366 |
| ELANE     | -1.1534777 |
| ELF2      | -0.3477125 |
| ELK3      | -0.3081594 |
| ELL       | -0.3000436 |
| ELL2      | -0.5009537 |
| ELMSAN1   | -0.2902241 |
| ELN       | -2.1672735 |
| ELOF1     | -0.3191633 |
| ELP3      | -0.357543  |
| ELP4      | -0.3280556 |
| ELP6      | -0.3425927 |
| EMC1      | -0.4424467 |
| EMC10     | -0.6001012 |
| EMC3      | -0.6113601 |
| EMC8      | -0.3199444 |
| EMC9      | -0.8584642 |
| EMD       | -0.3916936 |
| EME1      | -0.8458624 |
| EMG1      | -0.2576342 |

|          |            |
|----------|------------|
| EMILIN2  | -0.9560118 |
| EML3     | -0.5572443 |
| EMP1     | -0.7710376 |
| EMP2     | -0.437089  |
| EMP3     | -0.688077  |
| ENDOD1   | -1.0331192 |
| ENDOG    | -0.5309906 |
| ENG      | -0.773705  |
| ENGASE   | -0.7163544 |
| ENHO     | -1.8480616 |
| ENKD1    | -0.8855038 |
| ENO1     | -0.2490253 |
| ENO1B    | -0.2978997 |
| ENOX1    | -0.7778223 |
| ENOX2    | -0.4742575 |
| ENPEP    | -1.3902931 |
| ENPP3    | -1.4411733 |
| ENPP5    | -1.20435   |
| ENSA     | -0.5921464 |
| ENTPD1   | -0.9427245 |
| ENTPD6   | -0.529902  |
| ENY2     | -0.6037536 |
| EOGT     | -0.3189819 |
| EP300    | -0.8042154 |
| EPB4.1   | -0.9564056 |
| EPB4.1L3 | -0.618845  |
| EPB4.2   | -1.3418417 |
| EPDR1    | -1.0820832 |
| EPG5     | -0.3945684 |
| EPHA1    | -1.3619885 |
| EPHA2    | -0.7233875 |
| EPHA3    | -1.9412601 |
| EPHA8    | -0.9670668 |
| EPHB1    | -2.356316  |
| EPHB4    | -0.3435106 |
| EPHB6    | -0.8125763 |
| EPHX2    | -0.4772122 |
| EPHX3    | -0.800159  |
| EPN1     | -0.6360326 |
| EPOR     | -1.4383144 |
| EPS15    | -0.20678   |
| EPT1     | -0.3247294 |
| EPX      | -2.8919573 |
| ERAL1    | -0.4561343 |
| ERBB2    | -1.2134109 |

|         |            |
|---------|------------|
| ERCC6L  | -1.0988102 |
| ERDR1   | -0.5430288 |
| ERF     | -0.8572664 |
| ERG     | -1.8272161 |
| ERGIC2  | -0.394825  |
| ERGIC3  | -0.6988292 |
| ERI1    | -0.9245009 |
| ERI2    | -0.5981262 |
| ERI3    | -1.0808775 |
| ERICH2  | -0.937223  |
| ERICH5  | -0.2820015 |
| ERLIN1  | -0.2755694 |
| ERLIN2  | -0.7514424 |
| ERMAP   | -1.5562615 |
| ERMP1   | -0.6811471 |
| ERP29   | -0.4753614 |
| ESCO2   | -0.9057198 |
| ESD     | -0.4663577 |
| ESPL1   | -1.2665133 |
| ESR1    | -0.9417543 |
| ESYT1   | -0.4421306 |
| ETAA1   | -0.7894902 |
| ETD     | -1.2850246 |
| ETFA    | -0.5972576 |
| ETFB    | -0.5024738 |
| ETFDH   | -0.2627716 |
| ETHE1   | -1.5794497 |
| ETL4    | -0.8532522 |
| ETV1    | -2.4570415 |
| ETV5    | -0.8126659 |
| EVC     | -1.2883751 |
| EVC2    | -0.277055  |
| EVI2A   | -0.1891842 |
| EVI5    | -0.8041    |
| EVI5L   | -0.4588676 |
| EVPL    | -1.4622033 |
| EWSR1   | -0.4930897 |
| EXO1    | -0.8120885 |
| EXOC3L  | -1.5513864 |
| EXOC3L2 | -0.7654078 |
| EXOC4   | -0.3921318 |
| EXOC6   | -0.797616  |
| EXOC7   | -0.7137141 |
| EXOSC3  | -0.2155652 |
| EXOSC4  | -0.4404388 |

|          |            |
|----------|------------|
| EXOSC5   | -0.278935  |
| EXOSC7   | -0.6748123 |
| EXOSC8   | -0.6815453 |
| EXOSC9   | -0.2440257 |
| EXT1     | -0.4471178 |
| EXTL2    | -0.8430924 |
| EZH2     | -0.6929421 |
| F2RL2    | -1.6260588 |
| F5       | -1.0536251 |
| F8       | -1.2412279 |
| FABP4    | -1.1615262 |
| FADD     | -0.4136558 |
| FADS1    | -1.2242398 |
| FADS2    | -1.9403627 |
| FADS3    | -1.4428253 |
| FAF1     | -0.614624  |
| FAHD1    | -1.5350251 |
| FAHD2A   | -0.6154699 |
| FAM101B  | -0.6441226 |
| FAM103A1 | -0.3809204 |
| FAM109B  | -1.3408198 |
| FAM110A  | -0.4187083 |
| FAM110B  | -0.6682057 |
| FAM111A  | -0.2182064 |
| FAM114A2 | -0.2930956 |
| FAM115A  | -0.6723721 |
| FAM117A  | -1.2021332 |
| FAM120A  | -0.6622286 |
| FAM122A  | -0.7973132 |
| FAM122B  | -0.637672  |
| FAM124A  | -1.6394145 |
| FAM126A  | -1.1306581 |
| FAM129C  | -1.505528  |
| FAM131A  | -0.2171931 |
| FAM132A  | -1.9053059 |
| FAM132B  | -2.8446069 |
| FAM134A  | -1.1840963 |
| FAM134C  | -0.6577568 |
| FAM135A  | -0.4534888 |
| FAM13A   | -2.9052956 |
| FAM151A  | -2.2650392 |
| FAM151B  | -0.9122305 |
| FAM161A  | -0.5237122 |
| FAM167B  | -1.0040817 |
| FAM168A  | -0.4381857 |

|          |            |
|----------|------------|
| FAM170B  | -0.7872717 |
| FAM171A1 | -2.6953623 |
| FAM172A  | -0.2806001 |
| FAM173A  | -0.4585905 |
| FAM175B  | -0.368218  |
| FAM178A  | -0.5407105 |
| FAM181B  | -0.3140459 |
| FAM192A  | -0.6684637 |
| FAM195A  | -1.0332274 |
| FAM198B  | -1.5325916 |
| FAM19A1  | -0.7339594 |
| FAM20A   | -2.283456  |
| FAM20B   | -0.2554946 |
| FAM210B  | -1.2749152 |
| FAM212A  | -0.9246559 |
| FAM212B  | -1.4311388 |
| FAM213A  | -0.2988954 |
| FAM213B  | -0.3815961 |
| FAM214B  | -1.1968813 |
| FAM216A  | -0.4825144 |
| FAM219A  | -0.4143987 |
| FAM220A  | -0.5551376 |
| FAM227A  | -0.466938  |
| FAM32A   | -0.2932186 |
| FAM3A    | -0.6775367 |
| FAM43A   | -0.5281496 |
| FAM45A   | -0.2355514 |
| FAM46C   | -0.3466249 |
| FAM50A   | -0.43999   |
| FAM53B   | -0.8351994 |
| FAM57B   | -1.0890739 |
| FAM63A   | -0.4715462 |
| FAM63B   | -0.7461357 |
| FAM64A   | -1.1397591 |
| FAM65A   | -0.6500111 |
| FAM69A   | -1.0478868 |
| FAM69B   | -1.5950568 |
| FAM73B   | -0.9190536 |
| FAM76A   | -0.370584  |
| FAM78A   | -0.8012395 |
| FAM83F   | -0.4398952 |
| FAM83G   | -0.3070169 |
| FAM84A   | -1.0645351 |
| FAM89B   | -0.7692456 |
| FAM92A   | -0.5627332 |

|        |            |
|--------|------------|
| FAM96A | -0.6879654 |
| FAM98C | -0.2902069 |
| FANCB  | -0.4073834 |
| FANCC  | -0.2728729 |
| FANCD2 | -1.4077837 |
| FANCE  | -0.2328863 |
| FANCG  | -0.5537014 |
| FANCI  | -0.5412135 |
| FANCL  | -0.7561879 |
| FANCM  | -0.7370114 |
| FARS2  | -0.8181996 |
| FASTK  | -0.4332857 |
| FAT1   | -0.4656031 |
| FAT4   | -2.6050715 |
| FBLN1  | -1.8348708 |
| FBLN2  | -0.2670507 |
| FBLN5  | -1.260015  |
| FBLN7  | -0.803256  |
| FBN1   | -0.3831785 |
| FBN2   | -1.1843348 |
| FBP1   | -2.1484716 |
| FBRSL1 | -0.2972665 |
| FBXL14 | -0.4480615 |
| FBXL15 | -0.7180877 |
| FBXL16 | -1.1914709 |
| FBXL17 | -0.3075161 |
| FBXL4  | -0.3590479 |
| FBXL6  | -0.5687847 |
| FBXL8  | -0.503396  |
| FBXO10 | -1.5799775 |
| FBXO18 | -0.1935244 |
| FBXO25 | -0.4567318 |
| FBXO28 | -0.3382018 |
| FBXO3  | -1.2552795 |
| FBXO30 | -0.5774226 |
| FBXO34 | -0.8921647 |
| FBXO36 | -1.1025596 |
| FBXO42 | -0.2708321 |
| FBXO44 | -0.450114  |
| FBXO45 | -0.3597653 |
| FBXO5  | -1.2049041 |
| FBXO7  | -0.5432077 |
| FBXO8  | -0.72576   |
| FBXO9  | -0.7000704 |
| FBXW8  | -0.221364  |

|          |            |
|----------|------------|
| FBXW9    | -0.3954666 |
| FCER1A   | -1.2322683 |
| FCER2A   | -0.9978643 |
| FCGR1    | -1.941721  |
| FCGR3    | -0.4979868 |
| FCGRT    | -2.1500254 |
| FCHO1    | -1.0514503 |
| FCHO2    | -0.3360653 |
| FCHSD1   | -0.7151971 |
| FCNA     | -0.8629065 |
| FCNAOS   | -0.4402146 |
| FCNB     | -1.7253747 |
| FDFT1    | -0.4158611 |
| FDPS     | -1.1486173 |
| FDXR     | -0.2746534 |
| FECH     | -0.8471813 |
| FEN1     | -0.7637711 |
| FERMT3   | -0.7363386 |
| FERT2    | -0.6421413 |
| FES      | -1.0041695 |
| FEZ2     | -0.2779059 |
| FFAR4    | -1.4397962 |
| FGD1     | -1.6720827 |
| FGD2     | -0.6024895 |
| FGF1     | -1.1460209 |
| FGF18    | -1.9193006 |
| FGFR1    | -0.6174417 |
| FGFR1OP2 | -0.227376  |
| FGFR3    | -1.0169399 |
| FGFR4    | -3.4915926 |
| FGFRL1   | -0.8252392 |
| FGL2     | -0.6068478 |
| FHDC1    | -1.0648713 |
| FHL5     | -0.7286687 |
| FIBIN    | -1.3449869 |
| FIBP     | -0.6143942 |
| FIG4     | -0.2707658 |
| FIGF     | -1.36548   |
| FIGNL1   | -1.1162295 |
| FIP1L1   | -0.3928385 |
| FIS1     | -0.6986804 |
| FIZ1     | -0.6206846 |
| FKBP10   | -0.3841167 |
| FKBP14   | -0.5880668 |
| FKBP1B   | -1.7763329 |



|         |            |
|---------|------------|
| FKBP7   | -1.1559973 |
| FKBP8   | -0.9105134 |
| FKBP9   | -0.9000638 |
| FLAD1   | -0.2282095 |
| FLOT2   | -0.4099364 |
| FLRT1   | -1.0961373 |
| FLRT2   | -1.4875994 |
| FLT3L   | -0.416956  |
| FLYWCH1 | -1.1517878 |
| FLYWCH2 | -0.9466226 |
| FMN1    | -0.2649617 |
| FMO1    | -1.1629739 |
| FMO2    | -4.694352  |
| FMO5    | -1.0331593 |
| FMOD    | -0.7229283 |
| FN1     | -0.5009151 |
| FN3K    | -1.1952472 |
| FN3KRP  | -0.5952511 |
| FNDC1   | -1.5399914 |
| FNDC4   | -0.4298129 |
| FNDC5   | -1.3861387 |
| FNIP2   | -1.1151261 |
| FNTA    | -0.2737131 |
| FNTB    | -1.6608264 |
| FOLR1   | -1.6513147 |
| FOLR2   | -2.6903522 |
| FOPNL   | -0.6687484 |
| FOXD2   | -0.8580065 |
| FOXD2OS | -0.9547379 |
| FOXH1   | -0.6715906 |
| FOXK2   | -0.6224523 |
| FOXM1   | -1.1067119 |
| FOXN3   | -0.4389162 |
| FOXO3   | -1.6111143 |
| FOXO4   | -0.6639066 |
| FOXRED2 | -0.3893399 |
| FPGS    | -0.8527422 |
| FRAS1   | -3.103071  |
| FRAT1   | -0.633728  |
| FRAT2   | -0.612082  |
| FREM1   | -1.4319401 |
| FREM3   | -1.0509212 |
| FRG1    | -0.2834997 |
| FRK     | -0.8659895 |
| FRMD3   | -0.6740065 |

|            |            |
|------------|------------|
| FRMD4A     | -0.3626142 |
| FRMD5      | -1.1411211 |
| FRRS1      | -0.9597454 |
| FRY        | -1.1830983 |
| FRYL       | -0.2763252 |
| FSCN3      | -0.5718622 |
| FSIP1      | -0.2438345 |
| FSTL3      | -0.4620814 |
| FTO        | -0.5816093 |
| FTSJ1      | -0.6856618 |
| FTSJ2      | -0.5399439 |
| FTSJ3      | -0.3396897 |
| FUCA1      | -0.6597858 |
| FUCA2      | -0.6769042 |
| FUNDC2     | -0.4918504 |
| FUOM       | -0.6063254 |
| FUT7       | -1.3328962 |
| FXN        | -1.3885012 |
| FXD1       | -1.0340366 |
| FXD2       | -0.4040251 |
| FXD3       | -0.4603145 |
| FXD5       | -0.5873365 |
| FXD6       | -1.902812  |
| FYCO1      | -0.4826188 |
| FZD2       | -2.7940683 |
| FZR1       | -1.2786317 |
| G2E3       | -0.274509  |
| G6PC3      | -0.330029  |
| G6PDX      | -0.4992843 |
| GAB1       | -1.4658966 |
| GABARAPL1  | -0.473156  |
| GABPB2     | -0.1974754 |
| GABRA3     | -2.854961  |
| GADD45A    | -0.9129329 |
| GADD45GIP1 | -0.5805244 |
| GAL3ST2    | -0.6512528 |
| GALC       | -1.6733899 |
| GALE       | -0.3789587 |
| GALNS      | -0.3701563 |
| GALNT1     | -0.4439969 |
| GALNT10    | -0.7731304 |
| GALNT15    | -1.2794983 |
| GALNT16    | -1.2037656 |
| GALNT2     | -0.6062493 |
| GAMT       | -0.9602947 |

|         |            |
|---------|------------|
| GAPT    | -1.2684648 |
| GAPVD1  | -0.6097603 |
| GAREM   | -1.9722846 |
| GARNL3  | -0.8553927 |
| GAS2    | -1.2987187 |
| GAS2L1  | -0.4396868 |
| GAS2L3  | -0.8980303 |
| GAS6    | -1.176549  |
| GATA1   | -1.1608901 |
| GATA5   | -0.3492434 |
| GATA6   | -1.914212  |
| GATAD1  | -0.3990402 |
| GATAD2A | -0.401856  |
| GATAD2B | -0.622397  |
| GATC    | -0.9622057 |
| GATM    | -1.0023108 |
| GBA2    | -0.3873844 |
| GBAS    | -0.4334388 |
| GBGT1   | -0.5575261 |
| GBP11   | -0.7018828 |
| GBP2B   | -2.1630816 |
| GBP8    | -1.0811    |
| GBX2    | -0.3106501 |
| GCC2    | -0.3080668 |
| GCDH    | -0.6686077 |
| GCFC2   | -0.4384439 |
| GCH1    | -0.4304929 |
| GCHFR   | -1.3352139 |
| GCLC    | -0.9193454 |
| GCLM    | -1.3248081 |
| GCM2    | -0.7249188 |
| GCNT1   | -0.1739132 |
| GDA     | -0.646215  |
| GDE1    | -0.5605469 |
| GDF1    | -0.3838966 |
| GDF10   | -2.8517447 |
| GDF11   | -0.7671325 |
| GDF3    | -1.6236422 |
| GDF6    | -3.576693  |
| GDNF    | -1.1032445 |
| GDPD1   | -1.6352434 |
| GDPD2   | -0.4401488 |
| GDPD3   | -0.7269945 |
| GDPD4   | -6.572735  |
| GDPD5   | -0.6507583 |

|          |            |
|----------|------------|
| GEMIN2   | -0.8203638 |
| GEN1     | -0.7370222 |
| GET4     | -0.5261831 |
| GFAP     | -1.5734162 |
| GFI1B    | -1.6920142 |
| GFRA2    | -0.5497394 |
| GGA1     | -0.8699932 |
| GGACT    | -0.5765204 |
| GGCX     | -0.2426703 |
| GGN      | -0.42293   |
| GGNBP2   | -0.4907789 |
| GHDC     | -0.4385934 |
| GHR      | -0.6582534 |
| GID4     | -0.5319481 |
| GID8     | -0.6302772 |
| GIGYF1   | -0.2290411 |
| GIN1     | -0.9138861 |
| GINS1    | -1.0490918 |
| GINS2    | -1.0932226 |
| GINS3    | -0.3534889 |
| GINS4    | -1.1417379 |
| GIPC1    | -0.7108226 |
| GIPC2    | -1.5039518 |
| GJA3     | -0.3962355 |
| GJB3     | -2.1334646 |
| GLB1     | -0.8409982 |
| GLB1L    | -0.8198969 |
| GLB1L2   | -1.7752769 |
| GLE1     | -0.4837589 |
| GLIPR1   | -0.3970242 |
| GLIS2    | -1.852768  |
| GLIS3    | -0.7529626 |
| GLMN     | -0.3236551 |
| GLO1     | -1.0473976 |
| GLOD4    | -0.2472844 |
| GLOD5    | -1.1138344 |
| GLRX     | -0.5120978 |
| GLRX5    | -1.6270514 |
| GLT25D1  | -0.480741  |
| GLT8D1   | -0.4110665 |
| GLTP     | -0.5697107 |
| GLTPD1   | -0.8565362 |
| GLTSCR1L | -0.3790789 |
| GLUL     | -0.9126315 |
| GLYR1    | -0.301961  |

|         |            |
|---------|------------|
| GM10046 | -0.426455  |
| GM10101 | -0.1810598 |
| GM10134 | -1.9797626 |
| GM10142 | -0.3207023 |
| GM10257 | -1.0127587 |
| GM10272 | -0.2991588 |
| GM10318 | -0.6541066 |
| GM10336 | -0.2025602 |
| GM10371 | -1.1058061 |
| GM10419 | -1.1995704 |
| GM10420 | -0.3606334 |
| GM10509 | -0.6667333 |
| GM10614 | -0.6091576 |
| GM10638 | -0.6162374 |
| GM10639 | -4.3660603 |
| GM10651 | -0.4311473 |
| GM10687 | -1.5553954 |
| GM10731 | -0.5598841 |
| GM10778 | -0.2120459 |
| GM10790 | -2.1853144 |
| GM10824 | -2.2230034 |
| GM10825 | -0.744406  |
| GM10827 | -0.5254204 |
| GM11223 | -0.874629  |
| GM11545 | -1.9078376 |
| GM11559 | -0.5536623 |
| GM11627 | -1.5295143 |
| GM11710 | -1.1280243 |
| GM11783 | -0.5466549 |
| GM12052 | -1.7411911 |
| GM12060 | -0.3572121 |
| GM12247 | -0.8294497 |
| GM12271 | -0.8920679 |
| GM12618 | -0.375598  |
| GM12620 | -1.2418284 |
| GM12657 | -0.6799407 |
| GM12666 | -0.2671695 |
| GM13051 | -1.3277597 |
| GM13111 | -0.5932341 |
| GM13157 | -0.2057314 |
| GM13247 | -0.8416817 |
| GM13251 | -0.9433391 |
| GM13272 | -0.5731907 |
| GM13275 | -0.5494075 |
| GM13372 | -1.1126804 |

|         |            |
|---------|------------|
| GM13710 | -1.933459  |
| GM13770 | -1.1601038 |
| GM14025 | -0.3164251 |
| GM14325 | -0.349659  |
| GM14432 | -0.7217932 |
| GM14484 | -0.8233974 |
| GM14625 | -0.5399525 |
| GM15023 | -0.2824774 |
| GM15032 | -0.3866205 |
| GM15411 | -1.679745  |
| GM156   | -0.8693919 |
| GM15612 | -0.8588681 |
| GM15645 | -0.6278577 |
| GM15800 | -0.5531397 |
| GM16039 | -0.5857728 |
| GM1631  | -1.656796  |
| GM16381 | -0.356142  |
| GM16515 | -0.8340082 |
| GM166   | -2.22007   |
| GM1673  | -1.0449739 |
| GM1715  | -0.3817434 |
| GM17501 | -0.9483998 |
| GM17748 | -0.5320654 |
| GM17758 | -0.3241539 |
| GM17764 | -0.4598827 |
| GM1943  | -0.2157505 |
| GM19924 | -0.8481815 |
| GM20056 | -0.498466  |
| GM20746 | -0.9493842 |
| GM20878 | -1.1615338 |
| GM2099  | -0.8451843 |
| GM2115  | -1.6864486 |
| GM2138  | -0.3636854 |
| GM21559 | -0.5293846 |
| GM2436  | -0.2934213 |
| GM2582  | -0.987812  |
| GM2696  | -0.2760472 |
| GM2A    | -0.7277198 |
| GM3099  | -0.7478294 |
| GM3219  | -0.3645954 |
| GM3258  | -0.3425779 |
| GM3325  | -1.4939849 |
| GM3364  | -2.3207781 |
| GM3448  | -0.8100295 |
| GM3776  | -4.1709604 |

|        |            |
|--------|------------|
| GM3853 | -2.4542038 |
| GM3871 | -0.7070298 |
| GM4120 | -0.3761215 |
| GM4285 | -0.9278624 |
| GM4349 | -0.5270391 |
| GM4402 | -0.6596699 |
| GM4470 | -0.3134813 |
| GM4566 | -1.2334862 |
| GM4673 | -1.3764875 |
| GM4814 | -1.1086278 |
| GM4906 | -0.4677937 |
| GM4943 | -0.6977301 |
| GM4980 | -1.931963  |
| GM5068 | -0.9204521 |
| GM5069 | -0.4535971 |
| GM5086 | -1.577812  |
| GM5093 | -0.2814174 |
| GM5099 | -0.8131902 |
| GM5132 | -1.1882172 |
| GM5141 | -0.6080296 |
| GM5177 | -2.0433176 |
| GM5296 | -0.4327147 |
| GM5396 | -0.2773447 |
| GM5463 | -0.5692041 |
| GM5526 | -0.3036537 |
| GM5589 | -0.5132999 |
| GM5593 | -1.7385125 |
| GM5617 | -0.5831137 |
| GM5643 | -0.4311132 |
| GM5665 | -0.8587129 |
| GM568  | -1.4160435 |
| GM5767 | -1.2104616 |
| GM5779 | -0.6458559 |
| GM5785 | -0.2424889 |
| GM5797 | -0.3291824 |
| GM5801 | -0.6548786 |
| GM5820 | -3.0303042 |
| GM5848 | -0.3369846 |
| GM5879 | -0.2550154 |
| GM6115 | -0.269412  |
| GM6116 | -0.6387029 |
| GM6117 | -0.7034884 |
| GM6195 | -0.6979141 |
| GM6444 | -0.2824569 |
| GM6548 | -0.2790752 |

|        |            |
|--------|------------|
| GM6557 | -0.3977594 |
| GM6625 | -0.700068  |
| GM6899 | -1.070904  |
| GM6921 | -0.2793889 |
| GM6934 | -1.0194879 |
| GM6936 | -1.1298842 |
| GM6981 | -0.3731232 |
| GM6987 | -0.4721112 |
| GM7102 | -0.316179  |
| GM7555 | -0.3581505 |
| GM7628 | -1.0789895 |
| GM7664 | -0.518889  |
| GM7931 | -0.4878211 |
| GM7936 | -0.3059926 |
| GM7968 | -0.3110635 |
| GM8013 | -0.6243742 |
| GM8094 | -0.3370781 |
| GM8212 | -0.3381877 |
| GM8220 | -0.4242494 |
| GM826  | -1.2712657 |
| GM8587 | -0.403826  |
| GM867  | -1.2491846 |
| GM8675 | -0.5179343 |
| GM8709 | -0.4561582 |
| GM8738 | -0.1865926 |
| GM8801 | -0.3885531 |
| GM9049 | -0.4276114 |
| GM9054 | -1.103198  |
| GM9079 | -0.4486113 |
| GM9234 | -0.2376919 |
| GM9465 | -0.5547345 |
| GM9525 | -0.6437192 |
| GM9733 | -1.2209864 |
| GM9744 | -1.3380628 |
| GM9855 | -0.4863045 |
| GM9895 | -1.0326395 |
| GM9920 | -0.3167458 |
| GM996  | -0.9619978 |
| GM9963 | -0.2243254 |
| GM9992 | -1.8472786 |
| GMEB1  | -0.3417697 |
| GMEB2  | -0.3378477 |
| GML    | -0.8141296 |
| GMNN   | -1.1633244 |
| GMPPA  | -0.336803  |



|         |            |
|---------|------------|
| GMPR    | -1.7344508 |
| GMPS    | -0.5270877 |
| GNA11   | -0.7799406 |
| GNA12   | -0.8777342 |
| GNA14   | -0.9336879 |
| GNAI2   | -0.4998708 |
| GNAS    | -0.3885489 |
| GNAZ    | -0.5101347 |
| GNE     | -0.2817874 |
| GNG10   | -0.6939459 |
| GNG11   | -1.0340538 |
| GNG3    | -0.3503737 |
| GNG8    | -1.8946202 |
| GNPDA1  | -0.7162786 |
| GNPTG   | -0.236958  |
| GOLIM4  | -0.5893874 |
| GOLM1   | -1.1519494 |
| GOLPH3L | -0.2705164 |
| GOLT1B  | -0.2951436 |
| GORASP2 | -0.484365  |
| GOSR1   | -0.2569976 |
| GOT2    | -0.5493608 |
| GP1BA   | -0.5854788 |
| GP1BB   | -0.9226053 |
| GP5     | -0.995079  |
| GP6     | -0.2730274 |
| GP9     | -1.1873903 |
| GPAA1   | -0.6061478 |
| GPAM    | -0.7803965 |
| GPC1    | -0.8532014 |
| GPC2    | -1.2736533 |
| GPC3    | -0.658777  |
| GPCPD1  | -0.499989  |
| GPD1    | -4.046987  |
| GPHB5   | -0.4200678 |
| GPIHBP1 | -0.40343   |
| GPM6A   | -1.8273683 |
| GPN3    | -0.4912911 |
| GPNMB   | -1.2000191 |
| GPR107  | -0.2106094 |
| GPR124  | -0.2432914 |
| GPR125  | -1.3254836 |
| GPR133  | -2.5381355 |
| GPR153  | -2.004667  |
| GPR155  | -1.1717434 |

|        |            |
|--------|------------|
| GPR156 | -0.6697853 |
| GPR157 | -0.7004638 |
| GPR160 | -0.892704  |
| GPR162 | -0.5899038 |
| GPR182 | -0.6118608 |
| GPR19  | -1.1417758 |
| GPR34  | -0.6272616 |
| GPR56  | -0.7575531 |
| GPR88  | -2.1910686 |
| GPR89  | -0.6376717 |
| GPR97  | -0.6926827 |
| GPRC5C | -1.4997897 |
| GPS2   | -0.9705286 |
| GPSM2  | -1.411809  |
| GPSM3  | -0.7139258 |
| GPT    | -0.4285612 |
| GPT2   | -0.4033876 |
| GPX1   | -1.0329776 |
| GPX4   | -1.1942978 |
| GPX8   | -0.6643457 |
| GRAP2  | -0.4275017 |
| GRASP  | -0.3977323 |
| GRB10  | -0.7367728 |
| GREB1  | -0.5476284 |
| GREM2  | -0.7925832 |
| GRHPR  | -0.4747858 |
| GRIA3  | -1.7416615 |
| GRIK5  | -1.1713195 |
| GRIN2C | -1.1521435 |
| GRINA  | -0.8705201 |
| GRK6   | -0.2046385 |
| GRN    | -0.7270641 |
| GRPEL1 | -0.2904334 |
| GRPEL2 | -0.1924644 |
| GRRP1  | -0.3006225 |
| GRSF1  | -0.3685455 |
| GRTP1  | -1.3667293 |
| GSE1   | -1.4181719 |
| GSG1   | -1.7501228 |
| GSG2   | -0.3908653 |
| GSK3A  | -0.381134  |
| GSK3B  | -0.9857988 |
| GSKIP  | -0.4731894 |
| GSN    | -0.8313341 |
| GSR    | -0.3385172 |

|          |            |
|----------|------------|
| GSS      | -1.1830502 |
| GSTA2    | -2.4116778 |
| GSTA3    | -1.2155685 |
| GSTA4    | -1.004369  |
| GSTK1    | -0.7917604 |
| GSTM1    | -1.0520797 |
| GSTM2    | -0.5170417 |
| GSTM3    | -1.1124253 |
| GSTM4    | -0.9086869 |
| GSTM5    | -1.8274288 |
| GSTO1    | -0.47189   |
| GSTP1    | -1.0227394 |
| GSTP2    | -0.5818868 |
| GSTT1    | -0.9697318 |
| GSTT2    | -0.2989512 |
| GSTZ1    | -0.69625   |
| GSX1     | -1.4940915 |
| GTF2A2   | -0.5339346 |
| GTF2E2   | -0.5790505 |
| GTF2H1   | -0.3166823 |
| GTF2H2   | -0.3168082 |
| GTF2H3   | -0.3778052 |
| GTF2H4   | -0.3166871 |
| GTF2IRD1 | -1.2635212 |
| GTF3A    | -0.621295  |
| GTF3C5   | -0.5174379 |
| GTL3     | -0.6656213 |
| GTPBP1   | -1.0548773 |
| GTPBP2   | -0.6028771 |
| GTPBP8   | -0.2646766 |
| GUCA1A   | -0.6625121 |
| GUCA1B   | -0.4556251 |
| GUCD1    | -0.5019627 |
| GUCY1A2  | -0.8930948 |
| GUCY1A3  | -2.011519  |
| GUCY1B3  | -0.8919005 |
| GUF1     | -0.4003201 |
| GUK1     | -0.69069   |
| GUSB     | -0.2679315 |
| GXYLT2   | -0.2693977 |
| GYP A    | -1.184907  |
| GYP C    | -0.6306624 |
| GYS1     | -0.4791594 |
| H1F0     | -2.3579326 |
| H1FX     | -1.6032033 |

|         |            |
|---------|------------|
| H2AFV   | -0.5841432 |
| H2AFX   | -0.7542744 |
| H2AFY   | -0.5319467 |
| H2AFZ   | -0.2348537 |
| H2-D1   | -0.3921695 |
| H2-DMA  | -0.1933947 |
| H2-M9   | -1.1118684 |
| H2-OA   | -0.2971439 |
| H2-T10  | -0.3038878 |
| H3F3A   | -0.7626872 |
| HABP4   | -0.3270154 |
| HACE1   | -0.6560636 |
| HACL1   | -0.9417381 |
| HADH    | -1.2190785 |
| HADHA   | -0.5332599 |
| HADHB   | -0.4102736 |
| HAGH    | -1.4222412 |
| HAGHL   | -1.154851  |
| HAL     | -1.0006793 |
| HARS    | -0.9717121 |
| HAT1    | -0.7257772 |
| HAUS1   | -0.7865615 |
| HAUS3   | -0.1894655 |
| HAUS4   | -0.5643988 |
| HAUS5   | -0.8454247 |
| HAUS6   | -0.6713405 |
| HAUS8   | -0.9705935 |
| HAVCR2  | -1.1021883 |
| HBB-Y   | -2.6844153 |
| HBP1    | -0.3181691 |
| HBQ1A   | -1.3402472 |
| HBQ1B   | -1.3961687 |
| HCFC1   | -0.8121667 |
| HCFC1R1 | -1.0624614 |
| HDAC10  | -0.1908207 |
| HDAC11  | -1.1168964 |
| HDAC3   | -0.7404552 |
| HDAC4   | -0.285624  |
| HDAC5   | -0.7682953 |
| HDAC7   | -0.549408  |
| HDDC3   | -0.8845472 |
| HDGF    | -0.86339   |
| HDGFL1  | -1.0573697 |
| HDGFRP2 | -0.3258987 |
| HEATR2  | -0.4135389 |

|           |            |
|-----------|------------|
| HEATR5A   | -1.0515685 |
| HEATR5B   | -0.2945123 |
| HEBP1     | -0.8427205 |
| HEBP2     | -3.3298488 |
| HECTD1    | -0.5512271 |
| HECTD3    | -0.5791612 |
| HELB      | -0.5174217 |
| HELLS     | -0.435298  |
| HELQ      | -0.7268977 |
| HELZ      | -0.347846  |
| HEMGN     | -0.2232328 |
| HEMK1     | -0.2858987 |
| HEPH      | -0.6668856 |
| HERC1     | -0.2576962 |
| HERPUD2   | -0.3654885 |
| HES1      | -0.4683602 |
| HES6      | -0.3378282 |
| HEXA      | -0.9866643 |
| HEXB      | -1.1014104 |
| HEXDC     | -0.8731353 |
| HEXIM1    | -0.5290899 |
| HEY1      | -1.40219   |
| HEY2      | -1.3242266 |
| HEYL      | -2.2505991 |
| HFE       | -1.6563029 |
| HGF       | -0.7105775 |
| HHEX      | -0.8513064 |
| HIBCH     | -0.8124328 |
| HID1      | -0.4880738 |
| HIF3A     | -0.2224104 |
| HIGD1A    | -0.2491231 |
| HIGD2A    | -0.7842012 |
| HINT2     | -0.850131  |
| HIP1      | -1.2852936 |
| HIPK1     | -0.6972556 |
| HIPK2     | -0.9015122 |
| HIRA      | -0.554935  |
| HIRIP3    | -0.6151547 |
| HIST1H1A  | -0.8768287 |
| HIST1H1B  | -0.3041592 |
| HIST1H1C  | -1.4628935 |
| HIST1H1E  | -1.4320984 |
| HIST1H2AA | -0.3545847 |
| HIST1H2AB | -0.422328  |
| HIST1H2BC | -0.6164966 |

|            |            |
|------------|------------|
| HIST1H2BP  | -0.2133727 |
| HIST1H3A   | -0.5722578 |
| HIST1H3C   | -0.5094671 |
| HIST1H3D   | -0.4547057 |
| HIST1H3G   | -0.4525971 |
| HIST1H3I   | -0.4257546 |
| HIST1H4H   | -0.9516439 |
| HIST1H4I   | -0.2619753 |
| HIST2H2BE  | -0.5943806 |
| HIST2H3B   | -0.5595036 |
| HJURP      | -0.7037482 |
| HK3        | -1.5173955 |
| HLCS       | -1.2036159 |
| HLF        | -3.188155  |
| HLX        | -0.3968043 |
| HMBOX1     | -0.3267424 |
| HMBS       | -1.454534  |
| HMCN1      | -1.3154058 |
| HMG20B     | -0.5767055 |
| HMGA2-PS1  | -0.8342514 |
| HMGB1      | -0.5234442 |
| HMGB1-RS17 | -0.7022696 |
| HMGB2      | -0.4561896 |
| HMGB3      | -1.5205493 |
| HMGCL      | -0.5680485 |
| HMGCS2     | -1.2042248 |
| HMGN2      | -0.7493243 |
| HMGXB4     | -0.220314  |
| HMMR       | -0.6769481 |
| HMOX2      | -0.2790012 |
| HN1        | -0.5404773 |
| HN1L       | -0.4937351 |
| HNMT       | -1.1191108 |
| HNRNPA0    | -0.2193127 |
| HNRNPA1    | -0.3278513 |
| HNRNPAB    | -0.2922344 |
| HNRNPD     | -0.6453071 |
| HNRNPH2    | -0.4536939 |
| HNRNPK     | -0.3596168 |
| HNRNPLL    | -0.6127167 |
| HNRNPU     | -0.3601599 |
| HNRNPUL2   | -0.3113284 |
| HOGA1      | -1.7796674 |
| HOMER2     | -0.5636401 |
| HOMER3     | -0.6888762 |

|          |            |
|----------|------------|
| HOPX     | -0.359467  |
| HOXB5OS  | -1.4867449 |
| HOXB6    | -1.5111227 |
| HOXB8    | -2.2020056 |
| HOXB9    | -1.6103373 |
| HOXC5    | -1.6443367 |
| HOXD4    | -1.9234531 |
| HP1BP3   | -0.3917856 |
| HPCA     | -0.513797  |
| HPCAL1   | -0.7611194 |
| HPGD     | -2.4408185 |
| HPN      | -0.6969891 |
| HR       | -1.5128798 |
| HRAS     | -1.2859845 |
| HRCT1    | -0.5103469 |
| HRSP12   | -0.8076701 |
| HS1BP3   | -0.3738458 |
| HS2ST1   | -0.5302477 |
| HS3ST3A1 | -0.9457195 |
| HS6ST1   | -0.9002056 |
| HSD11B1  | -0.4143777 |
| HSD17B10 | -0.4153714 |
| HSD17B11 | -0.7275367 |
| HSD17B12 | -0.2951961 |
| HSD17B4  | -0.5330935 |
| HSD3B7   | -0.3201857 |
| HSDL2    | -0.7749844 |
| HSF4     | -0.3950443 |
| HSPA12B  | -1.6507266 |
| HSPA14   | -0.2667856 |
| HSPA2    | -0.3410091 |
| HSPA4L   | -0.2953897 |
| HSPB2    | -2.2218285 |
| HSPB6    | -1.3000994 |
| HSPBP1   | -0.7027507 |
| HSPG2    | -0.8784919 |
| HTATIP2  | -1.0220838 |
| HTRA2    | -0.7288098 |
| HTRA3    | -0.8988257 |
| HUS1     | -0.2028251 |
| HYAL1    | -0.4951425 |
| IARS2    | -0.8454571 |
| IBA57    | -1.3371887 |
| ICA1     | -1.1508932 |
| ICA1L    | -0.7237527 |

|           |            |
|-----------|------------|
| ICAM4     | -1.933403  |
| ICAM5     | -0.6306357 |
| ICK       | -1.3265922 |
| ICT1      | -0.384696  |
| ID1       | -0.6955609 |
| ID4       | -2.4015749 |
| IDH1      | -1.292795  |
| IDH2      | -0.7521677 |
| IDH3A     | -0.372344  |
| IDH3G     | -0.4071159 |
| IDI1      | -0.4938612 |
| IFFO1     | -1.2409954 |
| IFI30     | -0.3743649 |
| IFITM10   | -1.4694388 |
| IFRD2     | -0.7877002 |
| IFT172    | -0.5938091 |
| IFT20     | -0.800777  |
| IFT22     | -0.4181194 |
| IFT27     | -0.4040551 |
| IFT46     | -0.4085369 |
| IFT52     | -0.2808337 |
| IFT80     | -0.4609685 |
| IFT81     | -0.3050292 |
| IGF1      | -1.0015049 |
| IGF1R     | -0.3622327 |
| IGF2R     | -0.5935707 |
| IGFBP2    | -0.8487005 |
| IGFBP3    | -0.6096137 |
| IGFBP4    | -0.6759982 |
| IGFBP5    | -2.280824  |
| IGFBP6    | -1.851152  |
| IGH-VJ558 | -1.1735191 |
| IGIP      | -0.3596015 |
| IGKV4-53  | -0.6670165 |
| IGKV6-20  | -0.7490788 |
| IGLL1     | -3.2143223 |
| IGLON5    | -1.5650935 |
| IGSF10    | -1.3301935 |
| IGSF3     | -1.7754569 |
| IGSF9B    | -0.4752328 |
| IKBIP     | -0.6959453 |
| IKZF5     | -0.3775954 |
| IL17RD    | -0.9200108 |
| IL17RE    | -0.7885618 |
| IL18BP    | -0.4771953 |



|          |            |
|----------|------------|
| IL1RL1   | -0.5702868 |
| IL1RL2   | -1.1148882 |
| IL23R    | -0.9306266 |
| IL31RA   | -1.3516014 |
| IL34     | -0.6644115 |
| IL3RA    | -0.8009958 |
| IL4      | -1.2360113 |
| IL5RA    | -0.4251478 |
| IL7      | -2.8816533 |
| ILF2     | -0.2589159 |
| ILK      | -0.829051  |
| ILKAP    | -0.5271182 |
| ILVBL    | -0.4818511 |
| IMMT     | -0.4227228 |
| IMPA2    | -0.6635609 |
| IMPDH2   | -0.3645229 |
| INCENP   | -0.6140471 |
| INF2     | -0.7192965 |
| INMT     | -1.1689544 |
| INO80C   | -0.7866983 |
| INPP5E   | -0.2330012 |
| INPP5J   | -1.9677434 |
| INPP5K   | -0.4789057 |
| INSIG1   | -0.5036197 |
| INSL5    | -0.2980084 |
| INSL6    | -0.1969051 |
| INTS1    | -0.6033921 |
| INTS10   | -0.6654911 |
| INTS4    | -0.312716  |
| INTS7    | -0.5137377 |
| INTS9    | -0.4028478 |
| INTU     | -0.9185939 |
| IP6K1    | -0.4786177 |
| IP6K2    | -0.413466  |
| IPMK     | -0.3769662 |
| IPO9     | -0.4766369 |
| IPP      | -0.5653462 |
| IQCD     | -0.691062  |
| IQCE     | -0.2517881 |
| IQCF5    | -0.6813722 |
| IQCG     | -0.4139652 |
| IQGAP2   | -0.5459192 |
| IQGAP3   | -1.3725874 |
| IQSEC1   | -0.396687  |
| IRAK1BP1 | -0.5599213 |

|          |            |
|----------|------------|
| IREB2    | -0.2712092 |
| IRF2BP1  | -0.666492  |
| IRF2BPL  | -0.2792988 |
| IRS1     | -0.267535  |
| IRS3     | -0.7818685 |
| IRX4     | -0.5154343 |
| ISCA1    | -1.4249673 |
| ISCA2    | -1.0418735 |
| ISCU     | -0.3350029 |
| ISG20    | -0.3966632 |
| ISG20L2  | -0.2315526 |
| ISLR     | -1.0153558 |
| ISLR2    | -1.5156531 |
| ISM1     | -1.3472757 |
| ISPD     | -1.595428  |
| ISYNA1   | -0.2619805 |
| ITCH     | -0.5140467 |
| ITFG3    | -0.9348674 |
| ITGA11   | -1.2161653 |
| ITGA2B   | -0.5104861 |
| ITGA3    | -0.9147582 |
| ITGA4    | -0.4875097 |
| ITGA6    | -0.6547632 |
| ITGA8    | -0.9559765 |
| ITGAD    | -0.5591846 |
| ITGAX    | -0.6154542 |
| ITGB1    | -0.3859711 |
| ITGB1BP2 | -0.877682  |
| ITGB5    | -1.881392  |
| ITGB7    | -0.6198931 |
| ITIH5    | -0.8150308 |
| ITM2A    | -0.3018494 |
| ITM2B    | -0.6734715 |
| ITSN1    | -0.2439537 |
| IVD      | -0.8623123 |
| IYD      | -0.3088613 |
| JADE1    | -0.1902542 |
| JADE3    | -1.3009009 |
| JAG1     | -0.3219805 |
| JARID2   | -0.6699691 |
| JMJD7    | -0.3227034 |
| JMJD8    | -0.2153747 |
| JMY      | -0.4370098 |
| JOSD1    | -0.8385873 |
| JOSD2    | -1.8214111 |

|            |            |
|------------|------------|
| JPX        | -0.7696619 |
| JUND       | -0.4499569 |
| JUP        | -1.7593701 |
| K230015D01 | -0.8272247 |
| KANK1      | -0.6495948 |
| KANK2      | -1.4354134 |
| KANK3      | -0.7109904 |
| KANSL2     | -0.5618901 |
| KARS       | -0.2757726 |
| KAT2B      | -0.5762019 |
| KAT6B      | -0.3011398 |
| KAT7       | -0.2043781 |
| KATNAL1    | -0.3984356 |
| KATNB1     | -0.4069734 |
| KAZALD1    | -2.8796854 |
| KAZN       | -0.4755602 |
| KBTBD12    | -1.5860353 |
| KBTBD3     | -1.914444  |
| KCNA7      | -0.5150456 |
| KCNAB3     | -0.8022838 |
| KCNB1      | -0.8488071 |
| KCNC1      | -1.1015666 |
| KCNC4      | -0.6551149 |
| KCND3      | -0.7330985 |
| KCNG2      | -0.889647  |
| KCNH2      | -0.4778619 |
| KCNIP3     | -0.6530771 |
| KCNJ1      | -1.8178551 |
| KCNJ10     | -1.1873894 |
| KCNJ16     | -5.7732553 |
| KCNK12     | -2.2088904 |
| KCNK13     | -1.1240919 |
| KCNK4      | -0.4905493 |
| KCNK5      | -0.3123846 |
| KCNMB4OS2  | -5.87776   |
| KCNN4      | -1.4855299 |
| KCNS3      | -0.915278  |
| KCP        | -0.867841  |
| KCTD12B    | -2.1295002 |
| KCTD15     | -0.4390874 |
| KCTD17     | -0.8896108 |
| KCTD19     | -1.3067126 |
| KCTD2      | -0.3406043 |
| KCTD5      | -0.2191129 |
| KCTD6      | -0.5150547 |

|         |            |
|---------|------------|
| KDELC1  | -0.8696742 |
| KDELC2  | -0.4537377 |
| KDELR1  | -0.8280273 |
| KDELR2  | -0.2588172 |
| KDELR3  | -0.9599361 |
| KDM1A   | -0.2637048 |
| KDM3A   | -0.1750679 |
| KDM6A   | -0.761148  |
| KDM7A   | -0.5449996 |
| KDR     | -0.465929  |
| KEAP1   | -0.2593808 |
| KEL     | -1.3362613 |
| KHDRBS3 | -0.9446373 |
| KHK     | -1.3068395 |
| KIF11   | -1.3276634 |
| KIF13A  | -0.622119  |
| KIF14   | -0.4474781 |
| KIF15   | -1.4438813 |
| KIF17   | -0.3410914 |
| KIF18A  | -1.1797161 |
| KIF18B  | -1.2402177 |
| KIF19A  | -0.5201564 |
| KIF20A  | -0.9589648 |
| KIF20B  | -0.4780879 |
| KIF22   | -1.2457361 |
| KIF23   | -1.2244735 |
| KIF24   | -1.0155737 |
| KIF26A  | -1.7272453 |
| KIF2A   | -0.7393799 |
| KIF2C   | -1.3002965 |
| KIF3A   | -0.4142585 |
| KIF4    | -1.1763449 |
| KIF5A   | -1.4428556 |
| KIF5C   | -0.3205135 |
| KIF7    | -0.9079492 |
| KIF9    | -0.6136217 |
| KIFAP3  | -0.5828786 |
| KIFC1   | -2.5702724 |
| KIFC3   | -1.2551548 |
| KIN     | -0.2078915 |
| KIT     | -0.6253629 |
| KITL    | -0.5502849 |
| KLC1    | -0.342093  |
| KLC4    | -0.5486937 |
| KLF1    | -1.9294882 |

|         |            |
|---------|------------|
| KLF10   | -0.9469037 |
| KLF11   | -0.7874341 |
| KLF12   | -0.2578092 |
| KLF13   | -0.4310851 |
| KLF16   | -1.4985461 |
| KLF2    | -0.2879491 |
| KLF3    | -0.4560294 |
| KLF4    | -0.7575612 |
| KLF5    | -0.7848315 |
| KLHDC10 | -0.701262  |
| KLHDC2  | -0.894969  |
| KLHDC3  | -0.6761336 |
| KLHDC8B | -0.9888356 |
| KLHDC9  | -1.3791878 |
| KLHL12  | -1.049326  |
| KLHL13  | -1.3545444 |
| KLHL14  | -0.8246729 |
| KLHL22  | -0.2790685 |
| KLHL23  | -2.4298725 |
| KLHL25  | -0.5224981 |
| KLHL30  | -1.0284    |
| KLHL32  | -0.481415  |
| KLHL36  | -0.392159  |
| KLHL7   | -1.4986448 |
| CLK1B27 | -0.4054821 |
| CLK1B9  | -1.1041977 |
| CLKB1   | -1.1195586 |
| KLRA10  | -0.2614892 |
| KLRA15  | -0.8906541 |
| KLRA19  | -0.6716361 |
| KLRA22  | -0.3205276 |
| KLRA4   | -0.7908447 |
| KLRA9   | -0.9230237 |
| KLRB1C  | -1.2101002 |
| KLRB1F  | -1.1882541 |
| KLRC3   | -0.8332927 |
| KLRD1   | -0.2781439 |
| KLRK1   | -0.9010096 |
| KMT2B   | -0.3246226 |
| KMT2E   | -0.361053  |
| KNSTRN  | -0.7060542 |
| KNTC1   | -1.1298003 |
| KPNA1   | -0.3788695 |
| KPNA2   | -0.4873147 |
| KPNB1   | -0.4094148 |

|           |            |
|-----------|------------|
| KRAS      | -0.9211745 |
| KRT14     | -0.5735288 |
| KRT15     | -0.9871526 |
| KRT19     | -1.898624  |
| KRT20     | -0.7315199 |
| KRT7      | -0.7703512 |
| KRT79     | -0.6287823 |
| KRTAP20-2 | -0.356786  |
| KRTAP31-1 | -1.3204582 |
| KRTAP5-4  | -3.5360527 |
| KRTAP8-1  | -1.2817848 |
| KRTAP9-1  | -0.4911673 |
| KTI12     | -0.199769  |
| KXD1      | -0.4774814 |
| L2HGDH    | -0.7337501 |
| L3HYPDH   | -2.383986  |
| L3MBTL2   | -0.6861134 |
| LACE1     | -0.5319507 |
| LAG3      | -0.55742   |
| LAGE3     | -0.8573942 |
| LAIR1     | -0.8816509 |
| LAMA2     | -0.8759089 |
| LAMB2     | -0.4182868 |
| LAMP1     | -0.2904296 |
| LAMTOR1   | -0.6725206 |
| LAMTOR4   | -0.7842107 |
| LARP1B    | -0.5006623 |
| LARP7     | -0.4210038 |
| LARS      | -0.261992  |
| LARS2     | -0.4043894 |
| LASP1     | -0.3415203 |
| LAT2      | -0.4238257 |
| LBH       | -0.2584219 |
| LBP       | -0.2922401 |
| LBR       | -0.4979119 |
| LBX2      | -1.4175291 |
| LCAT      | -0.8486452 |
| LCLAT1    | -0.8550131 |
| LCMT1     | -0.9388819 |
| LCT       | -1.1496696 |
| LDB1      | -0.4930005 |
| LDB2      | -2.6812296 |
| LDHB      | -1.3093932 |
| LDHC      | -1.8428597 |
| LDLRAP1   | -1.6317024 |

|            |            |
|------------|------------|
| LENG8      | -0.6291628 |
| LEPREL1    | -0.3449605 |
| LEPREL2    | -1.084157  |
| LEPREL4    | -0.3864014 |
| LEPROT     | -0.8162718 |
| LFNG       | -0.8724601 |
| LGALS1     | -0.7103119 |
| LGALS2     | -1.202992  |
| LGALS3     | -0.2019587 |
| LGALS7     | -2.0005636 |
| LGALSL     | -0.5680461 |
| LGR5       | -1.5312526 |
| LGR6       | -0.7145882 |
| LHFPL2     | -0.8654826 |
| LHPP       | -0.6396284 |
| LHX2       | -0.5588915 |
| LIAS       | -0.6262035 |
| LIFR       | -0.7628317 |
| LIG1       | -1.1090426 |
| LILRA5     | -0.3229077 |
| LIMCH1     | -1.687048  |
| LIMK1      | -0.6425052 |
| LIMS1      | -0.3419905 |
| LIMS2      | -1.0683482 |
| LIN28A     | -0.7461762 |
| LIN37      | -0.5689297 |
| LIN52      | -0.8559294 |
| LIN54      | -0.3484311 |
| LIN9       | -0.3520603 |
| LIPA       | -1.3874292 |
| LIPN       | -3.1985955 |
| LMBR1      | -1.1176679 |
| LMCD1      | -1.1725295 |
| LMF2       | -0.5835776 |
| LMNA       | -1.8633504 |
| LMNB1      | -1.3395615 |
| LMO1       | -1.0830688 |
| LMO2       | -0.8789711 |
| LMO7       | -0.4998877 |
| LMTK2      | -0.8032596 |
| LMTK3      | -0.5841131 |
| LNP        | -0.6880522 |
| LOC1000450 | -3.522418  |
| LOC1000488 | -4.3503284 |
| LOC1010557 | -0.4379532 |

|            |            |
|------------|------------|
| LOC1010558 | -0.755914  |
| LOC1010560 | -0.4861269 |
| LOC1026322 | -0.2084093 |
| LOC1026335 | -0.2054124 |
| LOC1026336 | -1.0458243 |
| LOC1026362 | -0.5379982 |
| LOC1026381 | -0.3548985 |
| LOC1026385 | -1.8321667 |
| LOC1026386 | -0.4729347 |
| LOC1026402 | -0.2207007 |
| LOC1026407 | -0.509356  |
| LOC1026407 | -1.1131554 |
| LOC1026413 | -1.1870937 |
| LOC1026413 | -0.3252125 |
| LOC1026414 | -1.1102028 |
| LOC1026415 | -0.8518715 |
| LOC1026416 | -0.4472616 |
| LOC1026420 | -0.8121676 |
| LOC1026424 | -0.2098775 |
| LOC1026425 | -0.7872083 |
| LOC1026427 | -0.2508688 |
| LOC1026428 | -0.3016934 |
| LOC1026430 | -2.2873783 |
| LOC1026430 | -0.2010298 |
| LOC1026431 | -0.5853434 |
| LOC1026432 | -0.1792016 |
| LOH12CR1   | -0.7743385 |
| LOXL1      | -2.4057026 |
| LOXL2      | -0.9487789 |
| LOXL3      | -1.308002  |
| LPCAT1     | -1.4824314 |
| LPCAT3     | -1.2439566 |
| LPHN1      | -0.8578503 |
| LPIN1      | -0.8176818 |
| LPIN2      | -0.603601  |
| LPIN3      | -0.2578731 |
| LPL        | -0.4974117 |
| LRBA       | -0.3937006 |
| LRCH4      | -0.3965282 |
| LRFN3      | -0.5275788 |
| LRIG1      | -0.3841202 |
| LRIG3      | -0.5019357 |
| LRMP       | -0.4801974 |
| LRP1       | -1.1949086 |
| LRP2       | -0.8704832 |



|         |            |
|---------|------------|
| LRPAP1  | -0.3343644 |
| LRR1    | -1.402955  |
| LRRC1   | -0.6497798 |
| LRRC14  | -0.4637604 |
| LRRC19  | -0.2693152 |
| LRRC20  | -1.5634995 |
| LRRC29  | -1.793736  |
| LRRC30  | -3.6838617 |
| LRRC32  | -0.5132833 |
| LRRC36  | -1.2516961 |
| LRRC39  | -0.5762558 |
| LRRC40  | -0.59165   |
| LRRC42  | -0.7353923 |
| LRRC4B  | -1.8042526 |
| LRRC4C  | -1.1149158 |
| LRRC56  | -0.7470732 |
| LRRC8B  | -1.2547078 |
| LRRCC1  | -0.4819965 |
| LRRFIP2 | -0.2406199 |
| LRRN1   | -3.5677097 |
| LRRN2   | -2.5604496 |
| LRRN3   | -1.167917  |
| LRRN4   | -1.5649261 |
| LRRN4CL | -0.7788982 |
| LRWD1   | -0.7106118 |
| LSM1    | -0.3814688 |
| LSM11   | -0.4818914 |
| LSM14A  | -0.3274097 |
| LSM14B  | -1.071382  |
| LSM2    | -0.5303679 |
| LSM3    | -0.4820242 |
| LSM4    | -0.2402606 |
| LSM5    | -0.419786  |
| LSM7    | -0.3495069 |
| LSMEM1  | -1.5165911 |
| LSP1    | -0.1858506 |
| LSS     | -0.3074255 |
| LST1    | -0.4053197 |
| LTA4H   | -0.840456  |
| LTB     | -0.5118856 |
| LTB4R1  | -1.0185275 |
| LTBP1   | -0.7662499 |
| LTBP2   | -0.5017619 |
| LTBP3   | -0.7995    |
| LTBP4   | -0.5123477 |

|          |            |
|----------|------------|
| LTC4S    | -1.2624092 |
| LTF      | -1.0357409 |
| LUM      | -1.6036613 |
| LURAP1L  | -1.119165  |
| LY6E     | -0.4369149 |
| LY6F     | -0.6036916 |
| LY6G     | -0.2797871 |
| LY6G6C   | -0.4005399 |
| LY6G6D   | -1.037785  |
| LY6G6E   | -0.959482  |
| LY6G6F   | -1.0530324 |
| LY6H     | -1.5876367 |
| LY6I     | -0.8818283 |
| LYL1     | -0.7727909 |
| LYNX1    | -0.7131968 |
| LYRM4    | -0.7592559 |
| LYRM5    | -0.4832544 |
| LYSMD3   | -0.3950901 |
| LYST     | -0.2521598 |
| LZTFL1   | -0.4651504 |
| LZTS2    | -0.6438971 |
| M1AP     | -0.9744864 |
| MACROD1  | -0.7358122 |
| MACROD2  | -0.4739158 |
| MAD1L1   | -1.0755672 |
| MAD2L1BP | -0.4169726 |
| MAF      | -1.4690204 |
| MAF1     | -0.7626    |
| MAFA     | -0.2451277 |
| MAFB     | -2.1269815 |
| MAFG     | -0.2895107 |
| MAFK     | -0.3757405 |
| MAGEB16  | -0.5667672 |
| MAGED1   | -0.3450265 |
| MAGED2   | -0.8988195 |
| MAGEF1   | -0.2163405 |
| MAGEH1   | -1.212234  |
| MAGEL2   | -0.6406543 |
| MAL      | -2.7023754 |
| MAN1C1   | -0.9714947 |
| MAN2B1   | -0.9294834 |
| MAN2B2   | -1.1016455 |
| MANBA    | -0.8221879 |
| MANBAL   | -0.2820706 |
| MANSC1   | -1.4097197 |

|          |            |
|----------|------------|
| MAOA     | -0.9753232 |
| MAOB     | -1.1141055 |
| MAP1A    | -1.27159   |
| MAP1LC3A | -1.5251064 |
| MAP1LC3B | -0.9332662 |
| MAP1S    | -0.3213911 |
| MAP2     | -0.7551704 |
| MAP2K2   | -0.633666  |
| MAP2K3   | -1.0637956 |
| MAP2K4   | -0.6554613 |
| MAP2K6   | -1.5748096 |
| MAP3K11  | -0.3880601 |
| MAP3K15  | -0.5309084 |
| MAP3K3   | -0.4503884 |
| MAP3K5   | -0.2808466 |
| MAP4K2   | -0.3821321 |
| MAP4K3   | -0.6754541 |
| MAP4K5   | -0.6262679 |
| MAP6     | -0.3946676 |
| MAPK13   | -0.4072166 |
| MAPK14   | -0.5361805 |
| MAPK3    | -1.3628364 |
| MAPK8    | -0.6690953 |
| MAPK8IP1 | -1.4565132 |
| MAPK9    | -0.6269999 |
| MAPRE3   | -0.8114224 |
| MAPT     | -1.8722913 |
| MARS     | -0.541985  |
| MARVELD1 | -0.4864907 |
| MAST2    | -0.7499156 |
| MAST4    | -0.417088  |
| MASTL    | -0.7560389 |
| MAT2B    | -0.4614725 |
| MATN2    | -0.399503  |
| MATR3    | -0.5835109 |
| MAU2     | -0.6212587 |
| MAVS     | -0.2930441 |
| MAZ      | -0.3106279 |
| MBD2     | -0.2480183 |
| MBD3     | -0.4016881 |
| MBLAC1   | -0.9767451 |
| MBLAC2   | -0.54232   |
| MBNL1    | -0.3569269 |
| MBNL3    | -0.8841076 |
| MBOAT2   | -1.7166061 |

|        |            |
|--------|------------|
| MBP    | -0.2820482 |
| MC1R   | -2.6382651 |
| MCAM   | -0.2511525 |
| MCC    | -1.2242808 |
| MCCC2  | -1.0368824 |
| MCEE   | -0.6651104 |
| MCF2L  | -0.7148373 |
| MCM10  | -0.8079534 |
| MCM2   | -1.37606   |
| MCM3   | -0.9328084 |
| MCM3AP | -0.8813517 |
| MCM4   | -0.9845953 |
| MCM5   | -1.3972297 |
| MCM6   | -0.7659869 |
| MCM7   | -1.3431988 |
| MCM8   | -0.5641673 |
| MCOLN3 | -0.5441184 |
| MCPH1  | -0.6851959 |
| MCPT1  | -2.0975196 |
| MCRS1  | -0.7160602 |
| MCTP1  | -1.5777278 |
| MCU    | -0.8825953 |
| MDFI   | -1.3243406 |
| MDH2   | -0.2984891 |
| MDM1   | -0.7930424 |
| ME1    | -0.3459191 |
| ME2    | -0.8270865 |
| MEAF6  | -0.2780304 |
| MED12  | -0.4262996 |
| MED18  | -0.5312676 |
| MED19  | -0.6449056 |
| MED20  | -0.3707995 |
| MED22  | -0.7061329 |
| MED24  | -0.5132451 |
| MED25  | -0.9101639 |
| MED26  | -0.5097108 |
| MED30  | -0.364953  |
| MED4   | -0.4224172 |
| MED6   | -0.3710785 |
| MED7   | -0.3459024 |
| MED9   | -0.4581862 |
| MED9OS | -1.3617642 |
| MEG3   | -1.5739508 |
| MEGF6  | -1.1328943 |
| MEGF8  | -0.6975884 |

|           |            |
|-----------|------------|
| MEGF9     | -1.0085423 |
| MEIOB     | -0.5087879 |
| MEIS1     | -0.6269174 |
| MEIS2     | -1.1441245 |
| MEMO1     | -0.7247295 |
| MEN1      | -0.4250679 |
| MERTK     | -1.157702  |
| MEST      | -1.1620672 |
| METAP1D   | -0.453752  |
| METAP2    | -0.7524014 |
| METRN     | -0.6607571 |
| METTLL13  | -0.3233728 |
| METTLL15  | -0.3775244 |
| METTLL21A | -0.4783282 |
| METTLL22  | -0.4892225 |
| METTLL24  | -2.798071  |
| METTLL5   | -0.3155108 |
| METTLL8   | -0.2711453 |
| METTLL9   | -0.3708744 |
| MEX3B     | -0.6002266 |
| MFAP2     | -1.1761038 |
| MFAP3L    | -1.9136124 |
| MFAP4     | -0.3481164 |
| MFAP5     | -1.5973384 |
| MFF       | -0.5518928 |
| MFN1      | -0.9067731 |
| MFN2      | -0.3680687 |
| MFSD10    | -0.8605652 |
| MFSD11    | -0.6081462 |
| MFSD12    | -1.070025  |
| MFSD3     | -0.5384355 |
| MFSD7C    | -1.9492419 |
| MGAT2     | -0.3854809 |
| MGAT3     | -3.835588  |
| MGAT4B    | -1.5063348 |
| MGLL      | -1.7812414 |
| MGMT      | -0.2765069 |
| MGP       | -2.505509  |
| MGST1     | -1.1685452 |
| MGST2     | -0.7063823 |
| MGST3     | -1.6293612 |
| MIB2      | -0.1881361 |
| MICAL2    | -0.3325825 |
| MICAL3    | -1.1150551 |
| MICALL2   | -1.3578796 |

|          |            |
|----------|------------|
| MICU1    | -0.4913344 |
| MICU2    | -0.4276686 |
| MID1     | -0.6479957 |
| MID1IP1  | -0.4738345 |
| MID2     | -1.2724428 |
| MIER3    | -0.8718309 |
| MIIP     | -0.7948775 |
| MILL2    | -1.3692327 |
| MINOS1   | -0.296895  |
| MINPP1   | -1.2023559 |
| MIOX     | -0.7602036 |
| MIS12    | -0.6644054 |
| MIS18A   | -0.7271638 |
| MIS18BP1 | -0.6784473 |
| MKI67    | -0.862699  |
| MKLN1    | -0.5342689 |
| MKNK2    | -0.3819223 |
| MKRN1    | -1.0105882 |
| MLANA    | -5.3769894 |
| MLH1     | -0.4040961 |
| MLLT10   | -0.5016422 |
| MLLT3    | -0.6204104 |
| MLPH     | -1.8809052 |
| MLST8    | -0.6542282 |
| MMGT1    | -0.3555894 |
| MMP11    | -1.9496074 |
| MMP12    | -1.2804506 |
| MMP15    | -2.8417647 |
| MMP17    | -0.7731137 |
| MMP2     | -1.552372  |
| MMP23    | -0.2107763 |
| MMRN1    | -1.0207844 |
| MN1      | -2.1236799 |
| MNAT1    | -0.4596391 |
| MND1     | -1.2555294 |
| MNS1     | -1.5013137 |
| MOAP1    | -0.5145087 |
| MOB2     | -0.8460851 |
| MOCOS    | -0.490809  |
| MOCS2    | -0.4367771 |
| MOGAT2   | -2.1330497 |
| MOK      | -0.9371574 |
| MORF4L1  | -0.4718018 |
| MORF4L2  | -0.3671994 |
| MORN1    | -0.9194381 |

|          |            |
|----------|------------|
| MORN2    | -0.1923249 |
| MORN4    | -0.7743964 |
| MOSPD1   | -0.8781228 |
| MOSPD3   | -0.9376907 |
| MPC2     | -0.633894  |
| MPDU1    | -0.2203302 |
| MPDZ     | -1.1110601 |
| MPEG1    | -0.5982046 |
| MPG      | -0.6003957 |
| MPHOSPH6 | -2.1842232 |
| MPHOSPH9 | -0.787396  |
| MPI      | -0.4633584 |
| MPL      | -0.6315613 |
| MPLKIP   | -0.4387622 |
| MPO      | -0.8229957 |
| MPP1     | -1.0320935 |
| MPP2     | -1.4168744 |
| MPPE1    | -0.2453692 |
| MPPED2   | -0.929816  |
| MPRIP    | -0.5598803 |
| MPST     | -1.1379433 |
| MPV17    | -0.2587247 |
| MPV17L2  | -1.4081063 |
| MPZL1    | -0.4385757 |
| MR1      | -1.5443707 |
| MRAP     | -2.3300903 |
| MRAP2    | -2.6468787 |
| MRC1     | -2.5503783 |
| MRC2     | -1.2198918 |
| MRE11A   | -0.4608803 |
| MRGPRE   | -0.2538085 |
| MRI1     | -0.7115564 |
| MRM1     | -0.3472672 |
| MRPL10   | -0.1944704 |
| MRPL11   | -0.3691502 |
| MRPL12   | -0.5013809 |
| MRPL13   | -0.3593774 |
| MRPL14   | -0.4453635 |
| MRPL18   | -0.3885317 |
| MRPL19   | -0.3113384 |
| MRPL2    | -0.5101242 |
| MRPL20   | -0.394639  |
| MRPL22   | -0.3805862 |
| MRPL27   | -0.5226722 |
| MRPL28   | -0.9940167 |

|         |            |
|---------|------------|
| MRPL33  | -0.3112063 |
| MRPL34  | -0.354888  |
| MRPL37  | -0.6151476 |
| MRPL40  | -0.3240976 |
| MRPL41  | -0.369154  |
| MRPL42  | -0.4214206 |
| MRPL46  | -0.2112446 |
| MRPL47  | -0.2066307 |
| MRPL48  | -0.4642487 |
| MRPL49  | -0.5114822 |
| MRPL51  | -0.4062519 |
| MRPL53  | -0.4933372 |
| MRPL54  | -0.3001747 |
| MRPL55  | -0.4011498 |
| MRPL57  | -0.363174  |
| MRPL9   | -0.2991524 |
| MRPS11  | -1.0095687 |
| MRPS12  | -0.202899  |
| MRPS15  | -0.3267846 |
| MRPS17  | -0.2289867 |
| MRPS18A | -0.1881824 |
| MRPS24  | -0.4839788 |
| MRPS26  | -0.402348  |
| MRPS27  | -0.3173723 |
| MRPS28  | -0.4041939 |
| MRPS31  | -0.2590675 |
| MRPS34  | -0.2408423 |
| MRPS35  | -0.6021724 |
| MRPS36  | -0.316895  |
| MRPS5   | -0.3063574 |
| MRVI1   | -1.0795922 |
| MS4A3   | -0.2828593 |
| MS4A8A  | -0.7873416 |
| MSANTD3 | -0.6574936 |
| MSC     | -1.4184532 |
| MSH2    | -0.3367257 |
| MSH3    | -0.2190137 |
| MSH6    | -0.5670967 |
| MSLN    | -0.8142085 |
| MSMB    | -1.591404  |
| MSMO1   | -0.2941275 |
| MSMP    | -0.3148162 |
| MSRA    | -0.2364636 |
| MSRB2   | -0.5865116 |
| MSRB3   | -1.000279  |



|         |            |
|---------|------------|
| MST1    | -0.7619302 |
| MST1R   | -0.9775548 |
| MSTO1   | -0.1866798 |
| MSX1    | -1.5246999 |
| MTA1    | -0.6541209 |
| MTA2    | -0.2733636 |
| MTA3    | -0.4653564 |
| MTAP7D3 | -0.5175254 |
| MTCH1   | -0.2870622 |
| MTCH2   | -0.4167161 |
| MTERFD1 | -0.2804761 |
| MTF1    | -0.3584948 |
| MTF2    | -0.2871504 |
| MTFP1   | -0.8917899 |
| MTFR1   | -0.9788418 |
| MTHFD1  | -0.6813111 |
| MTHFD1L | -0.4098177 |
| MTHFD2  | -0.3929405 |
| MTHFR   | -0.505064  |
| MTL5    | -1.731926  |
| MTMR10  | -0.5442486 |
| MTMR2   | -0.4185581 |
| MTMR4   | -0.3117147 |
| MTMR9   | -0.6922264 |
| MTO1    | -0.4716711 |
| MTR     | -0.3702755 |
| MTRF1   | -0.3564889 |
| MTSS1L  | -2.5865705 |
| MTUS1   | -0.4141405 |
| MTUS2   | -0.7797017 |
| MTX1    | -0.3529215 |
| MTX2    | -0.4551497 |
| MUC6    | -0.6128781 |
| MUG1    | -1.0918024 |
| MUG2    | -1.0332298 |
| MUM1    | -0.7644019 |
| MUP1    | -3.0010715 |
| MUP17   | -2.7033257 |
| MUP19   | -3.6626303 |
| MUP21   | -0.3830004 |
| MUP4    | -1.4366035 |
| MUS81   | -0.3865829 |
| MUT     | -0.4680133 |
| MVB12B  | -1.03159   |
| MVK     | -0.5436006 |

|          |            |
|----------|------------|
| MXD3     | -1.6002607 |
| MXD4     | -0.5671887 |
| MXRA7    | -1.5458357 |
| MXRA8    | -1.754519  |
| MYADM    | -0.342865  |
| MYADML2  | -1.218334  |
| MYB      | -0.9587207 |
| MYBL2    | -1.1908851 |
| MYCT1    | -1.4320269 |
| MYEF2    | -0.375073  |
| MYG1     | -0.6788287 |
| MYH1     | -2.038703  |
| MYH10    | -1.4971712 |
| MYH2     | -1.6311603 |
| MYH8     | -1.7083135 |
| MYL12B   | -0.4328442 |
| MYL6     | -0.3687382 |
| MYL6B    | -0.975549  |
| MYL9     | -0.5564256 |
| MYLIP    | -0.2914834 |
| MYLK3    | -0.8353479 |
| MYLPF    | -0.6885183 |
| MYO18A   | -0.8260012 |
| MYO1D    | -0.3945818 |
| MYO1F    | -0.6826849 |
| MYO5B    | -0.8115575 |
| MYO7A    | -0.8805757 |
| MYO9A    | -1.0307314 |
| MYOM1    | -1.396368  |
| MYOM3    | -2.8665824 |
| MZB1     | -0.3333459 |
| MZT1     | -1.2799029 |
| MZT2     | -1.0907149 |
| NAA10    | -0.7266312 |
| NAA15    | -0.5115161 |
| NAA38    | -0.5369716 |
| NAAA     | -0.6331005 |
| NAALADL1 | -1.142252  |
| NABP2    | -0.2701798 |
| NACAD    | -2.8335214 |
| NACC1    | -0.3477278 |
| NACC2    | -0.741128  |
| NADK2    | -1.0575151 |
| NAGA     | -1.1367764 |
| NAGLU    | -0.5157642 |

|         |            |
|---------|------------|
| NAIP2   | -0.4816279 |
| NANOS1  | -0.4364009 |
| NANP    | -1.1226163 |
| NANS    | -0.3272882 |
| NAP1L4  | -0.3230062 |
| NAPA    | -0.5200996 |
| NAPRT1  | -1.2368054 |
| NARF    | -0.9454346 |
| NARS    | -0.324163  |
| NASP    | -0.550395  |
| NAT2    | -0.3676596 |
| NAT6    | -1.4986157 |
| NAT8L   | -2.6644976 |
| NAV1    | -0.5744906 |
| NAV3    | -0.4644764 |
| NBEAL2  | -0.7269135 |
| NBR1    | -0.4415455 |
| NCAM1   | -1.4589248 |
| NCAPD2  | -1.047679  |
| NCAPD3  | -0.9208794 |
| NCAPG   | -0.8455923 |
| NCAPG2  | -1.4256201 |
| NCAPH   | -0.8357167 |
| NCAPH2  | -0.7878623 |
| NCBP1   | -0.1786122 |
| NCK2    | -0.2281451 |
| NCKAP1  | -0.3858452 |
| NCKIPSD | -0.2678845 |
| NCLN    | -0.3615365 |
| NCOA3   | -0.2099605 |
| NCOA4   | -0.6117029 |
| NCR1    | -0.6612725 |
| ND1     | -0.2109857 |
| ND4L    | -0.3566551 |
| NDC80   | -0.7316356 |
| NDE1    | -0.5108895 |
| NDN     | -0.610805  |
| NDRG2   | -0.8671694 |
| NDST1   | -0.3925338 |
| NDST2   | -0.9182034 |
| NDST3   | -0.8995922 |
| NDUFA10 | -0.385438  |
| NDUFA11 | -0.2908702 |
| NDUFA2  | -0.4918399 |
| NDUFA4  | -0.7163291 |

|          |            |
|----------|------------|
| NDUFA4L2 | -0.958524  |
| NDUFA5   | -0.263227  |
| NDUFA6   | -0.3237763 |
| NDUFA7   | -0.4278135 |
| NDUFA8   | -0.214191  |
| NDUFA9   | -0.3897042 |
| NDUFAF3  | -0.65486   |
| NDUFAF7  | -0.4375854 |
| NDUFB10  | -0.550168  |
| NDUFB11  | -0.1947198 |
| NDUFB4   | -0.2759643 |
| NDUFB7   | -0.6290369 |
| NDUFB8   | -0.4970012 |
| NDUFB9   | -0.6664681 |
| NDUFS1   | -0.4936471 |
| NDUFS4   | -0.3933172 |
| NDUFS6   | -0.4045076 |
| NDUFS7   | -0.4003015 |
| NDUFS8   | -0.4478974 |
| NDUFV1   | -0.6873655 |
| NDUFV2   | -0.437366  |
| NDUFV3   | -0.3993435 |
| NECAP2   | -0.8952475 |
| NEDD1    | -0.3391066 |
| NEDD4    | -0.9829121 |
| NEDD8    | -0.2326222 |
| NEDD9    | -0.3902187 |
| NEIL2    | -1.0228887 |
| NEIL3    | -1.5131388 |
| NEK1     | -0.8859742 |
| NEK2     | -0.7963657 |
| NEK7     | -0.3102689 |
| NEK8     | -0.992106  |
| NELFA    | -0.5245237 |
| NELFCD   | -0.58288   |
| NELFE    | -0.6142449 |
| NENF     | -1.2611065 |
| NES      | -0.594914  |
| NET1     | -0.6598766 |
| NEU3     | -0.3956275 |
| NEXN     | -1.019074  |
| NFAM1    | -1.1243424 |
| NFASC    | -0.9859648 |
| NFATC2IP | -0.3677955 |
| NFATC4   | -0.65832   |

|         |            |
|---------|------------|
| NFE2    | -1.2973042 |
| NFIA    | -1.8604007 |
| NFIB    | -0.8150129 |
| NFIC    | -1.5289116 |
| NFIX    | -1.0460792 |
| NFKBIL1 | -0.2311349 |
| NFU1    | -0.3061161 |
| NFX1    | -0.2179384 |
| NFYB    | -0.4432044 |
| NFYC    | -0.4219599 |
| NGFRAP1 | -1.1840863 |
| NGP     | -0.8877988 |
| NHEJ1   | -0.7023907 |
| NHLRC2  | -0.4341788 |
| NHLRC4  | -2.099299  |
| NHP2L1  | -0.1861634 |
| NHS     | -0.5668206 |
| NICN1   | -1.011384  |
| NID2    | -1.15972   |
| NINJ2   | -1.7774444 |
| NINL    | -1.243304  |
| NIPA1   | -1.0520325 |
| NIPAL3  | -0.2976508 |
| NIT2    | -0.2371049 |
| NKAIN4  | -2.0447657 |
| NKD1    | -1.5821614 |
| NKG7    | -0.7416782 |
| NKIRAS2 | -0.2396188 |
| NKX2-3  | -1.7144296 |
| NKX2-5  | -0.8641992 |
| NLGN2   | -0.3817101 |
| NLRP12  | -0.7112317 |
| NLRP5   | -1.0695393 |
| NLRX1   | -0.4045315 |
| NME3    | -1.0269284 |
| NME4    | -1.3797617 |
| NME6    | -0.2988658 |
| NME7    | -1.2781732 |
| NME9    | -2.2544944 |
| NMNAT3  | -0.8887081 |
| NMRAL1  | -0.8140664 |
| NMT1    | -0.2074814 |
| NNMT    | -1.1801035 |
| NOC4L   | -0.3116245 |
| NOL3    | -1.1997182 |

|         |            |
|---------|------------|
| NOL9    | -0.4815059 |
| NOS1    | -0.9468684 |
| NOS1AP  | -0.9017179 |
| NOSTRIN | -0.7394183 |
| NOTCH3  | -0.5105686 |
| NOTCH4  | -0.8584542 |
| NPAS4   | -0.8614583 |
| NPC1    | -0.5458183 |
| NPC2    | -0.3770986 |
| NPCD    | -1.2652633 |
| NPHP1   | -1.442157  |
| NPL     | -0.3363819 |
| NPLOC4  | -0.4415798 |
| NPM3    | -0.5559208 |
| NPNT    | -0.5048339 |
| NPPA    | -0.5484951 |
| NPR1    | -2.1732802 |
| NPR2    | -0.4801831 |
| NPRL3   | -0.9663668 |
| NPTN    | -0.5231872 |
| NPY     | -3.1448357 |
| NQO1    | -2.1468263 |
| NQO2    | -0.906786  |
| NR1D1   | -1.7955186 |
| NR1D2   | -0.47521   |
| NR2C2   | -0.2725663 |
| NR2C2AP | -0.5052605 |
| NR2F1   | -1.7077618 |
| NR2F2   | -0.7746706 |
| NR2F6   | -0.5530577 |
| NR5A1   | -0.4250197 |
| NRADD   | -0.6360459 |
| NRARP   | -1.3373988 |
| NRBF2   | -0.2845678 |
| NRBP1   | -0.5044909 |
| NRBP2   | -1.1711285 |
| NRDE2   | -0.6972466 |
| NREP    | -3.2677007 |
| NRF1    | -0.8001118 |
| NRG1    | -0.3977044 |
| NRG2    | -0.7765191 |
| NRGN    | -1.3404312 |
| NRIP1   | -0.3771796 |
| NRIP3   | -2.3388398 |
| NRL     | -1.1437535 |

|          |            |
|----------|------------|
| NRM      | -1.0176339 |
| NRP1     | -0.5620837 |
| NRXN1    | -0.4993331 |
| NRXN2    | -0.9793925 |
| NSDHL    | -0.7171464 |
| NSL1     | -0.990768  |
| NSMCE1   | -0.7125344 |
| NSMCE2   | -0.441545  |
| NSMCE4A  | -0.3571143 |
| NT5C2    | -1.0815964 |
| NT5C3    | -0.4845104 |
| NT5DC1   | -0.3345027 |
| NT5DC2   | -1.5082524 |
| NTAN1    | -0.3303833 |
| NTM      | -1.259295  |
| NTMT1    | -0.2779622 |
| NTN3     | -1.2633362 |
| NTN4     | -2.1191175 |
| NTPCR    | -0.5789571 |
| NTS      | -0.6614914 |
| NUAK1    | -1.487601  |
| NUBP2    | -0.4726725 |
| NUCB1    | -0.8354235 |
| NUCB2    | -0.6199131 |
| NUCKS1   | -0.4851394 |
| NUDCD1   | -0.5483398 |
| NUDCD2   | -1.0859838 |
| NUDT1    | -0.8163962 |
| NUDT12   | -1.1724114 |
| NUDT14   | -0.7187581 |
| NUDT16   | -0.3867044 |
| NUDT16L1 | -0.4249044 |
| NUDT19   | -0.6163573 |
| NUDT2    | -0.4595008 |
| NUDT21   | -0.5458813 |
| NUDT22   | -0.9885955 |
| NUDT4    | -0.6555934 |
| NUDT5    | -0.3358154 |
| NUDT7    | -0.4942689 |
| NUDT8    | -0.4096689 |
| NUDT9    | -0.62149   |
| NUF2     | -1.0899849 |
| NUP107   | -0.4734211 |
| NUP133   | -0.4898858 |
| NUP155   | -1.0041199 |

|             |            |
|-------------|------------|
| NUP160      | -0.4107881 |
| NUP188      | -0.3604701 |
| NUP35       | -0.5055361 |
| NUP43       | -0.4816475 |
| NUP50       | -0.7969537 |
| NUP54       | -0.1729493 |
| NUP85       | -0.5392022 |
| NUPL1       | -0.391223  |
| NUSAP1      | -0.9785633 |
| NUTF2       | -0.4673972 |
| NWD2        | -1.1258323 |
| NXN         | -0.1826549 |
| NXNL2       | -1.2527442 |
| NXPE2       | -1.521491  |
| NXPE4       | -1.4540558 |
| NXPE5       | -1.69558   |
| NXPH3       | -1.4730489 |
| NYAP1       | -0.7990434 |
| OAF         | -0.8837633 |
| OARD1       | -0.7899799 |
| OAT         | -0.593565  |
| OAZ1        | -0.5327044 |
| OCA2        | -3.1264694 |
| OCIAD2      | -1.2253487 |
| OCRL        | -0.3400021 |
| ODC1        | -0.4570403 |
| ODF2        | -0.7677631 |
| ODF3B       | -1.9619033 |
| OGDH        | -0.3506913 |
| OGFOD1      | -0.4194403 |
| OGFOD2      | -0.5377545 |
| OGFOD3      | -0.8564773 |
| OGT         | -0.2226763 |
| OIP5        | -0.8731823 |
| OIT3        | -2.0079117 |
| OLFM1       | -0.4564221 |
| OLFM2       | -1.3921218 |
| OLFML1      | -3.2348373 |
| OLFML2B     | -1.9340477 |
| OLFML3      | -1.6542552 |
| OLFR1030    | -0.2851346 |
| OLFR1054    | -0.5583127 |
| OLFR1077-PS | -0.6045692 |
| OLFR1121    | -1.0852859 |
| OLFR1168    | -1.0795381 |



|          |            |
|----------|------------|
| OLFR1186 | -1.3252051 |
| OLFR12   | -0.3023515 |
| OLFR1275 | -0.6740818 |
| OLFR1340 | -1.6480267 |
| OLFR1352 | -1.0993361 |
| OLFR1463 | -2.678186  |
| OLFR1465 | -1.4676094 |
| OLFR1466 | -2.1381423 |
| OLFR1490 | -1.1738329 |
| OLFR161  | -0.2822776 |
| OLFR297  | -0.7622516 |
| OLFR339  | -1.0793719 |
| OLFR466  | -0.428488  |
| OLFR469  | -1.3475077 |
| OLFR541  | -0.6145947 |
| OLFR611  | -1.2378664 |
| OLFR649  | -1.1650624 |
| OLFR67   | -0.4101403 |
| OLFR695  | -0.4424365 |
| OLFR728  | -6.072307  |
| OLFR821  | -0.6990252 |
| OLFR916  | -0.5321865 |
| OMP      | -0.7265043 |
| OOSP1    | -0.8913775 |
| OOSP2    | -1.052398  |
| OPA3     | -0.2974868 |
| OPHN1    | -1.1366732 |
| OPLAH    | -1.1095271 |
| OPTN     | -0.5909596 |
| ORC1     | -1.7432737 |
| ORC2     | -0.9640298 |
| ORC5     | -1.119523  |
| ORC6     | -1.0222654 |
| ORMDL1   | -0.2091394 |
| ORMDL3   | -0.6798506 |
| OSBP     | -0.6135855 |
| OSBPL1A  | -0.7683373 |
| OSBPL2   | -0.4967308 |
| OSBPL8   | -0.5080037 |
| OSCP1    | -1.1310041 |
| OSGEP    | -0.5935831 |
| OSGEPL1  | -1.0051289 |
| OSGIN1   | -0.9731755 |
| OSR1     | -1.6469944 |
| OST4     | -0.8269782 |

|          |            |
|----------|------------|
| OSTM1    | -0.4595842 |
| OTOF     | -0.3855424 |
| OTOP1    | -0.8308666 |
| OTUB1    | -0.5854502 |
| OTUD5    | -0.2628613 |
| OVCH2    | -0.1858916 |
| OVOL2    | -0.3417697 |
| OXCT1    | -0.6089845 |
| OXCT2A   | -0.9544466 |
| OXLD1    | -0.7682047 |
| OXNAD1   | -0.6096554 |
| OXSM     | -0.2960756 |
| P2RX1    | -1.3407593 |
| P2RX7    | -0.6576674 |
| P2RY1    | -0.7102547 |
| P2RY12   | -0.9298587 |
| P2RY6    | -1.2131166 |
| P4HB     | -0.3346338 |
| PA2G4    | -0.7253175 |
| PABPC1   | -0.4289966 |
| PABPC4   | -1.1120448 |
| PABPC4L  | -1.8918552 |
| PABPC5   | -0.3369422 |
| PABPN1   | -0.3084803 |
| PABPN1L  | -0.5227206 |
| PACRG    | -1.6637683 |
| PACS1    | -1.0417352 |
| PACSIN3  | -0.9712248 |
| PADI4    | -0.8297503 |
| PAFAH1B3 | -0.7401862 |
| PAFAH2   | -1.0972633 |
| PAGR1A   | -0.3651094 |
| PAICS    | -0.8843317 |
| PAIP2    | -0.2949977 |
| PAK1     | -1.9538255 |
| PALB2    | -1.1301544 |
| PALD1    | -0.471292  |
| PALM     | -1.2771511 |
| PAN2     | -0.3935037 |
| PAOX     | -1.1242323 |
| PAPOLA   | -0.5727015 |
| PAPPA2   | -0.3986993 |
| PAPSS1   | -0.482697  |
| PAQR4    | -1.8707113 |
| PAQR6    | -1.6086395 |

|         |            |
|---------|------------|
| PAQR7   | -0.6412621 |
| PAQR9   | -1.7382731 |
| PARD6A  | -0.7873068 |
| PARK2   | -0.4727304 |
| PARK7   | -0.384305  |
| PARL    | -0.2006292 |
| PARP1   | -0.5244403 |
| PARP16  | -0.5616517 |
| PARP2   | -0.3740115 |
| PARPBP  | -1.1995866 |
| PARVB   | -1.0805607 |
| PARVG   | -0.6117373 |
| PASK    | -1.1352844 |
| PATZ1   | -0.474154  |
| PAX3    | -2.4164448 |
| PAX8    | -0.9836628 |
| PBDC1   | -0.2805319 |
| PBK     | -1.4648948 |
| PBRM1   | -0.6697555 |
| PBX3    | -0.6195588 |
| PCBD2   | -0.3359981 |
| PCBP4   | -0.8018947 |
| PCCA    | -0.8129907 |
| PCCB    | -0.7534134 |
| PCDH10  | -0.6154838 |
| PCDH12  | -1.8642092 |
| PCDH17  | -1.4317939 |
| PCDH8   | -1.5060198 |
| PCDHAC1 | -0.6922429 |
| PCDHB16 | -0.3991973 |
| PCDHB20 | -0.9116614 |
| PCDHB6  | -0.5639203 |
| PCGF1   | -0.9244442 |
| PCGF2   | -0.7080944 |
| PCIF1   | -0.428124  |
| PCK1    | -2.3654268 |
| PCK2    | -0.9115422 |
| PCM1    | -0.4345136 |
| PCMT1   | -0.5034566 |
| PCMTD2  | -0.3688631 |
| PCNA    | -0.7707419 |
| PCNT    | -0.7165628 |
| PCNX    | -0.4260509 |
| PCOLCE  | -1.3293157 |
| PCP4L1  | -0.7395711 |

|          |            |
|----------|------------|
| PCSK4    | -0.2263825 |
| PCSK5    | -0.8123901 |
| PCX      | -1.2371488 |
| PCYOX1   | -0.3639979 |
| PCYOX1L  | -1.0892081 |
| PCYT1A   | -0.6457386 |
| PCYT1B   | -0.7024272 |
| PCYT2    | -0.2765942 |
| PDAP1    | -0.5250325 |
| PDCD6    | -0.2874069 |
| PDCL     | -0.495564  |
| PDDC1    | -0.6340294 |
| PDE2A    | -0.4703436 |
| PDE6D    | -0.541965  |
| PDE8B    | -1.6124821 |
| PDGFC    | -1.3545635 |
| PDGFD    | -1.5661788 |
| PDGFRB   | -0.9406414 |
| PDGFRL   | -1.2302806 |
| PDHA1    | -0.2869825 |
| PDHB     | -0.3430872 |
| PDILT    | -1.4080691 |
| PDK2     | -1.3783991 |
| PDK3     | -0.4711824 |
| PDLIM3   | -1.4519536 |
| PDLIM7   | -0.2226238 |
| PDP2     | -0.5488577 |
| PDPK1    | -0.3251095 |
| PDS5A    | -0.2959113 |
| PDSS1    | -0.4748464 |
| PDSS2    | -0.3199689 |
| PDXDC1   | -0.2038703 |
| PDXP     | -0.5323725 |
| PDZD11   | -0.499857  |
| PDZK1IP1 | -0.7254505 |
| PEAK1    | -0.3259158 |
| PEAR1    | -0.3417859 |
| PECR     | -0.6648736 |
| PEF1     | -0.2634597 |
| PEG12    | -1.0378911 |
| PEG3     | -1.5422626 |
| PELI2    | -1.2822258 |
| PELO     | -0.2618036 |
| PEMT     | -0.3227458 |
| PENK     | -0.3661237 |

|         |            |
|---------|------------|
| PEO1    | -0.2796068 |
| PER3    | -1.0596507 |
| PERM1   | -0.9547818 |
| PERP    | -1.4256227 |
| PET112  | -0.2709909 |
| PEX11G  | -0.4227371 |
| PEX19   | -0.8136063 |
| PEX2    | -0.6311417 |
| PEX5    | -0.7371936 |
| PEX7    | -0.6381016 |
| PF4     | -0.6307335 |
| PFDN1   | -0.4128451 |
| PFKFB1  | -1.0129585 |
| PFKFB2  | -0.968256  |
| PFKL    | -0.4956932 |
| PFKM    | -1.9322968 |
| PFN1    | -0.2931428 |
| PFN4    | -1.2968397 |
| PGAM2   | -0.9725206 |
| PGAP2   | -0.1791558 |
| PGAP3   | -0.8596196 |
| PGBD5   | -1.8399563 |
| PGD     | -0.4876614 |
| PGGT1B  | -0.5852089 |
| PGLS    | -0.7654781 |
| PGM5    | -0.4194934 |
| PGP     | -0.8885589 |
| PGPEP1  | -0.3813679 |
| PGRMC1  | -0.4593949 |
| PGRMC2  | -0.743938  |
| PHACTR1 | -1.3297629 |
| PHACTR2 | -0.9599562 |
| PHACTR4 | -0.5676704 |
| PHB     | -0.358994  |
| PHB2    | -0.8023639 |
| PHF10   | -0.8202367 |
| PHF12   | -0.5900865 |
| PHF14   | -0.5274048 |
| PHF19   | -0.3731732 |
| PHF2    | -0.4731426 |
| PHF23   | -0.2694817 |
| PHF5A   | -1.0459232 |
| PHKA2   | -0.8074789 |
| PHKB    | -0.3726485 |
| PHKG2   | -0.4057279 |

|          |            |
|----------|------------|
| PHLDA3   | -1.5436764 |
| PHLDB2   | -1.2988591 |
| PHLPP2   | -0.8193317 |
| PHOSPHO1 | -1.3809941 |
| PHPT1    | -0.5216808 |
| PHYHIP   | -2.6706376 |
| PHYKPL   | -0.4856811 |
| PI16     | -1.475081  |
| PI4K2B   | -1.3037949 |
| PI4KB    | -0.5456429 |
| PIANP    | -1.4042554 |
| PIAS1    | -0.3706117 |
| PIAS4    | -0.8110247 |
| PIDD1    | -1.013475  |
| PIGA     | -0.528656  |
| PIGH     | -0.5213714 |
| PIGK     | -0.4069848 |
| PIGP     | -0.5361676 |
| PIGQ     | -1.1531234 |
| PIGT     | -1.0929432 |
| PIGYL    | -0.8556018 |
| PIGZ     | -1.5482643 |
| PIH1D1   | -0.2294245 |
| PIK3C3   | -0.5688267 |
| PIK3R1   | -0.5913725 |
| PIK3R2   | -1.4350576 |
| PILRB1   | -0.4529591 |
| PIN1     | -0.3387575 |
| PIN1RT1  | -0.3032913 |
| PINK1    | -0.9554677 |
| PIP      | -0.6344664 |
| PIP4K2A  | -0.723805  |
| PIP4K2C  | -0.5400085 |
| PIR      | -1.4183836 |
| PITHD1   | -0.7602429 |
| PITPNB   | -0.4047222 |
| PITPNM2  | -0.4672098 |
| PITPNM3  | -3.3781004 |
| PITRM1   | -0.2305708 |
| PJA2     | -0.2871933 |
| PKHD1L1  | -1.2361434 |
| PKIA     | -1.350724  |
| PKLR     | -1.8134296 |
| PKMYT1   | -0.7484489 |
| PKN2     | -0.4105263 |

|          |            |
|----------|------------|
| PKN3     | -0.8576419 |
| PKNOX2   | -1.9119928 |
| PLA2G12A | -1.1132283 |
| PLA2G15  | -1.611104  |
| PLA2G16  | -0.2066031 |
| PLA2G2E  | -2.6578188 |
| PLA2G4C  | -0.4426994 |
| PLA2G6   | -0.5482459 |
| PLAC9A   | -0.5987492 |
| PLAU     | -0.7962608 |
| PLCB1    | -0.8289897 |
| PLCB3    | -0.3484125 |
| PLCD1    | -0.2542648 |
| PLCE1    | -1.0888982 |
| PLCL2    | -0.7148795 |
| PLD3     | -0.6080918 |
| PLD4     | -1.2235856 |
| PLEK2    | -2.017899  |
| PLEKHA6  | -2.6444829 |
| PLEKHA8  | -0.3531852 |
| PLEKHF1  | -0.1948166 |
| PLEKHF2  | -0.5842738 |
| PLEKHG1  | -0.6472323 |
| PLEKHG5  | -1.2051766 |
| PLEKHH3  | -0.5741615 |
| PLEKHJ1  | -0.7455878 |
| PLIN1    | -1.0880997 |
| PLIN3    | -1.0498095 |
| PLIN4    | -1.2378526 |
| PLK1     | -1.1361966 |
| PLK4     | -1.1652753 |
| PLS1     | -0.532794  |
| PLSCR3   | -1.3154902 |
| PLSCR4   | -2.1678576 |
| PLTP     | -0.9186516 |
| PLVAP    | -0.6646147 |
| PLXDC1   | -2.244755  |
| PLXDC2   | -1.2187414 |
| PLXNA4   | -1.4605017 |
| PLXNB1   | -1.6667147 |
| PLXNB2   | -0.5744729 |
| PLXNB3   | -2.525587  |
| PMEL     | -5.740234  |
| PMF1     | -0.4420719 |
| PMM1     | -0.7873616 |

|         |            |
|---------|------------|
| PMM2    | -0.6300321 |
| PMP22   | -0.6334496 |
| PMS1    | -0.6385653 |
| PMS2    | -0.7342134 |
| PMVK    | -0.705894  |
| PNCK    | -0.7882316 |
| PNKP    | -0.4087958 |
| PNMAL2  | -2.3667417 |
| PNPLA6  | -0.5159078 |
| PNPLA7  | -0.7587738 |
| PNPO    | -1.1942096 |
| PNRC1   | -0.3986731 |
| PNRC2   | -0.1825538 |
| POC1A   | -0.7482305 |
| PODN    | -2.6725712 |
| PODXL   | -1.8024061 |
| PODXL2  | -2.0023234 |
| POLA1   | -0.4558082 |
| POLA2   | -0.9846492 |
| POLD1   | -0.8215952 |
| POLD2   | -0.6096258 |
| POLD3   | -0.2569666 |
| POLE    | -0.8196335 |
| POLE2   | -1.0789614 |
| POLE3   | -0.7114601 |
| POLK    | -0.2709646 |
| POLQ    | -0.9802761 |
| POLR1C  | -0.3695669 |
| POLR2A  | -0.5471268 |
| POLR2B  | -0.3444977 |
| POLR2C  | -0.2906017 |
| POLR2D  | -0.6028533 |
| POLR2E  | -0.3616123 |
| POLR2F  | -0.4795332 |
| POLR2J  | -0.379724  |
| POLR2L  | -0.2684197 |
| POLR3B  | -0.2820149 |
| POLR3C  | -0.2549214 |
| POLR3GL | -0.2916598 |
| POLR3H  | -0.4513192 |
| POLR3K  | -0.4432812 |
| POMK    | -0.6735292 |
| POMT1   | -0.9995029 |
| POMT2   | -0.7704582 |
| PON2    | -0.2467547 |



|          |            |
|----------|------------|
| POPDC2   | -1.580934  |
| POPDC3   | -2.4841743 |
| POSTN    | -0.6648428 |
| POT1A    | -0.2756114 |
| POU3F4   | -0.804697  |
| PPA2     | -0.6842189 |
| PPAP2A   | -0.5049019 |
| PPAP2C   | -0.2087812 |
| PPAPDC3  | -1.0935304 |
| PPARG    | -1.49403   |
| PPAT     | -0.6214929 |
| PPBP     | -0.6701722 |
| PPFIA2   | -1.3751159 |
| PPFIA4   | -2.2133443 |
| PPFIBP2  | -0.3760505 |
| PPIB     | -0.5157476 |
| PPIG     | -0.3011074 |
| PPIH     | -0.463759  |
| PPIL1    | -0.8157935 |
| PPIL2    | -0.4287458 |
| PPIL6    | -0.7783315 |
| PPM1A    | -0.4473047 |
| PPM1D    | -0.62045   |
| PPM1E    | -1.4140663 |
| PPM1G    | -0.829536  |
| PPM1L    | -0.9197278 |
| PPME1    | -0.5560174 |
| PPNR     | -0.7043977 |
| PPOX     | -1.5291619 |
| PPP1CA   | -0.402463  |
| PPP1CB   | -0.9441104 |
| PPP1CC   | -0.5342531 |
| PPP1R13L | -0.710577  |
| PPP1R14A | -1.2679877 |
| PPP1R14C | -0.8219872 |
| PPP1R15A | -0.5511446 |
| PPP1R16A | -0.4668994 |
| PPP1R2   | -0.6291251 |
| PPP1R32  | -0.2993321 |
| PPP1R35  | -0.9242449 |
| PPP1R37  | -0.844079  |
| PPP1R3A  | -0.8772347 |
| PPP1R3B  | -0.4257584 |
| PPP1R3C  | -3.7189813 |
| PPP1R7   | -0.5226188 |

|            |            |
|------------|------------|
| PPP1R9A    | -1.4671566 |
| PPP1R9B    | -0.4938388 |
| PPP2CA     | -0.1990027 |
| PPP2R1B    | -0.6113427 |
| PPP2R3C    | -0.337688  |
| PPP2R4     | -1.1564641 |
| PPP2R5B    | -1.0190969 |
| PPP2R5C    | -0.4741263 |
| PPP2R5D    | -0.2772059 |
| PPP2R5E    | -0.5458071 |
| PPP4R1L-PS | -0.5675533 |
| PPP6R1     | -0.5813718 |
| PPP6R2     | -0.4071269 |
| PPT1       | -0.3136849 |
| PQBP1      | -0.2209778 |
| PQLC1      | -1.1021304 |
| PQLC2      | -0.6230793 |
| PQLC3      | -0.9667845 |
| PRADC1     | -1.36761   |
| PRC1       | -1.1077385 |
| PRDM10     | -0.5874271 |
| PRDM16     | -2.1541743 |
| PRDM4      | -0.3132749 |
| PRDX2      | -0.876667  |
| PRDX3      | -1.0873461 |
| PRDX4      | -0.7864313 |
| PRELID1    | -0.20649   |
| PREPL      | -0.356564  |
| PRG2       | -3.022488  |
| PRG3       | -2.4624238 |
| PRG4       | -1.2433124 |
| PRIM1      | -0.780911  |
| PRIM2      | -0.8972025 |
| PRIMPOL    | -0.8926439 |
| PRKAA1     | -0.5129743 |
| PRKAA2     | -1.8367367 |
| PRKAB1     | -0.7451572 |
| PRKAG1     | -1.3644896 |
| PRKAR1B    | -1.5368927 |
| PRKAR2A    | -0.6047211 |
| PRKAR2B    | -1.2271304 |
| PRKCDBP    | -0.63376   |
| PRKDC      | -0.3471293 |
| PRKG1      | -0.608027  |
| PRKRA      | -0.8778095 |

|         |            |
|---------|------------|
| PRKRIP1 | -0.2731433 |
| PRL4A1  | -4.5679026 |
| PRM1    | -0.3375895 |
| PRMT5   | -0.3726015 |
| PRN     | -0.1798074 |
| PROCA1  | -0.7786808 |
| PROKR1  | -1.3366923 |
| PROKR2  | -1.2685087 |
| PROM1   | -0.9738274 |
| PROS1   | -0.5927506 |
| PROSER2 | -0.534204  |
| PROX1   | -1.6889386 |
| PROX2   | -0.7686522 |
| PRPF19  | -0.5130439 |
| PRPF3   | -0.2106881 |
| PRR11   | -0.9623237 |
| PRR12   | -0.8896449 |
| PRR15   | -1.0187793 |
| PRR24   | -0.1917276 |
| PRR5L   | -0.8212142 |
| PRR7    | -1.6741405 |
| PRRC2A  | -0.5383039 |
| PRRC2B  | -0.2166572 |
| PRRG2   | -0.4738188 |
| PRRX1   | -1.0186667 |
| PRRX2   | -1.5335233 |
| PRSS33  | -0.6352623 |
| PRSS34  | -1.2879634 |
| PRSS50  | -2.2632723 |
| PRSS57  | -1.459266  |
| PRTN3   | -1.2007046 |
| PRUNE   | -0.8150621 |
| PRX     | -0.8994217 |
| PSAP    | -1.2549734 |
| PSD     | -0.9215593 |
| PSIP1   | -0.2716069 |
| PSKH1   | -0.7035148 |
| PSMA5   | -0.3083425 |
| PSMB1   | -0.380086  |
| PSMB4   | -0.2003546 |
| PSMB7   | -0.8967128 |
| PSMC1   | -0.1791267 |
| PSMC3   | -0.405952  |
| PSMC3IP | -0.9196487 |
| PSMC4   | -0.3339748 |

|         |            |
|---------|------------|
| PSMC5   | -0.3420391 |
| PSMC6   | -0.2095628 |
| PSMD11  | -0.8418655 |
| PSMD13  | -0.7106304 |
| PSMD14  | -0.3999972 |
| PSMD5   | -0.80055   |
| PSMD6   | -0.2078376 |
| PSMD8   | -0.3658881 |
| PSMD9   | -1.3702207 |
| PSME3   | -0.4199362 |
| PSME4   | -0.3974738 |
| PSMF1   | -0.8979411 |
| PSMG4   | -0.342588  |
| PSPC1   | -0.7149005 |
| PSRC1   | -1.001164  |
| PSTPIP1 | -0.6348419 |
| PTBP1   | -0.532773  |
| PTBP3   | -0.8284354 |
| PTCHD3  | -0.4108884 |
| PTDSS2  | -1.2094488 |
| PTER    | -0.9374564 |
| PTGDS   | -4.5855875 |
| PTGER1  | -1.4271054 |
| PTGES2  | -0.4052115 |
| PTGIS   | -0.5363345 |
| PTGR1   | -1.5568781 |
| PTGR2   | -0.3446178 |
| PTGS1   | -1.5058475 |
| PTH1R   | -2.4096327 |
| PTMA    | -0.285408  |
| PTOV1   | -1.2424784 |
| PTP4A2  | -0.3505211 |
| PTP4A3  | -1.1999316 |
| PTPLA   | -0.5206122 |
| PTPLAD2 | -2.0014098 |
| PTPN14  | -1.0501833 |
| PTPN21  | -0.8653369 |
| PTPN7   | -1.0059967 |
| PTPN9   | -0.3386102 |
| PTPRB   | -1.6822753 |
| PTPRD   | -0.3744237 |
| PTPRE   | -0.2535453 |
| PTPRF   | -1.0505629 |
| PTPRO   | -1.5293264 |
| PTPRS   | -0.3279238 |

|           |            |
|-----------|------------|
| PTPRV     | -0.5912635 |
| PTRF      | -0.9890389 |
| PTRHD1    | -0.4368987 |
| PTS       | -1.2107637 |
| PTTG1     | -1.0046554 |
| PTTG1IP   | -0.4682336 |
| PUF60     | -0.3514996 |
| PUM1      | -0.5681629 |
| PUM2      | -0.2293854 |
| PURG      | -0.6682568 |
| PUS10     | -0.846982  |
| PWWP2A    | -0.4844964 |
| PWWP2B    | -0.4427838 |
| PXMP2     | -0.6950684 |
| PXMP4     | -0.6979828 |
| PXYLP1    | -1.6632445 |
| PYCR1     | -0.4341874 |
| PYCR2     | -0.46032   |
| PYCRL     | -0.609982  |
| PYGB      | -0.3879275 |
| PYGL      | -0.5614801 |
| PYGM      | -0.8819041 |
| PYROXD2   | -1.3609588 |
| PYURF     | -0.561389  |
| QARS      | -0.2551351 |
| QK        | -0.5377436 |
| QPCT      | -1.3898301 |
| QRICH1    | -0.2821021 |
| QSER1     | -0.3836162 |
| R3HCC1    | -0.6402841 |
| R3HDM4    | -0.8901076 |
| R3HDML    | -0.705277  |
| RAB11A    | -0.5716786 |
| RAB11B    | -0.5944495 |
| RAB11FIP5 | -0.9437146 |
| RAB1B     | -0.4653206 |
| RAB24     | -0.256135  |
| RAB27B    | -1.0397477 |
| RAB31     | -0.7564268 |
| RAB34     | -0.6174426 |
| RAB36     | -1.4027019 |
| RAB37     | -0.529913  |
| RAB38     | -0.7649326 |
| RAB39     | -0.7024546 |
| RAB3A     | -0.3135052 |

|          |            |
|----------|------------|
| RAB3B    | -0.8588724 |
| RAB3D    | -1.5275958 |
| RAB3IL1  | -1.4999213 |
| RAB40B   | -1.8746829 |
| RAB42    | -1.7307656 |
| RAB4A    | -1.0829825 |
| RAB5B    | -0.2831712 |
| RAB5C    | -1.8439069 |
| RAB6B    | -0.9917953 |
| RAB8A    | -0.1944218 |
| RABAC1   | -0.2620449 |
| RABGEF1  | -0.3562713 |
| RABGGTB  | -0.2360168 |
| RABL3    | -0.3602977 |
| RABL6    | -0.2749291 |
| RAC1     | -0.3354387 |
| RACGAP1  | -0.5548511 |
| RAD1     | -0.482007  |
| RAD18    | -0.7367935 |
| RAD21    | -0.6954289 |
| RAD23A   | -0.8404634 |
| RAD50    | -0.514564  |
| RAD51    | -0.9814959 |
| RAD51AP1 | -1.3206296 |
| RAD51B   | -0.9407344 |
| RAD52    | -0.3321552 |
| RAD54B   | -0.4531615 |
| RAD54L   | -1.3297334 |
| RAET1E   | -0.5818    |
| RAF1     | -0.2670679 |
| RAG1     | -2.8238451 |
| RAG2     | -2.442539  |
| RALBP1   | -0.7545705 |
| RALGAPA2 | -0.2621563 |
| RALGPS1  | -0.358315  |
| RALY     | -1.6715708 |
| RALYL    | -0.8211949 |
| RAMP1    | -1.2558634 |
| RAMP2    | -1.4212031 |
| RANBP10  | -1.1707144 |
| RANBP2   | -0.3174205 |
| RANBP6   | -0.8525655 |
| RANBP9   | -0.2377563 |
| RANGAP1  | -0.3684378 |
| RANGRF   | -0.5909319 |

|          |            |
|----------|------------|
| RAP1A    | -0.3432241 |
| RAP1GAP  | -0.6678143 |
| RAPGEFL1 | -2.042456  |
| RARA     | -0.6537728 |
| RARB     | -0.5883689 |
| RARG     | -0.8248377 |
| RASA3    | -0.2840691 |
| RASAL1   | -0.4023898 |
| RASD2    | -0.9604473 |
| RASGEF1C | -1.0222385 |
| RASGRP2  | -0.6598115 |
| RASL11A  | -2.4389422 |
| RASL11B  | -0.5463064 |
| RASL12   | -0.8116558 |
| RASSF4   | -0.3042069 |
| RASSF7   | -1.1132622 |
| RASSF9   | -0.8870459 |
| RB1      | -0.9056368 |
| RBBP4    | -0.27702   |
| RBBP5    | -0.4462862 |
| RBBP7    | -0.4794121 |
| RBBP8    | -0.401051  |
| RBBP9    | -0.8426511 |
| RBFA     | -0.863327  |
| RBFOX1   | -0.6743507 |
| RBFOX3   | -0.5665269 |
| RBKS     | -0.6557722 |
| RBL1     | -0.6087556 |
| RBL2     | -0.8137531 |
| RBM15B   | -0.2364969 |
| RBM22    | -0.5795884 |
| RBM24    | -2.0495567 |
| RBM3     | -1.3635192 |
| RBM38    | -1.3758407 |
| RBM42    | -0.2401438 |
| RBM45    | -0.3615947 |
| RBM7     | -0.3119655 |
| RBM8A    | -0.4503117 |
| RBMS2    | -0.2446232 |
| RBMX     | -0.2863855 |
| RBMX2    | -0.7293043 |
| RBP1     | -0.527257  |
| RBP4     | -1.8676729 |
| RBP7     | -3.9609554 |
| BPMS     | -0.2622361 |

|        |            |
|--------|------------|
| RC3H1  | -0.2115235 |
| RCAN1  | -0.8159032 |
| RCAN2  | -1.2749228 |
| RCAN3  | -1.3541455 |
| RCBTB2 | -0.6387091 |
| RCC1   | -0.3567019 |
| RCC2   | -0.242867  |
| RCHY1  | -0.6469288 |
| RCN2   | -0.294785  |
| RCN3   | -1.1615438 |
| RCOR1  | -0.4027734 |
| RCOR2  | -0.4609065 |
| RDX    | -0.7911682 |
| REC114 | -0.6617086 |
| RECQL  | -0.5102749 |
| RECQL4 | -1.2998309 |
| RECQL5 | -0.4940875 |
| REDRUM | -1.5803447 |
| REEP1  | -0.7134526 |
| REEP2  | -1.101753  |
| REEP4  | -0.9337745 |
| REEP5  | -0.8795681 |
| REEP6  | -1.4947729 |
| RELL1  | -0.9010887 |
| RELL2  | -2.4583914 |
| RELT   | -0.6055522 |
| REM1   | -0.6720576 |
| REN2   | -1.0086262 |
| REPS2  | -1.7417812 |
| RETN   | -2.4526742 |
| RETNLA | -5.525751  |
| RETSAT | -1.2163453 |
| REV1   | -0.687978  |
| REXO2  | -0.3912482 |
| RFC1   | -0.8539872 |
| RFC2   | -0.716989  |
| RFC3   | -0.688509  |
| RFC5   | -0.5864091 |
| RFK    | -0.6787725 |
| RFNG   | -0.4113588 |
| RFWD3  | -0.7437182 |
| RFX1   | -0.319921  |
| RFX2   | -2.10298   |
| RFXANK | -0.5255876 |
| RGAG4  | -0.4194493 |



|          |            |
|----------|------------|
| RGCC     | -1.237719  |
| RGL2     | -0.2560787 |
| RGMB     | -0.3696196 |
| RGS10    | -1.0271173 |
| RGS12    | -1.5149403 |
| RGS14    | -0.2535296 |
| RGS18    | -0.5604839 |
| RGS2     | -1.1903834 |
| RGS3     | -0.6043434 |
| RHAG     | -1.0182128 |
| RHBDD3   | -0.6077919 |
| RHBDL1   | -0.4650459 |
| RHBDL3   | -1.2578213 |
| RHD      | -1.0088234 |
| RHNO1    | -0.6369362 |
| RHOA     | -0.2541094 |
| RHOD     | -1.0471487 |
| RHOG     | -0.3921409 |
| RHOJ     | -0.1933289 |
| RHOT2    | -0.486671  |
| RHOX2H   | -2.5079315 |
| RHPN2    | -0.9466941 |
| RIBC1    | -0.3789289 |
| RICTOR   | -0.3558307 |
| RIIAD1   | -0.6434145 |
| RILP     | -0.341115  |
| RIMBP3   | -0.7871893 |
| RIMS3    | -2.3636162 |
| RIN2     | -0.9217169 |
| RING1    | -0.3951249 |
| RINT1    | -0.7055197 |
| RIOK1    | -0.3862581 |
| RIOK3    | -0.479104  |
| RIPPLY3  | -0.6045089 |
| RIT1     | -0.7494774 |
| RMDN1    | -0.5061913 |
| RMDN3    | -0.4819932 |
| RMI1     | -0.4857287 |
| RMND5B   | -0.7657251 |
| RNASE12  | -1.7047765 |
| RNASE2A  | -2.30785   |
| RNASE4   | -0.4995747 |
| RNASE6   | -0.6423383 |
| RNASEH2A | -0.884676  |
| RNASEH2B | -0.9266763 |

|          |            |
|----------|------------|
| RNASEH2C | -0.7387424 |
| RNASEK   | -0.613596  |
| RNASEL   | -0.9993997 |
| RND2     | -0.4989169 |
| RND3     | -0.536232  |
| RNF10    | -0.9289155 |
| RNF11    | -0.9015107 |
| RNF123   | -1.366498  |
| RNF126   | -0.3153825 |
| RNF128   | -0.5598321 |
| RNF130   | -0.5508595 |
| RNF139   | -0.4214053 |
| RNF144B  | -1.9226539 |
| RNF150   | -0.791873  |
| RNF152   | -2.7087212 |
| RNF165   | -0.4593542 |
| RNF166   | -0.8064132 |
| RNF167   | -0.4556541 |
| RNF168   | -0.408998  |
| RNF181   | -0.3422766 |
| RNF187   | -0.7823124 |
| RNF207   | -0.6194718 |
| RNF208   | -1.7749882 |
| RNF212   | -1.5950322 |
| RNF26    | -0.9811401 |
| RNF38    | -0.3765545 |
| RNF39    | -0.484416  |
| RNF4     | -0.2780371 |
| RNF40    | -0.4916325 |
| RNF43    | -0.5554962 |
| RNF5     | -0.5776744 |
| RNF7     | -0.2509093 |
| RNF8     | -0.3314829 |
| RNH1     | -0.5220418 |
| RNPEP    | -1.088892  |
| RNPS1    | -0.2427878 |
| RNU12    | -0.3896499 |
| ROBO2    | -1.6638498 |
| ROBO3    | -0.5871396 |
| ROGDI    | -0.2597709 |
| ROM1     | -0.7154784 |
| ROMO1    | -0.2907367 |
| ROPN1L   | -0.9220793 |
| RORA     | -0.4244909 |
| RP9      | -0.2789784 |

|           |            |
|-----------|------------|
| RPA1      | -0.7043099 |
| RPA2      | -1.107914  |
| RPA3      | -0.7765613 |
| RPAIN     | -0.4462938 |
| RPAP2     | -0.3461685 |
| RPGR      | -0.2795761 |
| RPGRIP1L  | -0.7606294 |
| RPH3AL    | -0.5707817 |
| RPL21     | -0.3233562 |
| RPL23A    | -0.2165737 |
| RPL34-PS1 | -0.2460303 |
| RPP21     | -0.3375063 |
| RPP25L    | -0.4185944 |
| RPP30     | -0.4459903 |
| RPRD1B    | -0.4855852 |
| RPRM      | -1.5410011 |
| RPS2      | -0.6880412 |
| RPS27L    | -0.3404727 |
| RPS6KA1   | -0.5770783 |
| RPS6KA5   | -0.6779969 |
| RPS6KB2   | -0.4807096 |
| RPUSD1    | -0.9755006 |
| RPUSD3    | -0.3403063 |
| RPUSD4    | -0.4466705 |
| RQCD1     | -1.0891929 |
| RRAGA     | -0.8872156 |
| RRAGD     | -0.6574011 |
| RRM1      | -1.256269  |
| RRM2      | -1.619338  |
| RSF1      | -0.3022475 |
| RSPH1     | -0.7817354 |
| RSPH3B    | -0.2443914 |
| RSPH9     | -1.2675288 |
| RSPO1     | -2.425671  |
| RSRP1     | -0.5862556 |
| RSU1      | -0.3432527 |
| RTCA      | -0.3634472 |
| RTCL1     | -0.3769288 |
| RTF1      | -0.3257732 |
| RTN2      | -1.2896287 |
| RTN3      | -0.9052458 |
| RTN4R     | -2.019495  |
| RTN4RL1   | -2.08471   |
| RTP3      | -0.6690781 |
| RUFY4     | -0.9659252 |

|         |            |
|---------|------------|
| RUNDC3A | -0.6339989 |
| RUNX1T1 | -1.5007064 |
| RUNX2   | -0.1855607 |
| RUVBL1  | -0.2277494 |
| RUVBL2  | -0.3145919 |
| RWDD2B  | -0.6620808 |
| RXRA    | -0.7094801 |
| RYK     | -1.35887   |
| RYR1    | -0.7334771 |
| S100A1  | -0.8500128 |
| S100A10 | -0.9167323 |
| S100A11 | -0.7380767 |
| S100A16 | -1.0482235 |
| S100B   | -4.566986  |
| S100Z   | -1.0129545 |
| S1PR4   | -0.3196588 |
| S1PR5   | -2.0413187 |
| SAAL1   | -0.5720749 |
| SAE1    | -0.3593292 |
| SALL2   | -1.2138233 |
| SAMD1   | -0.4681859 |
| SAMD11  | -0.7446852 |
| SAMD14  | -2.030344  |
| SAMD3   | -0.4528558 |
| SAMD5   | -1.2098932 |
| SAMM50  | -0.7618685 |
| SAP30BP | -0.2446904 |
| SAPCD2  | -0.9243107 |
| SARDH   | -1.1017928 |
| SARS    | -0.3651118 |
| SARS2   | -0.6770988 |
| SASS6   | -0.45099   |
| SAT1    | -0.860405  |
| SAT2    | -1.3443158 |
| SBK1    | -0.3987098 |
| SBSN    | -0.6694031 |
| SCAF4   | -0.3986273 |
| SCAMP2  | -0.5303636 |
| SCAMP5  | -1.913286  |
| SCAND1  | -0.394587  |
| SCAP    | -0.1783528 |
| SCARB1  | -0.9707441 |
| SCARB2  | -0.3427882 |
| SCCPDH  | -0.4667363 |
| SCD2    | -0.883574  |

|          |            |
|----------|------------|
| SCG5     | -0.9556484 |
| SCGB1A1  | -0.5864103 |
| SCGB2B20 | -0.7537398 |
| SCLT1    | -0.5432854 |
| SCLY     | -0.7783513 |
| SCMH1    | -1.1369247 |
| SCML2    | -1.1425862 |
| SCN1B    | -1.5357974 |
| SCN2B    | -0.2853427 |
| SCNM1    | -0.5039215 |
| SCNN1A   | -2.8584108 |
| SCOC     | -1.0366216 |
| SCP2     | -0.3587441 |
| SCRN1    | -2.6456532 |
| SCRN3    | -1.0904393 |
| SCUBE1   | -1.4749007 |
| SCUBE2   | -0.5162158 |
| SDC1     | -0.3164272 |
| SDC2     | -1.1537464 |
| SDC3     | -0.9539027 |
| SDCCAG3  | -0.1934581 |
| SDHB     | -0.2270298 |
| SDHC     | -0.3282743 |
| SDHD     | -0.5185499 |
| SDK2     | -1.1206534 |
| SDPR     | -1.6547728 |
| SDSL     | -0.7431269 |
| SEC11C   | -0.611948  |
| SEC14L1  | -0.5963044 |
| SEC14L2  | -2.1768408 |
| SEC16B   | -2.6852112 |
| SEC23A   | -0.5664129 |
| SEC23IP  | -0.3397818 |
| SEC31B   | -0.586138  |
| SECTM1A  | -3.003244  |
| SEH1L    | -0.3205781 |
| SELENBP1 | -1.7531004 |
| SELM     | -1.3540025 |
| SELO     | -0.5152078 |
| SEMA3B   | -0.7122662 |
| SEMA3C   | -0.1845498 |
| SEMA3D   | -0.8653743 |
| SEMA4B   | -0.3658271 |
| SEMA4G   | -1.2290771 |
| SEMA6A   | -1.1932225 |

|           |            |
|-----------|------------|
| SENP1     | -0.4800491 |
| SENP3     | -0.2536969 |
| SEPHS1    | -0.634125  |
| SEPP1     | -1.2649026 |
| SEPSECS   | -0.5882926 |
| SERF1     | -0.4791722 |
| SERF2     | -0.3592224 |
| SERHL     | -0.8314562 |
| SERINC3   | -0.271894  |
| SERINC5   | -0.913383  |
| SERP2     | -0.5833638 |
| SERPINA3A | -2.0114684 |
| SERPINA3H | -1.7258503 |
| SERPINB10 | -1.294455  |
| SERPINB2  | -0.7313197 |
| SERPINB3C | -0.5972114 |
| SERPINB6A | -0.4184494 |
| SERPINB6C | -0.5032554 |
| SERPINB8  | -0.246695  |
| SERPINF1  | -0.9744153 |
| SERPINF2  | -0.3842244 |
| SERTAD2   | -0.5276208 |
| SERTAD4   | -2.8860068 |
| SETD1A    | -0.6071267 |
| SETD1B    | -0.2270846 |
| SETD5     | -0.8163714 |
| SETD6     | -0.194622  |
| SETD8     | -0.5575576 |
| SF1       | -0.2215858 |
| SF3B2     | -0.5056486 |
| SF3B4     | -0.2762418 |
| SF3B5     | -0.4585686 |
| SF3B6     | -0.3144507 |
| SFMBT1    | -0.7769704 |
| SFRP1     | -1.4321539 |
| SFRP2     | -1.9596114 |
| SFRP4     | -2.344123  |
| SFTPB     | -0.825645  |
| SFTPC     | -1.3242106 |
| SFXN1     | -0.2982688 |
| SFXN3     | -0.6996908 |
| SFXN5     | -0.2929423 |
| SGCE      | -0.5519776 |
| SGK3      | -0.5003381 |
| SGOL1     | -0.8727651 |

|          |            |
|----------|------------|
| SGOL2    | -1.397064  |
| SGPP1    | -0.313201  |
| SGSH     | -0.2216806 |
| SGTA     | -0.2042413 |
| SH2B1    | -0.2882705 |
| SH2D1B1  | -2.3638833 |
| SH2D3C   | -0.2497292 |
| SH2D4A   | -2.898794  |
| SH2D5    | -0.7370746 |
| SH3BGR   | -0.2817996 |
| SH3BGRL  | -0.3405943 |
| SH3BGRL3 | -0.3045759 |
| SH3BP1   | -0.386879  |
| SH3BP5L  | -0.260149  |
| SH3D19   | -1.2289908 |
| SH3D21   | -0.174367  |
| SH3GLB1  | -0.3630505 |
| SH3GLB2  | -0.4749446 |
| SH3RF2   | -3.1218877 |
| SH3TC2   | -1.9169221 |
| SH3YL1   | -0.7259927 |
| SHANK1   | -0.6446099 |
| SHANK3   | -0.5826643 |
| SHC1     | -0.6657839 |
| SHCBP1   | -0.6321821 |
| SHF      | -0.8894532 |
| SHISA2   | -0.4925883 |
| SHISA4   | -0.8230093 |
| SHISA6   | -2.0465238 |
| SHISA9   | -0.83093   |
| SHKBP1   | -0.5617213 |
| SHMT2    | -0.4217544 |
| SHOC2    | -0.6368375 |
| SHPK     | -0.6245425 |
| SIAE     | -0.5502353 |
| SIAH1A   | -0.5797114 |
| SIAH1B   | -0.7183185 |
| SIAH3    | -0.279496  |
| SIDT2    | -0.3719287 |
| SIGLEC5  | -2.274864  |
| SIL1     | -0.2831154 |
| SIRPA    | -0.4718933 |
| SIRPB1A  | -0.5739174 |
| SIRPB1B  | -0.6512504 |
| SIRT2    | -0.513433  |

|          |            |
|----------|------------|
| SIRT3    | -0.6885037 |
| SIRT4    | -0.2711663 |
| SIVA1    | -1.0814614 |
| SIX5     | -1.0186381 |
| SKA1     | -0.7279902 |
| SKA2     | -1.6817067 |
| SKA3     | -0.6921887 |
| SKP1A    | -0.3352323 |
| SKP2     | -0.805892  |
| SLAMF8   | -0.6170473 |
| SLBP     | -1.4183087 |
| SLC11A2  | -0.6030865 |
| SLC12A7  | -0.2804599 |
| SLC12A9  | -0.426703  |
| SLC13A2  | -2.0369143 |
| SLC13A3  | -3.0349572 |
| SLC14A1  | -1.110167  |
| SLC16A10 | -0.6812549 |
| SLC16A6  | -0.3071175 |
| SLC16A9  | -1.1256695 |
| SLC18B1  | -0.9415152 |
| SLC19A1  | -0.3359141 |
| SLC19A2  | -0.8709555 |
| SLC1A1   | -0.9400499 |
| SLC1A5   | -0.3504067 |
| SLC20A1  | -0.4249973 |
| SLC22A17 | -1.1769357 |
| SLC22A18 | -1.0287788 |
| SLC22A23 | -1.3585954 |
| SLC22A4  | -1.6764264 |
| SLC22A7  | -2.1372843 |
| SLC24A3  | -0.2324395 |
| SLC24A5  | -0.6962447 |
| SLC25A1  | -0.9771524 |
| SLC25A12 | -0.4661598 |
| SLC25A13 | -0.2352791 |
| SLC25A16 | -1.0048392 |
| SLC25A21 | -1.5349169 |
| SLC25A24 | -0.4906359 |
| SLC25A30 | -0.4539123 |
| SLC25A31 | -0.8571272 |
| SLC25A34 | -0.8480332 |
| SLC25A35 | -1.4344318 |
| SLC25A37 | -1.4521337 |
| SLC25A38 | -1.1234684 |



|          |            |
|----------|------------|
| SLC25A39 | -0.9829106 |
| SLC25A40 | -0.4010322 |
| SLC25A42 | -0.7045751 |
| SLC25A44 | -0.3476062 |
| SLC25A45 | -0.7678433 |
| SLC25A47 | -0.7062516 |
| SLC25A5  | -0.3861804 |
| SLC25A51 | -1.2391443 |
| SLC27A1  | -1.3158162 |
| SLC27A3  | -1.032352  |
| SLC27A4  | -0.1871078 |
| SLC29A1  | -1.1791253 |
| SLC29A3  | -0.8555653 |
| SLC29A4  | -1.814347  |
| SLC2A3   | -0.7033477 |
| SLC2A4   | -1.5833135 |
| SLC2A8   | -1.1773152 |
| SLC30A1  | -0.5825753 |
| SLC30A10 | -2.2239604 |
| SLC30A9  | -0.9997988 |
| SLC31A1  | -0.3906488 |
| SLC32A1  | -0.4739468 |
| SLC33A1  | -0.2706757 |
| SLC35A4  | -0.6170802 |
| SLC35B2  | -0.7790527 |
| SLC35B4  | -0.4645257 |
| SLC35C2  | -0.4738073 |
| SLC35D1  | -0.9019983 |
| SLC35D3  | -0.2578709 |
| SLC35F6  | -0.6289067 |
| SLC35G1  | -0.5747476 |
| SLC36A4  | -0.2694893 |
| SLC37A2  | -0.647404  |
| SLC37A4  | -0.2749052 |
| SLC38A5  | -1.5647283 |
| SLC38A6  | -0.4221771 |
| SLC38A8  | -1.2123382 |
| SLC38A9  | -0.331511  |
| SLC39A8  | -0.5866838 |
| SLC3A2   | -0.4295864 |
| SLC40A1  | -4.010758  |
| SLC41A3  | -1.2413483 |
| SLC43A1  | -0.8203096 |
| SLC43A2  | -0.9423919 |
| SLC43A3  | -0.2856183 |

|            |            |
|------------|------------|
| SLC44A1    | -0.5847383 |
| SLC44A5    | -0.6367946 |
| SLC45A2    | -2.8657064 |
| SLC46A1    | -1.2418673 |
| SLC46A3    | -0.7166858 |
| SLC48A1    | -1.3607678 |
| SLC4A1     | -1.1962247 |
| SLC4A3     | -0.6722281 |
| SLC4A5     | -0.5480919 |
| SLC4A9     | -0.3729069 |
| SLC51A     | -2.375247  |
| SLC5A2     | -1.5379415 |
| SLC6A12    | -2.053686  |
| SLC6A13    | -1.5168085 |
| SLC6A20A   | -1.9772687 |
| SLC6A3     | -0.5174487 |
| SLC6A4     | -0.4332576 |
| SLC6A6     | -0.2495475 |
| SLC6A8     | -0.7505188 |
| SLC6A9     | -1.1457486 |
| SLC7A4     | -1.6291101 |
| SLC7A8     | -0.5175314 |
| SLC8A2     | -0.7039053 |
| SLC9A3R1   | -0.453599  |
| SLC9A3R2   | -2.342679  |
| SLC9A9     | -1.5082529 |
| SLCO2A1    | -0.3883128 |
| SLCO2B1    | -1.3458006 |
| SLFN14     | -1.2667267 |
| SLIT3      | -1.0343249 |
| SLITRK6    | -1.8403912 |
| SLURP1     | -1.7641497 |
| SLX4       | -0.493238  |
| SMAD6      | -0.4680321 |
| SMAP1      | -0.386538  |
| SMARCA1    | -1.1643224 |
| SMARCA2    | -0.619802  |
| SMARCA5-PS | -0.4867606 |
| SMARCAL1   | -0.2783012 |
| SMARCC2    | -1.2428017 |
| SMARCD1    | -0.6534915 |
| SMARCD2    | -0.7426801 |
| SMARCD3    | -1.9799426 |
| SMC1A      | -0.4623008 |
| SMC2       | -0.8963537 |

|         |            |
|---------|------------|
| SMC3    | -0.4449143 |
| SMC4    | -0.7912302 |
| SMC6    | -0.4077039 |
| SMCO4   | -0.5648365 |
| SMEK1   | -0.5198135 |
| SMG5    | -0.5809226 |
| SMG6    | -0.39323   |
| SMG7    | -0.2607007 |
| SMG9    | -0.3790131 |
| SMIM1   | -2.1671152 |
| SMIM11  | -0.3417373 |
| SMIM12  | -0.3318358 |
| SMIM14  | -0.6496759 |
| SMIM24  | -0.7867818 |
| SMIM4   | -1.3703098 |
| SMIM5   | -1.570149  |
| SMIM6   | -1.1763089 |
| SMIM8   | -0.5152931 |
| SMN1    | -0.2715368 |
| SMNDC1  | -0.5100412 |
| SMO     | -1.1144414 |
| SMOX    | -1.1851239 |
| SMPD1   | -0.8140206 |
| SMPD2   | -0.5327077 |
| SMPD3   | -1.0394306 |
| SMPD4   | -0.9854698 |
| SMPD5   | -0.4009471 |
| SMPDL3A | -0.661129  |
| SMTNL2  | -1.4567707 |
| SNAI2   | -1.161402  |
| SNAP47  | -0.5995703 |
| SNAPC2  | -0.4917402 |
| SNAPIN  | -0.2204876 |
| SNCA    | -1.455946  |
| SNCG    | -1.7149813 |
| SND1    | -0.4264603 |
| SNED1   | -2.9774005 |
| SNF8    | -0.2877464 |
| SNHG10  | -0.4536843 |
| SNHG3   | -0.7652783 |
| SNHG5   | -0.4522796 |
| SNIP1   | -0.4166665 |
| SNN     | -0.3836427 |
| SNPH    | -1.0569963 |
| SNRNP25 | -1.1009474 |

|         |            |
|---------|------------|
| SNRNP40 | -0.7198329 |
| SNRNP70 | -0.3279681 |
| SNRPB   | -0.2388339 |
| SNRPB2  | -0.4988761 |
| SNRPD2  | -0.3420968 |
| SNRPD3  | -0.8048101 |
| SNRPE   | -0.2071214 |
| SNRPF   | -0.315228  |
| SNRPG   | -0.2299676 |
| SNRPN   | -1.4017515 |
| SNX15   | -1.0051599 |
| SNX17   | -0.3188105 |
| SNX21   | -1.603867  |
| SNX22   | -1.6435375 |
| SNX24   | -0.7121513 |
| SNX30   | -0.2270598 |
| SNX32   | -1.0766916 |
| SNX33   | -0.773694  |
| SOD1    | -0.6697187 |
| SORD    | -0.4896307 |
| SORT1   | -1.0581806 |
| SOWAHA  | -1.3410697 |
| SOX10   | -3.5877094 |
| SOX12   | -1.1181493 |
| SOX15   | -0.6260648 |
| SOX17   | -1.8379743 |
| SOX18   | -2.4309952 |
| SOX4    | -1.5124056 |
| SOX5IT  | -0.5634489 |
| SOX6    | -1.7559474 |
| SP1     | -0.6096301 |
| SP3OS   | -0.3430638 |
| SP4     | -0.5594645 |
| SPA17   | -1.1839781 |
| SPACA1  | -0.4799895 |
| SPAG5   | -1.2906561 |
| SPARC   | -0.4201574 |
| SPARCL1 | -0.323266  |
| SPATA24 | -1.0529637 |
| SPATA6  | -0.3320165 |
| SPC24   | -1.1863694 |
| SPC25   | -0.5704393 |
| SPDL1   | -0.995995  |
| SPECC1  | -0.5837021 |
| SPECC1L | -0.2271137 |

|          |            |
|----------|------------|
| SPEER4C  | -0.8340125 |
| SPEG     | -0.948838  |
| SPG21    | -0.3043418 |
| SPHK1    | -0.6330981 |
| SPIN2C   | -0.9195461 |
| SPINK2   | -2.3582902 |
| SPINK7   | -0.8399794 |
| SPINT1   | -1.0451059 |
| SPIRE1   | -1.738091  |
| SPN      | -0.6253371 |
| SPNS2    | -0.952539  |
| SPNS3    | -1.0707073 |
| SPON2    | -3.5474305 |
| SPOP     | -0.2543416 |
| SPOPL    | -0.2844787 |
| SPPL2B   | -0.9992609 |
| SPPL3    | -0.6534843 |
| SPR      | -0.8161669 |
| SPRY4    | -0.5819664 |
| SPRYD3   | -0.8231049 |
| SPRYD4   | -0.5414815 |
| SPSB2    | -0.3833075 |
| SPSB3    | -0.7198954 |
| SPTA1    | -1.2141647 |
| SPTB     | -0.6905453 |
| SPTBN5   | -0.2854478 |
| SPTSSA   | -0.2007074 |
| SQLE     | -0.4129653 |
| SRBD1    | -0.3141079 |
| SRCRB4D  | -0.2912183 |
| SRD5A1   | -1.2672768 |
| SRD5A3   | -0.3702498 |
| SREBF1   | -0.4652722 |
| SREBF2   | -0.477468  |
| SREK1IP1 | -0.5719705 |
| SRGAP2   | -0.2480736 |
| SRGAP3   | -1.2308371 |
| SRP9     | -0.4378834 |
| SRPK3    | -0.3233366 |
| SRPX     | -0.4829347 |
| SRPX2    | -0.7485142 |
| SRR      | -0.7601404 |
| SRRD     | -0.4554629 |
| SRRM1    | -0.3200154 |
| SRSF1    | -0.4434257 |

|            |            |
|------------|------------|
| SRSF10     | -0.3193107 |
| SRSF2      | -0.8368082 |
| SRSF3      | -0.3858089 |
| SRSF9      | -0.5564523 |
| SRXN1      | -0.8712339 |
| SSBP2      | -0.6606197 |
| SSBP3      | -1.0224519 |
| SSBP4      | -0.7711129 |
| SSH1       | -0.5662191 |
| SSNA1      | -1.2777758 |
| SSPN       | -1.3200188 |
| SSR4       | -0.2652259 |
| SSRP1      | -0.3701139 |
| SSSCA1     | -0.2408133 |
| SSX2IP     | -1.3832054 |
| SSXB6      | -0.8931925 |
| ST18       | -1.3743277 |
| ST3GAL2    | -0.5122814 |
| ST3GAL3    | -0.3296089 |
| ST3GAL5    | -1.1711078 |
| ST3GAL6    | -0.9634066 |
| ST5        | -1.6343026 |
| ST6GAL2    | -0.330595  |
| ST6GALNAC5 | -0.7907214 |
| ST6GALNAC6 | -0.4938459 |
| ST7        | -0.4242959 |
| STAB2      | -1.6944394 |
| STAC2      | -0.6239288 |
| STAG1      | -0.5536914 |
| STAMBPL1   | -0.3234363 |
| STAR       | -1.3129072 |
| STARD10    | -2.0743442 |
| STARD3NL   | -0.3395996 |
| STARD8     | -2.28456   |
| STAU1      | -0.4121189 |
| STBD1      | -0.5903029 |
| STEAP3     | -1.6255903 |
| STIL       | -1.0031834 |
| STK11      | -0.71311   |
| STK16      | -0.8234086 |
| STK25      | -0.8478456 |
| STK3       | -0.5531182 |
| STK32C     | -1.5610638 |
| STK38L     | -0.2672615 |
| STMN1      | -1.0562091 |

|          |            |
|----------|------------|
| STMN2    | -1.7706404 |
| STOM     | -1.8391862 |
| STOML2   | -0.386199  |
| STON2    | -0.7612445 |
| STOX1    | -1.4888673 |
| STRA13   | -0.7056212 |
| STRADB   | -0.9312453 |
| STRAP    | -0.5447426 |
| STRBP    | -0.6414175 |
| STRN     | -0.4219022 |
| STRN4    | -0.2979722 |
| STS      | -0.8550711 |
| STT3A    | -0.5215955 |
| STUB1    | -0.5421629 |
| STX17    | -0.8713241 |
| STX2     | -1.3010669 |
| STX3     | -1.3121808 |
| STXBP2   | -0.3329434 |
| STXBP4   | -0.2542782 |
| STXBP6   | -1.4000325 |
| SUCLA2   | -0.2852941 |
| SUCLG1   | -0.4105034 |
| SUCLG2   | -0.3443818 |
| SUCNR1   | -0.2883182 |
| SUDS3    | -1.077558  |
| SUGP1    | -0.3840876 |
| SULF2    | -1.0407162 |
| SULT1A1  | -0.4187889 |
| SULT5A1  | -0.7212415 |
| SUMF1    | -0.5069599 |
| SUMF2    | -0.6391842 |
| SUMO3    | -0.3800035 |
| SUN1     | -0.6072836 |
| SUOX     | -0.8959441 |
| SUPT16   | -1.4059854 |
| SUPT7L   | -1.5417168 |
| SURF1    | -0.2884836 |
| SUV39H2  | -0.3276672 |
| SUV420H2 | -0.8856597 |
| SUZ12    | -0.3797708 |
| SVEP1    | -0.9698682 |
| SVIP     | -1.8546572 |
| SWAP70   | -0.4069457 |
| SWSAP1   | -0.4531815 |
| SYCE1    | -1.9744396 |

|           |            |
|-----------|------------|
| SYCE2     | -1.2127867 |
| SYCP1-PS1 | -3.324686  |
| SYDE2     | -0.6501217 |
| SYNC      | -1.338078  |
| SYNE1     | -1.4291222 |
| SYNE3     | -1.8728857 |
| SYNGR1    | -1.6986673 |
| SYNGR4    | -1.333503  |
| SYNJ2     | -0.370012  |
| SYNM      | -1.7279105 |
| SYNPO2    | -0.2609327 |
| SYNRG     | -0.2688551 |
| SYS1      | -0.2596726 |
| SYT15     | -1.8702707 |
| SYT3      | -0.8101831 |
| SYT5      | -0.9377196 |
| SYTL1     | -1.5148599 |
| SYTL2     | -1.0991182 |
| SYTL4     | -0.6060009 |
| TAAR3     | -10.081129 |
| TAB1      | -0.9211865 |
| TAB3      | -0.8282819 |
| TAC2      | -0.8574271 |
| TAC4      | -1.7557607 |
| TACC1     | -0.6671362 |
| TACC2     | -0.8059924 |
| TACC3     | -0.9738007 |
| TAF10     | -0.4417038 |
| TAF11     | -0.3554707 |
| TAF12     | -0.4780006 |
| TAF15     | -1.4430256 |
| TAF1C     | -0.3553834 |
| TAF2      | -0.3406844 |
| TAF3      | -0.2582703 |
| TAF5      | -0.7735825 |
| TAF5L     | -0.5463882 |
| TAF6L     | -0.8148379 |
| TAF9      | -0.8887296 |
| TAF9B     | -0.6137776 |
| TAL1      | -1.3533163 |
| TALDO1    | -0.6934643 |
| TAMM41    | -0.7840505 |
| TANGO2    | -0.8148489 |
| TAOK2     | -0.382194  |
| TAOK3     | -0.7767191 |



|          |            |
|----------|------------|
| TAPT1    | -1.0776186 |
| TARSL2   | -0.9844756 |
| TAS2R109 | -0.3049769 |
| TATDN2   | -1.8213778 |
| TATDN3   | -0.8909922 |
| TBC1D10B | -0.1762753 |
| TBC1D12  | -0.7114899 |
| TBC1D13  | -0.518693  |
| TBC1D16  | -0.2478433 |
| TBC1D17  | -0.238379  |
| TBC1D22A | -0.5227337 |
| TBC1D24  | -1.4378712 |
| TBC1D31  | -0.8157263 |
| TBC1D5   | -0.2461929 |
| TBC1D7   | -1.05826   |
| TBCCD1   | -0.6588993 |
| TBCD     | -0.6920881 |
| TBCEL    | -0.9641342 |
| TBKBP1   | -0.2377462 |
| TBL1XR1  | -0.4526167 |
| TBRG4    | -0.2980228 |
| TBX2     | -1.9497604 |
| TBXA2R   | -1.3308883 |
| TBXAS1   | -1.8658981 |
| TCEA1    | -0.4499879 |
| TCEA3    | -2.1018507 |
| TCEAL1   | -2.1839907 |
| TCEAL3   | -0.6709778 |
| TCEAL5   | -1.6952281 |
| TCEAL6   | -0.7394085 |
| TCEAL7   | -0.5815222 |
| TCEAL8   | -1.1215239 |
| TCEB2    | -0.2868762 |
| TCEB3    | -0.6803865 |
| TCERG1   | -0.5424867 |
| TCF15    | -1.7305562 |
| TCF19    | -1.0354886 |
| TCF20    | -0.3547549 |
| TCF21    | -3.1142938 |
| TCF23    | -1.6455247 |
| TCF3     | -1.178113  |
| TCF7L1   | -1.8855784 |
| TCF7L2   | -0.6431932 |
| TCHH     | -2.550925  |
| TCN2     | -0.1959906 |

|          |            |
|----------|------------|
| TCP1     | -0.4628439 |
| TCP11L2  | -0.9377909 |
| TCTA     | -0.6869772 |
| TCTN1    | -0.493845  |
| TCTN2    | -0.8902471 |
| TDP1     | -0.3878903 |
| TDP2     | -0.3646579 |
| TEAD3    | -0.2772646 |
| TEC      | -0.286778  |
| TECPR2   | -0.6870627 |
| TECR     | -0.9130235 |
| TEF      | -0.497879  |
| TEK      | -2.3542206 |
| TEKT5    | -0.7268195 |
| TEN1     | -0.3642321 |
| TENC1    | -0.7480476 |
| TEP1     | -0.3626285 |
| TESC     | -0.3430691 |
| TESCL    | -1.2998483 |
| TESK2    | -0.4169915 |
| TEX14    | -1.7686479 |
| TEX15    | -0.9706252 |
| TEX40    | -1.3057983 |
| TFB1M    | -0.6074753 |
| TFCP2    | -0.4967892 |
| TFDP1    | -1.1505814 |
| TFDP2    | -1.1132011 |
| TFEB     | -0.464097  |
| TFF1     | -2.2189822 |
| TFIP11   | -0.3021784 |
| TFPI2    | -1.2322176 |
| TFPT     | -0.6915598 |
| TFR2     | -1.3248348 |
| TFRC     | -1.5345249 |
| TGFB1    | -0.6595635 |
| TGFB1I1  | -0.7183948 |
| TGFB2    | -1.1781433 |
| TGFB3    | -0.4442935 |
| TGFBI    | -1.4635239 |
| TGFBR3   | -0.7246618 |
| TGFBRAP1 | -0.6913035 |
| TGM1     | -0.183959  |
| TGM3     | -0.8194361 |
| THAP11   | -0.6316037 |
| THAP4    | -0.2864242 |

|          |            |
|----------|------------|
| THAP6    | -0.4024494 |
| THAP7    | -0.2956853 |
| THBD     | -0.7864704 |
| THBS2    | -1.096142  |
| THEM6    | -1.3304842 |
| THNSL2   | -1.4410815 |
| THOC2    | -0.2090178 |
| THOC6    | -0.514081  |
| THOC7    | -0.5301981 |
| THOP1    | -0.3937755 |
| THRA     | -1.5435147 |
| THRAP3   | -0.3552852 |
| THRB     | -1.2456431 |
| THRSP    | -4.5313473 |
| THSD1    | -2.7705085 |
| THSD7B   | -1.1475222 |
| THTPA    | -0.5790982 |
| THY1     | -0.7955852 |
| TIAL1    | -0.2452889 |
| TIAM1    | -0.9851229 |
| TIAM2    | -1.9947782 |
| TICRR    | -0.8497734 |
| TIE1     | -2.0741858 |
| TIFAB    | -2.9765742 |
| TIGD3    | -1.8611937 |
| TIGD5    | -1.3214102 |
| TIMD4    | -0.960568  |
| TIMELESS | -0.9293132 |
| TIMM13   | -0.5773344 |
| TIMM17B  | -0.2906232 |
| TIMM21   | -0.3507819 |
| TIMM22   | -0.2348576 |
| TIMM44   | -0.3833556 |
| TIMM50   | -0.5077601 |
| TIMM8A1  | -0.2412109 |
| TIMM8B   | -0.6400824 |
| TIMP2    | -0.9463034 |
| TIPIN    | -1.3103771 |
| TIPRL    | -0.4786739 |
| TJP1     | -0.7136219 |
| TJP3     | -0.3265243 |
| TK1      | -1.4824214 |
| TKT      | -0.4999895 |
| TKTL1    | -1.2216885 |
| TLCD1    | -1.4334688 |

|          |            |
|----------|------------|
| TLCD2    | -0.7662878 |
| TLDC1    | -0.351634  |
| TLE2     | -0.824543  |
| TLE6     | -0.819222  |
| TLK1     | -0.6592093 |
| TLR11    | -1.2878277 |
| TLR12    | -0.9472823 |
| TLR13    | -0.423409  |
| TLR4     | -0.3496447 |
| TLR8     | -1.5728579 |
| TLX1     | -2.7466238 |
| TM2D2    | -0.2709975 |
| TM6SF1   | -0.3586779 |
| TM7SF3   | -0.6300764 |
| TM9SF1   | -0.200171  |
| TMBIM4   | -0.3456545 |
| TMBIM6   | -0.5409184 |
| TMC4     | -0.517066  |
| TMC6     | -1.006083  |
| TMC8     | -0.5370469 |
| TMCC2    | -1.1612248 |
| TMCC3    | -0.4206152 |
| TMCO1    | -0.4260092 |
| TMCO6    | -0.4188228 |
| TMED1    | -0.4645653 |
| TMED2    | -0.526557  |
| TMED3    | -0.3056831 |
| TMED4    | -0.4887548 |
| TMEM100  | -1.0341306 |
| TMEM101  | -0.3436675 |
| TMEM104  | -0.9557467 |
| TMEM106A | -0.2866488 |
| TMEM106B | -0.2386704 |
| TMEM106C | -1.0757852 |
| TMEM107  | -0.8963804 |
| TMEM109  | -0.4138489 |
| TMEM110  | -0.2013054 |
| TMEM115  | -0.4523592 |
| TMEM120B | -1.1014252 |
| TMEM129  | -0.5283799 |
| TMEM132A | -1.4036493 |
| TMEM134  | -0.7686629 |
| TMEM136  | -1.4017313 |
| TMEM138  | -1.1244533 |
| TMEM141  | -1.6348958 |

|          |            |
|----------|------------|
| TMEM144  | -1.3724704 |
| TMEM147  | -0.4257336 |
| TMEM14A  | -0.3126791 |
| TMEM14C  | -1.331522  |
| TMEM150B | -1.3279662 |
| TMEM154  | -0.4770124 |
| TMEM160  | -0.6287775 |
| TMEM164  | -0.3186278 |
| TMEM165  | -0.2823668 |
| TMEM170  | -0.5434165 |
| TMEM175  | -0.292069  |
| TMEM178  | -0.2764144 |
| TMEM179B | -0.4573569 |
| TMEM18   | -0.3528438 |
| TMEM180  | -0.9839387 |
| TMEM183A | -0.8156915 |
| TMEM184A | -0.4804974 |
| TMEM186  | -0.454545  |
| TMEM19   | -0.2801504 |
| TMEM191C | -0.8050904 |
| TMEM194  | -0.4713569 |
| TMEM198B | -0.6191802 |
| TMEM200A | -2.2412481 |
| TMEM201  | -0.3357582 |
| TMEM203  | -0.7677374 |
| TMEM204  | -1.4691799 |
| TMEM205  | -0.8292651 |
| TMEM216  | -0.9023657 |
| TMEM218  | -0.9304082 |
| TMEM219  | -0.3347321 |
| TMEM222  | -0.3343024 |
| TMEM223  | -0.3472323 |
| TMEM229A | -1.1360679 |
| TMEM234  | -0.6778154 |
| TMEM238  | -0.8361642 |
| TMEM241  | -0.2892647 |
| TMEM242  | -0.6553602 |
| TMEM246  | -1.2871046 |
| TMEM25   | -0.7255349 |
| TMEM254A | -0.2893577 |
| TMEM254C | -0.328176  |
| TMEM255A | -1.7869041 |
| TMEM256  | -1.3547306 |
| TMEM259  | -0.6197572 |
| TMEM26   | -1.1723473 |

|           |            |
|-----------|------------|
| TMEM261   | -0.3455544 |
| TMEM29    | -0.4695082 |
| TMEM35    | -2.746441  |
| TMEM37    | -2.1398087 |
| TMEM38A   | -0.9000244 |
| TMEM39B   | -0.2878537 |
| TMEM40    | -1.1608071 |
| TMEM41A   | -0.6760631 |
| TMEM41B   | -0.5058761 |
| TMEM43    | -0.6476088 |
| TMEM44    | -1.6202321 |
| TMEM50A   | -0.5862336 |
| TMEM51    | -0.8965883 |
| TMEM53    | -1.1599741 |
| TMEM55A   | -0.569356  |
| TMEM56    | -2.150244  |
| TMEM57    | -0.6915913 |
| TMEM59    | -0.2274418 |
| TMEM60    | -0.7374754 |
| TMEM63A   | -0.4542041 |
| TMEM65    | -0.3586447 |
| TMEM8     | -1.8369799 |
| TMEM86A   | -2.827821  |
| TMEM86B   | -1.3255842 |
| TMEM88    | -1.5166774 |
| TMEM9     | -1.177659  |
| TMEM97    | -0.7132225 |
| TMEM98    | -1.933114  |
| TMLHE     | -0.6877096 |
| TMOD1     | -1.7920427 |
| TMOD3     | -0.3645825 |
| TMPO      | -0.6026201 |
| TMPRSS4   | -1.1983066 |
| TMPRSS6   | -1.5485413 |
| TMTC3     | -0.4049337 |
| TMUB2     | -0.9516568 |
| TMX1      | -0.6232925 |
| TMX2      | -0.6028171 |
| TMX4      | -1.1737671 |
| TNFAIP8L2 | -0.4549661 |
| TNFRSF14  | -0.3087316 |
| TNFRSF17  | -0.5914836 |
| TNFRSF19  | -1.0893748 |
| TNFRSF1A  | -0.2380071 |
| TNFSF12   | -0.3223906 |

|            |            |
|------------|------------|
| TNFSF12TNF | -1.1770015 |
| TNFSF13B   | -0.4890971 |
| TNFSF13OS  | -4.101684  |
| TNIK       | -0.5159206 |
| TNK1       | -1.1632924 |
| TNK2       | -0.7512498 |
| TNNI2      | -0.3495393 |
| TNNI3      | -0.8292084 |
| TNNT2      | -0.8722837 |
| TNNT3      | -0.58024   |
| TNPO2      | -0.7747469 |
| TNRC6B     | -0.772418  |
| TNS3       | -0.3424692 |
| TNXB       | -2.6298966 |
| TOB1       | -1.436003  |
| TOB2       | -0.7432036 |
| TOLLIP     | -0.5118837 |
| TOM1       | -0.290617  |
| TOM1L1     | -0.6878181 |
| TOM1L2     | -0.5294738 |
| TOMM22     | -0.6695981 |
| TOMM34     | -0.2311158 |
| TOMM40L    | -0.2410169 |
| TONSL      | -1.2102089 |
| TOP2A      | -1.0298505 |
| TOP2B      | -0.2307096 |
| TOP3B      | -0.2175102 |
| TOPBP1     | -0.7450867 |
| TOR1A      | -0.3749538 |
| TOR4A      | -0.1921039 |
| TPBG       | -1.5087137 |
| TPCN1      | -1.9239221 |
| TPD52L2    | -0.4465604 |
| TPGS2      | -0.4436145 |
| TPI1       | -0.6142211 |
| TPM1       | -0.6496201 |
| TPM2       | -0.2994962 |
| TPMT       | -1.4912698 |
| TPP1       | -0.7306881 |
| TPPP       | -3.595818  |
| TPPP3      | -2.4562547 |
| TPRA1      | -0.8623486 |
| TPRGL      | -0.5275822 |
| TPRN       | -0.598937  |
| TPX2       | -0.9811268 |

|          |            |
|----------|------------|
| TRABD    | -0.5282993 |
| TRAF7    | -0.3717508 |
| TRAK2    | -1.3320017 |
| TRAM1    | -0.6308799 |
| TRAP1    | -0.5885196 |
| TRAPPC1  | -0.5070233 |
| TRAPPC10 | -0.6327863 |
| TRAPPC2L | -0.3088517 |
| TRAPPC9  | -0.531332  |
| TREM2    | -3.030385  |
| TREML1   | -0.5562048 |
| TRERF1   | -0.4605541 |
| TREX2    | -2.4063182 |
| TRF      | -1.5639653 |
| TRHR2    | -0.8576338 |
| TRIAP1   | -0.6907678 |
| TRIL     | -2.3124173 |
| TRIM10   | -1.3388133 |
| TRIM16   | -0.6978829 |
| TRIM2    | -1.1682467 |
| TRIM23   | -0.865731  |
| TRIM24   | -0.4492474 |
| TRIM28   | -0.4769316 |
| TRIM37   | -0.5762034 |
| TRIM40   | -1.1019382 |
| TRIM45   | -0.5577216 |
| TRIM58   | -0.8276253 |
| TRIM59   | -0.7417703 |
| TRIM8    | -0.4311376 |
| TRIO     | -0.1921835 |
| TRIP12   | -0.3315177 |
| TRIP13   | -0.674283  |
| TRIP4    | -0.2761827 |
| TRIP6    | -0.3255639 |
| TRMT11   | -0.5842805 |
| TRMT112  | -0.2380233 |
| TRMT12   | -0.6468673 |
| TRO      | -1.1476631 |
| TROAP    | -1.3298781 |
| TROVE2   | -0.2698028 |
| TRP53    | -0.6132464 |
| TRPC6    | -0.6284232 |
| TRPM6    | -0.2516031 |
| TRPM8    | -0.4640007 |
| TRUB2    | -0.2998405 |



|         |            |
|---------|------------|
| TSC1    | -0.2336726 |
| TSC22D1 | -1.5752954 |
| TSC22D4 | -0.4764414 |
| TSEN15  | -0.4385905 |
| TSEN2   | -0.1773286 |
| TSEN34  | -0.3008514 |
| TSFM    | -0.4811788 |
| TSHZ1   | -0.3763261 |
| TSHZ2   | -0.9545064 |
| TSPAN12 | -1.0565085 |
| TSPAN15 | -1.3185632 |
| TSPAN17 | -1.1108012 |
| TSPAN18 | -1.7164323 |
| TSPAN2  | -1.0350671 |
| TSPAN33 | -0.973053  |
| TSPAN4  | -0.3684025 |
| TSPAN7  | -1.0172682 |
| TSPAN8  | -1.3724289 |
| TSPO2   | -1.1340156 |
| TSSC4   | -0.5839343 |
| TSSK5   | -0.593535  |
| TSSK6   | -0.3046017 |
| TST     | -1.7889204 |
| TSTA3   | -0.4071965 |
| TSTD3   | -1.1538248 |
| TTC1    | -0.363966  |
| TTC12   | -0.8293765 |
| TTC23   | -0.607898  |
| TTC28   | -0.2251186 |
| TTC3    | -0.2770772 |
| TTC30A2 | -1.1454828 |
| TTC30B  | -1.7168646 |
| TTC34   | -0.4812999 |
| TTC39A  | -1.1593854 |
| TTC39C  | -0.2515638 |
| TTC7    | -0.204514  |
| TTC9    | -0.3945727 |
| TTK     | -1.6764073 |
| TTLL1   | -1.0710914 |
| TTLL12  | -1.3684602 |
| TTLL5   | -0.8425989 |
| TTYH2   | -0.8534775 |
| TTYH3   | -0.2614965 |
| TUBA1B  | -0.6649756 |
| TUBA1C  | -0.7357702 |

|            |            |
|------------|------------|
| TUBA4A     | -1.1211853 |
| TUBA8      | -0.4896541 |
| TUBB1      | -1.0404463 |
| TUBB2A     | -0.270277  |
| TUBB2A-PS2 | -0.3954125 |
| TUBB4A     | -0.6789484 |
| TUBB4B     | -0.6529656 |
| TUBB5      | -0.4745498 |
| TUBD1      | -0.2866454 |
| TUBE1      | -0.3055868 |
| TUBG1      | -1.1926494 |
| TUBGCP2    | -1.0219402 |
| TUBGCP3    | -0.35602   |
| TUFT1      | -0.9021606 |
| TUG1       | -0.2980075 |
| TULP2      | -0.3109956 |
| TUSC1      | -1.2666249 |
| TUSC2      | -0.5815525 |
| TUSC3      | -0.6824627 |
| TVP23A     | -1.8711147 |
| TWF2       | -0.3862252 |
| TWIST1     | -1.703954  |
| TWSG1      | -0.6094899 |
| TXLNA      | -0.2509003 |
| TXN2       | -0.2072015 |
| TXNDC5     | -0.6223998 |
| TXNIP      | -0.5121689 |
| TXNRD2     | -1.0363455 |
| TYMS       | -0.3763242 |
| TYMS-PS    | -1.1202455 |
| TYRO3      | -0.3524559 |
| TYROBP     | -0.4591227 |
| TYRP1      | -8.287495  |
| U2AF1      | -0.4025846 |
| U2AF1L4    | -0.889132  |
| U2AF2      | -0.5402041 |
| U2SURP     | -0.4743938 |
| UACA       | -0.5824103 |
| UAP1L1     | -0.5438757 |
| UBA2       | -0.1976948 |
| UBAC1      | -1.4173031 |
| UBAP1      | -0.6116705 |
| UBAP2      | -0.3138032 |
| UBAP2L     | -0.4608545 |
| UBE2C      | -1.3001075 |

|          |            |
|----------|------------|
| UBE2E3   | -1.088697  |
| UBE2H    | -0.4189959 |
| UBE2L6   | -0.731781  |
| UBE2M    | -0.9294033 |
| UBE2O    | -1.1226168 |
| UBE2R2   | -0.5321441 |
| UBE2S    | -1.6330972 |
| UBE2T    | -0.9266944 |
| UBE2V1   | -0.4775167 |
| UBE3A    | -0.266551  |
| UBE3B    | -0.4779778 |
| UBE4A    | -0.4576945 |
| UBE4B    | -0.4505177 |
| UBIAD1   | -2.583016  |
| UBL4     | -0.3208127 |
| UBL5     | -0.3272071 |
| UBL7     | -0.7211771 |
| UBQLN4   | -0.5426636 |
| UBR1     | -0.221406  |
| UBR7     | -0.4692841 |
| UBTD1    | -0.2306466 |
| UBXN1    | -0.6203771 |
| UBXN2B   | -0.7975769 |
| UBXN6    | -0.335814  |
| UBXN8    | -0.5009399 |
| UCHL5    | -0.1897931 |
| UCP2     | -1.0913386 |
| UCP3     | -1.2908449 |
| UEVLD    | -1.1334884 |
| UFSP1    | -1.3787012 |
| UGCG     | -0.4483852 |
| UGP2     | -0.3047705 |
| UGT1A6B  | -0.6271448 |
| UHRF1    | -0.9830875 |
| UHRF1BP1 | -0.3643112 |
| UHRF2    | -0.1920023 |
| ULK2     | -0.3536654 |
| UNC119   | -0.7809634 |
| UNC119B  | -0.4354005 |
| UNC13D   | -0.2220988 |
| UNC50    | -0.373939  |
| UNC5B    | -1.2953966 |
| UNC5CL   | -0.2812829 |
| UNC93B1  | -0.2619534 |
| UPB1     | -0.7762172 |

|        |            |
|--------|------------|
| UPF1   | -1.2396622 |
| UPF2   | -0.4974194 |
| UPK1B  | -0.7755418 |
| UPK3A  | -2.3903003 |
| UPK3B  | -1.9744482 |
| UQCC2  | -0.380723  |
| UQCR10 | -0.3053207 |
| UQCR11 | -0.6657829 |
| UQCRC1 | -1.0921564 |
| UQCRH  | -0.5658989 |
| URB2   | -0.4310184 |
| URGCP  | -0.4801102 |
| URI1   | -0.7078662 |
| URM1   | -0.437767  |
| UROD   | -1.2306962 |
| UROS   | -1.0629416 |
| USF2   | -0.4943986 |
| USHBP1 | -0.994431  |
| USMG5  | -0.319036  |
| USP1   | -0.3522363 |
| USP14  | -0.3989921 |
| USP15  | -0.6354446 |
| USP19  | -0.4100809 |
| USP20  | -0.4831886 |
| USP21  | -0.679028  |
| USP25  | -0.3046808 |
| USP32  | -0.3058629 |
| USP33  | -0.457973  |
| USP39  | -0.6785231 |
| USP45  | -0.8676958 |
| USP46  | -1.3380461 |
| USP5   | -0.5919471 |
| USP50  | -0.1764031 |
| USP51  | -1.0398161 |
| USP6NL | -0.5774539 |
| USP7   | -0.5791402 |
| USP9X  | -0.612535  |
| UVSSA  | -0.3173041 |
| UXS1   | -0.477165  |
| VAC14  | -0.4020491 |
| VAMP2  | -0.3373432 |
| VAMP3  | -0.2676461 |
| VAMP8  | -0.7088971 |
| VANGL1 | -0.9312449 |
| VAPB   | -0.7209334 |

|          |            |
|----------|------------|
| VASN     | -0.8719916 |
| VAT1     | -0.5838509 |
| VAT1L    | -0.9400606 |
| VAV3     | -0.6824346 |
| VAX2     | -0.6334758 |
| VBP1     | -0.7517657 |
| VCAM1    | -0.7154884 |
| VCL      | -0.8314209 |
| VDAC1    | -0.4512348 |
| VDAC3    | -0.3008003 |
| VEGFA    | -0.8008142 |
| VEGFB    | -1.1410198 |
| VEGFC    | -1.2073183 |
| VEZT     | -0.436513  |
| VHL      | -0.3457823 |
| VILL     | -0.8955183 |
| VIM      | -0.1835542 |
| VIPAS39  | -0.2242904 |
| VIT      | -2.0936303 |
| VKORC1   | -0.7761364 |
| VKORC1L1 | -0.6920829 |
| VMAC     | -1.6937513 |
| VMN1R204 | -0.8708174 |
| VMN1R219 | -1.8803155 |
| VMN1R56  | -0.4483516 |
| VMN1R74  | -3.0362504 |
| VMN2R114 | -1.125278  |
| VOPP1    | -0.7583084 |
| VPREB1   | -1.8102431 |
| VPS11    | -0.3120413 |
| VPS13C   | -0.5672655 |
| VPS13D   | -0.2144094 |
| VPS18    | -0.2302175 |
| VPS25    | -0.6447601 |
| VPS26B   | -0.581471  |
| VPS35    | -0.685564  |
| VPS37D   | -0.7052681 |
| VPS41    | -0.5999665 |
| VPS45    | -0.454679  |
| VPS4A    | -0.4178233 |
| VPS51    | -0.5179682 |
| VPS8     | -0.4217448 |
| VRK1     | -1.176712  |
| VRK2     | -0.7666125 |
| VSIG4    | -3.4849415 |

|         |            |
|---------|------------|
| VSTM4   | -1.9667642 |
| VSTM5   | -1.378243  |
| VTI1A   | -0.4412279 |
| VWA1    | -0.2522435 |
| VWA3A   | -4.420879  |
| VWA9    | -0.5282993 |
| VWCE    | -2.4559307 |
| VWDE    | -0.8962324 |
| VWF     | -0.9784155 |
| WAC     | -0.2732711 |
| WAPAL   | -0.2442613 |
| WAS     | -0.6120701 |
| WASF1   | -0.1738453 |
| WBP1    | -0.9243622 |
| WBP2    | -0.5288544 |
| WBSCR16 | -0.5549831 |
| WBSCR27 | -0.9325333 |
| WDPCP   | -0.9943936 |
| WDR18   | -0.3166132 |
| WDR24   | -0.5279579 |
| WDR26   | -0.924963  |
| WDR31   | -0.2401042 |
| WDR33   | -0.3163748 |
| WDR35   | -0.867636  |
| WDR45   | -0.2237382 |
| WDR6    | -1.0165682 |
| WDR60   | -0.8556628 |
| WDR61   | -0.363204  |
| WDR62   | -1.4948139 |
| WDR72   | -2.2857828 |
| WDR73   | -0.2162814 |
| WDR76   | -0.9219959 |
| WDR81   | -0.5510254 |
| WDR83   | -0.5442405 |
| WDR83OS | -0.4236288 |
| WDR86   | -0.6316676 |
| WDR90   | -1.1372752 |
| WDR95   | -0.718262  |
| WDSUB1  | -0.6411157 |
| WDTC1   | -0.4497185 |
| WDYHV1  | -0.6954541 |
| WEE1    | -0.8420682 |
| WFDC1   | -1.1972542 |
| WFDC10  | -2.6472878 |
| WFIKKN1 | -0.3586175 |

|         |            |
|---------|------------|
| WHAMM   | -0.3585763 |
| WHSC1   | -0.2346067 |
| WIBG    | -0.3464768 |
| WIPF2   | -0.338347  |
| WIPF3   | -1.7256176 |
| WIPI1   | -1.4997182 |
| WIPI2   | -0.7975373 |
| WISP2   | -2.2145426 |
| WLS     | -0.6960578 |
| WNK4    | -1.3876185 |
| WNT4    | -1.0829403 |
| WNT5A   | -0.9298928 |
| WNT5B   | -0.5128563 |
| WRAP53  | -0.3965893 |
| WRN     | -1.1840601 |
| WWC2    | -0.4701777 |
| WWP1    | -0.9877815 |
| WWP2    | -0.4490957 |
| WWTR1   | -0.4434338 |
| XAB2    | -0.4914594 |
| XCR1    | -2.2377143 |
| XIRP1   | -0.6783271 |
| XK      | -1.5012622 |
| XKR5    | -1.2753565 |
| XKRX    | -0.3543892 |
| XLR     | -0.6568062 |
| XNDC1   | -0.9048088 |
| XPC     | -0.9727039 |
| XPNPEP1 | -0.5903153 |
| XPNPEP2 | -8.707479  |
| XPO1    | -0.4434991 |
| XPO4    | -0.4333534 |
| XPO5    | -0.2623105 |
| XPO7    | -0.7489386 |
| XPR1    | -0.5386715 |
| XRCC1   | -0.3708391 |
| XRCC2   | -1.6771381 |
| XRCC3   | -1.4491358 |
| XRCC5   | -0.3115807 |
| XRCC6   | -0.4656692 |
| XYLT2   | -0.314764  |
| YARS2   | -0.345006  |
| YBX2    | -0.2947776 |
| YBX3    | -0.4393354 |
| YIF1A   | -0.5369601 |

|         |            |
|---------|------------|
| YIF1B   | -0.5312223 |
| YIPF2   | -0.4352326 |
| YIPF3   | -0.4973049 |
| YOD1    | -1.3145943 |
| YPEL2   | -1.215364  |
| YPEL3   | -1.1900024 |
| YPEL4   | -1.0271792 |
| YPEL5   | -0.9949694 |
| YTHDC2  | -0.3022242 |
| YWHAB   | -0.4469295 |
| ZADH2   | -0.5667749 |
| ZAK     | -0.4376452 |
| ZBED4   | -0.3821416 |
| ZBTB1   | -0.2181525 |
| ZBTB14  | -0.4123936 |
| ZBTB22  | -0.4827371 |
| ZBTB34  | -0.651154  |
| ZBTB42  | -0.5892484 |
| ZBTB44  | -0.4236302 |
| ZBTB45  | -1.2274652 |
| ZBTB49  | -0.2495191 |
| ZBTB7A  | -0.3752756 |
| ZBTB8A  | -1.4816935 |
| ZBTBD6  | -0.7220731 |
| ZC3H14  | -0.5050783 |
| ZC3H6   | -0.3378205 |
| ZC3H7B  | -0.3670979 |
| ZC3HC1  | -0.4085193 |
| ZCCHC14 | -0.5994875 |
| ZCCHC24 | -0.4278517 |
| ZCCHC3  | -1.4868159 |
| ZDHHC1  | -0.898603  |
| ZDHHC12 | -0.343791  |
| ZDHHC14 | -0.8925538 |
| ZDHHC20 | -0.6269872 |
| ZDHHC22 | -0.8253903 |
| ZDHHC24 | -0.8064237 |
| ZDHHC3  | -0.4859295 |
| ZDHHC4  | -0.8575752 |
| ZDHHC7  | -0.6226702 |
| ZER1    | -0.3493042 |
| ZFAND2B | -0.578547  |
| ZFAND4  | -1.5049243 |
| ZFAND6  | -0.8225675 |
| ZFP101  | -1.0898438 |



|          |            |
|----------|------------|
| ZFP113   | -0.4472435 |
| ZFP142   | -0.1756399 |
| ZFP143   | -0.4412067 |
| ZFP180   | -0.2975512 |
| ZFP184   | -0.3829095 |
| ZFP185   | -2.1425326 |
| ZFP207   | -0.3105555 |
| ZFP212   | -0.4407587 |
| ZFP219   | -0.9890287 |
| ZFP229   | -0.825681  |
| ZFP3     | -0.5065334 |
| ZFP30    | -0.9298194 |
| ZFP316   | -0.4809737 |
| ZFP322A  | -0.192349  |
| ZFP335OS | -0.7817483 |
| ZFP345   | -0.2627716 |
| ZFP346   | -0.7243092 |
| ZFP35    | -0.4399071 |
| ZFP354B  | -0.9100971 |
| ZFP354C  | -0.4262793 |
| ZFP358   | -0.4006238 |
| ZFP367   | -0.8807845 |
| ZFP385A  | -0.6130581 |
| ZFP385C  | -1.6967814 |
| ZFP39    | -1.2585697 |
| ZFP395   | -1.2806473 |
| ZFP41    | -0.5169447 |
| ZFP410   | -0.561945  |
| ZFP414   | -0.763216  |
| ZFP423   | -0.2524242 |
| ZFP467   | -1.1502688 |
| ZFP503   | -1.5467975 |
| ZFP518B  | -0.8971882 |
| ZFP521   | -2.242608  |
| ZFP524   | -0.6108875 |
| ZFP526   | -0.5113061 |
| ZFP534   | -0.6922884 |
| ZFP580   | -1.021029  |
| ZFP608   | -0.3372912 |
| ZFP618   | -1.4066603 |
| ZFP619   | -0.2484009 |
| ZFP623   | -0.4051652 |
| ZFP629   | -0.729773  |
| ZFP639   | -0.4636574 |
| ZFP644   | -0.1930952 |

|          |            |
|----------|------------|
| ZFP646   | -0.5013459 |
| ZFP652   | -0.3809524 |
| ZFP668   | -0.281261  |
| ZFP672   | -0.1922822 |
| ZFP688   | -0.6863585 |
| ZFP703   | -0.4734879 |
| ZFP704   | -2.254403  |
| ZFP710   | -0.2844396 |
| ZFP760   | -0.8776147 |
| ZFP770   | -0.3581562 |
| ZFP771   | -0.4644942 |
| ZFP787   | -0.4531183 |
| ZFP808   | -1.0503354 |
| ZFP820   | -1.1114988 |
| ZFP821   | -0.4329672 |
| ZFP846   | -0.3977523 |
| ZFP871   | -0.3879347 |
| ZFP90    | -0.4269385 |
| ZFP91    | -0.4053891 |
| ZFP93    | -0.4950035 |
| ZFP931   | -0.3745318 |
| ZFP934   | -0.632648  |
| ZFP936   | -0.3610334 |
| ZFP949   | -1.0319295 |
| ZFP955A  | -0.3462653 |
| ZFP957   | -0.4123766 |
| ZFPM1    | -1.1365681 |
| ZFPM2    | -0.7631791 |
| ZFR      | -0.415005  |
| ZFYVE1   | -0.7460127 |
| ZFYVE19  | -0.3035483 |
| ZFYVE21  | -1.4642658 |
| ZGRF1    | -0.5204177 |
| ZHX1     | -0.5304365 |
| ZKSCAN14 | -0.2903166 |
| ZKSCAN4  | -2.4073813 |
| ZKSCAN5  | -0.4885593 |
| ZMAT2    | -0.322537  |
| ZMAT5    | -0.3042502 |
| ZMPSTE24 | -0.4555807 |
| ZMYM3    | -0.2791324 |
| ZMYND19  | -0.6962495 |
| ZNF512B  | -0.5276108 |
| ZNHIT2   | -0.579371  |
| ZNHIT3   | -0.5494027 |

|         |            |
|---------|------------|
| ZNRD1AS | -0.4181595 |
| ZRANB1  | -0.6273794 |
| ZRSR1   | -0.7267571 |
| ZSCAN2  | -0.700233  |
| ZSWIM3  | -0.9086254 |
| ZW10    | -0.6149001 |
| ZWILCH  | -0.8967967 |
| ZYX     | -0.6396265 |
| A1CF    | 0.8669009  |
| A3GALT2 | 1.1490943  |
| AAK1    | 0.3239212  |
| AASDH   | 0.2903266  |
| ABCA1   | 0.42218018 |
| ABCA13  | 0.399817   |
| ABCA4   | 2.04045    |
| ABCB1A  | 1.3708797  |
| ABCB1B  | 0.85404444 |
| ABCC1   | 0.66200686 |
| ABHD17B | 0.3908224  |
| ABI1    | 0.28576326 |
| ABI3    | 0.23744726 |
| ABL2    | 0.43784714 |
| ABLIM1  | 0.70534134 |
| ABLIM3  | 0.49521065 |
| ABR     | 0.29538298 |
| ABTB2   | 1.9015112  |
| ACAA1A  | 0.2643323  |
| ACADSB  | 0.33383465 |
| ACE2    | 0.5566695  |
| ACER1   | 0.81341076 |
| ACER2   | 1.0439174  |
| ACKR2   | 0.6931968  |
| ACOT5   | 0.8213937  |
| ACOT7   | 0.23785591 |
| ACP2    | 0.46525192 |
| ACP5    | 0.65187216 |
| ACPP    | 0.5206299  |
| ACSBG2  | 0.5566337  |
| ACSF2   | 0.63836765 |
| ACSL4   | 0.22867012 |
| ACSM1   | 0.78390884 |
| ACTG2   | 0.82288265 |
| ACTR3   | 0.33517027 |
| ACVR1B  | 0.96345997 |
| ADAD1   | 0.49026775 |

|          |            |
|----------|------------|
| ADAM17   | 0.51837087 |
| ADAM18   | 1.002686   |
| ADAM6B   | 1.1384952  |
| ADAM8    | 0.668561   |
| ADAM9    | 1.0619955  |
| ADAMTS1  | 1.5206666  |
| ADAMTS14 | 0.6165323  |
| ADAMTS18 | 0.7365384  |
| ADAMTS4  | 5.7458086  |
| ADAMTS8  | 0.29608822 |
| ADAMTS9  | 2.6031895  |
| ADAP1    | 0.2869296  |
| ADAR     | 0.9148288  |
| ADARB1   | 0.6452575  |
| ADAT1    | 0.22131634 |
| ADCK1    | 0.29227924 |
| ADCY4    | 0.64289045 |
| ADCYAP1  | 0.9151926  |
| ADHFE1   | 0.51580167 |
| ADM      | 2.9909878  |
| ADORA2A  | 0.81775284 |
| ADORA2B  | 1.6038871  |
| ADPRM    | 0.62859535 |
| ADRA2A   | 0.70691514 |
| ADRBK2   | 0.22569227 |
| ADTRP    | 1.3243604  |
| AEBP2    | 0.72563124 |
| AEN      | 0.6237688  |
| AF067061 | 0.7220278  |
| AFF3     | 0.8430929  |
| AFP      | 1.0799909  |
| AFTPH    | 0.24226332 |
| AGBL4    | 1.0972404  |
| AGK      | 0.22969627 |
| AGMAT    | 0.61059284 |
| AGPAT6   | 0.26611996 |
| AGRN     | 0.49115038 |
| AGRP     | 0.5703745  |
| AHSA1    | 0.45115805 |
| AHSA2    | 0.8878503  |
| AICDA    | 1.788022   |
| AIF1L    | 1.0520363  |
| AIM1     | 0.61839104 |
| AIM2     | 0.50244904 |
| AK2      | 0.18248844 |

|          |            |
|----------|------------|
| AK4      | 1.8192434  |
| AKAP12   | 1.7254028  |
| AKAP13   | 0.29281187 |
| AKAP2    | 2.1012087  |
| AKAP4    | 0.45289373 |
| AKAP8    | 0.32303238 |
| AKAP9    | 0.65987444 |
| AKNA     | 0.56460476 |
| AKP3     | 1.2430906  |
| AKT3     | 0.24532461 |
| ALDH1A2  | 1.0277     |
| ALDH7A1  | 0.63282204 |
| ALDH8A1  | 0.59224725 |
| ALDOB    | 1.7898695  |
| ALG1     | 0.41820145 |
| ALG11    | 0.8437705  |
| ALG12    | 0.24478245 |
| ALG8     | 1.5539742  |
| ALKBH1   | 0.6952691  |
| ALKBH6   | 0.45415735 |
| ALLC     | 0.98006487 |
| ALPK1    | 1.1812987  |
| ALPK2    | 0.84418416 |
| ALPK3    | 0.7685778  |
| ALPL     | 1.1219263  |
| ALS2CL   | 0.5067625  |
| AMACR    | 0.21464348 |
| AMBP     | 2.4550974  |
| AMER2    | 1.1012571  |
| AMICA1   | 0.8566408  |
| AMMECR1L | 0.25661802 |
| AMN1     | 0.7920985  |
| AMOTL1   | 0.81910396 |
| AMT      | 1.8090026  |
| AMY1     | 8.933637   |
| AMY2A5   | 10.682104  |
| ANG      | 1.2975545  |
| ANG2     | 1.080035   |
| ANG3     | 1.2640607  |
| ANG4     | 1.83077    |
| ANGEL1   | 0.5770407  |
| ANGPT2   | 1.7490444  |
| ANGPTL1  | 0.7817974  |
| ANKLE2   | 0.31977367 |
| ANKRA2   | 0.51231813 |

|            |            |
|------------|------------|
| ANKRD12    | 0.35348845 |
| ANKRD16    | 0.29847956 |
| ANKRD22    | 1.4497633  |
| ANKRD23    | 0.5338087  |
| ANKRD33    | 0.7991991  |
| ANKRD33B   | 1.293405   |
| ANKRD34B   | 0.8244705  |
| ANKRD37    | 0.27302217 |
| ANKRD52    | 0.34333086 |
| ANKRD66    | 1.6590672  |
| ANTXR2     | 0.38049507 |
| ANXA2      | 0.37916756 |
| ANXA3      | 0.24383068 |
| ANXA4      | 0.3661337  |
| AOC2       | 0.321002   |
| AOC3       | 3.119223   |
| AP1G1      | 0.4368949  |
| AP1M2      | 0.52628183 |
| AP1S3      | 0.3126812  |
| AP3B1      | 0.3074956  |
| AP4E1      | 1.4080715  |
| AP5Z1      | 0.66732407 |
| APBB3      | 0.511075   |
| APEX2      | 0.31138706 |
| APH1B      | 0.24391937 |
| APOA2      | 1.2984838  |
| APOBEC1    | 1.1957827  |
| APOC3      | 0.4038856  |
| APOD       | 0.94364667 |
| APOL7C     | 0.6935096  |
| APOLD1     | 1.608952   |
| APPBP2     | 0.21443653 |
| APPL1      | 0.45333767 |
| AQP12      | 2.234786   |
| AQP3       | 0.6640334  |
| AQP4       | 0.9668882  |
| AQP8       | 1.2737021  |
| ARAP2      | 1.4470863  |
| AREG       | 2.9152014  |
| ARG2       | 1.5405307  |
| ARHGAP200! | 1.9350824  |
| ARHGAP22   | 1.7365999  |
| ARHGAP27   | 0.43564367 |
| ARHGAP30   | 0.8427048  |
| ARHGAP31   | 0.47335958 |

|           |            |
|-----------|------------|
| ARHGAP330 | 0.8171365  |
| ARHGAP8   | 1.5221047  |
| ARHGEF18  | 0.36161423 |
| ARHGEF19  | 0.66371155 |
| ARHGEF38  | 0.86949396 |
| ARID3A    | 0.94613266 |
| ARID4B    | 0.7621367  |
| ARID5A    | 1.9361796  |
| ARID5B    | 0.59373903 |
| ARL1      | 0.34607935 |
| ARL13B    | 0.43302917 |
| ARL14EP   | 0.6131892  |
| ARL5B     | 0.66397667 |
| ARL5C     | 1.2303071  |
| ARL9      | 0.55721736 |
| ARMC12    | 1.1530497  |
| ARMCX2    | 0.64796257 |
| ARPC1B    | 0.6961031  |
| ARPC2     | 0.1843276  |
| ARRDC4    | 0.7540288  |
| ARRDC5    | 0.34976768 |
| ARSA      | 0.22167397 |
| ARSJ      | 1.8047252  |
| ART2A-PS  | 0.44674015 |
| ARV1      | 0.37481785 |
| ARXES2    | 0.3354144  |
| ASAP3     | 1.2133412  |
| ASB10     | 0.63561773 |
| ASB13     | 0.94354343 |
| ASB4      | 2.0821524  |
| ASCC3     | 0.3526187  |
| ASCL1     | 0.7848308  |
| ASH1L     | 0.5184431  |
| ASIC3     | 0.5613792  |
| ASIC4     | 0.65601254 |
| ASIC5     | 1.399009   |
| ASPHD1    | 1.1587014  |
| ASPRV1    | 1.2596755  |
| ASTE1     | 0.745811   |
| ASTL      | 1.6065438  |
| ASTX      | 0.9966743  |
| ATAD1     | 0.2503481  |
| ATAD3A    | 0.59560347 |
| ATF3      | 1.8306861  |
| ATF5      | 0.58951473 |

|            |            |
|------------|------------|
| ATF6       | 0.21973658 |
| ATG16L2    | 0.8205457  |
| ATMIN      | 0.24996138 |
| ATOH7      | 2.346559   |
| ATP10A     | 0.7423806  |
| ATP11A     | 1.1828985  |
| ATP2A1     | 0.49739456 |
| ATP6V0A2   | 0.3628521  |
| ATP6V1G2   | 0.6817355  |
| ATP7A      | 0.21508455 |
| ATP8B4     | 0.21496391 |
| ATP9B      | 0.6464138  |
| ATRNL1     | 0.47647858 |
| ATXN1L     | 0.523139   |
| ATXN7L1OS2 | 0.7953265  |
| AVPI1      | 0.81249714 |
| AVPR1A     | 3.1798959  |
| AVPR2      | 5.3302655  |
| B3GALNT1   | 1.2882376  |
| B3GALT5    | 1.1077776  |
| B3GALT6    | 0.4453025  |
| B3GAT1     | 0.9086764  |
| B3GAT2     | 0.27390575 |
| B3GNT2     | 0.44043016 |
| B3GNT7     | 1.890636   |
| B3GNTL1    | 0.20042562 |
| B4GALT5    | 1.3138275  |
| B9D1OS     | 0.8664031  |
| BACH1      | 1.2099667  |
| BAG3       | 0.42576647 |
| BAG5       | 0.22192717 |
| BANK1      | 0.31235886 |
| BARHL1     | 0.49935174 |
| BASP1      | 1.1139331  |
| BATF       | 1.839428   |
| BATF2      | 1.8773184  |
| BAX        | 2.0428948  |
| BAZ1A      | 0.37345982 |
| BAZ2B      | 0.23494482 |
| BCAR3      | 0.38033867 |
| BCAS1      | 1.8596649  |
| BCAS3OS2   | 0.42742014 |
| BCAT1      | 1.2940612  |
| BCDIN3D    | 0.24574566 |
| BCKDHB     | 0.88318586 |



|         |            |
|---------|------------|
| BCL11B  | 0.3948927  |
| BCL2A1C | 2.4746747  |
| BCL2A1D | 2.2620535  |
| BCL2L11 | 0.67236257 |
| BCL2L14 | 1.2742586  |
| BCL3    | 2.5083609  |
| BCL6    | 0.7524929  |
| BCL6B   | 0.47641706 |
| BCL9    | 1.4558625  |
| BCR     | 1.0523667  |
| BDKRB1  | 0.98528695 |
| BDP1    | 0.31192732 |
| BEND3   | 0.4505849  |
| BEND4   | 0.21742392 |
| BEX1    | 0.9409485  |
| BEX2    | 1.9715011  |
| BFAR    | 0.8008642  |
| BFSP2   | 0.22245121 |
| BHLHE40 | 0.5996504  |
| BHMT    | 0.45696402 |
| BIRC2   | 0.67487335 |
| BIRC3   | 1.7918692  |
| BLNK    | 1.0292406  |
| BLOC1S6 | 0.23131275 |
| BMP7    | 1.1134183  |
| BMP8A   | 1.20294    |
| BMPER   | 0.83058643 |
| BMPR1B  | 0.9099252  |
| BOLL    | 1.8718915  |
| BOP1    | 0.31506872 |
| BPIFB5  | 1.4002476  |
| BPIFB6  | 2.583274   |
| BPTF    | 0.20314598 |
| BRD1    | 0.3221345  |
| BRI3    | 0.2541132  |
| BRICD5  | 0.2507131  |
| BRIX1   | 0.27194977 |
| BSND    | 0.9713981  |
| BST1    | 1.2845159  |
| BST2    | 1.5240335  |
| BTBD16  | 0.63553953 |
| BTBD19  | 0.43654394 |
| BTBD8   | 0.58777523 |
| BTBD9   | 0.25152063 |
| BTG1    | 0.5996914  |

|          |            |
|----------|------------|
| BTG3     | 0.34448576 |
| BTK      | 0.85606337 |
| BTLA     | 0.75589705 |
| BZW2     | 0.22883654 |
| C1RA     | 0.27487373 |
| C2       | 0.42484283 |
| C2CD4B   | 1.3838375  |
| C3       | 0.33897066 |
| C5AR1    | 1.3471262  |
| CABLES1  | 0.57879305 |
| CABP2    | 3.1404312  |
| CABP4    | 0.55923843 |
| CABP5    | 1.580451   |
| CACNA1S  | 0.60127115 |
| CACNB3   | 0.9284253  |
| CACNG6   | 0.31261134 |
| CACUL1   | 0.5558448  |
| CALHM1   | 0.33333874 |
| CAMK2N1  | 0.54488564 |
| CAMK4    | 1.1173449  |
| CAMKK1   | 0.3281417  |
| CAMSAP1  | 0.272007   |
| CAMTA1   | 1.9743655  |
| CAMTA2   | 0.84701395 |
| CANT1    | 0.24615335 |
| CAPNS2   | 0.9638338  |
| CAR12    | 1.1054156  |
| CAR13    | 1.804841   |
| CARD6    | 0.6339812  |
| CARNS1   | 0.20661879 |
| CARTPT   | 1.2735717  |
| CASP1    | 0.335742   |
| CASP16   | 1.5396774  |
| CASP4    | 1.9992933  |
| CASP8    | 0.2250328  |
| CASZ1    | 0.27714944 |
| CATIP    | 0.4687338  |
| CATSPER1 | 1.4929333  |
| CATSPER2 | 0.44254708 |
| CATSPER4 | 1.3029351  |
| CBFB     | 0.72570276 |
| CBLB     | 0.43734598 |
| CBS      | 1.8688157  |
| CBX4     | 0.33646822 |
| CC2D1B   | 0.2968936  |

|          |            |
|----------|------------|
| CC2D2B   | 0.9346578  |
| CCBE1    | 0.3549435  |
| CCBL2    | 0.8254967  |
| CCDC102A | 0.4311695  |
| CCDC11   | 1.7759421  |
| CCDC114  | 0.5498078  |
| CCDC115  | 0.5314684  |
| CCDC13   | 0.42995167 |
| CCDC163  | 0.26022005 |
| CCDC169  | 0.87579703 |
| CCDC177  | 1.2715623  |
| CCDC183  | 0.98435116 |
| CCDC184  | 0.8777137  |
| CCDC33   | 0.83659434 |
| CCDC42OS | 1.8158078  |
| CCDC50   | 0.78244925 |
| CCDC59   | 0.32857132 |
| CCDC62   | 0.51717806 |
| CCDC64   | 0.32822037 |
| CCDC66   | 0.4140768  |
| CCDC78   | 4.858893   |
| CCDC79   | 0.5938363  |
| CCDC81   | 2.5879674  |
| CCDC85A  | 1.2504897  |
| CCDC86   | 0.4967556  |
| CCDC88B  | 0.6668482  |
| CCDC9    | 0.2932105  |
| CCDC93   | 0.30687833 |
| CCKAR    | 0.7321992  |
| CCKBR    | 1.0437646  |
| CCL1     | 1.0456791  |
| CCL11    | 3.5423784  |
| CCL12    | 3.931994   |
| CCL17    | 3.5015655  |
| CCL19    | 0.9074836  |
| CCL2     | 5.819554   |
| CCL25    | 0.5363841  |
| CCL3     | 6.103713   |
| CCL4     | 5.4779468  |
| CCL5     | 0.49696016 |
| CCL7     | 4.6872835  |
| CCND2    | 0.78052616 |
| CCNG2    | 0.27623463 |
| CCNL1    | 0.34022474 |
| CCNY     | 2.7571352  |

|          |            |
|----------|------------|
| CCNYL1   | 0.9542928  |
| CCR6     | 0.23641872 |
| CCR7     | 1.4655972  |
| CCR8     | 0.92099    |
| CCRL2    | 2.0216956  |
| CCSER2   | 0.5244436  |
| CCT3     | 0.28413677 |
| CD14     | 3.7933016  |
| CD163L1  | 1.7561352  |
| CD164    | 0.32704735 |
| CD19     | 0.5951886  |
| CD2      | 0.22718763 |
| CD200    | 1.3166409  |
| CD244    | 0.892683   |
| CD247    | 0.33286548 |
| CD274    | 1.7445025  |
| CD300LF  | 0.88565874 |
| CD302    | 0.8065386  |
| CD33     | 1.1362553  |
| CD38     | 1.2412539  |
| CD3D     | 0.5978079  |
| CD3E     | 0.6034322  |
| CD40     | 1.3697929  |
| CD44     | 1.435143   |
| CD5      | 0.34613562 |
| CD53     | 0.35348272 |
| CD55     | 0.5503683  |
| CD6      | 0.59400225 |
| CD63     | 0.5093384  |
| CD69     | 3.221467   |
| CD70     | 1.3753386  |
| CD72     | 0.57064486 |
| CD83     | 1.3268585  |
| CD86     | 0.50169086 |
| CD97     | 0.20762444 |
| CDC42EP2 | 1.4437413  |
| CDH15    | 1.056706   |
| CDH17    | 1.6016593  |
| CDH2     | 0.48058844 |
| CDH22    | 0.69418216 |
| CDH4     | 0.62566185 |
| CDH5     | 0.46611023 |
| CDH6     | 2.2869387  |
| CDK18    | 0.86310434 |
| CDK5     | 0.3131175  |

|           |            |
|-----------|------------|
| CDK5R1    | 0.59495354 |
| CDKL3     | 0.8093145  |
| CDKN1A    | 1.0677052  |
| CDKN2B    | 1.0847149  |
| CDV3      | 0.25673962 |
| CEACAM16  | 1.2007523  |
| CEACAM18  | 1.2359831  |
| CEACAM9   | 1.0603862  |
| CEBPB     | 1.6610742  |
| CEBPD     | 2.164606   |
| CEL       | 8.703017   |
| CELA1     | 3.4513607  |
| CELA2A    | 9.057886   |
| CELA3B    | 9.761423   |
| CELSR1    | 0.46383142 |
| CEMIP     | 0.9579022  |
| CEP112OS2 | 1.2455986  |
| CEP350    | 0.21299458 |
| CEP85L    | 1.2502832  |
| CEPT1     | 0.40971804 |
| CERS3     | 1.5419362  |
| CERS4     | 0.5169058  |
| CERS5     | 0.35156345 |
| CERS6     | 1.3139958  |
| CES1G     | 0.6732378  |
| CES1H     | 0.9824357  |
| CES2B     | 0.85224223 |
| CES2C     | 0.90745425 |
| CES5A     | 0.82472014 |
| CFB       | 1.4551697  |
| CFLAR     | 1.3148656  |
| CGA       | 1.7474618  |
| CH25H     | 1.797615   |
| CHAC1     | 0.6021538  |
| CHD2      | 0.27175283 |
| CHD3      | 0.34887123 |
| CHD7      | 0.69517803 |
| CHD8      | 0.33729982 |
| CHEK1     | 1.5443735  |
| CHGA      | 1.6957061  |
| CHIC1     | 1.4627683  |
| CHIC2     | 0.23345089 |
| CHIL1     | 1.389247   |
| CHIL5     | 1.2350969  |
| CHIL6     | 2.3499222  |

|          |            |
|----------|------------|
| CHL1     | 1.9200888  |
| CHORDC1  | 0.55809736 |
| CHPF     | 0.69776964 |
| CHRM3    | 1.5226142  |
| CHRM4    | 1.5060077  |
| CHRNA9   | 0.7685051  |
| CHRN4    | 1.069269   |
| CHST10   | 0.55035686 |
| CHST11   | 0.7948389  |
| CHST7    | 0.45572948 |
| CIPC     | 0.8798857  |
| CIR1     | 0.36391068 |
| CISH     | 0.90105677 |
| CK137956 | 1.5243785  |
| CKMT1    | 1.4991622  |
| CLCA1    | 0.25597048 |
| CLCA2    | 0.23627043 |
| CLCF1    | 0.6638222  |
| CLCN5    | 0.6668327  |
| CLDN12   | 0.33205962 |
| CLDN14   | 1.0531723  |
| CLDN23   | 0.30943465 |
| CLDN25   | 0.9755964  |
| CLDN26   | 1.3426337  |
| CLDN3    | 1.3676932  |
| CLEC12B  | 0.5985615  |
| CLEC2D   | 1.2028956  |
| CLEC2I   | 0.22589207 |
| CLEC4A1  | 0.56737137 |
| CLEC4A2  | 1.2262454  |
| CLEC4D   | 2.1316385  |
| CLEC4E   | 3.1272879  |
| CLEC4F   | 1.5708575  |
| CLEC4N   | 0.7174654  |
| CLEC5A   | 3.0684366  |
| CLIC1    | 0.9331727  |
| CLK2     | 0.3325224  |
| CLMP     | 0.8365481  |
| CLN5     | 0.520833   |
| CLPS     | 8.613361   |
| CLRN3    | 0.2509215  |
| CLSTN2   | 0.30157042 |
| CLTB     | 0.39460182 |
| CLU      | 0.29887486 |
| CMA2     | 0.23810196 |

|          |            |
|----------|------------|
| CMAH     | 0.35950184 |
| CMPK2    | 1.0976906  |
| CMTM6    | 0.5547118  |
| CMTR1    | 0.570909   |
| CMTR2    | 0.47662735 |
| CMYA5    | 1.6750364  |
| CNBD2    | 0.73999286 |
| CNGA1    | 1.0917315  |
| CNIH4    | 0.25236607 |
| CNKSR3   | 2.0609608  |
| CNN1     | 0.23317051 |
| CNN3     | 0.4507947  |
| CNOT6L   | 0.7092066  |
| CNR2     | 0.3412404  |
| CNTNAP5A | 1.5010693  |
| CNTRL    | 0.4639864  |
| COBLL1   | 0.39996338 |
| COG5     | 0.5086911  |
| COL10A1  | 1.106226   |
| COL11A2  | 0.70867276 |
| COL20A1  | 0.54530954 |
| COL22A1  | 3.112515   |
| COL4A1   | 1.0486717  |
| COL4A2   | 0.6321354  |
| COL6A4   | 0.7717855  |
| COL7A1   | 0.7219181  |
| COL8A1   | 0.9891794  |
| COMMD7   | 0.39743423 |
| COPG2OS2 | 0.20113087 |
| COPS7A   | 0.5894451  |
| CORT     | 0.57751894 |
| COX17    | 0.9592581  |
| COX3     | 0.1887207  |
| CP       | 2.1903424  |
| CPA1     | 9.8069725  |
| CPA2     | 8.89892    |
| CPB1     | 11.927186  |
| CPB2     | 1.4729047  |
| CPHX1    | 0.70938873 |
| CPLX2    | 1.4523535  |
| CPNE9    | 1.1315486  |
| CR2      | 1.3522501  |
| CREB3    | 0.4756117  |
| CREB3L1  | 0.23532963 |
| CREB3L2  | 0.34491014 |

|          |            |
|----------|------------|
| CREBBP   | 0.38971472 |
| CREBL2   | 1.1286345  |
| CREBZF   | 0.22847748 |
| CRELD2   | 0.76067257 |
| CREM     | 1.7445426  |
| CRIM1    | 0.61815405 |
| CRIP3    | 1.2547865  |
| CRISPLD2 | 1.4883213  |
| CRK      | 1.0127664  |
| CRLF2    | 0.32533884 |
| CRLF3    | 0.78129625 |
| CRNDE    | 1.4927993  |
| CRNN     | 1.7955062  |
| CRTC2    | 0.6992049  |
| CRY2     | 0.21734762 |
| CRYAA    | 0.74818707 |
| CRYBA1   | 1.1005244  |
| CRYBB3   | 1.7948246  |
| CRYGD    | 0.7120199  |
| CRYGN    | 1.1327715  |
| CSF1     | 0.7434416  |
| CSF2     | 3.7690778  |
| CSF2RA   | 0.5287905  |
| CSF2RB   | 1.158124   |
| CSF2RB2  | 1.0841818  |
| CSF3     | 6.319416   |
| CSF3R    | 0.6080637  |
| CSMD2    | 1.1372819  |
| CSNK1D   | 0.34192848 |
| CSPRS    | 1.0888119  |
| CSRNP1   | 1.9464216  |
| CSRNP3   | 0.6559808  |
| CST7     | 0.45980597 |
| CST8     | 0.93694615 |
| CSTB     | 0.45049858 |
| CTGF     | 0.23427773 |
| CTLA4    | 2.308488   |
| CTNND1   | 0.6035881  |
| CTPS     | 0.67397213 |
| CTPS2    | 0.26802063 |
| CTRB1    | 9.197462   |
| CTRC     | 4.663919   |
| CTRL     | 6.2564983  |
| CTSO     | 0.40091372 |
| CTSS     | 0.21703196 |



|           |            |
|-----------|------------|
| CTSZ      | 0.46590948 |
| CTTNBP2NL | 1.0081077  |
| CTU2      | 0.46300125 |
| CUZD1     | 7.1731896  |
| CWC22     | 1.6203623  |
| CX3CL1    | 3.4323378  |
| CXCL1     | 7.3250604  |
| CXCL10    | 4.017641   |
| CXCL12    | 0.5335994  |
| CXCL13    | 2.3379927  |
| CXCL16    | 1.0202079  |
| CXCL2     | 5.6254663  |
| CXCL3     | 3.0072234  |
| CXCL5     | 4.432497   |
| CXCL9     | 1.2320042  |
| CXCR1     | 0.7033982  |
| CXCR2     | 1.1469035  |
| CXCR5     | 0.93828917 |
| CXXC4     | 1.0003572  |
| CYB561    | 0.77997017 |
| CYB5B     | 0.31519794 |
| CYB5RL    | 0.41612554 |
| CYBB      | 0.4884553  |
| CYCS      | 0.2683506  |
| CYFIP1    | 0.5270276  |
| CYFIP2    | 0.1906619  |
| CYLC2     | 2.267627   |
| CYLD      | 0.48851252 |
| CYP1B1    | 0.7490268  |
| CYP20A1   | 0.18297267 |
| CYP26A1   | 0.8602345  |
| CYP26B1   | 0.9285269  |
| CYP2A22   | 1.3508763  |
| CYP2D26   | 0.37534142 |
| CYP2D40   | 1.1162877  |
| CYP39A1   | 2.0506868  |
| CYP4A12B  | 1.2582977  |
| CYP4F13   | 0.36182976 |
| CYP7B1    | 2.2117052  |
| CYPT10    | 1.2691798  |
| CYR61     | 0.7331028  |
| CYTH1     | 0.7028928  |
| CYTIP     | 0.90150833 |
| CYYR1     | 1.7834916  |
| DAB1      | 0.5808177  |

|           |            |
|-----------|------------|
| DACH1     | 0.5351901  |
| DAF2      | 0.60760117 |
| DANCR     | 0.8131232  |
| DAPK3     | 0.25778008 |
| DAPL1     | 0.62563133 |
| DAPP1     | 0.4347887  |
| DAW1      | 1.2408798  |
| DAXX      | 1.3869424  |
| DBHOS     | 0.3326521  |
| DBX2      | 2.2693725  |
| DCAF12L2  | 1.2772002  |
| DCC       | 0.9231534  |
| DCLRE1C   | 0.5432062  |
| DCP2      | 0.6189332  |
| DCPP3     | 0.51779985 |
| DCUN1D3   | 1.092562   |
| DDAH1     | 1.4020123  |
| DDB2      | 0.303061   |
| DDIT4     | 0.53293896 |
| DDT       | 0.4012351  |
| DDX18     | 0.3767748  |
| DDX21     | 0.6092782  |
| DDX24     | 0.4504881  |
| DDX25     | 0.95163155 |
| DDX31     | 0.40789318 |
| DDX43     | 0.31290746 |
| DDX5      | 0.17553425 |
| DDX52     | 0.39063072 |
| DDX54     | 0.18728542 |
| DDX58     | 1.5684328  |
| DDX6      | 0.5794449  |
| DEF6      | 0.43809462 |
| DEFA2     | 1.3675883  |
| DEFA3     | 0.9996884  |
| DEFA-RS10 | 0.8502908  |
| DEFA-RS12 | 1.3242004  |
| DEFA-RS2  | 1.2667251  |
| DEFA-RS4  | 1.4332705  |
| DEFA-RS7  | 1.4848251  |
| DEFB33    | 0.82544804 |
| DEFB35    | 1.3203938  |
| DEFB36    | 0.76525116 |
| DENND2D   | 0.72762966 |
| DERL2     | 0.2385621  |
| DGAT2     | 1.4088912  |

|          |            |
|----------|------------|
| DGKA     | 0.57899237 |
| DGKEOS   | 0.5834775  |
| DGKH     | 1.3733625  |
| DGKK     | 0.25962758 |
| DGKQ     | 0.25626612 |
| DHPS     | 0.23103428 |
| DHRS9    | 0.81688786 |
| DHX30    | 0.29147768 |
| DHX33    | 0.7135472  |
| DHX35    | 0.26354647 |
| DHX58    | 0.7275901  |
| DIAP2    | 0.21021557 |
| DIO3OS   | 0.4824574  |
| DIRAS1   | 1.5626166  |
| DIXDC1   | 0.4390216  |
| DKK2     | 0.28794646 |
| DLC1     | 0.49892426 |
| DLK1     | 1.4977     |
| DLL4     | 0.9513383  |
| DMBT1    | 10.251303  |
| DMP1     | 0.8712063  |
| DMRTC1C2 | 0.6949365  |
| DMTF1    | 0.4951601  |
| DMXL2    | 0.52855873 |
| DNAAF1   | 0.73006773 |
| DNAH10   | 0.8067758  |
| DNAH6    | 0.57681346 |
| DNAJA1   | 0.7573805  |
| DNAJB5   | 0.35771322 |
| DNAJB6   | 0.22159815 |
| DNAJB8   | 1.4361548  |
| DNAJB9   | 0.4703641  |
| DNAJC1   | 0.20097637 |
| DNAJC2   | 0.7933812  |
| DNAJC21  | 0.4507804  |
| DNAJC5   | 0.4271207  |
| DNAJC7   | 1.3490863  |
| DNASE1   | 0.86065006 |
| DNASE1L3 | 1.0190935  |
| DNASE2A  | 0.4228258  |
| DNASE2B  | 2.1533074  |
| DOC2G    | 0.63428307 |
| DOCK10   | 0.37080336 |
| DOCK4    | 0.71833324 |
| DOCK5    | 0.5210371  |

|          |            |
|----------|------------|
| DOCK8    | 0.46345615 |
| DOCK9    | 0.7247877  |
| DPEP3    | 0.90470743 |
| DPH2     | 0.7013383  |
| DPH5     | 0.39263725 |
| DPP7     | 0.31270933 |
| DPPA4    | 0.4961648  |
| DPY19L2  | 0.81016445 |
| DPYSL3   | 0.19095945 |
| DRAM1    | 0.8659477  |
| DRD1A    | 0.5412104  |
| DRD2     | 1.1189947  |
| DRD5     | 1.884409   |
| DSC3     | 0.3245542  |
| DSCAM    | 0.6309092  |
| DSG1C    | 1.7194018  |
| DSG2     | 0.8360057  |
| DSPP     | 1.3182952  |
| DST      | 0.6861675  |
| DTX1     | 0.7947507  |
| DTX2     | 0.7758236  |
| DTX3L    | 0.9513917  |
| DUOX1    | 0.20521164 |
| DUOXA1   | 0.8612137  |
| DUPD1    | 1.3860731  |
| DUS3L    | 0.32794714 |
| DUSP1    | 1.813592   |
| DUSP11   | 0.3977909  |
| DUSP12   | 0.5050149  |
| DUSP16   | 2.3833256  |
| DUSP18   | 0.4544046  |
| DUSP2    | 2.0593934  |
| DUSP4    | 0.5186863  |
| DUSP5    | 1.5932579  |
| DUSP6    | 0.2666397  |
| DUSP7    | 0.3711319  |
| DUX      | 0.7578523  |
| DVL3     | 0.78233385 |
| DYNC1H1  | 0.28971434 |
| DYNLT3   | 0.3965454  |
| DYRK2    | 0.60493517 |
| EBF1     | 0.68841934 |
| EBI3     | 1.1847215  |
| EBNA1BP2 | 0.30365515 |
| ECE1     | 0.19045973 |

|         |            |
|---------|------------|
| ECE2    | 0.8181958  |
| ECEL1   | 0.67901707 |
| ECHDC3  | 0.7724271  |
| ECSCR   | 0.7358885  |
| ECSIT   | 0.194808   |
| EDN1    | 2.933407   |
| EDNRA   | 0.18869972 |
| EEA1    | 0.92930365 |
| EED     | 0.23906136 |
| EFCAB14 | 0.28288078 |
| EFCAB4B | 0.51636004 |
| EFCAB8  | 1.3079057  |
| EFCAB9  | 0.32098746 |
| EFHD2   | 0.5673909  |
| EGFBP2  | 3.795745   |
| EGFEM1  | 1.2635729  |
| EGFR    | 1.3677685  |
| EGLN2   | 1.0447392  |
| EGLN3   | 0.6499977  |
| EGR1    | 1.3259578  |
| EGR2    | 1.4794626  |
| EHD1    | 1.8000484  |
| EHD3    | 0.32215166 |
| EHF     | 1.6203127  |
| EID2    | 0.44471025 |
| EID3    | 1.2727227  |
| EIF1A   | 0.95985746 |
| EIF2AK2 | 1.036243   |
| EIF2S3Y | 1.272197   |
| EIF4A1  | 0.44537258 |
| EIF4A2  | 0.7632756  |
| ELK4    | 0.41202116 |
| ELL3    | 1.2184806  |
| ELMO1   | 1.2934918  |
| ELOVL4  | 0.604054   |
| ELOVL5  | 0.28433895 |
| ELOVL6  | 0.4502759  |
| EMB     | 0.5174694  |
| EMC4    | 0.30739737 |
| EMR1    | 0.26265478 |
| ENC1    | 1.831326   |
| ENO2    | 0.4744377  |
| ENPP2   | 0.40311813 |
| ENPP4   | 0.53787756 |
| ENTPD4  | 2.36132    |

|          |            |
|----------|------------|
| EP400    | 0.24458599 |
| EPAS1    | 0.28776932 |
| EPB4.1L1 | 0.808712   |
| EPCAM    | 0.8339417  |
| EPGN     | 1.1370211  |
| EPHA10   | 0.27488494 |
| EPHA6    | 0.89000845 |
| EPHA7    | 1.3903358  |
| EPHB2    | 0.6562104  |
| EPHX4    | 0.6567023  |
| EPPK1    | 0.81818175 |
| EPSTI1   | 0.7107928  |
| EQTN     | 0.7597511  |
| ERC1     | 0.19318318 |
| EREG     | 3.6880367  |
| ERMN     | 1.3517165  |
| ERN1     | 0.29063106 |
| ERO1LB   | 0.28909636 |
| ERP27    | 0.62116003 |
| ERP44    | 0.3723774  |
| ERRFI1   | 3.6864028  |
| ERV3     | 1.6132131  |
| ESM1     | 0.48080635 |
| ESPNL    | 0.4010949  |
| ESR2     | 0.25822687 |
| ESRP2    | 3.740818   |
| ESRRB    | 0.83247924 |
| ETNK1    | 0.7089286  |
| ETNK2    | 0.5451572  |
| ETS2     | 0.9460721  |
| ETV3     | 1.1135087  |
| ETV3L    | 0.6535182  |
| ETV6     | 1.0037618  |
| EVA1C    | 1.0970707  |
| EXOC1    | 0.2693348  |
| EXOC3L4  | 0.5598879  |
| EXOC6B   | 0.28871775 |
| EXOSC6   | 0.3405695  |
| EYA4     | 0.72562337 |
| F10      | 0.979661   |
| F11R     | 0.8582082  |
| F13A1    | 0.22808933 |
| F2R      | 0.34127092 |
| F3       | 0.45386267 |
| FABP3    | 0.89349747 |

|          |            |
|----------|------------|
| FABP5    | 0.5709429  |
| FAIM     | 0.37551165 |
| FAM102A  | 1.0212226  |
| FAM107A  | 0.73513126 |
| FAM115E  | 1.2321677  |
| FAM118A  | 0.5516257  |
| FAM120B  | 0.55293703 |
| FAM120C  | 1.077312   |
| FAM124B  | 0.32471085 |
| FAM126B  | 0.30549097 |
| FAM129A  | 0.49701977 |
| FAM129B  | 1.4794307  |
| FAM134B  | 0.42589235 |
| FAM13C   | 1.6681089  |
| FAM160A1 | 0.51061606 |
| FAM162A  | 0.23531961 |
| FAM162B  | 0.37344694 |
| FAM163B  | 1.4180794  |
| FAM166A  | 0.55529165 |
| FAM168B  | 0.31508064 |
| FAM169A  | 1.2432578  |
| FAM179B  | 0.19957161 |
| FAM181A  | 1.1314957  |
| FAM184B  | 0.8383086  |
| FAM188A  | 0.30756044 |
| FAM196A  | 1.1141329  |
| FAM198A  | 0.76926327 |
| FAM19A3  | 0.7724364  |
| FAM206A  | 0.484941   |
| FAM208A  | 0.43776846 |
| FAM208B  | 0.835135   |
| FAM20C   | 0.90886116 |
| FAM214A  | 0.25547218 |
| FAM217A  | 1.5553796  |
| FAM222B  | 0.8468232  |
| FAM228A  | 0.95367646 |
| FAM25C   | 1.4295862  |
| FAM26E   | 0.4436891  |
| FAM26F   | 1.0503263  |
| FAM3B    | 0.5947497  |
| FAM46A   | 0.30805683 |
| FAM47E   | 0.66921663 |
| FAM49A   | 0.71050787 |
| FAM53A   | 0.30751562 |
| FAM53C   | 0.30335855 |

|         |            |
|---------|------------|
| FAM60A  | 0.7009406  |
| FAM65B  | 0.8837681  |
| FAM72A  | 0.25744343 |
| FAM78B  | 2.971177   |
| FAM84B  | 0.641968   |
| FAM89A  | 0.85476446 |
| FAP     | 1.6568384  |
| FAS     | 2.230434   |
| FASL    | 0.4335568  |
| FASTKD1 | 0.4213605  |
| FASTKD3 | 0.56495    |
| FASTKD5 | 0.19405079 |
| FBL     | 0.45294046 |
| FBXL12  | 0.7619157  |
| FBXL5   | 0.73394156 |
| FBXL7   | 0.71293354 |
| FBXO22  | 0.37658596 |
| FBXO24  | 1.0123429  |
| FBXO39  | 1.2307179  |
| FBXO4   | 0.49964476 |
| FBXO47  | 0.71985245 |
| FBXW10  | 0.48993587 |
| FBXW11  | 0.41011906 |
| FBXW13  | 2.2227733  |
| FBXW17  | 0.41111422 |
| FBXW19  | 0.7321477  |
| FBXW26  | 1.1251721  |
| FCAMR   | 1.235426   |
| FCER1G  | 0.53942347 |
| FCGR2B  | 0.56067276 |
| FCRL1   | 1.4184222  |
| FERD3L  | 1.6668253  |
| FFAR1   | 1.0367787  |
| FFAR2   | 1.0398083  |
| FGB     | 2.3891604  |
| FGD3    | 0.4623294  |
| FGD4    | 0.7180357  |
| FGD6    | 0.35151172 |
| FGF17   | 1.9941056  |
| FGF21   | 2.7406847  |
| FGF23   | 0.5094714  |
| FGF3    | 0.7985103  |
| FGFR1OP | 0.29082108 |
| FGFR2   | 0.33660364 |
| FGG     | 2.6016498  |



|         |            |
|---------|------------|
| FHOD1   | 0.30372238 |
| FHOD3   | 0.56697226 |
| FILIP1L | 0.77656317 |
| FJX1    | 3.2623568  |
| FKBP5   | 1.5647955  |
| FKBP6   | 3.581771   |
| FLCN    | 0.19771194 |
| FLNA    | 0.18988705 |
| FLNB    | 1.6300769  |
| FLOT1   | 0.23121119 |
| FLRT3   | 0.37018967 |
| FMNL2   | 0.91609573 |
| FMO3    | 1.9489062  |
| FMO6    | 1.0296474  |
| FNBP1L  | 1.1582546  |
| FNDC3B  | 0.8990803  |
| FNDC7   | 0.4524274  |
| FOLH1   | 0.75278735 |
| FOLR4   | 0.6398196  |
| FOS     | 2.1918736  |
| FOSL1   | 1.3210795  |
| FOSL2   | 1.8208604  |
| FOXA3   | 0.87757707 |
| FOXC1   | 0.88847446 |
| FOXE3   | 1.4129279  |
| FOXF1   | 1.6151237  |
| FOXJ3   | 0.33088732 |
| FOXN2   | 0.3993082  |
| FOXP1   | 0.37805176 |
| FOXP4   | 1.3159132  |
| FPR1    | 2.3586054  |
| FPR2    | 2.1885934  |
| FPR3    | 2.4330957  |
| FPR-RS6 | 1.6926866  |
| FRMD7   | 1.996829   |
| FRMPD4  | 0.96017313 |
| FRZB    | 0.65267324 |
| FSCN1   | 1.5513806  |
| FST     | 0.66314125 |
| FUBP1   | 0.2642932  |
| FUK     | 0.27088165 |
| FURIN   | 0.29225063 |
| FUT1    | 0.22646928 |
| FYB     | 0.17010593 |
| FZD1    | 0.7300792  |

|            |            |
|------------|------------|
| FZD4       | 0.8477268  |
| FZD9       | 0.38302588 |
| G3BP1      | 0.3433938  |
| G630055G22 | 1.1355083  |
| G6BOS      | 0.8613572  |
| GAB3       | 1.0411029  |
| GABRB1     | 0.45649266 |
| GABRG2     | 0.80830073 |
| GABRP      | 0.999835   |
| GADD45B    | 2.3357725  |
| GADD45G    | 1.1872578  |
| GALK2      | 0.3740058  |
| GALNT11    | 0.79941463 |
| GALNT12    | 0.8418255  |
| GALNT18    | 0.45154238 |
| GALNT5     | 0.25157905 |
| GALNT6     | 0.46086788 |
| GALNT7     | 0.23408985 |
| GALNTL5    | 0.8073683  |
| GAR1       | 0.4627161  |
| GARS       | 0.28445148 |
| GAS7       | 0.57047415 |
| GAST       | 1.106466   |
| GATA3      | 0.53840923 |
| GATA4      | 1.460681   |
| GBP10      | 1.1818476  |
| GBP2       | 0.73166275 |
| GBP3       | 0.7549586  |
| GBP4       | 1.3674421  |
| GBP5       | 2.6127887  |
| GBP6       | 1.4949718  |
| GBP7       | 0.75526476 |
| GBP9       | 0.7511864  |
| GBX1       | 1.3666704  |
| GC         | 0.5214932  |
| GCA        | 0.19509673 |
| GCAT       | 0.681993   |
| GCG        | 3.0153584  |
| GCK        | 0.62459636 |
| GCM1       | 0.9196849  |
| GCNT2      | 1.0324917  |
| GCSAM      | 0.6164479  |
| GCSH       | 0.2194395  |
| GDAP10     | 2.0893412  |
| GDF15      | 3.4148464  |

|          |            |
|----------|------------|
| GDF7     | 1.1121876  |
| GEM      | 2.1451592  |
| GFI1     | 0.9153919  |
| GFPT1    | 0.36287165 |
| GFPT2    | 0.9099965  |
| GFRA3    | 1.2837589  |
| GGCT     | 0.62827444 |
| GGNBP1   | 0.7297485  |
| GGPS1    | 0.22297716 |
| GGT1     | 2.9382112  |
| GGT5     | 0.5160711  |
| GGT7     | 0.7110281  |
| GGTA1    | 0.72254467 |
| GH       | 0.38226533 |
| GIMAP1   | 0.72116375 |
| GIMAP1OS | 0.82115006 |
| GIMAP3   | 0.97073793 |
| GIMAP4   | 0.9667411  |
| GIMAP5   | 1.2346096  |
| GIMAP6   | 0.8436508  |
| GIMAP8   | 1.2024612  |
| GIMAP9   | 0.7798052  |
| GIPC3    | 0.963439   |
| GIT2     | 0.4900527  |
| GJA4     | 0.837461   |
| GJA8     | 0.66732717 |
| GJB1     | 0.7388735  |
| GJC1     | 0.28977776 |
| GJC2     | 1.8252931  |
| GJD3     | 1.648987   |
| GK5      | 0.2772379  |
| GLA      | 0.4651432  |
| GLI1     | 1.6821253  |
| GLRX3    | 0.37213182 |
| GLTSCR1  | 0.7410562  |
| GM10099  | 2.4110694  |
| GM101    | 2.04247    |
| GM10153  | 3.0376186  |
| GM10228  | 0.5914211  |
| GM10252  | 0.22481918 |
| GM10278  | 2.8767903  |
| GM10286  | 0.64591146 |
| GM10334  | 8.40825    |
| GM10369  | 1.0113964  |
| GM10389  | 0.9365792  |

|         |            |
|---------|------------|
| GM10398 | 1.0896053  |
| GM10403 | 1.029769   |
| GM10433 | 1.0287435  |
| GM10435 | 0.90954447 |
| GM10436 | 0.8833504  |
| GM10445 | 1.1241791  |
| GM10461 | 1.0375133  |
| GM10466 | 0.849622   |
| GM10471 | 0.88504744 |
| GM10510 | 1.2787752  |
| GM10513 | 1.243825   |
| GM10532 | 0.51041055 |
| GM10556 | 0.83285236 |
| GM10563 | 1.1643972  |
| GM10579 | 1.0451822  |
| GM10584 | 0.35534072 |
| GM10589 | 1.0830638  |
| GM10615 | 0.24018693 |
| GM10631 | 0.41692543 |
| GM10634 | 2.3836687  |
| GM10640 | 0.23978305 |
| GM10673 | 3.024167   |
| GM10674 | 1.5065548  |
| GM10696 | 1.8242819  |
| GM1070  | 0.23431301 |
| GM10700 | 1.0399783  |
| GM10703 | 0.88644576 |
| GM10741 | 0.7026768  |
| GM10747 | 1.3937781  |
| GM10777 | 0.556324   |
| GM10789 | 0.9315803  |
| GM10791 | 1.2639995  |
| GM10792 | 0.9687829  |
| GM10796 | 0.68206334 |
| GM10814 | 0.6143875  |
| GM10836 | 1.0925014  |
| GM10839 | 3.8461192  |
| GM10845 | 0.40313148 |
| GM10847 | 0.8086896  |
| GM10851 | 2.428845   |
| GM10867 | 0.91906905 |
| GM10869 | 0.2683246  |
| GM10872 | 0.23233986 |
| GM1110  | 0.8494501  |
| GM11110 | 0.8647895  |

|         |            |
|---------|------------|
| GM11123 | 0.42485523 |
| GM11346 | 0.84443617 |
| GM11437 | 0.9094901  |
| GM11544 | 0.8161919  |
| GM11696 | 0.45777035 |
| GM11735 | 1.2419448  |
| GM11747 | 0.67523766 |
| GM11974 | 0.9210887  |
| GM11992 | 1.2749405  |
| GM12    | 1.1158149  |
| GM12185 | 1.0452831  |
| GM12250 | 1.4219441  |
| GM12253 | 1.0388224  |
| GM12302 | 0.827152   |
| GM12503 | 0.8800416  |
| GM12569 | 0.51784205 |
| GM12592 | 1.3776913  |
| GM12693 | 0.30954933 |
| GM12758 | 0.25646138 |
| GM128   | 0.819087   |
| GM13011 | 10.15542   |
| GM1305  | 0.89095926 |
| GM13088 | 0.7467234  |
| GM13238 | 0.72536993 |
| GM13262 | 0.65201664 |
| GM13271 | 0.24625087 |
| GM13298 | 0.37848043 |
| GM13375 | 0.99071026 |
| GM13546 | 0.9036095  |
| GM13889 | 3.1231751  |
| GM13931 | 0.8653445  |
| GM14005 | 1.5429788  |
| GM14010 | 1.6558573  |
| GM14015 | 1.3930626  |
| GM14085 | 0.7599611  |
| GM14129 | 1.2269483  |
| GM14308 | 0.5040097  |
| GM14317 | 0.9492183  |
| GM14321 | 1.6808939  |
| GM14420 | 0.7853074  |
| GM14446 | 1.3002577  |
| GM14486 | 0.59215903 |
| GM14496 | 1.3741314  |
| GM14499 | 1.341789   |
| GM14762 | 0.4242065  |

|         |            |
|---------|------------|
| GM14851 | 0.8779981  |
| GM14858 | 0.39030838 |
| GM15056 | 2.605391   |
| GM15232 | 0.3218856  |
| GM15340 | 1.011545   |
| GM15401 | 0.37937403 |
| GM15413 | 0.9219887  |
| GM15421 | 0.41396666 |
| GM15455 | 0.30335808 |
| GM15478 | 0.62429    |
| GM15628 | 0.63735294 |
| GM15698 | 0.3894279  |
| GM15762 | 1.4672682  |
| GM15772 | 0.57300806 |
| GM15821 | 0.94837356 |
| GM15850 | 1.105464   |
| GM15998 | 1.146297   |
| GM16340 | 0.90192556 |
| GM16390 | 0.8607733  |
| GM16486 | 1.737524   |
| GM16489 | 1.1667433  |
| GM16491 | 0.4350369  |
| GM16498 | 1.0014558  |
| GM16505 | 1.9649873  |
| GM16523 | 0.62023735 |
| GM16524 | 0.46453738 |
| GM16863 | 1.3715024  |
| GM16982 | 1.59898    |
| GM17244 | 0.9103894  |
| GM17739 | 1.0723968  |
| GM17753 | 0.8194964  |
| GM17778 | 0.5775919  |
| GM17821 | 1.2763395  |
| GM1965  | 0.8966427  |
| GM1966  | 0.7181401  |
| GM1987  | 0.37803888 |
| GM2016  | 0.5494089  |
| GM20555 | 1.1189823  |
| GM20558 | 2.491267   |
| GM2061  | 0.5038171  |
| GM20611 | 1.382273   |
| GM20755 | 0.88513136 |
| GM20767 | 0.53058624 |
| GM20865 | 0.2858944  |
| GM21944 | 3.9974418  |

|         |            |
|---------|------------|
| GM21951 | 0.9587743  |
| GM2366  | 1.7687438  |
| GM2382  | 0.7591262  |
| GM2447  | 0.99769545 |
| GM2483  | 1.817992   |
| GM2511  | 1.9727252  |
| GM2545  | 2.0697203  |
| GM2590  | 0.7560172  |
| GM2675  | 1.0097218  |
| GM2701  | 0.68071604 |
| GM2824  | 0.48578334 |
| GM3032  | 0.8591256  |
| GM3081  | 1.229223   |
| GM3086  | 0.6620414  |
| GM3161  | 1.7538424  |
| GM318   | 0.92835116 |
| GM324   | 0.4603436  |
| GM3367  | 1.0758927  |
| GM3383  | 0.29384995 |
| GM3428  | 2.4484222  |
| GM3470  | 1.2008972  |
| GM3556  | 1.4704099  |
| GM3596  | 1.5344024  |
| GM3696  | 0.85165095 |
| GM3764  | 0.8780091  |
| GM3881  | 0.61294293 |
| GM3893  | 0.6300969  |
| GM3907  | 1.1120646  |
| GM3985  | 0.9263482  |
| GM4013  | 0.3640504  |
| GM4107  | 1.7072151  |
| GM4146  | 0.85382056 |
| GM4200  | 1.0628517  |
| GM4221  | 0.61895657 |
| GM4279  | 1.4910495  |
| GM4354  | 0.99846935 |
| GM4371  | 1.2036872  |
| GM4419  | 0.9939201  |
| GM4425  | 0.28559256 |
| GM4432  | 2.6420083  |
| GM4466  | 1.0176563  |
| GM4524  | 1.050415   |
| GM4544  | 0.35317564 |
| GM4559  | 0.45501542 |
| GM4567  | 1.1954618  |

|        |            |
|--------|------------|
| GM4610 | 1.6940784  |
| GM4745 | 0.9535551  |
| GM4755 | 1.1593091  |
| GM4759 | 0.5156679  |
| GM4787 | 0.7480619  |
| GM4832 | 0.40292883 |
| GM4841 | 1.5126753  |
| GM4850 | 1.0376315  |
| GM4861 | 0.6737771  |
| GM4884 | 0.6649842  |
| GM4907 | 0.9493499  |
| GM4924 | 0.5577874  |
| GM4925 | 0.5426047  |
| GM4951 | 0.98736143 |
| GM4956 | 0.40384078 |
| GM4971 | 0.76146984 |
| GM4975 | 1.0326796  |
| GM4983 | 0.9604778  |
| GM4994 | 1.8013799  |
| GM5    | 0.4692974  |
| GM5067 | 0.8896389  |
| GM5115 | 0.85119605 |
| GM5122 | 1.166296   |
| GM5129 | 1.3073864  |
| GM5134 | 1.2296023  |
| GM5150 | 0.2210145  |
| GM5174 | 0.9041078  |
| GM5331 | 0.72646713 |
| GM536  | 2.002653   |
| GM5409 | 8.222702   |
| GM5416 | 2.0414853  |
| GM5431 | 1.1910133  |
| GM5464 | 1.941602   |
| GM5468 | 0.48428416 |
| GM5483 | 2.5244212  |
| GM553  | 0.9574151  |
| GM5547 | 0.274518   |
| GM5590 | 2.18567    |
| GM5602 | 0.5532565  |
| GM5608 | 1.4984767  |
| GM5637 | 0.7974596  |
| GM5771 | 9.869521   |
| GM5833 | 0.6071031  |
| GM5858 | 0.4142084  |
| GM5878 | 1.2869172  |



|        |            |
|--------|------------|
| GM590  | 3.5289173  |
| GM5908 | 0.5558777  |
| GM5916 | 1.0514755  |
| GM5941 | 0.9947145  |
| GM5953 | 0.6512153  |
| GM597  | 1.128747   |
| GM614  | 1.6636312  |
| GM6146 | 1.2023511  |
| GM6219 | 0.20190454 |
| GM6252 | 0.61189365 |
| GM6287 | 1.1682332  |
| GM6306 | 0.5184252  |
| GM6377 | 3.0362554  |
| GM6402 | 0.79921603 |
| GM6403 | 1.3055394  |
| GM6460 | 0.7364123  |
| GM6524 | 0.21386385 |
| GM6537 | 1.0625479  |
| GM6566 | 1.013726   |
| GM6712 | 0.60466313 |
| GM6713 | 0.5339606  |
| GM6756 | 0.3771119  |
| GM684  | 0.95225024 |
| GM6904 | 1.5046601  |
| GM6943 | 0.9256897  |
| GM6961 | 0.9177866  |
| GM7111 | 0.361068   |
| GM7160 | 0.8265343  |
| GM7457 | 0.74098015 |
| GM7467 | 1.1068006  |
| GM7480 | 1.1359823  |
| GM7609 | 0.95476055 |
| GM7696 | 0.41172743 |
| GM7849 | 1.0597432  |
| GM7894 | 1.2617509  |
| GM805  | 1.054893   |
| GM8075 | 1.9080074  |
| GM813  | 0.8634238  |
| GM8221 | 0.34014845 |
| GM8273 | 0.47802734 |
| GM831  | 0.43795395 |
| GM8369 | 0.6398325  |
| GM8493 | 0.75699687 |
| GM8630 | 1.0590181  |
| GM8884 | 0.7185743  |

|         |            |
|---------|------------|
| GM8909  | 0.6373601  |
| GM8995  | 1.1430211  |
| GM9258  | 0.55227137 |
| GM9456  | 0.29470706 |
| GM9510  | 0.90793324 |
| GM9519  | 0.417516   |
| GM9564  | 1.5477557  |
| GM9693  | 0.5362778  |
| GM9706  | 2.325007   |
| GM9725  | 0.9927454  |
| GM9734  | 0.56743956 |
| GM9752  | 0.8986182  |
| GM9779  | 0.50168633 |
| GM9839  | 0.29492426 |
| GM9856  | 0.6175513  |
| GM9866  | 1.1671536  |
| GM9869  | 0.8474498  |
| GM9878  | 2.0788531  |
| GM9910  | 1.4755578  |
| GM9916  | 1.0049658  |
| GM9946  | 1.0918655  |
| GM9948  | 0.96896863 |
| GM9958  | 0.6811595  |
| GM9961  | 1.0866332  |
| GM9981  | 2.2634246  |
| GM9984  | 2.1440613  |
| GMCL1   | 0.2093153  |
| GMDS    | 0.4694047  |
| GMFG    | 0.38961458 |
| GMPPB   | 0.20050335 |
| GNA13   | 0.45335817 |
| GNAI1   | 0.8681202  |
| GNAI3   | 0.27142525 |
| GNB3    | 1.3350627  |
| GNG12   | 1.1089811  |
| GNG4    | 2.3555913  |
| GNGT1   | 0.8952031  |
| GNGT2   | 0.30074406 |
| GNL1    | 0.7583103  |
| GNL3    | 0.24737692 |
| GNMT    | 0.8245311  |
| GNPNAT1 | 0.67672014 |
| GNPTAB  | 0.44182587 |
| GOLGA1  | 0.24034452 |
| GOLGA3  | 0.39776325 |

|            |            |
|------------|------------|
| GOLGA4     | 0.8006873  |
| GON4L      | 0.19606781 |
| GOPC       | 0.6136384  |
| GORAB      | 0.26968765 |
| GOT1       | 0.6107416  |
| GP2        | 8.004887   |
| GP49A      | 2.024219   |
| GPANK1     | 0.25616455 |
| GPATCH4    | 1.0597105  |
| GPBAR1     | 0.435992   |
| GPHN       | 0.6592717  |
| GPM6B      | 0.68918514 |
| GPN1       | 0.2789178  |
| GPR110     | 1.8590674  |
| GPR113     | 0.91751313 |
| GPR114     | 0.5930095  |
| GPR126     | 1.743887   |
| GPR132     | 1.159051   |
| GPR137B    | 1.2294612  |
| GPR137B-PS | 1.1077371  |
| GPR151     | 0.90279794 |
| GPR171     | 2.0642962  |
| GPR179     | 1.8204007  |
| GPR18      | 1.5104012  |
| GPR183     | 1.2854056  |
| GPR21      | 1.1629412  |
| GPR26      | 0.6680093  |
| GPR31B     | 1.7614882  |
| GPR33      | 1.1440959  |
| GPR39      | 1.1982238  |
| GPR55      | 1.7454267  |
| GPR6       | 1.0661881  |
| GPR65      | 0.6129346  |
| GPR68      | 0.7275729  |
| GPR84      | 3.9447556  |
| GPR85      | 4.0348873  |
| GPRASP1    | 0.551291   |
| GPRC5A     | 0.48263073 |
| GPRIN2     | 0.56892085 |
| GPSM1      | 0.31245375 |
| GRAMD1A    | 1.2039905  |
| GRAMD1B    | 0.30765152 |
| GRAMD2     | 0.7245145  |
| GRAMD3     | 1.3497     |
| GRAP       | 0.374578   |

|                           |            |
|---------------------------|------------|
| GRHL1                     | 1.5680122  |
| GRIK2                     | 0.65978575 |
| GRM6                      | 1.6161463  |
| GRM8                      | 1.0925727  |
| GRPR                      | 2.2308514  |
| GRWD1                     | 0.36179447 |
| GSAP                      | 0.783175   |
| GSDMC4                    | 0.91602826 |
| GSTT4                     | 1.9211743  |
| GT(ROSA)26 <sup>Cre</sup> | 0.33968258 |
| GTF3C6                    | 0.2552104  |
| GTPBP4                    | 0.802083   |
| GTPBP6                    | 0.4535761  |
| GTSF1L                    | 0.9479244  |
| GUCY2D                    | 0.3395362  |
| GUCY2F                    | 2.1050682  |
| GVIN1                     | 0.7950492  |
| GYK                       | 1.5535793  |
| GYS2                      | 1.0958965  |
| GZF1                      | 0.22321558 |
| GZMA                      | 0.49520922 |
| GZMB                      | 1.849741   |
| GZMC                      | 2.5501878  |
| GZMK                      | 1.5701275  |
| H1FOO                     | 0.35535502 |
| H2AFY3                    | 0.21428776 |
| H2BFM                     | 0.90623856 |
| H2-DMB2                   | 0.7889972  |
| H2-EB2                    | 0.6371145  |
| H2-M11                    | 1.2582316  |
| H2-OB                     | 0.30329704 |
| H2-Q5                     | 0.83951855 |
| H2-T24                    | 0.90058756 |
| H60A                      | 1.9802628  |
| H60B                      | 2.0946007  |
| H6PD                      | 0.2607355  |
| HAAO                      | 0.28569126 |
| HABP2                     | 2.1501496  |
| HAMP                      | 1.0961108  |
| HAMP2                     | 0.29553962 |
| HAND1                     | 1.4155266  |
| HAP1                      | 0.22153234 |
| HAPLN3                    | 0.47352982 |
| HARS2                     | 0.44486332 |
| HAS1                      | 2.1909738  |

|           |            |
|-----------|------------|
| HAS2      | 3.5379071  |
| HAS2OS    | 1.921108   |
| HBEGF     | 2.53479    |
| HC        | 2.1360881  |
| HCAR2     | 0.3411126  |
| HCK       | 1.2153425  |
| HCLS1     | 0.6952486  |
| HCN3      | 1.0444121  |
| HDAC9     | 0.7936392  |
| HDC       | 2.231978   |
| HDGFRP3   | 0.452502   |
| HDX       | 1.8630612  |
| HEATR1    | 0.6720681  |
| HEATR3    | 0.67027044 |
| HECTD2    | 0.96704817 |
| HEG1      | 0.85707164 |
| HELZ2     | 1.6662903  |
| HEMT1     | 0.43263793 |
| HEPHL1    | 0.8504071  |
| HERC3     | 0.6685171  |
| HERC4     | 0.2481494  |
| HERC6     | 1.3402457  |
| HERPUD1   | 0.38078642 |
| HES2      | 0.44255805 |
| HES3      | 0.86978364 |
| HES5      | 1.5534897  |
| HEXIM2    | 0.3086667  |
| HHAT      | 0.69074106 |
| HHIPL2    | 2.1147778  |
| HIF1A     | 1.2982068  |
| HIGD1B    | 0.39343357 |
| HILPDA    | 1.6566896  |
| HIST1H1T  | 0.29032135 |
| HIST2H3C2 | 0.89941406 |
| HIVEP2    | 0.8596144  |
| HIVEP3    | 1.1008291  |
| HK2       | 0.76043844 |
| HKDC1     | 1.6335363  |
| HMCES     | 0.4835477  |
| HMGB4OS   | 0.5741875  |
| HMGXB3    | 0.491724   |
| HMOX1     | 2.3006387  |
| HNF4A     | 0.23273182 |
| HNRNPA2B1 | 0.42503643 |
| HNRNPH3   | 0.39811802 |

|          |            |
|----------|------------|
| HOOK1    | 0.22078443 |
| HOOK2    | 0.5256467  |
| HORMAD1  | 0.9273803  |
| HOXA5    | 0.98369837 |
| HOXA9    | 1.263469   |
| HOXC8    | 1.2394316  |
| HOXD3    | 1.1022875  |
| HP       | 1.5703201  |
| HPDL     | 0.40212464 |
| HPGDS    | 0.9741726  |
| HPS5     | 0.40331554 |
| HPS6     | 0.37440348 |
| HPX      | 1.1802309  |
| HRG      | 0.71034384 |
| HS3ST1   | 0.751951   |
| HSD17B13 | 0.80437803 |
| HSD17B2  | 1.5387497  |
| HSF1     | 0.26717424 |
| HSH2D    | 0.92406034 |
| HSP90AB1 | 0.4672227  |
| HSP90B1  | 0.34009457 |
| HSPA1A   | 3.166572   |
| HSPA5    | 0.7154889  |
| HSPA8    | 0.27772903 |
| HSPA9    | 0.25347948 |
| HSPB1    | 0.982038   |
| HSPB7    | 0.5088117  |
| HSPD1    | 0.41697264 |
| HSPE1    | 0.5982771  |
| HSPH1    | 0.6476755  |
| HTATSF1  | 0.70355463 |
| HTR1B    | 1.8455637  |
| HTR1D    | 1.1208084  |
| HTR2B    | 1.049176   |
| HTR3A    | 0.81709576 |
| HTR6     | 0.890892   |
| HTR7     | 2.3899918  |
| HTRA1    | 1.2747364  |
| HTT      | 0.5333023  |
| HVCN1    | 0.33572865 |
| HYKK     | 1.153265   |
| ICAM1    | 1.8613701  |
| ICOS     | 0.51219845 |
| ICOSL    | 0.72347975 |
| ID2      | 1.0023503  |

|          |            |
|----------|------------|
| IDI2     | 1.4647284  |
| IDO2     | 1.1313713  |
| IDUA     | 0.29877567 |
| IER2     | 0.6474471  |
| IER3     | 2.8957515  |
| IER5     | 0.6292839  |
| IER5L    | 0.5758405  |
| IFFO2    | 0.7138257  |
| IFI202B  | 1.566432   |
| IFI203   | 0.94172144 |
| IFI204   | 1.122077   |
| IFI27L2A | 0.25493002 |
| IFI35    | 0.8571696  |
| IFI44    | 2.045127   |
| IFI44L   | 6.042626   |
| IFI47    | 1.4566936  |
| IFIH1    | 1.6540141  |
| IFIT1    | 2.5585814  |
| IFIT2    | 1.5053778  |
| IFIT3    | 1.9094334  |
| IFITM1   | 1.2822189  |
| IFITM5   | 2.0217152  |
| IFITM6   | 0.53207827 |
| IFNA11   | 1.322186   |
| IFNA13   | 1.1165977  |
| IFNA2    | 1.3797648  |
| IFNA5    | 0.34543228 |
| IFNAB    | 0.711653   |
| IFNAR1   | 0.40117884 |
| IFNB1    | 4.2508535  |
| IFNG     | 2.2231216  |
| IFNGR2   | 0.40090704 |
| IFNK     | 0.7872491  |
| IFNLR1   | 1.0511222  |
| IFRD1    | 1.6451678  |
| IFT88    | 0.6984806  |
| IGF2     | 1.3397238  |
| IGF2BP2  | 0.23304248 |
| IGFLR1   | 0.4830289  |
| IGHV14-2 | 0.70406246 |
| IGKV4-55 | 1.0162156  |
| IGSF1    | 0.9439666  |
| IGSF23   | 2.2230773  |
| IGSF5    | 0.9069109  |
| IGSF6    | 0.6540475  |

|         |            |
|---------|------------|
| IGSF8   | 0.39193726 |
| IGTP    | 0.9592142  |
| IIGP1   | 1.37994    |
| IK      | 0.4066472  |
| IKBKE   | 1.7415485  |
| IKZF1   | 0.5040488  |
| IKZF4   | 0.7358551  |
| IL10    | 3.0187025  |
| IL10RA  | 0.21032095 |
| IL12B   | 4.635165   |
| IL12RB1 | 0.43586683 |
| IL12RB2 | 0.5335758  |
| IL13RA2 | 0.97303057 |
| IL15RA  | 0.35707092 |
| IL16    | 0.20706892 |
| IL17A   | 4.235691   |
| IL17RA  | 0.43265915 |
| IL17RB  | 0.7269478  |
| IL18    | 2.1502886  |
| IL18R1  | 0.2857585  |
| IL19    | 1.0189223  |
| IL1A    | 3.4575286  |
| IL1B    | 3.6146836  |
| IL1F9   | 2.921327   |
| IL1R1   | 0.7844062  |
| IL1R2   | 3.8958745  |
| IL1RAP  | 0.866173   |
| IL1RN   | 3.5188403  |
| IL2     | 1.6852891  |
| IL20RB  | 0.98528504 |
| IL21    | 1.0160687  |
| IL21R   | 0.87028074 |
| IL22    | 2.760804   |
| IL23A   | 2.2281535  |
| IL27    | 1.1113472  |
| IL27RA  | 1.009068   |
| IL2RA   | 1.5691333  |
| IL2RB   | 0.40103436 |
| IL2RG   | 0.66580486 |
| IL3     | 0.560683   |
| IL33    | 1.2640796  |
| IL4I1   | 1.5530481  |
| IL4RA   | 1.0030823  |
| IL6     | 7.7868     |
| IL7R    | 1.537682   |



|            |            |
|------------|------------|
| ILDR1      | 1.8686376  |
| IMAGE:6196 | 0.36754417 |
| IMP4       | 0.3011818  |
| IMPACT     | 0.46656513 |
| INADL      | 0.6224587  |
| ING3       | 0.36024904 |
| INHBA      | 1.2991824  |
| INHBB      | 3.5881553  |
| INHBE      | 1.0299551  |
| INIP       | 0.29577255 |
| INO80B     | 0.2934184  |
| INPP4B     | 0.5405457  |
| INPP5D     | 0.3787489  |
| INS1       | 3.1413305  |
| INS2       | 1.4089229  |
| INSM1      | 0.9572475  |
| INTS12     | 0.23821545 |
| INVS       | 0.7622924  |
| IPCEF1     | 1.1246233  |
| IPO4       | 0.48568964 |
| IQCF1      | 1.1394382  |
| IQCF4      | 1.6602156  |
| IQCJ       | 1.1356654  |
| IQCK       | 1.3010633  |
| IRAK3      | 1.9714689  |
| IRAK4      | 0.5152557  |
| IRF1       | 1.1671348  |
| IRF4       | 0.3209195  |
| IRF7       | 0.86910915 |
| IRF9       | 0.5210638  |
| IRG1       | 4.018429   |
| IRGM1      | 1.0887694  |
| IRGM2      | 0.829474   |
| IRX3       | 2.1959276  |
| ISG15      | 1.8438182  |
| ISM2       | 0.9300678  |
| ISOC1      | 0.455194   |
| ISOC2B     | 0.48464298 |
| ITGA1      | 0.49841166 |
| ITGA10     | 0.87588763 |
| ITGA5      | 0.86451197 |
| ITGA7      | 0.5563464  |
| ITGA9      | 0.7671995  |
| ITGAL      | 1.4179974  |
| ITGAV      | 0.77520037 |

|         |            |
|---------|------------|
| ITIH4   | 3.8565283  |
| ITK     | 1.6315999  |
| ITLN1   | 0.38160706 |
| ITLNB   | 1.1281545  |
| ITPKC   | 0.66672087 |
| ITPR2   | 0.51813316 |
| ITPR3   | 0.7721591  |
| ITPR3OS | 0.9567015  |
| ITPRIP  | 0.6793585  |
| IWS1    | 0.44867706 |
| JADE2   | 0.7079954  |
| JAK1    | 0.3892331  |
| JAK2    | 0.44616175 |
| JAK3    | 1.0145965  |
| JAKMIP1 | 0.26843357 |
| JAM2    | 1.1313319  |
| JDP2    | 1.0414853  |
| JMJD6   | 0.272727   |
| JUN     | 1.9825015  |
| JUNB    | 1.3763509  |
| KANK4   | 0.5307131  |
| KANSL3  | 0.37791014 |
| KATNA1  | 0.39375544 |
| KATNAL2 | 0.9595108  |
| KBTBD11 | 1.5358467  |
| KCNA10  | 0.88306475 |
| KCNC3   | 0.7793813  |
| KCNE3   | 0.86744857 |
| KCNE4   | 2.264451   |
| KCNG1   | 0.38933206 |
| KCNH7   | 1.571887   |
| KCNIP1  | 1.0607045  |
| KCNJ13  | 1.0901859  |
| KCNJ15  | 0.3962624  |
| KCNJ2   | 1.0262032  |
| KCNJ6   | 0.26038456 |
| KCNJ8   | 1.3235211  |
| KCNK10  | 1.7049477  |
| KCNK6   | 0.57058764 |
| KCNMB4  | 0.7086184  |
| KCNQ2   | 0.46711493 |
| KCNRG   | 0.6091962  |
| KCNS1   | 1.1960821  |
| KCTD11  | 0.65966797 |
| KCTD12  | 0.54933405 |

|         |            |
|---------|------------|
| KDF1    | 0.6699171  |
| KDM1B   | 0.42635632 |
| KDM2B   | 0.3077345  |
| KDM6B   | 1.1510439  |
| KHDC3   | 0.7830982  |
| KIF12   | 1.8024111  |
| KIF1A   | 0.6557193  |
| KIF1B   | 0.35391426 |
| KIF21A  | 0.3878224  |
| KIF21B  | 0.17693806 |
| KIF27   | 0.90723896 |
| KIRREL  | 0.43871427 |
| KIRREL3 | 0.5740547  |
| KL      | 1.1706867  |
| KLC2    | 0.5810919  |
| KLF17   | 0.43051577 |
| KLF6    | 0.74262    |
| KLF7    | 0.91564655 |
| KLHDC1  | 0.41516662 |
| KLHDC4  | 0.80127    |
| KLHL10  | 0.8000798  |
| KLHL2   | 0.8376818  |
| KLHL21  | 0.59521675 |
| KLHL28  | 0.4712715  |
| KLHL3   | 0.473289   |
| KLHL35  | 0.71353483 |
| KLHL6   | 1.1881185  |
| KLK1    | 3.45372    |
| KLK10   | 0.7849927  |
| KLK15   | 0.92779446 |
| KLK1B1  | 1.2303994  |
| KLK1B11 | 1.2102678  |
| KLK1B22 | 1.08378    |
| KLK1B24 | 2.176187   |
| KLK1B26 | 3.6584487  |
| KLK1B3  | 3.1917448  |
| KLK1B4  | 3.419353   |
| KLK1B5  | 3.9660907  |
| KLK1B8  | 2.8670135  |
| KLK4    | 0.82385993 |
| KLK8    | 0.6400709  |
| KLK9    | 0.57112527 |
| KLRA2   | 2.1018815  |
| KLRA5   | 0.44476962 |
| KLRB1B  | 0.5323348  |

|            |            |
|------------|------------|
| KLRC2      | 1.6711879  |
| KLRE1      | 0.43539953 |
| KMT2A      | 0.7185173  |
| KMT2C      | 0.26267004 |
| KMT2D      | 0.59800386 |
| KNG1       | 1.1340101  |
| KPNA4      | 0.5666046  |
| KRBA1      | 0.290164   |
| KRCC1      | 0.3377018  |
| KRI1       | 0.77014875 |
| KRR1       | 0.4196391  |
| KRT13      | 1.2232327  |
| KRT16      | 2.21109    |
| KRT17      | 0.9450841  |
| KRT26      | 1.5984442  |
| KRT31      | 1.3082867  |
| KRT33B     | 1.279192   |
| KRT6A      | 1.416513   |
| KRT72      | 0.7797451  |
| KRT86      | 0.33108473 |
| KRTAP10-4  | 0.7075739  |
| KRTAP11-1  | 1.4083478  |
| KRTAP1-4   | 1.8209424  |
| KRTAP16-3  | 0.8723345  |
| KRTAP26-1  | 1.1204188  |
| KRTAP28-13 | 0.81192327 |
| KRTAP3-1   | 0.98210764 |
| KRTAP4-1   | 1.6271541  |
| KRTAP5-5   | 0.2592559  |
| KRTAP9-3   | 1.1820433  |
| KRTCAP2    | 0.18838167 |
| KRTCAP3    | 0.28854847 |
| KSR1       | 0.51990676 |
| KTN1       | 0.40526676 |
| L1TD1      | 0.9334631  |
| L3MBTL3    | 0.42720175 |
| L7RN6      | 0.24436283 |
| LACC1      | 1.434555   |
| LACTBL1    | 1.0592296  |
| LAD1       | 3.3554406  |
| LAMA5      | 1.325377   |
| LAMB3      | 0.6836319  |
| LAMC1      | 0.36872816 |
| LAMC2      | 2.1937318  |
| LAMTOR2    | 0.9322915  |

|         |            |
|---------|------------|
| LAMTOR3 | 0.1795783  |
| LANCL3  | 0.5195744  |
| LAPTM4B | 0.4371972  |
| LAPTM5  | 0.29723644 |
| LARP1   | 0.34737253 |
| LARP4   | 0.37879467 |
| LAT     | 0.65722466 |
| LATS2   | 0.4097376  |
| LAX1    | 0.42555857 |
| LCA5    | 1.4278808  |
| LCE1B   | 0.62571526 |
| LCE3B   | 0.5626602  |
| LCK     | 0.37172508 |
| LCN2    | 0.51512957 |
| LCN6    | 0.76966214 |
| LCP1    | 0.6622634  |
| LDHA    | 0.5007243  |
| LDHD    | 2.190104   |
| LEF1    | 0.6050749  |
| LEFTY2  | 0.7350457  |
| LELP1   | 0.47049236 |
| LENG1   | 0.49911833 |
| LENG9   | 0.36804342 |
| LETM2   | 0.5945661  |
| LGALS8  | 0.6023183  |
| LGI2    | 0.46188712 |
| LGR4    | 1.1725333  |
| LHB     | 0.9253354  |
| LHX6    | 0.56784296 |
| LIF     | 3.2432673  |
| LIG4    | 0.29866457 |
| LILRB4  | 1.716013   |
| LIMA1   | 0.43220186 |
| LIMD2   | 0.19570017 |
| LIME1   | 0.2892537  |
| LIMK2   | 0.9257579  |
| LIPC    | 0.8500483  |
| LIPG    | 3.8304813  |
| LIPH    | 0.4422524  |
| LIPO1   | 0.41672325 |
| LIPT1   | 0.26276064 |
| LITAF   | 0.5255084  |
| LIX1L   | 0.7768476  |
| LMAN2L  | 0.28135395 |
| LMBR1L  | 0.770823   |

|             |            |
|-------------|------------|
| LMBRD1      | 0.21281528 |
| LMBRD2      | 0.6092949  |
| LMO4        | 0.51315594 |
| LMX1B       | 0.7233019  |
| LNPEP       | 0.9982953  |
| LNK1        | 0.69275904 |
| LNK2        | 0.25611353 |
| LOC10004170 | 0.882952   |
| LOC10086170 | 0.20747662 |
| LOC10105580 | 1.8112738  |
| LOC10105620 | 0.5811095  |
| LOC10105620 | 0.72299385 |
| LOC10105620 | 0.9348972  |
| LOC10263210 | 0.4770651  |
| LOC10263240 | 0.23065186 |
| LOC10263320 | 0.6783438  |
| LOC10263360 | 0.40355062 |
| LOC10263360 | 0.4227214  |
| LOC10263370 | 1.1667204  |
| LOC10263370 | 0.86381674 |
| LOC10263380 | 0.40714598 |
| LOC10263440 | 0.31969404 |
| LOC10263610 | 1.6847446  |
| LOC10263670 | 1.715255   |
| LOC10263670 | 0.6276698  |
| LOC10263690 | 0.75268626 |
| LOC10263690 | 1.4663358  |
| LOC10263770 | 0.7800596  |
| LOC10263800 | 0.8712344  |
| LOC10263880 | 0.92912316 |
| LOC10263910 | 0.76989746 |
| LOC10263920 | 1.2107291  |
| LOC10263950 | 2.2104282  |
| LOC10263970 | 1.2135386  |
| LOC10263980 | 1.2047503  |
| LOC10264130 | 0.39923286 |
| LOC10264150 | 0.19225168 |
| LOC10264160 | 0.91591287 |
| LOC10264230 | 1.1073108  |
| LOC10264230 | 4.290121   |
| LOC10264240 | 1.493187   |
| LOC10264240 | 0.8411348  |
| LOC10264270 | 0.26947355 |
| LOC171588   | 1.8206642  |
| LOC553089   | 0.97903085 |

|           |            |
|-----------|------------|
| LOC553096 | 0.50034094 |
| LOC630751 | 1.8261127  |
| LOC675947 | 1.856575   |
| LONP2     | 0.34649086 |
| LOX       | 2.4381928  |
| LPAR1     | 1.2323623  |
| LPAR3     | 0.82839465 |
| LPGAT1    | 1.0999622  |
| LPHN3     | 0.60454655 |
| LPO       | 2.1694388  |
| LPP       | 0.39649153 |
| LPXN      | 0.93796444 |
| LRCH1     | 0.4811821  |
| LRCH3     | 0.5159397  |
| LRFN1     | 0.41318607 |
| LRFN5     | 1.4370372  |
| LRG1      | 1.0355306  |
| LRIF1     | 0.26105666 |
| LRP11     | 0.3958571  |
| LRP8OS1   | 0.65322685 |
| LRRC16A   | 0.4632926  |
| LRRC2     | 0.37239742 |
| LRRC24    | 0.8762796  |
| LRRC25    | 0.9211068  |
| LRRC38    | 0.7198067  |
| LRRC45    | 0.21460867 |
| LRRC51    | 0.79894996 |
| LRRC59    | 0.20063877 |
| LRRC71    | 0.8519268  |
| LRRC8E    | 0.5879705  |
| LRRK1     | 0.47043324 |
| LRRK2     | 0.83158445 |
| LRRTM2    | 1.2898104  |
| LRTM2     | 1.1034448  |
| LSM12     | 0.19129753 |
| LTA       | 0.7635517  |
| LTK       | 0.5876062  |
| LTV1      | 0.38041162 |
| LUC7L     | 0.2315588  |
| LUC7L3    | 0.30865717 |
| LY6A      | 1.1092858  |
| LY6C1     | 0.46435452 |
| LY6D      | 0.17630243 |
| LY6G5B    | 0.35607505 |
| LY6K      | 1.2277923  |

|          |            |
|----------|------------|
| LY75     | 0.86425567 |
| LY86     | 0.610857   |
| LY9      | 0.501739   |
| LY96     | 0.63618517 |
| LYN      | 1.2226291  |
| LYPD3    | 1.0029125  |
| LYPD5    | 1.2254307  |
| LYSMD2   | 0.66438437 |
| LYVE1    | 2.4621248  |
| LZIC     | 0.50940275 |
| MAB21L3  | 2.0585947  |
| MADCAM1  | 1.162663   |
| MAFF     | 3.5295448  |
| MAGEA8   | 1.0254209  |
| MAGEB1   | 0.61940646 |
| MAGI3    | 0.4701965  |
| MAGIX    | 0.7746868  |
| MAGOHB   | 0.31102467 |
| MAK16    | 0.1809926  |
| MAL2     | 1.6114888  |
| MALT1    | 1.9365711  |
| MAMDC4   | 0.9258559  |
| MAMSTR   | 1.0687871  |
| MAN1A    | 0.27252436 |
| MAN2A1   | 0.5810199  |
| MAN2C1OS | 0.31816196 |
| MAP10    | 0.3740964  |
| MAP2K1   | 0.575624   |
| MAP3K1   | 0.24604177 |
| MAP3K19  | 1.6582417  |
| MAP3K2   | 0.3439293  |
| MAP3K6   | 0.73636675 |
| MAP3K7   | 0.3022437  |
| MAP3K8   | 2.2708101  |
| MAP4K4   | 0.7238984  |
| MAP7D2   | 1.3953817  |
| MAPK11   | 0.5933237  |
| MAPK1IP1 | 0.56831074 |
| MAPK6    | 0.636055   |
| MAPK7    | 0.17284966 |
| MAPK8IP3 | 0.31309128 |
| MAPKAPK2 | 0.74232197 |
| MARCKS   | 1.2756772  |
| MARCKSL1 | 2.2557874  |
| MARCO    | 2.322536   |



|          |            |
|----------|------------|
| MARF1    | 0.50981    |
| MASP2    | 1.5807343  |
| MAT1A    | 4.892556   |
| MB21D1   | 0.37654018 |
| MB21D2   | 1.1693692  |
| MBD1     | 2.3472137  |
| MBL1     | 0.47759914 |
| MBOAT1   | 0.2798376  |
| MBTPS2   | 0.33041382 |
| MCEMP1   | 1.0347939  |
| MCIDAS   | 0.36704683 |
| MCMBP    | 0.30184412 |
| MCOLN1   | 0.42152405 |
| MCPT9    | 0.9315312  |
| MCTP2    | 0.3691225  |
| MCTS2    | 0.43481207 |
| MDFIC    | 0.8652215  |
| MDM4     | 0.9951496  |
| MDN1     | 0.9535103  |
| ME3      | 1.4200976  |
| MED1     | 0.33406448 |
| MED10    | 0.2902465  |
| MEF2B    | 0.57167387 |
| MEFV     | 2.3576398  |
| MESDC1   | 0.7029898  |
| METTL17  | 0.337219   |
| METTL21C | 1.1691511  |
| METTL23  | 0.5531864  |
| METTL3   | 0.4613123  |
| METTL7A1 | 0.4149449  |
| METTL7A2 | 0.5935807  |
| MEX3A    | 0.50509334 |
| MFGE8    | 0.38102007 |
| MFNG     | 0.3629322  |
| MFSD1    | 0.28266716 |
| MFSD2A   | 1.7594113  |
| MFSD4    | 1.168289   |
| MFSD6L   | 3.4645877  |
| MFSD7A   | 1.5253088  |
| MFSD7B   | 0.48340654 |
| MGAM     | 0.29477692 |
| MGARP    | 0.5869851  |
| MGAT4A   | 0.82314825 |
| MGEA5    | 0.7484431  |
| MGRN1    | 0.35924673 |

|          |            |
|----------|------------|
| MIA      | 1.7711322  |
| MICALL1  | 0.5571561  |
| MIDN     | 0.39285612 |
| MIER2    | 0.2978363  |
| MIF      | 0.27579165 |
| MIF4GD   | 0.6256609  |
| MINA     | 0.47831964 |
| MIR22HG  | 0.19834614 |
| MITD1    | 0.5947256  |
| MKKS     | 0.7185278  |
| MKS1     | 0.81568336 |
| MLKL     | 0.2870283  |
| MLLT11   | 0.64728403 |
| MLLT6    | 1.177649   |
| MLXIP    | 0.6848836  |
| MLXIPL   | 0.5374222  |
| MMAA     | 1.1405869  |
| MMP13    | 3.6239824  |
| MMP14    | 1.2270918  |
| MMP1B    | 0.97306013 |
| MMP24    | 0.9773567  |
| MMP25    | 0.71756315 |
| MMP3     | 4.6143565  |
| MMP8     | 2.1394944  |
| MNDA     | 1.710681   |
| MNDAL    | 1.0038257  |
| MNT      | 0.35420895 |
| MOB4     | 0.35440874 |
| MOGS     | 0.43193197 |
| MON1B    | 0.991282   |
| MOS      | 0.5846329  |
| MOV10    | 0.62090063 |
| MPP3     | 0.85497475 |
| MPP7     | 0.6847296  |
| MPZL2    | 1.555399   |
| MPZL3    | 0.48293233 |
| MRAS     | 0.8819952  |
| MREG     | 1.3927002  |
| MRFAP1   | 0.22275734 |
| MRGPRA2A | 1.2058039  |
| MRGPRA2B | 1.2093573  |
| MRGPRA5  | 0.97802925 |
| MRGPRA6  | 1.7533174  |
| MRGPRA7  | 0.99324036 |
| MROH1    | 0.57336164 |

|         |            |
|---------|------------|
| MROH7   | 0.91573954 |
| MRPL21  | 0.2660451  |
| MRPL24  | 0.23978376 |
| MRPL52  | 0.37224722 |
| MRPS18B | 0.2281909  |
| MRPS6   | 0.50091314 |
| MS4A1   | 0.26077223 |
| MS4A4A  | 2.553668   |
| MS4A4B  | 0.7467556  |
| MS4A4D  | 1.357307   |
| MS4A6B  | 1.2304692  |
| MS4A6C  | 0.85674095 |
| MS4A6D  | 3.1357121  |
| MS4A7   | 0.5248289  |
| MSANTD1 | 0.67763734 |
| MSGN1   | 2.3654695  |
| MSI1    | 2.2962575  |
| MSI2    | 0.34937477 |
| MSL3L2  | 0.34956717 |
| MSN     | 0.3114748  |
| MSR1    | 1.8303294  |
| MSX2    | 0.81318665 |
| MSX3    | 0.9544401  |
| MT1     | 2.1855965  |
| MT2     | 2.125935   |
| MT3     | 0.39711332 |
| MTDH    | 0.778399   |
| MTERFD2 | 0.21609306 |
| MTG2    | 0.25393248 |
| MTHFD2L | 0.7252052  |
| MTHFS   | 0.683239   |
| MTIF2   | 0.75264454 |
| MTM1    | 0.208673   |
| MTMR1   | 0.440495   |
| MTNR1B  | 0.19826627 |
| MUC20   | 0.6913729  |
| MVP     | 0.75451994 |
| MX1     | 2.38128    |
| MX2     | 2.7356563  |
| MXD1    | 0.6759095  |
| MYBBP1A | 0.5385847  |
| MYBL1   | 0.72899246 |
| MYBPC2  | 0.39729238 |
| MYBPC3  | 0.51581526 |
| MYBPH   | 0.40874743 |

|         |            |
|---------|------------|
| MYC     | 0.6991663  |
| MYD88   | 0.7676439  |
| MYEOV2  | 0.25716734 |
| MYH13   | 2.0827725  |
| MYH7    | 0.63436985 |
| MYH9    | 0.28156805 |
| MYLK2   | 0.30330753 |
| MYO10   | 0.94477034 |
| MYO1B   | 0.6774423  |
| MYO1E   | 0.69745064 |
| MYO1G   | 0.36054897 |
| MYRFL   | 1.2147083  |
| MYSM1   | 0.4468751  |
| N4BP1   | 1.0713274  |
| N4BP2   | 0.3343091  |
| N4BP2L2 | 0.36266184 |
| NAA20   | 0.2572298  |
| NAA25   | 0.7667265  |
| NAA30   | 0.413455   |
| NAB2    | 0.35381126 |
| NABP1   | 0.7374668  |
| NADK    | 0.910789   |
| NAF1    | 0.25309515 |
| NAIP1   | 0.41405582 |
| NAIP5   | 0.7294464  |
| NAIP6   | 0.45552874 |
| NAMPT   | 1.1046515  |
| NAPB    | 0.40180707 |
| NAPEPLD | 1.1692762  |
| NAPSA   | 0.6653156  |
| NAT10   | 0.47419024 |
| NCBP2   | 0.3715024  |
| NCF1    | 0.72144413 |
| NCF4    | 0.3871913  |
| NCK1    | 0.34001875 |
| NCKAP1L | 0.29678774 |
| NCL     | 0.61129093 |
| NCMAP   | 0.86045647 |
| ND4     | 0.26185226 |
| ND6     | 1.1036768  |
| NDEL1   | 0.34527397 |
| NDP     | 1.0423114  |
| NDRG1   | 0.7357683  |
| NDRG3   | 0.83313465 |
| NEB     | 2.908647   |

|           |            |
|-----------|------------|
| NEBL      | 1.1638322  |
| NECAP1    | 0.223423   |
| NEDD4L    | 0.47833252 |
| NEIL1     | 0.847466   |
| NEK6      | 0.70343065 |
| NEMF      | 0.22484636 |
| NEPN      | 0.89390254 |
| NEU1      | 0.592504   |
| NEURL1A   | 0.4574132  |
| NEURL3    | 0.663259   |
| NEUROD2   | 1.4989955  |
| NFATC1    | 0.5206857  |
| NFE2L1    | 0.35534668 |
| NFE2L2    | 0.29277706 |
| NFIL3     | 1.6342301  |
| NFKB1     | 0.9200554  |
| NFKB2     | 1.3144174  |
| NFKBIA    | 2.0004086  |
| NFKBIB    | 0.6005111  |
| NFKBID    | 0.89957    |
| NFKBIE    | 0.6565237  |
| NFKBIZ    | 2.3790174  |
| NGDN      | 0.18182659 |
| NGF       | 0.8468089  |
| NGFR      | 0.5039158  |
| NHLH1     | 0.3345611  |
| NHLRC1    | 0.30637813 |
| NINJ1     | 0.3218565  |
| NIP7      | 0.23996115 |
| NKAIN2    | 1.1932583  |
| NKTR      | 0.19206476 |
| NLN       | 0.22210693 |
| NLRC3     | 0.30985785 |
| NLRC4     | 0.9657941  |
| NLRC5     | 1.258419   |
| NLRP1B    | 0.8176739  |
| NLRP1C-PS | 0.2566719  |
| NLRP2     | 1.0301795  |
| NLRP3     | 2.4038475  |
| NME2      | 0.26486588 |
| NME5      | 1.016655   |
| NMI       | 0.64681816 |
| NMNAT1    | 0.89888763 |
| NMRK1     | 0.6448231  |
| NOBOX     | 0.7748203  |

|         |            |
|---------|------------|
| NOD1    | 0.4226141  |
| NOD2    | 1.6788135  |
| NOL11   | 0.3995328  |
| NOL8    | 0.18684816 |
| NOM1    | 0.42834616 |
| NOP2    | 0.3226366  |
| NOP58   | 0.48072338 |
| NOS2    | 1.3178439  |
| NOS3    | 0.5727143  |
| NOTCH1  | 1.8183808  |
| NOTCH2  | 0.27620792 |
| NOTUMOS | 1.1742849  |
| NOX1    | 1.6095579  |
| NOXA1   | 0.5976939  |
| NOXRED1 | 0.31620455 |
| NPAS1   | 0.86979914 |
| NPBWR1  | 0.8813765  |
| NPDC1   | 0.37068605 |
| NPEPPS  | 0.48055792 |
| NPFF    | 0.47062492 |
| NPHP4   | 0.70894027 |
| NPVF    | 1.0816376  |
| NPW     | 1.0046089  |
| NR1H3   | 1.1594286  |
| NR3C1   | 0.36478758 |
| NR4A1   | 1.2403183  |
| NR4A2   | 0.25953436 |
| NR4A3   | 2.851803   |
| NR5A2   | 1.0459614  |
| NR6A1   | 0.9277737  |
| NRD1    | 0.43652344 |
| NRG3OS  | 0.67658424 |
| NRP2    | 0.87213326 |
| NRROS   | 0.515049   |
| NRXN3   | 0.5542133  |
| NSD1    | 0.31098032 |
| NSF     | 0.60634613 |
| NSG2    | 0.5290456  |
| NSMAF   | 0.3187499  |
| NSMF    | 0.55938864 |
| NSUN4   | 0.37228727 |
| NSUN5   | 0.42744637 |
| NT5C3B  | 0.3074193  |
| NT5DC3  | 0.6304393  |
| NT5E    | 0.5028002  |

|            |            |
|------------|------------|
| NTNG2      | 0.7144122  |
| NTSR2      | 1.1790755  |
| NUB1       | 0.5246935  |
| NUDT13     | 0.29360008 |
| NUDT15     | 0.21971774 |
| NUDT17     | 1.7239652  |
| NUDT6      | 0.45641613 |
| NUFIP1     | 0.7802491  |
| NUFIP2     | 0.8437042  |
| NUGGC      | 0.93456316 |
| NUP153     | 0.31984997 |
| NUP210L    | 0.6109307  |
| NUP98      | 0.48609018 |
| NUPR1      | 2.1318922  |
| NUS1       | 0.5027585  |
| NXF1       | 0.35568047 |
| NXPE3      | 0.61977005 |
| NXPH4      | 0.43528104 |
| OACYL      | 0.6231251  |
| OAS1A      | 1.1575933  |
| OAS1B      | 0.35501814 |
| OAS1C      | 0.48803854 |
| OAS1D      | 0.77216434 |
| OAS1E      | 0.46877193 |
| OAS1F      | 1.134522   |
| OAS1G      | 1.2590001  |
| OAS2       | 1.8143187  |
| OAS3       | 0.310225   |
| OASL1      | 2.8415728  |
| OASL2      | 1.1569386  |
| OAZ3       | 0.71122956 |
| OBSCN      | 0.5141711  |
| OC90       | 0.42026138 |
| ODAM       | 1.0544641  |
| ODF3       | 0.83850884 |
| ODF3L1     | 2.108632   |
| OGDHL      | 1.0026445  |
| OGFR       | 0.62421083 |
| OLFM4      | 1.5098915  |
| OLFR1000   | 3.0053635  |
| OLFR1009   | 0.89439416 |
| OLFR1022   | 0.9896922  |
| OLFR1028   | 1.1870136  |
| OLFR1043   | 1.0018988  |
| OLFR104-PS | 1.514807   |

|             |            |
|-------------|------------|
| OLFR1057    | 0.68938446 |
| OLFR1062    | 0.85293484 |
| OLFR1085    | 0.575294   |
| OLFR1106    | 1.1283379  |
| OLFR1156    | 1.0121932  |
| OLFR1180    | 1.187154   |
| OLFR1193    | 0.8758762  |
| OLFR120     | 0.6640732  |
| OLFR1202    | 1.0240216  |
| OLFR1206    | 1.0013509  |
| OLFR121     | 1.1234918  |
| OLFR1220    | 1.5441728  |
| OLFR1221    | 0.868243   |
| OLFR1225    | 0.88760257 |
| OLFR1229    | 0.7288909  |
| OLFR123     | 1.0331044  |
| OLFR1257    | 0.9890833  |
| OLFR1258    | 0.6471584  |
| OLFR1260    | 1.0803142  |
| OLFR1279    | 1.1093659  |
| OLFR1280    | 1.4728861  |
| OLFR1284    | 1.001385   |
| OLFR1288    | 1.278846   |
| OLFR1289    | 0.88792634 |
| OLFR13      | 1.0394812  |
| OLFR1307    | 0.26061392 |
| OLFR1311    | 1.3859308  |
| OLFR1314    | 1.4833694  |
| OLFR1333    | 1.4499588  |
| OLFR1336    | 0.6189735  |
| OLFR1349    | 1.6126988  |
| OLFR1350    | 0.9219923  |
| OLFR1372-PS | 0.3340819  |
| OLFR1383    | 0.3504281  |
| OLFR1387    | 1.2323949  |
| OLFR1396    | 3.4365938  |
| OLFR1411    | 0.8143983  |
| OLFR1414    | 1.1151085  |
| OLFR1433    | 1.0031283  |
| OLFR1440    | 0.8663995  |
| OLFR1443    | 0.45599222 |
| OLFR147     | 1.0635853  |
| OLFR149     | 0.98244643 |
| OLFR15      | 3.3198981  |
| OLFR1509    | 2.1431887  |



|             |            |
|-------------|------------|
| OLFR152     | 0.7193079  |
| OLFR159     | 0.7078564  |
| OLFR164     | 0.87036014 |
| OLFR199     | 0.88384867 |
| OLFR2       | 1.0628207  |
| OLFR215     | 1.0991285  |
| OLFR224     | 0.37286568 |
| OLFR231     | 1.268609   |
| OLFR281     | 0.82975125 |
| OLFR29-PS1  | 1.1479988  |
| OLFR3       | 1.1024137  |
| OLFR324     | 0.6558249  |
| OLFR330     | 1.7231565  |
| OLFR353     | 0.80901194 |
| OLFR354     | 1.1234407  |
| OLFR356     | 1.0673342  |
| OLFR368     | 1.145756   |
| OLFR373     | 0.94239044 |
| OLFR376     | 0.8320348  |
| OLFR392     | 0.68004274 |
| OLFR411     | 1.2764792  |
| OLFR414     | 1.1341407  |
| OLFR418-PS1 | 1.1056054  |
| OLFR424     | 0.98572516 |
| OLFR426     | 0.9007616  |
| OLFR434     | 1.2496567  |
| OLFR441     | 2.132401   |
| OLFR456     | 0.39842963 |
| OLFR458     | 1.0682948  |
| OLFR47      | 0.9819677  |
| OLFR477     | 1.5446339  |
| OLFR48      | 2.2202258  |
| OLFR491     | 0.92038584 |
| OLFR523     | 1.2257664  |
| OLFR536     | 0.71942043 |
| OLFR543     | 1.9569364  |
| OLFR549     | 0.3331108  |
| OLFR550     | 0.8238716  |
| OLFR56      | 2.6278505  |
| OLFR566     | 1.696729   |
| OLFR571     | 1.197577   |
| OLFR572     | 1.7362394  |
| OLFR576     | 1.0783582  |
| OLFR617     | 1.0715561  |
| OLFR619     | 0.65302205 |

|         |            |
|---------|------------|
| OLFR620 | 0.9403653  |
| OLFR64  | 1.4844265  |
| OLFR640 | 1.0192475  |
| OLFR658 | 2.109233   |
| OLFR661 | 0.91757774 |
| OLFR668 | 1.2973776  |
| OLFR671 | 1.2661178  |
| OLFR686 | 0.82937765 |
| OLFR700 | 1.1482847  |
| OLFR702 | 1.2853692  |
| OLFR703 | 1.377506   |
| OLFR738 | 0.7843623  |
| OLFR74  | 0.5796027  |
| OLFR796 | 0.89326835 |
| OLFR801 | 0.9611175  |
| OLFR910 | 0.8826525  |
| OLFR913 | 0.51155806 |
| OLFR915 | 0.58466387 |
| OLFR933 | 1.256599   |
| OLFR934 | 0.92443204 |
| OLFR98  | 1.0939362  |
| OLFR994 | 1.3097968  |
| ONECUT1 | 0.7074876  |
| OOEP    | 0.9590261  |
| OPRM1   | 0.61963844 |
| ORAI1   | 0.31300116 |
| ORAI2   | 0.4982729  |
| ORM1    | 0.76409817 |
| ORM2    | 0.58158493 |
| OSBPL5  | 0.49814463 |
| OSBPL9  | 0.38407278 |
| OSM     | 0.85199237 |
| OSMR    | 1.2412467  |
| OTUD3   | 0.9007802  |
| OTUD4   | 0.63098145 |
| OTUD6B  | 0.4483869  |
| OTUD7B  | 0.31185412 |
| OTULIN  | 0.28370237 |
| OXCT2B  | 1.0042968  |
| OXR1    | 0.20288324 |
| P2RX5   | 1.539592   |
| P2RY10  | 1.6617694  |
| P2RY2   | 2.508089   |
| P4HA1   | 0.62530494 |
| P4HA2   | 1.3535478  |

|          |            |
|----------|------------|
| PAF1     | 0.21849489 |
| PAG1     | 1.1609554  |
| PAH      | 2.755082   |
| PAIP1    | 0.44162273 |
| PAM      | 0.35313082 |
| PANK3    | 1.5271373  |
| PANX1    | 0.63379335 |
| PAPD7    | 0.42523336 |
| PAPLN    | 1.6673913  |
| PAPPA    | 2.062869   |
| PAPSS2   | 0.3597064  |
| PAQR3    | 1.1747518  |
| PAQR8    | 0.2604475  |
| PARG     | 0.31753922 |
| PARM1    | 1.031815   |
| PARP10   | 1.2814307  |
| PARP11   | 1.0699658  |
| PARP12   | 1.2141814  |
| PARP14   | 1.5927868  |
| PARP3    | 1.4730477  |
| PARP6    | 0.53759575 |
| PARP8    | 0.33869553 |
| PARP9    | 1.0154681  |
| PARVA    | 0.2851014  |
| PAX7     | 1.3254507  |
| PBSN     | 0.5397332  |
| PCBP3    | 0.22820067 |
| PCDH15   | 0.19248796 |
| PCDH19   | 0.76970315 |
| PCDHGA10 | 0.6369827  |
| PCED1A   | 0.7310834  |
| PCGF5    | 0.893837   |
| PCNXL4   | 0.699579   |
| PCP2     | 0.25549006 |
| PDCD1    | 1.9777141  |
| PDCD1LG2 | 0.8378844  |
| PDCD4    | 0.57773924 |
| PDE10A   | 0.47617078 |
| PDE3A    | 0.58358884 |
| PDE3B    | 1.0196333  |
| PDE4B    | 1.3376775  |
| PDE4C    | 0.41143227 |
| PDE4D    | 0.3735335  |
| PDE4DIP  | 0.62782097 |
| PDE6G    | 0.49865985 |

|         |            |
|---------|------------|
| PDE8A   | 0.19398737 |
| PDF     | 0.30784512 |
| PDGFA   | 0.43289042 |
| PDGFB   | 0.28980398 |
| PDGFRA  | 0.44651842 |
| PDIA2   | 0.9292736  |
| PDIA3   | 0.59329414 |
| PDIA4   | 0.20174026 |
| PDIA5   | 0.2629814  |
| PDIA6   | 0.4985714  |
| PDK4    | 1.3761587  |
| PDLIM5  | 0.5490432  |
| PDXK    | 0.36639166 |
| PDYN    | 0.47123694 |
| PDZD2   | 0.7911072  |
| PDZRN4  | 1.08653    |
| PECAM1  | 0.3098302  |
| PELI1   | 1.2341318  |
| PELI3   | 1.3235369  |
| PER1    | 0.9437423  |
| PES1    | 0.9954753  |
| PET100  | 1.014452   |
| PEX11A  | 1.1592035  |
| PFKFB3  | 1.9762721  |
| PFKP    | 0.52067184 |
| PGA5    | 0.3769915  |
| PGAM1   | 0.38075686 |
| PGC     | 0.7484243  |
| PGLYRP2 | 0.82760525 |
| PGM3    | 0.38862038 |
| PGR     | 0.9716635  |
| PGS1    | 1.243639   |
| PHC2    | 0.42492867 |
| PHF11A  | 1.2805324  |
| PHF11B  | 1.481246   |
| PHF11C  | 1.7335076  |
| PHF11D  | 1.5241823  |
| PHF21B  | 0.5739529  |
| PHF8    | 0.35891104 |
| PHGDH   | 0.21761656 |
| PHLDA1  | 0.7774863  |
| PHOX2A  | 4.104809   |
| PHTF1OS | 0.5160639  |
| PHTF2   | 0.7572975  |
| PHXR4   | 0.43484235 |

|          |            |
|----------|------------|
| PI15     | 2.9278307  |
| PICK1    | 0.2938056  |
| PID1     | 1.0830474  |
| PIEZO1   | 1.0531292  |
| PIGC     | 0.34230042 |
| PIGR     | 1.1153135  |
| PIK3AP1  | 1.0657673  |
| PIK3C2A  | 0.40070224 |
| PIK3C2G  | 3.252628   |
| PIK3CD   | 0.36889696 |
| PIK3CG   | 0.60536575 |
| PIK3IP1  | 1.4414835  |
| PIK3R3   | 0.25750852 |
| PIK3R4   | 0.27770948 |
| PIK3R5   | 1.3595438  |
| PIK3R6   | 0.9713063  |
| PIKFYVE  | 0.43996    |
| PILRA    | 0.9184704  |
| PIM2     | 0.39572334 |
| PIM3     | 0.88595533 |
| PIP5K1A  | 1.7570362  |
| PIP5KL1  | 1.8619003  |
| PIPOX    | 1.0053656  |
| PIRA7    | 0.24317837 |
| PISD     | 0.41755104 |
| PISD-PS1 | 0.6240921  |
| PISD-PS3 | 0.85625744 |
| PITPNA   | 0.2519698  |
| PITX3    | 0.8540714  |
| PJA1     | 0.8426447  |
| PKD1L3   | 0.22708225 |
| PKDCC    | 0.4270773  |
| PKP2     | 0.6752913  |
| PLA1A    | 0.7978654  |
| PLA2G1B  | 5.3349805  |
| PLA2G4B  | 0.5353942  |
| PLA2R1   | 0.3914821  |
| PLAA     | 0.26083803 |
| PLAC8    | 0.3037076  |
| PLAGL1   | 0.5390601  |
| PLAUR    | 1.1805272  |
| PLCB4    | 0.63749456 |
| PLCD4    | 0.377625   |
| PLCG1    | 0.34619188 |
| PLCG2    | 0.22274733 |

|           |            |
|-----------|------------|
| PLCL1     | 0.90103793 |
| PLCXD2    | 1.1053143  |
| PLD5      | 0.5561614  |
| PLEK      | 1.1373439  |
| PLEKHA1   | 1.2568011  |
| PLEKHA3   | 0.82330847 |
| PLEKHA4   | 0.7042613  |
| PLEKHD1OS | 1.4050894  |
| PLEKHG2   | 0.4213357  |
| PLEKHG4   | 1.9932132  |
| PLEKHG6   | 1.051156   |
| PLEKHH1   | 0.23944712 |
| PLET1     | 3.433107   |
| PLK2      | 0.92404723 |
| PLK3      | 1.0463896  |
| PLOD2     | 0.7817445  |
| PLP1      | 1.2480526  |
| PLP2      | 0.22733879 |
| PLSCR1    | 0.73749685 |
| PLXNA3    | 0.27968884 |
| PLXNC1    | 0.5244026  |
| PLXND1    | 0.6968365  |
| PMAIP1    | 1.2797437  |
| PMEPA1    | 1.3766122  |
| PMFBP1    | 0.8601494  |
| PML       | 0.58847713 |
| PNLIP     | 10.761618  |
| PNLIPRP1  | 11.06337   |
| PNLIPRP2  | 7.56515    |
| PNMA2     | 1.5878596  |
| PNN       | 0.51086473 |
| PNO1      | 0.3803444  |
| PNP2      | 0.36333466 |
| PNPLA5    | 1.2899663  |
| POGK      | 0.8304651  |
| POGLUT1   | 0.4818573  |
| POLR3E    | 0.35029602 |
| POLR3F    | 0.2097764  |
| POM121L12 | 0.22317386 |
| POMC      | 1.0380216  |
| POMGNT1   | 0.50723696 |
| POP1      | 0.29816055 |
| PORCN     | 2.306036   |
| POT1B     | 1.6813388  |
| POU2AF1   | 1.0133047  |

|          |            |
|----------|------------|
| POU2F2   | 0.22243547 |
| POU3F1   | 0.3692727  |
| POU5F2   | 0.83288383 |
| PPA1     | 0.8305998  |
| PPARD    | 0.36499786 |
| PPCS     | 0.1874175  |
| PPEF2    | 0.6175015  |
| PPID     | 0.3698635  |
| PPM1F    | 0.3862157  |
| PPM1H    | 0.58294106 |
| PPM1N    | 0.76384735 |
| PPP1R10  | 0.30194354 |
| PPP1R12B | 0.31169343 |
| PPP1R16B | 0.53539085 |
| PPP1R18  | 0.3472352  |
| PPP1R1A  | 1.6804903  |
| PPP1R21  | 0.7094002  |
| PPP1R3D  | 0.46433687 |
| PPP1R3F  | 1.1801586  |
| PPP3CC   | 0.7646642  |
| PPP3R1   | 0.6312361  |
| PPP4R1   | 0.2384181  |
| PPP4R2   | 0.29078007 |
| PPRC1    | 0.20979238 |
| PPTC7    | 0.50877    |
| PPY      | 1.6916883  |
| PRAMEF8  | 0.5594144  |
| PRDM1    | 1.226932   |
| PRDM15   | 0.28545904 |
| PRDM9    | 0.9542239  |
| PRDX5    | 0.27569962 |
| PRDX6    | 0.24460125 |
| PRELID2  | 0.4329958  |
| PRF1     | 0.41717815 |
| PRIMA1   | 1.0721602  |
| PRKCB    | 0.33858776 |
| PRKCD    | 0.32718897 |
| PRKCE    | 0.55611515 |
| PRKCH    | 0.81404924 |
| PRKCI    | 0.1873827  |
| PRKCQ    | 0.71636057 |
| PRKCZ    | 0.55051756 |
| PRKD3    | 0.41633177 |
| PRKG2    | 0.8888824  |
| PRL2C1   | 1.9303937  |

|          |            |
|----------|------------|
| PRL2C5   | 0.6372814  |
| PRLH     | 1.779999   |
| PRLR     | 0.43642306 |
| PRM2     | 1.0962002  |
| PRMT1    | 0.5850353  |
| PRMT2    | 0.7313013  |
| PROC     | 0.5350957  |
| PROCR    | 2.1747088  |
| PROK2    | 4.2645335  |
| PRORS1   | 0.51482487 |
| PROSC    | 0.24804258 |
| PRP2     | 0.44273472 |
| PRPF31   | 0.36229277 |
| PRPF38B  | 0.5551486  |
| PRPS1L1  | 1.1237183  |
| PRPSAP1  | 0.26855755 |
| PRR15L   | 0.73797035 |
| PRR16    | 0.94182014 |
| PRR18    | 1.5412519  |
| PRR9     | 0.4426496  |
| PRSS1    | 9.876165   |
| PRSS12   | 0.30852842 |
| PRSS2    | 9.796787   |
| PRSS22   | 1.5038624  |
| PRSS23   | 1.6182871  |
| PRSS23OS | 1.5626884  |
| PRSS28   | 0.36679983 |
| PRSS29   | 0.49592495 |
| PRSS32   | 1.5816374  |
| PRSS36   | 0.7019565  |
| PRSS48   | 0.45872688 |
| PRSS51   | 0.56897783 |
| PRSS54   | 0.811151   |
| PRSS56   | 0.45703197 |
| PRSS8    | 1.142669   |
| PRUNE2   | 0.5125854  |
| PSEN2    | 0.33718872 |
| PSG16    | 0.7560668  |
| PSG19    | 0.9795759  |
| PSMA6    | 0.29688787 |
| PSMA7    | 0.23813677 |
| PSMB10   | 0.31059694 |
| PSME2B   | 0.35141563 |
| PSTPIP2  | 0.8655772  |
| PTAFR    | 1.825398   |



|           |            |
|-----------|------------|
| PTF1A     | 2.0939167  |
| PTGDR2    | 0.27877164 |
| PTGS2     | 4.569454   |
| PTHLH     | 1.7801924  |
| PTPN1     | 0.86186457 |
| PTPN13    | 0.44374275 |
| PTPN2     | 0.5313597  |
| PTPN22    | 1.3986869  |
| PTPN23    | 0.7461972  |
| PTPRH     | 1.9903934  |
| PTPRK     | 0.32387495 |
| PTPRM     | 1.0080357  |
| PTPRU     | 0.29331708 |
| PTPRZ1    | 0.4652865  |
| PTRH1     | 0.64309883 |
| PTX3      | 4.880314   |
| PUS3      | 0.46812105 |
| PUS7      | 0.48473978 |
| PUS7L     | 0.66038656 |
| PVALB     | 1.7597058  |
| PVR       | 1.6749706  |
| PVRL2     | 0.6657543  |
| PWP1      | 0.49908495 |
| PWP2      | 0.5022721  |
| PYDC3     | 1.68257    |
| PYDC4     | 2.6282473  |
| PYHIN1    | 1.481081   |
| PYY       | 0.6504977  |
| PZP       | 1.0802581  |
| QSOX1     | 0.48210955 |
| QTRT1     | 0.28616    |
| QTRTD1    | 0.39442587 |
| RAB11FIP1 | 0.9761472  |
| RAB11FIP2 | 0.43757558 |
| RAB12     | 0.18535948 |
| RAB15     | 1.5368428  |
| RAB19     | 0.24502182 |
| RAB20     | 2.0749683  |
| RAB27A    | 0.4907751  |
| RAB32     | 0.8068795  |
| RAB33B    | 0.2090764  |
| RAB3C     | 0.7253237  |
| RAB3IP    | 0.46318388 |
| RAB8B     | 0.22963667 |
| RABEP2    | 0.875443   |

|          |            |
|----------|------------|
| RABGAP1  | 0.5241926  |
| RABIF    | 0.54617643 |
| RAC3     | 0.50417805 |
| RAD21L   | 1.2034137  |
| RAI14    | 0.5507064  |
| RALGAPA1 | 0.25176334 |
| RALGDS   | 0.7871599  |
| RAMP3    | 1.7213168  |
| RAP1B    | 0.2570758  |
| RAP1GAP2 | 0.74735117 |
| RAP1GDS1 | 0.51752615 |
| RAP2A    | 0.6498461  |
| RAP2B    | 1.0386667  |
| RAPGEF2  | 1.5914574  |
| RAPGEF5  | 0.70726967 |
| RAPGEF6  | 0.5820055  |
| RAPH1    | 0.2669506  |
| RASA2    | 0.7406697  |
| RASA4    | 0.5160818  |
| RASAL3   | 0.5621686  |
| RASD1    | 2.2318583  |
| RASGEF1A | 0.57660294 |
| RASGEF1B | 1.6640015  |
| RASGRP1  | 0.48708677 |
| RASIP1   | 1.4814782  |
| RASSF1   | 0.26624966 |
| RASSF2   | 0.26836205 |
| RASSF6   | 0.90020347 |
| RAVER2   | 1.8449259  |
| RBAK     | 0.48583126 |
| RBM12B2  | 0.3045249  |
| RBM17    | 0.23766088 |
| RBM18    | 0.2880988  |
| RBM19    | 0.2984929  |
| RBM26    | 0.31414557 |
| RBM28    | 0.49181223 |
| RBM43    | 0.47595215 |
| RBM46OS  | 0.9830313  |
| RBM47    | 0.33300972 |
| RBM5     | 0.26064825 |
| RBMS1    | 0.76902723 |
| RBMS3    | 0.45391798 |
| RBPJ     | 0.28818512 |
| RBPJL    | 1.376322   |
| RCBTB1   | 0.32126617 |

|        |            |
|--------|------------|
| RCN1   | 0.41011238 |
| RCSD1  | 0.57792044 |
| RDH10  | 0.46208668 |
| RDH5   | 0.32887316 |
| REEP3  | 0.22949505 |
| REG1   | 12.62068   |
| REG2   | 11.986425  |
| REG3A  | 9.497173   |
| REG3B  | 11.766886  |
| REG3D  | 7.6326466  |
| REG3G  | 9.979157   |
| RELA   | 0.70981216 |
| RELB   | 1.4534655  |
| REPIN1 | 0.29902315 |
| RERGL  | 1.0620048  |
| REST   | 0.67314243 |
| RET    | 1.0565066  |
| REXO4  | 0.62813616 |
| RFESD  | 1.372509   |
| RFPL4  | 1.0631294  |
| RFT1   | 0.24167156 |
| RFTN1  | 0.7956829  |
| RFX5   | 0.35907388 |
| RGMA   | 2.6202168  |
| RGP1   | 0.35390496 |
| RGS1   | 2.580309   |
| RGS11  | 2.760117   |
| RGS13  | 1.3001661  |
| RGS16  | 1.2148533  |
| RGS4   | 1.9788551  |
| RGS6   | 0.5523603  |
| RGS9   | 1.015255   |
| RHBDF1 | 0.6752691  |
| RHBDF2 | 0.5397358  |
| RHOB   | 0.6650605  |
| RHOC   | 1.378025   |
| RHOQ   | 0.40303946 |
| RHOU   | 1.0370197  |
| RHOV   | 0.9270532  |
| RHOX2C | 1.6452737  |
| RHOX4E | 1.0501759  |
| RHOX4G | 1.1961629  |
| RHOX8  | 0.8178811  |
| RHPN1  | 0.3219123  |
| RIMKLB | 0.8628378  |

|            |            |
|------------|------------|
| RIMS2      | 1.4199231  |
| RIN3       | 0.87229276 |
| RIOK2      | 0.36854696 |
| RIPK2      | 0.97716165 |
| RIPK4      | 0.9972913  |
| RLF        | 0.9311938  |
| RLIM       | 0.5459614  |
| RLTPR      | 0.4379611  |
| RMRP       | 0.3890562  |
| RN18S      | 0.6742177  |
| RNASE1     | 8.002242   |
| RNASE9     | 1.275455   |
| RNASET2A   | 0.29032278 |
| RND1       | 2.5639658  |
| RNF103     | 0.32808447 |
| RNF111     | 0.25730228 |
| RNF112     | 1.1587408  |
| RNF114     | 0.7524471  |
| RNF121     | 0.52270555 |
| RNF122     | 1.4389231  |
| RNF125     | 0.5150542  |
| RNF149     | 1.0227394  |
| RNF151     | 1.1246984  |
| RNF157     | 1.123538   |
| RNF183     | 1.1767921  |
| RNF185     | 0.41545248 |
| RNF19B     | 1.1190305  |
| RNF2       | 0.3568492  |
| RNF213     | 1.7118602  |
| RNF217     | 0.31403947 |
| RNF31      | 0.39386272 |
| RNF44      | 0.23048687 |
| RNF6       | 0.2772231  |
| RNU1B6     | 0.99001837 |
| ROBO1      | 0.37750292 |
| ROBO4      | 0.30805826 |
| ROR2       | 1.2156935  |
| RPAP3      | 0.28046703 |
| RPGRIP1    | 0.7050414  |
| RPL22L1    | 0.4492793  |
| RPL39L     | 1.124917   |
| RPL4       | 0.24607229 |
| RPP38      | 0.33938837 |
| RPP40      | 0.36857963 |
| RPS15A-PS6 | 0.21790242 |

|          |            |
|----------|------------|
| RPS4L    | 0.23440075 |
| RPS6KC1  | 0.8580439  |
| RPTOROS  | 0.43075824 |
| RRAD     | 1.0524979  |
| RRAS2    | 0.622684   |
| RRBP1    | 0.26012135 |
| RRNAD1   | 0.37885618 |
| RRP12    | 0.5801625  |
| RRP15    | 0.38360214 |
| RRS1     | 0.7695837  |
| RS1      | 1.400435   |
| RS5-8S1  | 3.5988007  |
| RSAD1    | 0.997803   |
| RSAD2    | 0.81998396 |
| RSG1     | 1.0878444  |
| RSL1     | 0.7426009  |
| RSLCAN18 | 0.35254622 |
| RTBDN    | 0.5782969  |
| RTDR1    | 0.65130544 |
| RTP4     | 1.7671475  |
| RUFY2    | 0.78381777 |
| RUFY3    | 0.48268795 |
| RUNDC1   | 0.35818768 |
| RUNDC3B  | 2.0037508  |
| RUNX3    | 0.45424914 |
| RXFP1    | 0.6582446  |
| RXFP2    | 1.0395896  |
| RXFP3    | 0.67452574 |
| RYBP     | 0.39386463 |
| RYR3     | 1.6369071  |
| S100A4   | 0.17922688 |
| S100A8   | 0.535254   |
| S100PBP  | 0.39474058 |
| S1PR1    | 0.22872972 |
| S1PR2    | 0.39367437 |
| S1PR3    | 0.4662633  |
| SAA1     | 3.8346114  |
| SAA2     | 6.7606974  |
| SAA3     | 4.195894   |
| SAA4     | 0.2892053  |
| SAG      | 1.365694   |
| SAMD4B   | 0.6204052  |
| SAMD8    | 0.9310303  |
| SAMD9L   | 0.9072528  |
| SAMHD1   | 0.35956097 |

|           |            |
|-----------|------------|
| SAMSN1    | 1.5295138  |
| SAMT4     | 1.1312013  |
| SAP18     | 0.26271725 |
| SASH1     | 0.6464467  |
| SATB1     | 1.3931184  |
| SAV1      | 0.5989008  |
| SAYSD1    | 1.0936413  |
| SBDS      | 0.6672301  |
| SBNO2     | 0.93939734 |
| SCAF8     | 0.20798588 |
| SCD3      | 0.46453476 |
| SCGB1B30  | 0.79029584 |
| SCGB2B2   | 0.9699445  |
| SCGN      | 0.94696975 |
| SCHIP1    | 0.36197805 |
| SCIMP     | 0.61655235 |
| SCIN      | 1.1254554  |
| SCML4     | 1.4041767  |
| SCN11A    | 1.4346752  |
| SCN3A     | 0.75200176 |
| SCN3B     | 1.1425986  |
| SCN4B     | 0.5924897  |
| SCN5A     | 0.74988604 |
| SCO2      | 0.37598085 |
| SCRG1     | 0.47905326 |
| SCRT1     | 1.9987218  |
| SCX       | 0.37482882 |
| SCYL2     | 0.3562131  |
| SDAD1     | 1.6334591  |
| SDC4      | 3.5028167  |
| SDCBP2    | 0.24615693 |
| SDR42E1   | 0.61666775 |
| SEBOX     | 0.8134084  |
| SEC1      | 0.7001674  |
| SEC16A    | 0.33043623 |
| SEC24A    | 0.5232351  |
| SEC24B    | 0.47856045 |
| SEC24C    | 0.28155518 |
| SEC31A    | 0.2004013  |
| SEC63     | 0.3775487  |
| SECISBP2  | 0.3556695  |
| SECISBP2L | 0.865376   |
| SEL1L     | 0.23208141 |
| SELE      | 3.420521   |
| SELL      | 1.0155458  |

|           |            |
|-----------|------------|
| SELP      | 0.53108454 |
| SEMA3A    | 1.4363332  |
| SEMA3F    | 0.32876158 |
| SEMA3G    | 0.58904886 |
| SEMA4A    | 0.6285367  |
| SEMA4D    | 0.41111565 |
| SEMA7A    | 0.82956505 |
| SEPW1     | 0.3614092  |
| SERP1     | 0.5551424  |
| SERPINA10 | 1.6342707  |
| SERPINA1A | 0.3594284  |
| SERPINA1C | 0.35271263 |
| SERPINA1D | 0.24810648 |
| SERPINA1E | 0.2571416  |
| SERPINA3B | 0.32712364 |
| SERPINA3C | 1.7441998  |
| SERPINA3F | 2.254272   |
| SERPINA3G | 1.0286345  |
| SERPINA3I | 1.553926   |
| SERPINA3K | 1.1513762  |
| SERPINA3M | 1.2042713  |
| SERPINA3N | 2.3670697  |
| SERPINB1A | 0.24986553 |
| SERPINB6B | 0.73109484 |
| SERPINB9  | 0.78048897 |
| SERPINB9E | 1.0147123  |
| SERPINE1  | 4.005005   |
| SERPINE2  | 0.53162074 |
| SERPING1  | 0.23090696 |
| SERPINI1  | 1.1223245  |
| SERPINI2  | 7.0431514  |
| SERTAD3   | 1.5111213  |
| SESN3     | 0.66267204 |
| SESTD1    | 0.23010421 |
| SET       | 0.32551098 |
| SETBP1    | 0.31889558 |
| SETD2     | 0.1952982  |
| SETD4     | 0.8333359  |
| SETDB2    | 0.9776988  |
| SEZ6L2    | 0.5956242  |
| SF3B1     | 0.47066498 |
| SFI1      | 2.20676    |
| SFMBT2    | 0.897521   |
| SFPQ      | 0.22316885 |
| SFTPD     | 0.9079404  |

|          |            |
|----------|------------|
| SFXN2    | 0.7136011  |
| SGCB     | 0.42536688 |
| SGK1     | 1.2062683  |
| SGMS1    | 0.34913254 |
| SGPL1    | 0.2019968  |
| SGPP2    | 0.8390155  |
| SH2B2    | 0.91964483 |
| SH2B3    | 0.22634459 |
| SH2D1A   | 0.5877533  |
| SH2D1B2  | 1.1900203  |
| SH2D2A   | 1.0099335  |
| SH3BP2   | 0.5838003  |
| SH3BP4   | 0.43780613 |
| SH3BP5   | 0.65163517 |
| SH3GL3   | 1.2963939  |
| SH3KBP1  | 0.22881126 |
| SH3PXD2B | 0.75931454 |
| SHB      | 0.22855091 |
| SHISA3   | 4.2471404  |
| SHISA5   | 0.90438366 |
| SHMT1    | 0.7229593  |
| SIAH2    | 1.4793878  |
| SIDT1    | 0.48968792 |
| SIGLECE  | 0.33372974 |
| SIK1     | 0.97158337 |
| SIK3     | 0.61460114 |
| SIKE1    | 0.5080414  |
| SIMC1    | 0.6935458  |
| SIPA1L1  | 0.9238796  |
| SIS      | 1.2109256  |
| SIT1     | 0.47360277 |
| SKAP1    | 0.47094393 |
| SKAP2    | 0.5423322  |
| SKIL     | 0.9758215  |
| SKOR1    | 3.0807588  |
| SLA      | 0.82619    |
| SLA2     | 0.3469231  |
| SLC10A3  | 0.30827284 |
| SLC10A6  | 3.027766   |
| SLC12A3  | 1.6918383  |
| SLC12A5  | 0.46065164 |
| SLC15A2  | 1.7418747  |
| SLC15A3  | 1.5863318  |
| SLC15A4  | 0.51553726 |
| SLC16A1  | 0.2903707  |



|             |            |
|-------------|------------|
| SLC16A3     | 0.9522443  |
| SLC17A5     | 0.29524565 |
| SLC17A9     | 0.6369448  |
| SLC18A1     | 0.64471984 |
| SLC22A13B-P | 0.28273797 |
| SLC22A15    | 0.2053988  |
| SLC22A30    | 1.1841211  |
| SLC23A2     | 0.7702966  |
| SLC25A19    | 0.8827534  |
| SLC25A20    | 0.69845057 |
| SLC25A22    | 1.2930758  |
| SLC25A23    | 0.37447906 |
| SLC25A25    | 0.64568853 |
| SLC25A3     | 0.62834835 |
| SLC25A33    | 0.3670535  |
| SLC25A36    | 0.49317884 |
| SLC25A41    | 1.3998814  |
| SLC25A46    | 0.39721394 |
| SLC25A53    | 1.3612907  |
| SLC26A6     | 0.4826963  |
| SLC26A8     | 0.766057   |
| SLC26A9     | 1.8833036  |
| SLC27A2     | 1.2343771  |
| SLC28A1     | 0.2300663  |
| SLC28A2     | 0.75312424 |
| SLC2A1      | 1.0148916  |
| SLC2A12     | 0.5799608  |
| SLC2A4RG-PS | 0.83795977 |
| SLC2A6      | 1.9430213  |
| SLC2A7      | 1.2658024  |
| SLC30A3     | 1.1321797  |
| SLC30A4     | 0.84688044 |
| SLC30A6     | 0.3872838  |
| SLC30A7     | 0.2655847  |
| SLC31A2     | 0.72156096 |
| SLC35A1     | 0.20097542 |
| SLC35B1     | 0.29824638 |
| SLC35F1     | 0.91510916 |
| SLC35F2     | 1.0676327  |
| SLC35G3     | 0.74688625 |
| SLC36A2     | 0.39295626 |
| SLC37A3     | 0.30166245 |
| SLC38A3     | 0.9162514  |
| SLC39A1     | 0.63754654 |
| SLC39A14    | 2.3160214  |

|           |            |
|-----------|------------|
| SLC39A2   | 0.31385112 |
| SLC39A6   | 0.6606889  |
| SLC39A7   | 0.25202417 |
| SLC41A1   | 1.0820637  |
| SLC4A4    | 1.4100673  |
| SLC4A7    | 0.6676221  |
| SLC4A8    | 0.9144907  |
| SLC50A1   | 0.23382187 |
| SLC5A1    | 1.2230365  |
| SLC5A3    | 1.4586663  |
| SLC5A6    | 0.5397978  |
| SLC6A20B  | 1.1628528  |
| SLC6A7    | 0.93356276 |
| SLC7A11   | 1.0168555  |
| SLC7A2    | 1.3314414  |
| SLC7A6    | 1.0618637  |
| SLC7A6OS  | 0.5737176  |
| SLC8A3    | 0.72036076 |
| SLC9A8    | 0.41940165 |
| SLCO1B2   | 0.84140635 |
| SLCO3A1   | 0.93996716 |
| SLCO5A1   | 1.5482578  |
| SLFN1     | 1.2942896  |
| SLFN10-PS | 0.9212761  |
| SLFN2     | 1.105464   |
| SLFN3     | 0.34634113 |
| SLFN4     | 2.1105037  |
| SLFN8     | 1.7003131  |
| SLFN9     | 0.9468589  |
| SLMO1     | 0.5044217  |
| SMAD1     | 1.2172618  |
| SMAD2     | 0.54293585 |
| SMAD4     | 0.37993002 |
| SMAD7     | 1.0667577  |
| SMCHD1    | 0.40491152 |
| SMCR8     | 0.27674103 |
| SMEK2     | 0.23460436 |
| SMG1      | 0.18773794 |
| SMIM22    | 1.4696102  |
| SMIM3     | 0.62444067 |
| SMPDL3B   | 0.46589375 |
| SMPX      | 1.3030794  |
| SMR3A     | 0.37950015 |
| SMUG1     | 0.7584176  |
| SMURF1    | 0.39432716 |

|          |            |
|----------|------------|
| SMURF2   | 0.32484102 |
| SMYD2    | 0.20624876 |
| SNAI3    | 0.38219452 |
| SNAP23   | 0.39886093 |
| SNAP25   | 0.28423405 |
| SNAPC1   | 0.9053631  |
| SNAPC3   | 0.38524723 |
| SNAPC4   | 0.33671093 |
| SNAPC5   | 0.26611662 |
| SNHG12   | 0.47399855 |
| SNHG6    | 0.48388004 |
| SNHG7    | 0.22809172 |
| SNORA74A | 0.47373676 |
| SNRNP35  | 0.6033287  |
| SNRNP48  | 0.37157726 |
| SNRPA1   | 0.20280981 |
| SNTA1    | 1.4025116  |
| SNTB2    | 0.98213434 |
| SNX10    | 1.1313438  |
| SNX16    | 0.39564514 |
| SNX18    | 1.1177502  |
| SNX19    | 0.22755766 |
| SNX20    | 0.84163046 |
| SNX29    | 0.89128256 |
| SNX7     | 0.614207   |
| SNX8     | 0.5466256  |
| SOCS1    | 2.3679256  |
| SOCS2    | 0.20260286 |
| SOCS3    | 3.2041326  |
| SOD2     | 1.8772111  |
| SOD3     | 0.545506   |
| SOGA1    | 0.51023054 |
| SOGA3    | 1.0264168  |
| SOHLH1   | 1.3877635  |
| SOHLH2   | 0.594069   |
| SON      | 0.2254448  |
| SORBS1   | 0.7206416  |
| SORL1    | 1.3198628  |
| SOS1     | 1.6331842  |
| SOSTDC1  | 0.8552153  |
| SOWAHC   | 0.98603106 |
| SOX5     | 1.4814205  |
| SOX7     | 1.4943395  |
| SOX9     | 1.3813317  |
| SP100    | 0.5371723  |

|            |            |
|------------|------------|
| SP140      | 0.51891756 |
| SP5        | 0.90358806 |
| SP7        | 1.1677413  |
| SPAG11A    | 0.6755049  |
| SPAG16     | 1.5042009  |
| SPAG9      | 0.33635426 |
| SPATA1     | 0.3540802  |
| SPATA13    | 0.29392433 |
| SPATA21    | 1.5821846  |
| SPATA5     | 0.3364854  |
| SPATA5L1   | 1.3584335  |
| SPATS2     | 0.7063203  |
| SPCS2      | 0.36689663 |
| SPDEF      | 1.5443966  |
| SPDYA      | 0.53593874 |
| SPDYB      | 0.9439826  |
| SPEER3     | 1.0449393  |
| SPEER5-PS1 | 0.8228235  |
| SPEER9-PS1 | 0.89404106 |
| SPEF2      | 0.7090101  |
| SPI1       | 0.5434189  |
| SPIB       | 0.23071003 |
| SPIC       | 1.6042042  |
| SPIDR      | 0.36427498 |
| SPIN1      | 0.5937724  |
| SPINK12    | 0.9078772  |
| SPINK3     | 8.394373   |
| SPINK4     | 1.3048742  |
| SPINK6     | 0.8423848  |
| SPNS1      | 0.20964003 |
| SPOCD1     | 0.7296922  |
| SPON1      | 0.70943475 |
| SPPL2A     | 0.76049757 |
| SPRED1     | 0.96666336 |
| SPRR2D     | 4.943298   |
| SPRY1      | 0.49174142 |
| SPRY2      | 1.2943351  |
| SPSB1      | 0.787411   |
| SPTAN1     | 0.24248743 |
| SPTLC1     | 0.50631046 |
| SPTLC2     | 0.23405647 |
| SPTSSB     | 0.8381705  |
| SRFBP1     | 0.44678307 |
| SRGAP1     | 0.64755774 |
| SRGN       | 0.30866385 |

|            |            |
|------------|------------|
| SRP54A     | 0.43763542 |
| SRPRB      | 0.31659317 |
| SRY        | 1.74722    |
| SS18       | 0.2918725  |
| SSH2       | 0.8149843  |
| SSH3       | 0.6818576  |
| SSPO       | 0.659369   |
| SSU72      | 0.34218788 |
| SSX9       | 0.89581823 |
| SSXB10     | 0.24096584 |
| ST13       | 0.5797415  |
| ST3GAL1    | 0.27092457 |
| ST6GALNAC2 | 1.5119858  |
| ST6GALNAC4 | 0.5764866  |
| STAC       | 0.965642   |
| STAC3      | 1.0220447  |
| STAM2      | 2.5545406  |
| STAMOS     | 1.265522   |
| STAP1      | 0.21173906 |
| STAP2      | 0.9935541  |
| STARD7     | 0.28129578 |
| STAT1      | 1.0214672  |
| STAT2      | 1.2864275  |
| STAT3      | 1.005301   |
| STAT4      | 1.2445035  |
| STAT6      | 0.3228054  |
| STEAP1     | 4.591388   |
| STEAP2     | 2.082585   |
| STEAP4     | 2.4804802  |
| STFA1      | 1.7439575  |
| STFA2      | 1.7673178  |
| STFA2L1    | 1.4761219  |
| STFA3      | 1.7152925  |
| STIP1      | 0.28384018 |
| STK11IP    | 0.34606028 |
| STK17B     | 0.4546485  |
| STK19      | 0.49596977 |
| STK33      | 0.7008946  |
| STK39      | 0.40804386 |
| STK40      | 0.8055997  |
| STMN3      | 0.9330113  |
| STON1      | 1.6817749  |
| STRA6      | 2.072874   |
| STRIP1     | 0.5739198  |
| STRIP2     | 0.7042055  |

|          |            |
|----------|------------|
| STX11    | 0.25074244 |
| STX16    | 0.5435262  |
| STX1B    | 0.46297932 |
| STX6     | 0.2817192  |
| STX7     | 0.23012304 |
| STXBP3A  | 0.46006584 |
| STXBP3B  | 0.77747107 |
| STXBP5L  | 1.06351    |
| STYX     | 0.27498055 |
| SUCO     | 0.4158857  |
| SUGT1    | 0.32975435 |
| SULT2A7  | 0.8477979  |
| SUPT20   | 0.49258876 |
| SURF4    | 0.46232605 |
| SURF6    | 0.8754711  |
| SUSD2    | 0.5637469  |
| SUSD4    | 0.26990175 |
| SUV420H1 | 0.7031636  |
| SWI5     | 0.9236808  |
| SYCE1L   | 1.3817911  |
| SYCE3    | 1.3007665  |
| SYCN     | 9.631811   |
| SYF2     | 0.5357399  |
| SYK      | 1.0386329  |
| SYNJ1    | 0.30799675 |
| SYNJ2BP  | 0.6785202  |
| SYNPO    | 1.3000395  |
| SYPL     | 0.2825203  |
| SYPL2    | 0.443285   |
| SYT1     | 0.26258516 |
| SYT11    | 1.5823212  |
| SYT13    | 1.8378472  |
| SYT8     | 0.99218583 |
| SYTL3    | 0.8264413  |
| SYVN1    | 0.24212933 |
| TAAR7B   | 2.6743498  |
| TADA2B   | 0.7365308  |
| TAF7L    | 0.47745323 |
| TAGAP    | 0.6665182  |
| TAGLN    | 0.55763435 |
| TANK     | 0.25576353 |
| TAOK1    | 0.6679287  |
| TAP1     | 0.5404415  |
| TAP2     | 0.71951675 |
| TAPBP    | 0.37796688 |

|            |            |
|------------|------------|
| TARM1      | 1.7989738  |
| TARS       | 0.4261427  |
| TARS2      | 0.2763443  |
| TAS2R131   | 2.6550784  |
| TAS2R134   | 1.6610272  |
| TAS2R137   | 0.9943998  |
| TAT        | 0.27651596 |
| TBC1D1     | 1.0423021  |
| TBC1D2     | 0.30889225 |
| TBC1D20    | 0.28136253 |
| TBC1D22BOS | 0.8559902  |
| TBC1D23    | 0.5227332  |
| TBC1D30    | 1.1229541  |
| TBC1D9     | 1.5867081  |
| TBCA       | 0.2393856  |
| TBCK       | 0.928087   |
| TBK1       | 0.35324144 |
| TBRG1      | 0.44704008 |
| TBX10      | 0.5083895  |
| TBX15      | 0.86949444 |
| TBX21      | 0.9588051  |
| TBX22      | 1.0832891  |
| TBX3       | 1.4263334  |
| TCAP       | 1.4053705  |
| TCF4       | 0.6383805  |
| TCF7       | 0.88241386 |
| TCFL5      | 0.855016   |
| TCL1B2     | 1.140187   |
| TCOF1      | 0.44317818 |
| TCP10B     | 1.9812121  |
| TCRG-V1    | 0.24881792 |
| TCSTV3     | 0.69667196 |
| TCTE1      | 0.54022527 |
| TDG        | 0.70447063 |
| TDGF1      | 0.6805606  |
| TDRD7      | 1.2943349  |
| TDRP       | 0.5093274  |
| TEAD1      | 0.7447119  |
| TEAD2      | 0.21081066 |
| TEAD4      | 0.67739487 |
| TECPR1     | 0.20403576 |
| TEPP       | 0.5244491  |
| TERC       | 1.9330907  |
| TERF2      | 0.3322959  |
| TES        | 1.1384745  |

|         |            |
|---------|------------|
| TESK1   | 0.619771   |
| TESPA1  | 1.1876063  |
| TET2    | 0.5283699  |
| TEX101  | 0.55795574 |
| TEX11   | 1.2568433  |
| TEX12   | 1.1569533  |
| TEX13   | 0.8219199  |
| TEX19.2 | 1.6425116  |
| TEX36   | 1.2600121  |
| TFAP2D  | 1.5566077  |
| TFB2M   | 0.46085072 |
| TFEC    | 0.36067867 |
| TFF2    | 8.051569   |
| TFG     | 0.2106471  |
| TFPI    | 0.5640087  |
| TGFA    | 0.4734435  |
| TGFBR2  | 0.34888315 |
| TGIF1   | 1.1214094  |
| TGIF2   | 0.77251077 |
| TGM2    | 1.2889247  |
| TGOLN1  | 0.39060497 |
| TGOLN2  | 0.40442467 |
| TGTP1   | 1.280437   |
| TGTP2   | 1.1508946  |
| THA1    | 1.674314   |
| THADA   | 0.3460176  |
| THBS4   | 1.1640158  |
| THEMIS  | 0.55193806 |
| THEMIS3 | 0.89592123 |
| THYN1   | 0.25545168 |
| TIFA    | 1.4428172  |
| TIGIT   | 1.583127   |
| TIMM10  | 0.43017578 |
| TIMM9   | 0.2859664  |
| TIMP1   | 2.8717203  |
| TIMP3   | 0.9975705  |
| TIPARP  | 1.489234   |
| TIRAP   | 0.3677044  |
| TKTL2   | 1.1054447  |
| TLE1    | 0.82197523 |
| TLE3    | 0.5418415  |
| TLR2    | 2.0033488  |
| TLR6    | 1.0655465  |
| TLR7    | 1.0220017  |
| TM2D1   | 0.44204235 |



|            |            |
|------------|------------|
| TM2D3      | 0.36910295 |
| TM4SF4     | 0.5472486  |
| TM6SF2     | 1.2164125  |
| TMA16      | 2.0368323  |
| TMBIM1     | 0.69890594 |
| TMC3       | 1.4841695  |
| TMC5       | 2.098691   |
| TMCO4      | 1.0633183  |
| TMED10     | 0.2202406  |
| TMED11     | 0.70908165 |
| TMED6      | 2.6132224  |
| TMED7      | 0.4896798  |
| TMED8      | 0.41018105 |
| TMED9      | 0.25397015 |
| TMEM102    | 0.5405295  |
| TMEM108    | 0.31049156 |
| TMEM11     | 0.38867807 |
| TMEM121    | 0.43134165 |
| TMEM123    | 0.55040455 |
| TMEM131    | 0.39748716 |
| TMEM132E   | 3.159606   |
| TMEM135    | 0.27333784 |
| TMEM140    | 0.4056549  |
| TMEM158    | 0.34993076 |
| TMEM159    | 0.3523841  |
| TMEM161B   | 0.25725174 |
| TMEM163    | 1.0001183  |
| TMEM167    | 0.18294811 |
| TMEM169    | 1.8621485  |
| TMEM173    | 0.9183345  |
| TMEM181A   | 0.21310711 |
| TMEM181B-f | 1.8327174  |
| TMEM184B   | 0.9914384  |
| TMEM184C   | 0.348382   |
| TMEM185B   | 0.63924646 |
| TMEM192    | 0.21891356 |
| TMEM2      | 1.4428306  |
| TMEM200C   | 1.1285625  |
| TMEM202    | 0.49871135 |
| TMEM230    | 0.31587362 |
| TMEM247    | 0.602669   |
| TMEM252    | 1.5903778  |
| TMEM260    | 0.22040486 |
| TMEM30B    | 0.96116114 |
| TMEM38B    | 0.4305749  |

|           |            |
|-----------|------------|
| TMEM39A   | 0.7134867  |
| TMEM42    | 0.26715088 |
| TMEM50B   | 0.5923643  |
| TMEM63B   | 0.27239037 |
| TMEM63C   | 1.970104   |
| TMEM66    | 0.19529295 |
| TMEM68    | 0.572597   |
| TMEM74BOS | 0.8190317  |
| TMEM87A   | 0.40375805 |
| TMEM87B   | 0.46201468 |
| TMEM89    | 0.7601538  |
| TMEM8C    | 3.6244078  |
| TMF1      | 0.4472227  |
| TMIE      | 0.7063296  |
| TMOD4     | 1.1758323  |
| TMPRSS2   | 1.7750075  |
| TMSB15B1  | 0.5248561  |
| TMUB1     | 0.44324827 |
| TNF       | 4.206231   |
| TNFAIP1   | 0.87605953 |
| TNFAIP2   | 0.75712395 |
| TNFAIP3   | 3.3993626  |
| TNFAIP6   | 2.8871274  |
| TNFAIP8L1 | 0.32443666 |
| TNFAIP8L3 | 1.1385016  |
| TNFRSF10B | 1.2904685  |
| TNFRSF12A | 2.5400085  |
| TNFRSF13C | 0.46550798 |
| TNFRSF18  | 1.2053876  |
| TNFRSF1B  | 0.32127953 |
| TNFRSF22  | 0.32639933 |
| TNFRSF23  | 0.37711906 |
| TNFRSF25  | 1.1673217  |
| TNFRSF4   | 1.586935   |
| TNFRSF9   | 0.23494434 |
| TNFSF10   | 1.0401459  |
| TNFSF11   | 0.4711504  |
| TNFSF14   | 0.30798817 |
| TNFSF15   | 3.2862554  |
| TNFSF8    | 1.4789319  |
| TNFSF9    | 2.413536   |
| TNIP1     | 1.9032893  |
| TNIP2     | 1.1229725  |
| TNIP3     | 3.878213   |
| TNKS2     | 0.30310297 |

|             |            |
|-------------|------------|
| TNN         | 1.4656067  |
| TNP2        | 1.8870356  |
| TNPO3       | 0.85857296 |
| TNRC6A      | 0.20483255 |
| TNS4        | 0.582108   |
| TOMM20L     | 0.7451129  |
| TOMM7       | 0.24097824 |
| TOMM70A     | 0.3337903  |
| TOP1MT      | 0.35088873 |
| TOR1AIP1    | 0.2655387  |
| TOR1AIP2    | 0.5141082  |
| TOR3A       | 1.2259092  |
| TOX2        | 0.9591422  |
| TPD52       | 0.8211584  |
| TPM4        | 0.40240002 |
| TPP2        | 0.26506758 |
| TRA2A       | 0.3935256  |
| TRAF1       | 2.019199   |
| TRAF2       | 0.491055   |
| TRAF3       | 0.47019863 |
| TRAF3IP2    | 0.34356356 |
| TRAF3IP3    | 0.23311234 |
| TRAF6       | 0.3756194  |
| TRAFD1      | 0.6526408  |
| TRAIIP      | 0.27420473 |
| TRAM2       | 0.47190857 |
| TRAPPC3     | 0.47238445 |
| TRAPPC4     | 0.20845842 |
| TRAPPC8     | 0.27173543 |
| TRAT1       | 0.6260636  |
| TRAV14D-3-L | 1.5672114  |
| TRAV3N-3    | 1.5900626  |
| TRCG1       | 0.75939226 |
| TREM1       | 1.6010733  |
| TREM3       | 0.4642043  |
| TREML2      | 0.6526952  |
| TREX1       | 1.1274133  |
| TRIB1       | 1.1934814  |
| TRIM11      | 0.5931568  |
| TRIM12C     | 1.0328708  |
| TRIM13      | 0.35990882 |
| TRIM14      | 0.5160761  |
| TRIM21      | 1.4279552  |
| TRIM25      | 0.37845087 |
| TRIM26      | 0.94758797 |

|           |            |
|-----------|------------|
| TRIM30A   | 1.7075391  |
| TRIM30B   | 1.1178246  |
| TRIM30C   | 2.2765975  |
| TRIM30D   | 1.4879975  |
| TRIM32    | 0.3594694  |
| TRIM34A   | 1.0141044  |
| TRIM34B   | 0.736084   |
| TRIM35    | 0.9267101  |
| TRIM36    | 1.6847191  |
| TRIM38    | 1.0126052  |
| TRIM41    | 0.25213432 |
| TRIM43B   | 0.90643954 |
| TRIM44    | 0.5605154  |
| TRIM47    | 0.637908   |
| TRIM5     | 0.25739026 |
| TRIM50    | 3.066069   |
| TRIM54    | 1.0937827  |
| TRIM56    | 0.72844124 |
| TRIM6     | 0.6284199  |
| TRIM65    | 0.44441342 |
| TRIM68    | 1.2021847  |
| TRIM69    | 1.4408586  |
| TRIP10    | 0.82314205 |
| TRMT1     | 0.53849125 |
| TRMT10A   | 0.25695252 |
| TRMT2A    | 0.2561288  |
| TRMT6     | 0.33665705 |
| TRMT61A   | 0.6831322  |
| TRNP1     | 1.5839815  |
| TRP53I11  | 0.40674257 |
| TRP53INP2 | 0.6737361  |
| TRP53RK   | 0.19562817 |
| TRP63     | 0.51197433 |
| TRPA1     | 0.89750314 |
| TRY4      | 10.361959  |
| TRY5      | 10.187517  |
| TSC22D3   | 1.0847745  |
| TSEN54    | 0.27522564 |
| TSGA13    | 1.9796567  |
| TSKU      | 0.4824462  |
| TSNAXIP1  | 1.1369419  |
| TSPEAR    | 0.83187366 |
| TSR1      | 0.5412717  |
| TSR2      | 0.7601304  |
| TSR3      | 0.36088276 |

|         |            |
|---------|------------|
| TSTD1   | 1.178083   |
| TSTD2   | 0.20539474 |
| TSX     | 1.35396    |
| TTC13   | 0.2493043  |
| TTC14   | 0.2608366  |
| TTC19   | 0.2767477  |
| TTC30A1 | 0.30497313 |
| TTC37   | 0.9531028  |
| TTC39B  | 0.74762034 |
| TTI2    | 0.21714497 |
| TTL     | 0.53932047 |
| TTLL3   | 1.0171871  |
| TTLL4   | 0.3294282  |
| TTLL7   | 0.77294636 |
| TTLL8   | 0.8526764  |
| TTLL9   | 0.38758254 |
| TTPAL   | 0.5739498  |
| TTR     | 1.6956773  |
| TTYH1   | 0.8710282  |
| TUBA1A  | 0.3510356  |
| TUBB6   | 1.5336962  |
| TULP4   | 0.81456375 |
| TWIST2  | 0.66649246 |
| TXK     | 1.327766   |
| TXLNB   | 0.71582294 |
| TXLNG   | 0.4434085  |
| TXN1    | 0.23483467 |
| TXNDC16 | 0.23263264 |
| TXNDC8  | 0.63780046 |
| TXNRD1  | 0.8839083  |
| TXNRD3  | 0.37768698 |
| TYK2    | 0.29271603 |
| TYW5    | 0.78272724 |
| UBA7    | 0.38578796 |
| UBD     | 0.544034   |
| UBE2D3  | 0.22500181 |
| UBE2E1  | 0.35866308 |
| UBE2E2  | 0.48245525 |
| UBE2F   | 0.535275   |
| UBE2J1  | 0.30886936 |
| UBE2Q1  | 0.2629509  |
| UBE2Q2  | 0.28347397 |
| UBE2W   | 0.33849764 |
| UBFD1   | 0.32929134 |
| UBN1    | 0.17523813 |

|          |            |
|----------|------------|
| UBOX5    | 0.4818735  |
| UBQLN1   | 0.86011267 |
| UCHL3    | 1.2355652  |
| UCKL1    | 0.26873922 |
| UCP1     | 1.1210771  |
| UFD1L    | 0.18024874 |
| UFM1     | 0.24461365 |
| UGGT1    | 0.40661716 |
| UGT2A1   | 4.138687   |
| UGT8A    | 0.6098757  |
| UNC45A   | 0.4389305  |
| UNC79    | 1.2352858  |
| UPP1     | 2.61094    |
| URAD     | 1.0207827  |
| URAH     | 1.194932   |
| USH1G    | 0.37141657 |
| USP16    | 0.6317196  |
| USP17LC  | 0.32457328 |
| USP17LE  | 1.7066586  |
| USP18    | 2.787107   |
| USP42    | 0.9329939  |
| USP43    | 0.293113   |
| USPL1    | 0.3556428  |
| UTF1     | 0.5911679  |
| UTP11L   | 0.5935254  |
| UTP14A   | 0.5541792  |
| UTP20    | 0.45359755 |
| UTP6     | 0.45291948 |
| UTRN     | 0.43622208 |
| VAMP5    | 0.22088051 |
| VAPA     | 0.27008915 |
| VASH1    | 1.1927447  |
| VASP     | 0.4667759  |
| VAV1     | 0.8113737  |
| VAX1     | 1.524631   |
| VCPIP1   | 0.35449362 |
| VDR      | 2.1908069  |
| VGf      | 3.262848   |
| VGLL4    | 0.4675088  |
| VLDLR    | 0.58702755 |
| VMN1R13  | 2.1572523  |
| VMN1R151 | 1.1544158  |
| VMN1R167 | 0.82591057 |
| VMN1R197 | 1.7723374  |
| VMN1R212 | 1.3264561  |

|          |            |
|----------|------------|
| VMN1R59  | 1.0552759  |
| VMN1R62  | 0.68275285 |
| VMN1R87  | 1.0792558  |
| VMN2R104 | 1.5557499  |
| VMN2R11  | 2.017654   |
| VMN2R111 | 0.95167184 |
| VMN2R115 | 0.86032987 |
| VMN2R13  | 1.064388   |
| VMN2R3   | 0.3733139  |
| VMN2R52  | 1.30445    |
| VMN2R55  | 1.8674293  |
| VMN2R58  | 0.6821103  |
| VMN2R62  | 1.0682254  |
| VMN2R65  | 1.0769091  |
| VMN2R73  | 1.007586   |
| VMN2R88  | 0.7803569  |
| VMN2R96  | 1.072691   |
| VMN2R97  | 0.8824072  |
| VMP1     | 1.1159692  |
| VNN3     | 4.3201632  |
| VPS16    | 0.19133425 |
| VPS37A   | 0.6456995  |
| VPS4B    | 0.2745328  |
| VPS54    | 0.28662157 |
| VSIG2    | 0.40814018 |
| VSTM2B   | 0.8196373  |
| VTI1B    | 0.73892355 |
| VTN      | 4.2276893  |
| VWA5A    | 0.4111085  |
| VWA5B2   | 0.7853341  |
| WARS     | 0.47028065 |
| WARS2    | 0.5050802  |
| WBP1L    | 0.18827057 |
| WBSCR28  | 0.7300782  |
| WDR1     | 0.93589115 |
| WDR3     | 0.17410612 |
| WDR34    | 0.5257964  |
| WDR38    | 0.5061226  |
| WDR43    | 0.33330488 |
| WDR45B   | 0.6545863  |
| WDR47    | 0.4804926  |
| WDR52    | 0.69373703 |
| WDR59    | 0.55509233 |
| WDR78    | 1.5270755  |
| WDR92    | 1.8885145  |

|         |            |
|---------|------------|
| WFDC15A | 1.3378515  |
| WFDC17  | 2.1764169  |
| WFDC18  | 2.8883815  |
| WFDC5   | 0.90551805 |
| WFDC6A  | 0.9071727  |
| WFDC6B  | 1.2815738  |
| WFS1    | 0.3958521  |
| WHRN    | 1.5914421  |
| WHSC1L1 | 0.35048628 |
| WISP1   | 0.5607705  |
| WNK3    | 1.1892185  |
| WNT1    | 0.5014646  |
| WNT11   | 0.49293876 |
| WNT6    | 0.48694038 |
| WNT9B   | 0.8888123  |
| WSB1    | 0.21068525 |
| WT1OS   | 0.59979105 |
| WWC1    | 0.34693813 |
| XAF1    | 0.41461945 |
| XBP1    | 0.6192384  |
| XCL1    | 0.30977297 |
| XIAP    | 0.26028538 |
| XKR8    | 1.4182844  |
| XLR3B   | 0.80622005 |
| XLR4A   | 0.6611085  |
| XLR4B   | 0.69215107 |
| XLR5B   | 0.8187103  |
| XNTRPC  | 0.40538502 |
| XRN2    | 0.18547344 |
| YAE1D1  | 0.5478873  |
| YAP1    | 0.41791344 |
| YJEFN3  | 0.35608172 |
| YRDC    | 0.3842969  |
| YTHDC1  | 0.6016803  |
| YTHDF2  | 0.24483109 |
| YY1     | 0.36429453 |
| ZAN     | 2.0030196  |
| ZAP70   | 0.7234001  |
| ZBED5   | 0.60496545 |
| ZBED6   | 0.37788653 |
| ZBP1    | 1.4276052  |
| ZBTB12  | 1.1144972  |
| ZBTB16  | 1.422267   |
| ZBTB20  | 0.5689573  |
| ZBTB21  | 0.7836549  |



|         |            |
|---------|------------|
| ZBTB26  | 0.8732896  |
| ZBTB37  | 0.6252749  |
| ZBTB40  | 0.57568884 |
| ZBTB43  | 0.3029704  |
| ZBTB5   | 0.5247016  |
| ZBTB9   | 0.6805639  |
| ZC3H12A | 1.9121361  |
| ZC3H12C | 0.7365694  |
| ZC3H13  | 0.21978092 |
| ZC3H3   | 0.24971771 |
| ZC3H7A  | 0.32303333 |
| ZC3HAV1 | 0.6540966  |
| ZCCHC11 | 0.7710252  |
| ZCCHC12 | 1.0620618  |
| ZCCHC18 | 1.3469305  |
| ZCCHC2  | 1.2739921  |
| ZCCHC7  | 0.4431777  |
| ZCWPW2  | 0.9447694  |
| ZDBF2   | 0.88102365 |
| ZDHHC18 | 0.7582636  |
| ZDHHC23 | 0.33907962 |
| ZFAND5  | 0.2290926  |
| ZFP1    | 1.4217095  |
| ZFP105  | 0.31442785 |
| ZFP112  | 1.3740983  |
| ZFP12   | 0.5113859  |
| ZFP131  | 0.54218817 |
| ZFP169  | 0.4919572  |
| ZFP182  | 0.35578632 |
| ZFP189  | 0.26617146 |
| ZFP202  | 0.61974216 |
| ZFP239  | 0.2590711  |
| ZFP26   | 0.3358884  |
| ZFP260  | 0.6997423  |
| ZFP263  | 1.0970826  |
| ZFP27   | 0.26538777 |
| ZFP275  | 0.40344763 |
| ZFP276  | 0.23610497 |
| ZFP281  | 1.0765023  |
| ZFP287  | 0.4222381  |
| ZFP292  | 0.691463   |
| ZFP318  | 0.46444368 |
| ZFP329  | 0.25355244 |
| ZFP36   | 1.6848254  |
| ZFP365  | 1.1179717  |

|         |            |
|---------|------------|
| ZFP366  | 2.087771   |
| ZFP36L1 | 0.6536398  |
| ZFP36L2 | 0.85631084 |
| ZFP36L3 | 0.8617685  |
| ZFP386  | 0.4621253  |
| ZFP397  | 0.56007385 |
| ZFP420  | 0.71415305 |
| ZFP426  | 0.23604822 |
| ZFP428  | 0.3117833  |
| ZFP429  | 0.9864707  |
| ZFP446  | 0.66986084 |
| ZFP456  | 0.85452485 |
| ZFP458  | 0.8504536  |
| ZFP46   | 0.65932655 |
| ZFP462  | 0.47106886 |
| ZFP51   | 0.40861416 |
| ZFP513  | 0.6150656  |
| ZFP516  | 0.72469544 |
| ZFP52   | 1.023344   |
| ZFP523  | 0.2679472  |
| ZFP53   | 2.0738049  |
| ZFP560  | 0.30468678 |
| ZFP566  | 0.37120247 |
| ZFP568  | 0.2542138  |
| ZFP58   | 0.23476577 |
| ZFP583  | 0.6102762  |
| ZFP593  | 0.93474245 |
| ZFP595  | 0.23188639 |
| ZFP597  | 0.5306432  |
| ZFP605  | 0.45581818 |
| ZFP606  | 0.4960382  |
| ZFP607  | 0.43612528 |
| ZFP612  | 0.7245004  |
| ZFP62   | 0.5013609  |
| ZFP622  | 0.29759026 |
| ZFP64   | 0.33572388 |
| ZFP65   | 0.26010585 |
| ZFP655  | 0.26272058 |
| ZFP658  | 0.5803385  |
| ZFP661  | 0.46748543 |
| ZFP663  | 0.4266534  |
| ZFP691  | 0.806685   |
| ZFP697  | 1.7704821  |
| ZFP7    | 0.18964052 |
| ZFP719  | 0.3213396  |

|         |            |
|---------|------------|
| ZFP740  | 0.45243788 |
| ZFP747  | 0.5388527  |
| ZFP748  | 0.57112765 |
| ZFP777  | 0.3071642  |
| ZFP783  | 1.039084   |
| ZFP784  | 0.39028597 |
| ZFP790  | 1.2763739  |
| ZFP809  | 0.49682808 |
| ZFP811  | 3.5352287  |
| ZFP82   | 0.53624296 |
| ZFP831  | 0.21790957 |
| ZFP839  | 0.99315476 |
| ZFP84   | 0.468637   |
| ZFP850  | 0.41566825 |
| ZFP868  | 0.6180725  |
| ZFP874A | 0.3013482  |
| ZFP882  | 0.20945191 |
| ZFP92   | 0.3191731  |
| ZFP933  | 0.3906815  |
| ZFP935  | 0.33854342 |
| ZFP937  | 0.54798484 |
| ZFP94   | 0.63321304 |
| ZFP943  | 0.38233662 |
| ZFP946  | 0.42851305 |
| ZFP955B | 0.30514145 |
| ZFP958  | 0.7947781  |
| ZG16    | 5.9115214  |
| ZHX2    | 1.33459    |
| ZKSCAN2 | 0.95640755 |
| ZKSCAN7 | 0.45607376 |
| ZKSCAN8 | 0.36387444 |
| ZMAT1   | 0.31842566 |
| ZMIZ1   | 0.38500452 |
| ZMYND11 | 0.45750284 |
| ZMYND15 | 0.68609333 |
| ZNFX1   | 0.84312344 |
| ZNHIT6  | 0.54824305 |
| ZNRF1   | 0.8381939  |
| ZPBP    | 0.32259417 |
| ZPBP2   | 0.43201494 |
| ZPLD1   | 0.95263886 |
| ZRANB2  | 0.39614582 |
| ZSCAN18 | 1.3500628  |
| ZSCAN22 | 0.41968703 |
| ZSCAN4C | 0.7210624  |

|        |            |
|--------|------------|
| ZSWIM2 | 1.0316076  |
| ZSWIM6 | 0.3272624  |
| ZSWIM8 | 0.50638866 |
| ZUFSP  | 1.3418746  |
| ZXDA   | 1.3240619  |
| ZXDB   | 0.6508689  |
| ZXDC   | 0.4920361  |
| ZYG11B | 0.83986616 |
| ZZZ3   | 0.25240564 |

**Mice\_late\_spleen\_DEgenes\_fc****Gene**            **log2 Fold Change**

|         |            |
|---------|------------|
| AAMDC   | -0.959487  |
| AATK    | -1.1795335 |
| ABCA13  | -0.8663774 |
| ABCA3   | -0.4408875 |
| ABCA7   | -0.7676163 |
| ABCA8A  | -2.3726096 |
| ABCA9   | -4.3069563 |
| ABCB10  | -2.5878873 |
| ABCB4   | -1.947712  |
| ABCB6   | -2.5275412 |
| ABCB7   | -0.8958309 |
| ABCB9   | -1.0254898 |
| ABCC3   | -1.265307  |
| ABCG2   | -1.668158  |
| ABCG3   | -2.1026359 |
| ABCG4   | -3.339304  |
| ABHD1   | -0.6020663 |
| ABHD12  | -0.3948851 |
| ABHD14B | -1.2474966 |
| ABHD16A | -0.7127037 |
| ABHD17A | -0.9170342 |
| ABHD4   | -0.4889941 |
| ABHD5   | -0.3517737 |
| ABHD8   | -0.4246254 |
| ABI3    | -0.3876023 |
| ABTB1   | -1.2796688 |
| ACAA2   | -0.851471  |
| ACAD11  | -0.3437514 |
| ACADL   | -0.3299804 |
| ACAP1   | -0.8225737 |
| ACAP3   | -1.0450544 |
| ACAT1   | -0.362958  |
| ACAT2   | -0.3674634 |
| ACAT3   | -0.4123292 |
| ACBD4   | -0.8428474 |
| ACBD6   | -1.1151862 |
| ACD     | -0.7990685 |
| ACE     | -1.5344667 |
| ACHE    | -2.3286572 |
| ACKR1   | -3.014629  |
| ACKR2   | -0.711751  |
| ACKR4   | -3.063198  |
| ACMSD   | -4.1245155 |

|          |            |
|----------|------------|
| ACOT11   | -0.7048488 |
| ACOT13   | -0.7776275 |
| ACOT6    | -0.871203  |
| ACOT8    | -0.4750714 |
| ACP1     | -1.2716031 |
| ACRBP    | -0.5910473 |
| ACSL1    | -0.5392094 |
| ACSL6    | -1.5493672 |
| ACSS1    | -1.2413802 |
| ACSS2    | -1.2927206 |
| ACTA2    | -0.6357961 |
| ACTL11   | -1.1834106 |
| ACTL6A   | -0.7002654 |
| ACTR3B   | -0.6527035 |
| ACVRL1   | -1.4718704 |
| ACYP1    | -0.7237701 |
| ADAM10   | -0.9380894 |
| ADAM22   | -1.4904299 |
| ADAM26A  | -0.569732  |
| ADAM26B  | -2.6157777 |
| ADAM33   | -1.0842116 |
| ADAM6B   | -0.7263827 |
| ADAMDEC1 | -0.4440551 |
| ADAMTS13 | -0.9327958 |
| ADAMTS16 | -1.4392741 |
| ADAMTSL1 | -1.1385496 |
| ADAMTSL5 | -0.8226295 |
| ADCK3    | -0.7250359 |
| ADCY1    | -4.050106  |
| ADCY5    | -1.3072209 |
| ADCY6    | -0.9594426 |
| ADCY7    | -0.5918665 |
| ADD1     | -1.2843075 |
| ADD2     | -3.3903766 |
| ADD3     | -0.8025408 |
| ADH1     | -1.1320901 |
| ADIG     | -1.1747761 |
| ADIPOQ   | -3.91424   |
| ADIPOR1  | -0.5832    |
| ADPGK    | -0.6837025 |
| ADRB1    | -0.7982235 |
| ADRBK1   | -0.5366082 |
| ADSSL1   | -0.9068437 |
| AFMID    | -1.2775822 |
| AGAP1    | -0.6919642 |

|          |            |
|----------|------------|
| AGAP2    | -0.5733433 |
| AGBL1    | -2.6472647 |
| AGBL3    | -0.9723332 |
| AGFG2    | -1.71189   |
| AGMAT    | -1.4057283 |
| AGMO     | -2.479797  |
| AGO1     | -0.5702064 |
| AGO2     | -1.3524461 |
| AGPAT4   | -0.8288093 |
| AGTPBP1  | -0.6307247 |
| AHCTF1   | -0.4136424 |
| AHDC1    | -1.1023777 |
| AHI1     | -0.8110199 |
| AHNAK2   | -1.1605628 |
| AHRR     | -1.1052563 |
| AHSP     | -2.6498618 |
| AIF1     | -1.0855689 |
| AIF1L    | -0.5498357 |
| AJUBA    | -0.9150784 |
| AK1      | -1.1111374 |
| AK3      | -0.8718395 |
| AK8      | -2.6419537 |
| AKAP17B  | -0.8554101 |
| AKAP5    | -1.4249341 |
| AKAP7    | -0.9642477 |
| AKAP8L   | -0.7778282 |
| AKIP1    | -1.3414173 |
| AKR1B10  | -0.9975729 |
| AKR1B7   | -1.8801217 |
| AKR1C6   | -2.5816336 |
| AKR7A5   | -0.8072953 |
| AL118220 | -0.5980034 |
| ALAD     | -3.2587461 |
| ALAS2    | -1.1776681 |
| ALDH18A1 | -0.4108987 |
| ALDH1A1  | -1.5851316 |
| ALDH1A7  | -3.4934924 |
| ALDH2    | -0.5776038 |
| ALDH3B2  | -2.7959552 |
| ALDH4A1  | -0.8117223 |
| ALDOC    | -1.3074279 |
| ALG13    | -0.3150144 |
| ALG2     | -0.3766894 |
| ALKBH7   | -0.6723485 |
| ALKBH8   | -1.0469594 |

|          |            |
|----------|------------|
| ALMS1    | -1.1620741 |
| ALOX12   | -1.2448087 |
| ALOX12E  | -1.3992743 |
| ALOX15   | -2.2552054 |
| ALOX5    | -1.4655704 |
| ALOX5AP  | -0.6313667 |
| ALS2CR12 | -1.3175373 |
| ALYREF   | -0.7521129 |
| AMD2     | -0.635922  |
| AMMECR1  | -1.3506641 |
| AMPD3    | -1.5309591 |
| AMZ1     | -1.507544  |
| AMZ2     | -0.4351339 |
| ANAPC13  | -0.4870815 |
| ANAPC15  | -0.4019294 |
| ANAPC5   | -0.8522277 |
| ANGPTL2  | -2.1024473 |
| ANGPTL6  | -0.4810224 |
| ANGPTL7  | -3.0931919 |
| ANK      | -1.8283486 |
| ANK1     | -2.4412398 |
| ANK3     | -1.1731873 |
| ANKEF1   | -0.6674271 |
| ANKLE1   | -3.1750202 |
| ANKMY2   | -0.6058683 |
| ANKRD13D | -0.6382031 |
| ANKRD2   | -1.5566647 |
| ANKRD22  | -0.5567668 |
| ANKRD26  | -0.5196369 |
| ANKRD35  | -1.4755766 |
| ANKRD50  | -0.4386146 |
| ANKRD54  | -1.3447027 |
| ANKRD9   | -1.6104369 |
| ANKS1B   | -0.5188181 |
| ANLN     | -1.5578742 |
| ANO1     | -1.1765273 |
| ANO10    | -0.302012  |
| ANXA9    | -0.5629473 |
| AOC1     | -1.9579473 |
| AOX1     | -0.80532   |
| AP1B1    | -0.7967153 |
| AP2A1    | -1.2589474 |
| AP2A2    | -1.0991306 |
| AP4M1    | -1.033819  |
| AP5M1    | -0.3749919 |



|           |            |
|-----------|------------|
| APBA1     | -0.6877852 |
| APBB1     | -0.7166758 |
| APBB1IP   | -0.4336114 |
| APC2      | -0.8587596 |
| APCDD1    | -0.9737067 |
| APEH      | -1.5092063 |
| APH1B     | -0.697926  |
| APIP      | -0.506825  |
| APLF      | -1.427372  |
| APLNR     | -3.3729587 |
| APLP2     | -0.4392824 |
| APOA1BP   | -0.6054626 |
| APOA4     | -1.5919178 |
| APOBR     | -0.6729093 |
| APOC1     | -0.7810936 |
| APOF      | -0.9177113 |
| APOL10A   | -3.6933565 |
| APOL10B   | -1.1331067 |
| APOL11B   | -2.2986403 |
| APOL7B    | -0.6804676 |
| APOL8     | -2.4173145 |
| APOO      | -0.5241971 |
| AQP1      | -2.4059849 |
| AQP11     | -1.4012835 |
| AQP2      | -2.1740236 |
| AQP9      | -1.5917933 |
| ARF5      | -1.0785398 |
| ARG1      | -0.7696688 |
| ARHGAP18  | -1.552094  |
| ARHGAP19  | -1.549079  |
| ARHGAP23  | -1.307756  |
| ARHGAP33  | -2.4959319 |
| ARHGAP39  | -1.2568922 |
| ARHGAP4   | -1.3420668 |
| ARHGAP6   | -0.8613582 |
| ARHGAP9   | -0.6145301 |
| ARHGDIB   | -0.3769755 |
| ARHGEF1   | -0.6241536 |
| ARHGEF10L | -0.4574781 |
| ARHGEF39  | -2.0073638 |
| ARHGEF4   | -0.9331684 |
| ARHGEF40  | -1.3254485 |
| ARHGEF9   | -1.1717517 |
| ARID4A    | -0.6078811 |
| ARL11     | -1.6852555 |

|         |            |
|---------|------------|
| ARL4A   | -1.0086207 |
| ARL4D   | -0.5971565 |
| ARL6IP1 | -0.6207876 |
| ARMC1   | -0.4189134 |
| ARMC2   | -1.1543798 |
| ARMC4   | -0.6325345 |
| ARMC6   | -0.570189  |
| ARMC7   | -0.5415525 |
| ARMC9   | -1.821157  |
| ARPC1A  | -0.4249587 |
| ARRB1   | -1.7636971 |
| ARRDC2  | -1.374682  |
| ARSB    | -1.1903028 |
| ARSI    | -1.2135613 |
| ARSK    | -1.0571094 |
| ART2B   | -1.5565264 |
| ART3    | -0.8884149 |
| ART4    | -1.9708009 |
| ARTN    | -2.7042713 |
| ARVCF   | -1.6930308 |
| AS3MT   | -0.7690818 |
| ASAP1   | -1.2689681 |
| ASB1    | -1.6693254 |
| ASB16   | -0.9992621 |
| ASB17   | -3.5936913 |
| ASB2    | -1.055028  |
| ASB6    | -0.5435877 |
| ASCC1   | -0.6632149 |
| ASF1A   | -0.9304767 |
| ASF1B   | -1.971931  |
| ASGR2   | -1.2586367 |
| ASIC1   | -1.4928801 |
| ASNSD1  | -0.3549328 |
| ASPA    | -1.2489364 |
| ASPH    | -0.8835907 |
| ASPM    | -1.811408  |
| ATAD2   | -1.5962567 |
| ATAD5   | -1.348145  |
| ATG2A   | -0.3750453 |
| ATG4B   | -1.2023563 |
| ATG4D   | -1.7593555 |
| ATG9A   | -0.3097076 |
| ATHL1   | -0.8144414 |
| ATL1    | -0.9993527 |
| ATL2    | -0.7180891 |

|          |            |
|----------|------------|
| ATOH8    | -1.0916345 |
| ATP1A2   | -1.9444509 |
| ATP1A3   | -1.0003247 |
| ATP1B2   | -3.8505154 |
| ATP2A3   | -1.3030357 |
| ATP2B2   | -0.7616863 |
| ATP2B4   | -1.4246869 |
| ATP5D    | -0.4083695 |
| ATP6V0A1 | -1.4855585 |
| ATP6V0A4 | -2.3057463 |
| ATP6V0D2 | -1.5575156 |
| ATP6V0E2 | -0.408247  |
| ATP6V1D  | -0.4650245 |
| ATP8A1   | -0.4270749 |
| ATPAF2   | -0.4736924 |
| ATPIF1   | -1.4236546 |
| ATXN1    | -0.4937751 |
| AUP1     | -0.4302836 |
| AURKA    | -1.7451205 |
| B3GALNT2 | -0.6719236 |
| B3GAT3   | -0.5607429 |
| B3GNT5   | -0.6388564 |
| B3GNT8   | -2.502049  |
| B4GALNT1 | -0.4977636 |
| B4GALNT2 | -0.7626896 |
| B4GALT4  | -1.0678527 |
| B9D1     | -0.4440217 |
| BAD      | -0.4769177 |
| BAG1     | -0.5360012 |
| BAG2     | -1.9198682 |
| BAG6     | -0.4756889 |
| BAI2     | -1.8095942 |
| BANK1    | -0.8344588 |
| BARD1    | -1.3167272 |
| BAZ1B    | -0.5636973 |
| BBIP1    | -0.3242464 |
| BBS1     | -0.9628537 |
| BBS10    | -0.5898237 |
| BBS7     | -0.6195242 |
| BBS9     | -1.1850753 |
| BCAM     | -1.1421509 |
| BCAS3    | -0.6507173 |
| BCKDK    | -0.8888578 |
| BCL2L1   | -0.5729384 |
| BCL2L13  | -1.04531   |

|         |            |
|---------|------------|
| BCL7A   | -0.7547171 |
| BCL7B   | -0.8175755 |
| BCO2    | -0.758781  |
| BCOR    | -0.4418726 |
| BCORL1  | -1.639972  |
| BECN1   | -0.6146388 |
| BEND5   | -0.7406316 |
| BEND7   | -0.5163622 |
| BEX4    | -2.3694844 |
| BEX6    | -2.451618  |
| BFSP2   | -1.2241783 |
| BGLAP   | -0.7489452 |
| BGLAP2  | -0.8112657 |
| BIN1    | -0.3144984 |
| BIN2    | -0.5339055 |
| BIRC5   | -2.0112796 |
| BLK     | -0.6560526 |
| BLM     | -1.9113641 |
| BLOC1S1 | -0.453825  |
| BLOC1S5 | -1.1655097 |
| BLVRA   | -0.989892  |
| BLVRB   | -2.0573177 |
| BMP4    | -1.1828175 |
| BMP6    | -0.6490398 |
| BMX     | -1.0520179 |
| BMYC    | -0.3377461 |
| BNC1    | -1.3554425 |
| BNC2    | -1.1690714 |
| BNIP3L  | -0.818234  |
| BOK     | -0.7572575 |
| BOLA1   | -1.2475688 |
| BOLA3   | -1.1245971 |
| BORA    | -0.9116743 |
| BPGM    | -0.4510827 |
| BPHL    | -1.1565509 |
| BPIFA6  | -0.491178  |
| BRCA1   | -1.7640951 |
| BRCA2   | -2.0170002 |
| BRD3    | -0.4716711 |
| BRDT    | -0.8983483 |
| BRF2    | -0.4306202 |
| BRIP1   | -0.7088096 |
| BRPF3   | -1.538876  |
| BSCL2   | -0.7222924 |
| BSDC1   | -0.7032266 |

|          |            |
|----------|------------|
| BSG      | -1.3363853 |
| BTBD2    | -1.0354137 |
| BTBD6    | -0.6761622 |
| BTD      | -0.6273212 |
| BTG2     | -0.9493375 |
| BTNL1    | -0.5974162 |
| BTNL10   | -1.708117  |
| BTNL2    | -0.797976  |
| BTRC     | -1.1329076 |
| BUB1     | -1.629427  |
| BUB1B    | -2.1401505 |
| BUB3     | -0.5960774 |
| BVES     | -1.0893896 |
| BZRAP1   | -0.867347  |
| C1GALT1  | -0.5518994 |
| C1QTNF2  | -2.4395106 |
| C1QTNF4  | -1.1880527 |
| C1QTNF5  | -1.1774447 |
| C1QTNF7  | -1.3950038 |
| C2CD2    | -0.430649  |
| C2CD2L   | -0.8409076 |
| C2CD3    | -0.7990015 |
| C2CD5    | -0.7861886 |
| C3AR1    | -0.7847474 |
| C5AR2    | -1.4544737 |
| C6       | -1.434247  |
| C8G      | -0.8840294 |
| CAAP1    | -0.3916211 |
| CAB39L   | -0.3696399 |
| CABIN1   | -0.8363895 |
| CACHD1   | -2.0102046 |
| CACNA1G  | -4.4357405 |
| CACNA1I  | -1.6834376 |
| CACNA2D2 | -0.5381486 |
| CACNB1   | -0.3208134 |
| CACNG1   | -0.6324673 |
| CACTIN   | -0.9695172 |
| CADM1    | -1.2953472 |
| CADM4    | -0.7037015 |
| CALHM2   | -0.5195227 |
| CALM2    | -0.5219808 |
| CALM3    | -0.5590105 |
| CALML4   | -1.4474881 |
| CALR4    | -1.5471649 |
| CAMK1    | -0.8468106 |

|         |            |
|---------|------------|
| CAMK1D  | -0.6773586 |
| CAMK1G  | -1.0537066 |
| CAMKK2  | -0.4968081 |
| CAMP    | -2.7459354 |
| CAMSAP2 | -1.1791229 |
| CAND2   | -0.3744402 |
| CAP2    | -1.5975785 |
| CAPN1   | -0.8578286 |
| CAPN10  | -0.5520587 |
| CAPN3   | -2.4247804 |
| CAPN5   | -1.101079  |
| CAPRIN2 | -1.0813613 |
| CAPSL   | -0.7171044 |
| CAR1    | -2.0301914 |
| CAR2    | -2.0830703 |
| CAR3    | -3.888627  |
| CAR6    | -0.7027354 |
| CAR7    | -0.9266586 |
| CARD11  | -0.7070675 |
| CARD9   | -1.465862  |
| CARHSP1 | -1.418055  |
| CARM1   | -0.4680657 |
| CARS2   | -0.6454516 |
| CASC5   | -1.880286  |
| CASP14  | -0.8735638 |
| CASP3   | -0.5348868 |
| CASP6   | -0.7494168 |
| CASP9   | -0.7539864 |
| CASQ2   | -2.2483711 |
| CASS4   | -0.659615  |
| CAT     | -1.1805663 |
| CAV1    | -1.822046  |
| CAV2    | -1.0291464 |
| CBFA2T3 | -1.5682392 |
| CBR1    | -0.8220067 |
| CBR2    | -2.120467  |
| CBX2    | -0.8249652 |
| CBX3    | -0.7080054 |
| CBX5    | -1.3150563 |
| CBX6    | -1.1101966 |
| CBY1    | -1.6389828 |
| CCDC103 | -2.3983572 |
| CCDC112 | -0.3274484 |
| CCDC113 | -0.7544808 |
| CCDC125 | -0.5188592 |

|          |            |
|----------|------------|
| CCDC136  | -0.9009614 |
| CCDC144B | -0.3949642 |
| CCDC150  | -1.5381284 |
| CCDC157  | -0.6447148 |
| CCDC167  | -1.0982897 |
| CCDC18   | -1.7032158 |
| CCDC181  | -0.4510102 |
| CCDC185  | -0.5250664 |
| CCDC24   | -1.5457487 |
| CCDC28B  | -0.6869941 |
| CCDC34   | -1.781831  |
| CCDC42B  | -1.5147574 |
| CCDC51   | -0.6423292 |
| CCDC57   | -0.4530656 |
| CCDC61   | -1.1360321 |
| CCDC67   | -0.631496  |
| CCDC68   | -1.0235615 |
| CCDC69   | -0.5785992 |
| CCDC77   | -1.1202278 |
| CCDC80   | -3.4598186 |
| CCDC88A  | -0.5974293 |
| CCDC88C  | -0.3955803 |
| CCDC92   | -1.1101599 |
| CCDC97   | -0.3708854 |
| CCHCR1   | -1.678637  |
| CCL24    | -3.1804965 |
| CCL26    | -0.7031794 |
| CCL27A   | -0.4242122 |
| CCL6     | -0.9950681 |
| CCNA2    | -2.4742827 |
| CCNB1    | -2.176187  |
| CCNB2    | -2.14392   |
| CCND1    | -0.9427037 |
| CCND3    | -1.5996122 |
| CCNDBP1  | -0.6558695 |
| CCNE1    | -2.7541738 |
| CCNF     | -2.065538  |
| CCP110   | -1.7053437 |
| CCPG1    | -0.3400326 |
| CCR2     | -2.0625615 |
| CCR3     | -3.5069168 |
| CCR6     | -0.8312182 |
| CCRN4L   | -0.5129795 |
| CCS      | -0.6884046 |
| CCSAP    | -0.5801241 |

|          |            |
|----------|------------|
| CD101    | -1.0391014 |
| CD160    | -2.4390664 |
| CD163    | -2.694939  |
| CD180    | -1.2222908 |
| CD200R4  | -3.4605894 |
| CD207    | -3.0534375 |
| CD209A   | -3.9071379 |
| CD209B   | -1.534641  |
| CD209D   | -0.5878866 |
| CD209F   | -2.4194372 |
| CD209G   | -0.9156172 |
| CD226    | -1.0107713 |
| CD248    | -1.8558855 |
| CD24A    | -1.9117718 |
| CD300C   | -1.3457396 |
| CD300LB  | -2.620972  |
| CD300LD  | -1.7587588 |
| CD300LH  | -0.718744  |
| CD37     | -0.8944516 |
| CD3G     | -0.4186215 |
| CD47     | -0.5530958 |
| CD52     | -0.6983523 |
| CD59A    | -1.0823383 |
| CD5L     | -0.5516295 |
| CD7      | -1.8102965 |
| CD74     | -0.4607554 |
| CD79A    | -1.0810156 |
| CD79B    | -1.109056  |
| CD82     | -0.7064581 |
| CD84     | -0.4092126 |
| CD99L2   | -1.7168188 |
| CDADC1   | -0.5905109 |
| CDAN1    | -1.4109707 |
| CDC123   | -0.5244012 |
| CDC14A   | -0.6817534 |
| CDC20    | -1.4904046 |
| CDC25B   | -2.2821827 |
| CDC25C   | -1.7124643 |
| CDC27    | -0.6197453 |
| CDC42BPA | -0.8014739 |
| CDC42EP3 | -1.394949  |
| CDC42SE1 | -0.3259292 |
| CDC45    | -1.2626891 |
| CDC6     | -2.805429  |
| CDC7     | -0.4133117 |



|            |            |
|------------|------------|
| CDCA2      | -2.2405798 |
| CDCA3      | -1.4232545 |
| CDCA4      | -0.9850912 |
| CDCA5      | -1.3245373 |
| CDCA8      | -1.734972  |
| CDH18      | -0.9338045 |
| CDK1       | -1.252805  |
| CDK15      | -1.0215299 |
| CDK16      | -0.4672175 |
| CDK19      | -0.7840543 |
| CDK2       | -0.9675107 |
| CDK4       | -0.3636069 |
| CDK5RAP2   | -1.4241009 |
| CDKL1      | -0.9916158 |
| CDKN1C     | -0.6652508 |
| CDKN2AIPNL | -0.3897238 |
| CDKN2C     | -3.3517969 |
| CDKN2D     | -1.0221882 |
| CDKN3      | -2.830885  |
| CDNF       | -0.5529914 |
| CDPF1      | -0.6809158 |
| CDR2       | -1.9423146 |
| CDT1       | -0.8410969 |
| CDYL       | -0.4084797 |
| CEACAM10   | -0.873945  |
| CEACAM2    | -0.9034343 |
| CEACAM20   | -0.8450832 |
| CEBPE      | -1.7820606 |
| CECR2      | -1.7909546 |
| CECR5      | -1.1018941 |
| CENPA      | -1.9456196 |
| CENPC1     | -0.880424  |
| CENPE      | -1.5027623 |
| CENPF      | -1.9182026 |
| CENPH      | -2.07906   |
| CENPI      | -1.492379  |
| CENPJ      | -0.5964661 |
| CENPK      | -1.9133902 |
| CENPL      | -1.627305  |
| CENPM      | -0.5980597 |
| CENPN      | -1.5352554 |
| CENPO      | -0.5748839 |
| CENPP      | -2.0608168 |
| CENPQ      | -0.5535612 |
| CENPT      | -1.0363593 |

|           |            |
|-----------|------------|
| CENPU     | -0.9588988 |
| CENPV     | -0.7116466 |
| CENPW     | -1.000504  |
| CEP104    | -0.7914901 |
| CEP112OS2 | -0.6145973 |
| CEP128    | -1.3404732 |
| CEP131    | -1.4946003 |
| CEP152    | -0.9644589 |
| CEP164    | -0.8124242 |
| CEP192    | -0.5099111 |
| CEP250    | -1.0935493 |
| CEP290    | -1.5397582 |
| CEP41     | -0.8717439 |
| CEP44     | -0.8516154 |
| CEP57     | -1.3059812 |
| CEP57L1   | -0.8090017 |
| CEP70     | -1.6921115 |
| CEP72     | -1.8537025 |
| CEP76     | -2.4255025 |
| CEP78     | -0.7128866 |
| CEP85     | -0.7345221 |
| CEP89     | -1.4003382 |
| CERCAM    | -2.488683  |
| CERKL     | -0.9053857 |
| CES1D     | -2.404948  |
| CES2G     | -2.7909498 |
| CFD       | -0.9784207 |
| CGN       | -2.158708  |
| CGRRF1    | -0.5189867 |
| CHAC2     | -1.293951  |
| CHAF1A    | -1.4475245 |
| CHAF1B    | -1.8389754 |
| CHAT      | -0.6475167 |
| CHCHD10   | -0.7962265 |
| CHD1      | -0.4490359 |
| CHD8      | -0.5942178 |
| CHEK2     | -1.6254606 |
| CHIL3     | -0.6862402 |
| CHIL4     | -1.4049714 |
| CHIT1     | -4.5058765 |
| CHN2      | -0.9063842 |
| CHP2      | -1.9655905 |
| CHRD1     | -0.6486917 |
| CHRM4     | -1.511317  |
| CHST1     | -1.7633886 |

|         |            |
|---------|------------|
| CHST12  | -0.6170566 |
| CHST3   | -1.630722  |
| CHST8   | -1.1814289 |
| CHTF18  | -1.6046405 |
| CIAPIN1 | -0.3879466 |
| CIB1    | -0.4873023 |
| CIB2    | -0.4140892 |
| CIB3    | -0.5975988 |
| CIDEA   | -1.9218483 |
| CIDEC   | -1.7109458 |
| CIITA   | -3.575666  |
| CILP    | -1.9306936 |
| CILP2   | -1.70892   |
| CIT     | -2.778648  |
| CITED1  | -0.8226306 |
| CITED4  | -3.2972722 |
| CKAP2   | -1.5688243 |
| CKAP2L  | -1.5867503 |
| CKAP5   | -0.7561903 |
| CKB     | -1.7684267 |
| CKM     | -2.19226   |
| CKS1B   | -0.6774654 |
| CKS2    | -1.4664044 |
| CLCN2   | -3.2948103 |
| CLCN3   | -0.7927866 |
| CLDN13  | -3.4947448 |
| CLDN15  | -2.144056  |
| CLDN19  | -0.4934499 |
| CLDN20  | -2.6543493 |
| CLEC11A | -1.0565178 |
| CLEC14A | -2.1063383 |
| CLEC1A  | -1.0436654 |
| CLEC1B  | -1.2805777 |
| CLEC2L  | -1.9574275 |
| CLEC3B  | -1.0611501 |
| CLEC4A4 | -2.0488963 |
| CLEC4B2 | -2.2062545 |
| CLEC4G  | -2.4134154 |
| CLEC7A  | -1.8510447 |
| CLEC9A  | -2.404333  |
| CLHC1   | -1.3728795 |
| CLIC5   | -1.4143581 |
| CLK3    | -0.669435  |
| CLMN    | -1.2149904 |
| CLN6    | -1.2506528 |

|         |            |
|---------|------------|
| CLN8    | -1.1546326 |
| CLP1    | -0.7956028 |
| CLPB    | -0.4478536 |
| CLSPN   | -2.2154348 |
| CLSTN3  | -1.2608206 |
| CLTC    | -0.4714661 |
| CLYBL   | -1.8307002 |
| CMAH    | -0.5620518 |
| CMAS    | -1.1365638 |
| CMBL    | -3.8730032 |
| CMC2    | -1.0656133 |
| CML5    | -1.7389851 |
| CMTM5   | -0.6223712 |
| CMTM7   | -0.6935945 |
| CMTM8   | -0.9103539 |
| CNN1    | -2.9569845 |
| CNN2    | -0.533102  |
| CNNM1   | -2.9759965 |
| CNNM2   | -1.9189515 |
| CNOT10  | -0.5431294 |
| CNOT4   | -0.4832521 |
| CNP     | -0.432343  |
| CNPY4   | -0.7368317 |
| CNR1    | -1.2189674 |
| CNST    | -0.682714  |
| CNTF    | -0.5630128 |
| CNTLN   | -1.2076988 |
| CNTN1   | -0.7127726 |
| CNTN2   | -0.4992032 |
| CNTN6   | -1.5273912 |
| CNTROB  | -1.4542439 |
| COA3    | -0.7074304 |
| COA4    | -0.6501489 |
| COBL    | -0.5287206 |
| COCH    | -0.9359031 |
| COG2    | -0.3392725 |
| COG4    | -0.3838396 |
| COL14A1 | -2.5773685 |
| COL15A1 | -1.8706324 |
| COL16A1 | -1.0234959 |
| COL1A1  | -1.8550992 |
| COL1A2  | -1.3854785 |
| COL26A1 | -2.5316007 |
| COL27A1 | -1.4342406 |
| COL3A1  | -1.1381044 |

|          |            |
|----------|------------|
| COL5A1   | -1.4760485 |
| COL5A2   | -0.510073  |
| COL6A1   | -1.5712943 |
| COL6A2   | -2.066215  |
| COL6A3   | -0.7026472 |
| COL8A2   | -3.1993606 |
| COMT     | -1.1487355 |
| COPS2    | -0.4670234 |
| COPS3    | -0.5592585 |
| COPS4    | -0.4024506 |
| COPZ1    | -0.7193098 |
| COQ9     | -0.5915959 |
| CORO1A   | -0.5954828 |
| CORO2B   | -1.5855441 |
| COX19    | -0.558332  |
| COX20    | -0.7752914 |
| COX6B2   | -3.2975254 |
| COX6C    | -0.5694728 |
| COX7A1   | -0.6597881 |
| COX8B    | -2.6865768 |
| CPLX3    | -2.0317266 |
| CPM      | -1.2290878 |
| CPNE2    | -0.9074688 |
| CPNE4    | -1.4045541 |
| CPNE5    | -1.2648015 |
| CPOX     | -3.2188292 |
| CPQ      | -0.3190193 |
| CPSF3L   | -0.407826  |
| CPT1C    | -1.3251717 |
| CPT2     | -0.7711716 |
| CPXM1    | -1.4770956 |
| CPXM2    | -0.6558569 |
| CPZ      | -1.4509826 |
| CR2      | -1.3124251 |
| CRAT     | -1.8155558 |
| CREBZF   | -0.41749   |
| CREG1    | -0.9570322 |
| CRHR1    | -1.426925  |
| CRIP1    | -1.0993376 |
| CRIP2    | -1.6713252 |
| CRIP3    | -0.8056099 |
| CRISP3   | -3.4122505 |
| CRISPLD1 | -2.6106076 |
| CRKL     | -0.6362467 |
| CRMP1    | -1.4304409 |

|            |            |
|------------|------------|
| CRNKL1     | -0.3120515 |
| CROCC      | -0.55528   |
| CROT       | -0.4461532 |
| CRXOS      | -1.1701262 |
| CRYBA4     | -0.7883091 |
| CRYBB1     | -1.4026549 |
| CRYGS      | -1.397821  |
| CRYL1      | -1.0470371 |
| CSDC2      | -3.640099  |
| CSF1R      | -0.3993669 |
| CSGALNACT1 | -0.8461604 |
| CSGALNACT2 | -0.7067981 |
| CSL        | -0.4010162 |
| CSMD3      | -1.5707288 |
| CSNK1G2    | -0.3535752 |
| CSPG4      | -1.5147042 |
| CSPP1      | -0.6602709 |
| CSRP2      | -0.7266913 |
| CSRP3      | -3.455533  |
| CTBP1      | -0.651773  |
| CTC1       | -0.5061526 |
| CTCFL      | -1.5173054 |
| CTF1       | -0.3297546 |
| CTNND2     | -3.005407  |
| CTSE       | -2.3320088 |
| CTSF       | -2.245235  |
| CTSG       | -1.1105022 |
| CTSW       | -0.7617369 |
| CTTNBP2    | -1.4026358 |
| CTXN1      | -0.7837367 |
| CUEDC1     | -0.8373458 |
| CUEDC2     | -0.6266584 |
| CUL4A      | -1.2221618 |
| CUTA       | -0.5166025 |
| CUTC       | -0.4398806 |
| CUX1       | -0.6750641 |
| CX3CR1     | -3.1579487 |
| CXCR1      | -0.8159263 |
| CXCR3      | -0.7436781 |
| CXXC1      | -0.467876  |
| CXXC5      | -1.4235468 |
| CYB561A3   | -1.0373259 |
| CYB5A      | -1.1230245 |
| CYB5D2     | -0.7857204 |
| CYB5R1     | -0.3947215 |

|            |            |
|------------|------------|
| CYB5R3     | -0.5810866 |
| CYHR1      | -0.4960361 |
| CYP11A1    | -1.6509097 |
| CYP21A1    | -0.4870517 |
| CYP26C1    | -1.3494623 |
| CYP27A1    | -1.7949593 |
| CYP2AB1    | -0.6792736 |
| CYP2D9     | -1.0338192 |
| CYP2E1     | -1.8255486 |
| CYP2J9     | -0.8118377 |
| CYP2S1     | -1.8990395 |
| CYP2T4     | -0.5441363 |
| CYP4B1     | -0.926723  |
| CYP4B1-PS2 | -1.6193752 |
| CYP4F18    | -1.4129467 |
| CYTL1      | -1.1502442 |
| DAAM1      | -1.1697221 |
| DAAM2      | -0.7202289 |
| DACT1      | -1.0275197 |
| DAGLB      | -1.112134  |
| DAK        | -0.7442956 |
| DAND5      | -1.2463462 |
| DAP        | -0.6522164 |
| DAP3       | -0.3852115 |
| DAPK2      | -1.6832848 |
| DARS2      | -1.4426675 |
| DBF4       | -1.2327967 |
| DBNDD1     | -0.7238865 |
| DBP        | -1.3108401 |
| DCAF12     | -0.5565314 |
| DCAF12L1   | -0.7511387 |
| DCAF4      | -0.5675163 |
| DCAF6      | -1.0091944 |
| DCHS1      | -0.8638694 |
| DCK        | -0.7854292 |
| DCLK1      | -0.6776633 |
| DCLK2      | -1.6732826 |
| DCLRE1A    | -1.8366508 |
| DCSTAMP    | -2.0479178 |
| DCT        | -8.654474  |
| DCTN6      | -0.6548734 |
| DCUN1D1    | -0.7589965 |
| DDAH2      | -0.9384399 |
| DDC        | -0.8845553 |
| DDIT4L     | -2.595881  |

|         |            |
|---------|------------|
| DDX11   | -0.5142043 |
| DDX26B  | -0.6159573 |
| DDX4    | -1.2823532 |
| DDX47   | -0.4035401 |
| DEAF1   | -0.788085  |
| DEF8    | -0.7832007 |
| DEFA1   | -0.7474861 |
| DEFA10  | -1.486547  |
| DEFB25  | -1.0300322 |
| DEFB26  | -3.6087394 |
| DEFB29  | -0.7235832 |
| DEFB42  | -1.3278887 |
| DEK     | -1.5905914 |
| DENND1C | -0.4345169 |
| DENND2A | -0.6612406 |
| DENND2C | -2.4041636 |
| DENND6B | -1.0035908 |
| DEPDC1A | -1.5847166 |
| DEPDC1B | -1.7726383 |
| DET1    | -0.3359132 |
| DFNA5   | -2.275434  |
| DFNB59  | -1.2097168 |
| DGCR6   | -0.3297482 |
| DGKG    | -1.8436024 |
| DGKI    | -1.2359669 |
| DHCR24  | -1.7805057 |
| DHCR7   | -0.7795241 |
| DHFR    | -0.6735392 |
| DHRS1   | -0.7665529 |
| DHRS11  | -2.429471  |
| DHRS13  | -1.052798  |
| DHRS3   | -0.3596063 |
| DHX34   | -0.3376799 |
| DIAP3   | -1.3071723 |
| DIO2    | -0.8218014 |
| DIRAS2  | -1.660917  |
| DISC1   | -0.3924177 |
| DKK4    | -1.1660964 |
| DKKL1   | -2.3918078 |
| DLEU2   | -0.8909907 |
| DLG2    | -1.8502498 |
| DLGAP5  | -2.379602  |
| DLL1    | -0.9837656 |
| DLX6OS1 | -0.7433205 |
| DMPK    | -2.5111873 |



|          |            |
|----------|------------|
| DMRTB1   | -0.6150446 |
| DMTN     | -0.591352  |
| DMWD     | -0.3520446 |
| DNA2     | -1.2200513 |
| DNAAF2   | -1.8843157 |
| DNAH8    | -0.7118273 |
| DNAIC1   | -1.5131009 |
| DNAJA4   | -1.3999515 |
| DNAJB1   | -0.9666166 |
| DNAJB2   | -1.8865619 |
| DNAJB3   | -2.5342116 |
| DNAJB4   | -1.1761489 |
| DNAJC10  | -0.4031215 |
| DNAJC28  | -1.1291287 |
| DNAJC4   | -0.5972552 |
| DNAJC6   | -1.6630411 |
| DNAJC9   | -0.893889  |
| DNASE1   | -1.1306314 |
| DNASE1L1 | -1.3274064 |
| DNM1     | -0.9224477 |
| DNMT1    | -1.1805844 |
| DNPH1    | -0.5042567 |
| DNTT     | -2.840774  |
| DOCK2    | -0.4320502 |
| DOK2     | -0.4332652 |
| DOK4     | -1.460253  |
| DOLK     | -0.3311029 |
| DOLPP1   | -0.6865106 |
| DONSON   | -0.4569292 |
| DOS      | -0.6828208 |
| DOT1L    | -0.3964729 |
| DPEP2    | -0.5471354 |
| DPF3     | -2.2119486 |
| DPP8     | -0.3327823 |
| DPPA2    | -1.2815757 |
| DPT      | -1.0076716 |
| DPY19L1  | -0.9592238 |
| DPY30    | -0.7360635 |
| DSC2     | -0.9319928 |
| DSCC1    | -1.2901769 |
| DSN1     | -0.814786  |
| DTWD1    | -0.4313166 |
| DTWD2    | -0.5102866 |
| DTX3     | -0.6187244 |
| DUSP8    | -1.3003118 |

|          |            |
|----------|------------|
| DUT      | -1.0486465 |
| DYM      | -0.568243  |
| DYNLL1   | -0.7319851 |
| DYRK1A   | -0.4672294 |
| DYRK1B   | -0.6620851 |
| DYRK3    | -1.2017899 |
| DYSF     | -1.5861142 |
| E2F1     | -1.7843838 |
| E2F2     | -1.419456  |
| E2F4     | -1.8112602 |
| E2F7     | -1.62148   |
| E2F8     | -2.2767606 |
| EAR1     | -0.7788634 |
| EAR10    | -1.0652881 |
| EAR12    | -0.9508486 |
| EAR2     | -1.0314445 |
| EAR6     | -0.8634095 |
| EAR7     | -1.314434  |
| ECH1     | -1.08077   |
| ECHDC3   | -0.9083371 |
| ECI1     | -0.595551  |
| ECT2     | -1.261908  |
| EDARADD  | -0.404856  |
| EDC3     | -0.6328037 |
| EDRF1    | -0.3174436 |
| EEF1A2   | -1.3238938 |
| EEF1D    | -0.3731618 |
| EEF2K    | -1.3473337 |
| EFCAB12  | -0.6331604 |
| EFCAB5   | -1.2490892 |
| EFCAB9   | -0.8178411 |
| EFEMP1   | -1.5108969 |
| EFHD1    | -2.1981897 |
| EFNB1    | -1.3364668 |
| EFNB3    | -2.2825418 |
| EHBP1L1  | -1.2179375 |
| EHHADH   | -0.3453856 |
| EIF2AK1  | -1.3244109 |
| EIF2D    | -0.7873673 |
| EIF4EBP2 | -0.3780584 |
| ELF5     | -0.6747809 |
| ELK3     | -0.4463158 |
| ELMO3    | -0.8061349 |
| ELN      | -3.0506957 |
| ELOVL6   | -0.5157404 |

|          |            |
|----------|------------|
| ELP4     | -0.3114255 |
| EMC9     | -1.9504089 |
| EME1     | -1.5116193 |
| EMID1    | -1.5698586 |
| EMP3     | -1.0526118 |
| ENDOD1   | -2.4409194 |
| ENG      | -0.4084759 |
| ENGASE   | -0.8122354 |
| ENHO     | -0.9769411 |
| ENKD1    | -0.9876027 |
| ENPP1    | -0.6432948 |
| ENPP3    | -2.2298355 |
| ENPP5    | -0.3887546 |
| ENSA     | -0.5170736 |
| ENTPD5   | -0.5690713 |
| EOMES    | -0.7262068 |
| EP300    | -0.7488952 |
| EPB4.1   | -0.7624598 |
| EPB4.2   | -2.2652988 |
| EPDR1    | -1.7797627 |
| EPHB6    | -0.9140902 |
| EPHX1    | -0.75209   |
| EPHX2    | -0.5858848 |
| EPHX3    | -1.3239641 |
| EPM2AIP1 | -0.449048  |
| EPN1     | -1.7526431 |
| EPOR     | -3.3061824 |
| EPX      | -1.9513164 |
| ERBB2    | -0.3497689 |
| ERC1     | -0.3799923 |
| ERCC6L   | -1.620533  |
| ERI1     | -0.691618  |
| ERI2     | -1.2444205 |
| ERMAP    | -2.688037  |
| ERMP1    | -0.7541304 |
| ERP29    | -0.4479094 |
| ESCO2    | -2.097     |
| ESPL1    | -1.8774109 |
| ESRRG    | -1.0013447 |
| ESYT2    | -0.4897251 |
| ESYT3    | -0.7900887 |
| ETAA1    | -0.9511054 |
| ETHE1    | -1.5220985 |
| ETL4     | -0.6304627 |
| ETV1     | -0.7220099 |

|             |            |
|-------------|------------|
| EVC         | -1.6138957 |
| EVI2A-EVI2B | -0.7368243 |
| EVI5        | -0.8382182 |
| EVI5L       | -0.7047987 |
| EVPL        | -1.368278  |
| EXO1        | -0.8982263 |
| EXOC3L2     | -0.7819297 |
| EXOC6       | -0.6778841 |
| EXOC7       | -0.5350413 |
| EXOC8       | -0.4219358 |
| EXOG        | -0.9480786 |
| EXT1        | -0.4646592 |
| EYA2        | -1.6694851 |
| EZH2        | -1.1195564 |
| F2RL2       | -1.2812321 |
| F5          | -1.7792315 |
| F8          | -1.5031998 |
| FABP7       | -1.516851  |
| FADS1       | -1.9034886 |
| FADS2       | -2.1583862 |
| FADS3       | -1.84799   |
| FAF1        | -0.7277565 |
| FAHD1       | -2.2151637 |
| FAIM3       | -1.8129249 |
| FAM105A     | -0.6743789 |
| FAM109B     | -2.522163  |
| FAM110A     | -0.6709895 |
| FAM110B     | -2.0237226 |
| FAM111A     | -1.2270088 |
| FAM117A     | -1.9543395 |
| FAM118B     | -0.3917494 |
| FAM122A     | -1.0098958 |
| FAM122B     | -0.5739145 |
| FAM124A     | -1.8097093 |
| FAM126A     | -1.1293745 |
| FAM129C     | -0.8748465 |
| FAM131A     | -0.6543052 |
| FAM132A     | -2.5466328 |
| FAM132B     | -2.774931  |
| FAM13A      | -0.9070306 |
| FAM167B     | -0.5708871 |
| FAM170B     | -1.5114982 |
| FAM171A1    | -1.1537995 |
| FAM171B     | -1.2241099 |
| FAM173A     | -0.6016107 |

|         |            |
|---------|------------|
| FAM173B | -0.666337  |
| FAM180A | -0.4342675 |
| FAM186B | -0.875494  |
| FAM193A | -0.3972173 |
| FAM195A | -0.3858557 |
| FAM198B | -1.233218  |
| FAM20A  | -0.6139395 |
| FAM20B  | -0.7121801 |
| FAM210B | -1.8306055 |
| FAM212A | -1.6885908 |
| FAM212B | -1.7526557 |
| FAM214B | -1.2765832 |
| FAM216A | -0.6181393 |
| FAM219B | -0.4714608 |
| FAM220A | -0.6474609 |
| FAM227A | -0.328624  |
| FAM229A | -0.439589  |
| FAM53B  | -1.4461446 |
| FAM57B  | -0.9123545 |
| FAM63B  | -0.9597244 |
| FAM64A  | -1.5814595 |
| FAM65A  | -0.604383  |
| FAM69A  | -1.0669398 |
| FAM71D  | -0.5334849 |
| FAM73B  | -1.1176486 |
| FAM78A  | -1.3523035 |
| FAM83D  | -2.154006  |
| FAM89B  | -0.6461425 |
| FAM92B  | -2.6821125 |
| FANCB   | -0.7264223 |
| FANCC   | -0.605633  |
| FANCD2  | -1.8152056 |
| FANCG   | -0.8635931 |
| FANCI   | -1.2411535 |
| FANCL   | -0.9051404 |
| FANCM   | -0.9107928 |
| FARS2   | -0.6035409 |
| FBLN1   | -1.7578158 |
| FBLN5   | -2.745332  |
| FBLN7   | -1.1699371 |
| FBN2    | -1.471128  |
| FBRSL1  | -0.4316678 |
| FBXL15  | -0.8257742 |
| FBXL19  | -0.706769  |
| FBXO10  | -2.0151105 |

|        |            |
|--------|------------|
| FBXO3  | -0.759213  |
| FBXO30 | -1.1005292 |
| FBXO34 | -0.7520394 |
| FBXO41 | -0.83565   |
| FBXO5  | -2.5822153 |
| FBXO7  | -1.3078957 |
| FBXO8  | -0.4455433 |
| FBXO9  | -1.2121906 |
| FBXW4  | -0.5530167 |
| FBXW7  | -0.3946047 |
| FCER1A | -1.1882083 |
| FCER2A | -2.73274   |
| FCGBP  | -0.5080965 |
| FCGRT  | -1.7815752 |
| FCHO1  | -1.4908247 |
| FCHSD1 | -0.5364437 |
| FCNB   | -2.9833186 |
| FCRLA  | -0.9955888 |
| FDPS   | -1.0213647 |
| FECH   | -1.5997257 |
| FEN1   | -1.1513958 |
| FERMT3 | -0.5340986 |
| FFAR4  | -2.2130983 |
| FGD2   | -0.9151149 |
| FGD5   | -0.4328854 |
| FGD6   | -0.717222  |
| FGF1   | -1.6518917 |
| FGFR3  | -0.9445927 |
| FGFR4  | -2.4488847 |
| FGFRL1 | -1.1458883 |
| FH1    | -0.8016834 |
| FHDC1  | -1.5432057 |
| FHL1   | -2.6124005 |
| FHL2   | -1.3673422 |
| FIBIN  | -0.6282249 |
| FIGF   | -2.1768396 |
| FIGNL1 | -1.9816446 |
| FIS1   | -0.47545   |
| FITM1  | -1.7542658 |
| FKBP1B | -0.5551329 |
| FKBP4  | -0.3452864 |
| FKBP7  | -0.9925609 |
| FKBP8  | -0.6039081 |
| FLRT1  | -1.3087633 |
| FLRT2  | -1.0515294 |

|         |            |
|---------|------------|
| FLT3L   | -1.1379313 |
| FMNL1   | -0.3428359 |
| FMO2    | -3.3950844 |
| FMO5    | -1.1376295 |
| FN3K    | -3.888003  |
| FN3KRP  | -2.3954883 |
| FNDC1   | -0.9444981 |
| FNDC5   | -2.8948712 |
| FNTB    | -1.4768176 |
| FOCAD   | -0.3753448 |
| FOLR1   | -2.3893747 |
| FOPNL   | -0.6514387 |
| FOXD2OS | -1.9816666 |
| FOXK2   | -0.5387511 |
| FOXM1   | -1.6484945 |
| FOXO4   | -1.2283776 |
| FRAS1   | -4.061633  |
| FRAT1   | -0.5674996 |
| FREM1   | -1.1754069 |
| FREM3   | -1.0232501 |
| FRMD3   | -2.0965314 |
| FRY     | -1.7404828 |
| FSBP    | -0.9055252 |
| FSD1L   | -0.6885679 |
| FTO     | -0.3198881 |
| FTSJ1   | -1.0007801 |
| FUCA1   | -0.4429379 |
| FUCA2   | -0.5504992 |
| FUNDC1  | -0.4296675 |
| FUNDC2  | -0.7016673 |
| FUT11   | -0.4472516 |
| FUT7    | -2.417105  |
| FUZ     | -0.4295266 |
| FXN     | -1.5443625 |
| FXYD1   | -0.8571358 |
| FXYD2   | -0.4197907 |
| FXYD6   | -1.8202286 |
| FZD2    | -1.6271763 |
| FZD8    | -1.4398766 |
| FZR1    | -1.3998284 |
| G2E3    | -1.0621321 |
| G6B     | -1.2349234 |
| GAB1    | -1.099288  |
| GABBR1  | -0.3295066 |
| GABRA3  | -1.879806  |

|            |            |
|------------|------------|
| GAD1       | -1.0702038 |
| GADD45A    | -1.1292367 |
| GADD45GIP1 | -0.5026474 |
| GAL3ST2    | -0.9029553 |
| GALE       | -0.3398128 |
| GALNT1     | -0.6631155 |
| GALNT10    | -1.70999   |
| GALNT14    | -1.575594  |
| GALNT3     | -0.315661  |
| GAMT       | -1.2759051 |
| GANC       | -0.6342626 |
| GAPT       | -1.891473  |
| GAPVD1     | -0.642045  |
| GAREM      | -2.0409594 |
| GAS2       | -0.9828017 |
| GAS2L1     | -0.5011945 |
| GAS2L3     | -0.9203336 |
| GAS6       | -2.0425348 |
| GATA1      | -2.4793715 |
| GATAD1     | -0.5064478 |
| GATC       | -1.075645  |
| GBA2       | -0.965786  |
| GBP2B      | -1.0668664 |
| GBX2       | -0.9490647 |
| GCDH       | -1.6953526 |
| GCH1       | -1.0303411 |
| GCHFR      | -1.4528143 |
| GCLC       | -1.2735019 |
| GCLM       | -1.7816534 |
| GCNT1      | -0.7577546 |
| GCSAM      | -1.1436903 |
| GDA        | -0.7897272 |
| GDAP1L1    | -0.4758275 |
| GDF1       | -0.6125338 |
| GDF10      | -4.0763273 |
| GDF3       | -2.1425292 |
| GDF6       | -3.4342968 |
| GDPD1      | -1.4850159 |
| GDPD2      | -0.5559726 |
| GDPD4      | -6.5667076 |
| GDPD5      | -0.436816  |
| GDPGP1     | -0.4402316 |
| GEMIN2     | -0.8679078 |
| GEN1       | -1.8163962 |
| GFAP       | -3.1689513 |



|         |            |
|---------|------------|
| GFER    | -1.0759711 |
| GFI1B   | -2.609169  |
| GGA2    | -0.8999004 |
| GID8    | -1.0363564 |
| GIN1    | -1.2051833 |
| GIN51   | -0.9162684 |
| GIN52   | -1.7123508 |
| GIN54   | -1.0767283 |
| GJA3    | -1.5144081 |
| GJB3    | -1.8274179 |
| GLB1L   | -1.0006213 |
| GLI2    | -1.2833829 |
| GLIPR1  | -0.9677076 |
| GLO1    | -0.9696288 |
| GLOD4   | -0.4037218 |
| GLOD5   | -1.1728578 |
| GLRP1   | -1.2553678 |
| GLRX5   | -1.938756  |
| GLTP    | -0.6662831 |
| GM10024 | -1.3293309 |
| GM10046 | -0.4594629 |
| GM10101 | -0.9844513 |
| GM10125 | -0.3729315 |
| GM10134 | -0.8759956 |
| GM10229 | -1.1383188 |
| GM10257 | -0.9827409 |
| GM10336 | -0.5372791 |
| GM10371 | -1.8837125 |
| GM10375 | -0.8691502 |
| GM10419 | -0.6741879 |
| GM10505 | -1.5698164 |
| GM10509 | -0.7328739 |
| GM10516 | -1.2144856 |
| GM10561 | -0.7522392 |
| GM10603 | -0.8602185 |
| GM10614 | -1.116416  |
| GM10638 | -1.31552   |
| GM10639 | -4.1808176 |
| GM10658 | -2.153326  |
| GM10687 | -1.3930221 |
| GM10731 | -0.5176921 |
| GM10745 | -0.4150717 |
| GM10759 | -0.6905069 |
| GM10790 | -1.8809228 |
| GM10824 | -2.054278  |

|         |            |
|---------|------------|
| GM10866 | -0.6312804 |
| GM10910 | -0.8062239 |
| GM10941 | -1.550705  |
| GM11223 | -1.6960492 |
| GM11545 | -2.0896313 |
| GM11564 | -0.5301828 |
| GM11747 | -1.4881485 |
| GM11937 | -0.484977  |
| GM12059 | -1.2000654 |
| GM12247 | -0.6912713 |
| GM12271 | -1.085527  |
| GM12620 | -1.4513288 |
| GM12657 | -0.6191731 |
| GM12666 | -0.941226  |
| GM13032 | -0.7973788 |
| GM13084 | -0.898175  |
| GM1322  | -0.4464827 |
| GM13272 | -0.5846007 |
| GM13275 | -0.6912372 |
| GM13372 | -2.5731711 |
| GM13710 | -1.3450706 |
| GM13861 | -1.2760439 |
| GM14085 | -0.3171628 |
| GM14325 | -0.3876057 |
| GM14420 | -0.6450901 |
| GM14483 | -1.279547  |
| GM14484 | -1.3375151 |
| GM14635 | -1.0944564 |
| GM15645 | -0.9452601 |
| GM15800 | -1.2437239 |
| GM16039 | -0.807987  |
| GM1631  | -1.7605844 |
| GM16500 | -1.5520144 |
| GM16505 | -1.2137878 |
| GM16515 | -2.2573256 |
| GM166   | -2.806266  |
| GM16982 | -1.7334492 |
| GM17748 | -0.6964855 |
| GM17778 | -0.5223515 |
| GM1987  | -0.6113858 |
| GM1993  | -1.4380538 |
| GM20740 | -0.5644827 |
| GM2085  | -0.6223433 |
| GM20939 | -0.4235563 |
| GM2099  | -0.8082857 |

|        |            |
|--------|------------|
| GM2115 | -1.9781172 |
| GM2138 | -0.3595712 |
| GM2155 | -0.7690547 |
| GM2A   | -1.3029814 |
| GM3227 | -1.6967921 |
| GM3258 | -0.5057883 |
| GM3285 | -0.5389297 |
| GM3325 | -1.5281062 |
| GM3604 | -0.8428729 |
| GM3776 | -4.292698  |
| GM3853 | -2.6624308 |
| GM3871 | -0.5787292 |
| GM4035 | -0.8278155 |
| GM4285 | -0.3152683 |
| GM4430 | -1.2937522 |
| GM4673 | -0.4086242 |
| GM4906 | -2.0809574 |
| GM4980 | -0.9926243 |
| GM5068 | -0.7668591 |
| GM5088 | -0.514421  |
| GM5132 | -1.7634363 |
| GM5141 | -1.5695224 |
| GM525  | -0.823602  |
| GM5382 | -1.8871727 |
| GM5463 | -1.5000827 |
| GM5493 | -0.9505062 |
| GM5553 | -0.5914953 |
| GM5570 | -0.7623913 |
| GM5593 | -1.7441654 |
| GM5595 | -0.5155225 |
| GM568  | -2.4556468 |
| GM5751 | -0.807178  |
| GM5767 | -1.3709764 |
| GM5782 | -1.8444138 |
| GM5820 | -2.165197  |
| GM608  | -0.4034424 |
| GM6653 | -1.1422267 |
| GM6760 | -1.4010139 |
| GM6792 | -2.0969768 |
| GM6936 | -1.7356074 |
| GM711  | -1.3663881 |
| GM7664 | -0.5607491 |
| GM7931 | -0.6861167 |
| GM7936 | -0.3775554 |
| GM7968 | -0.3126962 |

|        |            |
|--------|------------|
| GM8005 | -0.944103  |
| GM8013 | -0.7272971 |
| GM8094 | -0.7108467 |
| GM8212 | -1.0008633 |
| GM8220 | -0.7950697 |
| GM8221 | -0.6361642 |
| GM8256 | -0.8519194 |
| GM853  | -0.5607343 |
| GM867  | -3.7185357 |
| GM8817 | -0.5047286 |
| GM9054 | -1.2883465 |
| GM9525 | -1.1267896 |
| GM9530 | -0.8008933 |
| GM9694 | -0.7025933 |
| GM9733 | -2.3090131 |
| GM9767 | -0.6113267 |
| GM9831 | -0.8296549 |
| GM9868 | -1.3984835 |
| GM9895 | -1.5819545 |
| GM9903 | -0.7219908 |
| GM9920 | -0.3676777 |
| GM996  | -0.8543172 |
| GM9992 | -2.540567  |
| GM9999 | -0.5082765 |
| GMEB1  | -0.7726893 |
| GMIP   | -0.3452625 |
| GMNN   | -1.0453434 |
| GMPR   | -1.3847208 |
| GNA12  | -0.8479166 |
| GNA15  | -0.7281609 |
| GNAS   | -0.4432364 |
| GNAZ   | -1.1788199 |
| GNB2   | -1.0201678 |
| GNG11  | -1.232204  |
| GNPAT  | -0.3574672 |
| GNPDA1 | -0.6678972 |
| GOLIM4 | -0.9085741 |
| GOLM1  | -2.2092056 |
| GP1BA  | -0.9559026 |
| GP1BB  | -1.153254  |
| GP5    | -1.3219357 |
| GP6    | -1.251596  |
| GP9    | -2.4057894 |
| GPC1   | -0.6507835 |
| GPC2   | -0.6298595 |

|         |            |
|---------|------------|
| GPC3    | -0.7443867 |
| GPCPD1  | -0.5908275 |
| GPD1    | -2.4000432 |
| GPM6A   | -0.9299152 |
| GPNMB   | -0.6008351 |
| GPR125  | -0.6170304 |
| GPR128  | -0.8747873 |
| GPR133  | -0.3706079 |
| GPR153  | -1.4949827 |
| GPR155  | -1.8901868 |
| GPR162  | -0.565686  |
| GPR19   | -0.8597586 |
| GPR25   | -0.905709  |
| GPR27   | -0.6795449 |
| GPR34   | -2.2153485 |
| GPR88   | -1.8119233 |
| GPR97   | -0.9971952 |
| GPRASP2 | -0.4033897 |
| GPRC5D  | -0.6719875 |
| GPRC6A  | -0.4168823 |
| GPS2    | -1.2394567 |
| GPSM2   | -2.653945  |
| GPSM3   | -0.7371869 |
| GPT     | -0.7045851 |
| GPX1    | -1.0396428 |
| GPX2    | -0.5484099 |
| GPX4    | -1.3580294 |
| GRAMD1C | -0.3696237 |
| GRIA3   | -2.0416617 |
| GRINA   | -0.8822455 |
| GRRP1   | -0.5297878 |
| G RTP1  | -2.4229481 |
| GSDMA   | -0.3176911 |
| GSE1    | -1.728548  |
| GSG1    | -1.3338056 |
| GSG2    | -0.9981341 |
| GSN     | -1.0590706 |
| GSS     | -0.9971523 |
| GSTA4   | -0.7154899 |
| GSTK1   | -0.5599966 |
| GSTM1   | -1.0814719 |
| GSTM3   | -1.2536361 |
| GSTM4   | -0.7033572 |
| GSTM5   | -2.9887552 |
| GSTP1   | -0.8281283 |

|          |            |
|----------|------------|
| GSTP2    | -0.5686784 |
| GSTT1    | -1.5066862 |
| GSTZ1    | -0.4389176 |
| GTF2B    | -0.6335058 |
| GTF2E2   | -0.4756823 |
| GTF3C5   | -0.5807505 |
| GTPBP1   | -0.9846077 |
| GTSE1    | -0.7271295 |
| GUCA1A   | -1.0599144 |
| GUCA2B   | -0.6660337 |
| GUCD1    | -0.7285509 |
| GUCY1A2  | -2.1363237 |
| GUCY1A3  | -2.4017978 |
| GUCY1B3  | -1.0511413 |
| GUF1     | -0.5263717 |
| GYPA     | -2.2994642 |
| GYPC     | -0.7597528 |
| GZMM     | -1.4149754 |
| H1FOO    | -0.5356939 |
| H2AFJ    | -1.0329046 |
| H2AFV    | -1.1256042 |
| H2AFX    | -1.393137  |
| H2-DMA   | -0.5310078 |
| H2-DMB1  | -0.8945198 |
| H2-DMB2  | -0.4820566 |
| H2-EA-PS | -1.1491466 |
| H2-EB1   | -0.8390255 |
| H2-KE6   | -0.5977225 |
| H2-M11   | -1.2501638 |
| H2-OA    | -0.9286366 |
| H2-OB    | -1.0927968 |
| H3F3A    | -0.7062488 |
| HABP4    | -0.4111621 |
| HACE1    | -1.3423266 |
| HACL1    | -1.1819229 |
| HADH     | -0.8161316 |
| HAGH     | -1.9472604 |
| HAGHL    | -0.3489351 |
| HAL      | -0.6780162 |
| HAND2    | -0.6093595 |
| HARS     | -1.5961461 |
| HAUS1    | -0.6652341 |
| HAUS4    | -0.8898091 |
| HAUS5    | -0.8790355 |
| HAUS8    | -2.0004663 |

|           |            |
|-----------|------------|
| HAVCR1    | -0.7462883 |
| HAVCR2    | -0.7646434 |
| HBB-B1    | -0.7029543 |
| HBB-BH1   | -3.0349438 |
| HBQ1A     | -1.4541106 |
| HBQ1B     | -1.4856939 |
| HCFC1     | -0.6112022 |
| HCFC1R1   | -0.7483187 |
| HDAC10    | -0.7684021 |
| HDAC5     | -0.7446795 |
| HDAC7     | -0.4875059 |
| HDGF      | -0.6469312 |
| HDHD1A    | -0.5429184 |
| HDHD3     | -0.6039074 |
| HEATR5A   | -0.3769097 |
| HEBP1     | -1.2050886 |
| HECTD3    | -0.7553539 |
| HELB      | -0.5123887 |
| HELQ      | -1.093575  |
| HEPH      | -1.2013886 |
| HERC1     | -0.7803354 |
| HES6      | -0.4213228 |
| HEXA      | -0.5978475 |
| HEXIM1    | -0.486289  |
| HEY1      | -1.5132093 |
| HEYL      | -1.9564571 |
| HFE       | -1.2738876 |
| HHEX      | -0.854702  |
| HIBCH     | -0.3849821 |
| HIF3A     | -0.4677939 |
| HIGD2A    | -0.7249861 |
| HINT2     | -1.2907948 |
| HIP1      | -0.8601658 |
| HIPK1     | -0.6231427 |
| HIPK2     | -0.8474488 |
| HIRIP3    | -0.6474366 |
| HIST1H1A  | -2.5095272 |
| HIST1H1B  | -2.2383866 |
| HIST1H1C  | -1.0696979 |
| HIST1H1E  | -2.1350708 |
| HIST1H2AA | -1.6809819 |
| HIST1H2AB | -2.0871096 |
| HIST1H2AF | -0.8092265 |
| HIST1H2AH | -0.814136  |
| HIST1H2AK | -0.6788459 |

|             |            |
|-------------|------------|
| HIST1H2AN   | -0.8957171 |
| HIST1H2AO   | -0.7462478 |
| HIST1H2BB   | -1.6908538 |
| HIST1H2BC   | -0.8100143 |
| HIST1H2BP   | -0.4574921 |
| HIST1H2BQ   | -0.8765993 |
| HIST1H3C    | -1.322712  |
| HIST1H3D    | -1.0937715 |
| HIST1H3F    | -1.3342137 |
| HIST1H3G    | -1.302628  |
| HIST1H3I    | -0.9175658 |
| HIST1H4C    | -1.3806558 |
| HIST1H4D    | -1.1444674 |
| HIST1H4H    | -1.1319728 |
| HIST1H4I    | -1.0253773 |
| HIST1H4J    | -1.4457855 |
| HIST1H4K    | -1.081903  |
| HIST2H2AA2  | -0.8749032 |
| HIST2H2AB   | -0.7693741 |
| HIST2H2AC   | -0.6369157 |
| HIST2H2BB   | -1.3325114 |
| HIST2H2BE   | -1.8403947 |
| HIST2H3B    | -2.1241817 |
| HIST2H4     | -1.2142849 |
| HIST3H2BB-P | -0.6645293 |
| HIST4H4     | -1.276052  |
| HJURP       | -1.6414919 |
| HMBS        | -2.367879  |
| HMCEs       | -0.673934  |
| HMCN1       | -1.357811  |
| HMG20B      | -0.4389491 |
| HMGA2-PS1   | -1.031497  |
| HMGB1-RS17  | -0.4296193 |
| HMGB2       | -1.1927795 |
| HMGB3       | -2.2256355 |
| HMGXB4      | -0.5119433 |
| HMMR        | -1.1852522 |
| HNMT        | -0.936291  |
| HNRNPLL     | -0.5879326 |
| HNRNPU      | -0.4581871 |
| HNRNPUL2    | -0.9456091 |
| HOMER2      | -0.6966879 |
| HOOK3       | -0.7156096 |
| HOXC5       | -0.7358091 |
| HPGD        | -2.2199943 |



|         |            |
|---------|------------|
| HPN     | -0.6755605 |
| HPSE2   | -0.4869232 |
| HR      | -1.817111  |
| HRAS    | -1.0997643 |
| HRASLS5 | -1.069077  |
| HRH2    | -0.3738463 |
| HRSP12  | -1.4726701 |
| HS6ST1  | -1.1294839 |
| HS6ST2  | -1.8028035 |
| HSD11B1 | -0.4871717 |
| HSDL2   | -0.8138676 |
| HSPA12A | -1.0891066 |
| HSPA12B | -1.1133823 |
| HSPA2   | -0.3256297 |
| HSPA4L  | -1.4367394 |
| HSPB2   | -1.2391691 |
| HSPB6   | -1.2626224 |
| HSPG2   | -0.9511409 |
| HSPH1   | -0.3723693 |
| HTATIP2 | -0.6165361 |
| HTRA2   | -0.6034894 |
| HVCN1   | -0.8155661 |
| HYAL1   | -1.2287145 |
| HYDIN   | -0.5407083 |
| HYLS1   | -1.0116348 |
| IARS2   | -0.409472  |
| IBA57   | -1.4567332 |
| ICAM4   | -3.9259777 |
| ICAM5   | -0.7999706 |
| ID1     | -1.0857463 |
| ID4     | -0.9959269 |
| IDH1    | -0.8947961 |
| IFFO1   | -0.6760249 |
| IFI27   | -0.9398317 |
| IFI30   | -0.5864325 |
| IFITM10 | -1.0247304 |
| IFNL3   | -0.8655791 |
| IFRD2   | -1.6089759 |
| IFT172  | -0.766057  |
| IFT27   | -0.7663727 |
| IFT80   | -1.2243724 |
| IGDCC3  | -0.8628132 |
| IGF1    | -1.54954   |
| IGFBP2  | -2.1259012 |
| IGFBP4  | -1.4192615 |

|           |            |
|-----------|------------|
| IGFBP6    | -1.8715124 |
| IGH-V3660 | -0.8242841 |
| IGKV4-72  | -0.825563  |
| IGLL1     | -2.8434312 |
| IGSF10    | -1.3404562 |
| IGSF3     | -1.228946  |
| IKZF3     | -0.5173945 |
| IKZF5     | -0.6695552 |
| IL13RA2   | -0.6374042 |
| IL17RE    | -0.8840325 |
| IL1RL1    | -1.4056449 |
| IL22RA2   | -0.5341899 |
| IL31RA    | -1.2548857 |
| IL4       | -0.8587384 |
| IL5RA     | -0.9998815 |
| IL7       | -1.1558645 |
| IL9R      | -1.6111493 |
| ILK       | -0.9793792 |
| ILKAP     | -0.4155712 |
| INCENP    | -1.3274426 |
| INF2      | -0.4260612 |
| INMT      | -1.4004683 |
| INPP5J    | -1.630111  |
| INSL5     | -2.4102595 |
| INSRR     | -0.5364394 |
| INTS1     | -0.5221357 |
| INTS10    | -0.9119926 |
| INTS12    | -0.4081039 |
| INTS4     | -0.6145186 |
| INTS7     | -0.4820719 |
| INTS8     | -0.9187021 |
| IP6K1     | -0.5992918 |
| IP6K3     | -2.7136836 |
| IPP       | -1.1819024 |
| IQCB1     | -0.4653025 |
| IQGAP3    | -1.6150367 |
| IQSEC1    | -0.3855867 |
| IRF2BP1   | -0.4706998 |
| IRS1      | -0.9625104 |
| ISCA1     | -1.6645026 |
| ISCA2     | -1.1500478 |
| ISG20     | -0.6934991 |
| ISLR      | -0.3894994 |
| ISLR2     | -1.1676955 |
| ISOC2B    | -0.6417663 |

|            |            |
|------------|------------|
| ITGA11     | -0.7054343 |
| ITGA2B     | -0.6590681 |
| ITGA6      | -0.7418227 |
| ITGA8      | -3.182877  |
| ITGAX      | -1.2709723 |
| ITGB2L     | -1.3671477 |
| ITGB5      | -1.6573215 |
| ITGB7      | -1.2005386 |
| ITM2A      | -0.592063  |
| IVD        | -0.6017327 |
| IZUMO4     | -0.8925445 |
| JADE3      | -0.8270395 |
| JARID2     | -0.4699326 |
| JMY        | -0.4821336 |
| JOSD1      | -0.7229896 |
| JOSD2      | -2.5235348 |
| JUP        | -0.9209213 |
| K230015D01 | -0.5778711 |
| KALRN      | -0.7096665 |
| KANSL1L    | -0.6716759 |
| KAT2B      | -0.6077061 |
| KAT6A      | -0.3840551 |
| KATNAL1    | -1.65551   |
| KAZALD1    | -3.590602  |
| KAZN       | -0.5027106 |
| KBTBD12    | -2.1773007 |
| KBTBD3     | -1.5790608 |
| KBTBD7     | -0.6711042 |
| KCNA3      | -1.2065852 |
| KCNA7      | -0.762641  |
| KCNAB2     | -0.3020208 |
| KCNB1      | -0.6027815 |
| KCNC1      | -0.9717109 |
| KCND3      | -1.7112007 |
| KCNG2      | -1.0883479 |
| KCNIP3     | -0.7339637 |
| KCNJ10     | -2.3954434 |
| KCNJ16     | -4.009507  |
| KCNJ5      | -0.5463915 |
| KCNJ9      | -0.7023287 |
| KCNK12     | -3.2038326 |
| KCNK4      | -0.5540497 |
| KCNMB4OS2  | -5.5065336 |
| KCNN4      | -2.3545852 |
| KCNS3      | -0.4860117 |

|         |            |
|---------|------------|
| KCP     | -0.7982807 |
| KCTD7   | -0.5524621 |
| KDELC2  | -0.7655604 |
| KDM4C   | -0.5328116 |
| KDM6A   | -0.892509  |
| KDM7A   | -0.8372669 |
| KDM8    | -0.5253997 |
| KEL     | -2.5861812 |
| KHK     | -1.144197  |
| KIF11   | -2.5753224 |
| KIF12   | -1.3638875 |
| KIF13A  | -0.5763354 |
| KIF14   | -1.3620713 |
| KIF15   | -1.9528213 |
| KIF17   | -0.4884133 |
| KIF18A  | -2.3503995 |
| KIF18B  | -2.1497688 |
| KIF20A  | -2.0566125 |
| KIF20B  | -1.2705755 |
| KIF22   | -1.5582147 |
| KIF23   | -1.7977378 |
| KIF24   | -1.4749196 |
| KIF2A   | -0.6747766 |
| KIF2C   | -1.5527585 |
| KIF4    | -2.2002337 |
| KIF5A   | -1.2405262 |
| KIF7    | -0.6874161 |
| KIF9    | -0.9189038 |
| KIFC2   | -0.6384966 |
| KIFC3   | -0.4522557 |
| KIN     | -0.5730186 |
| KISS1R  | -0.803499  |
| KLF1    | -3.7882924 |
| KLF10   | -1.1807761 |
| KLF11   | -0.8155294 |
| KLF3    | -0.838614  |
| KLF5    | -1.3725975 |
| KLHDC2  | -0.5644698 |
| KLHDC3  | -0.525281  |
| KLHDC8B | -1.5556443 |
| KLHL12  | -1.2069659 |
| KLHL13  | -0.9404111 |
| KLHL14  | -2.2736187 |
| KLHL17  | -1.1363912 |
| KLHL25  | -0.7961907 |

|           |            |
|-----------|------------|
| KLHL30    | -1.0203712 |
| KLHL32    | -0.8895538 |
| KLHL7     | -0.7411289 |
| KLHL9     | -0.3663397 |
| KLRA12    | -1.2510109 |
| KLRA16    | -0.638916  |
| KLRA17    | -1.3842733 |
| KLRA22    | -0.7294512 |
| KLRA23    | -0.4131124 |
| KLRA4     | -1.0064697 |
| KLRA5     | -1.2674327 |
| KLRA9     | -1.419626  |
| KLRB1     | -1.323278  |
| KLRB1A    | -0.9170308 |
| KLRB1C    | -1.8509524 |
| KLRB1F    | -1.4029965 |
| KLRE1     | -1.8508713 |
| KLRG1     | -0.957922  |
| KLRI1     | -1.0562263 |
| KLRK1     | -0.6929007 |
| KMO       | -0.4598107 |
| KNSTRN    | -1.7864037 |
| KNTC1     | -2.638028  |
| KPNA1     | -0.3742943 |
| KPNA2     | -0.59617   |
| KRAS      | -0.6433635 |
| KRT10     | -0.5350492 |
| KRT20     | -0.8460589 |
| KRT79     | -0.7747431 |
| KRT86     | -0.6534598 |
| KRTAP12-1 | -2.177911  |
| KRTAP20-2 | -0.753474  |
| KRTAP31-1 | -0.8791618 |
| KRTAP8-1  | -2.4007423 |
| KRTAP9-1  | -0.6398819 |
| KRTCAP3   | -0.3484473 |
| L2HGDH    | -0.467345  |
| L3HYPDH   | -1.4562769 |
| LAGE3     | -0.7060628 |
| LAMA2     | -1.6241465 |
| LAMTOR4   | -0.6661105 |
| LARP7     | -0.6121707 |
| LAT2      | -1.0730219 |
| LBH       | -0.7462053 |
| LBR       | -1.5552406 |

|            |            |
|------------|------------|
| LBX2       | -0.7905946 |
| LCMT1      | -0.7840958 |
| LCT        | -0.7877584 |
| LDHB       | -0.8746283 |
| LDLRAP1    | -1.0226369 |
| LEPREL1    | -0.855258  |
| LEPREL2    | -0.758631  |
| LEPROT     | -0.3495998 |
| LETM2      | -1.0970557 |
| LFNG       | -0.404624  |
| LGALS1     | -0.6700482 |
| LGALS12    | -0.5523703 |
| LGR5       | -2.1348224 |
| LHFPL2     | -1.0492094 |
| LHPP       | -0.8731732 |
| LIG1       | -1.7773614 |
| LILRA5     | -1.2532284 |
| LIMCH1     | -2.6875138 |
| LIMS1      | -0.9103098 |
| LIN37      | -0.4335365 |
| LIN54      | -0.6198092 |
| LIN9       | -0.5266881 |
| LINGO4     | -1.1069913 |
| LIPA       | -1.2746997 |
| LIPN       | -1.7808075 |
| LMAN2L     | -0.5749097 |
| LMBR1      | -1.3175578 |
| LMF2       | -0.458478  |
| LMNA       | -1.979075  |
| LMO1       | -1.044807  |
| LMO2       | -1.4722238 |
| LMTK3      | -1.0441065 |
| LNP        | -0.6372943 |
| LOC1000450 | -2.359019  |
| LOC1000488 | -3.8044708 |
| LOC1010557 | -0.394083  |
| LOC1026333 | -0.6528838 |
| LOC1026336 | -1.1659806 |
| LOC1026376 | -0.9528635 |
| LOC1026387 | -0.4100683 |
| LOC1026407 | -0.4401374 |
| LOC1026415 | -1.2036295 |
| LOC1026418 | -0.4942274 |
| LOC1026420 | -0.7932539 |
| LOC1026423 | -1.5701919 |

|            |            |
|------------|------------|
| LOC1026427 | -0.6608546 |
| LOC1026428 | -0.6140847 |
| LOH12CR1   | -0.7544112 |
| LOXL1      | -0.6333256 |
| LOXL3      | -0.9994605 |
| LPAR2      | -1.0407782 |
| LPAR5      | -0.8573978 |
| LPCAT1     | -1.5724821 |
| LPCAT3     | -1.7079582 |
| LPHN1      | -0.7197392 |
| LPIN1      | -0.6343098 |
| LPIN2      | -1.0397482 |
| LPL        | -0.4226003 |
| LRBA       | -0.3638988 |
| LRCH3      | -1.0222607 |
| LRIG3      | -0.5440114 |
| LRMP       | -1.1601839 |
| LRP2       | -0.7392929 |
| LRR1       | -2.3041792 |
| LRRC14     | -0.4327359 |
| LRRC20     | -2.0022511 |
| LRRC29     | -1.3478618 |
| LRRC30     | -4.369098  |
| LRRC36     | -2.288235  |
| LRRC4B     | -2.6373615 |
| LRRC56     | -1.7376041 |
| LRRC1      | -0.5914998 |
| LRRFIP2    | -0.3272882 |
| LRRN1      | -1.0928469 |
| LRRN2      | -2.617648  |
| LRRN3      | -1.0816345 |
| LRWD1      | -1.1981492 |
| LSM2       | -0.6865239 |
| LSP1       | -0.372983  |
| LTA        | -0.4755735 |
| LTA4H      | -1.0150971 |
| LTB4R1     | -0.9135013 |
| LTBP1      | -0.4848712 |
| LTBP2      | -1.4487162 |
| LTBP3      | -0.7791643 |
| LTC4S      | -1.9586773 |
| LTF        | -2.8951678 |
| LURAP1L    | -1.6205308 |
| LY6G       | -0.7614017 |
| LY6G5B     | -1.2269602 |

|          |            |
|----------|------------|
| LY6G6C   | -1.0304    |
| LY6G6D   | -1.2537997 |
| LY6G6E   | -1.0033438 |
| LY6G6F   | -2.0444272 |
| LYL1     | -1.6408892 |
| LYNX1    | -0.5001946 |
| LYPD6    | -0.6859436 |
| LYPD6B   | -0.481384  |
| LYSMD3   | -0.4677649 |
| M1AP     | -1.5336633 |
| MAB21L2  | -0.4696491 |
| MACF1    | -0.5511346 |
| MACROD1  | -0.433147  |
| MAD1L1   | -1.4051228 |
| MAD2L1   | -0.88518   |
| MAF1     | -0.4650006 |
| MAGEB16  | -2.4896798 |
| MAGEE1   | -0.6157908 |
| MAL      | -1.9823585 |
| MALL     | -0.8417218 |
| MAN2B1   | -0.9898958 |
| MAN2B2   | -0.9556303 |
| MANBA    | -0.747726  |
| MAP2K3   | -1.277205  |
| MAP2K6   | -2.004179  |
| MAP4K2   | -0.8051853 |
| MAP4K5   | -0.8072557 |
| MAPK14   | -0.6682735 |
| MAPK3    | -0.8137946 |
| MAPK4    | -1.0357244 |
| MAPK8IP1 | -1.0305281 |
| MAPK8IP3 | -0.3126173 |
| MAPT     | -1.7037702 |
| MARK3    | -0.5897951 |
| MARVELD1 | -0.4744206 |
| MASP1    | -0.6732757 |
| MAST1    | -0.810812  |
| MAST2    | -1.1321826 |
| MAST4    | -0.3541861 |
| MASTL    | -1.3354225 |
| MATK     | -0.905931  |
| MAVS     | -0.5018783 |
| MAZ      | -1.0177727 |
| MB21D1   | -0.6575885 |
| MBD2     | -0.4642797 |



|         |            |
|---------|------------|
| MBD4    | -1.098475  |
| MBLAC1  | -0.75944   |
| MBNL3   | -1.3590565 |
| MBOAT2  | -3.1172636 |
| MBP     | -0.4139886 |
| MBTPS1  | -0.6512632 |
| MCCC2   | -0.5009449 |
| MCEE    | -1.004081  |
| MCM10   | -1.332901  |
| MCM2    | -1.5062609 |
| MCM3    | -0.7311564 |
| MCM4    | -1.1259341 |
| MCM5    | -1.4542685 |
| MCM6    | -0.8645592 |
| MCM7    | -1.7056909 |
| MCM8    | -0.6811872 |
| MCOLN3  | -1.4389849 |
| MCPH1   | -0.8932266 |
| MCPT8   | -1.886507  |
| MCTP1   | -1.5209558 |
| MDC1    | -1.0100455 |
| MDM1    | -0.732235  |
| MDP1    | -0.4224639 |
| ME2     | -0.6431661 |
| MEAF6   | -0.379806  |
| MED19   | -0.7680483 |
| MED20   | -0.4831295 |
| MED22   | -0.6674423 |
| MED24   | -0.3355517 |
| MED25   | -0.6772394 |
| MED4    | -0.4256253 |
| MED7    | -0.3584251 |
| MED9OS  | -2.2911694 |
| MEF2C   | -0.7570462 |
| MEGF6   | -2.7645133 |
| MEGF9   | -1.329937  |
| MEMO1   | -0.7332082 |
| MEN1    | -0.3821087 |
| MEOX1   | -0.7560704 |
| MEPE    | -0.4709408 |
| MESP2   | -1.649632  |
| MEST    | -2.5747466 |
| METAP1D | -0.6313715 |
| METAP2  | -1.158073  |
| METRNL  | -0.811285  |

|          |            |
|----------|------------|
| METTL24  | -2.4563808 |
| METTL8   | -1.1660326 |
| MFAP2    | -1.4513881 |
| MFAP4    | -1.375463  |
| MFAP5    | -2.0759661 |
| MFHAS1   | -0.402607  |
| MFI2     | -1.2233951 |
| MFN1     | -0.7617149 |
| MFSD11   | -0.7075048 |
| MFSD12   | -1.3685656 |
| MFSD3    | -0.9380817 |
| MGAT1    | -0.3730545 |
| MGAT4B   | -1.0674458 |
| MGLL     | -1.6799517 |
| MGP      | -3.5942726 |
| MGST2    | -0.7500043 |
| MGST3    | -4.5303426 |
| MICAL3   | -1.5599968 |
| MICALL2  | -2.3199487 |
| MID1IP1  | -0.8707447 |
| MIER1    | -0.5831599 |
| MIER3    | -1.4962349 |
| MIIP     | -0.5782523 |
| MINPP1   | -1.4253602 |
| MIOX     | -1.0105357 |
| MIS12    | -1.8807054 |
| MIS18A   | -0.6588855 |
| MIS18BP1 | -1.5492234 |
| MKI67    | -1.8305154 |
| MKKS     | -0.5301485 |
| MKLN1    | -0.594214  |
| MKNK2    | -0.8116407 |
| MKRN1    | -0.9280229 |
| MLANA    | -5.161493  |
| MLC1     | -1.3203073 |
| MLF1     | -0.6440835 |
| MLH3     | -0.5727456 |
| MLST8    | -0.8784695 |
| MMEL1    | -0.9980085 |
| MMGT1    | -0.412777  |
| MMP11    | -1.2524259 |
| MMP12    | -1.0531142 |
| MMP17    | -0.660399  |
| MMP2     | -0.9743636 |
| MMP23    | -0.9357762 |

|          |            |
|----------|------------|
| MMP9     | -1.0223398 |
| MMRN1    | -1.394728  |
| MN1      | -1.0054524 |
| MND1     | -0.5983167 |
| MNS1     | -2.7451754 |
| MOB2     | -0.5838199 |
| MOGAT2   | -1.792141  |
| MORN2    | -1.1883152 |
| MOSPD1   | -0.6012487 |
| MOSPD3   | -1.2411447 |
| MPC2     | -0.5300889 |
| MPG      | -0.8465633 |
| MPHOSPH6 | -1.6449876 |
| MPL      | -0.7391472 |
| MPO      | -1.3247762 |
| MPP1     | -1.0656061 |
| MPP2     | -2.1135495 |
| MPPE1    | -0.8577371 |
| MPST     | -1.5617127 |
| MPV17L2  | -0.571466  |
| MR1      | -0.7032464 |
| MRC1     | -2.551157  |
| MRC2     | -1.4857278 |
| MRI1     | -0.3910751 |
| MRM1     | -1.138453  |
| MRPL14   | -0.6766653 |
| MRPL18   | -0.6295672 |
| MRPL28   | -1.0210223 |
| MRPL4    | -0.4711309 |
| MRPL49   | -0.8431425 |
| MRPL53   | -0.6061201 |
| MRPS11   | -0.6163521 |
| MRPS15   | -0.6195426 |
| MRPS25   | -0.5572929 |
| MRS2     | -0.3114646 |
| MRVI1    | -1.6184602 |
| MS4A1    | -0.6303563 |
| MSH2     | -0.7168069 |
| MSH4     | -0.5566757 |
| MSH5     | -1.8924379 |
| MSH6     | -0.7158833 |
| MSLN     | -0.4957147 |
| MSMP     | -1.1655061 |
| MSRB2    | -1.1324124 |
| MST1     | -2.2878625 |

|          |            |
|----------|------------|
| MST1R    | -1.1659455 |
| MSX1     | -1.4243867 |
| MT3      | -0.6639748 |
| MTA1     | -0.3752747 |
| MTA3     | -1.0246091 |
| MTERF1B  | -0.8778772 |
| MTF1     | -0.321635  |
| MTFP1    | -1.3515606 |
| MTFR1    | -1.3769064 |
| MTHFD1   | -0.6298809 |
| MTHFSD   | -0.5646212 |
| MTL5     | -0.8577738 |
| MTMR14   | -0.3824582 |
| MTMR4    | -0.6181288 |
| MTO1     | -0.4633942 |
| MTSS1L   | -2.5769074 |
| MTURN    | -1.262295  |
| MUC6     | -1.5497818 |
| MUG1     | -0.6574819 |
| MUM1     | -1.0023656 |
| MUP19    | -3.7900162 |
| MUP4     | -1.5889268 |
| MUP-PS12 | -1.1473446 |
| MUS81    | -0.5476785 |
| MUT      | -0.5973134 |
| MVB12B   | -0.938169  |
| MVK      | -0.4227638 |
| MXD3     | -3.3435059 |
| MXD4     | -0.5664907 |
| MXRA7    | -1.6882353 |
| MXRA8    | -0.68629   |
| MYADML2  | -1.6197062 |
| MYB      | -0.912231  |
| MYBL2    | -0.9393311 |
| MYCL     | -1.2836404 |
| MYCT1    | -1.3846033 |
| MYEF2    | -0.7500291 |
| MYH10    | -2.8268147 |
| MYH11    | -0.9900429 |
| MYH7     | -0.8534646 |
| MYH8     | -2.9278328 |
| MYL10    | -0.6041801 |
| MYL12B   | -0.4146247 |
| MYL2     | -0.5081773 |
| MYL4     | -0.4313073 |

|          |            |
|----------|------------|
| MYL6B    | -0.9818199 |
| MYL9     | -2.2166672 |
| MYLIP    | -0.3930678 |
| MYLK3    | -1.8477724 |
| MYLPF    | -1.4838705 |
| MYO18A   | -0.9523573 |
| MYO1D    | -1.0215945 |
| MYO1F    | -0.9973373 |
| MYO9A    | -0.5993276 |
| MYOM3    | -1.8572958 |
| MZB1     | -0.3875666 |
| MZT2     | -0.684701  |
| NAA38    | -0.5074315 |
| NAAA     | -1.5121918 |
| NAALADL1 | -1.8040588 |
| NACAD    | -2.9983034 |
| NADK2    | -1.6831002 |
| NAGA     | -0.9981234 |
| NAGS     | -2.7566538 |
| NAIP2    | -0.33394   |
| NANOS1   | -1.9266958 |
| NANP     | -1.5829422 |
| NANS     | -0.5082755 |
| NAPRT1   | -2.1577954 |
| NARF     | -2.2366583 |
| NAT2     | -1.0493283 |
| NAT6     | -1.6022897 |
| NAT8L    | -1.9280622 |
| NAV1     | -1.2631848 |
| NBEAL2   | -0.7571044 |
| NBN      | -0.6601236 |
| NBR1     | -0.6459026 |
| NCAM1    | -0.4687488 |
| NCAPD2   | -1.7501822 |
| NCAPD3   | -1.383944  |
| NCAPG    | -2.5317376 |
| NCAPG2   | -1.6006923 |
| NCAPH    | -1.5132117 |
| NCAPH2   | -0.9776073 |
| NCBP1    | -0.3439102 |
| NCCRP1   | -0.635392  |
| NCOA4    | -0.7320399 |
| NCOR1    | -0.5773649 |
| NDC1     | -0.8253064 |
| NDC80    | -2.0726063 |

|         |            |
|---------|------------|
| NDE1    | -0.8110352 |
| NDRG4   | -0.8350511 |
| NDST3   | -1.4773726 |
| NDUFA6  | -0.418148  |
| NDUFAF3 | -1.0303268 |
| NDUFB10 | -0.6927853 |
| NDUFB2  | -0.3692536 |
| NDUFB7  | -1.0804377 |
| NDUFB8  | -0.4631991 |
| NDUFB9  | -0.516408  |
| NDUFV1  | -0.5092797 |
| NECAB3  | -0.7854393 |
| NEDD1   | -0.8427787 |
| NEDD4   | -1.0024328 |
| NEIL2   | -0.6322074 |
| NEIL3   | -2.3061428 |
| NEK1    | -1.1059208 |
| NEK2    | -1.1457591 |
| NEK8    | -0.734571  |
| NELFE   | -0.6448059 |
| NET1    | -0.6096239 |
| NETO1   | -0.4908924 |
| NEURL1A | -0.6001484 |
| NFAM1   | -1.140811  |
| NFATC2  | -0.5658116 |
| NFE2    | -2.3351388 |
| NFIA    | -1.6368606 |
| NFIC    | -0.7992673 |
| NFIX    | -1.0734243 |
| NFYA    | -0.8838925 |
| NFYB    | -0.6553569 |
| NGFR    | -1.3547626 |
| NGFRAP1 | -1.3781352 |
| NGP     | -1.4452081 |
| NHEJ1   | -1.2752838 |
| NHLRC2  | -0.657404  |
| NHLRC4  | -2.2032297 |
| NID2    | -1.4997752 |
| NINL    | -2.0157259 |
| NIPA1   | -2.0185347 |
| NIPAL3  | -1.1635003 |
| NIT1    | -0.5077496 |
| NKAIN4  | -2.5597434 |
| NKD1    | -1.28438   |
| NKG7    | -0.8025656 |

|         |            |
|---------|------------|
| NKPD1   | -1.1073017 |
| NKX2-3  | -1.2646785 |
| NKX6-1  | -1.7468104 |
| NLRP4F  | -1.2746086 |
| NLRP5   | -1.1720219 |
| NLRP6   | -0.8778603 |
| NLRX1   | -0.3434985 |
| NME3    | -2.0982966 |
| NME4    | -1.0460024 |
| NME7    | -0.8378313 |
| NME9    | -3.0964603 |
| NMNAT3  | -1.7212868 |
| NMRAL1  | -1.024837  |
| NMUR1   | -0.7761469 |
| NNMT    | -0.444011  |
| NOS1    | -1.3746364 |
| NOS1AP  | -0.6885111 |
| NOSTRIN | -0.3626564 |
| NOTCH3  | -0.8447485 |
| NOTCH4  | -0.58109   |
| NPAS4   | -3.1391897 |
| NPCD    | -0.845012  |
| NPHP1   | -1.2691967 |
| NPRL3   | -0.6969862 |
| NQO1    | -2.6646712 |
| NQO2    | -0.7561879 |
| NRARP   | -1.2648976 |
| NREP    | -2.350584  |
| NRF1    | -0.8480363 |
| NRG2    | -1.3965287 |
| NRGN    | -1.5653768 |
| NRIP3   | -2.9793584 |
| NRL     | -2.3305893 |
| NRM     | -1.3655977 |
| NRN1L   | -0.4166961 |
| NRXN2   | -0.7100647 |
| NSDHL   | -0.7591963 |
| NSL1    | -1.501267  |
| NSMCE1  | -0.8074236 |
| NT5C3   | -0.7910829 |
| NT5DC2  | -1.5410306 |
| NTF3    | -1.4375684 |
| NTN3    | -1.1673999 |
| NTN4    | -2.2290494 |
| NTRK3   | -1.0054944 |

|          |            |
|----------|------------|
| NUAK1    | -2.3614876 |
| NUCB1    | -0.8793974 |
| NUDT1    | -0.7319517 |
| NUDT14   | -0.5296669 |
| NUDT21   | -0.3749604 |
| NUDT4    | -0.952106  |
| NUDT7    | -0.4615834 |
| NUDT9    | -0.7768569 |
| NUF2     | -1.89185   |
| NUGGC    | -1.2584062 |
| NUP155   | -0.807189  |
| NUP35    | -0.7349076 |
| NUP85    | -0.8594446 |
| NUSAP1   | -1.697331  |
| NXNL2    | -1.3428898 |
| NXPE2    | -3.6972203 |
| NXPE4    | -3.1404924 |
| NXPE5    | -1.9325399 |
| NYAP1    | -1.4032047 |
| NYNRIN   | -0.7585464 |
| OARD1    | -0.5136647 |
| OAS1C    | -0.8817759 |
| OAZ1     | -0.5684142 |
| OCA2     | -2.911308  |
| OCM      | -0.4744678 |
| ODC1     | -0.8682642 |
| ODF3B    | -2.7787461 |
| OGDH     | -0.4109464 |
| OGN      | -3.5388138 |
| OIP5     | -1.8027158 |
| OIT3     | -0.774709  |
| OLFM1    | -0.6950057 |
| OLFML1   | -1.6295285 |
| OLFML2B  | -0.6164722 |
| OLFML3   | -1.8909645 |
| OLFR1089 | -0.9445481 |
| OLFR1121 | -1.8863723 |
| OLFR1134 | -0.4464681 |
| OLFR12   | -0.4549527 |
| OLFR1241 | -0.7169604 |
| OLFR1262 | -0.3750639 |
| OLFR1324 | -0.4875021 |
| OLFR1382 | -0.5569696 |
| OLFR1413 | -0.3943727 |
| OLFR1419 | -1.021549  |



|          |            |
|----------|------------|
| OLFR1463 | -2.7945056 |
| OLFR1465 | -1.5538385 |
| OLFR1490 | -0.4428427 |
| OLFR207  | -0.3154171 |
| OLFR222  | -1.0434933 |
| OLFR331  | -1.0019844 |
| OLFR362  | -0.7618215 |
| OLFR380  | -0.4814794 |
| OLFR394  | -0.8861303 |
| OLFR456  | -0.4960556 |
| OLFR495  | -0.9346798 |
| OLFR508  | -0.6164315 |
| OLFR551  | -0.6937316 |
| OLFR631  | -0.7351482 |
| OLFR649  | -0.8765082 |
| OLFR704  | -2.438939  |
| OLFR707  | -0.6788642 |
| OLFR728  | -6.477909  |
| OLFR787  | -1.8234768 |
| OLFR913  | -0.7319131 |
| OLFR94   | -0.8533807 |
| OLFR945  | -0.7045836 |
| OMA1     | -0.4153988 |
| OMP      | -0.4796596 |
| OOSP1    | -0.4301372 |
| OOSP2    | -0.9386284 |
| OPHN1    | -1.6291251 |
| OPLAH    | -0.4708474 |
| OPTN     | -0.7225115 |
| ORC1     | -2.1536307 |
| ORC5     | -1.5243299 |
| ORC6     | -1.0985293 |
| ORMDL1   | -0.651988  |
| ORMDL3   | -1.0271797 |
| OSBP     | -0.4073949 |
| OSBPL1A  | -0.5489349 |
| OSBPL8   | -0.6081619 |
| OSGEP    | -0.6515226 |
| OSGEPL1  | -1.3387318 |
| OTOP1    | -1.1986544 |
| OTUB2    | -1.3425312 |
| OXCT2A   | -1.1388729 |
| OXCT2B   | -1.9832699 |
| OXLD1    | -0.7367311 |
| OXTR     | -0.6559503 |

|          |            |
|----------|------------|
| P2RX1    | -1.0189571 |
| P2RY1    | -1.0974984 |
| PABPC1L  | -0.4372602 |
| PABPC4   | -1.3165808 |
| PABPC4L  | -1.7959211 |
| PABPN1L  | -1.3241546 |
| PACS1    | -0.7526784 |
| PADI2    | -1.1863432 |
| PADI4    | -2.0107167 |
| PAFAH1B3 | -0.6451554 |
| PAICS    | -0.6442475 |
| PAIP2    | -0.4647999 |
| PAK1     | -1.939218  |
| PAK3     | -0.4540682 |
| PALB2    | -1.0954871 |
| PALM     | -0.8038201 |
| PANCT2   | -0.7499316 |
| PANK1    | -1.6674309 |
| PAPLN    | -1.6409919 |
| PAQR4    | -1.9892294 |
| PAQR6    | -2.4593072 |
| PAQR9    | -2.4554913 |
| PARD3B   | -0.9803028 |
| PARD6A   | -0.7717104 |
| PARP1    | -0.75034   |
| PARP16   | -1.1955245 |
| PARP2    | -0.6762781 |
| PARPBP   | -1.6708674 |
| PARVB    | -1.8808854 |
| PARVG    | -0.4657865 |
| PASK     | -1.3095746 |
| PAX3     | -2.2446218 |
| PBK      | -2.4051542 |
| PBX2     | -0.6170554 |
| PBX4     | -1.3978515 |
| PCBD2    | -0.7675552 |
| PCCB     | -0.8544066 |
| PCDH10   | -0.8377185 |
| PCDH11X  | -1.0224156 |
| PCDH12   | -2.26691   |
| PCDH17   | -0.6857307 |
| PCDHAC2  | -1.6780207 |
| PCDHGC5  | -0.9066825 |
| PCGF1    | -0.7310729 |
| PCK1     | -2.3010292 |

|          |            |
|----------|------------|
| PCK2     | -1.0711257 |
| PCMT1    | -0.654726  |
| PCNA     | -0.8931198 |
| PCNP     | -0.3383498 |
| PCNT     | -0.7383475 |
| PCOLCE   | -1.3599143 |
| PCP4     | -2.7627292 |
| PCP4L1   | -1.4716587 |
| PCSK6    | -1.6243615 |
| PCSK9    | -1.3963084 |
| PCX      | -1.6071548 |
| PCYT1A   | -1.4352064 |
| PCYT1B   | -2.8103712 |
| PDAP1    | -0.6911182 |
| PDE2A    | -0.6625824 |
| PDE4A    | -0.6362419 |
| PDE6B    | -0.4727726 |
| PDE6D    | -0.3428249 |
| PDE8B    | -1.1717999 |
| PDGFC    | -0.9073002 |
| PDGFD    | -2.2874832 |
| PDIK1L   | -0.6852949 |
| PDILT    | -2.5882154 |
| PDK2     | -0.9406667 |
| PDLIM2   | -0.3929429 |
| PDLIM3   | -2.7413547 |
| PDS5A    | -0.5433102 |
| PDXP     | -0.6021648 |
| PDZD11   | -0.4625363 |
| PDZD4    | -1.2281706 |
| PDZD7    | -0.715158  |
| PDZD9    | -0.6241083 |
| PDZK1    | -0.3965852 |
| PDZK1IP1 | -2.9425483 |
| PEG12    | -0.7891803 |
| PEG13    | -0.9469562 |
| PEG3     | -1.71013   |
| PER3     | -1.8300564 |
| PEX6     | -0.4610381 |
| PF4      | -0.6455636 |
| PFKFB2   | -0.8199627 |
| PFKM     | -2.535658  |
| PFN3     | -1.0538514 |
| PGAM2    | -1.1663089 |
| PGAP1    | -0.9927635 |

|          |            |
|----------|------------|
| PGAP3    | -0.9147167 |
| PGLYRP1  | -0.9673352 |
| PGM2L1   | -0.9587855 |
| PGP      | -1.0836143 |
| PGRMC2   | -0.5389333 |
| PHACTR2  | -0.7227888 |
| PHACTR4  | -0.7895484 |
| PHF10    | -1.1605816 |
| PHF19    | -0.4451351 |
| PHF2     | -0.5754638 |
| PHF5A    | -0.9952087 |
| PHKA2    | -0.8349328 |
| PHKB     | -0.5887156 |
| PHKG1    | -0.3992333 |
| PHLDA3   | -0.9220724 |
| PHLDB2   | -0.7062588 |
| PHLPP2   | -0.8087597 |
| PHOSPHO2 | -0.3193772 |
| PHYHIP   | -4.005094  |
| PI16     | -1.4626698 |
| PI4K2B   | -1.2941351 |
| PIANP    | -0.8163948 |
| PIDD1    | -1.3441658 |
| PIF1     | -0.9395118 |
| PIGH     | -0.9940226 |
| PIGP     | -0.4538388 |
| PIGQ     | -2.1032028 |
| PIGYL    | -0.5538306 |
| PIH1D1   | -0.5677295 |
| PIK3C2B  | -0.5981677 |
| PIK3R2   | -1.1634607 |
| PIK3R3   | -1.3433583 |
| PIK3R4   | -0.4435463 |
| PILRB2   | -0.7212377 |
| PINK1    | -0.7300458 |
| PIP4K2C  | -0.6503706 |
| PIP5KL1  | -1.1980155 |
| PIR      | -1.9881103 |
| PISD-PS2 | -0.4249861 |
| PITHD1   | -0.6101589 |
| PITPNM2  | -0.6282811 |
| PITPNM3  | -2.5892076 |
| PKHD1L1  | -2.5528128 |
| PKIA     | -0.9284642 |
| PKLR     | -4.154049  |

|          |            |
|----------|------------|
| PKMYT1   | -1.2424212 |
| PKN3     | -0.5365982 |
| PKNOX1   | -0.8204186 |
| PKNOX2   | -1.0630071 |
| PLA2G12A | -0.9521465 |
| PLA2G15  | -0.9492793 |
| PLA2G2E  | -2.664668  |
| PLA2G4C  | -1.7121933 |
| PLCL2    | -0.8897944 |
| PLD4     | -1.7074504 |
| PLEK2    | -2.852916  |
| PLEKHA6  | -2.642561  |
| PLEKHF2  | -0.8699775 |
| PLEKHG5  | -0.8346481 |
| PLEKHJ1  | -0.8362932 |
| PLIN1    | -0.9633138 |
| PLIN3    | -0.5615878 |
| PLK1     | -2.0595121 |
| PLK4     | -1.8608878 |
| PLS1     | -1.2064035 |
| PLSCR2   | -1.1316831 |
| PLSCR4   | -1.550008  |
| PLXDC1   | -2.2239177 |
| PLXDC2   | -0.6372404 |
| PLXNA4   | -1.7570076 |
| PLXNB1   | -1.0220051 |
| PLXNB3   | -2.078739  |
| PMCH     | -0.8790298 |
| PMEL     | -5.1614447 |
| PMF1     | -0.9017386 |
| PMM1     | -1.2736392 |
| PMS2     | -1.2533116 |
| PNCK     | -0.93679   |
| PNKP     | -0.5541401 |
| PNLDC1   | -0.955672  |
| PNMA3    | -0.6417174 |
| PNP      | -0.696425  |
| PNP2     | -2.4229863 |
| PNPLA6   | -0.5989351 |
| PNPLA7   | -0.6713247 |
| PNPO     | -1.1366644 |
| POC1A    | -1.3621755 |
| PODN     | -2.2697744 |
| PODNL1   | -0.8245063 |
| PODXL    | -1.5767388 |

|          |            |
|----------|------------|
| PODXL2   | -1.4636297 |
| POLA2    | -0.955754  |
| POLD1    | -1.2624621 |
| POLD4    | -0.7046557 |
| POLE     | -0.7156582 |
| POLE2    | -1.2582831 |
| POLE3    | -0.7651691 |
| POLH     | -1.0817149 |
| POLI     | -0.7773848 |
| POLQ     | -1.9351344 |
| POLR2A   | -0.447227  |
| POLR3H   | -0.3523302 |
| POMK     | -0.4480448 |
| POMT1    | -0.8347614 |
| PON2     | -0.6097388 |
| POPDC2   | -3.0675144 |
| POPDC3   | -1.9850099 |
| POSTN    | -1.1519725 |
| POU2F1   | -0.3209624 |
| POU3F4   | -1.2071042 |
| PPA2     | -0.5568733 |
| PPAPDC3  | -1.2482471 |
| PPARG    | -1.5010853 |
| PPBP     | -1.4106808 |
| PPCDC    | -0.4313352 |
| PPCS     | -0.5439172 |
| PPDPF    | -0.3145905 |
| PPEF2    | -1.0007374 |
| PPFIA4   | -2.7543845 |
| PPFIBP2  | -0.4218783 |
| PPIL2    | -0.6523757 |
| PPM1D    | -0.8219771 |
| PPM1E    | -1.8204503 |
| PPM1G    | -0.6421118 |
| PPM1L    | -1.217022  |
| PPOX     | -2.8956127 |
| PPP1CA   | -0.7296333 |
| PPP1CB   | -0.6771293 |
| PPP1CC   | -0.3416872 |
| PPP1R14A | -1.3351154 |
| PPP1R15A | -0.7763987 |
| PPP1R1B  | -0.8497617 |
| PPP1R35  | -1.3453684 |
| PPP1R37  | -0.8251743 |
| PPP1R3C  | -0.9548416 |

|         |            |
|---------|------------|
| PPP1R9A | -1.7330098 |
| PPP1R9B | -0.7966657 |
| PPP2R1B | -0.7991984 |
| PPP2R2B | -1.7352362 |
| PPP2R4  | -1.2409143 |
| PPP2R5B | -1.7358146 |
| PPP2R5D | -0.3759503 |
| PPP2R5E | -0.6330669 |
| PPP4C   | -0.406127  |
| PPP6R2  | -0.505971  |
| PPWD1   | -0.6035729 |
| PQLC1   | -1.7314153 |
| PQLC3   | -0.5527873 |
| PRADC1  | -0.9496393 |
| PRAM1   | -0.7747512 |
| PRC1    | -2.1580925 |
| PRCP    | -0.7052054 |
| PRDM10  | -0.7616501 |
| PRDX2   | -1.9524717 |
| PRDX3   | -0.8414478 |
| PREPL   | -0.5179651 |
| PRG2    | -1.7142081 |
| PRG3    | -1.9266691 |
| PRIM1   | -1.7230282 |
| PRIM2   | -1.388658  |
| PRKAA1  | -0.5082994 |
| PRKAA2  | -1.8102326 |
| PRKAB1  | -0.9287872 |
| PRKAB2  | -0.4140329 |
| PRKAG1  | -1.1251101 |
| PRKAR1B | -0.7046053 |
| PRKAR2B | -2.0842352 |
| PRKCG   | -1.9001255 |
| PRKD2   | -0.3508039 |
| PRKDC   | -0.8214793 |
| PRKG1   | -1.5208626 |
| PRKRA   | -0.8655047 |
| PRL2A1  | -3.2434871 |
| PRL4A1  | -4.666154  |
| PRN     | -0.6127715 |
| PRNP    | -0.4345336 |
| PROCA1  | -0.9354489 |
| PRODH   | -0.4860687 |
| PROKR1  | -0.6067309 |
| PROKR2  | -0.9134035 |

|          |            |
|----------|------------|
| PROSER2  | -0.5480604 |
| PRPH     | -1.3615851 |
| PRR11    | -1.5158265 |
| PRR12    | -0.3190935 |
| PRR5L    | -1.1932528 |
| PRRX2    | -1.2327926 |
| PRSS27   | -1.2221179 |
| PRSS29   | -0.7826846 |
| PRSS33   | -0.721113  |
| PRSS34   | -2.1346827 |
| PRSS50   | -2.9330242 |
| PRSS57   | -2.0871658 |
| PRTN3    | -1.5538397 |
| PRX      | -0.5910637 |
| PSAP     | -0.8543129 |
| PSD      | -0.8708925 |
| PSIP1    | -0.719491  |
| PSMA8    | -0.5340009 |
| PSMC3IP  | -1.2314875 |
| PSMD5    | -1.1891332 |
| PSMD9    | -1.1959243 |
| PSMF1    | -1.1535902 |
| PSORS1C2 | -1.3518274 |
| PSPC1    | -0.4950519 |
| PSRC1    | -1.6772912 |
| PSTPIP1  | -0.4295383 |
| PTDSS2   | -2.4592774 |
| PTGER1   | -1.5761874 |
| PTGR1    | -1.5254683 |
| PTGR2    | -0.8882976 |
| PTGS1    | -1.0219135 |
| PTH1R    | -0.7579351 |
| PTN      | -1.1682787 |
| PTOV1    | -1.0743623 |
| PTP4A3   | -1.6858025 |
| PTPLA    | -0.9245429 |
| PTPLAD2  | -2.486733  |
| PTPN14   | -1.3860872 |
| PTPN6    | -0.4273071 |
| PTPN7    | -1.3938813 |
| PTPRB    | -0.5932322 |
| PTPRO    | -2.264373  |
| PTPRV    | -1.1802051 |
| PTRF     | -0.5906482 |
| PTS      | -0.797091  |



|          |            |
|----------|------------|
| PTTG1    | -1.0660825 |
| PUM2     | -0.3354187 |
| PURB     | -0.3459683 |
| PURG     | -0.69736   |
| PVRL3    | -0.688045  |
| PWWP2A   | -0.3694377 |
| PWWP2B   | -0.5248056 |
| PXMP2    | -1.1476018 |
| PXMP4    | -0.8283711 |
| PXYLP1   | -1.1746299 |
| PYCR2    | -0.6407342 |
| PYGL     | -0.528007  |
| PYGM     | -1.0343897 |
| PYROXD2  | -2.1321752 |
| QARS     | -0.3842983 |
| QPCT     | -1.2725589 |
| R3HDM4   | -1.2723093 |
| R3HDML   | -0.7511635 |
| RAB24    | -0.3848147 |
| RAB27B   | -1.3615377 |
| RAB36    | -1.9159601 |
| RAB37    | -0.73735   |
| RAB38    | -0.4214096 |
| RAB3B    | -1.653173  |
| RAB3D    | -0.3481703 |
| RAB3IL1  | -2.3121333 |
| RAB4A    | -0.7082372 |
| RAB6B    | -1.427557  |
| RABGEF1  | -0.5078745 |
| RACGAP1  | -1.2534709 |
| RAD18    | -0.5979939 |
| RAD21    | -0.5934281 |
| RAD23A   | -1.3744135 |
| RAD50    | -0.4719997 |
| RAD51    | -1.1948571 |
| RAD51AP1 | -1.6844754 |
| RAD51B   | -1.0863619 |
| RAD52    | -0.6027398 |
| RAD54B   | -0.9769633 |
| RAD54L   | -1.8720803 |
| RAG1     | -2.954071  |
| RAG2     | -2.7891526 |
| RAI2     | -0.974469  |
| RALBP1   | -0.3870463 |
| RAMP1    | -1.441761  |

|          |            |
|----------|------------|
| RANBP10  | -1.7170672 |
| RANBP6   | -1.2763722 |
| RANGAP1  | -0.8394542 |
| RAP1GAP  | -0.9844503 |
| RAP2C    | -1.190022  |
| RAPGEF4  | -0.8537209 |
| RAPGEFL1 | -2.981598  |
| RARG     | -0.6024408 |
| RASD2    | -0.9415593 |
| RASGEF1C | -1.9821575 |
| RASGRP2  | -1.5233583 |
| RASGRP4  | -1.4608076 |
| RASL11A  | -1.2400935 |
| RASSF6   | -0.7419417 |
| RASSF7   | -1.4818573 |
| RB1      | -1.4092555 |
| RBBP8    | -0.6425767 |
| RBFA     | -0.4139605 |
| RBFOX1   | -2.093436  |
| RBKS     | -0.8872728 |
| RBL1     | -0.7991166 |
| RBM12B2  | -0.4209867 |
| RBM15    | -0.4097552 |
| RBM24    | -0.7623155 |
| RBM38    | -1.7674932 |
| RBM4     | -0.6811543 |
| RBM43    | -0.4330888 |
| RBM4B    | -0.3712831 |
| RBMX2    | -0.3182108 |
| RBP7     | -2.4487152 |
| RCAN2    | -0.5629494 |
| RCAN3    | -0.6164346 |
| RCBTB2   | -0.4879198 |
| RCHY1    | -0.3797216 |
| RCN3     | -0.8610377 |
| RCOR1    | -0.3686318 |
| RCOR2    | -1.0999019 |
| RCOR3    | -0.7085185 |
| RDH10    | -0.4056478 |
| RDH18-PS | -0.698395  |
| RDM1     | -1.2323427 |
| REC8     | -0.7474408 |
| RECQL    | -0.688005  |
| RECQL4   | -1.6129813 |
| RECQL5   | -0.8534646 |

|        |            |
|--------|------------|
| REDRUM | -2.973472  |
| REEP1  | -1.1589782 |
| REEP2  | -0.4950633 |
| REEP4  | -0.9792104 |
| REEP5  | -0.8545332 |
| REEP6  | -2.0178227 |
| REG4   | -0.7216051 |
| RELL1  | -1.1264591 |
| RELL2  | -2.2361636 |
| RELN   | -1.3470926 |
| RELT   | -0.6496959 |
| REPS2  | -1.9835317 |
| RETN   | -1.3905694 |
| RETNLA | -2.8797104 |
| RETNLG | -1.7779346 |
| REXO2  | -0.3359451 |
| RFC1   | -0.9011383 |
| RFC2   | -1.0550656 |
| RFC3   | -0.4694762 |
| RFC5   | -0.6949034 |
| RFESD  | -2.008132  |
| RFK    | -0.3796682 |
| RFNG   | -0.8232546 |
| RFWD2  | -0.3532071 |
| RFWD3  | -1.1020336 |
| RFX1   | -0.4105463 |
| RFX2   | -3.6055422 |
| RFXANK | -0.798696  |
| RFXAP  | -0.7708013 |
| RGCC   | -1.1686978 |
| RGL2   | -0.7173438 |
| RGL3   | -0.4597492 |
| RGS10  | -2.2404823 |
| RGS12  | -2.019062  |
| RGS14  | -0.9199629 |
| RGS18  | -0.835393  |
| RGS2   | -1.0411372 |
| RGS3   | -0.6141634 |
| RGS7   | -1.683485  |
| RGS7BP | -1.4526889 |
| RHAG   | -2.1571455 |
| RHBDL3 | -0.6411562 |
| RHD    | -3.4256363 |
| RHNO1  | -0.9259486 |
| RHOT2  | -0.4959016 |

|          |            |
|----------|------------|
| RHOX2H   | -2.2146542 |
| RHOX5    | -0.7745595 |
| RIBC1    | -0.408977  |
| RILP     | -0.3770056 |
| RIMBP3   | -0.9184065 |
| RIMS1    | -0.5392721 |
| RIMS3    | -1.424653  |
| RINL     | -0.3688555 |
| RIPPLY2  | -0.7831583 |
| RMI1     | -0.9999075 |
| RMND5B   | -0.5603643 |
| RNASE12  | -2.2278323 |
| RNASE2A  | -1.249917  |
| RNASE6   | -1.5369296 |
| RNASEH2A | -1.0780134 |
| RNASEH2B | -1.0949106 |
| RNASEH2C | -1.3603902 |
| RNASEK   | -0.4458494 |
| RNASEL   | -1.372242  |
| RND2     | -0.8927219 |
| RNF10    | -0.8129344 |
| RNF11    | -1.1068859 |
| RNF123   | -1.9924998 |
| RNF139   | -0.6040139 |
| RNF144A  | -1.283627  |
| RNF144B  | -2.1460145 |
| RNF150   | -1.4109173 |
| RNF152   | -2.1214056 |
| RNF166   | -0.7557902 |
| RNF167   | -0.6081109 |
| RNF168   | -0.611506  |
| RNF187   | -1.0181608 |
| RNF212   | -5.223195  |
| RNF26    | -0.9484778 |
| RNF38    | -0.7816391 |
| RNF43    | -1.0209603 |
| RNF5     | -0.7761664 |
| RNGTT    | -0.5527825 |
| RNU2-10  | -0.4643474 |
| ROBO2    | -1.933681  |
| ROGDI    | -0.6309423 |
| ROPN1L   | -0.4559901 |
| RP9      | -0.5263743 |
| RPA1     | -0.8829103 |
| RPA2     | -1.1246543 |

|          |            |
|----------|------------|
| RPA3     | -0.9733629 |
| RPAIN    | -0.8008251 |
| RPGRIP1L | -1.156245  |
| RPH3AL   | -0.6511946 |
| RPIA     | -0.7038164 |
| RPL10L   | -0.4775999 |
| RPL21    | -0.3872271 |
| RPL3L    | -1.2275405 |
| RPP25L   | -0.8998146 |
| RPRD1B   | -1.1024675 |
| RPS6KA1  | -0.5566006 |
| RPS6KA5  | -0.8014002 |
| RPS6KB2  | -0.3843093 |
| RPS7     | -0.4272852 |
| RRM1     | -2.1023746 |
| RRM2     | -1.9900765 |
| RSF1     | -0.4109147 |
| RSLCAN18 | -0.9224415 |
| RSPH1    | -1.2814827 |
| RSPO1    | -2.5622497 |
| RSPRY1   | -0.6613183 |
| RTN4RL1  | -1.5095189 |
| RTTN     | -0.5841343 |
| RUNX1T1  | -0.7785826 |
| RXFP3    | -2.0904524 |
| RYK      | -1.0441694 |
| RYR1     | -1.113039  |
| S100A1   | -0.7248931 |
| S100A10  | -1.1063452 |
| S100A11  | -0.6841078 |
| S100A14  | -0.8525505 |
| S100A2   | -0.5949042 |
| S100A4   | -0.8029013 |
| S100A5   | -0.7861946 |
| S100A6   | -0.4388447 |
| S100B    | -4.594967  |
| S1PR2    | -0.6019774 |
| S1PR4    | -0.7595668 |
| S1PR5    | -3.6651103 |
| SALL2    | -0.6148982 |
| SAMD1    | -0.8507915 |
| SAMD11   | -2.5329223 |
| SAMD14   | -2.1299624 |
| SAMD3    | -0.8240216 |
| SAMD4    | -2.4862707 |

|           |            |
|-----------|------------|
| SAMD5     | -1.2613659 |
| SAPCD1    | -1.7350268 |
| SAPCD2    | -0.9773717 |
| SARDH     | -1.028038  |
| SASS6     | -0.9835217 |
| SBK1      | -1.4979806 |
| SCAF1     | -0.6524873 |
| SCARB1    | -0.3803692 |
| SCD2      | -0.9383106 |
| SCEL      | -1.1972139 |
| SCG5      | -1.0531044 |
| SCGB2B15  | -0.4248149 |
| SCLT1     | -0.6978905 |
| SCLY      | -0.9315004 |
| SCMH1     | -1.0233676 |
| SCML2     | -2.319101  |
| SCN2B     | -1.1893096 |
| SCN7A     | -0.8672009 |
| SCNM1     | -0.3452401 |
| SCNN1A    | -2.566139  |
| SCOC      | -1.1737292 |
| SCP2      | -0.3971224 |
| SCRN1     | -1.7999382 |
| SCRN3     | -2.4146786 |
| SCUBE1    | -1.9260068 |
| SCUBE2    | -0.783809  |
| SCUBE3    | -1.1139922 |
| SDCCAG8   | -0.5710373 |
| SDHD      | -0.6299262 |
| SDK2      | -1.3617821 |
| SDPR      | -2.3797297 |
| SDSL      | -1.4152865 |
| SEC14L2   | -4.9944715 |
| SEC14L3   | -1.0037134 |
| SEC16B    | -1.605161  |
| SECTM1A   | -2.0229735 |
| SELENBP1  | -2.7169728 |
| SEMA3D    | -0.9341354 |
| SEMA4B    | -0.7363944 |
| SEMA4G    | -1.0802596 |
| SEPHS1    | -0.6247013 |
| SERBP1    | -0.3152356 |
| SERHL     | -0.3401775 |
| SERINC5   | -0.8971839 |
| SERPINA3A | -2.398395  |

|           |            |
|-----------|------------|
| SERPINB10 | -2.1445255 |
| SERPINB3C | -1.0774322 |
| SERPINF1  | -1.3899798 |
| SERTAD2   | -0.6596799 |
| SETD1B    | -0.6926394 |
| SETD8     | -0.7861891 |
| SFRP1     | -2.072903  |
| SFRP2     | -1.9609427 |
| SFRP4     | -2.5728414 |
| SFXN4     | -0.8314681 |
| SGCE      | -0.4618125 |
| SGCG      | -1.4211829 |
| SGK3      | -0.657712  |
| SGOL1     | -2.0514326 |
| SGOL2     | -2.0512824 |
| SH2D1B1   | -1.7829444 |
| SH2D3C    | -0.5980759 |
| SH2D4A    | -3.4723032 |
| SH2D7     | -0.4999511 |
| SH3BGRL2  | -0.4784601 |
| SH3BGRL3  | -0.5339708 |
| SH3BP1    | -0.5593243 |
| SH3D19    | -0.3466518 |
| SH3GLB2   | -0.5003119 |
| SH3KBP1   | -0.542726  |
| SH3PXD2A  | -0.7576857 |
| SH3RF2    | -2.7884579 |
| SH3TC2    | -3.1494622 |
| SH3YL1    | -1.6253474 |
| SHANK2    | -0.4503341 |
| SHCBP1    | -0.9760428 |
| SHISA2    | -1.4643848 |
| SHISA4    | -1.1154573 |
| SHISA9    | -1.2502236 |
| SHROOM3   | -0.7136686 |
| SIGLEC5   | -0.9199536 |
| SIGLECG   | -0.8826842 |
| SIK2      | -0.5593786 |
| SIPA1     | -0.8947101 |
| SIPA1L3   | -0.6953864 |
| SIRPB1A   | -1.523891  |
| SIRPB1B   | -1.4344859 |
| SIRT3     | -0.6367612 |
| SIRT7     | -0.4179478 |
| SIVA1     | -1.071001  |

|             |            |
|-------------|------------|
| SIX5        | -0.5879471 |
| SKA1        | -1.8753333 |
| SKA2        | -2.1460564 |
| SKA3        | -2.4134493 |
| SKAP1       | -0.5630121 |
| SKP2        | -1.069937  |
| SLBP        | -1.9898453 |
| SLC11A2     | -0.9219732 |
| SLC13A2     | -2.485071  |
| SLC13A3     | -1.3632152 |
| SLC14A1     | -2.739832  |
| SLC16A10    | -1.7685068 |
| SLC16A12    | -1.4757757 |
| SLC16A7     | -0.5582738 |
| SLC16A8     | -0.7060471 |
| SLC18B1     | -0.5630803 |
| SLC1A5      | -0.8975625 |
| SLC20A1     | -0.6265245 |
| SLC22A13B-P | -0.7281182 |
| SLC22A20    | -1.8346856 |
| SLC22A23    | -2.2350886 |
| SLC22A4     | -2.0938063 |
| SLC24A3     | -1.1543436 |
| SLC24A5     | -0.9604383 |
| SLC25A1     | -0.5525541 |
| SLC25A21    | -2.2855597 |
| SLC25A37    | -1.9666443 |
| SLC25A38    | -1.9760561 |
| SLC25A39    | -0.6793861 |
| SLC25A42    | -1.4847941 |
| SLC25A44    | -0.5590916 |
| SLC25A51    | -1.2259479 |
| SLC26A1     | -2.3831086 |
| SLC26A10    | -0.8956423 |
| SLC29A1     | -1.1457219 |
| SLC29A4     | -1.2147183 |
| SLC2A3      | -0.6556406 |
| SLC2A4      | -3.126202  |
| SLC2A8      | -1.0217123 |
| SLC30A1     | -0.6304498 |
| SLC30A10    | -4.255364  |
| SLC30A9     | -1.0116205 |
| SLC35B2     | -0.3958321 |
| SLC37A2     | -1.3933289 |
| SLC38A5     | -3.9150515 |



|            |            |
|------------|------------|
| SLC38A8    | -1.2275167 |
| SLC39A8    | -0.5149517 |
| SLC3A1     | -1.8977101 |
| SLC40A1    | -3.8984184 |
| SLC41A3    | -0.6288552 |
| SLC43A1    | -2.288322  |
| SLC43A3    | -0.4577351 |
| SLC45A2    | -2.08886   |
| SLC45A4    | -0.5170436 |
| SLC46A1    | -0.5685482 |
| SLC46A3    | -1.7989712 |
| SLC48A1    | -0.7030988 |
| SLC4A1     | -1.8819761 |
| SLC51A     | -2.1779876 |
| SLC5A11    | -0.9755049 |
| SLC5A2     | -2.1309226 |
| SLC6A12    | -1.3668015 |
| SLC6A13    | -1.8383965 |
| SLC6A20A   | -2.2920642 |
| SLC6A3     | -1.4310727 |
| SLC6A4     | -1.5040703 |
| SLC6A9     | -1.9224167 |
| SLC7A10    | -1.0978539 |
| SLC7A4     | -1.7356114 |
| SLC9A3R2   | -1.6563447 |
| SLC9A9     | -1.9362559 |
| SLC9B2     | -0.9895096 |
| SLCO2B1    | -1.2759838 |
| SLFN14     | -1.4765537 |
| SLIT1      | -0.5174491 |
| SLN        | -4.123721  |
| SLX4       | -0.6057096 |
| SMAD6      | -0.3753259 |
| SMARCA2    | -0.6162243 |
| SMARCA5-PS | -0.5676456 |
| SMARCAL1   | -0.5092955 |
| SMARCC2    | -0.9503799 |
| SMARCD2    | -0.6013961 |
| SMC1A      | -0.5787811 |
| SMC2       | -1.3421993 |
| SMC3       | -1.0015755 |
| SMC4       | -1.2233105 |
| SMCO1      | -0.59447   |
| SMG5       | -0.3615909 |
| SMIM1      | -4.365842  |

|         |            |
|---------|------------|
| SMIM11  | -0.4824009 |
| SMIM14  | -0.4437742 |
| SMIM24  | -1.2480767 |
| SMIM5   | -3.734016  |
| SMIM6   | -2.375866  |
| SMO     | -0.7278748 |
| SMOX    | -1.3096366 |
| SMPD1   | -0.546473  |
| SMPD3   | -1.1697257 |
| SMPD4   | -0.8791995 |
| SNAI2   | -1.099792  |
| SNAP91  | -0.9144592 |
| SNCA    | -1.5203872 |
| SNCAIP  | -1.8510308 |
| SNED1   | -2.7186582 |
| SNIP1   | -0.7554531 |
| SNN     | -0.9562912 |
| SNRNP25 | -1.318655  |
| SNRPN   | -0.5022481 |
| SNX15   | -1.2541566 |
| SNX21   | -0.5695214 |
| SNX22   | -3.5695527 |
| SNX3    | -0.4516311 |
| SNX32   | -1.550739  |
| SOBP    | -0.7102337 |
| SORCS2  | -0.8293185 |
| SORD    | -1.3048782 |
| SORT1   | -0.8600707 |
| SOWAHA  | -1.7151566 |
| SOX10   | -2.8606513 |
| SOX17   | -0.5625126 |
| SOX18   | -1.3950238 |
| SOX4    | -1.1391759 |
| SOX6    | -2.9213505 |
| SOX6OS  | -1.8702505 |
| SP3OS   | -0.3966169 |
| SPAG5   | -2.0093508 |
| SPARCL1 | -0.3992524 |
| SPATA24 | -1.4971075 |
| SPC24   | -1.6243105 |
| SPC25   | -1.8267708 |
| SPDL1   | -1.258193  |
| SPECC1  | -0.7606368 |
| SPEER4C | -0.4115272 |
| SPHK1   | -0.4100676 |

|          |            |
|----------|------------|
| SPIB     | -0.4974012 |
| SPICE1   | -0.6645589 |
| SPIN2C   | -2.013157  |
| SPINK2   | -1.4390185 |
| SPIRE1   | -2.2157876 |
| SPIRE2   | -1.0703225 |
| SPNS2    | -0.5982704 |
| SPNS3    | -1.5170908 |
| SPON2    | -4.501051  |
| SPPL2B   | -1.805409  |
| SPPL3    | -0.8667502 |
| SPRR1A   | -1.2615681 |
| SPRYD4   | -0.3286896 |
| SPSB3    | -0.9126139 |
| SPTA1    | -2.5968266 |
| SPTB     | -1.7654812 |
| SQLE     | -0.6776371 |
| SRBD1    | -0.4461446 |
| SRD5A1   | -1.7898452 |
| SREBF1   | -0.7425213 |
| SREK1IP1 | -0.4690018 |
| SRGAP3   | -1.4303594 |
| SRPK3    | -2.4679403 |
| SRPX     | -1.5950394 |
| SRR      | -0.8249674 |
| SRSF1    | -0.591711  |
| SRSF10   | -0.3915043 |
| SRSF2    | -0.3107147 |
| SSBP3    | -1.6606617 |
| SSC5D    | -0.3657184 |
| SSH1     | -0.504698  |
| SSMEM1   | -0.3777072 |
| SSNA1    | -1.4411225 |
| SSPN     | -1.6155214 |
| SSX2IP   | -2.342643  |
| SSXB10   | -0.4517541 |
| SSXB9    | -0.8790059 |
| ST3GAL1  | -0.4651246 |
| ST3GAL2  | -1.5970106 |
| ST3GAL3  | -0.7524929 |
| ST3GAL5  | -2.3258667 |
| ST3GAL6  | -1.4954805 |
| ST5      | -2.000883  |
| STAB2    | -1.3001533 |
| STAC2    | -0.7568488 |

|          |            |
|----------|------------|
| STAP1    | -0.7521858 |
| STAR     | -1.526155  |
| STARD10  | -2.7577643 |
| STARD8   | -1.024111  |
| STBD1    | -0.7207031 |
| STEAP3   | -2.7736268 |
| STIL     | -2.3243885 |
| STIM1    | -0.3220553 |
| STK10    | -0.5472307 |
| STK11    | -0.7740669 |
| STK16    | -1.2968388 |
| STK35    | -0.5936396 |
| STMN1    | -1.7223401 |
| STOM     | -2.3113627 |
| STOML2   | -0.3289022 |
| STOX1    | -0.8674808 |
| STRA13   | -0.7256093 |
| STRADB   | -1.9456973 |
| STRBP    | -0.6556692 |
| STRM     | -0.5738134 |
| STRN     | -0.8283341 |
| STX17    | -0.4724774 |
| STX2     | -1.9743519 |
| STXBP4   | -0.8165453 |
| STYXL1   | -1.0992379 |
| SUCNR1   | -1.0802221 |
| SULF2    | -0.3416519 |
| SULT5A1  | -2.130644  |
| SUN1     | -1.0884414 |
| SUOX     | -1.6278296 |
| SURF1    | -0.4350605 |
| SUSD1    | -0.8677607 |
| SUSD3    | -0.4276846 |
| SUV420H2 | -1.5112948 |
| SVEP1    | -1.5553203 |
| SVIP     | -3.3769724 |
| SVOPL    | -1.0659022 |
| SVS5     | -0.6702833 |
| SWSAP1   | -0.373265  |
| SYBU     | -0.5385876 |
| SYCE2    | -1.3438349 |
| SYNE1    | -1.672327  |
| SYNE3    | -2.056462  |
| SYNGR1   | -2.4815023 |
| SYNGR4   | -1.528373  |

|          |            |
|----------|------------|
| SYNM     | -1.4422832 |
| SYNRG    | -0.449038  |
| SYT1     | -0.6717236 |
| SYT15    | -1.0545733 |
| SYTL1    | -0.9801893 |
| SYTL2    | -1.0260215 |
| SYTL4    | -1.0361423 |
| TAAR3    | -10.162707 |
| TAAR4    | -2.7224984 |
| TAAR7F   | -0.4476719 |
| TAB1     | -1.0941672 |
| TAB2     | -0.3283291 |
| TAB3     | -0.564723  |
| TAC2     | -6.119728  |
| TACC3    | -1.3683324 |
| TAF12    | -0.6033449 |
| TAF5     | -0.5600576 |
| TAF6     | -0.6419821 |
| TAF8     | -0.5285773 |
| TAF9B    | -0.4526188 |
| TAL1     | -2.9173036 |
| TALDO1   | -0.7625623 |
| TANGO2   | -1.389647  |
| TAPT1    | -1.1247373 |
| TARSL2   | -2.2034683 |
| TBC1D10B | -0.3771615 |
| TBC1D10C | -0.7076116 |
| TBC1D24  | -0.7522557 |
| TBC1D31  | -1.1937721 |
| TBC1D32  | -0.4937446 |
| TBCCD1   | -1.4293461 |
| TBCD     | -0.3849716 |
| TBX2     | -0.4783852 |
| TBX6     | -0.5726826 |
| TBXA2R   | -1.2900686 |
| TBXAS1   | -1.6771088 |
| TCEA3    | -1.581516  |
| TCEAL3   | -0.4727445 |
| TCEAL6   | -0.5974398 |
| TCEAL7   | -1.6250379 |
| TCEAL8   | -1.1063614 |
| TCF15    | -3.860123  |
| TCF19    | -1.7656093 |
| TCF21    | -2.7493396 |
| TCF3     | -1.0965586 |

|          |            |
|----------|------------|
| TCF7L1   | -1.3136182 |
| TCHP     | -0.3860941 |
| TCL1B3   | -0.570977  |
| TCP11    | -1.4841738 |
| TCP11L2  | -0.5275154 |
| TCRG-V1  | -0.4902959 |
| TCSTV3   | -0.8070874 |
| TCTEX1D1 | -0.5737298 |
| TCTN1    | -0.9906888 |
| TEC      | -0.4823556 |
| TECR     | -1.1304569 |
| TEK      | -1.4109261 |
| TEKT2    | -0.7951665 |
| TEN1     | -0.3723512 |
| TERF2IP  | -0.3861969 |
| TERT     | -0.6963427 |
| TESC     | -0.9288721 |
| TESK2    | -0.5611198 |
| TET1     | -0.7493262 |
| TEX15    | -1.2939315 |
| TEX38    | -0.9307194 |
| TEX9     | -0.9062161 |
| TFB1M    | -0.9664688 |
| TFCP2    | -0.3853533 |
| TFDP1    | -0.7545972 |
| TFDP2    | -1.5356503 |
| TFEB     | -1.2805114 |
| TFF1     | -1.0080152 |
| TFPI2    | -0.7810993 |
| TFR2     | -2.6423311 |
| TFRC     | -2.3244152 |
| TGFB1    | -0.7102079 |
| TGFB2    | -0.7353251 |
| TGFBI    | -1.0404158 |
| THAP11   | -0.6127205 |
| THAP6    | -1.0815015 |
| THBS3    | -0.3728352 |
| THEM6    | -1.0002813 |
| THNSL2   | -0.8769281 |
| THRA     | -1.0973787 |
| THRSP    | -4.52496   |
| THSD1    | -0.5870378 |
| THSD4    | -0.5013661 |
| THSD7B   | -2.0275722 |
| THTPA    | -0.4269958 |

|          |            |
|----------|------------|
| THY1     | -1.028482  |
| TIA1     | -0.4323523 |
| TIAM2    | -1.345269  |
| TICRR    | -1.4956627 |
| TIGD3    | -2.0917315 |
| TIMD4    | -1.1996765 |
| TIMELESS | -0.734376  |
| TIMM17B  | -0.8544555 |
| TIMP2    | -1.0784769 |
| TIMP4    | -0.7800574 |
| TIPIN    | -1.3106294 |
| TJP3     | -0.3795939 |
| TK1      | -1.9635735 |
| TKTL1    | -0.9004457 |
| TLCD1    | -1.6682277 |
| TLCD2    | -1.0031147 |
| TLE2     | -0.8239355 |
| TLR11    | -2.5383434 |
| TLR12    | -0.9953251 |
| TLX1     | -2.6635153 |
| TM6SF1   | -0.7148166 |
| TM7SF2   | -0.9501519 |
| TM7SF3   | -0.8498569 |
| TMC6     | -1.3670664 |
| TMC7     | -1.132031  |
| TMC8     | -1.1651926 |
| TMCC2    | -1.1493769 |
| TMEM100  | -1.5048885 |
| TMEM106C | -0.5289516 |
| TMEM107  | -1.8827748 |
| TMEM120B | -1.9851303 |
| TMEM121  | -1.5738428 |
| TMEM129  | -0.8737154 |
| TMEM132A | -2.2968473 |
| TMEM132C | -2.7246127 |
| TMEM134  | -0.5874882 |
| TMEM136  | -0.4683719 |
| TMEM138  | -0.9981496 |
| TMEM141  | -1.1827044 |
| TMEM14A  | -0.3925004 |
| TMEM14C  | -2.2351537 |
| TMEM150B | -1.0458121 |
| TMEM154  | -0.9927921 |
| TMEM174  | -0.5206621 |
| TMEM178B | -0.4409704 |

|          |            |
|----------|------------|
| TMEM179B | -0.5430141 |
| TMEM180  | -1.1299694 |
| TMEM183A | -0.5168619 |
| TMEM184A | -0.7769318 |
| TMEM191C | -0.9583745 |
| TMEM194  | -0.5411248 |
| TMEM200A | -2.5058532 |
| TMEM204  | -0.8463752 |
| TMEM216  | -1.0024128 |
| TMEM218  | -0.8679709 |
| TMEM229A | -2.11955   |
| TMEM234  | -0.485424  |
| TMEM237  | -0.8583026 |
| TMEM246  | -1.4326372 |
| TMEM255A | -1.4397767 |
| TMEM256  | -1.0883374 |
| TMEM29   | -0.6045013 |
| TMEM33   | -0.5853238 |
| TMEM35   | -1.3905401 |
| TMEM37   | -1.0774593 |
| TMEM40   | -1.2959824 |
| TMEM41B  | -0.5866761 |
| TMEM44   | -1.9036043 |
| TMEM54   | -0.702059  |
| TMEM55A  | -0.6759229 |
| TMEM56   | -2.9727201 |
| TMEM57   | -0.4848156 |
| TMEM65   | -0.3913338 |
| TMEM8    | -1.2596722 |
| TMEM80   | -0.3961849 |
| TMEM81   | -0.383498  |
| TMEM86A  | -1.2783518 |
| TMEM86B  | -2.0177977 |
| TMEM9    | -1.534483  |
| TMEM91   | -0.4054506 |
| TMEM98   | -1.7712071 |
| TMLHE    | -0.514235  |
| TMOD1    | -1.9196672 |
| TMPO     | -0.9112902 |
| TMPRSS13 | -1.6770277 |
| TMPRSS6  | -2.1312277 |
| TMTC3    | -0.4118679 |
| TMUB2    | -0.4799261 |
| TMX2     | -0.6180506 |
| TMX4     | -1.1502686 |



|            |            |
|------------|------------|
| TNFAIP8L2  | -0.5984659 |
| TNFRSF14   | -0.7836328 |
| TNFRSF17   | -2.119503  |
| TNFRSF19   | -0.9592145 |
| TNFSF12TNF | -0.8097687 |
| TNFSF13B   | -0.4282246 |
| TNIK       | -1.1322305 |
| TNK1       | -2.0980513 |
| TNK2       | -1.1399546 |
| TNNI2      | -1.8188615 |
| TNNT2      | -2.75401   |
| TNPO2      | -0.6302028 |
| TNRC6B     | -1.0983315 |
| TNXB       | -2.413766  |
| TOB1       | -1.0741994 |
| TOM1L1     | -1.8113236 |
| TONSL      | -2.681294  |
| TOP2A      | -1.6254072 |
| TOPBP1     | -0.4579272 |
| TOR4A      | -0.3681417 |
| TPCN1      | -2.531269  |
| TPM1       | -0.5485244 |
| TPM2       | -1.0726013 |
| TPMT       | -1.6721544 |
| TPP1       | -0.6140404 |
| TPPP       | -3.6736088 |
| TPPP3      | -1.4825418 |
| TPRA1      | -0.8751063 |
| TPRGL      | -0.658793  |
| TPX2       | -1.925436  |
| TRAK2      | -1.3709083 |
| TRAM1      | -0.3756347 |
| TRAPPC10   | -0.5597    |
| TREM2      | -2.5127184 |
| TREML1     | -2.4763613 |
| TREML4     | -0.7972698 |
| TRERF1     | -0.5538387 |
| TREX2      | -1.8500831 |
| TRF        | -0.8517785 |
| TRIAP1     | -0.5100293 |
| TRIM10     | -2.6749501 |
| TRIM15     | -0.6143496 |
| TRIM2      | -0.8269899 |
| TRIM23     | -0.7720256 |
| TRIM24     | -0.6222467 |

|          |            |
|----------|------------|
| TRIM37   | -0.494817  |
| TRIM43B  | -1.4942076 |
| TRIM45   | -0.6900868 |
| TRIM59   | -1.4205241 |
| TRIM7    | -0.7800412 |
| TRIP13   | -0.3124576 |
| TRIP4    | -0.38304   |
| TRMT12   | -1.4992449 |
| TRMT1L   | -0.382719  |
| TRMT44   | -0.8057714 |
| TROAP    | -1.7894442 |
| TRP53BP1 | -0.3607802 |
| TSC22D1  | -1.5109162 |
| TSC22D4  | -0.5148516 |
| TSHZ1    | -0.7515049 |
| TSPAN10  | -2.4534724 |
| TSPAN15  | -0.5289161 |
| TSPAN18  | -0.9392767 |
| TSPAN2   | -1.799156  |
| TSPAN32  | -0.8514767 |
| TSPAN33  | -2.2542715 |
| TSPAN7   | -0.5637627 |
| TSPAN8   | -2.3860998 |
| TSPO2    | -1.4330969 |
| TST      | -1.7394576 |
| TSTD3    | -1.1873822 |
| TTC26    | -0.4975212 |
| TTC34    | -0.745075  |
| TTC39A   | -2.3347144 |
| TTC7     | -0.6306944 |
| TTC9C    | -0.4421592 |
| TTK      | -2.0756125 |
| TTLL1    | -0.8679385 |
| TTLL10   | -0.4478965 |
| TTLL12   | -1.8085847 |
| TTLL5    | -1.6937337 |
| TUBA1B   | -0.4459519 |
| TUBA1C   | -0.4169369 |
| TUBA3A   | -0.872793  |
| TUBA4A   | -1.2009687 |
| TUBA8    | -0.9512868 |
| TUBB1    | -1.4548006 |
| TUBB4A   | -0.86272   |
| TUBB4B   | -1.2198629 |
| TUBD1    | -0.6458316 |

|         |            |
|---------|------------|
| TUBE1   | -0.6273871 |
| TUBG1   | -1.231287  |
| TUBG2   | -0.598371  |
| TUBGCP2 | -0.7709694 |
| TUBGCP3 | -0.9244914 |
| TUBGCP4 | -0.8181558 |
| TUFT1   | -0.8047164 |
| TUSC1   | -1.0679455 |
| TUSC2   | -0.4618778 |
| TUSC3   | -0.4643278 |
| TVP23A  | -0.9142139 |
| TXN2    | -0.3507986 |
| TXNDC5  | -0.6911597 |
| TXNL1   | -0.8029249 |
| TXNRD2  | -1.7519541 |
| TYMS    | -0.8537488 |
| TYMS-PS | -1.5053072 |
| TYROBP  | -0.6153026 |
| TYRP1   | -8.437507  |
| TYW1    | -0.3351073 |
| UAP1    | -0.3196616 |
| UBAC1   | -2.528728  |
| UBASH3A | -0.7972829 |
| UBE2C   | -1.7814035 |
| UBE2E3  | -0.9494491 |
| UBE2H   | -0.4012036 |
| UBE2L6  | -0.7138934 |
| UBE2O   | -1.1307254 |
| UBE2R2  | -0.4933186 |
| UBE2T   | -1.8863976 |
| UBE3B   | -0.6117678 |
| UBIAD1  | -2.347414  |
| UBL7    | -0.4107285 |
| UBR7    | -0.564467  |
| UBXN2B  | -0.9485545 |
| UCP2    | -0.769125  |
| UCP3    | -1.0331359 |
| UEVLD   | -0.8185246 |
| UFSP1   | -1.6669474 |
| UGCG    | -0.3187776 |
| UGT1A6B | -0.7136421 |
| UHRF1   | -1.482368  |
| ULBP1   | -1.2709765 |
| ULK2    | -0.3529866 |
| UNC119  | -1.0474124 |

|          |            |
|----------|------------|
| UNC45BOS | -0.8643858 |
| UNC5CL   | -1.7823901 |
| UNCX     | -0.5120952 |
| UPB1     | -1.6478212 |
| UPK1B    | -0.3728056 |
| UPK3A    | -1.5639088 |
| UPK3B    | -1.8246441 |
| UQCR11   | -0.530787  |
| UQCRC1   | -0.5856834 |
| UROD     | -1.9310169 |
| UROS     | -2.7096224 |
| USHBP1   | -1.2819369 |
| USMG2    | -1.6522915 |
| USP15    | -0.9604788 |
| USP17LD  | -1.6536975 |
| USP21    | -0.7975473 |
| USP25    | -0.7772727 |
| USP32    | -1.1139402 |
| USP39    | -0.7527504 |
| USP45    | -0.7038174 |
| USP46    | -1.3992808 |
| USP49    | -1.9961588 |
| USP6NL   | -0.5904861 |
| USP7     | -0.5949631 |
| USP8     | -0.4888921 |
| VAMP1    | -0.9540844 |
| VAMP8    | -0.5090179 |
| VANGL1   | -1.9916453 |
| VAT1L    | -0.9367743 |
| VAV3     | -0.4829536 |
| VBP1     | -0.4080229 |
| VCAM1    | -0.6094694 |
| VCL      | -1.2985477 |
| VEGFB    | -0.5722804 |
| VEZF1    | -0.6871033 |
| VKORC1   | -0.6267805 |
| VKORC1L1 | -0.6216221 |
| VMN1R122 | -1.4700313 |
| VMN1R132 | -0.5738678 |
| VMN1R195 | -2.0832984 |
| VMN1R197 | -1.6070704 |
| VMN1R219 | -1.5680962 |
| VMN1R234 | -0.5467486 |
| VMN1R25  | -0.8646095 |
| VMN1R41  | -0.7337942 |

|         |            |
|---------|------------|
| VMN1R74 | -2.9172711 |
| VMN2R10 | -1.7051015 |
| VMN2R7  | -0.582206  |
| VOPP1   | -0.7242374 |
| VPREB1  | -2.096557  |
| VPREB3  | -1.4225216 |
| VPS13A  | -0.3593421 |
| VPS13C  | -0.7841926 |
| VPS25   | -0.5641866 |
| VPS26B  | -0.4948831 |
| VPS35   | -0.6320682 |
| VRK1    | -1.3804326 |
| VRK2    | -0.7176719 |
| VSIG4   | -2.4368958 |
| VSTM4   | -0.8785117 |
| VSTM5   | -0.5181606 |
| VWA1    | -1.4533968 |
| VWA3A   | -3.8856685 |
| VWCE    | -2.7832003 |
| VWF     | -1.4709516 |
| WAC     | -0.4920254 |
| WAPAL   | -0.5867872 |
| WAS     | -0.4186764 |
| WBP1    | -1.4936666 |
| WBSCR27 | -1.6133857 |
| WBSCR28 | -0.407249  |
| WDPCP   | -0.5973694 |
| WDR26   | -0.6838183 |
| WDR35   | -1.0014744 |
| WDR6    | -0.7582459 |
| WDR60   | -1.1727331 |
| WDR62   | -2.1354508 |
| WDR65   | -2.9483433 |
| WDR70   | -0.4610961 |
| WDR72   | -2.2513247 |
| WDR76   | -0.9770551 |
| WDR81   | -0.6817017 |
| WDR83   | -0.5708356 |
| WDR86   | -0.780231  |
| WDR90   | -1.7712171 |
| WDSUB1  | -0.7812901 |
| WDTC1   | -0.3424168 |
| WEE1    | -1.0078065 |
| WFDC1   | -2.072965  |
| WFDC10  | -2.553173  |

|         |            |
|---------|------------|
| WHSC1   | -0.6954453 |
| WIPI1   | -0.9751611 |
| WIPI2   | -0.7965689 |
| WISP2   | -3.4075687 |
| WNK4    | -1.2165132 |
| WNT10A  | -1.420605  |
| WNT4    | -0.4972496 |
| WNT5A   | -2.0131857 |
| WRN     | -1.6708739 |
| WSCD1   | -0.9240599 |
| WWP1    | -0.824692  |
| XCL1    | -1.535325  |
| XCR1    | -2.6582115 |
| XK      | -2.5756915 |
| XKR5    | -1.7941473 |
| XKRX    | -1.6937683 |
| XPC     | -0.8555665 |
| XPNPEP1 | -0.4999003 |
| XPNPEP2 | -8.723821  |
| XPO7    | -1.1922448 |
| XPR1    | -0.810216  |
| XRCC1   | -0.6673365 |
| XRCC2   | -1.9170227 |
| XRCC3   | -1.3691919 |
| XYLT1   | -1.1010678 |
| YBEY    | -1.1549752 |
| YIPF2   | -0.5625057 |
| YIPF3   | -0.4174261 |
| YME1L1  | -0.7057734 |
| YOD1    | -1.7018895 |
| YPEL3   | -1.1488047 |
| YPEL4   | -1.9163704 |
| YWHAB   | -0.408134  |
| ZBED4   | -0.5991826 |
| ZBTB1   | -0.5125554 |
| ZBTB3   | -0.3879979 |
| ZBTB45  | -1.2929187 |
| ZBTB46  | -0.4104915 |
| ZBTB7A  | -0.6377997 |
| ZBTB8A  | -1.1185722 |
| ZBTBD6  | -2.2421324 |
| ZC3H12B | -0.6166818 |
| ZCCHC17 | -0.3523078 |
| ZCCHC3  | -2.7094536 |
| ZCCHC4  | -0.3780875 |

|         |            |
|---------|------------|
| ZDHHC1  | -0.3349772 |
| ZDHHC14 | -1.317378  |
| ZDHHC22 | -1.6615362 |
| ZDHHC24 | -0.6759605 |
| ZDHHC7  | -0.556912  |
| ZFAND2B | -0.9916501 |
| ZFAND4  | -1.402848  |
| ZFAT    | -0.458921  |
| ZFHX2OS | -1.5384488 |
| ZFP101  | -1.2820406 |
| ZFP108  | -1.5456462 |
| ZFP114  | -1.2770967 |
| ZFP142  | -0.389025  |
| ZFP180  | -1.1953354 |
| ZFP212  | -0.3718891 |
| ZFP235  | -0.6148677 |
| ZFP251  | -0.3729115 |
| ZFP280B | -0.4466863 |
| ZFP286  | -0.4222961 |
| ZFP316  | -0.5378008 |
| ZFP322A | -0.725934  |
| ZFP324  | -0.7078862 |
| ZFP335  | -0.4160986 |
| ZFP346  | -0.9962454 |
| ZFP35   | -0.6682029 |
| ZFP354B | -1.6835785 |
| ZFP367  | -1.2680058 |
| ZFP385A | -0.7070706 |
| ZFP385C | -1.6843681 |
| ZFP39   | -1.7052426 |
| ZFP395  | -1.0596411 |
| ZFP41   | -0.5425355 |
| ZFP410  | -0.8162298 |
| ZFP414  | -0.6209869 |
| ZFP467  | -1.0218556 |
| ZFP473  | -0.5449295 |
| ZFP521  | -1.1174569 |
| ZFP526  | -1.0145118 |
| ZFP599  | -0.3495915 |
| ZFP62   | -0.3635387 |
| ZFP664  | -0.4857431 |
| ZFP672  | -0.7608104 |
| ZFP688  | -0.5290675 |
| ZFP704  | -1.2261999 |
| ZFP710  | -0.6357179 |

|          |            |
|----------|------------|
| ZFP758   | -0.4178026 |
| ZFP760   | -1.5455856 |
| ZFP763   | -0.5432258 |
| ZFP786   | -0.5452118 |
| ZFP808   | -2.6507978 |
| ZFP821   | -0.3988338 |
| ZFP831   | -0.6985822 |
| ZFP91    | -0.584125  |
| ZFP93    | -0.3689044 |
| ZFP934   | -1.675015  |
| ZFP94    | -0.431231  |
| ZFP949   | -1.2901859 |
| ZFP950   | -0.5406389 |
| ZFP955A  | -0.8498254 |
| ZFPM1    | -2.4027967 |
| ZFR      | -0.4246643 |
| ZFR2     | -0.7438886 |
| ZFYVE1   | -0.7755551 |
| ZFYVE21  | -0.7918496 |
| ZGRF1    | -0.9330328 |
| ZIC1     | -0.4905446 |
| ZKSCAN14 | -0.5262413 |
| ZKSCAN3  | -0.664813  |
| ZKSCAN4  | -1.3622658 |
| ZMAT2    | -0.6825581 |
| ZMYM1    | -0.6540909 |
| ZMYND8   | -0.7502828 |
| ZNRD1AS  | -0.7300906 |
| ZPBP2    | -0.4979899 |
| ZRANB3   | -1.2627873 |
| ZRSR1    | -0.4734397 |
| ZSCAN2   | -0.8111627 |
| ZSCAN30  | -0.4952853 |
| ZSWIM3   | -0.9887958 |
| ZW10     | -0.7369008 |
| ZWILCH   | -1.293725  |
| AARD     | 2.9264567  |
| AASS     | 0.7194123  |
| AATF     | 0.5294614  |
| ABCA1    | 1.5887165  |
| ABCA14   | 0.8295531  |
| ABCA16   | 0.98251677 |
| ABCA4    | 1.7929916  |
| ABCA5    | 0.8301854  |
| ABCB1B   | 1.0648994  |



|          |            |
|----------|------------|
| ABCC1    | 0.98258305 |
| ABCC12   | 0.725898   |
| ABHD11OS | 0.5673828  |
| ABHD12B  | 0.5779648  |
| ABHD17B  | 0.7068577  |
| ABHD17C  | 0.514915   |
| ABHD3    | 1.0426486  |
| ABL2     | 0.9304495  |
| ABTB2    | 1.6409831  |
| ACAA1A   | 0.4159875  |
| ACACB    | 0.6384473  |
| ACADSB   | 0.47782993 |
| ACBD3    | 0.7425499  |
| ACER2    | 2.1663282  |
| ACKR3    | 0.7997894  |
| ACOT10   | 0.6096859  |
| ACOT7    | 0.37121296 |
| ACOT9    | 0.5415015  |
| ACOX2    | 1.6615093  |
| ACOXL    | 0.44751954 |
| ACP2     | 0.50127316 |
| ACP5     | 1.1702256  |
| ACPP     | 1.4882972  |
| ACR      | 0.79655266 |
| ACSL4    | 1.0874901  |
| ACTR3    | 0.5899701  |
| ACTRT2   | 1.3357868  |
| ACVR1    | 0.65257883 |
| ACVR1B   | 1.3582897  |
| ACY1     | 0.55962944 |
| ADAM15   | 0.48667717 |
| ADAM3    | 1.9029357  |
| ADAM32   | 1.4926698  |
| ADAM9    | 2.0938568  |
| ADAMTS1  | 3.169723   |
| ADAMTS14 | 0.6954889  |
| ADAMTS15 | 3.3355103  |
| ADAMTS4  | 5.7920594  |
| ADAMTS5  | 0.8267715  |
| ADAMTS7  | 1.3835282  |
| ADAMTS9  | 2.7924032  |
| ADAMTSL4 | 0.76010466 |
| ADAR     | 0.3410735  |
| ADARB1   | 0.98384094 |
| ADARB2   | 0.98096514 |

|         |            |
|---------|------------|
| ADC     | 0.6313219  |
| ADCK4   | 0.43607473 |
| ADCY4   | 0.36306715 |
| ADH7    | 1.3214028  |
| ADHFE1  | 0.77522564 |
| ADM     | 4.2551875  |
| ADM2    | 0.74992275 |
| ADORA1  | 1.4444842  |
| ADORA2B | 1.1381052  |
| ADPRH   | 0.54336214 |
| ADPRM   | 0.89830494 |
| ADRA2A  | 0.60344887 |
| ADSS    | 0.39845705 |
| AEBP2   | 0.9884367  |
| AEN     | 0.8793168  |
| AFM     | 1.1848011  |
| AFP     | 0.98936176 |
| AGFG1   | 0.32905674 |
| AGPAT9  | 0.49674606 |
| AGT     | 0.75947857 |
| AGTR1A  | 0.56865406 |
| AGTRAP  | 0.5735998  |
| AHCY    | 0.56021595 |
| AHCYL2  | 0.32887554 |
| AHSG    | 3.6212592  |
| AIDA    | 0.36942768 |
| AIM1    | 0.74422073 |
| AIM1L   | 0.77044225 |
| AIMP2   | 0.3467331  |
| AK4     | 3.5241551  |
| AK7     | 2.0738995  |
| AKAP12  | 2.1362176  |
| AKAP2   | 1.8141141  |
| AKIRIN1 | 0.53135204 |
| AKP3    | 0.87751985 |
| AKR1B8  | 0.39211893 |
| AKR1C12 | 0.36020637 |
| AKR1C20 | 1.0899239  |
| AKT3    | 0.5320225  |
| ALAS1   | 0.57023525 |
| ALB     | 2.4617934  |
| ALDH1A2 | 4.194724   |
| ALDH1B1 | 0.81415653 |
| ALDH5A1 | 0.6446097  |
| ALDH6A1 | 0.71353674 |

|          |            |
|----------|------------|
| ALDOA    | 0.9635701  |
| ALDOB    | 3.3195615  |
| ALG1     | 0.72470856 |
| ALG11    | 1.1745868  |
| ALKBH3   | 0.53144217 |
| ALKBH6   | 1.0659518  |
| ALPK1    | 1.2664196  |
| ALPL     | 2.2772493  |
| ALS2CL   | 0.5727639  |
| AMBP     | 3.3548503  |
| AMH      | 1.2005613  |
| AMIGO2   | 0.91863704 |
| AMN      | 1.4306831  |
| AMN1     | 0.5801401  |
| AMOTL1   | 1.1235807  |
| AMY1     | 9.385494   |
| AMY2A5   | 10.997114  |
| ANAPC16  | 0.33147478 |
| ANG      | 4.3402843  |
| ANG2     | 3.9564626  |
| ANG3     | 4.7235494  |
| ANG4     | 5.251401   |
| ANGEL1   | 0.6513996  |
| ANGPT2   | 2.6205568  |
| ANGPTL4  | 0.63204145 |
| ANKFN1   | 1.2709723  |
| ANKIB1   | 0.89825964 |
| ANKMY1   | 1.8430426  |
| ANKRD33B | 1.4446182  |
| ANKRD66  | 0.87442565 |
| ANO5     | 0.9485295  |
| ANXA2    | 1.0368533  |
| ANXA4    | 1.4586077  |
| ANXA8    | 1.1158619  |
| AOAH     | 1.6483393  |
| AP1G1    | 0.68075943 |
| AP4E1    | 1.1786575  |
| APBA3    | 0.4619999  |
| APBB3    | 0.52156305 |
| APCS     | 2.9149477  |
| APOB     | 1.5916584  |
| APOBEC1  | 0.688457   |
| APOC2    | 1.6622367  |
| APOD     | 0.41078877 |
| APOH     | 3.2312045  |

|          |            |
|----------|------------|
| APOL6    | 1.0591233  |
| APOL7A   | 0.57397676 |
| APOLD1   | 2.6703272  |
| APP      | 0.8950167  |
| APPL1    | 0.598608   |
| APRT     | 0.49402046 |
| AQP12    | 3.7728152  |
| AQP3     | 2.0276594  |
| AQP4     | 0.44796968 |
| AQP8     | 2.5255394  |
| AQR      | 0.5912299  |
| ARAP2    | 1.9290438  |
| AREG     | 3.1912873  |
| ARF1     | 0.5491624  |
| ARF3     | 0.75977564 |
| ARF4     | 0.65200615 |
| ARFGEF1  | 0.42312622 |
| ARFIP1   | 0.5281217  |
| ARG2     | 2.7591858  |
| ARHGAP22 | 1.1301012  |
| ARHGAP24 | 1.0045803  |
| ARHGAP26 | 0.5695958  |
| ARHGAP29 | 0.4431827  |
| ARHGAP30 | 0.6590848  |
| ARHGAP31 | 0.9712825  |
| ARHGAP8  | 1.6245646  |
| ARHGDIG  | 1.239001   |
| ARHGEF11 | 0.65872145 |
| ARHGEF15 | 0.63238764 |
| ARHGEF16 | 1.563714   |
| ARHGEF28 | 0.62197757 |
| ARHGEF38 | 1.0516274  |
| ARHGEF5  | 1.1376519  |
| ARHGEF7  | 0.36710787 |
| ARID5A   | 2.1725593  |
| ARID5B   | 1.1777406  |
| ARL1     | 0.732739   |
| ARL14EP  | 1.0281749  |
| ARL14EPL | 2.4782708  |
| ARL15    | 0.5450444  |
| ARL5B    | 0.6246228  |
| ARMCX2   | 0.9537339  |
| ARMCX3   | 0.8440528  |
| ARMCX5   | 0.53113604 |
| ARMCX6   | 1.1605301  |

|          |            |
|----------|------------|
| ARNTL    | 0.393219   |
| ARRDC4   | 1.2887993  |
| ARSJ     | 2.0639658  |
| ARV1     | 0.7105546  |
| ASAH1    | 0.44084167 |
| ASAP3    | 0.8913686  |
| ASB10    | 0.70309496 |
| ASB11    | 1.0361807  |
| ASB13    | 1.0125322  |
| ASB4     | 3.2486506  |
| ASB5     | 1.6252294  |
| ASIC2    | 2.223191   |
| ASIC3    | 0.7702987  |
| ASIC5    | 1.4386771  |
| ASPDH    | 0.7288413  |
| ASPG     | 0.8509884  |
| ASPHD1   | 0.9439268  |
| ASPRV1   | 1.8270445  |
| ASTL     | 0.9680686  |
| ATAD1    | 0.48928404 |
| ATAD3A   | 1.1115007  |
| ATF3     | 2.5969114  |
| ATF4     | 0.79725313 |
| ATF5     | 0.47227144 |
| ATF6     | 0.98618746 |
| ATG10    | 0.49633217 |
| ATG5     | 0.42150927 |
| ATG9B    | 0.52306175 |
| ATM      | 0.6132984  |
| ATP10A   | 0.6643219  |
| ATP10D   | 0.36114073 |
| ATP11A   | 0.71735525 |
| ATP13A1  | 0.4001708  |
| ATP1B3   | 1.0374618  |
| ATP2C2   | 1.5306277  |
| ATP4B    | 1.360502   |
| ATP6V0C  | 0.3572464  |
| ATP6V1A  | 0.42255783 |
| ATP6V1F  | 0.72238064 |
| ATP6V1G3 | 0.728189   |
| ATP8B1   | 1.2061131  |
| ATP9B    | 0.48543406 |
| ATRNL1   | 0.9863219  |
| ATXN10   | 0.7200446  |
| ATXN7    | 0.6733537  |

|            |            |
|------------|------------|
| AUH        | 0.45092964 |
| AURKB      | 1.1772237  |
| AVL9       | 1.0893917  |
| AVPR1A     | 3.5561495  |
| B3GALNT1   | 1.546463   |
| B3GALT5    | 0.79420424 |
| B3GALT6    | 0.5761099  |
| B3GNT2     | 1.2689023  |
| B3GNT7     | 2.012771   |
| B430105A11 | 2.0837343  |
| B4GALT5    | 1.240684   |
| BAAT       | 0.75579643 |
| BAIAP2L1   | 1.2196784  |
| BANF2      | 0.32359695 |
| BASP1      | 1.8538575  |
| BATF       | 2.4558487  |
| BATF2      | 1.7464948  |
| BBC3       | 0.61297226 |
| BBX        | 1.198627   |
| BCAP29     | 0.47294092 |
| BCAR3      | 0.944087   |
| BCAT1      | 2.3834772  |
| BCDIN3D    | 0.39302206 |
| BCKDHB     | 1.888535   |
| BCL10      | 0.57311296 |
| BCL2       | 0.7351556  |
| BCL2A1C    | 2.6534505  |
| BCL2A1D    | 2.7121758  |
| BCL2L10    | 1.0248251  |
| BCL2L11    | 1.0366507  |
| BCL2L14    | 2.079608   |
| BCL2L15    | 1.6842651  |
| BCL3       | 1.9547296  |
| BCL6       | 0.5312166  |
| BCL6B      | 1.2038977  |
| BEND3      | 1.3408699  |
| BEX1       | 1.4506593  |
| BEX2       | 3.5160546  |
| BHLHE40    | 1.8498282  |
| BHMT2      | 0.89137816 |
| BIRC3      | 1.9350433  |
| BLOC1S4    | 0.37110567 |
| BMI1       | 1.0179238  |
| BMP7       | 1.6369331  |
| BMPER      | 2.439581   |

|           |            |
|-----------|------------|
| BMPR2     | 0.9772258  |
| BNIP3     | 2.2024431  |
| BOC       | 1.118988   |
| BOLA2     | 0.56046104 |
| BOP1      | 0.7415924  |
| BPI       | 0.99227214 |
| BPIFB6    | 1.0398657  |
| BPIFB9B   | 0.9336705  |
| BPNT1     | 0.7024293  |
| BRI3      | 0.8564544  |
| BRIX1     | 0.43493748 |
| BROX      | 0.30169153 |
| BST1      | 1.9925318  |
| BST2      | 2.0009046  |
| BTBD17    | 0.73841906 |
| BTBD19    | 0.73154306 |
| BTBD3     | 1.8728399  |
| BTBD9     | 0.5004349  |
| BTG1      | 0.7351656  |
| BTG3      | 0.86337614 |
| BTLA      | 0.51114035 |
| BTN1A1    | 0.448411   |
| BZW1      | 0.32966042 |
| BZW2      | 0.63445234 |
| C1GALT1C1 | 0.31326342 |
| C1QA      | 0.7156954  |
| C1QB      | 0.51039505 |
| C1QBP     | 0.62394047 |
| C1QTNF1   | 0.8152995  |
| C1RA      | 1.357552   |
| C1RB      | 1.0834737  |
| C1S1      | 1.2092171  |
| C1S2      | 1.2778034  |
| C2        | 1.2307281  |
| C3        | 0.7633176  |
| C4B       | 0.41171455 |
| C4BP      | 1.7458436  |
| C5AR1     | 0.54530144 |
| CABLES1   | 0.76251936 |
| CABP2     | 5.800209   |
| CABYR     | 1.7429144  |
| CACNA1A   | 0.8074529  |
| CACNA1B   | 1.307684   |
| CACNA1C   | 0.94790316 |
| CACNA1D   | 0.9402847  |

|          |            |
|----------|------------|
| CACNA1H  | 0.32998633 |
| CACNA1S  | 1.0493393  |
| CACNA2D1 | 0.86897564 |
| CACNB2   | 1.0046697  |
| CACNB3   | 2.1759996  |
| CACNG2   | 1.3872757  |
| CACNG8   | 0.75200295 |
| CAD      | 0.41327286 |
| CADPS2   | 0.44682693 |
| CALCA    | 3.2682657  |
| CALCOCO2 | 0.5393436  |
| CALCR    | 4.3303757  |
| CALCRL   | 0.5377121  |
| CALM1    | 0.381495   |
| CALR3    | 0.69754505 |
| CALU     | 0.5211587  |
| CAMK2B   | 1.8064687  |
| CAMK2D   | 0.40527678 |
| CAMK2N2  | 1.142273   |
| CAMK4    | 2.0663898  |
| CAMKK1   | 1.1214409  |
| CAMTA1   | 1.5414016  |
| CAMTA2   | 0.56477785 |
| CAND1    | 0.32971048 |
| CANX     | 0.6291013  |
| CAPN2    | 0.5463109  |
| CAPZA2   | 0.7067938  |
| CAR12    | 2.4170537  |
| CAR13    | 2.436976   |
| CAR9     | 0.9210212  |
| CARNS1   | 0.6770377  |
| CASC1    | 2.6309507  |
| CASKIN1  | 0.75118494 |
| CASP1    | 0.58240604 |
| CASP4    | 1.7760048  |
| CASP7    | 0.5146618  |
| CASZ1    | 0.8529875  |
| CATSPER2 | 0.6227071  |
| CBFB     | 0.7970872  |
| CBLB     | 1.2152958  |
| CBLC     | 1.3007636  |
| CBS      | 2.650735   |
| CBX4     | 0.44831514 |
| CCBE1    | 1.4670687  |
| CCBL2    | 1.9858742  |



|          |            |
|----------|------------|
| CCDC11   | 2.580039   |
| CCDC114  | 0.5574546  |
| CCDC116  | 1.7179646  |
| CCDC122  | 0.9040735  |
| CCDC160  | 0.8826034  |
| CCDC162  | 0.96893096 |
| CCDC169  | 1.4557214  |
| CCDC172  | 0.46672153 |
| CCDC42OS | 1.6104789  |
| CCDC59   | 0.55708647 |
| CCDC64B  | 1.3911855  |
| CCDC65   | 0.8876014  |
| CCDC79   | 0.41570592 |
| CCDC81   | 5.8092537  |
| CCDC85C  | 0.9450593  |
| CCDC86   | 0.7299061  |
| CCDC89   | 0.5702596  |
| CCK      | 1.5618174  |
| CCKAR    | 3.4742217  |
| CCL11    | 3.6174178  |
| CCL12    | 4.6193776  |
| CCL17    | 4.744754   |
| CCL19    | 0.9184599  |
| CCL2     | 5.3522506  |
| CCL22    | 2.1135173  |
| CCL3     | 4.9520144  |
| CCL4     | 4.180287   |
| CCL5     | 1.5208344  |
| CCL7     | 4.4948425  |
| CCM2L    | 1.2065363  |
| CCND2    | 1.0789857  |
| CCNJL    | 1.8343105  |
| CCNYL1   | 0.915535   |
| CCR5     | 0.91781616 |
| CCR7     | 3.0074916  |
| CCR8     | 1.3972266  |
| CCR9     | 0.3210094  |
| CCRL2    | 2.5199962  |
| CCSER2   | 0.43941402 |
| CCT3     | 0.5991063  |
| CD14     | 4.1083345  |
| CD163L1  | 0.62565184 |
| CD164    | 0.7201443  |
| CD200    | 1.2581453  |
| CD274    | 3.0218487  |

|            |            |
|------------|------------|
| CD28       | 0.49586773 |
| CD300LF    | 1.8059406  |
| CD320      | 0.6665063  |
| CD33       | 0.80995417 |
| CD34       | 1.1506357  |
| CD38       | 2.095446   |
| CD40       | 1.6711459  |
| CD40LG     | 1.0035646  |
| CD44       | 1.0038462  |
| CD46       | 0.7283685  |
| CD55       | 0.9799566  |
| CD6        | 0.6412158  |
| CD63       | 0.9781213  |
| CD69       | 3.2312326  |
| CD70       | 3.776894   |
| CD83       | 1.435224   |
| CD86       | 1.0021572  |
| CD93       | 0.77784824 |
| CDC42BPB   | 0.5650773  |
| CDC42EP2   | 1.0740771  |
| CDC42SE2   | 0.45572424 |
| CDH1       | 1.69382    |
| CDH12      | 0.45103168 |
| CDH17      | 1.3356073  |
| CDH5       | 1.6447005  |
| CDH6       | 2.984588   |
| CDK18      | 1.8368111  |
| CDK5R1     | 2.0885406  |
| CDKAL1     | 0.34369755 |
| CDKL3      | 0.79685473 |
| CDKN1A     | 1.7596741  |
| CDKN2B     | 2.2646983  |
| CDO1       | 0.668828   |
| CDR2L      | 0.9831872  |
| CDV3       | 0.3900981  |
| CEACAM12   | 2.2336411  |
| CEACAM-PS1 | 0.8560505  |
| CEBPB      | 2.1257248  |
| CEBPD      | 1.6457729  |
| CEL        | 9.560032   |
| CELA1      | 5.2530065  |
| CELA2A     | 10.826336  |
| CELA3B     | 11.406601  |
| CELF2      | 0.52863026 |
| CELSR1     | 0.43844223 |

|         |            |
|---------|------------|
| CELSR3  | 1.3609219  |
| CENPB   | 0.67265224 |
| CEP170B | 0.53135014 |
| CEP85L  | 1.2083087  |
| CERS3   | 2.2715225  |
| CERS6   | 1.0435565  |
| CES1C   | 1.7968163  |
| CES1G   | 1.2527792  |
| CES2A   | 0.861228   |
| CES2C   | 0.48026133 |
| CFB     | 2.6256056  |
| CFH     | 0.6654563  |
| CFL2    | 0.5871682  |
| CFLAR   | 1.7871037  |
| CGA     | 1.1637156  |
| CGREF1  | 0.6968701  |
| CH25H   | 1.2295108  |
| CHAC1   | 2.607943   |
| CHCHD4  | 0.85791016 |
| CHD4    | 0.44427776 |
| CHIC1   | 0.6859288  |
| CHIL1   | 0.53530455 |
| CHIL5   | 2.2169094  |
| CHIL6   | 2.8021464  |
| CHL1    | 1.5701149  |
| CHMP2B  | 0.33817816 |
| CHMP4C  | 0.8718047  |
| CHPF    | 0.8174896  |
| CHRM3   | 2.1929777  |
| CHST11  | 1.2347941  |
| CHST14  | 0.47459555 |
| CIART   | 2.2294862  |
| CIPC    | 0.75671816 |
| CIRBP   | 0.8955312  |
| CIRH1A  | 0.6938901  |
| CLCN1   | 0.7020526  |
| CLCN7   | 0.4376278  |
| CLDN1   | 2.9184113  |
| CLDN10  | 0.907249   |
| CLDN11  | 1.0183029  |
| CLDN12  | 1.3128061  |
| CLDN26  | 1.0756013  |
| CLDN3   | 5.3126025  |
| CLDN4   | 0.6790161  |
| CLDN7   | 2.005997   |

|         |            |
|---------|------------|
| CLEC12B | 0.5427451  |
| CLEC2F  | 1.1946969  |
| CLEC2G  | 1.1475754  |
| CLEC4A1 | 1.2998123  |
| CLEC4D  | 1.8068714  |
| CLEC4E  | 3.1510167  |
| CLEC4N  | 0.8770766  |
| CLIC4   | 0.6773634  |
| CLMP    | 1.710834   |
| CLN3    | 0.65311193 |
| CLN5    | 0.58532953 |
| CLPS    | 8.755043   |
| CLSTN2  | 1.138875   |
| CLTB    | 0.7390547  |
| CLU     | 0.70687056 |
| CLVS1   | 0.4215417  |
| CMTM6   | 0.74996376 |
| CMTR1   | 0.66575146 |
| CMTR2   | 0.83079576 |
| CNBD2   | 0.5540416  |
| CNBP    | 0.41194773 |
| CNDP2   | 1.1383991  |
| CNGA4   | 1.2430167  |
| CNIH2   | 0.42628884 |
| CNIH3   | 1.4510176  |
| CNKSR3  | 2.717967   |
| CNN3    | 1.232193   |
| CNOT6L  | 0.44270134 |
| CNTNAP3 | 1.3462152  |
| COBLL1  | 0.7768531  |
| COG5    | 0.58583546 |
| COL22A1 | 3.5265324  |
| COL4A1  | 1.8997579  |
| COL4A2  | 1.5939484  |
| COL7A1  | 1.0611687  |
| COPS7A  | 0.62704897 |
| CORO2A  | 0.4356575  |
| COX15   | 0.43244076 |
| COX18   | 0.58103704 |
| COX8C   | 1.0062835  |
| CP      | 3.2763343  |
| CPA1    | 10.285727  |
| CPA2    | 9.823605   |
| CPA5    | 0.62275815 |
| CPB1    | 12.680012  |

|          |            |
|----------|------------|
| CPEB2    | 1.192069   |
| CPHX1    | 0.57673025 |
| CPLX1    | 0.67799044 |
| CPNE1    | 0.73433065 |
| CPNE8    | 1.218884   |
| CPS1     | 2.2014787  |
| CPSF4L   | 1.1385884  |
| CRB3     | 1.7183006  |
| CREB3    | 0.82386875 |
| CREB3L1  | 0.9539285  |
| CREB3L2  | 0.6433735  |
| CREB3L3  | 0.50530124 |
| CREB3L4  | 1.5632391  |
| CREBL2   | 1.0858455  |
| CREBRF   | 0.65669274 |
| CRELD2   | 0.54234314 |
| CREM     | 2.3412395  |
| CRISPLD2 | 1.8063874  |
| CRLF2    | 0.72201633 |
| CRNN     | 1.6462839  |
| CRTAP    | 0.32921124 |
| CRTC2    | 0.8520441  |
| CRY2     | 0.79830647 |
| CRYAA    | 1.6971607  |
| CRYBA1   | 1.0591877  |
| CRYBA2   | 1.6333218  |
| CRYBB2   | 1.1716051  |
| CRYBB3   | 2.161953   |
| CSF1     | 0.64739084 |
| CSF2     | 3.3582351  |
| CSF2RB   | 1.3804584  |
| CSF2RB2  | 1.4450054  |
| CSF3     | 7.7814903  |
| CSMD2    | 1.0818691  |
| CSNK1E   | 0.4096694  |
| CSPRS    | 0.6565933  |
| CSRNP1   | 2.093122   |
| CST10    | 1.3165917  |
| CST7     | 1.1149683  |
| CSTB     | 1.3973742  |
| CSTF2T   | 0.54972696 |
| CTGF     | 1.6563153  |
| CTH      | 2.1309936  |
| CTLA2A   | 1.7701626  |
| CTLA2B   | 1.4669662  |

|           |            |
|-----------|------------|
| CTLA4     | 3.3691936  |
| CTNND1    | 1.1803946  |
| CTPS      | 0.85453224 |
| CTRB1     | 10.186724  |
| CTRC      | 5.447194   |
| CTRL      | 7.10072    |
| CTSC      | 0.91482973 |
| CTSK      | 0.41522646 |
| CTSL      | 1.237329   |
| CTSS      | 0.48602057 |
| CTSZ      | 1.0448008  |
| CTTNBP2NL | 1.9781923  |
| CTXN2     | 0.94338703 |
| CUBN      | 0.82473207 |
| CUL9      | 0.43715    |
| CUZD1     | 9.773542   |
| CWC27     | 0.70098877 |
| CWF19L2   | 0.64515543 |
| CX3CL1    | 3.5762076  |
| CXCL1     | 7.2812123  |
| CXCL10    | 3.2095752  |
| CXCL12    | 1.516212   |
| CXCL13    | 3.2444267  |
| CXCL14    | 2.764743   |
| CXCL16    | 0.9963064  |
| CXCL2     | 7.023438   |
| CXCL3     | 7.1417766  |
| CXCL5     | 4.157993   |
| CXCL9     | 2.7529125  |
| CXCR5     | 1.0957842  |
| CYB561    | 1.9130921  |
| CYB5B     | 0.5359216  |
| CYB5R2    | 1.85516    |
| CYBA      | 0.41216755 |
| CYBB      | 1.2095761  |
| CYFIP1    | 1.3997841  |
| CYGB      | 0.71913576 |
| CYLC2     | 1.5472529  |
| CYLD      | 0.44461012 |
| CYP1B1    | 1.9577646  |
| CYP20A1   | 0.50376177 |
| CYP26B1   | 2.6210928  |
| CYP27B1   | 1.8931456  |
| CYP2C67   | 1.7569497  |
| CYP2D10   | 1.1496377  |

|          |            |
|----------|------------|
| CYP2D26  | 1.6577127  |
| CYP2J5   | 1.1252267  |
| CYP3A11  | 0.42764854 |
| CYP3A13  | 0.6074014  |
| CYP3A16  | 1.1567461  |
| CYP4A12B | 0.64913845 |
| CYP4F15  | 1.9604874  |
| CYP7B1   | 2.461701   |
| CYR61    | 0.90734863 |
| CYTH1    | 0.61292887 |
| CYTH4    | 0.6415992  |
| CYTIP    | 1.999846   |
| CYYR1    | 2.3409956  |
| DAB1     | 0.5772412  |
| DAB2     | 0.71238256 |
| DACT2    | 1.4593956  |
| DAF2     | 0.9524827  |
| DANCR    | 1.0373325  |
| DAPK3    | 0.76553345 |
| DAPP1    | 0.65294075 |
| DAXX     | 1.3089752  |
| DBN1     | 1.5509644  |
| DBX2     | 2.2434204  |
| DCAF13   | 0.50918674 |
| DCBLD1   | 0.7821226  |
| DCN      | 1.0821705  |
| DCPP1    | 1.076649   |
| DCST1    | 1.3545425  |
| DCTD     | 0.5019989  |
| DCUN1D3  | 0.7855289  |
| DDAH1    | 1.2783802  |
| DDIT3    | 0.44036865 |
| DDIT4    | 1.1502337  |
| DDO      | 0.5198915  |
| DDR2     | 0.38516998 |
| DDT      | 0.6763177  |
| DDX10    | 0.74027824 |
| DDX18    | 0.56166935 |
| DDX19B   | 0.7861767  |
| DDX21    | 1.1932054  |
| DDX24    | 0.57765675 |
| DDX31    | 0.8508301  |
| DDX3X    | 0.5035815  |
| DDX49    | 0.46014166 |
| DDX51    | 0.4929409  |

|           |            |
|-----------|------------|
| DDX56     | 0.41673326 |
| DDX58     | 1.1034617  |
| DEFA2     | 1.4317117  |
| DEFA3     | 1.1124125  |
| DEFA-PS1  | 0.41543078 |
| DEFA-RS10 | 1.1889391  |
| DEFA-RS12 | 1.642442   |
| DEFA-RS2  | 1.879364   |
| DEFA-RS4  | 1.9576693  |
| DEFA-RS7  | 1.8543649  |
| DEFB1     | 1.4551728  |
| DEFB14    | 2.0575817  |
| DEFB22    | 1.141861   |
| DEFB28    | 0.46968222 |
| DEFB33    | 0.92429066 |
| DEFB36    | 1.6426618  |
| DEFB41    | 1.3082762  |
| DEGS1     | 0.5786276  |
| DEGS2     | 0.8070648  |
| DENND1B   | 0.48397684 |
| DENND2D   | 0.47717762 |
| DENND3    | 0.48757744 |
| DENND5A   | 0.463789   |
| DENR      | 0.69038725 |
| DGAT1     | 0.775332   |
| DGAT2     | 0.8330445  |
| DGKE      | 0.4856298  |
| DGKH      | 1.0191164  |
| DGKK      | 2.6963034  |
| DHODH     | 0.3301406  |
| DHPS      | 0.45102406 |
| DHX30     | 0.33826637 |
| DHX33     | 0.86253643 |
| DHX35     | 0.6901202  |
| DHX40     | 0.7596202  |
| DHX58     | 1.3566475  |
| DIAP2     | 1.1668897  |
| DIEXF     | 0.7426598  |
| DIMT1     | 0.58772135 |
| DIP2A     | 0.6872983  |
| DIP2C     | 0.8370633  |
| DIRAS1    | 1.6999352  |
| DIS3      | 0.5315113  |
| DIXDC1    | 2.2492173  |
| DKK2      | 1.3382149  |



|          |            |
|----------|------------|
| DLC1     | 0.40417862 |
| DLG5     | 0.6651416  |
| DLGAP3   | 1.4608204  |
| DLK1     | 0.99884677 |
| DLL4     | 2.5752678  |
| DMBT1    | 13.069374  |
| DMKN     | 1.0467386  |
| DMRT2    | 1.5887904  |
| DMRTA1   | 1.17151    |
| DMXL2    | 0.9070358  |
| DNAH1    | 0.98952746 |
| DNAH2    | 2.4272394  |
| DNAJB5   | 0.66640997 |
| DNAJB9   | 0.5479932  |
| DNAJC12  | 0.99073935 |
| DNAJC13  | 0.5208068  |
| DNAJC14  | 0.7436495  |
| DNAJC22  | 1.8198576  |
| DNASE1L3 | 0.8925824  |
| DNHD1    | 0.67687416 |
| DNM3OS   | 1.9911344  |
| DNMT3L   | 1.2051635  |
| DNTTIP2  | 0.39186668 |
| DOCK10   | 0.35584688 |
| DOCK4    | 0.8459258  |
| DOCK7    | 1.1053615  |
| DOCK9    | 1.2916584  |
| DPH2     | 0.86198664 |
| DPH5     | 0.62756824 |
| DPH6     | 0.74495935 |
| DPY19L3  | 0.67959785 |
| DPYS     | 0.9881394  |
| DPYSL3   | 0.5226984  |
| DPYSL5   | 0.63227177 |
| DRAM1    | 1.1218309  |
| DRAM2    | 0.66465664 |
| DRAP1    | 0.365417   |
| DRD4     | 2.3959012  |
| DSEL     | 0.5771885  |
| DSG1B    | 1.1134715  |
| DSG2     | 0.7194557  |
| DSG4     | 0.9757204  |
| DSP      | 1.3002715  |
| DST      | 1.2459159  |
| DTX1     | 0.67412424 |

|          |            |
|----------|------------|
| DTX2     | 1.5215683  |
| DTX3L    | 0.8885498  |
| DTX4     | 0.47303772 |
| DUPD1    | 1.331847   |
| DUS3L    | 0.59936666 |
| DUS4L    | 0.61509657 |
| DUSP1    | 3.0350256  |
| DUSP12   | 1.2522855  |
| DUSP14   | 0.70446897 |
| DUSP16   | 2.5741959  |
| DUSP2    | 1.7044291  |
| DUSP23   | 0.7081809  |
| DUSP26   | 1.9837017  |
| DUSP4    | 1.3224659  |
| DUSP5    | 1.4924719  |
| DUXBL1   | 1.3133361  |
| DYNC1I1  | 1.347681   |
| DYRK2    | 0.9069729  |
| EAF2     | 1.0526481  |
| EAPP     | 0.40925598 |
| EBI3     | 1.1673627  |
| EBNA1BP2 | 0.7678633  |
| ECE2     | 1.1985536  |
| ECHDC2   | 0.89834046 |
| ECHS1    | 0.36285305 |
| ECSCR    | 0.98570204 |
| EDEM2    | 0.5493188  |
| EDN1     | 4.6177106  |
| EDNRA    | 1.1334538  |
| EDNRB    | 0.8620024  |
| EEA1     | 0.8741045  |
| EED      | 0.45116186 |
| EEF1E1   | 0.4081049  |
| EEPD1    | 0.6481843  |
| EFCAB2   | 0.44654274 |
| EFCAB8   | 1.1832855  |
| EFHB     | 0.7947626  |
| EFHD2    | 0.933331   |
| EFNA1    | 0.8041768  |
| EFNA5    | 0.98385835 |
| EFNB2    | 0.3624158  |
| EGF      | 1.469341   |
| EGFBP2   | 6.296693   |
| EGFLAM   | 1.1611195  |
| EGFR     | 2.034159   |

|           |            |
|-----------|------------|
| EGLN2     | 1.339364   |
| EGLN3     | 1.7308121  |
| EGR1      | 1.4225874  |
| EGR2      | 0.75287104 |
| EHD1      | 1.9279065  |
| EHF       | 1.0008414  |
| EHMT1     | 0.8045025  |
| EID2      | 1.1198502  |
| EIF1A     | 1.274322   |
| EIF2AK2   | 0.5350065  |
| EIF2AK4   | 0.6255646  |
| EIF2S1    | 0.35702658 |
| EIF2S3Y   | 1.462949   |
| EIF4A2    | 0.5115404  |
| EIF4EBP1  | 0.54106426 |
| ELAC2     | 0.47771835 |
| ELAVL4    | 0.48691225 |
| ELF3      | 2.0315185  |
| ELL       | 0.38064575 |
| ELMO1     | 0.9285054  |
| ELOVL4    | 3.0620239  |
| ELOVL5    | 0.52794695 |
| ELP5      | 0.3676777  |
| EMB       | 1.1124082  |
| EMC1      | 0.3599701  |
| EMC4      | 0.6575036  |
| EMC6      | 0.54086447 |
| EMCN      | 0.37127018 |
| EML1      | 1.297246   |
| EMR1      | 0.45678568 |
| ENAH      | 0.65090966 |
| ENC1      | 2.1021223  |
| ENDOG     | 0.3005023  |
| ENO2      | 2.2393708  |
| ENPP2     | 1.1760125  |
| ENTPD1    | 0.7664082  |
| ENTPD3    | 2.1269054  |
| EPAS1     | 1.0114999  |
| EPB4.1L4B | 1.139575   |
| EPB4.1L5  | 0.54660845 |
| EPCAM     | 1.5684841  |
| EPHA2     | 0.64326954 |
| EPHA4     | 1.0650833  |
| EPHA5     | 0.43673468 |
| EPHA7     | 2.0375042  |

|         |            |
|---------|------------|
| EPHB2   | 0.57713795 |
| EPHB3   | 0.63840437 |
| EPN2    | 1.067092   |
| EPPK1   | 2.7178235  |
| EPRS    | 1.1531067  |
| EPSTI1  | 0.5546894  |
| EQTN    | 1.7075677  |
| ERAP1   | 0.4587102  |
| ERAS    | 0.9390044  |
| ERBB2IP | 0.40000343 |
| ERCC1   | 0.4766326  |
| ERCC2   | 0.37275696 |
| ERDR1   | 0.5083561  |
| EREG    | 3.4224472  |
| ERGIC1  | 1.0480046  |
| ERICH2  | 1.2390783  |
| ERLIN1  | 0.37034464 |
| ERLIN2  | 0.41198015 |
| ERP27   | 1.3188405  |
| ERP44   | 0.44391203 |
| ERRFI1  | 4.3135705  |
| ESRP1   | 1.444505   |
| ESRP2   | 4.386984   |
| ESRRB   | 0.46876597 |
| ETNK2   | 1.1600811  |
| ETS2    | 1.3256054  |
| ETV3    | 1.5154271  |
| ETV6    | 1.3176885  |
| EVA1B   | 0.813189   |
| EVA1C   | 2.1780539  |
| EXOC1   | 0.46902227 |
| EXOC2   | 0.47409868 |
| EXOC3L4 | 0.55542135 |
| EXOC6B  | 0.7431202  |
| EXTL1   | 0.32877994 |
| EXTL2   | 0.5708399  |
| EYA1    | 0.53562593 |
| F10     | 1.4702606  |
| F11R    | 1.6147571  |
| F12     | 1.2138221  |
| F2      | 1.9110074  |
| F2R     | 0.5312872  |
| F2RL3   | 0.85084605 |
| F3      | 0.98152924 |
| F7      | 0.9847896  |

|          |            |
|----------|------------|
| FABP3    | 1.1780779  |
| FABP4    | 0.6276221  |
| FABP5    | 1.1277604  |
| FAM107A  | 0.31633067 |
| FAM107B  | 0.7793474  |
| FAM114A1 | 1.0094199  |
| FAM115E  | 1.2477546  |
| FAM129B  | 2.5668097  |
| FAM135A  | 0.93464684 |
| FAM136A  | 0.63286877 |
| FAM13C   | 1.4124618  |
| FAM150B  | 2.7984595  |
| FAM154A  | 0.51177216 |
| FAM155A  | 3.2517617  |
| FAM160A1 | 0.7706814  |
| FAM163A  | 1.2765367  |
| FAM163B  | 1.2378492  |
| FAM169B  | 0.35366917 |
| FAM174A  | 0.5674343  |
| FAM181B  | 0.55984306 |
| FAM184B  | 1.0505311  |
| FAM185A  | 0.5318966  |
| FAM187B  | 0.7684002  |
| FAM188A  | 0.83316374 |
| FAM188B  | 0.5576744  |
| FAM19A3  | 0.8032658  |
| FAM203A  | 0.5266309  |
| FAM206A  | 0.6474285  |
| FAM208B  | 0.7617984  |
| FAM20C   | 1.2489457  |
| FAM21    | 0.37636995 |
| FAM219A  | 0.49067545 |
| FAM222B  | 0.4343996  |
| FAM26E   | 1.2845256  |
| FAM26F   | 1.5655456  |
| FAM3C    | 0.70602465 |
| FAM46A   | 0.82935286 |
| FAM46B   | 0.9433334  |
| FAM60A   | 1.131691   |
| FAM71F2  | 2.5933905  |
| FAM73A   | 0.46722746 |
| FAM78B   | 2.6617553  |
| FAM83A   | 0.5830679  |
| FAM83H   | 0.88766646 |
| FAM84B   | 0.84183407 |

|         |            |
|---------|------------|
| FARP1   | 0.6204705  |
| FAS     | 1.6610918  |
| FASL    | 0.5741706  |
| FASTKD1 | 0.7121978  |
| FASTKD2 | 1.3670435  |
| FASTKD3 | 0.6283293  |
| FAT1    | 0.36416817 |
| FBL     | 0.56243324 |
| FBLIM1  | 1.4009681  |
| FBP1    | 1.0029783  |
| FBP2    | 1.2664163  |
| FBXL12  | 0.8662572  |
| FBXL5   | 1.1922932  |
| FBXL7   | 0.8187778  |
| FBXO17  | 0.8318949  |
| FBXO22  | 0.5447326  |
| FBXO4   | 0.8053932  |
| FBXO43  | 1.3654306  |
| FBXO6   | 0.5968585  |
| FBXW13  | 1.6411114  |
| FBXW18  | 1.373178   |
| FCER1G  | 0.86610985 |
| FCGR2B  | 0.8970938  |
| FCGR4   | 2.0701966  |
| FCHSD2  | 0.42676306 |
| FCRL1   | 1.0960054  |
| FCRL5   | 1.0337644  |
| FDX1    | 0.7889919  |
| FER1L6  | 0.98924136 |
| FERD3L  | 0.8186393  |
| FERMT2  | 0.9281559  |
| FETUB   | 1.4042969  |
| FEZ2    | 0.48746443 |
| FFAR2   | 0.76566076 |
| FGA     | 3.5082033  |
| FGB     | 5.4701514  |
| FGF21   | 1.6749434  |
| FGF7    | 1.4780598  |
| FGFBP3  | 0.4020841  |
| FGFR1   | 0.3340187  |
| FGG     | 6.757786   |
| FGGY    | 0.5597613  |
| FGL1    | 2.3869548  |
| FGL2    | 0.95793486 |
| FHL3    | 0.4333818  |

|         |            |
|---------|------------|
| FILIP1L | 0.5672064  |
| FITM2   | 0.37710667 |
| FKBP14  | 0.56484866 |
| FKBP5   | 2.0053754  |
| FLNB    | 1.6500988  |
| FLOT1   | 0.6653094  |
| FLRT3   | 1.1276848  |
| FLT3    | 0.9881029  |
| FLT4    | 0.77403903 |
| FMO1    | 0.9901633  |
| FMO3    | 1.7805576  |
| FMO9    | 0.91892815 |
| FNBP1L  | 0.8940978  |
| FNBP4   | 0.49830246 |
| FNDC3B  | 1.5179267  |
| FNDC7   | 1.3138843  |
| FOLH1   | 3.3014297  |
| FOS     | 3.824273   |
| FOSB    | 1.4070814  |
| FOSL1   | 3.1402082  |
| FOSL2   | 2.3892365  |
| FOXA2   | 1.9790826  |
| FOXA3   | 2.1375751  |
| FOXC1   | 1.757549   |
| FOXC2   | 1.6965685  |
| FOXF1   | 1.560463   |
| FOXI3   | 1.0867698  |
| FOXK1   | 0.55549955 |
| FOXN2   | 0.50827265 |
| FOXP1   | 0.56917953 |
| FOXP3   | 1.1868682  |
| FOXRED2 | 0.694191   |
| FPR1    | 1.57799    |
| FPR2    | 2.2657938  |
| FPR-RS6 | 2.0645394  |
| FRMD5   | 0.7324214  |
| FRZB    | 0.7167764  |
| FSCN1   | 2.8714657  |
| FSCN2   | 1.0268381  |
| FST     | 2.4858086  |
| FSTL1   | 1.1350503  |
| FSTL3   | 0.47012472 |
| FURIN   | 0.4089594  |
| FUT1    | 1.8287225  |
| FUT2    | 2.882225   |

|         |            |
|---------|------------|
| FXD3    | 1.2353501  |
| FYB     | 0.66055393 |
| FYN     | 0.7927189  |
| FYTD1   | 1.2779558  |
| FZD1    | 1.0162339  |
| FZD3    | 0.88710046 |
| FZD4    | 1.4966092  |
| FZD7    | 0.7066221  |
| FZD9    | 1.8741398  |
| G0S2    | 0.86960125 |
| GAA     | 0.7240486  |
| GAB2    | 0.6153219  |
| GABRP   | 1.5725343  |
| GABRR2  | 0.82071924 |
| GADD45B | 2.3206186  |
| GADD45G | 1.6221538  |
| GAK     | 0.3910179  |
| GALK1   | 0.8176198  |
| GALNT15 | 1.0245099  |
| GALNT18 | 0.9278469  |
| GALNT4  | 0.33763456 |
| GAPDHS  | 0.52292347 |
| GAREML  | 0.8924844  |
| GARS    | 0.8832693  |
| GAS7    | 1.6904373  |
| GAS8    | 0.6061964  |
| GATA2   | 0.4581952  |
| GATA4   | 0.93443584 |
| GATSL2  | 0.9025364  |
| GBE1    | 0.92195606 |
| GBP10   | 1.3849039  |
| GBP2    | 1.6968875  |
| GBP3    | 1.4084315  |
| GBP4    | 2.2549949  |
| GBP5    | 2.7128348  |
| GBP6    | 1.6785626  |
| GBP9    | 1.3822794  |
| GC      | 3.07104    |
| GCA     | 1.49013    |
| GCG     | 2.859325   |
| GCK     | 1.5489299  |
| GCNT2   | 0.6729183  |
| GCNT7   | 0.87973595 |
| GCSH    | 0.622921   |
| GDAP10  | 2.2485042  |



|          |            |
|----------|------------|
| GDAP2    | 0.4236927  |
| GDAP5    | 1.4191911  |
| GDF15    | 1.9443045  |
| GDNF     | 0.96985364 |
| GEM      | 2.7299523  |
| GEMIN5   | 0.38575935 |
| GFOD1    | 1.3047986  |
| GFPT1    | 0.77098465 |
| GFPT2    | 1.2778909  |
| GFRA3    | 1.0426044  |
| GFRA4    | 0.49658918 |
| GGCT     | 0.71323776 |
| GGH      | 0.9326701  |
| GGT1     | 2.9201682  |
| GGT6     | 1.7156162  |
| GGTA1    | 0.5908785  |
| GHITM    | 0.38584995 |
| GIMAP1   | 0.7715044  |
| GIMAP1OS | 1.2983878  |
| GIMAP3   | 1.2158384  |
| GIMAP4   | 0.84839773 |
| GIMAP5   | 1.548738   |
| GIMAP6   | 1.0555639  |
| GIMAP8   | 1.0803542  |
| GIMAP9   | 0.565979   |
| GIPC3    | 1.3296659  |
| GIPR     | 0.93414974 |
| GIT1     | 0.45282412 |
| GJA10    | 1.3742836  |
| GJA4     | 1.676652   |
| GJB1     | 1.3997741  |
| GJB2     | 3.2158442  |
| GJB4     | 0.7253442  |
| GLI1     | 0.78261185 |
| GLIPR2   | 1.049458   |
| GLS      | 0.6804104  |
| GLS2     | 1.0812941  |
| GLT1D1   | 0.5636623  |
| GLT28D2  | 1.0889208  |
| GLYATL3  | 0.7978339  |
| GM10015  | 0.37429237 |
| GM10021  | 1.2749743  |
| GM10069  | 0.67078614 |
| GM10099  | 2.0157652  |
| GM101    | 1.2300122  |

|         |            |
|---------|------------|
| GM10113 | 0.6464188  |
| GM10190 | 0.9881582  |
| GM10277 | 0.89741135 |
| GM10278 | 0.97081375 |
| GM10334 | 12.374493  |
| GM10353 | 0.54945755 |
| GM10385 | 1.5370984  |
| GM10387 | 2.1415384  |
| GM10388 | 1.8234904  |
| GM10403 | 1.3077002  |
| GM10405 | 0.59044456 |
| GM10406 | 1.2028599  |
| GM10421 | 1.3765569  |
| GM10445 | 1.5232685  |
| GM10461 | 0.700428   |
| GM10510 | 0.4864893  |
| GM10537 | 1.1826899  |
| GM10589 | 1.045362   |
| GM10631 | 0.5493512  |
| GM10632 | 0.43350267 |
| GM10634 | 1.6826997  |
| GM10640 | 0.82332087 |
| GM10693 | 0.56354475 |
| GM10696 | 2.1671772  |
| GM10732 | 1.8974133  |
| GM10773 | 1.6675999  |
| GM10781 | 0.94222593 |
| GM10791 | 1.8538527  |
| GM10815 | 1.1001604  |
| GM10832 | 1.8506494  |
| GM10836 | 0.78247595 |
| GM10839 | 5.0635614  |
| GM10845 | 0.50239277 |
| GM10847 | 0.55286    |
| GM10851 | 2.274777   |
| GM10864 | 0.9972553  |
| GM10867 | 0.7962816  |
| GM10914 | 0.6469908  |
| GM11381 | 1.3707416  |
| GM11492 | 0.8706653  |
| GM11517 | 2.0720975  |
| GM11974 | 1.651628   |
| GM11992 | 2.521618   |
| GM12060 | 0.42793655 |
| GM12216 | 0.66605425 |

|         |            |
|---------|------------|
| GM12250 | 1.1145544  |
| GM12253 | 0.8145876  |
| GM12302 | 0.806371   |
| GM12689 | 0.83772445 |
| GM12693 | 0.69640684 |
| GM12703 | 0.6370678  |
| GM12758 | 0.5191057  |
| GM12789 | 0.99936247 |
| GM13011 | 11.459326  |
| GM13152 | 0.5466163  |
| GM13205 | 1.453573   |
| GM13212 | 0.37098074 |
| GM13238 | 0.6407976  |
| GM13262 | 0.78300667 |
| GM13298 | 1.718945   |
| GM13315 | 1.1177068  |
| GM13498 | 0.7751274  |
| GM13546 | 1.8057115  |
| GM136   | 0.7434664  |
| GM13629 | 0.8937397  |
| GM13889 | 3.482782   |
| GM14005 | 1.4566288  |
| GM14321 | 1.0900416  |
| GM14347 | 0.5748346  |
| GM14374 | 1.2626941  |
| GM14499 | 1.26423    |
| GM14548 | 0.5808263  |
| GM14858 | 0.4220233  |
| GM15056 | 4.579143   |
| GM15340 | 1.5888638  |
| GM15498 | 1.2789571  |
| GM15520 | 1.1508477  |
| GM15762 | 1.5002437  |
| GM16223 | 0.76722693 |
| GM16287 | 1.3534591  |
| GM16340 | 0.79455614 |
| GM16486 | 1.8424978  |
| GM16498 | 1.5943115  |
| GM16525 | 1.1900115  |
| GM17769 | 0.7032857  |
| GM19402 | 1.9597445  |
| GM1966  | 0.55428505 |
| GM2022  | 0.89792633 |
| GM2030  | 0.4499681  |
| GM20558 | 2.6652586  |

|         |            |
|---------|------------|
| GM20754 | 0.80900836 |
| GM20758 | 0.87854505 |
| GM2090  | 1.1194444  |
| GM2164  | 1.1525755  |
| GM21944 | 4.6328897  |
| GM21951 | 0.7999041  |
| GM22    | 0.51091194 |
| GM2511  | 1.4264929  |
| GM2545  | 1.2841136  |
| GM2696  | 0.5847268  |
| GM2814  | 1.2034576  |
| GM2837  | 0.8529341  |
| GM2927  | 1.011095   |
| GM3052  | 1.1105351  |
| GM3099  | 0.8939278  |
| GM3161  | 0.98006725 |
| GM3239  | 1.557733   |
| GM3252  | 1.0941195  |
| GM3317  | 0.85753155 |
| GM3367  | 3.5873058  |
| GM3383  | 1.217711   |
| GM3453  | 1.217948   |
| GM3455  | 0.5765526  |
| GM355   | 0.893909   |
| GM3696  | 2.1969016  |
| GM3740  | 0.9730923  |
| GM3764  | 0.7415049  |
| GM382   | 0.44408703 |
| GM3881  | 1.3792777  |
| GM3893  | 2.1006064  |
| GM3985  | 1.258681   |
| GM4107  | 0.6621709  |
| GM4146  | 1.212935   |
| GM4203  | 1.70677    |
| GM4319  | 1.0148692  |
| GM4371  | 1.0990696  |
| GM4402  | 0.7330384  |
| GM4419  | 0.33873892 |
| GM4432  | 2.2633631  |
| GM4461  | 0.5939162  |
| GM4466  | 1.3482819  |
| GM4559  | 0.5856459  |
| GM4755  | 0.8199134  |
| GM4776  | 1.2022326  |
| GM4788  | 1.6738667  |

|        |            |
|--------|------------|
| GM4791 | 1.0466223  |
| GM4841 | 1.1466966  |
| GM4862 | 1.3735671  |
| GM4868 | 0.7275467  |
| GM4907 | 0.8001838  |
| GM4951 | 1.6298885  |
| GM4983 | 1.0897613  |
| GM4994 | 2.1881256  |
| GM5067 | 6.386801   |
| GM5069 | 0.58238935 |
| GM5122 | 1.196775   |
| GM5124 | 0.5677588  |
| GM5129 | 1.1752799  |
| GM5150 | 0.513175   |
| GM5168 | 0.70771337 |
| GM527  | 0.47340012 |
| GM5409 | 10.729021  |
| GM5416 | 1.8321238  |
| GM5420 | 1.3237753  |
| GM5431 | 0.8757341  |
| GM5441 | 0.4701755  |
| GM5458 | 1.303298   |
| GM5476 | 1.2586184  |
| GM5483 | 2.724154   |
| GM5486 | 0.7041905  |
| GM553  | 1.3043056  |
| GM5533 | 0.30167818 |
| GM5549 | 0.93016195 |
| GM5602 | 0.8343196  |
| GM5771 | 13.04335   |
| GM5795 | 1.1808007  |
| GM5796 | 0.80710816 |
| GM5797 | 0.9823413  |
| GM5862 | 0.7491152  |
| GM590  | 1.9546316  |
| GM5908 | 0.8332653  |
| GM5932 | 0.86072755 |
| GM597  | 1.5391693  |
| GM614  | 1.2738585  |
| GM6145 | 1.350555   |
| GM6211 | 0.6227231  |
| GM6252 | 0.825696   |
| GM626  | 0.61516476 |
| GM6280 | 0.4212048  |
| GM6360 | 1.1385345  |

|        |            |
|--------|------------|
| GM6370 | 0.9005816  |
| GM6377 | 2.4788551  |
| GM6402 | 0.87933016 |
| GM6403 | 3.1398408  |
| GM6460 | 1.0133755  |
| GM6498 | 0.6367302  |
| GM6524 | 0.39192486 |
| GM6537 | 0.80433536 |
| GM6579 | 0.79963255 |
| GM6583 | 0.7662811  |
| GM6602 | 1.681962   |
| GM6658 | 0.8186023  |
| GM6744 | 1.2587638  |
| GM6756 | 0.9134064  |
| GM6818 | 1.4816253  |
| GM6846 | 2.072617   |
| GM6904 | 1.2672575  |
| GM6927 | 1.4137833  |
| GM6943 | 0.97592926 |
| GM6981 | 0.4471779  |
| GM7133 | 1.5478683  |
| GM7134 | 1.3919556  |
| GM7157 | 1.0451496  |
| GM7160 | 1.3965459  |
| GM7609 | 0.607636   |
| GM7694 | 0.86139894 |
| GM7827 | 0.73307514 |
| GM7967 | 0.4645934  |
| GM8075 | 1.6911187  |
| GM8096 | 1.0482163  |
| GM8350 | 0.7180886  |
| GM8369 | 0.8803563  |
| GM8672 | 0.9387772  |
| GM8709 | 0.46574163 |
| GM8884 | 2.0351477  |
| GM8909 | 1.2737536  |
| GM8995 | 1.061655   |
| GM9199 | 0.52417254 |
| GM9258 | 0.486053   |
| GM9693 | 0.96079826 |
| GM9706 | 1.4999223  |
| GM9757 | 0.73328686 |
| GM9777 | 0.93995786 |
| GM9802 | 1.0705543  |
| GM9860 | 1.5735917  |

|            |            |
|------------|------------|
| GM9866     | 1.19028    |
| GM9873     | 0.8223264  |
| GM9910     | 0.83937216 |
| GM9917     | 0.54890394 |
| GM9948     | 1.062067   |
| GM9973     | 1.3890088  |
| GMDS       | 0.6253214  |
| GMPPB      | 0.40861416 |
| GNA13      | 1.0926442  |
| GNA11      | 1.7393711  |
| GNAI3      | 0.30567265 |
| GNAL       | 1.5021529  |
| GNAT2      | 0.49702168 |
| GNB1       | 0.3838892  |
| GNB4       | 0.3984499  |
| GNG12      | 1.8649702  |
| GNG5       | 0.55924225 |
| GNGT1      | 0.91595125 |
| GNL1       | 0.94753885 |
| GNL3       | 0.54084873 |
| GNMT       | 1.5448749  |
| GNPNAT1    | 0.99935627 |
| GNRHR      | 0.84485793 |
| GNS        | 1.3454599  |
| GOLGA3     | 0.47124767 |
| GOLGA5     | 0.54935503 |
| GOLGB1     | 0.5140691  |
| GOLT1A     | 0.65908265 |
| GOPC       | 0.7717366  |
| GOT1       | 1.4673653  |
| GP2        | 10.148325  |
| GP49A      | 1.7968245  |
| GPAT2      | 0.5530503  |
| GPD2       | 0.7546153  |
| GPHN       | 1.2228403  |
| GPM6B      | 1.3902674  |
| GPR110     | 1.516999   |
| GPR113     | 1.2904408  |
| GPR115     | 1.3114462  |
| GPR116     | 1.5439787  |
| GPR123     | 0.9901631  |
| GPR126     | 1.7252259  |
| GPR132     | 1.4432421  |
| GPR137B    | 1.0633602  |
| GPR137B-PS | 1.0802622  |

|         |            |
|---------|------------|
| GPR15   | 1.3367102  |
| GPR150  | 0.948241   |
| GPR158  | 0.73783064 |
| GPR161  | 1.1121426  |
| GPR171  | 1.8994584  |
| GPR176  | 1.1664486  |
| GPR179  | 2.4819763  |
| GPR18   | 1.5681701  |
| GPR183  | 1.0758638  |
| GPR26   | 0.67358804 |
| GPR31B  | 2.5268366  |
| GPR33   | 1.1116791  |
| GPR35   | 0.71314335 |
| GPR4    | 0.73641753 |
| GPR55   | 2.0847943  |
| GPR63   | 1.1342816  |
| GPR64   | 2.3982837  |
| GPR65   | 1.1821575  |
| GPR75   | 1.2273393  |
| GPR84   | 2.4197607  |
| GPR85   | 5.2755046  |
| GPRC5B  | 1.4336548  |
| GPRIN1  | 0.48689055 |
| GPT2    | 1.6551104  |
| GPX3    | 1.7755198  |
| GRAMD1A | 0.39515257 |
| GRAMD1B | 0.58582354 |
| GRAMD3  | 2.079832   |
| GRAMD4  | 0.5106039  |
| GRB2    | 0.57078505 |
| GRB7    | 1.8144662  |
| GREB1L  | 1.3199167  |
| GREM2   | 0.56259155 |
| GRHL1   | 1.0654368  |
| GRHL2   | 1.8953736  |
| GRIN2C  | 1.2460747  |
| GRK5    | 0.37365007 |
| GRM6    | 1.4315817  |
| GRN     | 0.7395339  |
| GRPR    | 2.1360102  |
| GRWD1   | 0.7913995  |
| GSAP    | 0.43040466 |
| GSDMA3  | 0.97113514 |
| GSDMC4  | 2.234172   |
| GSDMD   | 0.5230546  |



|         |            |
|---------|------------|
| GSPT2   | 0.75646424 |
| GSR     | 0.7476878  |
| GSTO1   | 0.3628049  |
| GSTO2   | 1.0121384  |
| GSTT3   | 0.5189481  |
| GTF2E1  | 0.5065303  |
| GTPBP10 | 0.40048933 |
| GTPBP6  | 0.5417571  |
| GUCY1B2 | 0.70291924 |
| GUCY2F  | 1.6489131  |
| GXYLT2  | 0.5917144  |
| GYK     | 0.87709284 |
| GYLTL1B | 0.49842358 |
| GYS1    | 0.52698135 |
| GZF1    | 0.53131914 |
| GZMB    | 2.4133034  |
| GZMC    | 2.687831   |
| GZME    | 1.7682388  |
| H13     | 0.5032916  |
| H2AFY2  | 0.42839813 |
| H2AFY3  | 0.62874174 |
| H2-Q10  | 0.7278929  |
| H2-T3   | 0.55262494 |
| H60A    | 1.8971076  |
| H60B    | 1.7700868  |
| H6PD    | 0.63878155 |
| HABP2   | 4.311308   |
| HAMP    | 4.1350107  |
| HAMP2   | 1.824158   |
| HAS1    | 2.7744286  |
| HAS2    | 1.5224702  |
| HAX1    | 0.61836004 |
| HBEGF   | 2.262313   |
| HC      | 1.4255233  |
| HCAR2   | 0.8779421  |
| HCK     | 1.205471   |
| HCLS1   | 1.152381   |
| HCN2    | 0.8993573  |
| HCN3    | 1.463331   |
| HCRT    | 1.1011717  |
| HDAC9   | 1.0563159  |
| HDC     | 1.2204375  |
| HDGFRP3 | 0.8621321  |
| HEATR1  | 1.0508308  |
| HECA    | 0.4104824  |

|          |            |
|----------|------------|
| HECW1    | 0.5391965  |
| HECW2    | 0.7292676  |
| HEG1     | 1.6285226  |
| HELZ2    | 1.396668   |
| HENMT1   | 1.1432726  |
| HEPACAM  | 0.822896   |
| HERC3    | 0.8072381  |
| HERC6    | 0.93270826 |
| HERPUD1  | 0.576561   |
| HES7     | 0.32206535 |
| HGSNAT   | 0.40004587 |
| HHAT     | 0.57342863 |
| HIBADH   | 0.407094   |
| HIC1     | 0.9717469  |
| HID1     | 0.50322294 |
| HIF1A    | 2.230392   |
| HIGD1C   | 1.4727461  |
| HILPDA   | 3.7239199  |
| HILS1    | 0.92902255 |
| HIST1H4M | 0.34116936 |
| HIVEP1   | 0.55306864 |
| HIVEP2   | 0.9815731  |
| HK2      | 2.0243134  |
| HKDC1    | 3.4509513  |
| HMGA1    | 0.5386925  |
| HMGN3    | 0.8865504  |
| HMGXB3   | 0.4745574  |
| HMX1     | 1.2664044  |
| HNF1A    | 2.0659552  |
| HNF4A    | 1.3395717  |
| HNRNPDL  | 1.2425275  |
| HOMEZ    | 0.4739399  |
| HOOK2    | 0.95091677 |
| HORMAD2  | 0.965677   |
| HOXA3    | 0.98775387 |
| HOXA5    | 1.9966276  |
| HOXA9    | 0.5531807  |
| HOXB2    | 0.71145034 |
| HOXB4    | 0.4690094  |
| HOXB7    | 0.37216926 |
| HOXC11   | 1.2481241  |
| HP       | 1.3293743  |
| HPDL     | 1.524895   |
| HPGDS    | 1.8590426  |
| HPX      | 5.33873    |

|          |            |
|----------|------------|
| HRCT1    | 1.11677    |
| HRH1     | 0.8564997  |
| HS3ST1   | 0.97139144 |
| HS3ST2   | 0.8535638  |
| HSBP1    | 0.86236    |
| HSD17B13 | 2.892547   |
| HSD17B2  | 1.2883995  |
| HSF2     | 0.77904606 |
| HSH2D    | 0.50308275 |
| HSP90AB1 | 0.480062   |
| HSPA13   | 0.7318959  |
| HSPA1A   | 3.155923   |
| HSPA4    | 0.73359823 |
| HSPA9    | 0.83525467 |
| HSPB1    | 2.692803   |
| HSPB7    | 2.1603258  |
| HSPB8    | 1.7113938  |
| HSPE1    | 0.8938842  |
| HTR1B    | 2.4628897  |
| HTR1F    | 1.1160576  |
| HTR3A    | 1.0932751  |
| HTR6     | 0.9020481  |
| HTR7     | 3.1991062  |
| HTRA1    | 1.8472009  |
| HTRA4    | 4.91704    |
| HTT      | 0.60341454 |
| HYI      | 0.612669   |
| IAPP     | 2.916943   |
| IARS     | 0.4764967  |
| ICAM1    | 1.8541679  |
| ICOS     | 0.9107733  |
| ID2      | 1.3256035  |
| IDO2     | 3.3706443  |
| IER3     | 4.3388844  |
| IER5L    | 0.83817434 |
| IFI202B  | 1.7391992  |
| IFI204   | 1.5746942  |
| IFI35    | 0.6814585  |
| IFI47    | 1.6458483  |
| IFIH1    | 1.2864256  |
| IFIT1    | 1.4496231  |
| IFIT2    | 1.2524767  |
| IFIT3    | 1.5140676  |
| IFITM1   | 1.8935485  |
| IFITM2   | 1.1798205  |

|           |            |
|-----------|------------|
| IFITM3    | 0.9584813  |
| IFITM5    | 1.9908531  |
| IFITM6    | 0.4690795  |
| IFITM7    | 0.42921305 |
| IFLTD1    | 1.3727112  |
| IFNA13    | 0.8074031  |
| IFNAB     | 0.87327576 |
| IFNB1     | 3.2991629  |
| IFNG      | 4.009959   |
| IFNGR2    | 0.6087408  |
| IFRD1     | 1.697937   |
| IFT122    | 0.42746544 |
| IFT43     | 0.7465086  |
| IFT88     | 0.8255844  |
| IGBP1B    | 1.1421735  |
| IGF2BP2   | 0.7005234  |
| IGFBP1    | 6.427035   |
| IGFBP7    | 0.89832354 |
| IGH-VJ558 | 0.51978254 |
| IGJ       | 0.5541682  |
| IGKV4-55  | 1.5600166  |
| IGSF11    | 1.2580156  |
| IGSF23    | 2.5721772  |
| IGSF5     | 2.5396228  |
| IGSF6     | 1.13131    |
| IGSF8     | 0.93131065 |
| IGSF9     | 0.4949727  |
| IGTP      | 0.6541014  |
| IIGP1     | 1.5848422  |
| IKBKAP    | 0.5762043  |
| IKBKE     | 2.0756903  |
| IKZF4     | 1.5022497  |
| IL10      | 4.818664   |
| IL11      | 1.1510792  |
| IL12B     | 4.1975393  |
| IL12RB1   | 1.1471801  |
| IL12RB2   | 0.814132   |
| IL15      | 0.4632604  |
| IL15RA    | 1.4526     |
| IL17A     | 5.5665903  |
| IL17F     | 2.8095384  |
| IL17RB    | 0.8611431  |
| IL17RC    | 0.67410517 |
| IL18      | 2.2746024  |
| IL18BP    | 1.062469   |

|         |            |
|---------|------------|
| IL19    | 2.0018456  |
| IL1A    | 3.7713513  |
| IL1B    | 2.7510228  |
| IL1F6   | 2.4698527  |
| IL1F9   | 2.6832747  |
| IL1R1   | 1.0408502  |
| IL1R2   | 4.3295417  |
| IL1RN   | 4.766743   |
| IL2     | 1.5557206  |
| IL21R   | 1.1100049  |
| IL22    | 4.4433956  |
| IL23A   | 2.4010181  |
| IL23R   | 2.523496   |
| IL27    | 1.543437   |
| IL2RA   | 3.4102883  |
| IL2RB   | 0.6914215  |
| IL2RG   | 0.9468956  |
| IL33    | 1.9088702  |
| IL4I1   | 1.3880053  |
| IL4RA   | 0.96510315 |
| IL6     | 8.340477   |
| IL7R    | 1.56179    |
| ILD1R1  | 1.2502697  |
| IMMP2L  | 0.49897647 |
| IMP4    | 0.5684757  |
| IMPDH1  | 1.3769374  |
| INADL   | 1.2359953  |
| INHBA   | 0.73502016 |
| INHBB   | 4.4229445  |
| INS1    | 3.61729    |
| INS2    | 1.37396    |
| INSIG2  | 0.33561325 |
| INSL6   | 1.2054315  |
| INSR    | 0.9182136  |
| IPO4    | 0.9584632  |
| IPPK    | 0.44065523 |
| IQCF1   | 0.5159414  |
| IQCF3   | 0.99037385 |
| IQGAP1  | 0.35570478 |
| IRAK3   | 2.3977914  |
| IRF1    | 0.9047971  |
| IRF2BP2 | 0.52545595 |
| IRF4    | 1.0648947  |
| IRF7    | 1.2473731  |
| IRG1    | 4.658892   |

|         |            |
|---------|------------|
| IRGM1   | 0.7555556  |
| IRX3    | 1.7792025  |
| ISG15   | 1.1900373  |
| ISG20L2 | 0.43782187 |
| ISL2    | 1.0827746  |
| ISM2    | 1.5079432  |
| ISY1    | 0.38033724 |
| ISYNA1  | 0.30644083 |
| ITGA1   | 0.9072714  |
| ITGA5   | 1.221149   |
| ITGA7   | 1.5052176  |
| ITGA9   | 1.0920768  |
| ITGAL   | 1.0471053  |
| ITGAM   | 0.48736334 |
| ITGAV   | 1.1375875  |
| ITGB4   | 1.1001859  |
| ITIH3   | 1.2081795  |
| ITIH4   | 6.171816   |
| ITK     | 1.5664563  |
| ITLN1   | 0.9219165  |
| ITLNB   | 0.45955443 |
| ITPKC   | 1.3104424  |
| ITPR3   | 0.46591663 |
| ITPRIP  | 0.94517136 |
| IWS1    | 0.9188287  |
| JADE2   | 1.0862741  |
| JAK1    | 0.49408388 |
| JAK3    | 0.95639944 |
| JAKMIP3 | 0.48259902 |
| JAM2    | 1.1743274  |
| JDP2    | 1.3760042  |
| JUN     | 2.1858373  |
| JUNB    | 1.6592565  |
| KANK1   | 1.219728   |
| KANSL3  | 0.53651094 |
| KATNAL2 | 1.1275868  |
| KBTBD11 | 0.71567106 |
| KCNA4   | 0.7430301  |
| KCNA6   | 0.4937694  |
| KCNC3   | 1.1466272  |
| KCNE3   | 1.3104143  |
| KCNE4   | 3.2377505  |
| KCNF1   | 0.56790066 |
| KCNH7   | 0.8923807  |
| KCNJ15  | 1.2432754  |

|         |            |
|---------|------------|
| KCNJ8   | 1.5990858  |
| KCNK1   | 3.4272122  |
| KCNK15  | 0.6292093  |
| KCNMB3  | 1.9655299  |
| KCNQ1   | 1.8843288  |
| KCNQ5   | 1.1287773  |
| KCNT1   | 0.6898861  |
| KCNT2   | 0.7483673  |
| KCTD12  | 1.1413941  |
| KCTD18  | 1.0263855  |
| KCTD19  | 0.74200296 |
| KDELR3  | 0.8128829  |
| KDF1    | 2.6797645  |
| KDM6B   | 1.413105   |
| KDSR    | 0.6358609  |
| KHNYN   | 0.42004395 |
| KHSRP   | 0.36546707 |
| KIF1A   | 2.4711006  |
| KIF1B   | 1.1299787  |
| KIF27   | 0.7886858  |
| KIF2B   | 1.3690419  |
| KIRREL2 | 0.8572097  |
| KISS1   | 0.77696776 |
| KIZ     | 0.47178555 |
| KLC2    | 0.79502535 |
| KLC3    | 0.45429873 |
| KLF15   | 1.5692718  |
| KLF6    | 1.2076674  |
| KLF7    | 0.6705036  |
| KLF9    | 1.3196507  |
| KLHDC4  | 0.7861943  |
| KLHL15  | 1.0725269  |
| KLHL2   | 1.2863703  |
| KLHL21  | 0.6948924  |
| KLHL31  | 0.99307394 |
| KLHL6   | 0.34236145 |
| KLK1    | 5.973609   |
| KLK12   | 0.7939272  |
| KLK1B11 | 6.1765513  |
| KLK1B21 | 1.9372005  |
| KLK1B22 | 4.144648   |
| KLK1B24 | 4.925167   |
| KLK1B26 | 6.1779833  |
| KLK1B27 | 1.2101221  |
| KLK1B3  | 5.452294   |

|           |            |
|-----------|------------|
| KLK1B4    | 5.8837113  |
| KLK1B5    | 6.4224553  |
| KLK1B7-PS | 0.8059833  |
| KLK1B8    | 5.3756638  |
| KLK5      | 0.82584095 |
| KLK7      | 0.959635   |
| KLK9      | 0.45755816 |
| KLRA2     | 2.3170137  |
| KLRB1-PS1 | 1.0793309  |
| KLRC2     | 1.3468463  |
| KLRI2     | 1.2147751  |
| KNG1      | 4.781083   |
| KNG2      | 3.458492   |
| KPRP      | 1.2658608  |
| KRI1      | 0.6424217  |
| KRR1      | 0.4861455  |
| KRT12     | 1.3847733  |
| KRT13     | 0.58690953 |
| KRT17     | 1.042067   |
| KRT18     | 2.2646737  |
| KRT19     | 0.5140214  |
| KRT2      | 0.6668205  |
| KRT23     | 3.5904102  |
| KRT26     | 2.1894326  |
| KRT31     | 0.8190458  |
| KRT42     | 0.36290264 |
| KRT72     | 1.0674913  |
| KRT74     | 0.5597198  |
| KRT77     | 0.7679632  |
| KRT8      | 2.4890676  |
| KRT85     | 0.77368903 |
| KRTAP11-1 | 2.4606469  |
| KRTAP1-4  | 0.8420868  |
| KRTAP4-16 | 0.42251134 |
| KRTAP9-3  | 0.97274184 |
| KRTCAP2   | 0.53656054 |
| KSR1      | 0.80301213 |
| KTN1      | 1.3503165  |
| L3MBTL1   | 0.94922113 |
| LACC1     | 2.4181705  |
| LAD1      | 2.6446218  |
| LAMA1     | 0.8757317  |
| LAMA4     | 1.1140542  |
| LAMA5     | 1.9131861  |
| LAMB1     | 0.50429535 |



|          |            |
|----------|------------|
| LAMC1    | 0.8236742  |
| LAMC2    | 2.28344    |
| LAMP1    | 0.52737665 |
| LAMP2    | 0.5991001  |
| LANCL3   | 0.8183272  |
| LAO1     | 0.6759794  |
| LAP3     | 0.47559834 |
| LAPTM4A  | 0.71428204 |
| LAPTM4B  | 0.83444977 |
| LARGE    | 1.0127344  |
| LARP1    | 0.8020911  |
| LARP4    | 1.0256252  |
| LARP6    | 0.82596874 |
| LARS     | 0.8702531  |
| LAS1L    | 0.40211916 |
| LATS1    | 0.68239546 |
| LCE1C    | 0.67776823 |
| LCE1M    | 1.6358817  |
| LCN11    | 0.9959047  |
| LCN2     | 1.7487674  |
| LCP1     | 0.38221693 |
| LDHA     | 0.82344437 |
| LDHD     | 2.7786632  |
| LECT2    | 1.0050747  |
| LEF1     | 0.7771144  |
| LEKR1    | 0.3857813  |
| LENG9    | 0.43467808 |
| LEPR     | 0.97858477 |
| LEPRE1   | 0.47561908 |
| LETM1    | 0.39948702 |
| LGALS3BP | 0.89455986 |
| LGALS8   | 1.015872   |
| LGI2     | 1.165112   |
| LGMN     | 0.9211159  |
| LGR4     | 2.212959   |
| LHX1OS   | 0.85769844 |
| LIF      | 3.0903137  |
| LIG3     | 0.6296129  |
| LILRA6   | 0.43505192 |
| LILRB4   | 1.7657337  |
| LIN28B   | 0.60985994 |
| LIN52    | 0.50442123 |
| LIN7C    | 0.85338736 |
| LINS     | 0.52413845 |
| LIPG     | 3.7116213  |

|            |            |
|------------|------------|
| LIPM       | 1.196749   |
| LIPO1      | 0.9948034  |
| LIPT2      | 1.345505   |
| LITAF      | 1.2494512  |
| LIX1L      | 0.9294002  |
| LLGL2      | 0.6718941  |
| LMAN1      | 0.44909573 |
| LMBRD2     | 0.71766067 |
| LMO4       | 0.7540879  |
| LMX1B      | 0.7502425  |
| LNPEP      | 0.9778948  |
| LNX1       | 1.2132838  |
| LOC1008621 | 0.6000838  |
| LOC1010558 | 0.48233604 |
| LOC1010562 | 2.244411   |
| LOC1026322 | 1.0962601  |
| LOC1026331 | 1.279634   |
| LOC1026336 | 0.41357517 |
| LOC1026336 | 1.0977664  |
| LOC1026337 | 0.554008   |
| LOC1026356 | 1.0358956  |
| LOC1026370 | 0.83708525 |
| LOC1026380 | 0.89241743 |
| LOC1026381 | 0.3974843  |
| LOC1026386 | 0.38950253 |
| LOC1026387 | 0.3772905  |
| LOC1026391 | 0.64273643 |
| LOC1026395 | 2.6041846  |
| LOC1026416 | 0.8603351  |
| LOC1026416 | 1.4134421  |
| LOC1026424 | 1.3120575  |
| LOC1026424 | 0.90707254 |
| LOC1026426 | 0.94066286 |
| LOC1026430 | 0.6840246  |
| LOC1026431 | 0.742594   |
| LOC630751  | 1.6630063  |
| LOC675947  | 2.255162   |
| LONRF1     | 0.40397024 |
| LOX        | 5.1016345  |
| LOXL2      | 0.5594034  |
| LPAR1      | 1.4254062  |
| LPCAT2     | 0.5014725  |
| LPCAT2B    | 1.5590665  |
| LPIN3      | 1.3687949  |
| LPP        | 1.0955462  |

|        |            |
|--------|------------|
| LRCH1  | 0.79586744 |
| LRFN3  | 0.5026102  |
| LRG1   | 1.6487327  |
| LRIF1  | 0.69870186 |
| LRIT2  | 0.8347013  |
| LRP10  | 0.3370924  |
| LRP11  | 0.38507032 |
| LRPPRC | 0.41885805 |
| LRR15  | 1.0190995  |
| LRR16A | 0.7715843  |
| LRR25  | 1.5787821  |
| LRR34  | 1.207407   |
| LRR38  | 0.67703605 |
| LRR51  | 0.48934388 |
| LRR58  | 0.6876688  |
| LRR59  | 0.5279064  |
| LRR63  | 1.0064092  |
| LRR66  | 1.2240384  |
| LRR75A | 0.86276674 |
| LRR8A  | 0.590498   |
| LRR8D  | 1.1224599  |
| LRR1   | 0.4356432  |
| LRRTM2 | 1.8828206  |
| LSG1   | 0.4665451  |
| LSR    | 0.6625633  |
| LTV1   | 1.0404816  |
| LUZP1  | 0.37451982 |
| LY6A   | 1.2123637  |
| LY6C1  | 0.57131815 |
| LY6K   | 2.456479   |
| LY75   | 1.1577172  |
| LY86   | 0.6294899  |
| LY96   | 0.9905801  |
| LYN    | 0.7373142  |
| LYPD5  | 1.4307861  |
| LYPLA2 | 0.4515338  |
| LYRM1  | 1.0765569  |
| LYRM7  | 1.5233624  |
| LYSMD2 | 1.0540123  |
| LYVE1  | 5.8772573  |
| LZIC   | 0.48940468 |
| LZTS1  | 0.3533361  |
| M6PR   | 0.38941717 |
| MACC1  | 1.1620202  |
| MAD2L2 | 0.59100866 |

|            |            |
|------------|------------|
| MADCAM1    | 1.0193014  |
| MADD       | 0.5265293  |
| MAFF       | 3.439371   |
| MAG        | 0.78379107 |
| MAGEA3     | 1.1942484  |
| MAGEB17-PS | 1.084713   |
| MAGED1     | 1.4160414  |
| MAGEH1     | 0.83393836 |
| MAGI1      | 0.6158197  |
| MAGOHB     | 0.5895314  |
| MAK16      | 0.3081355  |
| MAL2       | 3.9646535  |
| MALSU1     | 0.6510658  |
| MAMDC2     | 0.49217987 |
| MAN2A1     | 0.8550639  |
| MANEAL     | 1.1210492  |
| MANF       | 0.548337   |
| MANSC1     | 0.71786404 |
| MAOB       | 1.9139633  |
| MAP1B      | 0.6612222  |
| MAP2K1     | 0.71687937 |
| MAP3K14    | 0.4784503  |
| MAP3K6     | 2.1813798  |
| MAP3K8     | 2.7019377  |
| MAP4       | 0.6811037  |
| MAP4K3     | 0.41410208 |
| MAP4K4     | 1.0481977  |
| MAP7D2     | 0.5779896  |
| MAPK12     | 0.9342098  |
| MAPK6      | 0.7714119  |
| MAPK7      | 0.48634005 |
| MAPRE2     | 0.43435    |
| MARCKS     | 1.1890674  |
| MARCKSL1   | 1.7514362  |
| MARCO      | 2.9514918  |
| MARK1      | 1.6784344  |
| MARK4      | 0.7177391  |
| MARVELD3   | 2.1804857  |
| MAS1       | 0.6366708  |
| MASP2      | 1.121773   |
| MAT1A      | 5.8755865  |
| MAT2A      | 0.3305006  |
| MATN1      | 2.3351865  |
| MATN3      | 1.0256371  |
| MB21D2     | 1.9150517  |

|         |            |
|---------|------------|
| MBD1    | 2.8277564  |
| MBNL2   | 0.43717575 |
| MBTD1   | 0.31660128 |
| MBTPS2  | 0.69594383 |
| MCAM    | 0.5967879  |
| MCFD2   | 0.6580992  |
| MCMBP   | 0.40618563 |
| MCTS1   | 0.5526552  |
| MDFIC   | 1.4222264  |
| MDGA1   | 1.0860238  |
| MDN1    | 1.2129555  |
| ME3     | 1.5294824  |
| MEA1    | 0.41056204 |
| MED11   | 0.54827166 |
| MED28   | 0.35313797 |
| MEF2A   | 1.171627   |
| MEFV    | 2.107893   |
| MEGF11  | 0.49297047 |
| MEIG1   | 0.8434849  |
| MEIS2   | 0.33135033 |
| MELK    | 0.48423815 |
| METRNL  | 0.6651306  |
| METTL1  | 0.6354122  |
| METTL16 | 0.522768   |
| METTL22 | 0.38322353 |
| MFSD2A  | 3.0896993  |
| MFSD6L  | 3.6278522  |
| MFSD7A  | 2.1429477  |
| MFSD7B  | 1.3263597  |
| MGARP   | 2.1865458  |
| MGAT4A  | 1.1875181  |
| MGEA5   | 0.39982462 |
| MGRN1   | 0.8533592  |
| MIA     | 1.5297534  |
| MIA2    | 1.04604    |
| MIER2   | 0.8621378  |
| MIF     | 1.3101463  |
| MIF4GD  | 0.9615283  |
| MINA    | 0.7876663  |
| MIPOL1  | 0.610677   |
| MIR17HG | 0.6597214  |
| MITD1   | 0.37617207 |
| MLKL    | 1.1826153  |
| MLLT4   | 1.109206   |
| MLLT6   | 1.5279212  |

|         |            |
|---------|------------|
| MLXIP   | 1.052165   |
| MMD2    | 0.9441309  |
| MMP13   | 3.1294117  |
| MMP14   | 1.9454579  |
| MMP19   | 1.1979218  |
| MMP3    | 7.3080344  |
| MMP7    | 3.1789804  |
| MMP8    | 0.79712296 |
| MMS19   | 0.4508133  |
| MMS22L  | 0.36041117 |
| MNDA    | 1.3365707  |
| MNT     | 0.5022445  |
| MOB4    | 0.7602577  |
| MORC3   | 0.5335598  |
| MORF4L2 | 0.32675362 |
| MORN4   | 0.9684181  |
| MOV10   | 0.75995874 |
| MPEG1   | 0.3914237  |
| MPTX1   | 0.3480718  |
| MPZL2   | 1.778965   |
| MRAP2   | 0.46931744 |
| MRAS    | 1.1315365  |
| MREG    | 2.1904616  |
| MRGPRA6 | 0.73936176 |
| MRGPRB1 | 1.335731   |
| MRGPRX2 | 0.80733395 |
| MROH1   | 0.63706994 |
| MRPL17  | 0.41567087 |
| MRPL3   | 0.8161535  |
| MRPL45  | 1.0287623  |
| MRPS10  | 0.37033844 |
| MRPS18B | 0.6200652  |
| MRPS30  | 0.36178255 |
| MRPS6   | 0.9539981  |
| MRPS9   | 0.33588886 |
| MRRF    | 0.62558794 |
| MRTO4   | 0.35677004 |
| MS4A14  | 0.33374596 |
| MS4A4A  | 3.7384038  |
| MS4A4C  | 0.34437847 |
| MS4A4D  | 0.68955135 |
| MS4A6B  | 1.6896172  |
| MS4A6C  | 1.467103   |
| MS4A6D  | 3.6417885  |
| MS4A8A  | 0.9629574  |

|         |            |
|---------|------------|
| MSH3    | 0.33614063 |
| MSN     | 0.8898454  |
| MSR1    | 2.411994   |
| MSRB1   | 0.54183865 |
| MSTO1   | 0.41979694 |
| MT1     | 2.896864   |
| MT2     | 2.4240966  |
| MT4     | 0.9171829  |
| MTAG2   | 0.940135   |
| MTAP    | 0.86078024 |
| MTFR1L  | 0.5935855  |
| MTFR2   | 0.61286354 |
| MTHFD1L | 0.38231993 |
| MTHFD2L | 1.4216862  |
| MTM1    | 0.8814347  |
| MTMR1   | 0.69081116 |
| MTOR    | 0.41482115 |
| MTPAP   | 0.5101633  |
| MTRR    | 0.990469   |
| MTUS1   | 0.65883064 |
| MTX3    | 0.4943998  |
| MUC2    | 0.8012655  |
| MUC20   | 0.585788   |
| MUL1    | 0.31750584 |
| MUP3    | 0.4373641  |
| MUP6    | 1.0512762  |
| MUSK    | 0.36300135 |
| MVB12A  | 0.52101994 |
| MVP     | 1.4439192  |
| MX1     | 2.1781206  |
| MX2     | 2.0572948  |
| MYBBP1A | 1.1090465  |
| MYBPC2  | 0.74261117 |
| MYBPC3  | 0.36266613 |
| MYC     | 1.5316672  |
| MYCBP2  | 0.47175074 |
| MYCS    | 0.79568434 |
| MYD88   | 0.8962784  |
| MYH4    | 0.95623803 |
| MYH7B   | 1.3718553  |
| MYO10   | 1.4927607  |
| MYO1E   | 0.4805336  |
| MYO1G   | 0.6007085  |
| MYO5C   | 2.059449   |
| MYPN    | 1.4092157  |

|          |            |
|----------|------------|
| MYT1L    | 0.7959895  |
| N4BP1    | 1.0978942  |
| N4BP2L1  | 0.5093193  |
| N4BP2L2  | 0.36394358 |
| NAA20    | 0.52473736 |
| NAA25    | 1.7503748  |
| NAB1     | 0.89957047 |
| NAB2     | 0.3371992  |
| NADK     | 0.89504004 |
| NAF1     | 0.9113097  |
| NAGK     | 0.45608377 |
| NAGPA    | 0.36580753 |
| NAIP1    | 0.7932625  |
| NAIP6    | 0.6825099  |
| NAMPT    | 1.6581678  |
| NANOS2   | 1.192914   |
| NAP1L2   | 1.5032277  |
| NAPSA    | 0.6056938  |
| NAT10    | 0.83201504 |
| NAT3     | 0.8836713  |
| NCAN     | 1.3310657  |
| NCDN     | 0.6953864  |
| NCEH1    | 0.789968   |
| NCF1     | 1.1562815  |
| NCKAP5   | 1.0157571  |
| NCMAP    | 0.8333006  |
| NDEL1    | 0.60882664 |
| NDFIP1   | 0.43745947 |
| NDRG1    | 1.8180842  |
| NDRG2    | 1.2049913  |
| NDRG3    | 0.54468346 |
| NDST1    | 0.40926313 |
| NDUFA4L2 | 1.2516255  |
| NDUF4F4  | 0.7257838  |
| NEB      | 2.5923755  |
| NECAB1   | 0.879323   |
| NEFH     | 0.85609627 |
| NEIL1    | 0.3219266  |
| NEK6     | 1.4355221  |
| NESPAS   | 1.4116127  |
| NETO2    | 0.9046731  |
| NEU1     | 1.071136   |
| NEURL1B  | 0.5043206  |
| NEURL2   | 0.5526295  |
| NEURL3   | 1.1854486  |



|           |            |
|-----------|------------|
| NF1       | 0.7923074  |
| NFATC4    | 0.57289696 |
| NFE2L1    | 0.8059478  |
| NFE2L3    | 0.7247653  |
| NFIL3     | 3.1608481  |
| NFKB1     | 0.8645086  |
| NFKB2     | 1.1387668  |
| NFKBIA    | 1.9806142  |
| NFKBIB    | 0.8955245  |
| NFKBID    | 0.78478384 |
| NFKBIE    | 1.1872511  |
| NFKBIZ    | 2.0981855  |
| NFRKB     | 0.42941523 |
| NGF       | 0.83318853 |
| NHLH1     | 1.8011582  |
| NID1      | 0.7617874  |
| NIF3L1    | 0.4409485  |
| NIFK      | 0.5236559  |
| NINJ1     | 1.0137506  |
| NIP7      | 0.62433577 |
| NIPAL1    | 1.0461583  |
| NIPAL2    | 3.6663823  |
| NIPSNAP1  | 0.819705   |
| NIPSNAP3B | 0.76045704 |
| NISCH     | 0.3692279  |
| NKX1-2    | 0.49324393 |
| NKX6-3    | 0.62461376 |
| NLE1      | 0.6713848  |
| NLGN2     | 0.47891712 |
| NLN       | 0.95961666 |
| NLRC4     | 0.77970314 |
| NLRC5     | 1.3641629  |
| NLRP3     | 1.4417703  |
| NLRP4C    | 0.8224411  |
| NLRP9A    | 1.1535149  |
| NMB       | 2.0994306  |
| NMBR      | 1.0425754  |
| NME1      | 0.46204376 |
| NME2      | 0.8453536  |
| NME5      | 0.5176754  |
| NME8      | 1.1132667  |
| NMI       | 0.6365156  |
| NMNAT2    | 0.9372964  |
| NMRK1     | 0.47249198 |
| NNAT      | 0.41305542 |

|         |            |
|---------|------------|
| NOC2L   | 0.9870906  |
| NOD1    | 0.67342234 |
| NOD2    | 1.1433349  |
| NOL10   | 0.54007673 |
| NOL6    | 0.7062082  |
| NOLC1   | 0.8110056  |
| NOMO1   | 0.4338193  |
| NOP10   | 0.5928383  |
| NOP14   | 0.52339506 |
| NOP16   | 1.1855989  |
| NOP2    | 0.840209   |
| NOP56   | 0.53760624 |
| NOS2    | 2.9753404  |
| NOS3    | 1.4926176  |
| NOTUMOS | 1.7559032  |
| NOX1    | 0.83255243 |
| NOXA1   | 2.3979673  |
| NOXO1   | 0.49908495 |
| NPC1    | 0.4157505  |
| NPDC1   | 0.9192562  |
| NPEPL1  | 0.65699244 |
| NPFF    | 0.5325856  |
| NPFFR1  | 0.9032345  |
| NPHP3   | 0.968127   |
| NPHP4   | 0.5729964  |
| NPM1    | 0.6610527  |
| NPW     | 1.6366134  |
| NPY     | 1.8120508  |
| NPY1R   | 0.82053447 |
| NR1D2   | 0.5405469  |
| NR1H3   | 0.9698963  |
| NR1H4   | 2.892411   |
| NR1H5   | 1.7134748  |
| NR1I2   | 1.3237996  |
| NR4A1   | 2.020092   |
| NR4A3   | 2.8066244  |
| NR5A2   | 2.1460028  |
| NR6A1   | 0.9206691  |
| NRAP    | 0.3675542  |
| NRCAM   | 0.8976834  |
| NRP2    | 1.4807243  |
| NRROS   | 0.72197104 |
| NRXN3   | 0.41388154 |
| NSFL1C  | 0.7635865  |
| NSMAF   | 0.5826063  |

|            |            |
|------------|------------|
| NSUN4      | 1.0585656  |
| NT5DC3     | 1.0859427  |
| NT5E       | 0.80929804 |
| NTMT1      | 0.525537   |
| NTN1       | 1.4367414  |
| NTNG2      | 1.4271281  |
| NTRK2      | 0.47369146 |
| NTS        | 2.7062173  |
| NUAK2      | 0.9736023  |
| NUCB2      | 0.48028374 |
| NUDCD3     | 0.47864962 |
| NUDT12OS   | 1.20785    |
| NUDT17     | 2.3534946  |
| NUFIP1     | 0.39086437 |
| NUMBL      | 0.8301828  |
| NUP205     | 0.88579655 |
| NUP210L    | 0.6684258  |
| NUP37      | 0.37992096 |
| NUP98      | 0.4818282  |
| NUPR1      | 4.745331   |
| NUS1       | 1.0396032  |
| NXN        | 0.40734816 |
| NXPE3      | 0.6799078  |
| OAS1A      | 0.93878937 |
| OAS1F      | 0.8668437  |
| OAS2       | 1.2951517  |
| OASL1      | 2.1621833  |
| OASL2      | 0.88057375 |
| OCLN       | 2.339256   |
| ODF4       | 0.82626176 |
| OGFR       | 0.5596676  |
| OIT1       | 0.44977045 |
| OLA1       | 0.62762785 |
| OLFR1      | 0.54026055 |
| OLFR10     | 0.9740355  |
| OLFR1012   | 0.90108156 |
| OLFR1013   | 0.6738925  |
| OLFR1031   | 1.5090137  |
| OLFR1043   | 0.92969084 |
| OLFR104-PS | 1.4393394  |
| OLFR1095   | 0.8123236  |
| OLFR1097   | 0.95419407 |
| OLFR1100   | 1.0394998  |
| OLFR1110   | 1.8648324  |
| OLFR1131   | 0.47350836 |

|          |            |
|----------|------------|
| OLFR1135 | 1.6441629  |
| OLFR1138 | 1.1808317  |
| OLFR1141 | 1.205193   |
| OLFR1152 | 1.0827212  |
| OLFR1226 | 0.9643812  |
| OLFR1232 | 1.5760512  |
| OLFR1247 | 1.1881986  |
| OLFR1248 | 1.0405571  |
| OLFR1249 | 0.8877044  |
| OLFR1251 | 1.5498369  |
| OLFR1257 | 1.3411179  |
| OLFR1265 | 1.007549   |
| OLFR1284 | 1.2252581  |
| OLFR129  | 1.705523   |
| OLFR1311 | 0.8371742  |
| OLFR1314 | 1.1273015  |
| OLFR132  | 1.332911   |
| OLFR1321 | 0.8292928  |
| OLFR1322 | 1.1686382  |
| OLFR1323 | 1.2040014  |
| OLFR1328 | 1.6299968  |
| OLFR1330 | 1.0475605  |
| OLFR1335 | 0.8538475  |
| OLFR1337 | 1.0374451  |
| OLFR135  | 1.1421294  |
| OLFR1364 | 1.1300254  |
| OLFR1380 | 0.70134616 |
| OLFR1390 | 1.3588662  |
| OLFR1396 | 3.716811   |
| OLFR1410 | 0.69514465 |
| OLFR1417 | 0.42858362 |
| OLFR1418 | 0.68223596 |
| OLFR1423 | 1.487711   |
| OLFR1425 | 0.9019549  |
| OLFR1433 | 1.4207368  |
| OLFR1444 | 2.752479   |
| OLFR1454 | 1.2767236  |
| OLFR146  | 1.2771256  |
| OLFR1461 | 1.3338292  |
| OLFR15   | 2.1912832  |
| OLFR1508 | 1.3354294  |
| OLFR157  | 1.1157014  |
| OLFR160  | 1.0713818  |
| OLFR164  | 1.0505607  |
| OLFR187  | 0.69202566 |

|             |            |
|-------------|------------|
| OLFR190     | 0.47477388 |
| OLFR194     | 0.6216028  |
| OLFR204     | 0.94922924 |
| OLFR213     | 0.7664046  |
| OLFR224     | 1.0715036  |
| OLFR247     | 0.49633026 |
| OLFR273     | 1.5783207  |
| OLFR286     | 0.9578457  |
| OLFR29-PS1  | 1.3363962  |
| OLFR352     | 1.565964   |
| OLFR356     | 0.6917765  |
| OLFR360     | 1.3480289  |
| OLFR368     | 1.2838993  |
| OLFR398     | 1.047749   |
| OLFR402     | 1.055243   |
| OLFR418-PS1 | 0.6507983  |
| OLFR429     | 1.0658541  |
| OLFR434     | 1.271251   |
| OLFR441     | 2.181161   |
| OLFR447     | 0.94815207 |
| OLFR481     | 1.0753465  |
| OLFR491     | 1.0912235  |
| OLFR494     | 1.2553649  |
| OLFR518     | 1.0670769  |
| OLFR52      | 0.7604377  |
| OLFR522     | 0.45390892 |
| OLFR538     | 1.0572073  |
| OLFR543     | 1.400774   |
| OLFR545     | 0.830348   |
| OLFR56      | 1.7713213  |
| OLFR564     | 0.6461661  |
| OLFR568     | 0.8009279  |
| OLFR571     | 0.95455956 |
| OLFR59      | 1.8781295  |
| OLFR60      | 1.1124265  |
| OLFR633     | 0.7148993  |
| OLFR640     | 1.4232323  |
| OLFR642     | 0.9598777  |
| OLFR652     | 1.6449027  |
| OLFR702     | 1.2678015  |
| OLFR705     | 0.8903291  |
| OLFR720     | 1.2672     |
| OLFR730     | 0.77965903 |
| OLFR745     | 0.56770897 |
| OLFR792     | 0.8008084  |

|         |            |
|---------|------------|
| OLFR796 | 0.8781359  |
| OLFR811 | 0.946012   |
| OLFR813 | 1.030076   |
| OLFR823 | 1.1181698  |
| OLFR829 | 1.0263987  |
| OLFR855 | 0.890465   |
| OLFR887 | 0.92704415 |
| OLFR915 | 0.58795786 |
| OLFR921 | 0.77685785 |
| OLFR922 | 0.6586659  |
| OLFR97  | 0.33324242 |
| OLFR975 | 1.3488903  |
| OLFR994 | 1.06038    |
| OLIG2   | 0.53260136 |
| OMG     | 1.0081134  |
| ONECUT1 | 1.2742925  |
| OOEP    | 1.3322942  |
| OPN1MW  | 0.840888   |
| OPRK1   | 0.89274216 |
| ORM1    | 1.5589852  |
| ORM2    | 1.9953856  |
| ORM3    | 1.1531842  |
| OSBPL10 | 0.62036943 |
| OSBPL5  | 0.34673834 |
| OSBPL7  | 0.3439374  |
| OSM     | 0.7072575  |
| OSMR    | 1.9837418  |
| OSTF1   | 0.5625386  |
| OSTN    | 1.3231254  |
| OTOL1   | 1.4065251  |
| OTUD3   | 1.1081586  |
| OTUD6B  | 0.9490719  |
| P2RX4   | 0.82289743 |
| P2RY10  | 1.4546404  |
| P2RY13  | 0.7867975  |
| P2RY14  | 0.5683751  |
| P2RY2   | 2.8449187  |
| P2RY4   | 1.5848875  |
| P4HA2   | 2.3601222  |
| PACRGL  | 0.49437666 |
| PACSIN3 | 1.1917028  |
| PADI6   | 0.9539676  |
| PAH     | 5.1054387  |
| PALLD   | 0.4368     |
| PAM     | 0.7198701  |

|           |            |
|-----------|------------|
| PAM16     | 0.42924595 |
| PANX1     | 0.600729   |
| PAPD4     | 0.50788975 |
| PAPPA     | 2.177381   |
| PAPPA2    | 1.2564888  |
| PAQR3     | 1.5716403  |
| PARD3     | 0.6948259  |
| PARD3BOS1 | 0.9936068  |
| PARD6B    | 0.8479886  |
| PARD6G    | 0.6263828  |
| PARL      | 0.57575226 |
| PARM1     | 0.81046295 |
| PARP10    | 1.0184336  |
| PARP11    | 0.4981277  |
| PARP12    | 1.347817   |
| PARP14    | 1.1129761  |
| PARP4     | 0.45535326 |
| PARVA     | 0.6926451  |
| PATL1     | 0.7894101  |
| PAWR      | 0.80926466 |
| PCBP3     | 0.5111339  |
| PCDH19    | 1.9194727  |
| PCDHB13   | 0.9542141  |
| PCDHB14   | 1.4782963  |
| PCDHB17   | 0.620162   |
| PCDHB21   | 0.63982177 |
| PCDHB22   | 1.2937047  |
| PCDHGA10  | 1.0497596  |
| PCDHGA9   | 0.829134   |
| PCGF6     | 0.532289   |
| PCMTD1    | 0.7896588  |
| PCSK4     | 0.7877884  |
| PCSK5     | 0.6832342  |
| PDCD1     | 1.6317153  |
| PDCD11    | 0.42628622 |
| PDCD1LG2  | 1.7569675  |
| PDCD5     | 0.32901525 |
| PDE1B     | 0.37796164 |
| PDE3A     | 0.5435939  |
| PDE3B     | 1.5174928  |
| PDE4B     | 1.7862859  |
| PDE4D     | 0.5306096  |
| PDE7B     | 1.3168564  |
| PDE8A     | 0.5363612  |
| PDGFA     | 1.0516696  |

|         |            |
|---------|------------|
| PDGFRA  | 0.89512205 |
| PDHA2   | 1.3183885  |
| PDIA2   | 1.6590834  |
| PDIA6   | 0.73323107 |
| PDK1    | 0.62594604 |
| PDK4    | 3.049591   |
| PDLIM5  | 0.4989829  |
| PDPN    | 1.2711465  |
| PDPR    | 0.32402873 |
| PDXK    | 0.87792873 |
| PDXK-PS | 0.8472376  |
| PDYN    | 1.1006534  |
| PEA15B  | 1.3349993  |
| PECAM1  | 0.5841174  |
| PELI1   | 1.0456758  |
| PELI3   | 2.6926358  |
| PER1    | 1.4352493  |
| PERP    | 1.1226912  |
| PET100  | 1.0734944  |
| PEX11A  | 2.2034054  |
| PEX11B  | 0.5582485  |
| PEX5L   | 0.6141803  |
| PFDN4   | 0.65816593 |
| PFKFB3  | 2.9410677  |
| PFKL    | 0.92311573 |
| PFKP    | 0.9529185  |
| PFN2    | 0.8498509  |
| PGAM1   | 1.1794434  |
| PGAM5   | 0.63162804 |
| PGC     | 0.83192587 |
| PGD     | 0.35080242 |
| PGK1    | 0.94997644 |
| PGLYRP3 | 0.4162619  |
| PGLYRP4 | 1.1812241  |
| PGM2    | 1.4826674  |
| PGM3    | 0.8932059  |
| PGS1    | 1.2117372  |
| PHC1    | 0.3970766  |
| PHF11A  | 1.4695477  |
| PHF11B  | 1.1492333  |
| PHF11C  | 1.4338703  |
| PHF11D  | 1.4660583  |
| PHF13   | 0.724998   |
| PHF20   | 0.80240726 |
| PHGDH   | 0.89933395 |



|         |            |
|---------|------------|
| PHIP    | 0.48771763 |
| PHLDA1  | 0.51537657 |
| PHLPP1  | 1.3056169  |
| PHOX2A  | 3.755387   |
| PHYHIPL | 1.5211003  |
| PI15    | 4.4341507  |
| PI4K2A  | 0.6091833  |
| PIAS2   | 0.7232075  |
| PID1    | 1.199461   |
| PIGG    | 0.4474864  |
| PIK3AP1 | 1.3694353  |
| PIK3C2A | 0.71100044 |
| PIK3CG  | 0.6503625  |
| PIK3IP1 | 1.8137751  |
| PIK3R5  | 1.3505158  |
| PIK3R6  | 0.6858926  |
| PIM3    | 1.6493702  |
| PIP5K1A | 2.616199   |
| PIRA2   | 1.0906692  |
| PISD    | 0.49585915 |
| PITPNA  | 0.4433565  |
| PIWIL2  | 0.5406277  |
| PIWIL4  | 1.283      |
| PKD1L2  | 0.5819645  |
| PKD2    | 0.65149164 |
| PKM     | 1.1870952  |
| PKP4    | 0.5339594  |
| PLA1A   | 2.7266946  |
| PLA2G1B | 7.188988   |
| PLA2G4A | 0.7259064  |
| PLA2G4F | 1.8158119  |
| PLA2G7  | 1.6405497  |
| PLAC8   | 0.6741543  |
| PLAGL1  | 0.7775676  |
| PLAT    | 1.8833776  |
| PLBD2   | 0.96661997 |
| PLCB4   | 0.46684456 |
| PLCD1   | 0.85683775 |
| PLCL1   | 0.43397593 |
| PLCXD2  | 1.4705572  |
| PLD1    | 0.37069607 |
| PLD2    | 0.49190426 |
| PLEK    | 0.88423395 |
| PLEKHA1 | 1.7086105  |
| PLEKHB1 | 0.595639   |

|           |            |
|-----------|------------|
| PLEKHB2   | 0.41735888 |
| PLEKHG4   | 3.1131659  |
| PLEKHG6   | 1.2131798  |
| PLEKHH1   | 1.3450077  |
| PLEKHS1   | 3.5034165  |
| PLET1     | 3.9196117  |
| PLG       | 1.7543261  |
| PLIN5     | 1.00154    |
| PLK2      | 2.4335504  |
| PLK3      | 1.0950465  |
| PLOD1     | 0.62709904 |
| PLOD3     | 0.6519437  |
| PLSCR1    | 1.9996581  |
| PLTP      | 0.49268198 |
| PLXNA2    | 0.6099696  |
| PLXND1    | 1.2297225  |
| PMAIP1    | 1.7055926  |
| PMEPA1    | 1.6915817  |
| PML       | 0.33456564 |
| PNLIP     | 11.910057  |
| PNLIPRP1  | 12.272474  |
| PNLIPRP2  | 8.864243   |
| PNO1      | 0.88610125 |
| PNPLA2    | 0.8660855  |
| POGK      | 1.2910726  |
| POGLUT1   | 0.83549595 |
| POLG2     | 0.6774998  |
| POLR1A    | 0.92193556 |
| POLR1B    | 0.91803074 |
| POLR1E    | 0.48014832 |
| POLR2G    | 0.45386076 |
| POLR3D    | 0.7631588  |
| POLR3E    | 0.7147045  |
| POLR3G    | 0.5974293  |
| POM121L12 | 0.8660517  |
| POMP      | 0.5680237  |
| PON1      | 1.1308365  |
| POP4      | 0.9753146  |
| POR       | 0.9684715  |
| POT1A     | 0.525023   |
| POU2AF1   | 0.94159985 |
| POU2F3    | 0.59968734 |
| POU3F2    | 0.8663943  |
| POU5F1    | 1.6910386  |
| POU6F1    | 0.51508904 |

|          |            |
|----------|------------|
| POU6F2   | 0.3698008  |
| PPA1     | 1.2546949  |
| PPAN     | 0.33552027 |
| PPAP2B   | 1.2955084  |
| PPAPDC2  | 0.3953519  |
| PPARD    | 0.49919844 |
| PPARGC1A | 0.5838878  |
| PPARGC1B | 0.43278646 |
| PPM1H    | 1.5675001  |
| PPP1R14B | 0.43252373 |
| PPP1R16B | 0.7685714  |
| PPP1R21  | 0.7570596  |
| PPP1R3B  | 0.6176605  |
| PPP1R3F  | 0.85010195 |
| PPP1R3G  | 3.314858   |
| PPP2CB   | 0.44356966 |
| PPP2R2A  | 0.68584967 |
| PPP3CC   | 0.9734912  |
| PPP4R1   | 0.6755543  |
| PPP5C    | 0.67713785 |
| PPY      | 0.5767069  |
| PRDM1    | 1.7482834  |
| PRDX6    | 0.87670565 |
| PRELID2  | 0.83059454 |
| PREX1    | 0.36130428 |
| PRF1     | 0.6701851  |
| PRH1     | 0.34071708 |
| PRICKLE1 | 0.72429657 |
| PRKAR1A  | 0.6603551  |
| PRKCB    | 0.6048498  |
| PRKCE    | 0.33992052 |
| PRKCH    | 0.61297894 |
| PRKCI    | 0.5507097  |
| PRL2C5   | 1.5727446  |
| PRLH     | 1.4533217  |
| PRLR     | 1.3273633  |
| PRM2     | 1.1919394  |
| PRMT6    | 0.799515   |
| PRMT8    | 1.2826977  |
| PROCR    | 3.618147   |
| PRODH2   | 0.44830418 |
| PROK2    | 3.0057826  |
| PROM2    | 1.2584155  |
| PRPF31   | 0.7490783  |
| PRPF40A  | 0.35123062 |

|          |            |
|----------|------------|
| PRPF40B  | 0.81409264 |
| PRPS1    | 0.5291939  |
| PRPSAP1  | 0.3712268  |
| PRR15L   | 2.6731608  |
| PRR19    | 0.35007763 |
| PRR9     | 0.5597544  |
| PRRG1    | 0.3090222  |
| PRRG3    | 1.4177318  |
| PRRT4    | 1.9975364  |
| PRSS1    | 11.970859  |
| PRSS16   | 1.2457132  |
| PRSS2    | 11.388641  |
| PRSS22   | 1.2540193  |
| PRSS23   | 1.9111834  |
| PRSS23OS | 1.4339793  |
| PRSS51   | 0.7181952  |
| PRSS8    | 3.1156712  |
| PSAT1    | 1.6904659  |
| PSD3     | 1.4230576  |
| PSEN2    | 0.46287537 |
| PSG18    | 3.2187438  |
| PSG19    | 1.89183    |
| PSG22    | 4.0331936  |
| PSG25    | 1.3487909  |
| PSG27    | 0.8402257  |
| PSG28    | 1.1870906  |
| PSMA3    | 0.64519453 |
| PSMA5    | 0.48001003 |
| PSMA6    | 0.7925892  |
| PSMB10   | 0.46780777 |
| PSMB11   | 2.3407602  |
| PSMB2    | 0.47347116 |
| PSMB6    | 0.31065512 |
| PSMB8    | 0.61333036 |
| PSMD12   | 0.39998293 |
| PSME1    | 0.3698864  |
| PSME2B   | 0.7848563  |
| PSPH     | 0.77109194 |
| PSTPIP2  | 0.5604315  |
| PTAFR    | 1.1130052  |
| PTBP2    | 0.56595945 |
| PTEN     | 0.42120886 |
| PTF1A    | 3.8468084  |
| PTGER3   | 0.93990445 |
| PTGER4   | 0.31369495 |

|           |            |
|-----------|------------|
| PTGES     | 0.60428286 |
| PTGES3    | 0.4525051  |
| PTGES3L   | 0.73459697 |
| PTGFRN    | 1.0133717  |
| PTGS2     | 5.0223465  |
| PTH2      | 0.61101913 |
| PTP4A1    | 0.79170465 |
| PTPLB     | 0.617095   |
| PTPMT1    | 0.90186405 |
| PTPN1     | 1.374877   |
| PTPN13    | 1.0728521  |
| PTPN2     | 1.0661154  |
| PTPN22    | 1.886601   |
| PTPN23    | 0.6605358  |
| PTPN5     | 0.5832877  |
| PTPRK     | 0.72187686 |
| PTPRM     | 1.2718668  |
| PTPRN     | 1.2621777  |
| PTRH1     | 1.1120114  |
| PTTG1IP   | 0.3444252  |
| PTX3      | 6.8272185  |
| PUS7      | 1.0168381  |
| PUS7L     | 0.935307   |
| PVALB     | 1.9028728  |
| PVR       | 2.4597635  |
| PVRL2     | 0.89317083 |
| PVT1      | 0.5821481  |
| PWP1      | 1.064795   |
| PWP2      | 0.8208413  |
| PYDC3     | 2.377266   |
| PYDC4     | 2.6992168  |
| PYHIN1    | 0.7487378  |
| PZP       | 3.6147332  |
| QPRT      | 0.3811679  |
| QSOX1     | 0.6240659  |
| RAB1      | 0.6149349  |
| RAB10     | 0.58015823 |
| RAB11FIP1 | 1.119899   |
| RAB11FIP5 | 0.7470927  |
| RAB12     | 0.64742565 |
| RAB15     | 0.9620557  |
| RAB20     | 2.3292074  |
| RAB25     | 2.1044796  |
| RAB26     | 1.9378207  |
| RAB2A     | 0.31566    |

|          |            |
|----------|------------|
| RAB2B    | 0.6867566  |
| RAB32    | 0.5086918  |
| RAB33A   | 0.75088143 |
| RAB34    | 0.53404903 |
| RAB3IP   | 0.46789694 |
| RAB4B    | 0.7325282  |
| RAB9B    | 1.2422681  |
| RABEPK   | 0.5690398  |
| RABL3    | 0.3966298  |
| RAD21L   | 1.0581472  |
| RAD23B   | 0.67858887 |
| RAET1A   | 2.4503706  |
| RAET1B   | 1.1363282  |
| RAET1C   | 1.4170601  |
| RAET1E   | 1.1714883  |
| RAI14    | 1.2184491  |
| RALA     | 0.6323023  |
| RALGPS1  | 0.52762985 |
| RAMP3    | 4.0458937  |
| RANBP3L  | 1.149523   |
| RANBP9   | 0.4768119  |
| RAP1GDS1 | 0.5720639  |
| RAP2A    | 1.4160886  |
| RAP2B    | 1.5408983  |
| RAPGEF2  | 2.460144   |
| RAPGEF5  | 1.2868166  |
| RAPGEF6  | 0.5354252  |
| RAPH1    | 0.5680857  |
| RARRES1  | 0.6992583  |
| RARRES2  | 1.4534912  |
| RASA2    | 0.97396517 |
| RASA4    | 1.1242571  |
| RASAL2   | 0.53934073 |
| RASD1    | 4.4723964  |
| RASGEF1B | 1.7002549  |
| RASIP1   | 1.700501   |
| RASSF1   | 0.55606556 |
| RAVER2   | 2.9591846  |
| RAX      | 1.6602025  |
| RBBP6    | 0.32013893 |
| RBFOX2   | 0.90900564 |
| RBM17    | 0.512712   |
| RBM19    | 0.47800684 |
| RBM22    | 0.46239018 |
| RBM25    | 0.33912992 |

|         |            |
|---------|------------|
| RBM26   | 0.5663452  |
| RBM27   | 0.6224828  |
| RBM28   | 1.0091505  |
| RBM34   | 0.81263494 |
| RBM46   | 1.4727387  |
| RBM47   | 0.568346   |
| RBMS1   | 1.1784163  |
| RBMS2   | 0.6889186  |
| RBMX    | 0.41754675 |
| RBP1    | 0.76360655 |
| RBPJL   | 1.0739872  |
| RCC2    | 0.7881565  |
| RCL1    | 0.620718   |
| RD3     | 0.7961197  |
| RDH1    | 0.8223617  |
| RDH13   | 0.62989545 |
| RDH5    | 0.40542412 |
| RDH9    | 0.5280585  |
| REEP3   | 0.51108456 |
| REG1    | 13.760693  |
| REG2    | 13.868011  |
| REG3A   | 12.278239  |
| REG3B   | 14.605612  |
| REG3D   | 10.019589  |
| REG3G   | 13.4921055 |
| RELA    | 0.7493038  |
| RELB    | 1.2863464  |
| REN1    | 0.4360857  |
| REPIN1  | 0.90205    |
| RFTN1   | 0.7601552  |
| RFX5    | 0.50963545 |
| RGAG4   | 1.227143   |
| RGL1    | 0.32624102 |
| RGS1    | 3.1003056  |
| RGS17   | 1.3670671  |
| RGS19   | 0.35181236 |
| RGS4    | 2.069599   |
| RGS5    | 0.69620895 |
| RGS8    | 0.62395525 |
| RGS9    | 1.1631451  |
| RHBDF1  | 0.8426752  |
| RHBDF2  | 0.75272036 |
| RHEBL1  | 1.2307706  |
| RHOB    | 0.96208596 |
| RHOBTB1 | 0.58605623 |

|          |            |
|----------|------------|
| RHOC     | 0.9923868  |
| RHOQ     | 0.967504   |
| RHOU     | 1.2330546  |
| RHOX3F   | 0.31591654 |
| RHPN2    | 0.6318579  |
| RIBC2    | 1.0821962  |
| RIC3     | 0.75656796 |
| RIC8     | 0.6273198  |
| RILPL1   | 0.5885167  |
| RILPL2   | 1.287044   |
| RIMS2    | 2.1230638  |
| RIMS4    | 0.9608853  |
| RIOK2    | 0.6819453  |
| RIPK1    | 0.58239555 |
| RIPK2    | 0.8808031  |
| RIPK3    | 0.6283922  |
| RIPK4    | 2.1969376  |
| RLIM     | 0.6912074  |
| RN18S    | 0.98662996 |
| RN45S    | 0.5354018  |
| RNASE1   | 10.185574  |
| RNASE4   | 3.011959   |
| RNASEH1  | 0.47139168 |
| RNASET2A | 0.68961287 |
| RND1     | 1.7449088  |
| RNF103   | 0.81297016 |
| RNF125   | 1.9208436  |
| RNF138   | 0.8497958  |
| RNF149   | 1.7581081  |
| RNF157   | 1.1542983  |
| RNF185   | 1.044322   |
| RNF186   | 3.151113   |
| RNF19B   | 1.4364729  |
| RNF213   | 1.7719874  |
| RNF215   | 0.5160179  |
| RNF217   | 1.4666889  |
| RNF39    | 0.60066295 |
| RNFT2    | 0.83881354 |
| RNU1B6   | 0.8725338  |
| ROBO4    | 1.1814508  |
| ROR2     | 1.4831662  |
| RPAP3    | 0.5156174  |
| RPL39L   | 1.1892343  |
| RPL7L1   | 0.58676624 |
| RPP40    | 1.2160497  |



|          |            |
|----------|------------|
| RPS4L    | 1.5216317  |
| RPS6KB1  | 0.59629965 |
| RPTOR    | 0.44326782 |
| RPTOROS  | 0.3661735  |
| RRAD     | 1.382029   |
| RRAS2    | 1.3488345  |
| RRBP1    | 0.9010148  |
| RRP12    | 0.7748308  |
| RRP15    | 0.7597933  |
| RRP1B    | 1.023047   |
| RRP8     | 0.4194579  |
| RRP9     | 0.7927351  |
| RRS1     | 1.2555704  |
| RS5-8S1  | 2.6520095  |
| RSAD1    | 1.3308706  |
| RSL24D1  | 0.68459797 |
| RTP3     | 0.9554813  |
| RTP4     | 1.4306049  |
| RUFY2    | 0.47437716 |
| RUFY3    | 0.7586484  |
| RUNDC1   | 0.30706072 |
| RUNDC3B  | 1.9817231  |
| RUNX1    | 0.60463095 |
| RUNX2OS1 | 0.41221976 |
| RUNX3    | 0.9555454  |
| RUSC2    | 1.2382207  |
| RXFP1    | 0.5484624  |
| RYBP     | 0.43519592 |
| S100PBP  | 0.538877   |
| SAA1     | 5.298794   |
| SAA2     | 8.709419   |
| SAA3     | 5.4856324  |
| SAG      | 2.1490066  |
| SAMD4B   | 0.81084824 |
| SAMD8    | 1.0169346  |
| SAMHD1   | 0.8862777  |
| SAMSN1   | 1.6139417  |
| SAR1B    | 0.32892323 |
| SASH1    | 1.1642704  |
| SAT1     | 0.4189906  |
| SATB1    | 1.8365579  |
| SAV1     | 0.5878587  |
| SBF2     | 1.2415264  |
| SBNO2    | 1.5459514  |
| SCAMP1   | 0.6627836  |

|          |            |
|----------|------------|
| SCARA3   | 0.5789051  |
| SCARA5   | 1.1783211  |
| SCARF2   | 0.6098528  |
| SCCPDH   | 0.42328835 |
| SCGB1B19 | 1.3179705  |
| SCGB1B2  | 0.8352697  |
| SCGB1B27 | 0.9500091  |
| SCGB2B26 | 0.8923559  |
| SCGB2B7  | 0.90485907 |
| SCGB3A1  | 0.5012944  |
| SCHIP1   | 0.41977644 |
| SCIMP    | 0.41928768 |
| SCIN     | 3.4625468  |
| SCML1    | 1.0974386  |
| SCML4    | 0.8452697  |
| SCN11A   | 1.286978   |
| SCN1A    | 0.3991909  |
| SCN3A    | 0.84670043 |
| SCN5A    | 0.92508507 |
| SCN8A    | 0.48725986 |
| SCO1     | 1.1087518  |
| SCPEP1   | 0.34847498 |
| SCRT1    | 2.5961456  |
| SCRT2    | 1.1023424  |
| SCT      | 1.392693   |
| SDC1     | 1.533021   |
| SDC4     | 3.422792   |
| SDCBP2   | 0.9150491  |
| SDHAF1   | 1.3111482  |
| SDK1     | 0.3867302  |
| SDR39U1  | 0.75992775 |
| SDR9C7   | 0.8162627  |
| SDS      | 2.1619833  |
| SEC1     | 1.8523443  |
| SEC11A   | 0.357244   |
| SEC13    | 0.4966793  |
| SEC23B   | 0.39737082 |
| SEC24A   | 0.8866811  |
| SEC24D   | 1.1031218  |
| SEC31A   | 0.6023731  |
| SEC61A1  | 0.5380454  |
| SEC63    | 0.83223486 |
| SECTM1B  | 0.966177   |
| SEL1L3   | 0.6518605  |
| SELE     | 3.2909698  |

|           |            |
|-----------|------------|
| SELK      | 0.42493248 |
| SELL      | 1.2624636  |
| SELP      | 0.5074372  |
| SELT      | 0.46750927 |
| SEMA3A    | 2.1337109  |
| SEMA3E    | 1.1268806  |
| SEMA3F    | 1.5098381  |
| SEMA3G    | 1.5767436  |
| SEMA4A    | 0.45995808 |
| SEMA4C    | 0.57885075 |
| SEMA6B    | 0.76297903 |
| SEMA6D    | 0.63842344 |
| SEMA7A    | 1.9752951  |
| SENP5     | 0.4510045  |
| SEPW1     | 0.59838724 |
| SERINC1   | 0.44816828 |
| SERINC2   | 1.2811272  |
| SERP1     | 1.1744175  |
| SERPINA10 | 1.7233405  |
| SERPINA1A | 0.44704485 |
| SERPINA1C | 0.42771196 |
| SERPINA1D | 0.41743422 |
| SERPINA3B | 1.0290406  |
| SERPINA3C | 4.130486   |
| SERPINA3F | 2.873423   |
| SERPINA3G | 2.03688    |
| SERPINA3H | 0.7550812  |
| SERPINA3I | 2.1553273  |
| SERPINA3K | 6.0869713  |
| SERPINA3M | 2.5474672  |
| SERPINA3N | 3.9883847  |
| SERPINA5  | 0.87769556 |
| SERPINB1B | 1.4844162  |
| SERPINB1C | 0.70320773 |
| SERPINB6B | 0.81572056 |
| SERPINB6D | 0.9631543  |
| SERPINB7  | 1.9256096  |
| SERPINB8  | 0.61342716 |
| SERPINB9  | 0.98894024 |
| SERPINB9D | 0.95934224 |
| SERPINB9E | 0.90870094 |
| SERPINC1  | 0.7523091  |
| SERPINE1  | 5.208542   |
| SERPING1  | 1.2945924  |
| SERPINI1  | 0.74627304 |

|          |            |
|----------|------------|
| SERPINI2 | 7.5899296  |
| SESN1    | 0.44315672 |
| SESTD1   | 0.9034114  |
| SET      | 0.48585844 |
| SETD4    | 0.63612604 |
| SETDB2   | 0.681818   |
| SEZ6L2   | 0.62358403 |
| SF11     | 1.4509997  |
| SFMBT2   | 2.016742   |
| SFR1     | 0.7105417  |
| SGCB     | 1.2728329  |
| SGK2     | 2.6469991  |
| SGPL1    | 0.7245102  |
| SGSH     | 0.5512557  |
| SH2D1B2  | 1.0046391  |
| SH3BP2   | 0.6798072  |
| SH3BP5   | 0.62536955 |
| SH3D21   | 0.6121373  |
| SH3GL3   | 2.156971   |
| SH3PXD2B | 0.82336664 |
| SHBG     | 0.45251656 |
| SHE      | 0.541131   |
| SHISA3   | 4.1441927  |
| SHISA5   | 1.0528941  |
| SHMT1    | 1.2072141  |
| SHMT2    | 0.7895074  |
| SHROOM2  | 1.2759628  |
| SIAH2    | 2.130128   |
| SIDT1    | 0.66260195 |
| SIGLECE  | 0.6362896  |
| SIGMAR1  | 0.34878826 |
| SIK1     | 1.5646172  |
| SIN3B    | 0.8205972  |
| SIPA1L1  | 1.3467512  |
| SIX3OS1  | 0.37659907 |
| SKAP2    | 0.8073306  |
| SKIL     | 1.1012516  |
| SKINT1   | 0.97017026 |
| SKINT7   | 0.5029192  |
| SKOR1    | 2.1334264  |
| SKOR2    | 0.49780393 |
| SLA      | 0.6695566  |
| SLAIN1   | 0.52078915 |
| SLAMF1   | 1.3513851  |
| SLAMF7   | 0.9527726  |

|          |            |
|----------|------------|
| SLAMF9   | 1.6268735  |
| SLC10A2  | 0.60418177 |
| SLC10A3  | 0.4462533  |
| SLC10A6  | 3.554876   |
| SLC11A1  | 1.3129306  |
| SLC12A3  | 1.3903363  |
| SLC12A4  | 0.38147306 |
| SLC12A8  | 1.5886798  |
| SLC13A5  | 0.980268   |
| SLC15A2  | 0.9235368  |
| SLC15A3  | 2.3709831  |
| SLC16A3  | 2.2731867  |
| SLC16A9  | 0.6478362  |
| SLC17A9  | 0.43161678 |
| SLC18A3  | 0.8150432  |
| SLC19A1  | 0.6285701  |
| SLC1A4   | 0.8933053  |
| SLC22A12 | 1.0199385  |
| SLC22A13 | 0.68942094 |
| SLC23A2  | 0.90735793 |
| SLC25A17 | 0.43770027 |
| SLC25A19 | 1.1655793  |
| SLC25A22 | 2.3781998  |
| SLC25A25 | 0.44929743 |
| SLC25A28 | 0.42288065 |
| SLC25A29 | 0.85202956 |
| SLC25A32 | 0.6142607  |
| SLC25A33 | 0.77701426 |
| SLC25A34 | 0.8885188  |
| SLC25A36 | 0.6368809  |
| SLC25A4  | 0.6094923  |
| SLC25A48 | 0.5751116  |
| SLC25A5  | 0.35679674 |
| SLC25A53 | 0.6459975  |
| SLC26A4  | 2.2705345  |
| SLC26A9  | 4.702795   |
| SLC27A1  | 0.9123969  |
| SLC27A5  | 0.74379325 |
| SLC28A3  | 1.3395741  |
| SLC29A2  | 1.435677   |
| SLC2A1   | 2.090353   |
| SLC2A10  | 1.1656337  |
| SLC2A6   | 2.782195   |
| SLC2A7   | 0.95133185 |
| SLC30A4  | 0.85532856 |

|           |            |
|-----------|------------|
| SLC30A7   | 0.5757463  |
| SLC31A2   | 1.6257424  |
| SLC33A1   | 0.42683887 |
| SLC34A2   | 1.2769227  |
| SLC35B3   | 0.43054867 |
| SLC35E3   | 0.5549288  |
| SLC35E4   | 0.5177183  |
| SLC35F2   | 1.6357656  |
| SLC35F5   | 1.1372194  |
| SLC35G2   | 0.8134506  |
| SLC36A1OS | 1.0136757  |
| SLC36A2   | 0.45638895 |
| SLC38A1   | 0.3674512  |
| SLC38A2   | 0.30797005 |
| SLC38A3   | 2.6567526  |
| SLC38A4   | 1.7701435  |
| SLC39A1   | 0.89051485 |
| SLC39A10  | 0.85345125 |
| SLC39A14  | 3.0932593  |
| SLC39A4   | 0.5498781  |
| SLC39A5   | 1.3576713  |
| SLC39A6   | 0.9984851  |
| SLC44A4   | 0.986856   |
| SLC46A2   | 0.8613136  |
| SLC47A2   | 0.538527   |
| SLC4A4    | 2.5535862  |
| SLC4A7    | 0.5550108  |
| SLC50A1   | 0.4128394  |
| SLC52A2   | 0.6308017  |
| SLC5A3    | 0.5304842  |
| SLC5A6    | 0.57000303 |
| SLC5A8    | 1.2639942  |
| SLC6A16   | 0.4355693  |
| SLC6A19OS | 1.2445407  |
| SLC6A6    | 0.5859146  |
| SLC6A7    | 0.9304879  |
| SLC7A1    | 0.6717005  |
| SLC7A11   | 1.622761   |
| SLC7A13   | 1.0951302  |
| SLC7A2    | 2.5216537  |
| SLC7A3    | 3.561843   |
| SLC7A5    | 0.44217634 |
| SLC7A6    | 1.0541601  |
| SLC7A8    | 0.82006407 |
| SLC8B1    | 1.0369887  |

|          |            |
|----------|------------|
| SLC9A5   | 1.1304317  |
| SLC9A6   | 0.38847542 |
| SLC9B1   | 0.7929797  |
| SLCO1B2  | 0.922544   |
| SLCO3A1  | 1.054429   |
| SLCO4A1  | 0.74429417 |
| SLFN1    | 1.3981452  |
| SLFN2    | 1.3890643  |
| SLFN4    | 1.2942853  |
| SLFN5    | 0.44209385 |
| SLFN8    | 0.7987828  |
| SLITRK3  | 0.7221937  |
| SLITRK4  | 0.8711877  |
| SLITRK5  | 0.9603896  |
| SLPI     | 0.45761156 |
| SMAD1    | 1.7256789  |
| SMAD2    | 0.9944539  |
| SMAD3    | 0.7170725  |
| SMAD4    | 0.86426497 |
| SMAD5    | 0.45953083 |
| SMAGP    | 0.6238165  |
| SMCO3    | 1.0858402  |
| SMIM22   | 3.717721   |
| SMN1     | 0.36650085 |
| SMOC1    | 1.3785474  |
| SMOC2    | 0.58946276 |
| SMPDL3B  | 0.8843465  |
| SMS      | 0.63210106 |
| SMYD2    | 0.7020917  |
| SMYD3    | 0.3838868  |
| SMYD5    | 1.1021118  |
| SNAPC1   | 0.49052525 |
| SNAPC4   | 0.44784355 |
| SNHG1    | 0.75518036 |
| SNHG12   | 1.1369357  |
| SNHG3    | 0.60962486 |
| SNHG7    | 0.74445057 |
| SNORA74A | 0.6754346  |
| SNTB2    | 1.6369514  |
| SNX10    | 1.6010828  |
| SNX12    | 0.45786572 |
| SNX18    | 1.4823179  |
| SNX20    | 0.5238662  |
| SNX6     | 0.6468134  |
| SNX7     | 0.7517309  |

|            |            |
|------------|------------|
| SOCS1      | 2.369255   |
| SOCS2      | 1.7987466  |
| SOCS3      | 3.7506132  |
| SOD2       | 1.9517536  |
| SOHLH2     | 0.5312941  |
| SORBS3     | 0.7462976  |
| SORCS1     | 1.4935014  |
| SOSTDC1    | 1.4543424  |
| SOWAHC     | 1.6592469  |
| SOX7       | 1.6990426  |
| SOX9       | 1.0603983  |
| SP140      | 0.49705553 |
| SP6        | 1.1658945  |
| SPACA3     | 0.9640093  |
| SPAG9      | 0.368248   |
| SPATA20    | 0.5447478  |
| SPATA25    | 0.6848521  |
| SPATA5L1   | 0.4697349  |
| SPATS2     | 0.90326476 |
| SPDEF      | 2.363796   |
| SPEER1-PS1 | 0.3062334  |
| SPEER2     | 0.78205466 |
| SPEER4A    | 0.47929478 |
| SPEER4B    | 1.2317321  |
| SPEER5-PS1 | 0.59509015 |
| SPEF2      | 0.89495325 |
| SPG20      | 0.7447121  |
| SPG21      | 0.3434124  |
| SPIC       | 0.9985318  |
| SPIN1      | 0.9407983  |
| SPINK14    | 0.87632847 |
| SPINK3     | 10.965017  |
| SPINK5     | 1.063067   |
| SPINT1     | 1.0895622  |
| SPINT2     | 0.53434706 |
| SPINT4     | 1.3428802  |
| SPO11      | 0.67228746 |
| SPON1      | 2.191512   |
| SPPL2A     | 1.0695133  |
| SPRED1     | 1.0028687  |
| SPRED2     | 0.879158   |
| SPRR2D     | 6.259442   |
| SPRR2E     | 1.401098   |
| SPRR2G     | 3.1861439  |
| SPRY2      | 0.8292749  |



|            |            |
|------------|------------|
| SPRYD7     | 0.74718475 |
| SPSB1      | 0.99877095 |
| SPTLC2     | 0.40502167 |
| SPTSSB     | 1.0652099  |
| SRA1       | 0.48229122 |
| SRD5A2     | 1.5772662  |
| SREK1      | 0.48956108 |
| SRFBP1     | 0.7982769  |
| SRGAP1     | 1.3160167  |
| SRGN       | 0.76314926 |
| SRM        | 0.75351477 |
| SRP68      | 0.33925962 |
| SRP9       | 0.37924194 |
| SRPRB      | 0.61704826 |
| SRRM3OS    | 1.6378489  |
| SRY        | 1.2563403  |
| SSH2       | 1.1888514  |
| SSH3       | 1.067162   |
| SSR3       | 0.60394955 |
| SSSCA1     | 0.52830553 |
| SSTR1      | 0.7064471  |
| SSU72      | 0.54593325 |
| SSX9       | 0.89829826 |
| SSXB7      | 0.84708214 |
| ST13       | 0.5791054  |
| ST14       | 0.5101285  |
| ST6GALNAC4 | 1.2187662  |
| ST6GALNAC5 | 1.3565638  |
| ST8SIA1    | 0.72857976 |
| ST8SIA2    | 1.1102021  |
| STAB1      | 1.2723045  |
| STAC       | 1.3148618  |
| STAG3      | 0.5245116  |
| STAM       | 0.525146   |
| STAM2      | 1.0691328  |
| STARD13    | 0.71599865 |
| STARD5     | 0.45637465 |
| STARD7     | 0.97462606 |
| STAT2      | 1.0791183  |
| STAT3      | 1.5922232  |
| STAT4      | 1.4695821  |
| STAT6      | 0.34333944 |
| STC1       | 2.9026022  |
| STEAP1     | 5.815458   |
| STEAP2     | 3.4546752  |

|           |            |
|-----------|------------|
| STEAP4    | 1.7407432  |
| STFA1     | 1.8842936  |
| STFA2     | 2.270844   |
| STFA2L1   | 2.1803465  |
| STFA3     | 2.043644   |
| STK17B    | 1.1825233  |
| STK19     | 1.1249294  |
| STK32A    | 1.9159834  |
| STK39     | 1.6758242  |
| STK40     | 0.8640642  |
| STOML1    | 0.7959361  |
| STOML3    | 1.0439568  |
| STON1     | 1.8721786  |
| STRA6     | 2.9757552  |
| STRIP1    | 0.6257701  |
| STRIP2    | 1.3041162  |
| STX12     | 0.65057755 |
| STX18     | 0.43388033 |
| STX8      | 0.4894786  |
| STXBP3A   | 1.0871911  |
| STXBP3B   | 0.92165613 |
| STXBP5L   | 0.925756   |
| SUCO      | 0.62087154 |
| SULF1     | 1.114336   |
| SULT3A1   | 0.9414754  |
| SUPV3L1   | 0.50230026 |
| SURF4     | 0.8062811  |
| SURF6     | 0.7868142  |
| SUSD2     | 1.4056592  |
| SUV39H2   | 0.3763671  |
| SVAL1     | 1.3814425  |
| SYAP1     | 0.45990038 |
| SYCE1L    | 1.1351402  |
| SYCN      | 11.438496  |
| SYCP1-PS1 | 0.6226635  |
| SYDE1     | 0.88934565 |
| SYK       | 0.919302   |
| SYN1      | 1.002953   |
| SYN2      | 1.4022579  |
| SYNCRIP   | 0.5463171  |
| SYNGR2    | 0.6656656  |
| SYNGR3    | 0.71668863 |
| SYNPO     | 1.1792257  |
| SYNPO2L   | 0.65539026 |
| SYNPR     | 0.58958006 |

|          |            |
|----------|------------|
| SYP      | 0.40308332 |
| SYPL     | 0.5376773  |
| SYT13    | 1.9684186  |
| SYT2     | 1.0723736  |
| SYT8     | 0.6178477  |
| SYTL3    | 1.8535318  |
| TAAR7B   | 2.1089823  |
| TAC1     | 1.0268321  |
| TADA2A   | 0.3336668  |
| TADA2B   | 0.34549975 |
| TAF1A    | 1.1950788  |
| TAF1D    | 0.9417496  |
| TAF4B    | 1.0538545  |
| TAGAP    | 0.5232825  |
| TAGLN2   | 0.6936984  |
| TAL2     | 1.182488   |
| TANC1    | 0.63597393 |
| TAP1     | 0.94574356 |
| TAP2     | 1.1194959  |
| TAPBP    | 0.6789074  |
| TAPBPL   | 0.73923874 |
| TARS     | 0.5695834  |
| TAS2R106 | 1.2936621  |
| TAS2R134 | 1.8202925  |
| TAS2R138 | 1.2387142  |
| TAS2R143 | 0.9419315  |
| TAT      | 1.1321483  |
| TBC1D1   | 1.050951   |
| TBC1D14  | 0.34186125 |
| TBC1D15  | 0.4169197  |
| TBC1D23  | 0.49372196 |
| TBC1D30  | 1.4195232  |
| TBC1D4   | 1.641192   |
| TBC1D9   | 1.3600245  |
| TBCB     | 0.57169294 |
| TBK1     | 0.58095455 |
| TBL3     | 0.4376073  |
| TBX1     | 2.2526228  |
| TBX3     | 1.5553284  |
| TC2N     | 3.9086185  |
| TCAM1    | 1.6297574  |
| TCF4     | 0.64388895 |
| TCF7     | 0.77854824 |
| TCIRG1   | 0.37806654 |
| TCL1B2   | 1.0477102  |

|         |            |
|---------|------------|
| TCOF1   | 0.5511341  |
| TCP10B  | 1.5949643  |
| TCP10C  | 0.88962245 |
| TDG     | 0.92742157 |
| TDH     | 2.8079844  |
| TDRD1   | 0.89934945 |
| TDRD7   | 0.72508097 |
| TDRD9   | 1.0056896  |
| TDRP    | 1.0889893  |
| TEAD1   | 1.5427728  |
| TEAD3   | 1.1720121  |
| TEAD4   | 1.5199823  |
| TEKT3   | 1.2453947  |
| TES     | 1.1836772  |
| TET2    | 0.76671505 |
| TEX10   | 0.5125952  |
| TEX12   | 1.2617378  |
| TEX26   | 1.684068   |
| TEX264  | 0.4801507  |
| TEX40   | 0.94087005 |
| TFCP2L1 | 1.035891   |
| TFF2    | 8.525592   |
| TG      | 0.92957306 |
| TGFA    | 0.7086618  |
| TGFBR2  | 0.43873405 |
| TGFBR3  | 0.7243352  |
| TGIF1   | 2.2604098  |
| TGM2    | 2.2604632  |
| TGM4    | 0.9077215  |
| TGOLN1  | 0.57487726 |
| TGOLN2  | 0.44109154 |
| TGTP1   | 1.0196567  |
| TGTP2   | 1.0470119  |
| THA1    | 1.7477489  |
| THADA   | 0.63043237 |
| THBS1   | 0.9789958  |
| THBS4   | 1.5162158  |
| THEG    | 0.8341849  |
| THEM4   | 0.8214879  |
| THEMIS2 | 0.4544158  |
| THOC5   | 0.44535446 |
| THUMPD1 | 0.65816116 |
| TIGD2   | 0.72164106 |
| TIGIT   | 1.2931657  |
| TIMM10  | 0.3970499  |

|          |            |
|----------|------------|
| TIMM23   | 0.55886173 |
| TIMM8A1  | 0.5411372  |
| TIMM9    | 0.75055027 |
| TIMP1    | 4.2608776  |
| TIMP3    | 1.4718428  |
| TIPARP   | 2.443614   |
| TIRAP    | 0.5554395  |
| TLE1     | 0.477571   |
| TLK2     | 0.36935997 |
| TLR2     | 1.3897991  |
| TLR6     | 1.0996609  |
| TLR7     | 0.89715815 |
| TM2D1    | 1.0242734  |
| TM4SF1   | 0.39056396 |
| TM6SF2   | 1.1199608  |
| TM9SF3   | 0.346673   |
| TM9SF4   | 0.36402702 |
| TMA16    | 2.0654426  |
| TMBIM1   | 1.1230416  |
| TMBIM4   | 0.5713415  |
| TMC1     | 1.2795935  |
| TMC3     | 3.3170109  |
| TMC5     | 4.697483   |
| TMCC3    | 0.32741547 |
| TMCO4    | 1.1469512  |
| TMED1    | 0.4486246  |
| TMED11   | 1.6272044  |
| TMED5    | 1.1518636  |
| TMED6    | 3.60428    |
| TMEFF1   | 1.8298817  |
| TMEM11   | 0.64293003 |
| TMEM119  | 1.5560007  |
| TMEM120A | 0.7126632  |
| TMEM123  | 0.807518   |
| TMEM125  | 2.179367   |
| TMEM128  | 0.57929134 |
| TMEM131  | 1.0025492  |
| TMEM132E | 3.855729   |
| TMEM139  | 0.7583778  |
| TMEM140  | 1.1005473  |
| TMEM150C | 1.2308626  |
| TMEM159  | 1.6043558  |
| TMEM161B | 0.55207705 |
| TMEM17   | 0.61724496 |
| TMEM171  | 2.7049851  |

|           |            |
|-----------|------------|
| TMEM173   | 0.6875181  |
| TMEM176B  | 0.5776324  |
| TMEM178   | 1.3619487  |
| TMEM181A  | 0.74617195 |
| TMEM184B  | 0.6925316  |
| TMEM185B  | 0.8500514  |
| TMEM192   | 0.60327387 |
| TMEM199   | 0.49795866 |
| TMEM202   | 1.6013334  |
| TMEM213   | 0.96437883 |
| TMEM215   | 0.44020653 |
| TMEM217   | 0.7328696  |
| TMEM239   | 0.53048134 |
| TMEM243   | 0.6660409  |
| TMEM245   | 0.33235502 |
| TMEM248   | 0.47218847 |
| TMEM251   | 0.439281   |
| TMEM252   | 3.6473072  |
| TMEM253   | 0.59702563 |
| TMEM30A   | 0.48684072 |
| TMEM30B   | 3.1504097  |
| TMEM45A   | 1.3637865  |
| TMEM5     | 0.5919938  |
| TMEM62    | 0.79506874 |
| TMEM63C   | 3.535708   |
| TMEM68    | 0.39681578 |
| TMEM70    | 0.5670576  |
| TMEM87B   | 1.0862441  |
| TMEM88    | 0.49681902 |
| TMEM92    | 1.2119703  |
| TMEM97    | 0.58215904 |
| TMEVPG1   | 0.61439776 |
| TMPRSS2   | 2.8746417  |
| TMPRSS3   | 0.6216445  |
| TMTC2     | 2.2053819  |
| TNC       | 1.3498442  |
| TNF       | 2.2247972  |
| TNFAIP1   | 1.4842715  |
| TNFAIP3   | 3.5346022  |
| TNFAIP6   | 2.9627078  |
| TNFRSF10B | 1.6036491  |
| TNFRSF11B | 1.0473626  |
| TNFRSF12A | 2.2571573  |
| TNFRSF18  | 1.4665303  |
| TNFRSF1A  | 0.5760875  |

|          |            |
|----------|------------|
| TNFRSF1B | 1.0171871  |
| TNFRSF23 | 0.48742795 |
| TNFRSF25 | 1.398449   |
| TNFRSF26 | 1.1265693  |
| TNFRSF4  | 2.2342062  |
| TNFRSF8  | 0.5900984  |
| TNFRSF9  | 0.8789964  |
| TNFSF15  | 2.2809033  |
| TNFSF8   | 0.99408126 |
| TNFSF9   | 2.201325   |
| TNIP1    | 1.954802   |
| TNIP2    | 1.6103606  |
| TNIP3    | 4.466367   |
| TNKS1BP1 | 0.8487234  |
| TNKS2    | 0.46936607 |
| TNN      | 2.6868262  |
| TNNI3K   | 0.6935127  |
| TNP2     | 2.1175797  |
| TOMM20L  | 1.016763   |
| TOMM40   | 0.4407997  |
| TOMM5    | 0.7692337  |
| TOP1MT   | 1.0662346  |
| TOR3A    | 1.5138769  |
| TOX2     | 0.6330507  |
| TOX3     | 1.0783398  |
| TPD52    | 0.6628871  |
| TPD52L1  | 1.279635   |
| TPI1     | 0.6641803  |
| TPM3     | 0.66782    |
| TPM4     | 0.3893795  |
| TPSAB1   | 1.2964227  |
| TPST2    | 0.5553222  |
| TRAF1    | 1.8038673  |
| TRAF3    | 0.8093934  |
| TRAFD1   | 0.9884696  |
| TRAK1    | 0.42465305 |
| TRAPPC4  | 0.36607313 |
| TRDMT1   | 0.7035732  |
| TREM1    | 0.9971881  |
| TREML2   | 0.6679802  |
| TREX1    | 0.9749718  |
| TRIB1    | 0.8739462  |
| TRIB2    | 1.0894666  |
| TRIB3    | 3.35849    |
| TRIM12C  | 0.7314043  |

|           |            |
|-----------|------------|
| TRIM13    | 0.7711139  |
| TRIM14    | 0.39172316 |
| TRIM25    | 0.444983   |
| TRIM26    | 0.7476773  |
| TRIM29    | 1.4181259  |
| TRIM30A   | 1.3126278  |
| TRIM30B   | 0.66664124 |
| TRIM30C   | 2.2132757  |
| TRIM30D   | 1.0439835  |
| TRIM31    | 0.9569483  |
| TRIM35    | 0.91408396 |
| TRIM36    | 0.7328589  |
| TRIM42    | 0.49999523 |
| TRIM47    | 0.88115025 |
| TRIM50    | 3.1944678  |
| TRIM72    | 0.9623537  |
| TRIML2    | 1.0480249  |
| TRIO      | 0.55609226 |
| TRIP10    | 1.0315013  |
| TRMT1     | 0.44081783 |
| TRMT61B   | 0.50571203 |
| TRNAU1AP  | 0.9018235  |
| TRNP1     | 4.285512   |
| TRNT1     | 0.52411604 |
| TRP53I11  | 0.615891   |
| TRP53INP1 | 0.6227355  |
| TRP53INP2 | 1.0025172  |
| TRPC5     | 0.92217994 |
| TRPV4     | 0.88921213 |
| TRY4      | 10.630831  |
| TRY5      | 10.727789  |
| TSC22D3   | 1.1594801  |
| TSGA13    | 1.4173684  |
| TSHZ3     | 1.1508942  |
| TSKU      | 0.7853408  |
| TSPAN1    | 2.2052345  |
| TSPAN11   | 0.43615055 |
| TSPAN3    | 0.8711829  |
| TSPAN6    | 0.4786296  |
| TSR1      | 0.60425806 |
| TTC12     | 0.69598293 |
| TTC18     | 1.1909707  |
| TTC27     | 0.4278202  |
| TTC39B    | 1.5162454  |
| TTC39C    | 0.5811329  |



|         |            |
|---------|------------|
| TTC39D  | 0.96767473 |
| TTI2    | 0.65555096 |
| TTL     | 0.43212295 |
| TTLL2   | 1.8038628  |
| TTLL8   | 0.7087438  |
| TTLL9   | 1.0355744  |
| TTR     | 1.7579603  |
| TTYH1   | 1.5412273  |
| TUBB2B  | 0.8482609  |
| TUBB6   | 1.7016501  |
| TULP3   | 0.5086663  |
| TULP4   | 1.4875569  |
| TUT1    | 0.55201435 |
| TWIST2  | 1.4831185  |
| TXK     | 1.4036832  |
| TXNRD1  | 0.94198036 |
| TXNRD3  | 1.4877176  |
| TYRO3   | 0.5863886  |
| TYW5    | 0.79343796 |
| U90926  | 3.1142192  |
| UACA    | 0.6560993  |
| UBA5    | 0.588665   |
| UBAC2   | 0.54751253 |
| UBD     | 2.1790743  |
| UBE2D3  | 0.6038208  |
| UBE2E1  | 0.71363926 |
| UBE2E2  | 0.3610015  |
| UBE2G1  | 0.6834917  |
| UBE2J1  | 0.560493   |
| UBE2Q2  | 0.54853916 |
| UBE2QL1 | 1.5183513  |
| UBL3    | 1.040431   |
| UBQLN1  | 1.0248709  |
| UBR4    | 0.3432412  |
| UBXN6   | 0.4326334  |
| UCHL3   | 0.92898273 |
| UCK2    | 0.36954355 |
| UFL1    | 0.5648556  |
| UFM1    | 0.6322694  |
| UGDH    | 0.6073003  |
| UGP2    | 0.3364849  |
| UGT3A2  | 0.7106509  |
| UMOD    | 2.5272975  |
| UMODL1  | 0.5566051  |
| UNC13B  | 0.9556143  |

|          |            |
|----------|------------|
| UNC45A   | 0.67680836 |
| UNC5C    | 0.56893635 |
| UNC80    | 0.566062   |
| UNC93A   | 1.6676438  |
| UNG      | 0.52295876 |
| UOX      | 0.72076106 |
| UPK1A    | 0.5007951  |
| UPK3BL   | 0.52772737 |
| UPP1     | 3.4946098  |
| URAH     | 4.4691677  |
| UROC1    | 1.5111439  |
| USP13    | 1.154702   |
| USP17LE  | 1.1032503  |
| USP18    | 1.8031125  |
| USP22    | 0.80157423 |
| USP3     | 0.84462976 |
| USP30    | 0.6759758  |
| USP53    | 1.4009161  |
| UST      | 1.030062   |
| UTF1     | 0.6169467  |
| UTP11L   | 0.7855072  |
| UTP15    | 0.5657253  |
| UTP20    | 0.49699497 |
| VAMP4    | 0.4874401  |
| VAMP7    | 0.5798869  |
| VAPA     | 0.7115483  |
| VAT1     | 0.9817066  |
| VAV1     | 0.8458824  |
| VCAN     | 1.3548017  |
| VCPKMT   | 0.61251307 |
| VDAC2    | 0.77377367 |
| VDR      | 3.7026114  |
| VEPH1    | 1.2416937  |
| VGf      | 6.6463757  |
| VIL1     | 2.2449396  |
| VIMP     | 0.7711973  |
| VLDLR    | 1.3554454  |
| VMN1R13  | 1.0258842  |
| VMN1R18  | 1.0504339  |
| VMN1R212 | 1.0800683  |
| VMN1R236 | 1.2254503  |
| VMN1R24  | 1.0247321  |
| VMN1R54  | 0.9567051  |
| VMN1R72  | 0.7387788  |
| VMN2R11  | 0.6733811  |

|          |            |
|----------|------------|
| VMN2R12  | 1.620297   |
| VMN2R121 | 1.3509657  |
| VMN2R13  | 1.2616496  |
| VMN2R88  | 0.57313323 |
| VMN2R96  | 0.8968265  |
| VMP1     | 1.3127623  |
| VNN1     | 1.1049211  |
| VNN3     | 3.52235    |
| VPS33B   | 0.49228525 |
| VPS37B   | 0.6167941  |
| VPS4B    | 0.4607644  |
| VPS54    | 0.8166466  |
| VSIG2    | 0.46673083 |
| VSIG8    | 0.86445665 |
| VTI1A    | 0.42990637 |
| VTN      | 5.4852066  |
| VWA2     | 1.063551   |
| VWA3B    | 0.66003275 |
| VWA5A    | 0.7472005  |
| VWA5B2   | 0.88782334 |
| VWA8     | 0.51903534 |
| WARS     | 1.2256861  |
| WASF1    | 0.7050872  |
| WASH     | 0.5529032  |
| WBSCR17  | 0.7931485  |
| WDR1     | 1.1320806  |
| WDR12    | 0.4055419  |
| WDR3     | 0.37610722 |
| WDR36    | 0.6367297  |
| WDR37    | 0.47156858 |
| WDR43    | 1.0092511  |
| WDR45B   | 0.43328    |
| WDR46    | 0.39084673 |
| WDR52    | 0.37097645 |
| WDR59    | 0.51519847 |
| WDR64    | 1.0761154  |
| WDR77    | 0.36481285 |
| WDR78    | 0.35582495 |
| WDR89    | 0.43945265 |
| WDR92    | 2.5690227  |
| WFDC12   | 1.050776   |
| WFDC15A  | 1.2319648  |
| WFDC17   | 3.1163697  |
| WFDC18   | 3.1319094  |
| WFIKKN2  | 0.9740672  |

|          |            |
|----------|------------|
| WFS1     | 0.67546797 |
| WIPF3    | 0.5825336  |
| WNK2     | 2.5982687  |
| WNK3     | 0.94614387 |
| WNT8A    | 1.2858758  |
| WNT9B    | 2.0715234  |
| WT1      | 0.7737198  |
| WVOX     | 0.6246116  |
| WWTR1    | 0.45698762 |
| XAF1     | 0.5886984  |
| XBP1     | 0.99797773 |
| XKR8     | 1.63662    |
| XLR3B    | 0.5214877  |
| XLR5B    | 1.1196456  |
| XPA      | 0.5060172  |
| XPOT     | 0.72723436 |
| XRCC4    | 0.49456072 |
| XRCC6BP1 | 0.85783863 |
| XRN2     | 0.768219   |
| XXYLT1   | 0.41712904 |
| YAE1D1   | 0.9986057  |
| YAP1     | 0.76591015 |
| YARS     | 0.88887835 |
| YDJC     | 0.82159424 |
| YIPF6    | 0.3097167  |
| YTHDC1   | 0.56255865 |
| YWHAG    | 0.87340736 |
| ZAP70    | 0.33581972 |
| ZBBX     | 0.6151109  |
| ZBED3    | 0.7759435  |
| ZBED5    | 0.52731085 |
| ZBED6    | 0.73523617 |
| ZBP1     | 2.3588014  |
| ZBTB10   | 1.1795781  |
| ZBTB16   | 2.6813579  |
| ZBTB18   | 0.6534548  |
| ZBTB25   | 0.6499615  |
| ZBTB26   | 0.67897916 |
| ZBTB32   | 1.6441598  |
| ZBTB37   | 0.60935235 |
| ZBTB8B   | 1.4378688  |
| ZC2HC1A  | 0.3652897  |
| ZC3H12A  | 2.1730754  |
| ZC3H12C  | 0.8585911  |
| ZC3H12D  | 0.98511076 |

|           |            |
|-----------|------------|
| ZC3H7A    | 0.63232327 |
| ZC3H8     | 0.6635146  |
| ZC3HAV1   | 0.44222403 |
| ZCCHC14   | 0.37848473 |
| ZCCHC2    | 0.81520796 |
| ZCCHC9    | 0.58644915 |
| ZDHHC18   | 0.9266176  |
| ZDHHC19   | 1.1738532  |
| ZDHHC2    | 0.5694499  |
| ZDHHC23   | 0.9118438  |
| ZFHX4     | 0.86230636 |
| ZFP1      | 0.98063564 |
| ZFP105    | 0.60368013 |
| ZFP112    | 1.1910517  |
| ZFP133-PS | 0.7767739  |
| ZFP169    | 0.72185516 |
| ZFP202    | 0.7740834  |
| ZFP26     | 0.42027855 |
| ZFP263    | 0.8831239  |
| ZFP275    | 0.5189209  |
| ZFP281    | 1.48663    |
| ZFP287    | 0.3240943  |
| ZFP296    | 0.35565233 |
| ZFP319    | 0.70943356 |
| ZFP334    | 1.2713356  |
| ZFP345    | 0.48257184 |
| ZFP36     | 1.8616858  |
| ZFP365    | 1.0823321  |
| ZFP366    | 1.0918634  |
| ZFP36L1   | 0.95060444 |
| ZFP36L2   | 1.0546021  |
| ZFP37     | 0.6343641  |
| ZFP386    | 0.6338992  |
| ZFP420    | 0.5575874  |
| ZFP428    | 0.6910851  |
| ZFP462    | 1.2298632  |
| ZFP513    | 0.92262983 |
| ZFP516    | 0.6514549  |
| ZFP52     | 0.7501354  |
| ZFP532    | 0.29983234 |
| ZFP536    | 0.7895498  |
| ZFP566    | 0.6438627  |
| ZFP57     | 0.57289886 |
| ZFP575    | 1.3432176  |
| ZFP612    | 0.78151083 |

|         |            |
|---------|------------|
| ZFP64   | 0.49258327 |
| ZFP648  | 0.4125061  |
| ZFP653  | 0.4065609  |
| ZFP691  | 0.7331891  |
| ZFP692  | 0.38758945 |
| ZFP697  | 1.9287434  |
| ZFP738  | 1.6277845  |
| ZFP783  | 1.067224   |
| ZFP790  | 1.3532209  |
| ZFP799  | 0.63856673 |
| ZFP811  | 4.0753508  |
| ZFP819  | 1.7347836  |
| ZFP850S | 1.3585482  |
| ZFP868  | 0.42039347 |
| ZFP9    | 1.4823241  |
| ZFYVE16 | 0.54144955 |
| ZFYVE20 | 0.57118845 |
| ZG16    | 6.806767   |
| ZHX2    | 1.3087499  |
| ZIC4    | 0.98608065 |
| ZIC5    | 0.7853513  |
| ZKSCAN2 | 1.9341905  |
| ZMIZ2   | 0.40500355 |
| ZMYND15 | 0.50298643 |
| ZNFX1   | 0.7748232  |
| ZNHIT6  | 0.8430691  |
| ZNRF1   | 1.1627941  |
| ZP3     | 1.37689    |
| ZPR1    | 0.3521676  |
| ZSCAN18 | 1.474529   |
| ZSCAN26 | 0.38352728 |
| ZSWIM4  | 1.0331421  |
| ZSWIM5  | 0.8704777  |
| ZSWIM7  | 0.33888483 |
| ZSWIM8  | 0.58932066 |
| ZUFSP   | 0.8280449  |
| ZYG11B  | 0.8438854  |

**Mice\_onset\_lung\_DEgenes\_fc**

| <b>Gene</b> | <b>Log2 Fold Change</b> |
|-------------|-------------------------|
| A1BG        | -9.025497               |
| A1CF        | -8.129772               |
| A26C2       | -2.2345595              |
| AAAS        | -1.9095898              |
| AACS        | -2.1521583              |
| AADAC       | -13.358604              |
| AADACL2     | -2.193484               |
| AADACL3     | -2.066179               |
| AADAT       | -3.2825768              |
| AAED1       | -1.7279673              |
| AAGAB       | -1.177701               |
| AAMDC       | -1.7845306              |
| AAMP        | -1.666285               |
| AANAT       | -1.0991445              |
| AAR2        | -1.2071056              |
| AARS        | -2.0535097              |
| AARS2       | -1.506824               |
| AARSD1      | -1.5141568              |
| AASDH       | -0.8938384              |
| AASDHPPT    | -1.312398               |
| AASS        | -6.036329               |
| AATF        | -1.2167044              |
| AB124611    | -1.1651459              |
| ABAT        | -6.8610454              |
| ABCA1       | -1.5351415              |
| ABCA14      | -2.4935532              |
| ABCA15      | -1.798928               |
| ABCA16      | -2.496178               |
| ABCA2       | -2.1833105              |
| ABCA3       | -0.3679214              |
| ABCA6       | -6.989991               |
| ABCA8A      | -0.4063864              |
| ABCA8B      | -3.8745332              |
| ABCA9       | -0.54794                |
| ABCB10      | -1.0325403              |
| ABCB11      | -13.309639              |
| ABCB1A      | -1.0049424              |
| ABCB4       | -6.002287               |
| ABCB5       | -2.2847037              |
| ABCB6       | -4.2074585              |
| ABCB7       | -1.7845447              |
| ABCB8       | -2.0005746              |
| ABCC10      | -1.1799903              |

|         |            |
|---------|------------|
| ABCC12  | -2.0876913 |
| ABCC2   | -10.14431  |
| ABCC3   | -2.1922789 |
| ABCC6   | -11.013275 |
| ABCC9   | -1.7107382 |
| ABCD1   | -2.2327662 |
| ABCD2   | -3.3008637 |
| ABCD3   | -3.275691  |
| ABCD4   | -1.7991915 |
| ABCF1   | -0.3295598 |
| ABCF2   | -0.8208404 |
| ABCF3   | -1.0222206 |
| ABCG2   | -2.94903   |
| ABCG3   | -1.5342698 |
| ABCG5   | -11.504021 |
| ABCG8   | -7.3508415 |
| ABHD1   | -4.1353946 |
| ABHD11  | -2.0741086 |
| ABHD12  | -0.8912082 |
| ABHD14A | -0.903573  |
| ABHD14B | -3.6559434 |
| ABHD15  | -4.106105  |
| ABHD16A | -1.8039665 |
| ABHD17A | -2.54804   |
| ABHD17C | -0.7275972 |
| ABHD2   | -1.1938219 |
| ABHD4   | -0.9474478 |
| ABHD6   | -3.5043247 |
| ABHD8   | -0.9643889 |
| ABL1    | -0.2677641 |
| ABO     | -2.226998  |
| ABRA    | -1.6979313 |
| ABT1    | -0.6824117 |
| ABTB1   | -0.6403608 |
| ACAA1A  | -2.4737864 |
| ACAA1B  | -6.1538754 |
| ACAA2   | -4.293739  |
| ACACA   | -2.3214831 |
| ACACB   | -5.0091662 |
| ACAD10  | -3.4625359 |
| ACAD11  | -4.9063115 |
| ACAD12  | -2.8174443 |
| ACAD8   | -0.9096601 |
| ACAD9   | -2.0155315 |
| ACADL   | -1.9374795 |



|        |            |
|--------|------------|
| ACADM  | -3.7630682 |
| ACADS  | -5.6085854 |
| ACADSB | -0.5729194 |
| ACADVL | -3.5079718 |
| ACAT1  | -4.0640054 |
| ACAT2  | -4.9434137 |
| ACAT3  | -5.6160793 |
| ACBD4  | -2.7411814 |
| ACBD5  | -1.8151002 |
| ACBD6  | -2.2658758 |
| ACCS   | -1.6891618 |
| ACCSL  | -2.0758815 |
| ACD    | -0.3786149 |
| ACE3   | -2.166792  |
| ACHE   | -1.4569798 |
| ACLY   | -2.8386254 |
| ACMSD  | -7.081786  |
| ACN9   | -1.7450922 |
| ACNAT1 | -6.41283   |
| ACNAT2 | -10.691735 |
| ACO1   | -3.1575873 |
| ACO2   | -1.89467   |
| ACOT1  | -0.7899079 |
| ACOT12 | -10.854857 |
| ACOT13 | -2.838098  |
| ACOT3  | -7.961916  |
| ACOT4  | -8.847908  |
| ACOT5  | -1.8399417 |
| ACOT6  | -2.3992722 |
| ACOT8  | -2.0753183 |
| ACOX1  | -4.867726  |
| ACOX2  | -6.2259827 |
| ACP1   | -1.6148272 |
| ACP2   | -1.1941986 |
| ACP5   | -2.3453403 |
| ACP6   | -2.5745778 |
| ACPT   | -2.8131578 |
| ACRV1  | -2.014029  |
| ACSBG2 | -2.326975  |
| ACSF2  | -0.5798245 |
| ACSF3  | -2.952835  |
| ACSL1  | -4.271555  |
| ACSL3  | -1.7706141 |
| ACSL5  | -2.6585016 |
| ACSM1  | -5.116926  |

|          |            |
|----------|------------|
| ACSM2    | -2.092701  |
| ACSM3    | -7.090167  |
| ACSM4    | -2.1598508 |
| ACSM5    | -9.500113  |
| ACSS2    | -5.092682  |
| ACSS3    | -1.6627524 |
| ACTB     | -0.252708  |
| ACTBL2   | -2.089941  |
| ACTL10   | -3.6825092 |
| ACTL6A   | -0.7716241 |
| ACTL6B   | -2.1206217 |
| ACTL7A   | -0.9860227 |
| ACTL9    | -2.3603473 |
| ACTN4    | -0.277051  |
| ACTR10   | -0.7939367 |
| ACTR1B   | -1.3601813 |
| ACTR2    | -0.2035017 |
| ACTR5    | -0.5446258 |
| ACTR6    | -1.6474323 |
| ACTR8    | -1.2942047 |
| ACTRT1   | -2.0640497 |
| ACY1     | -5.223765  |
| ACY3     | -5.5381722 |
| ACYP1    | -1.6780114 |
| ACYP2    | -2.2527487 |
| ADAD1    | -1.9246259 |
| ADAD2    | -3.7105653 |
| ADAL     | -1.714119  |
| ADAM11   | -1.4889913 |
| ADAM12   | -0.9341488 |
| ADAM1B   | -2.2309875 |
| ADAM2    | -1.7711849 |
| ADAM20   | -2.1138732 |
| ADAM23   | -3.4894679 |
| ADAM25   | -1.9822187 |
| ADAM26A  | -1.5786064 |
| ADAM29   | -2.0890667 |
| ADAM30   | -1.7087982 |
| ADAM32   | -2.5707266 |
| ADAM34   | -2.158697  |
| ADAM39   | -2.2246778 |
| ADAM6A   | -2.2445006 |
| ADAM7    | -1.9412832 |
| ADAMDEC1 | -2.6396365 |
| ADAMTS13 | -4.5482674 |

|          |            |
|----------|------------|
| ADAMTS16 | -1.8499622 |
| ADAMTS20 | -4.07976   |
| ADAMTS7  | -5.139226  |
| ADAP2    | -0.8056936 |
| ADARB2   | -2.8363612 |
| ADAT2    | -0.9759097 |
| ADAT3    | -0.5994096 |
| ADCK1    | -1.8698258 |
| ADCK2    | -1.4626894 |
| ADCK3    | -6.0449896 |
| ADCK4    | -1.2899342 |
| ADCK5    | -2.1597085 |
| ADCY10   | -2.1046064 |
| ADCY6    | -0.5396233 |
| ADCY9    | -1.3180575 |
| ADCYAP1  | -2.363018  |
| ADH1     | -6.986104  |
| ADH4     | -10.89953  |
| ADH5     | -3.3389883 |
| ADH6A    | -1.4829826 |
| ADH7     | -1.4132009 |
| ADHFE1   | -4.7114286 |
| ADI1     | -2.6878638 |
| ADIPOR1  | -0.8044252 |
| ADIPOR2  | -1.9004602 |
| ADK      | -4.0611844 |
| ADM2     | -1.6605582 |
| ADO      | -0.4975262 |
| ADORA1   | -2.974267  |
| ADPRHL2  | -1.817297  |
| ADPRM    | -0.7010427 |
| ADRA1A   | -1.2207994 |
| ADRA1B   | -3.3065972 |
| ADRA1D   | -0.700393  |
| ADRA2A   | -1.5152068 |
| ADRA2B   | -2.6283364 |
| ADRM1    | -1.174933  |
| ADSL     | -0.7141938 |
| ADSS     | -0.4208193 |
| ADSSL1   | -1.7421937 |
| ADTRP    | -5.283735  |
| AEN      | -0.6972551 |
| AES      | -1.5409579 |
| AFF2     | -1.5172911 |
| AFG3L1   | -2.1797385 |

|        |            |
|--------|------------|
| AFG3L2 | -2.3145742 |
| AFM    | -14.867827 |
| AFMID  | -6.5593014 |
| AFP    | -2.035723  |
| AGA    | -0.7057724 |
| AGBL1  | -2.2465804 |
| AGBL3  | -0.6884949 |
| AGBL4  | -0.6494138 |
| AGFG2  | -1.3061166 |
| AGK    | -0.370378  |
| AGL    | -2.0331993 |
| AGMAT  | -9.185667  |
| AGMO   | -4.0214124 |
| AGPAT2 | -4.475039  |
| AGPAT3 | -2.4561129 |
| AGPAT6 | -2.0042553 |
| AGPAT9 | -2.1275096 |
| AGT    | -9.407713  |
| AGTR1A | -3.4868255 |
| AGTR1B | -2.2018514 |
| AGTR2  | -2.4283214 |
| AGXT   | -14.140779 |
| AGXT2  | -10.242956 |
| AHCTF1 | -0.4574661 |
| AHCY   | -6.0869937 |
| AHCYL1 | -1.38236   |
| AHR    | -1.6380043 |
| AHRR   | -2.5301244 |
| AHSA1  | -0.3085585 |
| AHSG   | -11.353382 |
| AIF1   | -1.4380975 |
| AIFM1  | -2.7241426 |
| AIFM2  | -2.6927238 |
| AIFM3  | -2.5084043 |
| AIG1   | -1.5668883 |
| AIM1   | -0.6732388 |
| AIM1L  | -1.4789836 |
| AIMP1  | -0.685811  |
| AIMP2  | -0.5833483 |
| AIP    | -0.4166875 |
| AIRE   | -0.4196343 |
| AK2    | -2.419765  |
| AK3    | -3.2243052 |
| AK4    | -6.2751884 |
| AKAP1  | -3.1875243 |

|          |            |
|----------|------------|
| AKAP17B  | -0.7599621 |
| AKAP4    | -1.6317413 |
| AKAP8L   | -0.6531816 |
| AKIP1    | -1.3366027 |
| AKR1A1   | -1.5911136 |
| AKR1B10  | -0.4845815 |
| AKR1B7   | -7.0724344 |
| AKR1C12  | -7.360159  |
| AKR1C13  | -5.3682814 |
| AKR1C14  | -1.4554858 |
| AKR1C18  | -8.293886  |
| AKR1C19  | -7.3270974 |
| AKR1C20  | -11.86227  |
| AKR1C21  | -2.0782824 |
| AKR1C6   | -13.391624 |
| AKR1CL   | -2.1202557 |
| AKR1D1   | -9.199589  |
| AKR1E1   | -2.2293289 |
| AKR7A5   | -4.7883673 |
| AKT1     | -0.4571014 |
| AKT1S1   | -2.0615094 |
| AKT2     | -0.9488912 |
| ALAD     | -3.979045  |
| ALAS1    | -1.6460686 |
| ALB      | -11.30703  |
| ALDH16A1 | -2.4344382 |
| ALDH18A1 | -0.2915041 |
| ALDH1A1  | -0.6410604 |
| ALDH1A7  | -1.122325  |
| ALDH1B1  | -6.783326  |
| ALDH1L1  | -6.809845  |
| ALDH2    | -2.7970967 |
| ALDH3A2  | -2.040347  |
| ALDH4A1  | -5.4132404 |
| ALDH5A1  | -4.3133616 |
| ALDH6A1  | -3.3701577 |
| ALDH7A1  | -4.4610963 |
| ALDH8A1  | -9.735807  |
| ALDH9A1  | -3.9985595 |
| ALDOART1 | -2.0757823 |
| ALDOB    | -14.093827 |
| ALDOC    | -2.4989314 |
| ALG1     | -0.2808924 |
| ALG13    | -0.8322864 |
| ALG14    | -1.1578689 |

|          |            |
|----------|------------|
| ALG2     | -0.6013641 |
| ALG3     | -2.06679   |
| ALG5     | -2.404819  |
| ALG6     | -2.1802351 |
| ALG8     | -1.4443767 |
| ALG9     | -1.4975567 |
| ALK      | -2.3430316 |
| ALKBH2   | -2.0805078 |
| ALKBH3   | -1.2034826 |
| ALKBH4   | -0.5429311 |
| ALKBH5   | -0.6960287 |
| ALKBH6   | -0.3835473 |
| ALKBH7   | -2.0410953 |
| ALLC     | -2.070932  |
| ALOX12B  | -0.5467179 |
| ALOX8    | -2.1757193 |
| ALPI     | -2.0355175 |
| ALPK2    | -2.272282  |
| ALPL     | -1.174027  |
| ALS2     | -2.016651  |
| ALS2CL   | -0.6081452 |
| ALS2CR11 | -2.125108  |
| ALX1     | -2.2715356 |
| ALX4     | -1.0264318 |
| AMACR    | -5.4005837 |
| AMBN     | -2.1196272 |
| AMBP     | -9.441347  |
| AMBRA1   | -0.4969754 |
| AMD2     | -0.2883258 |
| AMDHD1   | -10.044319 |
| AMDHD2   | -1.3002057 |
| AMELX    | -2.0924494 |
| AMER2    | -1.9753039 |
| AMFR     | -1.6132526 |
| AMH      | -1.5381241 |
| AMIGO1   | -0.9192653 |
| AMIGO2   | -1.239548  |
| AMMECR1L | -0.8995895 |
| AMN      | -2.7063618 |
| AMOT     | -2.1559439 |
| AMPD2    | -1.3388395 |
| AMT      | -4.1398044 |
| AMTN     | -2.011379  |
| AMY1     | -7.1803455 |
| AMY2A4   | -2.265697  |

|          |            |
|----------|------------|
| AMY2A5   | -6.7712336 |
| AMZ2     | -0.4338117 |
| ANAPC1   | -0.3651104 |
| ANAPC13  | -1.2587004 |
| ANAPC15  | -0.3126917 |
| ANAPC16  | -0.4859386 |
| ANAPC4   | -0.2636533 |
| ANAPC5   | -0.6531181 |
| ANAPC7   | -1.2596793 |
| ANG      | -5.1954813 |
| ANG2     | -5.252739  |
| ANG3     | -1.0234084 |
| ANG4     | -4.406863  |
| ANGEL1   | -1.531734  |
| ANGEL2   | -0.2059059 |
| ANGPTL1  | -0.7814949 |
| ANGPTL3  | -10.658822 |
| ANGPTL4  | -0.2022672 |
| ANGPTL6  | -5.308263  |
| ANK      | -2.3227444 |
| ANK2     | -0.1636839 |
| ANKAR    | -2.3203213 |
| ANKDD1A  | -1.9626613 |
| ANKDD1B  | -2.0509217 |
| ANKLE1   | -1.1106961 |
| ANKMY1   | -0.766393  |
| ANKMY2   | -1.03001   |
| ANKRD13B | -0.9931054 |
| ANKRD13C | -0.2371006 |
| ANKRD2   | -0.4706078 |
| ANKRD24  | -2.7928247 |
| ANKRD27  | -0.2520771 |
| ANKRD28  | -0.6700869 |
| ANKRD33  | -1.2152898 |
| ANKRD34B | -2.1755211 |
| ANKRD34C | -2.2895646 |
| ANKRD36  | -2.1929147 |
| ANKRD39  | -1.0426745 |
| ANKRD46  | -1.086782  |
| ANKRD52  | -0.4870515 |
| ANKRD54  | -0.6440446 |
| ANKRD55  | -1.5743821 |
| ANKRD60  | -0.4605522 |
| ANKRD9   | -0.8058944 |
| ANKS1B   | -1.76684   |

|        |            |
|--------|------------|
| ANKS3  | -0.4387491 |
| ANKS4B | -5.813467  |
| ANKUB1 | -0.8842807 |
| ANKZF1 | -1.3681331 |
| ANO10  | -0.7559576 |
| ANO3   | -1.9316797 |
| ANO5   | -2.2382581 |
| ANO7   | -2.3183055 |
| ANO8   | -0.3921535 |
| ANP32A | -1.5859828 |
| ANPEP  | -2.3413453 |
| ANTXR2 | -0.2938619 |
| ANXA10 | -2.2921674 |
| ANXA13 | -2.2161357 |
| ANXA6  | -0.8334456 |
| ANXA7  | -0.4603739 |
| AOAH   | -0.3371637 |
| AOX1   | -1.7402987 |
| AOX2   | -1.9572678 |
| AOX3   | -1.7629223 |
| AOX4   | -2.0132923 |
| AP1AR  | -0.4285188 |
| AP1B1  | -1.1631694 |
| AP1G1  | -0.5700193 |
| AP1M1  | -0.6659713 |
| AP1S1  | -1.1377788 |
| AP2A1  | -0.7200828 |
| AP2A2  | -0.9504905 |
| AP2B1  | -0.673686  |
| AP2M1  | -1.3119235 |
| AP2S1  | -1.2386961 |
| AP3D1  | -0.2230215 |
| AP3M1  | -2.077464  |
| AP3S1  | -0.1990705 |
| AP3S2  | -0.7283988 |
| AP4B1  | -1.2665286 |
| AP4M1  | -0.650486  |
| AP5M1  | -0.4756985 |
| AP5S1  | -2.2292628 |
| APBA3  | -1.9734373 |
| APBB3  | -1.1270089 |
| APC    | -1.1168983 |
| APCS   | -12.718416 |
| APEH   | -1.9209871 |
| APELA  | -0.915225  |



|         |            |
|---------|------------|
| APEX1   | -2.1285143 |
| APH1A   | -1.4146476 |
| API5    | -0.416687  |
| APIP    | -0.754477  |
| APLP2   | -0.4926748 |
| APMAP   | -1.479095  |
| APOA1   | -15.063332 |
| APOA1BP | -1.7764707 |
| APOA2   | -6.9850574 |
| APOA4   | -10.10235  |
| APOA5   | -10.828673 |
| APOB    | -9.749285  |
| APOBEC1 | -0.6723561 |
| APOBEC3 | -0.3069058 |
| APOC1   | -4.765407  |
| APOC2   | -7.155035  |
| APOC3   | -11.485372 |
| APOC4   | -14.223697 |
| APOE    | -3.8837824 |
| APOF    | -13.646185 |
| APOH    | -13.819852 |
| APOL10A | -1.3176134 |
| APOL7A  | -8.016025  |
| APOL7C  | -3.6246715 |
| APOL7D  | -2.1051474 |
| APOL8   | -1.5285244 |
| APOL9A  | -4.8123975 |
| APOL9B  | -4.6296744 |
| APOM    | -12.868542 |
| APON    | -11.680189 |
| APOO    | -1.7688694 |
| APOOL   | -1.6003976 |
| APOPT1  | -0.8583922 |
| APRT    | -1.2989192 |
| AQP1    | -0.6727085 |
| AQP11   | -7.549788  |
| AQP12   | -1.1802406 |
| AQP2    | -0.2657881 |
| AQP6    | -2.0328236 |
| AQP8    | -12.32449  |
| AQP9    | -7.170496  |
| ARAF    | -1.2595987 |
| ARAP1   | -1.0210962 |
| ARCN1   | -0.4359193 |
| AREL1   | -1.0630622 |

|           |            |
|-----------|------------|
| ARF1      | -0.8303409 |
| ARF4      | -0.9492588 |
| ARF5      | -1.1881518 |
| ARF6      | -0.8437572 |
| ARFGAP1   | -0.5224743 |
| ARFGAP2   | -2.2477398 |
| ARFGEF2   | -0.9574928 |
| ARFIP1    | -0.2669618 |
| ARFRP1    | -0.2595024 |
| ARG1      | -11.39661  |
| ARHGAP1   | -0.3015027 |
| ARHGAP19  | -1.2247834 |
| ARHGAP20  | -2.0215058 |
| ARHGAP21  | -0.4029245 |
| ARHGAP24  | -1.1673298 |
| ARHGAP26  | -0.465055  |
| ARHGAP35  | -0.870966  |
| ARHGAP36  | -1.5653815 |
| ARHGAP42  | -1.0818594 |
| ARHGAP5   | -0.4345694 |
| ARHGEF10  | -0.982615  |
| ARHGEF10L | -0.9869986 |
| ARHGEF15  | -1.6750484 |
| ARHGEF16  | -0.8120418 |
| ARHGEF18  | -0.4002724 |
| ARHGEF19  | -4.439184  |
| ARHGEF37  | -1.2078507 |
| ARHGEF39  | -1.0536985 |
| ARHGEF40  | -0.8035274 |
| ARHGEF9   | -1.9350796 |
| ARID3C    | -1.754497  |
| ARIH2     | -1.0093684 |
| ARL1      | -0.8724499 |
| ARL13A    | -1.5218389 |
| ARL14EPL  | -3.1990788 |
| ARL4A     | -0.7268438 |
| ARL4AOS   | -2.2884722 |
| ARL4C     | -0.3883371 |
| ARL4D     | -0.9516282 |
| ARL5A     | -1.3450704 |
| ARL6IP4   | -0.9648337 |
| ARL6IP6   | -1.3112073 |
| ARL8B     | -0.2840447 |
| ARL9      | -1.5526583 |
| ARMC1     | -1.3064756 |

|          |            |
|----------|------------|
| ARMC12   | -2.7631373 |
| ARMC6    | -0.8297062 |
| ARMC8    | -0.3839541 |
| ARMC9    | -2.1669428 |
| ARMCX5   | -0.5491443 |
| ARNT     | -0.3282538 |
| ARNTL    | -0.4114771 |
| ARNTL2   | -0.7736294 |
| ARPC1A   | -0.5648828 |
| ARPC3    | -0.2813611 |
| ARPC4    | -1.0779223 |
| ARPC5L   | -0.6006661 |
| ARPP21   | -1.3972666 |
| ARSB     | -0.4409761 |
| ARSG     | -2.8386207 |
| ARSK     | -0.9607878 |
| ART2A-PS | -5.990324  |
| ARV1     | -0.6850045 |
| ARVCF    | -1.8968391 |
| ARX      | -2.1528044 |
| AS3MT    | -3.0162497 |
| ASAH1    | -0.6743107 |
| ASAH2    | -0.8855045 |
| ASAP3    | -0.3084903 |
| ASB12    | -2.053315  |
| ASB13    | -1.9752474 |
| ASB15    | -2.259184  |
| ASB16    | -2.6504774 |
| ASB17    | -2.1391938 |
| ASB18    | -1.5364733 |
| ASB8     | -0.8921208 |
| ASCC1    | -1.3178759 |
| ASGR1    | -9.002436  |
| ASGR2    | -8.747219  |
| ASH2L    | -0.1515307 |
| ASIC2    | -2.2292838 |
| ASIC4    | -0.7773817 |
| ASL      | -6.18895   |
| ASNA1    | -0.1525345 |
| ASNSD1   | -1.2731671 |
| ASPA     | -3.4045722 |
| ASPDH    | -4.6360955 |
| ASPG     | -4.940985  |
| ASPM     | -0.5497971 |
| ASPSCR1  | -2.305139  |

|          |            |
|----------|------------|
| ASS1     | -5.205804  |
| ASTE1    | -1.8549981 |
| ASTN2    | -0.6280673 |
| ASXL3    | -1.4860861 |
| ASZ1     | -1.9991026 |
| ATAD1    | -0.4716134 |
| ATAD3A   | -2.4464998 |
| ATAD3AOS | -2.6337707 |
| ATAT1    | -1.0140014 |
| ATCAY    | -1.9166753 |
| ATCAYOS  | -1.521327  |
| ATE1     | -0.3912025 |
| ATF1     | -0.6130076 |
| ATF5     | -3.1948829 |
| ATF6B    | -0.6813655 |
| ATF7IP2  | -2.2117434 |
| ATG10    | -0.3731096 |
| ATG101   | -1.580625  |
| ATG12    | -0.4182811 |
| ATG13    | -0.5663557 |
| ATG14    | -0.7290454 |
| ATG16L1  | -0.9812827 |
| ATG16L2  | -0.6239281 |
| ATG2A    | -2.2245555 |
| ATG2B    | -0.7628748 |
| ATG3     | -0.53373   |
| ATG4A    | -1.7818213 |
| ATG4B    | -1.664135  |
| ATG4C    | -2.1538234 |
| ATG4D    | -1.3659458 |
| ATG5     | -2.2823882 |
| ATG7     | -1.2043619 |
| ATG9B    | -0.7983308 |
| ATHL1    | -1.553401  |
| ATIC     | -1.1150241 |
| ATL2     | -2.7117157 |
| ATM      | -0.2833917 |
| ATOH1    | -2.106205  |
| ATOH7    | -3.7507486 |
| ATOH8    | -1.3660922 |
| ATOX1    | -1.7269158 |
| ATP10B   | -1.8880534 |
| ATP11B   | -0.5809245 |
| ATP11C   | -2.8417988 |
| ATP12A   | -1.0610511 |

|           |            |
|-----------|------------|
| ATP13A1   | -1.2259073 |
| ATP13A2   | -1.1049051 |
| ATP13A5   | -1.4584007 |
| ATP1A1    | -0.7480478 |
| ATP1B3    | -0.2803378 |
| ATP1B4    | -2.0970113 |
| ATP2B2    | -2.4133224 |
| ATP2B3    | -1.9914048 |
| ATP4A     | -2.322646  |
| ATP4B     | -1.9213839 |
| ATP5A1    | -1.8401251 |
| ATP5B     | -2.0634532 |
| ATP5C1    | -2.5999737 |
| ATP5C1-PS | -1.9066348 |
| ATP5D     | -3.0046983 |
| ATP5E     | -1.9901028 |
| ATP5F1    | -1.9943008 |
| ATP5G1    | -2.691863  |
| ATP5G2    | -1.4842987 |
| ATP5G3    | -2.240652  |
| ATP5H     | -1.4369488 |
| ATP5J     | -1.8743229 |
| ATP5J2    | -1.9802179 |
| ATP5K     | -2.1863575 |
| ATP5L     | -1.6394272 |
| ATP5O     | -1.9573889 |
| ATP5S     | -1.3123441 |
| ATP5SL    | -2.1884775 |
| ATP6      | -2.2424197 |
| ATP6AP1L  | -1.9554148 |
| ATP6V0A1  | -0.1905952 |
| ATP6V0B   | -1.4915876 |
| ATP6V0C   | -1.0554256 |
| ATP6V0D1  | -0.9902496 |
| ATP6V1C1  | -0.2558899 |
| ATP6V1D   | -0.654582  |
| ATP6V1E1  | -1.6673999 |
| ATP6V1E2  | -0.8772154 |
| ATP6V1F   | -0.7568269 |
| ATP6V1G3  | -1.6338692 |
| ATP6V1H   | -0.6525822 |
| ATP8      | -2.4253254 |
| ATP8B1    | -1.7127657 |
| ATP8B2    | -2.2485917 |
| ATP8B3    | -0.6113305 |

|          |            |
|----------|------------|
| ATP8B5   | -0.9291327 |
| ATP9A    | -0.921824  |
| ATPAF2   | -1.9872794 |
| ATPIF1   | -0.8430858 |
| ATRAID   | -2.3149247 |
| ATRIP    | -1.0232162 |
| ATRN     | -0.8318467 |
| ATXN10   | -0.2929916 |
| ATXN2    | -1.0817637 |
| ATXN3    | -0.4722803 |
| ATXN7    | -1.4097395 |
| ATXN7L3B | -1.0377421 |
| AUH      | -1.7571812 |
| AUP1     | -1.9260483 |
| AURKA    | -1.1352034 |
| AURKAIP1 | -1.3150883 |
| AURKB    | -2.2544742 |
| AVEN     | -1.2195811 |
| AVP      | -2.456004  |
| AVPI1    | -1.4048214 |
| AVPR1A   | -7.271783  |
| AVPR1B   | -1.703824  |
| AXL      | -0.8681684 |
| AZGP1    | -10.090959 |
| B2M      | -1.2868428 |
| B3GALT1  | -4.1492043 |
| B3GALT4  | -0.2094784 |
| B3GALT5  | -1.1186116 |
| B3GALT6  | -0.2794538 |
| B3GAT1   | -2.008205  |
| B3GAT3   | -1.102879  |
| B3GNT1   | -1.3978872 |
| B3GNT8   | -0.3888841 |
| B3GNTL1  | -1.3288355 |
| B4GALNT1 | -0.6821609 |
| B4GALNT3 | -1.6561284 |
| B4GALNT4 | -0.8401179 |
| B4GALT7  | -0.4996114 |
| BAALC    | -2.2325768 |
| BAAT     | -9.492987  |
| BABAM1   | -1.3339243 |
| BACE1    | -1.5894456 |
| BAD      | -1.1330762 |
| BAG1     | -0.339869  |
| BAG4     | -1.9519303 |

|          |            |
|----------|------------|
| BAG5     | -0.1965108 |
| BAG6     | -0.7531366 |
| BAHCC1   | -2.1145337 |
| BAI1     | -1.1638865 |
| BAIAP2   | -1.1236973 |
| BAIAP2L1 | -1.322753  |
| BAIAP3   | -1.3998849 |
| BAMBI    | -2.1184416 |
| BANF1    | -1.3409028 |
| BANF2    | -2.4299226 |
| BANK1    | -1.2890697 |
| BANP     | -1.1495991 |
| BAP1     | -1.1020699 |
| BARHL2   | -1.9078045 |
| BARX1    | -1.899591  |
| BATF3    | -1.5141182 |
| BAZ2A    | -0.39396   |
| BBC3     | -1.1407928 |
| BBOX1    | -7.794569  |
| BBS10    | -2.941379  |
| BBS5     | -1.4381833 |
| BBS7     | -0.6341021 |
| BC025920 | -0.979106  |
| BCAP29   | -0.4375515 |
| BCAP31   | -1.7265425 |
| BCAS1OS2 | -1.7092607 |
| BCAS2    | -0.702693  |
| BCAS3    | -0.5840292 |
| BCAT2    | -0.9513087 |
| BCCIP    | -1.3382058 |
| BCDIN3D  | -0.994411  |
| BCHE     | -6.1017017 |
| BCKDHA   | -4.638197  |
| BCKDHB   | -4.1714454 |
| BCKDK    | -0.8327251 |
| BCL2L12  | -1.5362949 |
| BCL2L13  | -1.2261953 |
| BCL7A    | -0.3849948 |
| BCL7C    | -0.4205074 |
| BCL9L    | -1.1151361 |
| BCMO1    | -5.2468553 |
| BCO2     | -4.7519827 |
| BCORL1   | -0.6401041 |
| BCS1L    | -1.8061237 |
| BDH1     | -7.6888514 |

|         |            |
|---------|------------|
| BDH2    | -4.4828773 |
| BECN2   | -2.0079327 |
| BEND3   | -0.3390074 |
| BEND6   | -0.2621663 |
| BEST1   | -2.1232858 |
| BEST3   | -1.5296371 |
| BET1    | -1.4578652 |
| BET1L   | -0.2293797 |
| BEX6    | -1.2175674 |
| BGLAP   | -3.406914  |
| BGLAP2  | -1.4640732 |
| BGLAP3  | -1.7586584 |
| BHLHA9  | -0.9952493 |
| BHLHE23 | -1.045712  |
| BHLHE40 | -0.951478  |
| BHMT    | -14.096851 |
| BHMT2   | -12.809559 |
| BID     | -0.6597877 |
| BIN3    | -0.2241554 |
| BIRC5   | -0.5180049 |
| BIRC6   | -0.3879385 |
| BIVM    | -1.6311498 |
| BLCAP   | -1.4557457 |
| BLK     | -1.916945  |
| BLM     | -0.6522675 |
| BLMH    | -0.918457  |
| BLOC1S1 | -1.2506251 |
| BLOC1S2 | -1.3259759 |
| BLOC1S3 | -0.8456652 |
| BLOC1S4 | -0.6257958 |
| BLOC1S5 | -2.7377071 |
| BLOC1S6 | -0.2778845 |
| BLVRA   | -0.754549  |
| BLVRB   | -3.4884138 |
| BMP1    | -2.4215136 |
| BMP10   | -2.258269  |
| BMP15   | -2.0257971 |
| BMP2    | -2.961372  |
| BMP7    | -0.8863125 |
| BMP8B   | -1.49259   |
| BNIP1   | -2.2410307 |
| BNIP3   | -1.8822846 |
| BOD1    | -1.2999692 |
| BOK     | -1.1157508 |
| BOLA1   | -0.5972066 |



|         |            |
|---------|------------|
| BOLA2   | -0.8410459 |
| BOLA3   | -2.157539  |
| BOLL    | -0.7626009 |
| BOP1    | -0.7846127 |
| BPGM    | -0.6759753 |
| BPHL    | -3.7547417 |
| BPI     | -2.07131   |
| BPIFA2  | -2.1718032 |
| BPIFA3  | -1.3151271 |
| BPIFA6  | -1.9146376 |
| BPIFB2  | -1.1509933 |
| BPIFB3  | -2.1164143 |
| BPIFB9B | -3.962109  |
| BPIFC   | -1.1344228 |
| BPNT1   | -1.8787174 |
| BRAP    | -2.1021948 |
| BRAT1   | -0.7213798 |
| BRCA1   | -2.5511136 |
| BRCA2   | -1.2941027 |
| BRCC3   | -0.4028039 |
| BRD3    | -1.2098103 |
| BRE     | -0.7095485 |
| BRF1    | -0.2372532 |
| BRF2    | -1.0542526 |
| BRI3    | -0.5922251 |
| BRI3BP  | -1.6666465 |
| BRICD5  | -1.4550841 |
| BRINP2  | -2.185319  |
| BRINP3  | -2.355568  |
| BRIP1   | -0.798415  |
| BRIP1OS | -2.1757061 |
| BRK1    | -0.7548385 |
| BRMS1   | -1.031579  |
| BRS3    | -1.9902008 |
| BSCL2   | -2.010933  |
| BSDC1   | -0.8768802 |
| BSG     | -1.9671955 |
| BSN     | -0.3513315 |
| BSPH1   | -0.7182457 |
| BST2    | -1.2089496 |
| BSX     | -2.1862662 |
| BTBD16  | -0.5626555 |
| BTBD2   | -1.484251  |
| BTBD6   | -1.9771657 |
| BTBD8   | -1.3887501 |

|           |            |
|-----------|------------|
| BTBD9     | -0.462482  |
| BTC       | -1.3703423 |
| BTD       | -3.3889875 |
| BTF3L4    | -0.5105214 |
| BTG4      | -2.1417139 |
| BTN1A1    | -1.8645554 |
| BTN2A2    | -2.0758774 |
| BTNL1     | -2.0843792 |
| BTNL2     | -4.269161  |
| BTNL4     | -2.0309181 |
| BUB1B     | -0.5095618 |
| BUD31     | -0.3919563 |
| BYSL      | -0.5238595 |
| BZW1      | -0.4026923 |
| C1GALT1C1 | -0.3881555 |
| C1QA      | -2.3300638 |
| C1QB      | -2.2579298 |
| C1QBP     | -1.5704875 |
| C1QC      | -2.653265  |
| C1QL3     | -4.5013123 |
| C1QTNF1   | -1.4000764 |
| C1QTNF9   | -2.0791447 |
| C1RA      | -1.8811741 |
| C1RB      | -1.459105  |
| C1RL      | -4.007403  |
| C1S1      | -1.8921156 |
| C1S2      | -1.7225461 |
| C2        | -2.9133568 |
| C2CD2     | -2.5562074 |
| C2CD2L    | -1.8373837 |
| C2CD4D    | -2.5190868 |
| C3        | -2.1411357 |
| C4B       | -3.180214  |
| C4BP      | -12.319572 |
| C5AR2     | -1.2354064 |
| C6        | -1.1189003 |
| C8A       | -10.873709 |
| C8B       | -10.797932 |
| C8G       | -10.054869 |
| C9        | -8.941826  |
| CAB39L    | -1.8400984 |
| CABIN1    | -0.3831439 |
| CABLES2   | -1.8030486 |
| CABP2     | -1.6219854 |
| CABP4     | -0.6095519 |

|         |            |
|---------|------------|
| CABP7   | -2.2486877 |
| CABS1   | -2.1173599 |
| CABYR   | -0.7094395 |
| CACFD1  | -1.6464677 |
| CACNA1A | -0.9821613 |
| CACNA1B | -3.8505638 |
| CACNA1E | -2.1808026 |
| CACNA1F | -0.9996076 |
| CACNB4  | -1.5552804 |
| CACNG1  | -1.9611881 |
| CACNG2  | -1.4702523 |
| CACNG3  | -1.7075732 |
| CACNG4  | -0.8627639 |
| CACNG5  | -2.2013202 |
| CACNG7  | -3.8679912 |
| CACNG8  | -2.2921903 |
| CADM3   | -3.7046542 |
| CAGE1   | -0.7522571 |
| CALB1   | -1.5257843 |
| CALB2   | -2.5660958 |
| CALCB   | -1.721581  |
| CALD1   | -1.0636134 |
| CALHM1  | -0.9649303 |
| CALHM2  | -0.5630603 |
| CALM2   | -0.2233963 |
| CALM5   | -2.1975422 |
| CALML4  | -1.3678727 |
| CALN1   | -0.4112411 |
| CALR    | -1.1685467 |
| CALR3   | -2.7988796 |
| CALU    | -0.3031783 |
| CAMK1   | -0.6316247 |
| CAMK1D  | -3.3231554 |
| CAMK2N1 | -0.4204497 |
| CAMK2N2 | -0.5314841 |
| CAML    | -0.6758671 |
| CAMSAP3 | -0.9139824 |
| CAND1   | -0.5241842 |
| CAND2   | -1.2318401 |
| CANX    | -0.3095756 |
| CAPN10  | -3.2387648 |
| CAPN12  | -1.7172067 |
| CAPN15  | -0.8574958 |
| CAPN5   | -0.7304726 |
| CAPN6   | -2.602324  |

|           |            |
|-----------|------------|
| CAPRIN1   | -0.9003325 |
| CAPZA1    | -0.8702989 |
| CAPZA3    | -1.6954236 |
| CAR1      | -3.4011548 |
| CAR10     | -1.8811178 |
| CAR11     | -1.1625698 |
| CAR14     | -5.2080317 |
| CAR2      | -0.6599536 |
| CAR3      | -4.9416485 |
| CAR5A     | -10.940637 |
| CAR6      | -3.2574291 |
| CAR7      | -2.9570088 |
| CARD10    | -1.4478879 |
| CARD14    | -1.3456154 |
| CARHSP1   | -0.3777118 |
| CARKD     | -0.9477577 |
| CARLR     | -2.2809687 |
| CARM1     | -1.1724396 |
| CARNS1    | -0.766722  |
| CARS      | -0.7726798 |
| CARS2     | -1.0460548 |
| CASKIN1   | -1.6536622 |
| CASP6     | -1.7149844 |
| CASP7     | -1.1235352 |
| CASP8     | -0.5433979 |
| CASP9     | -0.9044089 |
| CASR      | -2.2434695 |
| CAT       | -3.9614358 |
| CATSPER1  | -1.599226  |
| CATSPER2  | -1.8734374 |
| CATSPER3  | -1.4825068 |
| CATSPERB  | -2.1747644 |
| CATSPERD  | -2.2749856 |
| CATSPERG2 | -1.4705296 |
| CBLC      | -3.4790497 |
| CBLN1     | -1.7284567 |
| CBLN2     | -1.2687697 |
| CBLN4     | -2.1803808 |
| CBR1      | -4.1255307 |
| CBR4      | -2.8062596 |
| CBS       | -7.486018  |
| CBX2      | -3.2458367 |
| CBX3      | -0.2306929 |
| CBX4      | -0.5399809 |
| CBX7      | -0.9219999 |

|          |            |
|----------|------------|
| CBX8     | -3.11421   |
| CBY1     | -1.0197024 |
| CC2D1A   | -0.720798  |
| CC2D2B   | -1.6484287 |
| CCAR2    | -0.6517963 |
| CCBL1    | -3.8657537 |
| CCBL2    | -5.7512455 |
| CCDC101  | -0.2511706 |
| CCDC104  | -0.7495456 |
| CCDC106  | -1.0896065 |
| CCDC107  | -2.097056  |
| CCDC12   | -0.5706563 |
| CCDC124  | -0.7184072 |
| CCDC125  | -1.2116427 |
| CCDC137  | -0.5498366 |
| CCDC138  | -1.7894549 |
| CCDC142  | -1.057807  |
| CCDC148  | -2.0469975 |
| CCDC152  | -0.8403702 |
| CCDC154  | -0.3679352 |
| CCDC159  | -2.4564495 |
| CCDC162  | -2.174866  |
| CCDC166  | -2.2574096 |
| CCDC167  | -1.8691635 |
| CCDC171  | -0.8658042 |
| CCDC178  | -2.2356286 |
| CCDC18   | -0.4650829 |
| CCDC183  | -1.5018563 |
| CCDC22   | -0.6962938 |
| CCDC23   | -0.5463839 |
| CCDC25   | -1.2395363 |
| CCDC27   | -1.8742855 |
| CCDC28A  | -1.2270932 |
| CCDC28B  | -1.0132346 |
| CCDC3    | -2.5128152 |
| CCDC32   | -0.2967372 |
| CCDC34   | -0.3228018 |
| CCDC36   | -1.0165422 |
| CCDC38   | -2.1276915 |
| CCDC42OS | -2.5619667 |
| CCDC43   | -0.7473674 |
| CCDC47   | -0.460186  |
| CCDC51   | -1.80158   |
| CCDC53   | -0.8989949 |
| CCDC54   | -2.0675354 |

|          |            |
|----------|------------|
| CCDC57   | -0.2706008 |
| CCDC58   | -2.3850389 |
| CCDC60   | -0.525012  |
| CCDC7    | -2.4270718 |
| CCDC70   | -1.5340507 |
| CCDC71   | -0.9320235 |
| CCDC73   | -1.8838279 |
| CCDC74A  | -1.9650874 |
| CCDC79   | -0.9091654 |
| CCDC8    | -1.6205246 |
| CCDC80   | -0.9441524 |
| CCDC83   | -1.9448755 |
| CCDC84   | -0.4610872 |
| CCDC85C  | -0.6232657 |
| CCDC90B  | -0.584929  |
| CCDC91   | -0.5984359 |
| CCDC94   | -0.3157733 |
| CCDC97   | -0.5371304 |
| CCER1    | -1.9868684 |
| CCIN     | -3.6565466 |
| CCKBR    | -1.593384  |
| CCL20    | -2.372761  |
| CCL22    | -1.7142234 |
| CCL24    | -5.173886  |
| CCL25    | -0.808423  |
| CCL26    | -1.7533712 |
| CCL27A   | -0.85356   |
| CCL28    | -1.0390053 |
| CCL9     | -2.2414966 |
| CCM2     | -0.8273153 |
| CCNA2    | -0.8252721 |
| CCNB1    | -0.7928746 |
| CCNB1IP1 | -1.3292758 |
| CCNB2    | -0.4594431 |
| CCNB3    | -2.2177856 |
| CCNE1    | -1.2755094 |
| CCNE2    | -2.3685284 |
| CCNF     | -1.340447  |
| CCNH     | -1.1094508 |
| CCNI     | -0.6249809 |
| CCNL2    | -0.2978368 |
| CCNY     | -0.2088738 |
| CCR1     | -2.0660386 |
| CCR3     | -2.7266738 |
| CCS      | -3.7085152 |

|         |            |
|---------|------------|
| CCT2    | -0.5064383 |
| CCT3    | -0.5858183 |
| CCT5    | -0.416348  |
| CCT6A   | -0.4090438 |
| CCT6B   | -0.8290119 |
| CCT7    | -0.866869  |
| CCT8    | -0.3371167 |
| CCZ1    | -0.575295  |
| CD164   | -1.1480756 |
| CD180   | -1.2656684 |
| CD1D1   | -5.9054136 |
| CD1D2   | -5.934004  |
| CD200R1 | -0.4010408 |
| CD200R2 | -1.2853544 |
| CD200R3 | -1.1213665 |
| CD209B  | -0.679261  |
| CD22    | -1.28402   |
| CD248   | -0.4465442 |
| CD276   | -1.7441049 |
| CD2AP   | -0.6793447 |
| CD300A  | -0.2639341 |
| CD300E  | -2.4335713 |
| CD300LB | -1.5282197 |
| CD300LD | -1.9138403 |
| CD300LG | -1.2031593 |
| CD300LH | -1.2962723 |
| CD302   | -2.6918287 |
| CD320   | -0.8336434 |
| CD38    | -0.7381492 |
| CD4     | -3.4767103 |
| CD40LG  | -2.1099732 |
| CD59A   | -2.9285746 |
| CD59B   | -5.008132  |
| CD5L    | -8.776566  |
| CD68    | -0.2403617 |
| CD7     | -0.6588984 |
| CD74    | -0.8336225 |
| CD81    | -1.93184   |
| CD86    | -0.5462451 |
| CDA     | -6.5378246 |
| CDADC1  | -1.1627908 |
| CDC123  | -0.8394122 |
| CDC14B  | -2.151031  |
| CDC16   | -0.821465  |
| CDC20   | -1.3479285 |

|            |            |
|------------|------------|
| CDC25A     | -0.5942345 |
| CDC26      | -0.8497701 |
| CDC34      | -1.5437741 |
| CDC37      | -0.4982772 |
| CDC37L1    | -0.4190431 |
| CDCA2      | -0.6395683 |
| CDCA3      | -1.758338  |
| CDCA5      | -0.7521935 |
| CDCA7L     | -0.4980967 |
| CDCP2      | -6.8134413 |
| CDH17      | -1.684382  |
| CDH19      | -1.623101  |
| CDH2       | -4.777109  |
| CDH20      | -2.1066413 |
| CDH26      | -0.5051768 |
| CDH3       | -2.1428802 |
| CDH7       | -1.8337684 |
| CDH8       | -1.1921518 |
| CDH9       | -1.7912602 |
| CDHR2      | -1.2433405 |
| CDHR5      | -8.214988  |
| CDIP1      | -2.2839859 |
| CDIPT      | -0.4910779 |
| CDK1       | -1.251827  |
| CDK10      | -1.4157014 |
| CDK15      | -1.494719  |
| CDK16      | -0.8766012 |
| CDK18      | -1.8331962 |
| CDK20      | -1.6498332 |
| CDK2AP1    | -0.7158432 |
| CDK2AP2    | -0.8490653 |
| CDK4       | -0.4649243 |
| CDK5RAP1   | -1.4727278 |
| CDK5RAP3   | -2.406858  |
| CDK9       | -0.5096693 |
| CDKAL1     | -0.3800206 |
| CDKN2A     | -2.104287  |
| CDKN2AIP   | -0.5004931 |
| CDKN2AIPNL | -0.5550675 |
| CDKN2C     | -1.7295403 |
| CDO1       | -4.202666  |
| CDRT4      | -1.2810829 |
| CDRT4OS1   | -1.479784  |
| CDS2       | -1.6702156 |
| CDT1       | -0.7145667 |



|          |            |
|----------|------------|
| CDV3     | -0.7496972 |
| CDX1     | -1.9215877 |
| CDX2     | -2.170406  |
| CDX4     | -3.5663822 |
| CEACAM11 | -1.9585505 |
| CEACAM12 | -2.1602802 |
| CEACAM13 | -2.735763  |
| CEACAM14 | -1.9794958 |
| CEACAM15 | -2.0487688 |
| CEACAM19 | -2.3412404 |
| CEACAM2  | -0.9671836 |
| CEACAM20 | -0.7243049 |
| CEACAM3  | -1.1018701 |
| CEACAM5  | -1.6382306 |
| CEBPA    | -2.0900102 |
| CEBPZOS  | -1.9603524 |
| CELA1    | -1.8043404 |
| CELA2A   | -2.4375176 |
| CELF3    | -1.3518255 |
| CELRR    | -1.00917   |
| CELSR1   | -0.7894449 |
| CEND1    | -1.5101411 |
| CENPA    | -1.218482  |
| CENPH    | -0.920264  |
| CENPK    | -1.2854493 |
| CENPL    | -2.0747523 |
| CENPM    | -3.2036898 |
| CENPN    | -0.5051911 |
| CENPO    | -0.4929166 |
| CENPP    | -1.5015891 |
| CENPQ    | -0.2548871 |
| CENPV    | -2.243291  |
| CENPW    | -1.277278  |
| CEP131   | -1.2101564 |
| CEP152   | -0.505167  |
| CEP170B  | -1.7348657 |
| CEP19    | -0.1718373 |
| CEP44    | -0.9222374 |
| CEP57L1  | -1.1408112 |
| CEP63    | -0.1788664 |
| CEP68    | -1.4949555 |
| CEP72    | -2.7423806 |
| CEP89    | -0.2596026 |
| CEP97    | -0.5341082 |
| CEPT1    | -0.5152292 |

|         |            |
|---------|------------|
| CER1    | -2.0958607 |
| CERKL   | -2.6383953 |
| CERS2   | -2.0772963 |
| CES1A   | -2.8298576 |
| CES1B   | -12.434908 |
| CES1C   | -14.120815 |
| CES1D   | -3.3169494 |
| CES1E   | -5.3021407 |
| CES1F   | -5.7375975 |
| CES1G   | -5.692471  |
| CES1H   | -1.5136657 |
| CES2A   | -13.395618 |
| CES2B   | -5.275049  |
| CES2C   | -8.037493  |
| CES2E   | -9.484403  |
| CES2F   | -2.1798284 |
| CES2G   | -4.9301805 |
| CES2H   | -2.7276483 |
| CES3A   | -13.465191 |
| CES3B   | -10.495478 |
| CES4A   | -3.475373  |
| CES5A   | -2.1814377 |
| CFB     | -2.8997488 |
| CFC1    | -2.1146939 |
| CFDP1   | -0.3591385 |
| CFH     | -2.9597259 |
| CFHR1   | -11.5137   |
| CFHR2   | -4.117684  |
| CFI     | -10.457387 |
| CFL2    | -1.0631495 |
| CFP     | -2.1547556 |
| CGREF1  | -2.8683805 |
| CGRRF1  | -1.1654    |
| CHAC2   | -3.6073437 |
| CHADL   | -1.4138944 |
| CHAF1A  | -0.6949782 |
| CHAF1B  | -0.9708414 |
| CHCHD1  | -1.1159043 |
| CHCHD10 | -3.3328767 |
| CHCHD2  | -1.6139693 |
| CHCHD3  | -2.0915966 |
| CHCHD4  | -0.5435457 |
| CHCHD5  | -1.7175045 |
| CHCHD6  | -0.4531469 |
| CHCHD7  | -1.5820937 |

|         |            |
|---------|------------|
| CHD1L   | -0.775425  |
| CHD3    | -0.8127418 |
| CHD4    | -0.2795844 |
| CHD9    | -0.6671333 |
| CHDH    | -5.8826475 |
| CHEK2   | -1.1164019 |
| CHID1   | -1.7873528 |
| CHIL6   | -1.7776048 |
| CHKA    | -1.4634829 |
| CHKB    | -1.6007648 |
| CHMP1A  | -1.4851689 |
| CHMP2A  | -0.4941006 |
| CHMP5   | -0.3349237 |
| CHMP6   | -1.169765  |
| CHMP7   | -1.1791382 |
| CHN1OS3 | -2.2463672 |
| CHN2    | -3.7482498 |
| CHODL   | -2.4514318 |
| CHP1    | -1.5745482 |
| CHP2    | -3.5306363 |
| CHPF2   | -1.652945  |
| CHPT1   | -1.6020117 |
| CHRAC1  | -0.5584383 |
| CHRD    | -0.575099  |
| CHRM5   | -1.649349  |
| CHRNA1  | -1.1639938 |
| CHRNA2  | -2.5310717 |
| CHRNA4  | -2.6484642 |
| CHRNA5  | -2.28171   |
| CHRNA9  | -0.8671835 |
| CHRN2   | -1.4373548 |
| CHRN3   | -1.7489095 |
| CHRNA3  | -3.154769  |
| CHRNE   | -2.137851  |
| CHRNA6  | -5.601495  |
| CHST13  | -4.3880005 |
| CHST4   | -0.3130693 |
| CHST7   | -0.250864  |
| CHST9   | -2.6668785 |
| CHSY3   | -1.6973879 |
| CHTF18  | -0.920655  |
| CHUK    | -1.9631639 |
| CHURC1  | -1.6745458 |
| CIAO1   | -1.7118864 |
| CIAPIN1 | -1.5463662 |

|         |            |
|---------|------------|
| CIART   | -1.1794531 |
| CIB1    | -2.3053155 |
| CIB3    | -3.1000557 |
| CIDEB   | -8.696653  |
| CINP    | -0.837327  |
| CIPC    | -0.6660929 |
| CIRBP   | -1.4717388 |
| CIRH1A  | -0.8299508 |
| CISD1   | -4.1876874 |
| CISD2   | -0.8370051 |
| CISD3   | -3.2505097 |
| CITED4  | -0.2188439 |
| CKAP2   | -1.9768779 |
| CKB     | -0.3695808 |
| CKS1B   | -0.5765243 |
| CLCA2   | -1.8930156 |
| CLCA4   | -2.071556  |
| CLCA6   | -1.9902692 |
| CLCC1   | -0.7922683 |
| CLCN2   | -5.6806746 |
| CLCN3   | -1.0472775 |
| CLCN4-2 | -1.1749754 |
| CLCN7   | -1.4501195 |
| CLDN1   | -4.0188527 |
| CLDN11  | -1.1576293 |
| CLDN12  | -2.3595843 |
| CLDN14  | -5.3874407 |
| CLDN17  | -1.8459129 |
| CLDN2   | -5.834505  |
| CLDN3   | -1.4437895 |
| CLDND2  | -1.1406958 |
| CLEC11A | -1.881288  |
| CLEC14A | -0.3947535 |
| CLEC16A | -0.7527835 |
| CLEC18A | -1.8600717 |
| CLEC1B  | -2.7866454 |
| CLEC2E  | -2.3944602 |
| CLEC2F  | -2.2189279 |
| CLEC2G  | -2.2526753 |
| CLEC2H  | -5.861473  |
| CLEC3A  | -1.9142067 |
| CLEC4B2 | -2.181985  |
| CLEC4F  | -11.494522 |
| CLEC4G  | -9.234663  |
| CLEC7A  | -0.7776103 |

|         |            |
|---------|------------|
| CLHC1   | -0.7245703 |
| CLK3    | -0.1842904 |
| CLMN    | -2.742022  |
| CLN3    | -0.610795  |
| CLN5    | -0.6989312 |
| CLN6    | -0.7951183 |
| CLN8    | -1.9462361 |
| CLNKOS  | -2.1218107 |
| CLNS1A  | -0.8749824 |
| CLP1    | -1.1388102 |
| CLPB    | -2.491344  |
| CLPP    | -2.1698227 |
| CLPSL2  | -0.651372  |
| CLPTM1  | -1.9563284 |
| CLPTM1L | -0.8528051 |
| CLPX    | -3.6939282 |
| CLRN3   | -1.5760846 |
| CLSPN   | -0.2995532 |
| CLSTN3  | -2.826807  |
| CLTA    | -0.6870904 |
| CLTC    | -0.7308149 |
| CLU     | -3.878838  |
| CLUH    | -3.8732152 |
| CLVS1   | -0.6795607 |
| CLVS2   | -2.0721571 |
| CLYBL   | -4.233529  |
| CMAH    | -0.590035  |
| CMAS    | -1.0837855 |
| CMBL    | -5.7470984 |
| CMC1    | -1.8874974 |
| CMC2    | -2.1512384 |
| CML1    | -7.1367426 |
| CML2    | -7.9048853 |
| CML5    | -1.5547786 |
| CMPK1   | -0.7355022 |
| CMSS1   | -0.9972434 |
| CMTM2B  | -2.0822272 |
| CMTM8   | -2.1335    |
| CMTR2   | -0.2562232 |
| CNBD1   | -2.2760847 |
| CNBP    | -0.7829175 |
| CNDP1   | -2.084868  |
| CNDP2   | -1.4307275 |
| CNGA4   | -2.2648432 |
| CNGB3   | -2.3184843 |

|          |            |
|----------|------------|
| CNIH1    | -1.0473943 |
| CNIH3    | -2.7398121 |
| CNN3     | -0.3080692 |
| CNNM1    | -1.87426   |
| CNNM2    | -0.209322  |
| CNNM3    | -1.6023421 |
| CNOT1    | -0.9117312 |
| CNOT10   | -0.506515  |
| CNOT11   | -0.3611155 |
| CNOT3    | -1.109462  |
| CNOT8    | -1.0280638 |
| CNP      | -1.7639422 |
| CNPPD1   | -0.3295279 |
| CNPY1    | -2.59126   |
| CNPY2    | -1.9988861 |
| CNPY3    | -1.3296099 |
| CNST     | -0.5874863 |
| CNTD1    | -2.3487446 |
| CNTFR    | -0.8097835 |
| CNTN2    | -2.4943552 |
| CNTN3    | -1.8777449 |
| CNTN4    | -0.8199525 |
| CNTN5    | -1.7453463 |
| CNTN6    | -3.327578  |
| CNTNAP1  | -1.98452   |
| CNTNAP3  | -2.1670566 |
| CNTNAP4  | -2.2446904 |
| CNTNAP5C | -1.6895998 |
| CNTROB   | -1.1584713 |
| COA3     | -1.4188199 |
| COA4     | -1.5652733 |
| COA5     | -1.500843  |
| COA6     | -2.6782627 |
| COA7     | -3.3669076 |
| COASY    | -3.4099183 |
| COBLL1   | -0.7520919 |
| COCH     | -2.0771704 |
| COG2     | -0.8801951 |
| COG4     | -1.4628935 |
| COG6     | -0.5279107 |
| COG7     | -0.3163056 |
| COG8     | -1.322972  |
| COIL     | -0.2833285 |
| COL11A1  | -2.1219451 |
| COL14A1  | -2.08185   |

|         |            |
|---------|------------|
| COL17A1 | -1.171634  |
| COL18A1 | -4.726365  |
| COL19A1 | -1.5248625 |
| COL20A1 | -0.7848125 |
| COL22A1 | -2.8849337 |
| COL24A1 | -1.1928177 |
| COL25A1 | -1.8722694 |
| COL27A1 | -1.5857923 |
| COL28A1 | -2.8148375 |
| COL5A3  | -1.5533321 |
| COL6A5  | -1.1872635 |
| COL6A6  | -1.3148243 |
| COL9A2  | -0.8921249 |
| COL9A3  | -1.5509887 |
| COLEC10 | -8.306814  |
| COLEC11 | -7.098563  |
| COMMD1  | -2.055056  |
| COMMD10 | -0.5150433 |
| COMMD2  | -1.5660753 |
| COMMD3  | -2.4563317 |
| COMMD4  | -0.9862037 |
| COMMD5  | -2.123796  |
| COMMD6  | -1.5276179 |
| COMMD7  | -0.7118058 |
| COMMD8  | -0.3887644 |
| COMMD9  | -2.278276  |
| COMT    | -3.6605268 |
| COMTD1  | -0.9263058 |
| COPA    | -0.8103409 |
| COPB1   | -0.7648454 |
| COPB2   | -1.2204204 |
| COPE    | -1.9062691 |
| COPG1   | -0.2345276 |
| COPG2   | -1.0060506 |
| COPRS   | -0.910182  |
| COPS2   | -0.2783594 |
| COPS3   | -1.5702691 |
| COPS5   | -1.6465769 |
| COPS6   | -2.481573  |
| COPS7A  | -0.8930507 |
| COPS7B  | -0.8144555 |
| COPS8   | -0.3403449 |
| COPZ1   | -1.2753406 |
| COPZ2   | -2.699716  |
| COQ10A  | -1.7556334 |

|         |            |
|---------|------------|
| COQ2    | -1.2465796 |
| COQ3    | -2.3084264 |
| COQ4    | -2.004696  |
| COQ5    | -1.7772741 |
| COQ6    | -1.7403574 |
| COQ7    | -1.9798012 |
| COQ9    | -3.5513487 |
| CORIN   | -2.0638764 |
| CORO1B  | -0.9949532 |
| CORO6   | -0.6930733 |
| CORO7   | -1.1372957 |
| COX1    | -1.3396134 |
| COX10   | -1.4332683 |
| COX11   | -1.5136585 |
| COX14   | -0.4798565 |
| COX15   | -1.4531538 |
| COX16   | -1.6783333 |
| COX17   | -1.9473112 |
| COX18   | -1.955029  |
| COX19   | -1.4038782 |
| COX2    | -1.1607594 |
| COX20   | -1.6748295 |
| COX3    | -1.4737287 |
| COX4I1  | -1.6993937 |
| COX5A   | -1.9538579 |
| COX5B   | -1.4379807 |
| COX6A1  | -1.8320937 |
| COX6B1  | -1.4269772 |
| COX6C   | -1.4540362 |
| COX7A2  | -1.5338311 |
| COX7A2L | -1.3258734 |
| COX7B   | -2.1113782 |
| COX7B2  | -2.0341086 |
| COX7C   | -1.8613644 |
| COX8A   | -1.807744  |
| COX8C   | -2.15306   |
| CP      | -3.1063519 |
| CPA2    | -1.1865263 |
| CPA4    | -2.0641596 |
| CPA6    | -1.3572817 |
| CPB2    | -10.627819 |
| CPEB2   | -1.2509604 |
| CPEB3   | -1.278408  |
| CPHX1   | -3.5375638 |
| CPLX1   | -0.7683246 |



|         |            |
|---------|------------|
| CPLX2   | -0.6939693 |
| CPLX4   | -2.2415116 |
| CPN1    | -7.872017  |
| CPN2    | -9.986153  |
| CPNE4   | -2.8331206 |
| CPNE6   | -1.9428213 |
| CPNE9   | -2.0986571 |
| CPOX    | -3.9329238 |
| CPPED1  | -3.1916451 |
| CPQ     | -2.173286  |
| CPS1    | -12.247826 |
| CPSF1   | -1.2102633 |
| CPSF3   | -0.7313342 |
| CPSF3L  | -0.9284005 |
| CPSF4   | -1.3276496 |
| CPSF4L  | -5.3875456 |
| CPT1A   | -2.875452  |
| CPT2    | -3.5359545 |
| CPVL    | -2.155079  |
| CPXCR1  | -3.8250852 |
| CR2     | -1.0024698 |
| CRABP2  | -0.4350653 |
| CRADD   | -1.501811  |
| CRAT    | -0.5053489 |
| CRB1    | -1.2952952 |
| CRB2    | -1.2447519 |
| CRB3    | -0.7023811 |
| CRBN    | -0.4388075 |
| CRCP    | -1.8724928 |
| CRCT1   | -2.170727  |
| CREB3L3 | -10.58644  |
| CREB5   | -1.7165179 |
| CREBBP  | -0.4159064 |
| CREG1   | -2.6027694 |
| CREG2   | -0.9584847 |
| CRELD1  | -1.711896  |
| CRH     | -2.3462152 |
| CRHBP   | -1.9996004 |
| CRHR2   | -1.0730913 |
| CRIPT   | -0.3799219 |
| CRISP1  | -2.1208367 |
| CRISP2  | -1.7804191 |
| CRISP3  | -2.2149477 |
| CRISP4  | -2.2904599 |
| CRLS1   | -2.8204908 |

|          |            |
|----------|------------|
| CRNKL1   | -0.296387  |
| CRNN     | -1.8853128 |
| CROCC    | -0.3525114 |
| CROT     | -5.4743934 |
| CRP      | -9.011292  |
| CRTAP    | -0.315867  |
| CRTC1    | -1.0387225 |
| CRX      | -1.9182811 |
| CRY1     | -0.3254042 |
| CRYBA1   | -1.1439967 |
| CRYBA4   | -1.8313234 |
| CRYBB3   | -3.471603  |
| CRYGA    | -0.9087765 |
| CRYGC    | -1.5029421 |
| CRYGE    | -2.1293814 |
| CRYGF    | -1.1810038 |
| CRYGN    | -2.2698653 |
| CRYGS    | -2.7459211 |
| CRYL1    | -1.5044742 |
| CRYM     | -2.5655246 |
| CRYZ     | -4.9425974 |
| CS       | -0.3385854 |
| CSAD     | -1.8669214 |
| CSDE1    | -0.4469647 |
| CSE1L    | -0.4613209 |
| CSF1R    | -1.0056338 |
| CSK      | -0.8396792 |
| CSL      | -2.2677522 |
| CSMD1    | -0.1792336 |
| CSMD2    | -2.690236  |
| CSMD2OS  | -0.9530306 |
| CSMD3    | -2.099926  |
| CSN1S1   | -2.2633734 |
| CSN1S2A  | -2.276774  |
| CSN1S2B  | -2.299879  |
| CSN2     | -3.342747  |
| CSN3     | -1.2178495 |
| CSNK1G2  | -1.2774277 |
| CSNK2A1  | -0.7133136 |
| CSNK2A2  | -0.4579105 |
| CSNK2B   | -1.0548496 |
| CSNKA2IP | -1.644371  |
| CSPRS    | -0.1483479 |
| CSRNP2   | -0.7456801 |
| CSRP2    | -0.5650606 |

|          |            |
|----------|------------|
| CSRP2BP  | -1.0916781 |
| CSRP3    | -1.9124513 |
| CST11    | -1.6474786 |
| CST12    | -1.8521714 |
| CST13    | -2.0859945 |
| CST9     | -2.2374961 |
| CSTA1    | -2.1128278 |
| CSTB     | -0.8319936 |
| CSTF1    | -1.1812668 |
| CSTF2T   | -1.0188212 |
| CSTL1    | -2.2903986 |
| CTAG2    | -2.1394572 |
| CTAGE5   | -2.3131132 |
| CTC1     | -0.9423232 |
| CTCFL    | -2.544104  |
| CTCFLOS  | -3.4329958 |
| CTDNEP1  | -0.2871971 |
| CTDSP1   | -0.7385173 |
| CTDSP2   | -0.5054154 |
| CTF1     | -2.2491312 |
| CTF2     | -2.0052269 |
| CTH      | -5.912226  |
| CTIF     | -2.1945224 |
| CTNNA2   | -2.5456624 |
| CTNNA3   | -0.9097357 |
| CTNNBIP1 | -1.42518   |
| CTNS     | -1.4369249 |
| CTPS2    | -0.2863531 |
| CTR9     | -0.2164927 |
| CTRB1    | -2.9345195 |
| CTS3     | -2.0518656 |
| CTS8     | -2.0696785 |
| CTSA     | -1.3553109 |
| CTSB     | -1.4460444 |
| CTSC     | -0.5052404 |
| CTSD     | -1.1822972 |
| CTSE     | -1.166728  |
| CTSF     | -2.4087415 |
| CTSG     | -1.1337342 |
| CTSH     | -1.3395047 |
| CTSJ     | -2.3540802 |
| CTSL     | -2.6188364 |
| CTSLL3   | -2.1517751 |
| CTSQ     | -2.9941025 |
| CTSR     | -2.1218147 |

|          |            |
|----------|------------|
| CTSZ     | -1.644568  |
| CTTN     | -0.4661236 |
| CTU1     | -0.6170211 |
| CTU2     | -0.4406185 |
| CUL2     | -0.5470672 |
| CUL4A    | -1.2010207 |
| CUL4B    | -0.2073746 |
| CUL9     | -1.0510647 |
| CUTA     | -0.3412314 |
| CUTAL    | -2.4303079 |
| CUTC     | -1.995425  |
| CUX2     | -2.8439345 |
| CUZD1    | -2.0659335 |
| CWC15    | -0.3767161 |
| CWF19L1  | -2.2433157 |
| CWF19L2  | -0.1996408 |
| CWH43    | -2.0424945 |
| CXCL11   | -0.5106473 |
| CXCL12   | -2.6808157 |
| CXCL9    | -0.3651981 |
| CXXC1    | -0.688406  |
| CXXC5    | -4.0810246 |
| CYB561A3 | -0.4514198 |
| CYB561D1 | -0.1794677 |
| CYB561D2 | -1.201767  |
| CYB5A    | -2.4311867 |
| CYB5B    | -2.6340694 |
| CYB5D1   | -0.618948  |
| CYB5D2   | -2.1101022 |
| CYB5R2   | -1.8956852 |
| CYB5R3   | -2.5648565 |
| CYB5RL   | -2.5010786 |
| CYC1     | -2.837953  |
| CYCS     | -1.0102515 |
| CYCT     | -0.9903805 |
| CYHR1    | -2.260962  |
| CYLC1    | -2.727576  |
| CYM      | -1.4189897 |
| CYP11B1  | -2.1066382 |
| CYP11B2  | -2.0631607 |
| CYP17A1  | -0.8947191 |
| CYP1A2   | -13.096146 |
| CYP21A1  | -1.6077209 |
| CYP24A1  | -2.2064404 |
| CYP26A1  | -5.373579  |

|            |            |
|------------|------------|
| CYP26B1    | -4.4947405 |
| CYP26C1    | -4.286748  |
| CYP27A1    | -6.180168  |
| CYP2A12    | -13.864351 |
| CYP2A22    | -8.954845  |
| CYP2A4     | -8.141668  |
| CYP2B13    | -11.916339 |
| CYP2B19    | -2.0328147 |
| CYP2B9     | -2.9999056 |
| CYP2C29    | -14.6297   |
| CYP2C37    | -12.438299 |
| CYP2C38    | -11.583357 |
| CYP2C39    | -13.402296 |
| CYP2C44    | -9.619181  |
| CYP2C50    | -15.708157 |
| CYP2C54    | -12.590944 |
| CYP2C55    | -6.6115727 |
| CYP2C65    | -2.3366332 |
| CYP2C66    | -2.1790268 |
| CYP2C67    | -13.671115 |
| CYP2C68    | -14.417795 |
| CYP2C70    | -10.807396 |
| CYP2D10    | -13.272583 |
| CYP2D11    | -7.2272787 |
| CYP2D12    | -8.577837  |
| CYP2D13    | -9.031832  |
| CYP2D22    | -6.513575  |
| CYP2D26    | -13.294938 |
| CYP2D34    | -10.783098 |
| CYP2D37-PS | -11.700668 |
| CYP2D40    | -9.393446  |
| CYP2D9     | -10.283545 |
| CYP2E1     | -8.231131  |
| CYP2G1     | -8.932589  |
| CYP2J13    | -4.745509  |
| CYP2J5     | -6.1358566 |
| CYP2J6     | -3.3693137 |
| CYP2J8     | -6.1485386 |
| CYP2J9     | -1.8071697 |
| CYP2R1     | -4.327455  |
| CYP2U1     | -1.6665487 |
| CYP39A1    | -2.776813  |
| CYP3A11    | -12.894746 |
| CYP3A13    | -7.565067  |
| CYP3A16    | -13.927149 |

|          |            |
|----------|------------|
| CYP3A25  | -13.783697 |
| CYP3A41B | -13.981497 |
| CYP3A44  | -12.273682 |
| CYP3A57  | -12.539465 |
| CYP3A59  | -13.302617 |
| CYP46A1  | -0.7357149 |
| CYP4A10  | -11.716343 |
| CYP4A12A | -1.9337721 |
| CYP4A12B | -1.2749617 |
| CYP4A14  | -15.535548 |
| CYP4A30B | -2.2191906 |
| CYP4A31  | -11.535511 |
| CYP4A32  | -12.164034 |
| CYP4F13  | -2.976663  |
| CYP4F14  | -11.302063 |
| CYP4F15  | -5.701227  |
| CYP4F16  | -0.7886691 |
| CYP4F17  | -2.7111268 |
| CYP4F37  | -2.1260667 |
| CYP4F39  | -1.1157882 |
| CYP4F40  | -2.2245088 |
| CYP4V3   | -3.1737113 |
| CYP4X1   | -1.6652031 |
| CYP51    | -3.2583613 |
| CYP7A1   | -10.719387 |
| CYP7B1   | -2.174346  |
| CYP8B1   | -8.140261  |
| CYPT1    | -2.0029287 |
| CYPT10   | -1.3365748 |
| CYPT12   | -2.0319943 |
| CYPT14   | -3.9809117 |
| CYPT15   | -2.114825  |
| CYPT2    | -2.5174296 |
| CYPT3    | -2.2090378 |
| CYPT7    | -2.1343768 |
| CYPT8    | -2.164309  |
| CYPT9    | -2.269485  |
| CYTB     | -1.7511849 |
| CYTH1    | -0.5453968 |
| DAB1     | -1.1116006 |
| DACT2    | -4.647129  |
| DAD1     | -1.3975792 |
| DAGLB    | -1.825491  |
| DAK      | -7.6637897 |
| DALRD3   | -1.029974  |

|          |            |
|----------|------------|
| DANCR    | -0.2276497 |
| DAND5    | -0.8223302 |
| DAP      | -3.0872545 |
| DAP3     | -1.369154  |
| DAPK1    | -0.4514046 |
| DAPK2    | -0.5700946 |
| DARS     | -0.4569917 |
| DARS2    | -2.1244864 |
| DAZAP1   | -0.4978676 |
| DAZL     | -2.2125008 |
| DBHOS    | -2.3120584 |
| DBI      | -3.3969321 |
| DBIL5    | -2.3740392 |
| DBNDD2   | -0.2327738 |
| DBNL     | -0.1729341 |
| DBP      | -4.4377174 |
| DBR1     | -0.5663109 |
| DBT      | -3.231626  |
| DBX1     | -1.8873749 |
| DBX2     | -2.4020488 |
| DCAF11   | -2.626614  |
| DCAF12   | -0.402524  |
| DCAF12L1 | -2.0650232 |
| DCAF13   | -0.3704796 |
| DCAF17   | -0.5431819 |
| DCAF4    | -1.2481179 |
| DCAF5    | -1.249608  |
| DCAF6    | -0.5432348 |
| DCAF7    | -0.5775731 |
| DCAF8    | -1.3960471 |
| DCAKD    | -1.8217235 |
| DCDC2A   | -0.5577359 |
| DCDC2C   | -2.0850737 |
| DCLK3    | -6.464141  |
| DCLRE1A  | -2.1257432 |
| DCN      | -1.4068818 |
| DCPP1    | -2.096176  |
| DCPP2    | -2.1057942 |
| DCPP3    | -2.255498  |
| DCPS     | -0.766737  |
| DCST2    | -0.8936248 |
| DCT      | -7.8123455 |
| DCTN2    | -1.8416162 |
| DCTN3    | -0.5514145 |
| DCTPP1   | -2.8988013 |

|         |            |
|---------|------------|
| DCUN1D1 | -0.3958092 |
| DCUN1D2 | -0.6152811 |
| DCUN1D4 | -1.4016643 |
| DCX     | -2.0010734 |
| DCXR    | -3.2605958 |
| DDAH1   | -3.1866727 |
| DDB1    | -0.737679  |
| DDB2    | -0.5822911 |
| DDC     | -5.869725  |
| DDHD2   | -0.3848145 |
| DDI1    | -2.3653705 |
| DDI2    | -1.8865876 |
| DDIT4L  | -2.1380973 |
| DDO     | -2.2330463 |
| DDOST   | -0.4537621 |
| DDRK1   | -2.0615687 |
| DDT     | -4.5243473 |
| DDX1    | -0.8672781 |
| DDX10   | -0.2380672 |
| DDX19A  | -0.7817433 |
| DDX19B  | -0.800993  |
| DDX20   | -0.249125  |
| DDX27   | -0.3227429 |
| DDX28   | -2.0167108 |
| DDX31   | -0.362524  |
| DDX3Y   | -2.2374208 |
| DDX4    | -2.0269938 |
| DDX41   | -1.5086918 |
| DDX47   | -0.484704  |
| DDX49   | -0.9159875 |
| DDX51   | -0.8126926 |
| DDX54   | -0.3905373 |
| DDX56   | -1.773747  |
| DDX59   | -0.2175465 |
| DEAF1   | -0.8562832 |
| DEAR1   | -2.903208  |
| DEB1    | -2.3730655 |
| DECR1   | -3.8786392 |
| DECR2   | -4.467275  |
| DEF8    | -2.7997203 |
| DEFA1   | -2.1178205 |
| DEFA2   | -2.7825341 |
| DEFA21  | -3.048607  |
| DEFA23  | -0.6490097 |
| DEFA3   | -2.758287  |



|           |            |
|-----------|------------|
| DEFA-PS12 | -1.5027962 |
| DEFA-PS13 | -2.180853  |
| DEFA-RS1  | -2.113401  |
| DEFA-RS10 | -0.6208861 |
| DEFA-RS12 | -1.5376205 |
| DEFA-RS2  | -2.694463  |
| DEFA-RS4  | -2.1743264 |
| DEFA-RS7  | -1.8599887 |
| DEFB12    | -2.0921726 |
| DEFB13    | -1.8481102 |
| DEFB19    | -2.3099945 |
| DEFB20    | -2.1745062 |
| DEFB21    | -4.4147997 |
| DEFB22    | -0.7919395 |
| DEFB26    | -3.749054  |
| DEFB28    | -1.7228477 |
| DEFB3     | -1.5416882 |
| DEFB34    | -2.4996185 |
| DEFB35    | -1.5722134 |
| DEFB36    | -1.8579664 |
| DEFB37    | -0.9820814 |
| DEFB38    | -1.9108891 |
| DEFB39    | -1.9488046 |
| DEFB4     | -2.357683  |
| DEFB40    | -2.0082917 |
| DEFB42    | -0.6425018 |
| DEFB43    | -2.1442552 |
| DEFB44-PS | -1.8798199 |
| DEFB46    | -1.8813505 |
| DEFB48    | -2.0239599 |
| DEFB5     | -2.0529208 |
| DEFB50    | -1.9432108 |
| DEFB6     | -3.758707  |
| DEFB7     | -2.0067074 |
| DEFB8     | -2.1197608 |
| DEGS1     | -0.5660276 |
| DEGS2     | -1.2998462 |
| DENND1A   | -1.005466  |
| DENND2D   | -0.5848489 |
| DENND4A   | -1.5621791 |
| DENND5B   | -0.4870338 |
| DENND6A   | -0.4297633 |
| DENND6B   | -2.040035  |
| DENR      | -0.8868136 |
| DEPDC5    | -0.343174  |

|         |            |
|---------|------------|
| DEPDC7  | -5.0004764 |
| DEPTOR  | -1.7972069 |
| DERA    | -3.9409971 |
| DERL1   | -1.6652412 |
| DERL2   | -1.5060539 |
| DERL3   | -2.29743   |
| DESI1   | -1.504529  |
| DESI2   | -1.4248161 |
| DET1    | -2.568142  |
| DEXI    | -1.8069029 |
| DFFA    | -0.4204562 |
| DFFB    | -0.5766587 |
| DFNA5   | -0.2889831 |
| DFNB59  | -1.8583527 |
| DGAT1   | -1.0585227 |
| DGAT2   | -4.0424185 |
| DGAT2L6 | -1.988205  |
| DGCR2   | -1.3403621 |
| DGCR6   | -2.6660972 |
| DGKQ    | -1.3197374 |
| DGKZ    | -1.4387302 |
| DGUOK   | -0.8646202 |
| DHCR24  | -5.2397847 |
| DHCR7   | -5.650057  |
| DHDDS   | -0.6398959 |
| DHDDH   | -4.514212  |
| DHFR    | -3.5795362 |
| DHODH   | -1.6352448 |
| DHRS1   | -3.0564637 |
| DHRS11  | -3.7242374 |
| DHRS13  | -1.2782159 |
| DHRS2   | -2.228606  |
| DHRS3   | -1.2271595 |
| DHRS4   | -3.450334  |
| DHRS7   | -2.2409525 |
| DHRS7B  | -1.4696798 |
| DHRSX   | -1.1700478 |
| DHTKD1  | -4.9061356 |
| DHX16   | -0.5557075 |
| DHX32   | -1.3341236 |
| DHX33   | -0.3715925 |
| DHX34   | -0.2749605 |
| DHX35   | -0.6390095 |
| DHX36   | -0.9645567 |
| DHX37   | -1.3109128 |

|         |            |
|---------|------------|
| DHX58   | -0.449059  |
| DIABLO  | -1.1576285 |
| DICER1  | -0.3311348 |
| DIO1    | -8.078251  |
| DIO3    | -1.9062359 |
| DIO3OS  | -2.7367008 |
| DIP2C   | -0.3612738 |
| DIRAS1  | -1.6642604 |
| DIS3L   | -0.4145165 |
| DIS3L2  | -1.2432613 |
| DISC1   | -2.3210492 |
| DISP1   | -1.1182027 |
| DIXDC1  | -2.2477448 |
| DKC1    | -0.4319401 |
| DKK1    | -2.134708  |
| DKK4    | -2.6685996 |
| DLAT    | -0.5923715 |
| DLD     | -1.5559249 |
| DLEC1   | -0.7769275 |
| DLEU2   | -0.9136822 |
| DLEU7   | -2.1887944 |
| DLG2    | -2.039743  |
| DLG3    | -0.3995476 |
| DLGAP1  | -1.9724064 |
| DLGAP2  | -2.0989113 |
| DLGAP3  | -0.3941414 |
| DLGAP5  | -1.1147344 |
| DLK2    | -0.9541526 |
| DLST    | -1.6044383 |
| DLX1    | -2.0101151 |
| DLX2    | -2.3555317 |
| DLX3    | -1.0799875 |
| DLX6    | -1.4361181 |
| DLX6AS2 | -1.0208952 |
| DLX6OS1 | -1.7866044 |
| DMAP1   | -0.6840591 |
| DMBT1   | -4.1724234 |
| DMBX1   | -2.2751338 |
| DMGDH   | -13.086003 |
| DMP1    | -2.1597974 |
| DMPK    | -2.5535464 |
| DMRTA1  | -1.8114014 |
| DMRTA2  | -2.2600856 |
| DMRTB1  | -1.4578826 |
| DMRTC1A | -2.0949607 |

|          |            |
|----------|------------|
| DMRTC2   | -2.2160227 |
| DMTN     | -1.5590563 |
| DMWD     | -0.4169197 |
| DNA2     | -0.7895753 |
| DNAH1    | -1.1820192 |
| DNAH3    | -2.3586547 |
| DNAIC1   | -1.554059  |
| DNAJA1   | -0.4816976 |
| DNAJA2   | -1.0872159 |
| DNAJA3   | -2.8532486 |
| DNAJB11  | -0.2302356 |
| DNAJB12  | -1.5465374 |
| DNAJB2   | -1.0187035 |
| DNAJB7   | -1.770258  |
| DNAJB8   | -1.1360748 |
| DNAJC11  | -1.665993  |
| DNAJC12  | -3.1639318 |
| DNAJC15  | -1.6680336 |
| DNAJC16  | -2.0291433 |
| DNAJC17  | -1.1984107 |
| DNAJC19  | -1.5247264 |
| DNAJC22  | -8.204077  |
| DNAJC25  | -2.6807995 |
| DNAJC30  | -1.7989874 |
| DNAJC4   | -1.4053845 |
| DNAJC5G  | -2.2302291 |
| DNAJC6   | -2.1028445 |
| DNAJC8   | -0.3415999 |
| DNAL1    | -2.2492802 |
| DNASE1L3 | -3.5721056 |
| DNASE2B  | -5.025454  |
| DNER     | -0.6926365 |
| DNLZ     | -1.8179302 |
| DNM1L    | -0.2653947 |
| DNMBP    | -1.511069  |
| DNMT3B   | -1.4493432 |
| DNPEP    | -1.2127452 |
| DNPH1    | -3.9748147 |
| DNTT     | -5.944254  |
| DOC2G    | -0.4255893 |
| DOCK3    | -1.666812  |
| DOCK6    | -0.5268641 |
| DOHH     | -1.0425062 |
| DOK5     | -2.0715075 |
| DOLK     | -1.3421459 |

|         |            |
|---------|------------|
| DOLPP1  | -1.2400184 |
| DOPEY2  | -0.3884153 |
| DOS     | -1.282906  |
| DOT1L   | -0.2518554 |
| DOXL2   | -1.0031879 |
| DPAGT1  | -1.3512788 |
| DPCD    | -0.6217856 |
| DPEP3   | -1.6029315 |
| DPF1    | -1.1489046 |
| DPF3    | -3.681247  |
| DPH1    | -2.2085218 |
| DPH5    | -0.1835995 |
| DPH6    | -0.2902374 |
| DPM1    | -0.9549232 |
| DPM2    | -0.7257719 |
| DPM3    | -1.8628435 |
| DPP3    | -1.8978033 |
| DPP4    | -2.2810903 |
| DPP7    | -2.2135592 |
| DPP9    | -0.4515042 |
| DPPA1   | -2.9660451 |
| DPPA2   | -1.2755063 |
| DPPA3   | -1.9142833 |
| DPPA4   | -1.0994077 |
| DPY19L1 | -1.6643176 |
| DPY19L2 | -1.8434672 |
| DPY30   | -0.7722936 |
| DPYD    | -7.047153  |
| DPYS    | -9.294609  |
| DPYSL4  | -1.9959953 |
| DPYSL5  | -1.6605277 |
| DQX1    | -2.234852  |
| DRAM2   | -0.6413922 |
| DRAXIN  | -2.9316888 |
| DRD1A   | -2.2192707 |
| DRD3    | -1.827744  |
| DRD4    | -2.5845609 |
| DRD5    | -1.5989692 |
| DRG1    | -0.7724557 |
| DRG2    | -1.8681622 |
| DSC1    | -0.2787571 |
| DSC2    | -6.831544  |
| DSC3    | -2.904684  |
| DSCAML1 | -1.1950166 |
| DSCR3   | -0.6056113 |

|         |            |
|---------|------------|
| DSE     | -0.578366  |
| DSG1A   | -2.143388  |
| DSG1B   | -2.5569575 |
| DSG1C   | -1.1121368 |
| DSG2    | -3.1129372 |
| DSG3    | -1.7574673 |
| DSG4    | -2.179488  |
| DSP     | -0.7615352 |
| DTD1    | -1.1081285 |
| DTD2    | -2.3129284 |
| DTNBP1  | -1.3242869 |
| DTWD1   | -1.5836964 |
| DTWD2   | -1.0282619 |
| DUOX1   | -2.0794282 |
| DUOXA1  | -1.4950762 |
| DUOXA2  | -0.8414202 |
| DUS1L   | -2.5381837 |
| DUS2    | -1.249104  |
| DUS3L   | -0.4235196 |
| DUS4L   | -0.5829849 |
| DUSP12  | -0.9776478 |
| DUSP15  | -2.9715972 |
| DUSP19  | -0.1768596 |
| DUSP21  | -2.1586826 |
| DUSP22  | -2.163383  |
| DUSP23  | -1.0648062 |
| DUSP28  | -2.6212015 |
| DUT     | -1.0112553 |
| DUX     | -1.2528722 |
| DUXBL1  | -2.221302  |
| DVL1    | -1.766315  |
| DVL2    | -1.1326962 |
| DXBAY18 | -0.7515109 |
| DXO     | -1.4176836 |
| DYM     | -1.086401  |
| DYNAP   | -2.0685334 |
| DYNLL2  | -2.462143  |
| DYNLRB1 | -1.0144677 |
| DYRK1B  | -1.4178271 |
| DYRK2   | -0.7337513 |
| DYSF    | -0.7903776 |
| EAF1    | -0.6660495 |
| EAF2    | -1.8498459 |
| EAPP    | -0.5120053 |
| EARS2   | -2.2200007 |

|        |            |
|--------|------------|
| EBAG9  | -1.1807938 |
| EBF3   | -3.0349207 |
| EBP    | -3.2791286 |
| EBPL   | -5.533006  |
| ECD    | -1.201365  |
| ECE2   | -1.7730069 |
| ECEL1  | -1.3687506 |
| ECH1   | -3.5694742 |
| ECHDC1 | -1.1279678 |
| ECHDC2 | -3.2496614 |
| ECHDC3 | -5.7408814 |
| ECHS1  | -3.8523636 |
| ECI1   | -3.187841  |
| ECI2   | -2.8880835 |
| ECI3   | -2.9722881 |
| ECM1   | -0.2740493 |
| ECSIT  | -1.4186664 |
| ECT2   | -1.2918973 |
| EDA    | -0.3519788 |
| EDA2R  | -1.8186831 |
| EDAR   | -0.3598802 |
| EDDM3B | -2.2654502 |
| EDEM1  | -1.486166  |
| EDEM2  | -1.66429   |
| EDF1   | -1.6975117 |
| EDN2   | -2.235153  |
| EDNRB  | -0.6907511 |
| EDRF1  | -0.3516231 |
| EEF1A1 | -1.4887457 |
| EEF1B2 | -1.125474  |
| EEF1D  | -0.874341  |
| EEF1G  | -0.575839  |
| EEF2   | -1.8305697 |
| EEF2K  | -0.5669575 |
| EEFSEC | -2.9008708 |
| EEPD1  | -1.55808   |
| EFCAB2 | -0.2300143 |
| EFCAB8 | -2.1236641 |
| EFNA1  | -1.4752159 |
| EFNA3  | -0.3959329 |
| EFR3A  | -0.7779303 |
| EGF    | -1.505024  |
| EGFEM1 | -1.2615466 |
| EGFR   | -2.6398091 |
| EGLN2  | -0.9177427 |

|          |            |
|----------|------------|
| EGLN3    | -1.6451311 |
| EGR4     | -2.0221627 |
| EHD3     | -3.1882515 |
| EHHADH   | -8.025709  |
| EHMT1    | -1.1088157 |
| EHMT2    | -0.7358718 |
| EI24     | -2.8263707 |
| EID2B    | -0.9671557 |
| EID3     | -0.5786562 |
| EIF1     | -0.2595143 |
| EIF1A    | -0.5641952 |
| EIF1AD   | -1.2899771 |
| EIF1B    | -0.2694497 |
| EIF1-PS  | -0.7656865 |
| EIF2A    | -0.7071695 |
| EIF2AK1  | -1.2556968 |
| EIF2B1   | -1.3842196 |
| EIF2B4   | -1.4719672 |
| EIF2B5   | -0.9565201 |
| EIF2D    | -1.9842472 |
| EIF2S1   | -0.4189267 |
| EIF2S2   | -0.2332749 |
| EIF2S3X  | -0.6553974 |
| EIF3A    | -0.6149693 |
| EIF3B    | -0.5329065 |
| EIF3D    | -0.4913855 |
| EIF3F    | -0.616571  |
| EIF3G    | -0.4581604 |
| EIF3H    | -0.4433503 |
| EIF3I    | -1.5448413 |
| EIF3J1   | -0.8666129 |
| EIF3K    | -0.4373808 |
| EIF3L    | -0.8502207 |
| EIF3M    | -0.4167109 |
| EIF4A3   | -0.5928578 |
| EIF4B    | -0.5113831 |
| EIF4E    | -0.4696546 |
| EIF4E2   | -1.3796844 |
| EIF4E3   | -0.2753601 |
| EIF4EBP1 | -1.4064035 |
| EIF4EBP2 | -1.5490785 |
| EIF4EBP3 | -1.1135845 |
| EIF4G1   | -1.6989155 |
| EIF4G2   | -0.6073165 |
| EIF4G3   | -0.3426304 |



|        |            |
|--------|------------|
| EIF4H  | -0.309701  |
| EIF5   | -0.4047389 |
| EIF5A  | -1.7817445 |
| EIF5B  | -0.8088479 |
| EIF6   | -1.4184804 |
| ELAC1  | -0.675981  |
| ELAC2  | -1.3246346 |
| ELAVL2 | -2.0791657 |
| ELAVL3 | -1.6661391 |
| ELAVL4 | -0.6591725 |
| ELFN1  | -2.095515  |
| ELK1   | -0.7283521 |
| ELK3   | -0.2912269 |
| ELL    | -0.8080702 |
| ELL2   | -0.6835303 |
| ELL3   | -4.051662  |
| ELMO3  | -1.4066596 |
| ELMOD2 | -0.952385  |
| ELMOD3 | -1.4016414 |
| ELOF1  | -0.5550938 |
| ELOVL2 | -12.488361 |
| ELOVL3 | -2.5831807 |
| ELOVL4 | -0.4830139 |
| ELOVL5 | -3.1318927 |
| ELOVL6 | -3.462903  |
| ELP2   | -0.4817066 |
| ELP3   | -1.2157626 |
| ELP4   | -1.1889904 |
| ELP5   | -0.4950361 |
| ELP6   | -1.3487492 |
| ELTD1  | -0.4177525 |
| EMC1   | -1.0049148 |
| EMC10  | -2.0565326 |
| EMC3   | -1.3664713 |
| EMC4   | -0.7991514 |
| EMC6   | -1.5970607 |
| EMC7   | -1.5147247 |
| EMC8   | -1.4713831 |
| EMC9   | -2.984745  |
| EME1   | -0.5491614 |
| EME2   | -1.6214347 |
| EMG1   | -0.8951664 |
| EML3   | -0.7895856 |
| EML4   | -0.3397722 |
| EML5   | -0.8915091 |

|           |            |
|-----------|------------|
| EMR1      | -1.22506   |
| EMR4      | -0.5186939 |
| EMX1      | -1.8454895 |
| EMX2      | -2.0782905 |
| EN1       | -2.1703207 |
| EN2       | -1.3637099 |
| ENAM      | -2.251872  |
| ENDOG     | -3.022503  |
| ENDOV     | -0.671546  |
| ENGASE    | -1.9401631 |
| ENHO      | -3.5355139 |
| ENO1      | -2.3510137 |
| ENO1B     | -2.4282784 |
| ENOX1     | -1.1802905 |
| ENOX2     | -0.6126709 |
| ENPEP     | -1.6127238 |
| ENPP1     | -2.0800877 |
| ENPP2     | -1.6984181 |
| ENPP3     | -3.8981097 |
| ENPP5     | -0.483613  |
| ENSA      | -0.3762474 |
| ENTHD1    | -1.6731005 |
| ENTHD2    | -1.0161929 |
| ENTPD2    | -1.6103268 |
| ENTPD5    | -3.6225095 |
| ENTPD6    | -2.2729177 |
| ENTPD7    | -0.9451006 |
| ENTPD8    | -9.251875  |
| ENY2      | -1.4529753 |
| EPB4.1    | -0.2389956 |
| EPB4.1L3  | -0.8615336 |
| EPB4.1L4B | -1.5940676 |
| EPB4.1L5  | -0.7303617 |
| EPB4.2    | -1.5817237 |
| EPG5      | -1.0167117 |
| EPHA1     | -4.7467785 |
| EPHA5     | -1.6885967 |
| EPHA6     | -2.1260593 |
| EPHB2     | -0.9962082 |
| EPHB3     | -1.357502  |
| EPHB4     | -0.5408144 |
| EPHB6     | -0.6579461 |
| EPHX1     | -3.2822013 |
| EPHX2     | -8.284121  |
| EPHX3     | -0.621923  |

|          |            |
|----------|------------|
| EPM2AIP1 | -0.4599333 |
| EPN1     | -1.2718849 |
| EPOR     | -1.8298416 |
| EPPIN    | -1.9579449 |
| EPPK1    | -1.3317757 |
| EPRS     | -1.6924794 |
| EPS8L2   | -1.3328447 |
| EPT1     | -2.68397   |
| EPX      | -2.6451328 |
| EPYC     | -2.2657743 |
| ERAL1    | -1.4995189 |
| ERAP1    | -1.4073577 |
| ERBB3    | -1.0346205 |
| ERBB4    | -0.7079487 |
| ERCC2    | -0.3794193 |
| ERCC3    | -0.946444  |
| ERCC6L   | -0.5973575 |
| ERCC6L2  | -0.419035  |
| ERCC8    | -0.4318175 |
| ERDR1    | -1.0089989 |
| ERF      | -1.1875296 |
| ERGIC1   | -2.3745494 |
| ERGIC2   | -0.5745845 |
| ERGIC3   | -1.4925957 |
| ERI2     | -1.3910108 |
| ERI3     | -1.8611372 |
| ERICH4   | -4.264982  |
| ERICH5   | -2.0031672 |
| ERICH6   | -0.5566678 |
| ERLEC1   | -0.453733  |
| ERLIN1   | -1.5743985 |
| ERLIN2   | -1.2333941 |
| ERMARD   | -1.2855    |
| ERMP1    | -1.5805392 |
| ERN1     | -0.2057388 |
| ERO1LB   | -2.1209579 |
| ERP29    | -0.8213735 |
| ERP44    | -0.2497068 |
| ERRFI1   | -1.538321  |
| ESCO2    | -1.5916572 |
| ESD      | -2.5160446 |
| ESF1     | -0.1857853 |
| ESP1     | -3.108157  |
| ESP6     | -1.9855659 |
| ESPL1    | -0.5150206 |

|         |            |
|---------|------------|
| ESPN    | -1.9268322 |
| ESR1    | -4.361679  |
| ESRP2   | -2.82437   |
| ESRRA   | -1.5243683 |
| ESRRB   | -1.5100918 |
| ESRRG   | -2.6404388 |
| ESX1    | -2.4924257 |
| ETD     | -1.8781471 |
| ETFA    | -3.2560768 |
| ETFB    | -3.2749057 |
| ETFDH   | -3.7927923 |
| ETHE1   | -3.9201665 |
| ETNK2   | -8.284945  |
| ETNPPL  | -10.218514 |
| ETV2    | -1.6782606 |
| ETV4    | -0.8082016 |
| EVA1A   | -4.5098534 |
| EVC     | -0.5047534 |
| EVI5    | -2.2236114 |
| EVX1    | -1.8395631 |
| EXD1    | -1.493362  |
| EXOC3L  | -1.4423132 |
| EXOC3L2 | -4.505806  |
| EXOC6   | -0.7960997 |
| EXOC7   | -1.4814386 |
| EXOSC1  | -0.478163  |
| EXOSC2  | -1.2130685 |
| EXOSC4  | -2.1386728 |
| EXOSC5  | -1.5009494 |
| EXOSC7  | -1.0260506 |
| EXOSC9  | -2.0057096 |
| EXT1    | -1.5630116 |
| EXTL1   | -5.084634  |
| EXTL2   | -1.7795238 |
| EYA1    | -1.5754595 |
| F10     | -3.154902  |
| F11     | -8.651178  |
| F11R    | -0.4623981 |
| F12     | -14.362644 |
| F13B    | -12.013451 |
| F2      | -12.908922 |
| F2RL1   | -1.623456  |
| F2RL3   | -0.7318947 |
| F5      | -6.29021   |
| F7      | -4.0972776 |

|          |            |
|----------|------------|
| F8       | -4.597064  |
| F8A      | -1.9981861 |
| F9       | -6.346343  |
| FAAH     | -4.5550566 |
| FABP1    | -7.287378  |
| FABP2    | -8.139683  |
| FABP5    | -2.3343015 |
| FABP7    | -6.2754555 |
| FABP9    | -2.168936  |
| FADD     | -1.3151398 |
| FADDOS   | -2.7897897 |
| FADS1    | -4.350212  |
| FADS2    | -5.9603634 |
| FADS6    | -4.9703455 |
| FAF1     | -0.5334883 |
| FAF2     | -1.2048278 |
| FAH      | -6.0568657 |
| FAHD1    | -4.1689835 |
| FAHD2A   | -3.0038385 |
| FAM103A1 | -0.4036908 |
| FAM104A  | -0.4351015 |
| FAM107B  | -0.77632   |
| FAM109A  | -0.3924184 |
| FAM110B  | -0.5253286 |
| FAM114A1 | -1.3059616 |
| FAM114A2 | -1.1029625 |
| FAM115E  | -1.7901096 |
| FAM120A  | -1.012156  |
| FAM122B  | -0.3645239 |
| FAM122C  | -1.7735615 |
| FAM124A  | -2.357035  |
| FAM131B  | -1.3767965 |
| FAM131C  | -4.999118  |
| FAM134A  | -3.1336646 |
| FAM134C  | -1.3433924 |
| FAM135A  | -1.0591197 |
| FAM135B  | -2.2573676 |
| FAM136A  | -2.9162612 |
| FAM13A   | -0.7003508 |
| FAM149A  | -0.7562103 |
| FAM149B  | -0.4277391 |
| FAM150B  | -1.9590168 |
| FAM151B  | -0.7829373 |
| FAM155A  | -2.0064294 |
| FAM159B  | -2.090783  |

|          |            |
|----------|------------|
| FAM160B1 | -1.0579004 |
| FAM160B2 | -1.6109743 |
| FAM162A  | -1.4313126 |
| FAM163A  | -2.0957687 |
| FAM166A  | -2.06879   |
| FAM167B  | -3.851933  |
| FAM169A  | -2.1454208 |
| FAM169B  | -3.6716013 |
| FAM171A1 | -0.2091341 |
| FAM173A  | -1.7667437 |
| FAM173B  | -1.5531325 |
| FAM175A  | -0.5122511 |
| FAM180A  | -1.4434462 |
| FAM184B  | -2.0442784 |
| FAM185A  | -1.9726765 |
| FAM186B  | -2.080607  |
| FAM187A  | -2.5432522 |
| FAM187B  | -1.8193488 |
| FAM192A  | -0.5114837 |
| FAM193A  | -0.6549063 |
| FAM193B  | -0.5173845 |
| FAM195A  | -4.9111767 |
| FAM196B  | -2.2039225 |
| FAM198A  | -2.7526398 |
| FAM19A2  | -5.6365023 |
| FAM19A4  | -2.3589573 |
| FAM203A  | -1.3991222 |
| FAM204A  | -0.6971779 |
| FAM207A  | -1.0820465 |
| FAM20A   | -4.851198  |
| FAM20B   | -0.330904  |
| FAM20C   | -3.1283784 |
| FAM210A  | -1.716815  |
| FAM210B  | -2.9033184 |
| FAM213A  | -4.3274693 |
| FAM213B  | -3.0903058 |
| FAM214A  | -2.5761476 |
| FAM219A  | -2.0843964 |
| FAM221B  | -2.0336118 |
| FAM227B  | -2.0646744 |
| FAM228A  | -2.54013   |
| FAM228B  | -1.7941723 |
| FAM229B  | -0.4789176 |
| FAM25C   | -7.209132  |
| FAM26D   | -3.1479013 |

|          |            |
|----------|------------|
| FAM26F   | -1.0111046 |
| FAM32A   | -0.7440486 |
| FAM35A   | -3.4351916 |
| FAM3A    | -0.9993467 |
| FAM3C    | -0.8212452 |
| FAM43B   | -2.010219  |
| FAM45A   | -0.8757734 |
| FAM46A   | -1.5842457 |
| FAM46D   | -2.018087  |
| FAM47C   | -1.941474  |
| FAM47E   | -1.4173946 |
| FAM50A   | -0.406116  |
| FAM53A   | -0.91751   |
| FAM57B   | -1.0730383 |
| FAM58B   | -0.9949732 |
| FAM63A   | -1.4953899 |
| FAM64A   | -0.5002945 |
| FAM65C   | -1.1758509 |
| FAM69A   | -0.5187297 |
| FAM71A   | -2.0482981 |
| FAM71E2  | -1.8207037 |
| FAM71F1  | -1.8128002 |
| FAM72A   | -0.2293286 |
| FAM73B   | -3.0439305 |
| FAM83C   | -2.2080731 |
| FAM83D   | -1.7293377 |
| FAM83F   | -3.4466689 |
| FAM83G   | -0.3715191 |
| FAM83H   | -1.3384662 |
| FAM84B   | -0.4445717 |
| FAM86    | -1.4859934 |
| FAM89A   | -2.7645974 |
| FAM89B   | -0.294075  |
| FAM92A   | -0.9313397 |
| FAM96A   | -1.552227  |
| FAM98A   | -0.1975007 |
| FAM98C   | -0.8123975 |
| FAN1     | -1.4062443 |
| FANCA    | -0.4872263 |
| FANCB    | -1.2198653 |
| FANCC    | -0.3651447 |
| FANCD2   | -0.9837203 |
| FANCD2OS | -2.243964  |
| FANCE    | -0.7359543 |
| FANCF    | -1.7651112 |

|         |            |
|---------|------------|
| FANCI   | -1.1510518 |
| FANCL   | -0.7094979 |
| FANCM   | -1.0033779 |
| FAR2    | -0.6119096 |
| FAR2OS2 | -2.2331138 |
| FARP2   | -1.6337237 |
| FARS2   | -2.3774147 |
| FARSA   | -0.5332069 |
| FARSB   | -0.9494109 |
| FASN    | -2.643505  |
| FASTK   | -1.4354582 |
| FASTKD1 | -1.8224444 |
| FASTKD2 | -2.2873678 |
| FASTKD3 | -0.586802  |
| FASTKD5 | -1.0633082 |
| FATE1   | -2.2134023 |
| FAU     | -0.7273746 |
| FAXC    | -2.0923483 |
| FBLL1   | -1.8088977 |
| FBLN7   | -2.1167793 |
| FBP1    | -10.779409 |
| FBXL15  | -0.9816413 |
| FBXL17  | -1.4172239 |
| FBXL18  | -0.7265182 |
| FBXL21  | -1.9082391 |
| FBXL4   | -1.8356814 |
| FBXL6   | -1.2895088 |
| FBXL8   | -0.6736627 |
| FBXO16  | -0.8925612 |
| FBXO17  | -0.8068318 |
| FBXO18  | -0.5677524 |
| FBXO21  | -3.5126252 |
| FBXO22  | -1.4629135 |
| FBXO25  | -0.4145136 |
| FBXO3   | -1.893127  |
| FBXO31  | -1.4039416 |
| FBXO34  | -0.8912778 |
| FBXO36  | -0.6636448 |
| FBXO43  | -3.8468053 |
| FBXO48  | -2.1311655 |
| FBXO6   | -0.7836776 |
| FBXO7   | -0.5602355 |
| FBXO8   | -2.302166  |
| FBXO9   | -1.2665591 |
| FBXW13  | -1.4152975 |



|         |            |
|---------|------------|
| FBXW14  | -2.1070426 |
| FBXW16  | -1.8703046 |
| FBXW19  | -3.1213627 |
| FBXW20  | -0.4349625 |
| FBXW21  | -1.0023093 |
| FBXW22  | -1.7982106 |
| FBXW24  | -1.7673395 |
| FBXW26  | -4.5121665 |
| FBXW27  | -0.6249304 |
| FBXW4   | -0.417728  |
| FBXW5   | -1.3007369 |
| FBXW9   | -1.2013965 |
| FCF1    | -0.5727754 |
| FCGR2B  | -1.2999687 |
| FCGRT   | -3.4697242 |
| FCHSD2  | -0.4358683 |
| FCNA    | -6.631061  |
| FCNAOS  | -3.5474732 |
| FCRL5   | -1.3642707 |
| FCRL6   | -2.0364666 |
| FDFT1   | -3.570201  |
| FDPS    | -4.27346   |
| FDX1    | -1.549406  |
| FDX1L   | -1.4821434 |
| FDXACB1 | -1.971015  |
| FDXR    | -2.6123223 |
| FECH    | -2.5170774 |
| FEM1A   | -1.0691395 |
| FER1L5  | -2.2783875 |
| FER1L6  | -1.2082627 |
| FERMT2  | -0.4537072 |
| FETUB   | -8.022054  |
| FEZ1    | -0.9480763 |
| FEZ2    | -0.3791938 |
| FEZF1   | -2.0074549 |
| FEZF2   | -1.6047671 |
| FGA     | -10.777    |
| FGB     | -10.708057 |
| FGD1    | -1.2975736 |
| FGD2    | -1.3464022 |
| FGD6    | -0.892272  |
| FGF1    | -0.629777  |
| FGF14   | -1.871187  |
| FGF15   | -1.6576178 |
| FGF16   | -1.9897628 |

|         |            |
|---------|------------|
| FGF20   | -1.9402585 |
| FGF21   | -8.936005  |
| FGF2OS  | -2.2085042 |
| FGF5    | -2.360884  |
| FGF8    | -1.78037   |
| FGFR1OP | -0.4615922 |
| FGFR4   | -2.6868744 |
| FGFRL1  | -2.0814342 |
| FGG     | -9.45623   |
| FGGY    | -5.829015  |
| FGL1    | -10.154966 |
| FH1     | -2.7120528 |
| FHIT    | -2.3486152 |
| FHL4    | -2.207873  |
| FIBCD1  | -2.1381903 |
| FIBP    | -1.6776819 |
| FICD    | -0.8106675 |
| FIG4    | -0.7947125 |
| FIGLA   | -2.1512525 |
| FIGN    | -1.4140987 |
| FIGNL1  | -0.317862  |
| FITM1   | -3.3657951 |
| FITM2   | -2.348709  |
| FIZ1    | -0.9856772 |
| FKBP11  | -1.8475494 |
| FKBP1A  | -1.2529755 |
| FKBP2   | -1.2605214 |
| FKBP3   | -0.8099566 |
| FKBP4   | -2.0563412 |
| FKBP8   | -3.2508292 |
| FKBPL   | -0.7128353 |
| FKRP    | -0.5190387 |
| FLAD1   | -3.098637  |
| FLCN    | -0.4225225 |
| FLOT2   | -0.6434817 |
| FLRT1   | -3.0039012 |
| FLT4    | -2.4413657 |
| FLYWCH1 | -0.3744555 |
| FMN1    | -0.9117003 |
| FMN2    | -0.7838976 |
| FMO1    | -2.616364  |
| FMO3    | -3.5634584 |
| FMO4    | -4.202684  |
| FMO5    | -5.816068  |
| FMO6    | -1.9749653 |

|          |            |
|----------|------------|
| FMO9     | -2.0116758 |
| FMR1NB   | -1.7690654 |
| FN1      | -2.1159172 |
| FN3K     | -4.5973463 |
| FND3C2   | -2.15549   |
| FNDC3A   | -0.4912596 |
| FNDC3C1  | -3.054206  |
| FNDC4    | -4.871687  |
| FNIP2    | -1.337563  |
| FNTA     | -0.4052854 |
| FOCAD    | -0.8277779 |
| FOLR1    | -3.0478265 |
| FOLR2    | -3.7357836 |
| FOLR4    | -0.4185538 |
| FOPNL    | -1.0682421 |
| FOXA2    | -1.2539849 |
| FOXA3    | -8.956099  |
| FOXB1    | -1.4791603 |
| FOXB2    | -1.9748914 |
| FOXD1    | -2.0177367 |
| FOXD3    | -1.8802011 |
| FOXE1    | -2.701207  |
| FOXI1    | -1.5618122 |
| FOXM1    | -0.8933051 |
| FOXN1    | -2.2250152 |
| FOXO1    | -0.6443481 |
| FOXO4    | -0.3436894 |
| FOXP2    | -0.7137914 |
| FOXQ1    | -1.0923886 |
| FOXR2    | -2.297419  |
| FOXRED1  | -1.7717943 |
| FPGS     | -4.9549217 |
| FPGT     | -0.8873954 |
| FPR-RS3  | -1.6063151 |
| FPR-RS4  | -1.7228599 |
| FRA10AC1 | -1.776051  |
| FRAT1    | -2.5089493 |
| FREM2    | -0.4798179 |
| FREM3    | -1.5242884 |
| FRK      | -0.5733874 |
| FRMD3    | -1.9047074 |
| FRMD4B   | -0.4544623 |
| FRMD6    | -1.2174203 |
| FRMD8OS  | -1.460072  |
| FRMPD3   | -2.1480842 |

|           |            |
|-----------|------------|
| FRMPD4    | -1.5217655 |
| FRRS1     | -2.1631079 |
| FRRS1L    | -1.8180232 |
| FRS3      | -2.1731136 |
| FRZB      | -3.7733717 |
| FSBP      | -1.4028428 |
| FSCB      | -3.4640646 |
| FSHB      | -2.1191108 |
| FSHR      | -1.9258993 |
| FSIP2     | -1.5602417 |
| FST       | -1.263217  |
| FSTL4     | -1.6549225 |
| FSTL5     | -2.0506678 |
| FTCD      | -14.795364 |
| FTH1      | -1.1438375 |
| FTHL17    | -2.1105466 |
| FTL1      | -2.0095344 |
| FTO       | -0.7340126 |
| FTSJ1     | -0.8794794 |
| FTSJ2     | -2.4772027 |
| FUCA1     | -1.6728573 |
| FUK       | -1.0627189 |
| FUOM      | -3.5849566 |
| FURIN     | -1.1249037 |
| FUT1      | -1.3065319 |
| FUT10     | -1.1537077 |
| FUT4-PS1  | -2.27294   |
| FUT9      | -1.6850777 |
| FUZ       | -1.016726  |
| FXN       | -3.4011388 |
| FXD1      | -3.9058723 |
| FYCO1     | -0.8715382 |
| FYTTD1    | -0.7463749 |
| FZD10     | -2.0476112 |
| FZD7      | -0.3001614 |
| FZD8      | -1.4915042 |
| FZR1      | -0.7540484 |
| G0S2      | -4.11478   |
| G3BP2     | -0.4370866 |
| G6PC      | -11.948431 |
| GAA       | -1.4559035 |
| GABARAP   | -0.5944505 |
| GABARAPL1 | -1.5795159 |
| GABARAPL2 | -0.6741486 |
| GABBR2    | -2.3090088 |

|            |            |
|------------|------------|
| GABPA      | -0.2652206 |
| GABRA1     | -2.9542384 |
| GABRA3     | -0.9441822 |
| GABRA4     | -2.075278  |
| GABRA5     | -2.0417328 |
| GABRA6     | -2.157616  |
| GABRB1     | -2.6386743 |
| GABRB2     | -0.9768837 |
| GABRB3     | -1.9506721 |
| GABRD      | -1.9485736 |
| GABRG1     | -2.0724416 |
| GABRG3     | -2.0276206 |
| GABRQ      | -2.0988622 |
| GABRR1     | -4.4013376 |
| GABRR3     | -2.3406622 |
| GAD1       | -1.5085187 |
| GAD1OS     | -2.2856007 |
| GADD45GIP1 | -2.3421206 |
| GADL1      | -1.4960737 |
| GAK        | -1.1065583 |
| GAL3ST1    | -0.5714512 |
| GAL3ST2    | -1.6759744 |
| GAL3ST3    | -2.0649886 |
| GALE       | -2.5026565 |
| GALK1      | -3.4981627 |
| GALK2      | -0.9837465 |
| GALM       | -5.2756534 |
| GALNS      | -2.6184735 |
| GALNT10    | -1.1336923 |
| GALNT14    | -2.7902033 |
| GALNT2     | -0.7315488 |
| GALNT4     | -0.2825079 |
| GALNT5     | -1.1252444 |
| GALNT7     | -0.4340072 |
| GALNTL5    | -4.9404497 |
| GALNTL6    | -1.9582689 |
| GALP       | -0.543062  |
| GALR1      | -2.149103  |
| GALR2      | -2.0939698 |
| GALR3      | -2.0708945 |
| GALT       | -1.2196743 |
| GAMT       | -7.9428625 |
| GANAB      | -1.7169604 |
| GANC       | -1.4915752 |
| GAPDH      | -1.977098  |

|         |            |
|---------|------------|
| GAPDHS  | -1.0063932 |
| GAREM   | -3.3181658 |
| GAREML  | -0.9297521 |
| GART    | -0.8687964 |
| GAS1    | -1.1357331 |
| GAS2    | -5.131676  |
| GAS2L3  | -1.4768724 |
| GAS5    | -0.652555  |
| GAST    | -1.9388368 |
| GATA4   | -5.12706   |
| GATA5   | -1.3046281 |
| GATA5OS | -1.7309818 |
| GATAD1  | -0.8678641 |
| GATC    | -1.9101629 |
| GATM    | -1.3740053 |
| GATSL3  | -0.737767  |
| GBA     | -1.36864   |
| GBE1    | -3.0990658 |
| GBP11   | -2.9077983 |
| GBP2B   | -2.4318104 |
| GBP8    | -0.6240869 |
| GC      | -11.859707 |
| GCAT    | -5.7000246 |
| GCC2    | -0.6058188 |
| GCDH    | -5.8580456 |
| GCFC2   | -0.977078  |
| GCG     | -0.8517447 |
| GCGR    | -9.110204  |
| GCH1    | -2.0793567 |
| GCHFR   | -6.88943   |
| GCK     | -7.103181  |
| GCKR    | -12.01654  |
| GCLC    | -1.4845114 |
| GCLM    | -2.5762777 |
| GCN1L1  | -0.9672532 |
| GCNT3   | -1.4986899 |
| GCNT4   | -2.2317047 |
| GCNT7   | -2.1645632 |
| GCSH    | -3.5487351 |
| GDAP1   | -1.5722969 |
| GDAP1L1 | -1.0713673 |
| GDAP2   | -1.0689116 |
| GDAP5   | -1.6912744 |
| GDF1    | -0.4457033 |
| GDF10   | -2.978175  |

|        |            |
|--------|------------|
| GDF15  | -3.1687303 |
| GDF2   | -7.429308  |
| GDF3   | -0.634913  |
| GDF6   | -2.2132533 |
| GDF7   | -1.3049495 |
| GDI2   | -0.9940181 |
| GDPGP1 | -1.3974118 |
| GEMIN2 | -2.2064142 |
| GEMIN4 | -0.5983057 |
| GEMIN5 | -1.1211138 |
| GEMIN6 | -1.4518154 |
| GEMIN7 | -0.6272903 |
| GEMIN8 | -0.330014  |
| GEN1   | -0.3349242 |
| GFER   | -2.094019  |
| GFM1   | -1.9088335 |
| GFM2   | -1.8145804 |
| GFOD1  | -2.1793647 |
| GFRA1  | -4.482653  |
| GFRA2  | -0.1898465 |
| GFRAL  | -2.0035367 |
| GFY    | -1.0894959 |
| GGA1   | -1.3786287 |
| GGA2   | -1.6233997 |
| GGACT  | -3.300627  |
| GGCT   | -1.1548767 |
| GGCX   | -2.7960196 |
| GGH    | -0.4617338 |
| GGNBP1 | -3.2973955 |
| GGNBP2 | -0.585309  |
| GGT6   | -5.448353  |
| GH     | -2.3513498 |
| GHDC   | -1.7812839 |
| GHITM  | -1.5993485 |
| GHR    | -3.6781225 |
| GHRHR  | -1.6625535 |
| GHSR   | -2.0480556 |
| GID4   | -0.4359303 |
| GID8   | -0.7415476 |
| GIGYF1 | -0.2789083 |
| GIGYF2 | -0.476223  |
| GIMAP9 | -0.7988358 |
| GIN1   | -1.1125948 |
| GINS1  | -1.4862609 |
| GINS2  | -1.6428351 |

|          |            |
|----------|------------|
| GIN54    | -0.8453322 |
| GIP      | -1.4146421 |
| GIPC1    | -0.7750988 |
| GJA10    | -1.9550929 |
| GJA6     | -1.527792  |
| GJB1     | -8.612889  |
| GJB2     | -6.3641624 |
| GJB5     | -3.468816  |
| GJD2     | -3.054448  |
| GJD4     | -2.2028341 |
| GJE1     | -1.9286222 |
| GKAP1    | -0.7589293 |
| GKN1     | -1.5460696 |
| GKN2     | -2.1243432 |
| GLB1     | -1.5666938 |
| GLCE     | -2.274097  |
| GLDC     | -8.312485  |
| GLDN     | -7.544739  |
| GLE1     | -0.7909236 |
| GLI2     | -2.4956377 |
| GLIPR1L2 | -2.2358027 |
| GLIS1    | -0.7676411 |
| GLMN     | -1.2748013 |
| GLO1     | -3.6212997 |
| GLOD4    | -1.6710367 |
| GLOD5    | -3.0108588 |
| GLRA1    | -2.0784268 |
| GLRA2    | -2.0884414 |
| GLRA3    | -2.24363   |
| GLRA4    | -2.1242537 |
| GLRB     | -2.3709981 |
| GLRX     | -1.1423283 |
| GLRX2    | -1.0467429 |
| GLRX3    | -1.1313968 |
| GLRX5    | -2.9243546 |
| GLS2     | -9.728603  |
| GLT1D1   | -4.3798423 |
| GLT25D1  | -0.6481714 |
| GLT28D2  | -1.2507863 |
| GLT6D1   | -2.1277795 |
| GLTPD1   | -2.6419551 |
| GLTPD2   | -12.942047 |
| GLTSCR2  | -0.5686798 |
| GLUD1    | -3.0904994 |
| GLUL     | -1.4345517 |



|         |            |
|---------|------------|
| GLYAT   | -11.649736 |
| GLYATL3 | -2.0602956 |
| GLYCAM1 | -1.5271611 |
| GLYCTK  | -7.7033815 |
| GLYR1   | -0.9531655 |
| GM10007 | -2.1683078 |
| GM10015 | -0.5703058 |
| GM10023 | -2.2343936 |
| GM10024 | -2.0538619 |
| GM10030 | -2.5960371 |
| GM10033 | -1.3633611 |
| GM10057 | -2.3169575 |
| GM10094 | -0.6407132 |
| GM10101 | -0.5530415 |
| GM10113 | -1.6591496 |
| GM10134 | -1.0988445 |
| GM10143 | -2.1121836 |
| GM10165 | -2.0223844 |
| GM10176 | -2.3264794 |
| GM10199 | -1.1648884 |
| GM10209 | -3.643524  |
| GM10220 | -2.6112862 |
| GM10248 | -1.9191623 |
| GM10252 | -1.574058  |
| GM10265 | -2.141709  |
| GM10266 | -2.2025528 |
| GM10267 | -2.0067008 |
| GM10272 | -0.6768038 |
| GM10276 | -2.8174188 |
| GM10277 | -1.8741727 |
| GM10280 | -2.22553   |
| GM10286 | -0.3561833 |
| GM10287 | -1.2846026 |
| GM10318 | -0.7388477 |
| GM10319 | -4.8240232 |
| GM10334 | -0.2799587 |
| GM10367 | -2.9701338 |
| GM10369 | -2.4104896 |
| GM10372 | -1.4318225 |
| GM10373 | -2.1334906 |
| GM10387 | -2.3712025 |
| GM10398 | -1.7250147 |
| GM10405 | -1.7952776 |
| GM10408 | -1.603307  |
| GM10413 | -1.0644879 |

|         |            |
|---------|------------|
| GM10415 | -2.1124253 |
| GM10419 | -0.7813227 |
| GM10420 | -1.3703885 |
| GM10421 | -2.1789417 |
| GM10426 | -2.2768154 |
| GM1043  | -1.1461427 |
| GM10432 | -2.0615623 |
| GM10433 | -2.9917073 |
| GM10435 | -1.4631314 |
| GM10436 | -0.9789124 |
| GM10437 | -1.8439136 |
| GM10439 | -1.4310591 |
| GM10440 | -1.8480408 |
| GM10441 | -2.1795723 |
| GM1045  | -1.9361486 |
| GM10450 | -1.8669741 |
| GM10459 | -1.8578112 |
| GM10465 | -2.2171056 |
| GM10466 | -2.9173858 |
| GM10468 | -1.8655331 |
| GM10469 | -2.2467196 |
| GM10471 | -1.6640792 |
| GM10473 | -2.025542  |
| GM10475 | -1.5562105 |
| GM10482 | -1.8774514 |
| GM10487 | -2.1984377 |
| GM10489 | -2.192984  |
| GM10493 | -1.6491084 |
| GM10494 | -2.0347357 |
| GM10501 | -1.456094  |
| GM10505 | -3.469098  |
| GM10509 | -0.3116391 |
| GM10512 | -2.0680892 |
| GM10513 | -1.5783882 |
| GM10516 | -1.313668  |
| GM10531 | -2.8763745 |
| GM10535 | -2.2178493 |
| GM10544 | -2.1281903 |
| GM10548 | -1.0811205 |
| GM10549 | -2.2559977 |
| GM10555 | -2.2282228 |
| GM10556 | -4.0913134 |
| GM10560 | -1.1854918 |
| GM10568 | -2.221794  |
| GM10578 | -2.301672  |

|         |            |
|---------|------------|
| GM10579 | -1.9558208 |
| GM10603 | -3.7455854 |
| GM10614 | -2.014687  |
| GM10616 | -1.689729  |
| GM10620 | -2.15937   |
| GM10623 | -2.2779715 |
| GM10624 | -1.4751377 |
| GM10627 | -1.9155664 |
| GM10632 | -2.0741339 |
| GM10635 | -1.923429  |
| GM10636 | -2.067427  |
| GM10637 | -2.2182307 |
| GM10639 | -3.2862597 |
| GM10640 | -1.6071322 |
| GM10641 | -2.1610157 |
| GM10649 | -2.0439453 |
| GM10651 | -1.0350027 |
| GM10652 | -2.063487  |
| GM10658 | -6.0024014 |
| GM10667 | -2.1504655 |
| GM10677 | -2.087165  |
| GM10680 | -7.5105343 |
| GM10682 | -2.3657973 |
| GM10683 | -2.3099656 |
| GM10687 | -0.3241315 |
| GM10688 | -1.8995099 |
| GM10690 | -2.2244985 |
| GM10696 | -0.5901032 |
| GM10701 | -2.1983833 |
| GM10703 | -0.7255354 |
| GM10706 | -1.7426422 |
| GM10714 | -2.6487021 |
| GM10723 | -1.8828158 |
| GM10724 | -2.051895  |
| GM10727 | -1.7991514 |
| GM10730 | -2.2793803 |
| GM10732 | -0.8595233 |
| GM10733 | -2.2183452 |
| GM10734 | -3.4806645 |
| GM10739 | -2.1501367 |
| GM10741 | -0.7195914 |
| GM10743 | -2.2673616 |
| GM10744 | -2.6109128 |
| GM10745 | -1.9401071 |
| GM10748 | -1.6385174 |

|         |            |
|---------|------------|
| GM10752 | -5.2194223 |
| GM10757 | -2.060698  |
| GM10759 | -0.3993881 |
| GM10763 | -2.1702933 |
| GM10764 | -2.1871853 |
| GM10766 | -1.1504161 |
| GM10767 | -0.5365777 |
| GM10768 | -11.138817 |
| GM10773 | -1.5586255 |
| GM10776 | -2.6444676 |
| GM10779 | -2.4580078 |
| GM10782 | -1.936862  |
| GM10785 | -0.6967967 |
| GM10787 | -2.1451228 |
| GM10790 | -3.3544693 |
| GM10811 | -2.0568736 |
| GM10814 | -1.604707  |
| GM10815 | -1.3604665 |
| GM10822 | -2.295817  |
| GM10823 | -1.9487753 |
| GM10824 | -1.1058657 |
| GM10825 | -2.0447993 |
| GM10826 | -2.177523  |
| GM10827 | -4.347002  |
| GM10829 | -2.0007145 |
| GM10830 | -2.4914532 |
| GM10831 | -2.0241432 |
| GM10832 | -2.3592026 |
| GM10835 | -0.2419317 |
| GM10836 | -2.7946224 |
| GM10845 | -0.4415984 |
| GM10846 | -2.1294935 |
| GM10848 | -2.3104744 |
| GM10854 | -2.2407231 |
| GM10857 | -1.8665295 |
| GM10860 | -0.700397  |
| GM10862 | -2.1176188 |
| GM10863 | -1.2735004 |
| GM10865 | -0.5888419 |
| GM10869 | -2.5282602 |
| GM10873 | -1.9153142 |
| GM10876 | -2.0683737 |
| GM10910 | -1.5175996 |
| GM10914 | -1.4687953 |
| GM11033 | -3.9187646 |

|         |            |
|---------|------------|
| GM11054 | -2.1607583 |
| GM1110  | -1.5076265 |
| GM11127 | -1.4342294 |
| GM11159 | -2.1399274 |
| GM11201 | -2.2219543 |
| GM11223 | -0.3143892 |
| GM1123  | -0.3516839 |
| GM11240 | -3.2633953 |
| GM11266 | -1.6974852 |
| GM11292 | -2.1756005 |
| GM11381 | -2.5802822 |
| GM1140  | -2.8901412 |
| GM1141  | -0.9124739 |
| GM11426 | -2.0298028 |
| GM11437 | -6.623513  |
| GM11468 | -1.9091101 |
| GM11492 | -2.566285  |
| GM11497 | -1.7296722 |
| GM11529 | -2.3470526 |
| GM11538 | -2.0612373 |
| GM11541 | -3.139015  |
| GM11544 | -1.6264162 |
| GM11545 | -1.9010811 |
| GM11546 | -2.6293683 |
| GM11554 | -2.0702116 |
| GM11563 | -2.158302  |
| GM11565 | -2.0073946 |
| GM11568 | -2.1313233 |
| GM11570 | -1.6615565 |
| GM11595 | -1.0992286 |
| GM11681 | -2.1179223 |
| GM11691 | -0.9684894 |
| GM11710 | -1.6723907 |
| GM11757 | -1.1773884 |
| GM11780 | -2.2232323 |
| GM11783 | -1.6988754 |
| GM11810 | -0.4309712 |
| GM11937 | -1.0826461 |
| GM12000 | -2.0755522 |
| GM12052 | -1.7812388 |
| GM12059 | -2.1498861 |
| GM12108 | -1.8179932 |
| GM12128 | -2.1106024 |
| GM12169 | -2.0017567 |
| GM12171 | -1.7233129 |

|         |            |
|---------|------------|
| GM12247 | -1.9456053 |
| GM12258 | -1.7115517 |
| GM12298 | -0.792939  |
| GM12302 | -3.4233103 |
| GM12371 | -2.1223264 |
| GM12408 | -2.0342488 |
| GM12447 | -0.5656881 |
| GM12503 | -2.8343122 |
| GM12511 | -1.9519196 |
| GM12522 | -0.3108122 |
| GM12526 | -1.7892017 |
| GM12542 | -2.707386  |
| GM12580 | -1.6166451 |
| GM12603 | -2.1450262 |
| GM12618 | -0.6102057 |
| GM12670 | -2.106265  |
| GM12693 | -0.8481011 |
| GM12703 | -3.9609067 |
| GM12758 | -1.3638523 |
| GM12794 | -1.9513426 |
| GM12816 | -0.4185596 |
| GM12830 | -2.2394192 |
| GM12863 | -2.1611052 |
| GM12886 | -1.6252134 |
| GM12887 | -2.115766  |
| GM12888 | -2.2454386 |
| GM12942 | -1.4532962 |
| GM12945 | -1.8175654 |
| GM12992 | -1.8596768 |
| GM13011 | -1.5218186 |
| GM13023 | -2.2670941 |
| GM13043 | -2.0668848 |
| GM13051 | -2.4741626 |
| GM13078 | -1.9032416 |
| GM13083 | -1.8503342 |
| GM13084 | -2.1561508 |
| GM13088 | -1.9909704 |
| GM13089 | -3.4143786 |
| GM13103 | -2.0722966 |
| GM13111 | -1.7525306 |
| GM13112 | -1.5627108 |
| GM13119 | -1.9739695 |
| GM13124 | -2.265609  |
| GM13128 | -3.7398822 |
| GM13177 | -2.2873683 |

|         |            |
|---------|------------|
| GM13180 | -1.6468472 |
| GM13194 | -1.3358727 |
| GM13202 | -1.8879104 |
| GM13205 | -1.8190544 |
| GM13215 | -0.3237133 |
| GM13219 | -2.1215882 |
| GM1322  | -3.485881  |
| GM13247 | -0.1959157 |
| GM13429 | -2.3783684 |
| GM13446 | -2.0346396 |
| GM13522 | -3.9647021 |
| GM13582 | -2.4602628 |
| GM136   | -2.0343533 |
| GM13629 | -2.274372  |
| GM13710 | -2.3326032 |
| GM13749 | -2.102668  |
| GM13770 | -2.518978  |
| GM13777 | -0.9466944 |
| GM13807 | -3.3246918 |
| GM13826 | -0.505055  |
| GM13939 | -2.088593  |
| GM13999 | -2.1780531 |
| GM14015 | -5.154684  |
| GM14025 | -0.6370637 |
| GM14124 | -1.8405662 |
| GM14129 | -2.2223246 |
| GM14137 | -1.9988108 |
| GM14149 | -1.969007  |
| GM14151 | -3.5242298 |
| GM14164 | -2.233773  |
| GM14288 | -0.9570375 |
| GM14325 | -0.7075877 |
| GM14326 | -0.4723558 |
| GM14340 | -2.4457536 |
| GM14347 | -2.2602048 |
| GM14374 | -1.9202456 |
| GM14431 | -0.4729767 |
| GM14440 | -0.6456528 |
| GM14443 | -0.5474763 |
| GM14483 | -1.7207935 |
| GM14484 | -2.0241842 |
| GM14486 | -1.4322984 |
| GM14496 | -4.8081136 |
| GM14499 | -0.6798987 |
| GM14634 | -0.7456656 |

|         |            |
|---------|------------|
| GM14661 | -2.069397  |
| GM14703 | -2.113548  |
| GM14725 | -2.1022508 |
| GM14743 | -2.268476  |
| GM14812 | -2.0878048 |
| GM14851 | -2.4947004 |
| GM15032 | -0.6355076 |
| GM15085 | -2.0578575 |
| GM15104 | -1.8855495 |
| GM15130 | -1.7048492 |
| GM15217 | -0.4577382 |
| GM15246 | -2.110324  |
| GM1527  | -2.2555985 |
| GM15328 | -1.9340057 |
| GM15386 | -2.22568   |
| GM15401 | -2.09962   |
| GM15411 | -4.0817404 |
| GM15412 | -2.1614742 |
| GM15417 | -0.9179697 |
| GM15441 | -2.1274374 |
| GM15478 | -1.4043577 |
| GM15482 | -1.6653545 |
| GM15498 | -1.7446833 |
| GM15506 | -1.8169184 |
| GM15514 | -2.4016747 |
| GM1553  | -2.0385678 |
| GM156   | -1.626647  |
| GM15628 | -2.0172899 |
| GM1564  | -2.7836936 |
| GM15688 | -2.2216017 |
| GM15706 | -1.2466514 |
| GM15762 | -1.6800456 |
| GM15850 | -2.1562254 |
| GM1587  | -2.0759661 |
| GM16039 | -1.5997753 |
| GM1604B | -2.9447591 |
| GM16062 | -0.4628942 |
| GM16223 | -2.537418  |
| GM16294 | -2.123219  |
| GM16367 | -2.118938  |
| GM16381 | -0.5675569 |
| GM16390 | -1.5349822 |
| GM16432 | -2.0377092 |
| GM16442 | -2.215508  |
| GM16487 | -1.95261   |



|         |            |
|---------|------------|
| GM16489 | -2.00612   |
| GM16491 | -1.0914512 |
| GM16495 | -2.1448195 |
| GM16496 | -2.2116523 |
| GM16497 | -2.9000874 |
| GM16498 | -1.4280989 |
| GM16499 | -2.2809162 |
| GM16501 | -1.987231  |
| GM16505 | -0.4192395 |
| GM16508 | -1.4818294 |
| GM16509 | -2.201549  |
| GM16525 | -2.353748  |
| GM16527 | -2.3375845 |
| GM16532 | -2.1432965 |
| GM16686 | -1.5450583 |
| GM16853 | -0.3012669 |
| GM1698  | -1.1682165 |
| GM17739 | -1.789603  |
| GM17745 | -3.8606079 |
| GM17748 | -0.3612175 |
| GM17751 | -2.117887  |
| GM17753 | -1.8254066 |
| GM17764 | -1.0351238 |
| GM17767 | -1.5837569 |
| GM17783 | -2.3206391 |
| GM19668 | -1.5429828 |
| GM1968  | -0.7380228 |
| GM19840 | -0.1756039 |
| GM20056 | -1.3759384 |
| GM2011  | -1.3952086 |
| GM20604 | -0.4687138 |
| GM2061  | -0.8612871 |
| GM20736 | -2.1829848 |
| GM20740 | -0.9693637 |
| GM20746 | -2.5567093 |
| GM20747 | -2.5637593 |
| GM20754 | -2.1193376 |
| GM20755 | -2.2747674 |
| GM20757 | -2.2008314 |
| GM20758 | -2.1438367 |
| GM20764 | -0.2523427 |
| GM20783 | -2.1674914 |
| GM20806 | -2.0726247 |
| GM20822 | -2.1102293 |
| GM20837 | -2.4694424 |

|         |            |
|---------|------------|
| GM2085  | -2.9103317 |
| GM20867 | -2.373186  |
| GM20877 | -2.0785208 |
| GM20918 | -2.0863576 |
| GM20939 | -0.3662458 |
| GM21064 | -2.1934938 |
| GM2109  | -2.231615  |
| GM21276 | -2.031717  |
| GM2128  | -2.2199101 |
| GM21292 | -1.5019236 |
| GM21319 | -2.2319036 |
| GM2138  | -2.4657977 |
| GM21404 | -2.560567  |
| GM21464 | -1.3094244 |
| GM21498 | -1.8061559 |
| GM21559 | -0.7907958 |
| GM21637 | -2.012425  |
| GM2164  | -2.216341  |
| GM22    | -0.6378872 |
| GM2233  | -2.306812  |
| GM2240  | -0.7937963 |
| GM2270  | -2.098588  |
| GM2379  | -1.3935285 |
| GM2382  | -0.8675771 |
| GM2436  | -0.9839387 |
| GM2464  | -2.2405689 |
| GM2483  | -2.164126  |
| GM2491  | -1.9078989 |
| GM2516  | -3.3369598 |
| GM2545  | -0.6135359 |
| GM2560  | -1.9281452 |
| GM2582  | -1.886353  |
| GM266   | -0.5599697 |
| GM2670  | -2.83767   |
| GM2675  | -1.6922011 |
| GM2693  | -2.2173703 |
| GM2716  | -1.4591408 |
| GM2795  | -1.7939658 |
| GM2800  | -1.441978  |
| GM2814  | -3.8187032 |
| GM2933  | -5.1514826 |
| GM2984  | -2.0244036 |
| GM2990  | -2.0693536 |
| GM2A    | -2.5987859 |
| GM3014  | -0.8929675 |

|        |            |
|--------|------------|
| GM3045 | -1.5817432 |
| GM3052 | -2.30161   |
| GM3134 | -2.5009296 |
| GM3143 | -2.0143442 |
| GM3230 | -0.5262044 |
| GM3234 | -1.9522219 |
| GM3238 | -0.7833772 |
| GM3258 | -0.5283942 |
| GM3279 | -1.5474877 |
| GM3285 | -0.9031985 |
| GM3287 | -2.112866  |
| GM3317 | -1.1332402 |
| GM3331 | -1.6285086 |
| GM3336 | -1.055906  |
| GM3367 | -1.4266994 |
| GM3404 | -1.781163  |
| GM3448 | -1.2843933 |
| GM3453 | -2.0824127 |
| GM3458 | -2.005861  |
| GM3470 | -1.4825625 |
| GM3474 | -2.2287226 |
| GM3509 | -1.8020036 |
| GM3510 | -1.7140582 |
| GM3519 | -2.0577948 |
| GM355  | -3.2126026 |
| GM3561 | -0.3021426 |
| GM362  | -1.8527977 |
| GM364  | -2.1954856 |
| GM3646 | -1.973666  |
| GM3669 | -2.129632  |
| GM3693 | -2.2257907 |
| GM3696 | -1.5439043 |
| GM3704 | -3.0373292 |
| GM3728 | -2.0611615 |
| GM3740 | -1.7837837 |
| GM3763 | -2.2663336 |
| GM3772 | -2.157771  |
| GM3775 | -2.2486665 |
| GM3776 | -3.4740117 |
| GM3805 | -2.0977287 |
| GM382  | -1.437845  |
| GM3822 | -1.8149097 |
| GM3830 | -4.468439  |
| GM3831 | -2.0233922 |
| GM3858 | -1.1963778 |

|        |            |
|--------|------------|
| GM3877 | -1.9804368 |
| GM3907 | -1.746758  |
| GM3942 | -1.3064144 |
| GM3948 | -2.3417046 |
| GM3960 | -2.1240435 |
| GM3961 | -2.028786  |
| GM3970 | -1.2083006 |
| GM3985 | -2.2725244 |
| GM4013 | -2.1171467 |
| GM4022 | -1.5351334 |
| GM4035 | -1.1695843 |
| GM4081 | -2.2165554 |
| GM4098 | -1.3429432 |
| GM4117 | -2.8108394 |
| GM4130 | -0.9815888 |
| GM4131 | -4.000696  |
| GM4132 | -0.1628707 |
| GM4201 | -2.3370867 |
| GM4208 | -1.2955382 |
| GM4211 | -1.6915698 |
| GM4230 | -0.8324668 |
| GM4241 | -1.7417946 |
| GM4251 | -1.960145  |
| GM4278 | -1.8062341 |
| GM4279 | -2.615914  |
| GM4281 | -2.09081   |
| GM4285 | -1.9633017 |
| GM4297 | -2.203451  |
| GM4303 | -3.1374977 |
| GM4319 | -2.2266917 |
| GM4340 | -0.962359  |
| GM4342 | -0.8044372 |
| GM438  | -0.7518828 |
| GM4402 | -3.5057373 |
| GM4419 | -1.1288602 |
| GM4454 | -2.1932223 |
| GM4466 | -1.1943958 |
| GM4489 | -2.778205  |
| GM4491 | -1.5725255 |
| GM4524 | -1.4674208 |
| GM4532 | -1.0504777 |
| GM4567 | -2.136315  |
| GM4593 | -0.4035592 |
| GM4606 | -2.0134676 |
| GM4632 | -2.0485957 |

|        |            |
|--------|------------|
| GM4633 | -1.4811025 |
| GM4651 | -2.1223166 |
| GM4657 | -1.9724836 |
| GM4663 | -1.8490846 |
| GM4665 | -2.2301455 |
| GM4668 | -1.7808816 |
| GM4673 | -0.5719385 |
| GM4710 | -1.1372192 |
| GM4718 | -2.2378364 |
| GM4736 | -0.8559873 |
| GM4755 | -1.3300757 |
| GM4758 | -2.088755  |
| GM4763 | -2.6745949 |
| GM4776 | -2.0547519 |
| GM4786 | -0.9076877 |
| GM4787 | -1.1754043 |
| GM4788 | -4.7787566 |
| GM4791 | -1.7095351 |
| GM4792 | -2.0629709 |
| GM4794 | -6.951085  |
| GM4802 | -0.8447418 |
| GM4841 | -2.1927762 |
| GM4847 | -2.1486928 |
| GM4858 | -2.0360985 |
| GM4862 | -3.0348    |
| GM4868 | -2.1883478 |
| GM4872 | -2.0981748 |
| GM4876 | -2.7977247 |
| GM4881 | -1.7681048 |
| GM4889 | -0.5190706 |
| GM4894 | -2.0853834 |
| GM4906 | -1.9241083 |
| GM4922 | -0.5623887 |
| GM4937 | -2.0673137 |
| GM4951 | -1.2255139 |
| GM4952 | -12.935814 |
| GM4963 | -0.5300064 |
| GM4969 | -0.4111178 |
| GM4975 | -0.5727236 |
| GM4980 | -1.5178258 |
| GM4988 | -1.9385424 |
| GM4994 | -1.6635463 |
| GM4997 | -0.5673814 |
| GM5    | -1.2776556 |
| GM5067 | -2.0909917 |

|        |            |
|--------|------------|
| GM5072 | -2.208889  |
| GM5079 | -1.6164875 |
| GM5083 | -1.9545536 |
| GM5087 | -2.1764212 |
| GM5089 | -2.398176  |
| GM5091 | -2.3392189 |
| GM5093 | -0.7934506 |
| GM5094 | -2.131291  |
| GM5095 | -1.3742466 |
| GM5099 | -2.0352864 |
| GM5108 | -1.9656415 |
| GM5112 | -1.7584307 |
| GM5114 | -1.8304379 |
| GM5118 | -2.1904168 |
| GM5122 | -2.0748925 |
| GM5132 | -2.27603   |
| GM5134 | -1.8495138 |
| GM5142 | -2.293767  |
| GM5148 | -1.9611118 |
| GM5155 | -2.0892036 |
| GM5294 | -0.749563  |
| GM5296 | -1.0493007 |
| GM53   | -2.2042274 |
| GM534  | -2.0573645 |
| GM5346 | -2.6015463 |
| GM5347 | -2.1175969 |
| GM5382 | -1.343688  |
| GM5414 | -2.274317  |
| GM5420 | -2.2085025 |
| GM5427 | -2.2389226 |
| GM5429 | -2.1843083 |
| GM5432 | -2.0647678 |
| GM5441 | -1.0915818 |
| GM5445 | -0.3352523 |
| GM5447 | -1.1905665 |
| GM5453 | -0.4916253 |
| GM5458 | -0.4734395 |
| GM5460 | -2.1475208 |
| GM5468 | -1.5204458 |
| GM5475 | -1.0664835 |
| GM5477 | -2.0677161 |
| GM5478 | -3.0304196 |
| GM5493 | -2.057594  |
| GM550  | -2.1887848 |
| GM5523 | -1.6412101 |

|        |            |
|--------|------------|
| GM5524 | -9.190998  |
| GM5526 | -0.6268616 |
| GM5528 | -0.2443047 |
| GM553  | -1.8215287 |
| GM5531 | -3.5473955 |
| GM5533 | -2.9613252 |
| GM5538 | -2.228336  |
| GM5544 | -2.0667663 |
| GM5549 | -2.5717306 |
| GM5553 | -0.9675877 |
| GM5563 | -2.0691056 |
| GM5577 | -2.1705265 |
| GM5585 | -3.8642945 |
| GM5589 | -2.1322644 |
| GM5591 | -2.0652404 |
| GM5592 | -2.141291  |
| GM5593 | -1.3210092 |
| GM5600 | -1.5576987 |
| GM5606 | -1.881392  |
| GM561  | -1.6445241 |
| GM5615 | -2.283779  |
| GM5617 | -2.8357024 |
| GM5622 | -3.5380893 |
| GM5627 | -1.8998904 |
| GM5635 | -1.618139  |
| GM5636 | -2.1060207 |
| GM567  | -2.0886605 |
| GM5709 | -2.1119564 |
| GM5712 | -2.3286712 |
| GM5724 | -2.0765197 |
| GM5737 | -1.9711866 |
| GM5741 | -1.0886493 |
| GM5755 | -2.1161819 |
| GM5766 | -0.8382359 |
| GM5767 | -2.085626  |
| GM5771 | -2.1406312 |
| GM5779 | -1.1624789 |
| GM5782 | -1.767143  |
| GM5785 | -0.4641471 |
| GM5792 | -1.812316  |
| GM5795 | -0.6465757 |
| GM5801 | -1.0261316 |
| GM5848 | -0.9904518 |
| GM5849 | -2.4900544 |
| GM5879 | -0.6653228 |

|        |            |
|--------|------------|
| GM5891 | -2.1518388 |
| GM5897 | -2.2037847 |
| GM5907 | -2.2864475 |
| GM5908 | -1.0317116 |
| GM5916 | -2.0250778 |
| GM5922 | -2.2294312 |
| GM5925 | -2.0286899 |
| GM5934 | -1.8950896 |
| GM5938 | -2.0837343 |
| GM5941 | -1.7791038 |
| GM595  | -3.5221338 |
| GM5953 | -1.5243163 |
| GM597  | -1.6289465 |
| GM6040 | -2.088262  |
| GM6042 | -1.7713959 |
| GM6083 | -1.7346582 |
| GM6086 | -2.1011715 |
| GM609  | -1.4922538 |
| GM6093 | -2.075549  |
| GM6109 | -0.223836  |
| GM6117 | -2.09328   |
| GM6124 | -2.0996714 |
| GM6145 | -1.9293652 |
| GM6150 | -2.361379  |
| GM6155 | -0.9246588 |
| GM6195 | -0.4542947 |
| GM6209 | -1.1254945 |
| GM6211 | -0.2882552 |
| GM6213 | -1.9676611 |
| GM6219 | -1.0697935 |
| GM6238 | -1.290276  |
| GM6249 | -2.0690722 |
| GM6251 | -1.0436163 |
| GM626  | -1.8421693 |
| GM6260 | -2.3263993 |
| GM6268 | -1.0307312 |
| GM6288 | -2.093403  |
| GM6289 | -2.1063557 |
| GM6297 | -2.7268844 |
| GM6313 | -2.127991  |
| GM6328 | -0.6608434 |
| GM6360 | -1.8167717 |
| GM6404 | -0.3586869 |
| GM6406 | -2.2170136 |
| GM6410 | -2.1179333 |



|        |            |
|--------|------------|
| GM6432 | -2.0275643 |
| GM6436 | -1.5635598 |
| GM6444 | -2.0189223 |
| GM6460 | -1.645786  |
| GM6471 | -2.3053641 |
| GM648  | -1.928483  |
| GM6484 | -7.966068  |
| GM6498 | -2.4576402 |
| GM6525 | -0.7335339 |
| GM6548 | -1.5642104 |
| GM6559 | -2.188727  |
| GM6566 | -1.3117313 |
| GM6578 | -0.7232814 |
| GM6588 | -2.181803  |
| GM6590 | -1.6007643 |
| GM6598 | -0.9798362 |
| GM6600 | -2.0063627 |
| GM6607 | -0.4306197 |
| GM6614 | -4.0322084 |
| GM6634 | -2.2976704 |
| GM6639 | -1.6826291 |
| GM6653 | -1.6339438 |
| GM6658 | -1.8944035 |
| GM6687 | -2.1643791 |
| GM6710 | -0.2791762 |
| GM6744 | -2.1446347 |
| GM6787 | -1.2934384 |
| GM6818 | -2.3573892 |
| GM6867 | -0.378438  |
| GM6878 | -2.100212  |
| GM6890 | -1.9975083 |
| GM6899 | -0.9267733 |
| GM6921 | -1.3910613 |
| GM6927 | -2.0614092 |
| GM6938 | -2.1847582 |
| GM6943 | -1.3156872 |
| GM6958 | -2.0838327 |
| GM6961 | -2.3211262 |
| GM6980 | -2.0733602 |
| GM6981 | -2.6319432 |
| GM6987 | -1.7717159 |
| GM6994 | -1.7650733 |
| GM6999 | -2.130631  |
| GM7008 | -1.2767107 |
| GM7073 | -1.6721685 |

|        |            |
|--------|------------|
| GM7102 | -0.4591703 |
| GM7120 | -2.407657  |
| GM7133 | -2.0443964 |
| GM7134 | -0.6338182 |
| GM7135 | -1.932807  |
| GM715  | -0.7992952 |
| GM7157 | -1.9890218 |
| GM7160 | -0.6130853 |
| GM7167 | -2.2270713 |
| GM7241 | -1.0244818 |
| GM725  | -1.5086775 |
| GM7256 | -2.8270154 |
| GM7257 | -2.262957  |
| GM7271 | -2.0780919 |
| GM7276 | -2.2091866 |
| GM732  | -1.5306215 |
| GM7325 | -2.2125564 |
| GM7444 | -1.6016324 |
| GM7457 | -2.3481047 |
| GM7489 | -2.057384  |
| GM7534 | -2.6652207 |
| GM7538 | -2.6675272 |
| GM7544 | -0.3673229 |
| GM7550 | -1.6194282 |
| GM7562 | -1.7763052 |
| GM7596 | -2.3154798 |
| GM7607 | -2.1373782 |
| GM7616 | -2.6158867 |
| GM7628 | -2.071921  |
| GM7634 | -0.5519576 |
| GM766  | -2.2734034 |
| GM7664 | -0.3635783 |
| GM7714 | -2.137438  |
| GM7715 | -2.1033278 |
| GM773  | -1.7468989 |
| GM7759 | -2.2429526 |
| GM7789 | -3.7289555 |
| GM7849 | -1.5164914 |
| GM7854 | -1.9417183 |
| GM7897 | -2.4737482 |
| GM7903 | -2.2657633 |
| GM7936 | -1.4070134 |
| GM7972 | -1.4862754 |
| GM7978 | -2.1798348 |
| GM806  | -1.5529857 |

|        |            |
|--------|------------|
| GM813  | -2.2119787 |
| GM8140 | -2.0966847 |
| GM8149 | -1.5027463 |
| GM815  | -2.2930284 |
| GM8154 | -2.0685587 |
| GM8179 | -2.0322526 |
| GM8210 | -0.5521131 |
| GM8221 | -3.7636166 |
| GM826  | -3.8072612 |
| GM829  | -2.210218  |
| GM8298 | -2.238201  |
| GM8300 | -2.1694503 |
| GM8359 | -2.1559207 |
| GM839  | -1.891494  |
| GM8437 | -0.3817782 |
| GM8479 | -1.0887725 |
| GM8493 | -0.9530499 |
| GM8526 | -0.3648377 |
| GM8541 | -2.3498197 |
| GM8579 | -2.4750543 |
| GM8587 | -0.8908341 |
| GM8633 | -1.9737651 |
| GM8672 | -1.0568521 |
| GM8700 | -1.8311691 |
| GM8709 | -2.5935264 |
| GM8738 | -3.9235215 |
| GM8773 | -2.0054896 |
| GM8787 | -2.196655  |
| GM8801 | -0.3144817 |
| GM8817 | -1.4265993 |
| GM8883 | -5.852044  |
| GM8909 | -0.8343301 |
| GM8994 | -0.9687433 |
| GM9    | -0.9353132 |
| GM9054 | -1.5616553 |
| GM9059 | -1.9335775 |
| GM9079 | -0.4908128 |
| GM9112 | -1.1837199 |
| GM9125 | -2.0910583 |
| GM9199 | -3.022732  |
| GM9234 | -1.2603598 |
| GM9325 | -2.195977  |
| GM9385 | -0.9512625 |
| GM94   | -2.214151  |
| GM9457 | -0.3917155 |

|        |            |
|--------|------------|
| GM9502 | -1.637918  |
| GM9548 | -2.0785806 |
| GM9558 | -1.283787  |
| GM9564 | -1.9407003 |
| GM9567 | -2.0400333 |
| GM9725 | -0.4358571 |
| GM973  | -1.7934921 |
| GM9731 | -0.6521111 |
| GM9734 | -0.6069057 |
| GM9736 | -2.1039007 |
| GM9752 | -2.3554528 |
| GM9757 | -0.3637118 |
| GM9767 | -1.8177123 |
| GM9789 | -2.1921039 |
| GM9801 | -1.9340794 |
| GM9804 | -1.2868452 |
| GM9831 | -1.4588408 |
| GM9833 | -3.383097  |
| GM9835 | -2.1898386 |
| GM9860 | -1.7646201 |
| GM9861 | -2.0987864 |
| GM9871 | -2.0429854 |
| GM9872 | -1.6865101 |
| GM9873 | -1.8371184 |
| GM9878 | -0.7779338 |
| GM9886 | -2.0884075 |
| GM9891 | -2.0761821 |
| GM9895 | -1.2058945 |
| GM9903 | -2.0426626 |
| GM9909 | -3.9055824 |
| GM9916 | -2.818585  |
| GM9919 | -2.117528  |
| GM9921 | -2.2469347 |
| GM9926 | -1.9293656 |
| GM9928 | -0.7357335 |
| GM9934 | -2.3265615 |
| GM9946 | -1.1518657 |
| GM9951 | -2.0681896 |
| GM9958 | -1.2098598 |
| GM9961 | -2.1042347 |
| GM9963 | -0.6624293 |
| GM9968 | -2.074047  |
| GM9973 | -1.7094612 |
| GM9979 | -0.7524447 |
| GM9984 | -2.1518214 |

|         |            |
|---------|------------|
| GM9992  | -0.6535869 |
| GM9997  | -0.7227171 |
| GM9999  | -2.9013145 |
| GMCL1   | -0.5608749 |
| GMEB2   | -0.5133853 |
| GML     | -1.2887905 |
| GMNN    | -1.6976445 |
| GMPPA   | -1.3762422 |
| GMPPB   | -0.9972177 |
| GMPR2   | -0.7229061 |
| GMPS    | -0.5922062 |
| GNA11   | -1.8534765 |
| GNA12   | -1.306171  |
| GNAS    | -0.4142647 |
| GNAT1   | -4.1709948 |
| GNAT2   | -4.4603996 |
| GNB1L   | -0.878202  |
| GNB2L1  | -0.632318  |
| GNE     | -3.7725286 |
| GNG5    | -0.4846282 |
| GNG7    | -1.115912  |
| GNGT1   | -4.596413  |
| GNMT    | -9.133684  |
| GNPAT   | -0.3703575 |
| GNPDA1  | -2.0053625 |
| GNPNAT1 | -3.1841779 |
| GNPTG   | -1.0023112 |
| GNRHR   | -2.538792  |
| GNS     | -1.4306026 |
| GOLGA1  | -0.1940298 |
| GOLGA5  | -0.5579987 |
| GOLGA7  | -0.5664468 |
| GOLGA7B | -1.959758  |
| GOLIM4  | -1.2858248 |
| GOLT1A  | -3.771304  |
| GOPC    | -0.7087011 |
| GORASP1 | -2.1094866 |
| GORASP2 | -1.5044122 |
| GOSR1   | -0.6027403 |
| GOSR2   | -0.801013  |
| GOT1    | -4.0590453 |
| GOT2    | -4.089185  |
| GPAA1   | -1.3385658 |
| GPAM    | -2.2047296 |
| GPAT2   | -2.9192803 |

|         |            |
|---------|------------|
| GPATCH2 | -0.9578252 |
| GPATCH3 | -0.6489301 |
| GPBAR1  | -0.8354187 |
| GPBP1L1 | -0.7424259 |
| GPC2    | -2.0739064 |
| GPC4    | -2.9468603 |
| GPC5    | -1.498641  |
| GPC6    | -1.1548316 |
| GPD1    | -4.9010715 |
| GPD1L   | -1.9520531 |
| GPD2    | -2.0540895 |
| GPHN    | -2.0246897 |
| GPI1    | -1.3456321 |
| GPIHBP1 | -0.5590687 |
| GPLD1   | -3.6871197 |
| GPN1    | -1.0333838 |
| GPN2    | -0.9586735 |
| GPN3    | -0.8445549 |
| GPR101  | -1.457026  |
| GPR107  | -0.3067069 |
| GPR108  | -0.4393363 |
| GPR110  | -5.0135546 |
| GPR111  | -2.2141216 |
| GPR112  | -2.040004  |
| GPR115  | -1.7574165 |
| GPR119  | -2.1210122 |
| GPR12   | -2.2739632 |
| GPR124  | -0.163178  |
| GPR125  | -1.052012  |
| GPR128  | -1.9856586 |
| GPR135  | -1.7580681 |
| GPR137  | -0.823875  |
| GPR143  | -1.7860386 |
| GPR149  | -2.1612988 |
| GPR150  | -1.6077204 |
| GPR151  | -2.004087  |
| GPR155  | -1.4101913 |
| GPR156  | -0.266943  |
| GPR157  | -1.8503599 |
| GPR158  | -1.7152445 |
| GPR162  | -0.5661454 |
| GPR165  | -2.0925326 |
| GPR17   | -2.27856   |
| GPR173  | -2.510156  |
| GPR180  | -1.6032746 |

|         |            |
|---------|------------|
| GPR182  | -2.6074777 |
| GPR19   | -1.8030708 |
| GPR37   | -2.1096537 |
| GPR37L1 | -0.4599521 |
| GPR39   | -2.8151484 |
| GPR50   | -2.1950169 |
| GPR52   | -0.225209  |
| GPR55   | -1.9362111 |
| GPR61   | -0.8153391 |
| GPR75   | -2.1404006 |
| GPR89   | -2.718242  |
| GPR98   | -1.5529819 |
| GPRC5C  | -4.3879337 |
| GPRC5D  | -1.3060403 |
| GPRIN1  | -1.9752009 |
| GPRIN3  | -0.5592158 |
| GPS1    | -1.1846561 |
| GPSM2   | -2.0461974 |
| GPT     | -5.1735487 |
| GPT2    | -5.9736433 |
| GPX1    | -3.345767  |
| GPX4    | -1.8473868 |
| GPX5    | -1.9954431 |
| GPX6    | -1.7591248 |
| GRAMD1C | -3.172576  |
| GRAMD3  | -1.549386  |
| GRB14   | -2.9262547 |
| GRB2    | -0.3959107 |
| GRB7    | -3.5185766 |
| GRCC10  | -1.4061155 |
| GREB1L  | -3.1200807 |
| GREM1   | -0.595408  |
| GRHPR   | -5.657858  |
| GRIA2   | -1.9781098 |
| GRIA4   | -1.9384918 |
| GRID1   | -2.5620215 |
| GRID2   | -2.0476441 |
| GRIK1   | -1.9690876 |
| GRIK2   | -1.5576746 |
| GRIK3   | -2.1488123 |
| GRIK5   | -1.1556084 |
| GRIN2B  | -1.2478633 |
| GRIN3A  | -1.5848229 |
| GRIN3B  | -3.23096   |
| GRINA   | -1.2111411 |

|           |            |
|-----------|------------|
| GRIP1OS1  | -1.8631854 |
| GRIP1OS2  | -2.1298575 |
| GRIP2     | -0.7844462 |
| GRK6      | -0.2486315 |
| GRM1      | -1.3205259 |
| GRM2      | -1.6114564 |
| GRM3      | -2.21365   |
| GRM7      | -2.110415  |
| GRM8      | -2.4585142 |
| GRN       | -2.3870106 |
| GRPEL1    | -3.136713  |
| GRPEL2    | -1.0131164 |
| GRPR      | -2.8144498 |
| GRSF1     | -1.7201109 |
| GRTTP1    | -3.4040298 |
| GRWD1     | -0.7773542 |
| GRXCR1    | -1.9384012 |
| GRXCR2    | -2.2010722 |
| GSC       | -2.0819905 |
| GSC2      | -1.7458439 |
| GSDMCL2   | -1.2437484 |
| GSDMCL-PS | -2.1710753 |
| GSDMD     | -1.2516999 |
| GSG1L     | -1.2910724 |
| GSKIP     | -0.7865367 |
| GSPT1     | -0.672936  |
| GSPT2     | -0.2148738 |
| GSR       | -1.2310748 |
| GSS       | -3.2473683 |
| GSTA2     | -3.1897278 |
| GSTA3     | -3.4267316 |
| GSTA4     | -1.2186217 |
| GSTK1     | -3.3518496 |
| GSTM1     | -3.4999256 |
| GSTM2     | -2.1626415 |
| GSTM3     | -4.685863  |
| GSTM4     | -3.783958  |
| GSTM5     | -3.6836014 |
| GSTM6     | -5.7901697 |
| GSTM7     | -6.4325113 |
| GSTO1     | -1.6197433 |
| GSTP1     | -5.101807  |
| GSTP2     | -3.6506276 |
| GSTT1     | -3.6981602 |
| GSTT2     | -4.5341806 |



|          |            |
|----------|------------|
| GSTT3    | -3.8631988 |
| GSTZ1    | -5.296144  |
| GSX2     | -2.2620175 |
| GTF2A1L  | -0.8592229 |
| GTF2A2   | -1.2084761 |
| GTF2E1   | -1.1881576 |
| GTF2E2   | -0.3836417 |
| GTF2H2   | -0.7639179 |
| GTF2H3   | -1.1204243 |
| GTF2H4   | -1.9530149 |
| GTF2H5   | -0.6917219 |
| GTF2I    | -0.9590583 |
| GTF2IRD1 | -1.141799  |
| GTF2IRD2 | -0.5637183 |
| GTF3A    | -1.7230325 |
| GTF3C1   | -0.9304028 |
| GTF3C2   | -0.7080064 |
| GTF3C3   | -0.6942134 |
| GTF3C4   | -0.5938511 |
| GTF3C6   | -0.7003608 |
| GTL3     | -0.6197152 |
| GTPBP1   | -0.4368825 |
| GTPBP10  | -1.5675507 |
| GTPBP3   | -0.4640136 |
| GTPBP6   | -0.223907  |
| GTPBP8   | -1.1702862 |
| GTSF1L   | -2.0117254 |
| GUCA1A   | -2.7411907 |
| GUCA1B   | -0.6379829 |
| GUCA2A   | -1.0895984 |
| GUCA2B   | -3.2482758 |
| GUCD1    | -3.0687199 |
| GUCY1B2  | -3.6472297 |
| GUCY2C   | -4.0870457 |
| GUCY2G   | -1.9857807 |
| GUF1     | -0.8989644 |
| GUK1     | -1.3758292 |
| GULO     | -14.333725 |
| GUSB     | -0.5861011 |
| GXYLT2   | -2.0766363 |
| GYK      | -1.3395271 |
| GYKL1    | -1.538693  |
| GYLTL1B  | -1.0076852 |
| GYPE     | -0.8447809 |
| GYS2     | -11.134899 |

|          |            |
|----------|------------|
| GZF1     | -1.1872911 |
| GZMD     | -1.9643366 |
| GZME     | -3.2416673 |
| GZMF     | -2.4358807 |
| GZMG     | -2.2571104 |
| GZMN     | -2.0320907 |
| H13      | -1.293004  |
| H19      | -6.917817  |
| H1F0     | -2.81962   |
| H1FNT    | -1.5759251 |
| H1FOO    | -0.6991286 |
| H1FX     | -1.5763702 |
| H2-AA    | -0.2454557 |
| H2-AB1   | -1.005095  |
| H2AFB1   | -2.132865  |
| H2AFB2   | -2.3167505 |
| H2AFV    | -1.5217247 |
| H2AFX    | -0.7646837 |
| H2AFY    | -0.4906645 |
| H2-DMA   | -1.3006358 |
| H2-DMB1  | -0.4362612 |
| H2-EA-PS | -1.0828285 |
| H2-EB1   | -1.3388247 |
| H2-K1    | -1.1566625 |
| H2-K2    | -0.5773635 |
| H2-KE2   | -0.7112999 |
| H2-KE6   | -2.566145  |
| H2-M1    | -2.1945148 |
| H2-M10.1 | -1.835038  |
| H2-M10.2 | -2.0692663 |
| H2-M10.3 | -2.182688  |
| H2-M10.6 | -1.606369  |
| H2-M11   | -1.0682452 |
| H2-M2    | -1.3070097 |
| H2-M9    | -1.9039092 |
| H2-OA    | -0.689353  |
| H2-Q1    | -4.4323506 |
| H2-Q10   | -3.8072104 |
| H2-Q2    | -1.3005748 |
| H2-Q4    | -0.2424116 |
| H2-Q7    | -1.1424327 |
| H2-Q8    | -0.8971205 |
| H2-T10   | -2.3727608 |
| H2-T23   | -1.5550623 |
| H2-T3    | -1.4076395 |

|         |            |
|---------|------------|
| H2-T9   | -2.628498  |
| H6PD    | -1.8828945 |
| HAAO    | -7.767494  |
| HABP2   | -11.769136 |
| HABP4   | -2.35292   |
| HACL1   | -7.8250833 |
| HADH    | -4.3632107 |
| HADHA   | -2.1455264 |
| HADHB   | -3.0272074 |
| HAGH    | -4.3305283 |
| HAGHL   | -0.761724  |
| HAL     | -6.5794106 |
| HAMP    | -7.701992  |
| HAMP2   | -13.739183 |
| HAND1   | -2.2432504 |
| HAND2   | -5.379454  |
| HAO1    | -12.035139 |
| HAO2    | -9.7947855 |
| HAPLN1  | -0.5476141 |
| HAPLN2  | -1.9148636 |
| HAPLN4  | -6.024231  |
| HARBI1  | -1.8758016 |
| HARS    | -0.8402157 |
| HARS2   | -1.2141142 |
| HAS2OS  | -0.503875  |
| HAUS1   | -0.959178  |
| HAUS2   | -1.1585579 |
| HAUS4   | -2.1599617 |
| HAUS5   | -1.4773927 |
| HAUS7   | -1.5677135 |
| HAVCR1  | -7.4535065 |
| HAX1    | -1.441761  |
| HBA-A1  | -0.4393086 |
| HBA-A2  | -1.117701  |
| HBA-X   | -1.9527168 |
| HBB-BH2 | -2.5981262 |
| HBP1    | -0.4956012 |
| HBS1L   | -1.2051454 |
| HC      | -2.0202003 |
| HCCS    | -0.1443176 |
| HCFC1   | -0.8342614 |
| HCFC1R1 | -1.4457054 |
| HCN1    | -2.2756844 |
| HCN2    | -1.6058874 |
| HCN3    | -2.0066576 |

|         |            |
|---------|------------|
| HCRT2   | -2.0772932 |
| HDAC10  | -1.4570627 |
| HDAC11  | -4.7175655 |
| HDAC3   | -1.7262602 |
| HDAC6   | -1.5827117 |
| HDAC9   | -0.3654091 |
| HDDC3   | -2.4457793 |
| HDGF    | -0.9702368 |
| HDGFL1  | -2.244957  |
| HDGFRP2 | -0.7110963 |
| HDHD1A  | -0.6807232 |
| HDHD2   | -0.5476685 |
| HDHD3   | -5.603849  |
| HDLBP   | -1.8881583 |
| HEATR9  | -1.6354978 |
| HEBP1   | -3.7321444 |
| HEBP2   | -1.5935009 |
| HECTD1  | -0.6106653 |
| HECTD3  | -1.5360942 |
| HECW1   | -2.014535  |
| HELB    | -0.8191495 |
| HELQ    | -0.9638677 |
| HELT    | -2.0968192 |
| HEMGN   | -1.7440863 |
| HEMK1   | -2.8266566 |
| HENMT1  | -1.6432252 |
| HERC3   | -0.4359851 |
| HERPUD1 | -0.4368992 |
| HES3    | -2.114249  |
| HES6    | -2.7950191 |
| HEXA    | -1.2609739 |
| HEXB    | -0.9583073 |
| HEXDC   | -2.0564728 |
| HEXIM1  | -0.4317322 |
| HFE     | -2.5732527 |
| HFE2    | -6.8359537 |
| HFM1    | -2.0875072 |
| HGD     | -12.682838 |
| HGF     | -0.4191103 |
| HGFAC   | -8.96076   |
| HGS     | -0.6808162 |
| HGSNAT  | -1.9953566 |
| HHEX    | -3.4530945 |
| HHIPL1  | -0.9346342 |
| HHIPL2  | -3.4259162 |

|             |            |
|-------------|------------|
| HHLA1       | -0.840518  |
| HIATL1      | -0.1751847 |
| HIBADH      | -2.8540196 |
| HIBCH       | -3.76787   |
| HIC1        | -0.9739208 |
| HIGD1A      | -1.5821333 |
| HIGD1C      | -5.2282543 |
| HIGD2A      | -1.9173517 |
| HINT1       | -1.5221219 |
| HINT2       | -3.6521735 |
| HINT3       | -2.1166983 |
| HIST1H1C    | -2.2481375 |
| HIST1H2BA   | -2.0090723 |
| HIST1H2BC   | -1.9392915 |
| HIST1H2BM   | -1.9897871 |
| HIST1H3A    | -0.7594879 |
| HIST1H4I    | -0.351366  |
| HIST1H4M    | -0.2360039 |
| HIST2H2AA2  | -0.2445498 |
| HIST2H3C2   | -1.2080421 |
| HIST3H2BB-P | -3.0455964 |
| HJURP       | -1.5048985 |
| HK1         | -0.484592  |
| HK3         | -1.8280001 |
| HLCS        | -1.7720485 |
| HLF         | -4.1018105 |
| HMBOX1      | -1.6069055 |
| HMBS        | -2.8189125 |
| HMG20B      | -0.8032117 |
| HMGB3       | -1.3805246 |
| HMGCL       | -4.1555867 |
| HMGCR       | -2.5076869 |
| HMGCS1      | -2.7039213 |
| HMGCS2      | -6.7734976 |
| HMGN1       | -0.3982983 |
| HMGN5       | -0.7773719 |
| HMOX1       | -0.2314019 |
| HMOX2       | -1.8755298 |
| HMX1        | -1.9449184 |
| HMX2        | -2.8137484 |
| HN1L        | -0.9008274 |
| HNF1A       | -8.135511  |
| HNF1B       | -1.5114789 |
| HNF4A       | -11.901481 |
| HNF4AOS     | -6.0907974 |

|           |            |
|-----------|------------|
| HNF4G     | -2.188185  |
| HNMT      | -1.7498417 |
| HNRNPA0   | -0.2831154 |
| HNRNPA2B1 | -0.3733115 |
| HNRNPAB   | -0.3094211 |
| HNRNPDL   | -0.2465529 |
| HNRNPF    | -0.2618055 |
| HOGA1     | -5.794197  |
| HOMER1    | -0.2207809 |
| HOMER2    | -2.7238395 |
| HOMEZ     | -0.5947418 |
| HOOK1     | -2.215229  |
| HOOK2     | -1.3458581 |
| HOTTIP    | -2.180602  |
| HOXA10    | -2.1004    |
| HOXA11    | -1.8918076 |
| HOXA13    | -0.5431628 |
| HOXA2     | -0.6448948 |
| HOXB1     | -2.1498199 |
| HOXB13    | -2.159321  |
| HOXC12    | -2.571198  |
| HOXC13    | -2.1214545 |
| HOXC4     | -0.638422  |
| HOXC5     | -1.9814367 |
| HOXC6     | -2.0531797 |
| HOXC8     | -2.4697444 |
| HOXD1     | -1.5639939 |
| HOXD11    | -1.4261987 |
| HOXD12    | -2.191573  |
| HOXD13    | -1.9816089 |
| HOXD3     | -2.549293  |
| HOXD3OS1  | -2.023022  |
| HOXD9     | -1.6797066 |
| HP        | -1.6084924 |
| HP1BP3    | -0.5145216 |
| HPCA      | -2.272886  |
| HPCAL4    | -2.2270136 |
| HPD       | -15.347865 |
| HPDL      | -1.5391881 |
| HPGD      | -1.8409305 |
| HPN       | -5.936186  |
| HPRT      | -0.6041126 |
| HPS1      | -0.8529422 |
| HPS4      | -0.6250892 |
| HPSE      | -0.8803659 |

|          |            |
|----------|------------|
| HPX      | -9.765099  |
| HR       | -0.8225179 |
| HRAS     | -1.8282275 |
| HRASLS   | -1.1999176 |
| HRG      | -12.397257 |
| HRH4     | -1.1366773 |
| HRK      | -3.4855683 |
| HRNR     | -0.5168691 |
| HRSP12   | -6.538277  |
| HS1BP3   | -1.3691478 |
| HS2ST1   | -1.5605359 |
| HS3ST3A1 | -1.082346  |
| HS3ST3B1 | -2.2488508 |
| HS3ST4   | -2.2660112 |
| HS3ST5   | -2.0117652 |
| HS6ST1   | -2.9139974 |
| HSBP1    | -0.6032605 |
| HSBP1L1  | -4.4456844 |
| HSD11B1  | -2.884162  |
| HSD11B2  | -1.1248562 |
| HSD17B1  | -1.3325622 |
| HSD17B10 | -3.3639393 |
| HSD17B11 | -1.7473497 |
| HSD17B12 | -2.4666429 |
| HSD17B13 | -10.663885 |
| HSD17B2  | -8.913033  |
| HSD17B3  | -2.4589138 |
| HSD17B4  | -2.665287  |
| HSD17B6  | -11.710663 |
| HSD17B7  | -3.6598053 |
| HSD3B1   | -6.4645786 |
| HSD3B2   | -0.7532439 |
| HSD3B3   | -13.023983 |
| HSD3B4   | -1.4472587 |
| HSD3B5   | -2.8136833 |
| HSD3B6   | -5.281543  |
| HSD3B7   | -4.3792686 |
| HSDL2    | -2.5550804 |
| HSF1     | -0.1963444 |
| HSF2     | -1.7718129 |
| HSF2BP   | -0.6429424 |
| HSF3     | -1.849426  |
| HSF4     | -1.8967252 |
| HSF5     | -1.5867383 |
| HSFY2    | -2.452839  |

|         |            |
|---------|------------|
| HSP90B1 | -0.4590926 |
| HSPA13  | -0.5196257 |
| HSPA14  | -0.2560825 |
| HSPA4   | -0.7721834 |
| HSPA5   | -0.3728814 |
| HSPA8   | -0.5795045 |
| HSPA9   | -2.2547069 |
| HSPB11  | -0.5279627 |
| HSPB6   | -1.1700115 |
| HSPB8   | -3.2621188 |
| HSPB9   | -0.4191077 |
| HSPBAP1 | -0.5971758 |
| HSPBP1  | -2.1382585 |
| HSPD1   | -1.943408  |
| HSPE1   | -1.4568686 |
| HTATIP2 | -4.343337  |
| HTR1A   | -2.0457742 |
| HTR1D   | -1.5506108 |
| HTR1F   | -1.763809  |
| HTR3A   | -1.9151192 |
| HTR3B   | -2.1813617 |
| HTR4    | -0.5094891 |
| HTR5A   | -2.0153043 |
| HTR5B   | -1.8353865 |
| HTR6    | -1.5487711 |
| HTRA2   | -0.6013641 |
| HTRA4   | -0.7014639 |
| HYAL1   | -1.7347498 |
| HYAL2   | -0.7563696 |
| HYAL3   | -1.931776  |
| HYAL4   | -2.2799232 |
| HYAL5   | -3.5958905 |
| HYAL6   | -0.9677627 |
| HYI     | -4.6280794 |
| HYKK    | -4.2555885 |
| HYPK    | -0.8399906 |
| IAH1    | -2.175447  |
| IAPP    | -2.0333557 |
| IARS    | -0.5409694 |
| IARS2   | -1.6677594 |
| IBA57   | -1.6793275 |
| IBSP    | -1.9225688 |
| IBTK    | -0.8900609 |
| ICA1L   | -1.1438487 |
| ICK     | -0.4154625 |



|          |            |
|----------|------------|
| ICT1     | -1.654438  |
| ID2      | -0.6064096 |
| IDE      | -1.244792  |
| IDH1     | -2.489819  |
| IDH2     | -1.6234846 |
| IDH3A    | -0.9221048 |
| IDH3B    | -2.3322868 |
| IDH3G    | -0.7781162 |
| IDI1     | -2.9721742 |
| IDI2     | -1.1255441 |
| IDNK     | -1.8048506 |
| IDO2     | -6.569771  |
| IFFO1    | -0.8232966 |
| IFI27    | -1.1157222 |
| IFI27L2B | -2.2599778 |
| IFI30    | -0.489583  |
| IFITM2   | -1.1355772 |
| IFITM3   | -1.771555  |
| IFITM7   | -1.7403727 |
| IFLTD1   | -1.2484088 |
| IFNA11   | -1.1173573 |
| IFNA2    | -0.5479331 |
| IFNA4    | -2.252474  |
| IFNAR2   | -0.9445009 |
| IFNB1    | -1.8519168 |
| IFNE     | -2.1981583 |
| IFRD2    | -2.011839  |
| IFT20    | -1.1979213 |
| IFT22    | -0.4523516 |
| IFT27    | -1.1857495 |
| IFT46    | -1.3931165 |
| IFT52    | -0.9724717 |
| IFT88OS  | -2.1535635 |
| IGBP1    | -0.8525248 |
| IGBP1B   | -3.624101  |
| IGDCC3   | -0.7227795 |
| IGDCC4   | -4.9218082 |
| IGF1     | -5.70242   |
| IGF1OS   | -2.5981104 |
| IGF2     | -0.6620534 |
| IGF2BP3  | -4.75476   |
| IGF2OS   | -1.2537875 |
| IGF2R    | -0.6640916 |
| IGFALS   | -10.087584 |
| IGFBP1   | -11.841067 |

|          |            |
|----------|------------|
| IGFBP2   | -4.45442   |
| IGFBP4   | -5.151928  |
| IGFL3    | -1.5202837 |
| IGHMBP2  | -0.6962562 |
| IGJ      | -0.4898739 |
| IGKV4-53 | -1.3502755 |
| IGKV4-55 | -2.1047199 |
| IGKV4-72 | -2.0823102 |
| IGKV6-15 | -1.9930003 |
| IGLL1    | -2.0769856 |
| IGLON5   | -1.5984204 |
| IGLV1    | -0.5139284 |
| IGSF11   | -5.6356053 |
| IGSF5    | -2.2965364 |
| IGSF8    | -0.9597244 |
| IGSF9    | -1.6461921 |
| IGSF9B   | -0.7914441 |
| IGTP     | -1.0256486 |
| IHH      | -1.8455303 |
| IIGP1    | -0.8709989 |
| IIGP1B   | -2.2154875 |
| IKBKB    | -0.4151774 |
| IKBKG    | -0.9377165 |
| IKZF3    | -2.474184  |
| IL11RA1  | -0.7301111 |
| IL12A    | -2.1366346 |
| IL13     | -2.0099697 |
| IL13RA2  | -0.2530925 |
| IL15RA   | -1.5374227 |
| IL17RB   | -4.430485  |
| IL17RC   | -2.0074139 |
| IL18BP   | -1.8963017 |
| IL19     | -2.345912  |
| IL1F5    | -1.8293142 |
| IL1F8    | -2.0301244 |
| IL1R1    | -0.5298338 |
| IL1RAP   | -4.6200943 |
| IL1RAPL1 | -2.171574  |
| IL1RAPL2 | -2.004772  |
| IL22     | -1.5369532 |
| IL22RA1  | -2.877095  |
| IL25     | -1.0262995 |
| IL27     | -2.1806602 |
| IL3      | -1.735295  |
| IL31     | -2.01528   |

|        |            |
|--------|------------|
| IL5    | -1.704423  |
| IL6RA  | -0.8823052 |
| IL9    | -2.3748837 |
| IL9R   | -1.0246172 |
| ILDR2  | -1.4311237 |
| ILKAP  | -0.5082717 |
| ILTIFB | -2.9121513 |
| ILVBL  | -2.6302624 |
| IMMP1L | -0.8397565 |
| IMMP2L | -5.093136  |
| IMMT   | -1.8480458 |
| IMP3   | -0.6130819 |
| IMPA1  | -1.4242401 |
| IMPA2  | -1.0444779 |
| IMPAD1 | -0.4252567 |
| IMPDH2 | -0.2455163 |
| IMPG1  | -1.5296955 |
| IMPG2  | -1.8426783 |
| INCA1  | -5.5722017 |
| INF2   | -1.056407  |
| ING2   | -0.246789  |
| ING4   | -0.7769494 |
| INHBA  | -1.767961  |
| INHBC  | -11.24538  |
| INHBE  | -7.8670225 |
| INMT   | -1.6159115 |
| INO80C | -0.2497501 |
| INPP1  | -0.9793658 |
| INPP5E | -0.1892681 |
| INPP5F | -0.5825982 |
| INPPL1 | -1.1508074 |
| INSC   | -7.7560825 |
| INSIG1 | -3.231523  |
| INSIG2 | -4.028211  |
| INSR   | -1.5498343 |
| INSRR  | -0.7985468 |
| INTS1  | -1.1681304 |
| INTS10 | -0.284616  |
| INTS3  | -0.6403863 |
| INTS4  | -0.7203221 |
| INTS5  | -0.65555   |
| INTS7  | -0.3734644 |
| INTU   | -0.6552298 |
| INVS   | -0.7150426 |
| IP6K1  | -0.7359839 |

|          |            |
|----------|------------|
| IPMK     | -1.1347127 |
| IPO11    | -0.5440517 |
| IPO4     | -1.2722011 |
| IPO5     | -0.5015669 |
| IPO8     | -0.9449005 |
| IPP      | -1.0813417 |
| IPPK     | -0.2630582 |
| IPW      | -2.073242  |
| IQCC     | -1.1610451 |
| IQCE     | -0.7153668 |
| IQCF4    | -1.5047688 |
| IQCF5    | -2.096733  |
| IQCF6    | -2.0846107 |
| IQCG     | -0.5625134 |
| IQCJ     | -1.066289  |
| IQGAP2   | -3.7287912 |
| IQGAP3   | -1.3592331 |
| IQSEC1   | -0.2919407 |
| IQSEC3   | -4.142639  |
| IRAK1    | -0.2608414 |
| IRAK1BP1 | -1.134378  |
| IRAK2    | -1.2268372 |
| IREB2    | -0.5500975 |
| IRF2BP1  | -1.4377971 |
| IRF3     | -0.947711  |
| IRF6     | -1.9004779 |
| IRF7     | -0.5238481 |
| IRGM1    | -0.652463  |
| IRGM2    | -0.6371059 |
| IRGQ     | -0.5149989 |
| IRS1     | -2.592447  |
| IRX3OS   | -1.0395474 |
| IRX6     | -1.9906225 |
| ISCA1    | -1.251977  |
| ISCA2    | -1.6839395 |
| ISCU     | -0.7944994 |
| ISG20L2  | -0.4142075 |
| ISL1     | -2.0863335 |
| ISL2     | -2.1850524 |
| ISM2     | -1.6526854 |
| ISOC1    | -1.9269872 |
| ISOC2A   | -2.6725986 |
| ISOC2B   | -1.6655846 |
| ISPD     | -1.102845  |
| ISX      | -2.075794  |

|          |            |
|----------|------------|
| ISY1     | -0.7952056 |
| ISYNA1   | -0.3191514 |
| ITCH     | -0.7956009 |
| ITFG1    | -1.327065  |
| ITFG2    | -1.2345061 |
| ITFG3    | -1.8237963 |
| ITGA5    | -1.0256848 |
| ITGA9    | -0.616725  |
| ITGB1BP1 | -0.2188277 |
| ITGB3BP  | -1.0052676 |
| ITGB5    | -1.573031  |
| ITIH1    | -9.430674  |
| ITIH2    | -8.804731  |
| ITIH3    | -8.709879  |
| ITIH4    | -4.3681035 |
| ITM2B    | -1.4126005 |
| ITM2C    | -0.4162421 |
| ITPA     | -1.4007921 |
| ITPK1    | -0.9680557 |
| ITPKA    | -1.1934195 |
| ITPR2    | -1.0021167 |
| ITPR3OS  | -1.4845014 |
| ITSN1    | -1.8137765 |
| IVD      | -3.4406009 |
| IVNS1ABP | -0.3506503 |
| IYD      | -5.9172697 |
| IZUMO1   | -1.4358373 |
| IZUMO2   | -2.8673995 |
| IZUMO4   | -1.684526  |
| JADE1    | -0.6083241 |
| JAGN1    | -2.0059185 |
| JAKMIP2  | -3.2230046 |
| JAKMIP3  | -1.792131  |
| JAM2     | -0.1911783 |
| JKAMP    | -1.0831904 |
| JMJD4    | -1.513608  |
| JMJD7    | -2.1259544 |
| JMJD8    | -2.3291578 |
| JOSD1    | -1.9660759 |
| JOSD2    | -1.9146595 |
| JPH1     | -1.7020259 |
| JPH3     | -1.2868402 |
| JPH4     | -2.0030394 |
| JPX      | -0.92629   |
| JRK      | -1.1655037 |

|           |            |
|-----------|------------|
| JTB       | -1.2959161 |
| JUNOS     | -1.5270424 |
| KANK1     | -1.4016948 |
| KANSL2    | -0.6956015 |
| KARS      | -0.9205718 |
| KAT2A     | -1.5258155 |
| KAT2B     | -1.9359403 |
| KAT8      | -0.9744792 |
| KBTBD12   | -2.006864  |
| KBTBD13   | -1.493443  |
| KBTBD4    | -0.5867925 |
| KCMF1     | -0.3396277 |
| KCNA2     | -2.0620387 |
| KCNA4     | -1.6710191 |
| KCNA5     | -0.8473988 |
| KCNA6     | -0.3612413 |
| KCNA7     | -0.2777674 |
| KCNAB2    | -0.5230761 |
| KCNAB3    | -1.2738755 |
| KCNB1     | -1.369674  |
| KCND3OS   | -3.2791848 |
| KCNE1     | -1.5875685 |
| KCNE1L    | -4.188019  |
| KCNF1     | -2.7343342 |
| KCNG2     | -2.2499247 |
| KCNG3     | -0.6440764 |
| KCNG4     | -2.3184052 |
| KCNH2     | -0.5596635 |
| KCNH4     | -0.3177674 |
| KCNH5     | -2.1801608 |
| KCNH6     | -2.389091  |
| KCNH8     | -1.2105889 |
| KCNIP1    | -1.4444551 |
| KCNJ1     | -2.142074  |
| KCNJ10    | -3.8985057 |
| KCNJ12    | -0.6752603 |
| KCNJ16    | -3.6964624 |
| KCNJ4     | -1.8720968 |
| KCNJ9     | -2.320086  |
| KCNK15    | -1.4881256 |
| KCNK5     | -2.6344664 |
| KCNMB4OS1 | -2.20277   |
| KCNN2     | -6.7439194 |
| KCNQ2     | -1.4310372 |
| KCNQ5     | -0.2310224 |

|         |            |
|---------|------------|
| KCNS2   | -2.1197944 |
| KCNT2   | -2.0872355 |
| KCNV1   | -2.2435215 |
| KCNV2   | -2.2457755 |
| KCP     | -3.2472987 |
| KCTD14  | -0.800796  |
| KCTD15  | -0.2964382 |
| KCTD16  | -2.3610623 |
| KCTD17  | -0.4989786 |
| KCTD18  | -0.6192637 |
| KCTD2   | -0.8254228 |
| KCTD20  | -0.3385954 |
| KCTD3   | -0.177947  |
| KCTD6   | -0.3536892 |
| KCTD7   | -1.7753184 |
| KDELC1  | -0.5950232 |
| KDELR1  | -1.3662539 |
| KDELR2  | -1.81604   |
| KDF1    | -0.3323956 |
| KDM1B   | -1.7058802 |
| KDM4A   | -0.2389803 |
| KDM4B   | -0.2798686 |
| KDM5D   | -2.1413414 |
| KDM8    | -0.8545671 |
| KDR     | -0.298584  |
| KDSR    | -1.0835166 |
| KEAP1   | -0.8922057 |
| KEG1    | -7.9651966 |
| KERA    | -1.9493723 |
| KHDC1A  | -2.1798747 |
| KHDC1B  | -2.0524824 |
| KHDRBS2 | -2.7052402 |
| KHDRBS3 | -2.0037894 |
| KHK     | -6.3983936 |
| KHNYN   | -0.2725959 |
| KHSRP   | -1.876401  |
| KIF12   | -2.0277004 |
| KIF13B  | -1.1633463 |
| KIF17   | -0.7460196 |
| KIF18B  | -0.7126341 |
| KIF19A  | -0.3620024 |
| KIF1B   | -1.1259685 |
| KIF1C   | -0.8370147 |
| KIF20A  | -1.1370058 |
| KIF21A  | -2.1512356 |

|         |            |
|---------|------------|
| KIF22   | -0.9268198 |
| KIF24   | -0.7035344 |
| KIF2C   | -0.9008005 |
| KIF3C   | -2.1834264 |
| KIFC1   | -1.493078  |
| KIFC2   | -0.9445796 |
| KIFC3   | -1.5814648 |
| KIFC5B  | -0.7542191 |
| KIR3DL1 | -1.6770296 |
| KIR3DL2 | -2.0088122 |
| KIRREL2 | -2.3128688 |
| KIRREL3 | -0.6670218 |
| KIS2    | -1.6919079 |
| KISS1   | -3.4984217 |
| KL      | -1.8217778 |
| KLB     | -9.676165  |
| KLC4    | -2.5701418 |
| KLF1    | -4.6887503 |
| KLF12   | -2.1780398 |
| KLF14   | -2.1201808 |
| KLF15   | -1.6585183 |
| KLF17   | -1.5919359 |
| KLHDC10 | -1.5348392 |
| KLHDC2  | -1.623467  |
| KLHDC3  | -1.3900008 |
| KLHDC7A | -1.8034544 |
| KLHDC7B | -1.1665308 |
| KLHL10  | -0.5199626 |
| KLHL12  | -0.6768923 |
| KLHL13  | -1.6646357 |
| KLHL14  | -2.0918994 |
| KLHL15  | -0.2785447 |
| KLHL17  | -0.3691039 |
| KLHL22  | -0.6739979 |
| KLHL25  | -0.6419592 |
| KLHL26  | -0.4139805 |
| KLHL3   | -1.8044176 |
| KLHL36  | -1.3335109 |
| KLHL4   | -2.2178419 |
| KLHL40  | -2.7638001 |
| KLHL8   | -0.3504133 |
| KLHL9   | -0.573987  |
| CLK12   | -1.1524916 |
| CLK15   | -3.5264063 |
| CLK1B1  | -2.0536091 |



|           |            |
|-----------|------------|
| KLK1B11   | -1.283999  |
| KLK1B16   | -2.2124472 |
| KLK1B22   | -1.0353596 |
| KLK1B4    | -0.6283007 |
| KLK1B7-PS | -3.1738367 |
| KLK1B9    | -0.9283912 |
| KLK5      | -1.9502652 |
| KLKB1     | -8.231562  |
| KLRA10    | -1.7891619 |
| KLRA19    | -1.9627204 |
| KLRB1-PS1 | -1.5901487 |
| KMO       | -5.6546836 |
| KNCN      | -2.1404452 |
| KNG1      | -12.132267 |
| KNG2      | -13.23794  |
| KNOP1     | -0.8720603 |
| KNSTRN    | -0.4510422 |
| KNTC1     | -0.8935657 |
| KPNA1     | -0.3733902 |
| KPNA2     | -0.7158246 |
| KPNA6     | -0.3616047 |
| KPNA7     | -2.2904649 |
| KPNB1     | -0.8967905 |
| KPRP      | -1.4684567 |
| KPTN      | -1.7716918 |
| KRBA1     | -1.1564102 |
| KREMEN2   | -0.9692154 |
| KRT1      | -1.2174635 |
| KRT10     | -0.6288559 |
| KRT12     | -1.9133842 |
| KRT18     | -2.3049154 |
| KRT20     | -1.8806016 |
| KRT25     | -2.2132316 |
| KRT28     | -1.1609044 |
| KRT33B    | -2.270111  |
| KRT34     | -2.0499682 |
| KRT35     | -2.1323645 |
| KRT36     | -1.3447928 |
| KRT40     | -2.2079144 |
| KRT71     | -1.6920393 |
| KRT72     | -1.4980552 |
| KRT73     | -2.0770888 |
| KRT74     | -2.3519123 |
| KRT76     | -2.0950615 |
| KRT8      | -2.6507707 |

|            |            |
|------------|------------|
| KRT84      | -2.260809  |
| KRT85      | -0.5799818 |
| KRTAP11-1  | -0.7797856 |
| KRTAP13    | -2.0809264 |
| KRTAP1-3   | -2.188259  |
| KRTAP13-1  | -2.2889209 |
| KRTAP14    | -2.171632  |
| KRTAP15    | -2.9666605 |
| KRTAP1-5   | -2.1704113 |
| KRTAP19-1  | -2.329049  |
| KRTAP19-3  | -2.6819944 |
| KRTAP19-5  | -0.8833206 |
| KRTAP19-9B | -2.1378422 |
| KRTAP21-1  | -2.9882565 |
| KRTAP22-2  | -2.1280036 |
| KRTAP2-4   | -2.1421502 |
| KRTAP24-1  | -1.9748883 |
| KRTAP26-1  | -2.085944  |
| KRTAP28-10 | -2.3349216 |
| KRTAP3-1   | -1.7426038 |
| KRTAP31-2  | -2.3129897 |
| KRTAP3-2   | -1.76051   |
| KRTAP3-3   | -2.02349   |
| KRTAP4-2   | -3.5351107 |
| KRTAP4-6   | -2.0682535 |
| KRTAP4-7   | -1.553766  |
| KRTAP4-8   | -0.8606043 |
| KRTAP5-2   | -0.1979942 |
| KRTAP6-1   | -2.2470927 |
| KRTAP6-2   | -2.0327535 |
| KRTAP6-5   | -2.1049619 |
| KRTAP7-1   | -2.2049253 |
| KRTAP9-1   | -0.3340414 |
| KRTAP9-5   | -1.7045765 |
| KRTCAP2    | -0.9884138 |
| KRTDAP     | -1.6293936 |
| KSR2       | -1.1946964 |
| KT112      | -1.3278742 |
| KXD1       | -2.4715176 |
| KY         | -2.1239681 |
| KYNU       | -5.724908  |
| L2HGDH     | -3.951832  |
| L3HYPDH    | -4.0438294 |
| L3MBTL1    | -1.7544734 |
| L3MBTL2    | -1.6430459 |

|         |            |
|---------|------------|
| L3MBTL4 | -1.680121  |
| L7RN6   | -0.4133911 |
| LACC1   | -0.3213873 |
| LACE1   | -1.5861733 |
| LACTB   | -2.9486113 |
| LACTB2  | -3.5272512 |
| LAGE3   | -1.8218489 |
| LAMA1   | -1.8901186 |
| LAMP1   | -1.4957395 |
| LAMP2   | -1.3889394 |
| LAMP5   | -2.152463  |
| LAMTOR1 | -1.7248807 |
| LAMTOR2 | -1.683157  |
| LAMTOR4 | -2.094709  |
| LAMTOR5 | -0.4287977 |
| LANCL1  | -0.6885963 |
| LAP3    | -1.6493783 |
| LARP1   | -0.8188133 |
| LARP1B  | -2.5275087 |
| LARP4   | -0.7497907 |
| LARS    | -0.5954251 |
| LARS2   | -1.1063848 |
| LAS1L   | -1.0628805 |
| LASP1   | -0.4996266 |
| LBP     | -2.4277244 |
| LCAT    | -10.102018 |
| LCE1A1  | -1.9872725 |
| LCE1A2  | -0.6518292 |
| LCE1D   | -2.1956947 |
| LCE1F   | -2.1022968 |
| LCE1G   | -2.8546467 |
| LCE1H   | -2.1750908 |
| LCE1I   | -1.9031711 |
| LCE1J   | -0.4261203 |
| LCE1K   | -1.207694  |
| LCE1L   | -2.3575547 |
| LCE3A   | -2.290801  |
| LCE3D   | -1.3523972 |
| LCE3E   | -1.948838  |
| LCE3F   | -2.7288651 |
| LCLAT1  | -2.1558895 |
| LCMT1   | -1.328064  |
| LCMT2   | -1.6667109 |
| LCN12   | -0.9548788 |
| LCN4    | -2.1167612 |

|          |            |
|----------|------------|
| LCN5     | -1.6304319 |
| LDB1     | -0.9758143 |
| LDHA     | -1.7893863 |
| LDHC     | -0.5423307 |
| LDHD     | -4.9426327 |
| LDLR     | -2.4253745 |
| LDLRAD2  | -2.234874  |
| LDLRAD3  | -1.8032441 |
| LDLRAP1  | -2.2426138 |
| LEAP2    | -9.635433  |
| LECT1    | -2.8229008 |
| LECT2    | -13.810886 |
| LEFTY1   | -3.7228003 |
| LEMD1    | -2.2375689 |
| LEMD2    | -0.3514986 |
| LENEP    | -1.3808951 |
| LENG9    | -0.2589026 |
| LEP      | -2.0746999 |
| LEPR     | -0.7137222 |
| LEPRE1   | -1.1072693 |
| LEPROT   | -0.2683125 |
| LETM1    | -0.7555046 |
| LETMD1   | -1.5442977 |
| LGALS3BP | -0.8750806 |
| LGALS4   | -2.4702768 |
| LGALS6   | -1.8394673 |
| LGALS8   | -1.3167338 |
| LGALS9   | -3.4818277 |
| LGALSL   | -0.4047737 |
| LGI1     | -2.1639624 |
| LGMN     | -1.2363253 |
| LGR4     | -3.5332408 |
| LGR5     | -4.500259  |
| LGSN     | -2.3101892 |
| LHCGR    | -2.2023964 |
| LHFPL2   | -0.579968  |
| LHFPL4   | -0.7099366 |
| LHPP     | -3.3332357 |
| LHX2     | -5.509113  |
| LHX5     | -2.1217542 |
| LHX6     | -0.4014106 |
| LIAS     | -1.7122059 |
| LIF      | -0.4075635 |
| LIFR     | -2.6014328 |
| LIG3     | -0.571197  |

|            |            |
|------------|------------|
| LILRA5     | -0.9789574 |
| LIM2       | -1.2726779 |
| LIMD1      | -0.2685266 |
| LIMS2      | -0.6894994 |
| LIN28B     | -1.4647787 |
| LIN37      | -1.0288367 |
| LIN7A      | -7.9137144 |
| LIN7B      | -1.9761615 |
| LINGO1     | -3.8083491 |
| LINGO2     | -2.1830466 |
| LINGO4     | -0.829813  |
| LINS       | -0.1570363 |
| LIPA       | -3.193347  |
| LIPC       | -8.871091  |
| LIPI       | -2.090813  |
| LIPK       | -2.2262247 |
| LIPM       | -2.270961  |
| LIPO4      | -1.7316432 |
| LIPT1      | -2.6848855 |
| LIPT2      | -1.4396286 |
| LLGL1      | -2.112399  |
| LLGL2      | -1.6973734 |
| LLPH       | -0.3425322 |
| LMAN1      | -2.4922023 |
| LMAN2      | -1.3817558 |
| LMAN2L     | -0.4385128 |
| LMBR1L     | -0.3477559 |
| LMBRD1     | -1.4744496 |
| LMBRD2     | -0.6376498 |
| LMF1       | -2.4972887 |
| LMF2       | -0.5154924 |
| LMNA       | -0.6348896 |
| LMNB2      | -5.8827715 |
| LMO3       | -1.4666281 |
| LMOD1      | -1.9655213 |
| LMOD2      | -1.8261385 |
| LMOD3      | -0.478399  |
| LMX1A      | -2.4646814 |
| LOC1000488 | -15.450045 |
| LOC1008617 | -1.3976092 |
| LOC1008617 | -0.3126407 |
| LOC1008621 | -2.2501569 |
| LOC1008624 | -2.3565886 |
| LOC1010557 | -1.7807498 |
| LOC1010558 | -0.436439  |

LOC1010558: -0.5499425  
LOC1010558: -0.6889353  
LOC1010559: -0.934969  
LOC1010559: -2.204604  
LOC1010560: -0.4661036  
LOC1010560: -0.3246326  
LOC1026318: -0.9740865  
LOC1026319: -0.303  
LOC1026322: -0.2898417  
LOC1026322: -1.110822  
LOC1026323: -1.3636124  
LOC1026324: -0.5897646  
LOC1026324: -2.673913  
LOC1026324: -1.211041  
LOC1026327: -0.8120947  
LOC1026328: -1.7228417  
LOC1026330: -1.8869243  
LOC1026330: -2.1042285  
LOC1026331: -2.206859  
LOC1026334: -0.8923059  
LOC1026335: -0.1617937  
LOC1026336: -1.6825888  
LOC1026337: -2.1523135  
LOC1026338: -4.045076  
LOC1026340: -0.2853961  
LOC1026341: -1.606318  
LOC1026341: -0.5163198  
LOC1026344: -1.9296722  
LOC1026345: -2.7424061  
LOC1026345: -1.5035212  
LOC1026347: -0.5943995  
LOC1026349: -1.9771147  
LOC1026353: -1.4940131  
LOC1026354: -2.305323  
LOC1026355: -2.116058  
LOC1026356: -1.9905934  
LOC1026357: -1.7433443  
LOC1026357: -1.2766671  
LOC1026362: -0.9736099  
LOC1026366: -0.9225068  
LOC1026369: -3.4274616  
LOC1026370: -1.5033021  
LOC1026371: -0.2054992  
LOC1026372: -0.2075291  
LOC1026373: -0.7519074

LOC1026376: -1.2375686  
LOC1026377: -1.9328387  
LOC1026377: -1.2913942  
LOC1026378: -1.3351684  
LOC1026379: -2.087566  
LOC1026379: -1.4518256  
LOC1026381: -2.559579  
LOC1026382: -2.2147717  
LOC1026385: -1.1106615  
LOC1026386: -1.0439019  
LOC1026386: -2.1108236  
LOC1026386: -3.0121415  
LOC1026388: -0.3474054  
LOC1026388: -6.739231  
LOC1026389: -0.3464534  
LOC1026389: -0.893796  
LOC1026396: -2.3600097  
LOC1026396: -2.2734268  
LOC1026398: -2.5270429  
LOC1026399: -0.388587  
LOC1026399: -0.2827973  
LOC1026403: -0.249037  
LOC1026403: -1.345639  
LOC1026407: -2.186055  
LOC1026410: -1.3737788  
LOC1026410: -0.6598673  
LOC1026412: -0.5271094  
LOC1026412: -2.1229324  
LOC1026412: -0.7026477  
LOC1026412: -1.0792098  
LOC1026413: -11.185307  
LOC1026413: -2.1126237  
LOC1026413: -0.9520795  
LOC1026413: -0.9217806  
LOC1026413: -0.5243735  
LOC1026413: -0.4447889  
LOC1026413: -1.6887908  
LOC1026414: -0.9593301  
LOC1026415: -0.3691144  
LOC1026415: -4.464671  
LOC1026416: -1.5768409  
LOC1026416: -3.1292295  
LOC1026416: -3.7907577  
LOC1026416: -0.8519106  
LOC1026416: -4.115067

|            |            |
|------------|------------|
| LOC1026416 | -2.0347116 |
| LOC1026417 | -2.3142147 |
| LOC1026419 | -1.2598305 |
| LOC1026419 | -0.6097636 |
| LOC1026420 | -2.547426  |
| LOC1026420 | -2.1813467 |
| LOC1026420 | -2.2038383 |
| LOC1026421 | -2.1255298 |
| LOC1026422 | -0.2391329 |
| LOC1026422 | -1.5572562 |
| LOC1026423 | -1.7102997 |
| LOC1026423 | -3.131071  |
| LOC1026424 | -2.3517382 |
| LOC1026425 | -0.7344842 |
| LOC1026426 | -1.8065858 |
| LOC1026426 | -0.9936743 |
| LOC1026427 | -0.629415  |
| LOC1026428 | -0.7374568 |
| LOC1026428 | -2.154992  |
| LOC1026429 | -1.4881153 |
| LOC1026430 | -4.9147124 |
| LOC1026431 | -1.6067224 |
| LOC1026431 | -2.173901  |
| LOC1026432 | -0.5436482 |
| LOC171588  | -2.356852  |
| LOC547349  | -1.555479  |
| LOC630751  | -2.027443  |
| LOC675947  | -0.9569728 |
| LOH12CR1   | -1.7040627 |
| LONP1      | -2.284112  |
| LONP2      | -2.940127  |
| LONRF1     | -0.2575364 |
| LONRF2     | -1.7914631 |
| LOR        | -1.387281  |
| LOXL2      | -0.8736372 |
| LPAR5      | -1.9256108 |
| LPAR6      | -1.5001984 |
| LPCAT3     | -2.0284224 |
| LPCAT4     | -2.1300375 |
| LPGAT1     | -1.2359028 |
| LPIN1      | -1.902731  |
| LPIN3      | -0.2805796 |
| LPL        | -0.6043205 |
| LPP        | -0.3618383 |
| LRAT       | -1.3251987 |



|         |            |
|---------|------------|
| LRBA    | -0.6746502 |
| LRCOL1  | -0.7879322 |
| LRFN2   | -2.120664  |
| LRFN3   | -4.8997445 |
| LRFN5   | -1.3849599 |
| LRG1    | -1.6368685 |
| LRIG1   | -1.2708178 |
| LRIG2   | -0.4546757 |
| LRIG3   | -1.2179193 |
| LRIT1   | -7.7080727 |
| LRIT2   | -2.6011872 |
| LRP1    | -2.3059044 |
| LRP2BP  | -2.0679634 |
| LRP3    | -3.4879024 |
| LRP5    | -1.730691  |
| LRP8OS1 | -3.1346092 |
| LRPPRC  | -2.587161  |
| LRR1    | -0.5503573 |
| LRR14   | -1.2770014 |
| LRR14B  | -1.5082698 |
| LRR15   | -1.8881445 |
| LRR16B  | -1.4664972 |
| LRR18   | -0.724817  |
| LRR19   | -1.6443801 |
| LRR20   | -1.5432172 |
| LRR24   | -6.7919035 |
| LRR28   | -1.7639899 |
| LRR29   | -2.2052088 |
| LRR3    | -7.610231  |
| LRR30   | -1.7299194 |
| LRR31   | -0.4963007 |
| LRR39   | -1.7470994 |
| LRR3B   | -0.7341623 |
| LRR40   | -0.7001336 |
| LRR41   | -1.0899386 |
| LRR42   | -1.6163955 |
| LRR47   | -0.2445374 |
| LRR4C   | -1.6972616 |
| LRR52   | -2.078618  |
| LRR55   | -1.5000033 |
| LRR57   | -0.3364263 |
| LRR59   | -0.4816966 |
| LRR61   | -1.144072  |
| LRR66   | -2.3640406 |
| LRR69   | -2.1764736 |

|         |            |
|---------|------------|
| LRRC7   | -2.801724  |
| LRRC72  | -2.066727  |
| LRRC74  | -2.0578034 |
| LRRC8D  | -1.5220594 |
| LRRC9   | -1.740037  |
| LRRD1   | -2.1255903 |
| LRRIQ3  | -2.6290505 |
| LRRIQ4  | -1.9578731 |
| LRRTM1  | -0.6236687 |
| LRRTM2  | -1.3444538 |
| LRRTM3  | -1.6859851 |
| LRRTM4  | -1.746916  |
| LRSAM1  | -1.1978307 |
| LRTM1   | -5.778364  |
| LRWD1   | -0.1412554 |
| LSAMP   | -0.9985023 |
| LSG1    | -0.7441716 |
| LSM1    | -1.368362  |
| LSM10   | -1.306602  |
| LSM11   | -0.9868605 |
| LSM14B  | -0.7861753 |
| LSM2    | -1.4035258 |
| LSM6    | -0.4986615 |
| LSM7    | -0.845263  |
| LSR     | -3.3736691 |
| LSS     | -3.248476  |
| LTA4H   | -0.729104  |
| LTB4R2  | -0.5858805 |
| LTBR    | -1.1996083 |
| LUC7L2  | -1.5368133 |
| LUM     | -1.720571  |
| LURAP1L | -1.0277805 |
| LUZP2   | -2.6277106 |
| LUZP4   | -2.2658694 |
| LY6D    | -3.8171883 |
| LY6E    | -0.2317829 |
| LY6G5C  | -1.9847212 |
| LY6G6E  | -0.3378916 |
| LY6G6F  | -1.0647979 |
| LY86    | -0.6346731 |
| LY9     | -1.0406146 |
| LY96    | -0.9271336 |
| LYAR    | -1.8267698 |
| LYG1    | -2.0630863 |
| LYG2    | -2.0730612 |

|            |            |
|------------|------------|
| LYPD1      | -2.2755086 |
| LYPD4      | -2.0709515 |
| LYPD8      | -2.0294342 |
| LYPLA1     | -2.2821083 |
| LYPLA2     | -0.8617821 |
| LYPLAL1    | -4.175816  |
| LYRM4      | -1.04707   |
| LYRM5      | -2.8312807 |
| LYRM7      | -1.6417475 |
| LYRM9      | -3.172897  |
| LYSMD1     | -0.9571123 |
| LYSMD4     | -1.1124325 |
| LYZL1      | -2.164623  |
| LYZL4      | -0.3809364 |
| M6PR       | -0.7778416 |
| MAB21L1    | -2.1420033 |
| MAB21L2    | -1.4377966 |
| MACROD1    | -3.3295588 |
| MACROD2    | -1.5354929 |
| MAD1L1     | -1.6058779 |
| MAD2L1     | -0.8462017 |
| MAD2L2     | -1.8074074 |
| MADD       | -1.8498573 |
| MAF        | -2.6052322 |
| MAF1       | -0.4093585 |
| MAFB       | -3.2470524 |
| MAFG       | -0.4309902 |
| MAGEA1     | -1.2064357 |
| MAGEA10    | -1.949619  |
| MAGEA3     | -1.9949939 |
| MAGEA4     | -1.7586436 |
| MAGEA5     | -2.0881982 |
| MAGEA6     | -1.7864516 |
| MAGEB1     | -1.4106345 |
| MAGEB16    | -1.6966622 |
| MAGEB16-PS | -2.0143445 |
| MAGEB17-PS | -1.8293667 |
| MAGEB18    | -2.471115  |
| MAGEB4     | -2.056077  |
| MAGEB5     | -2.331029  |
| MAGED1     | -1.8676333 |
| MAGEH1     | -0.5918584 |
| MAGEL2     | -0.4051769 |
| MAGIX      | -3.8313048 |
| MALSU1     | -1.2299385 |

|           |            |
|-----------|------------|
| MAN1A     | -2.0632231 |
| MAN1A2    | -0.2555728 |
| MAN2A1    | -1.420804  |
| MAN2A2    | -0.8392639 |
| MAN2B1    | -1.5285697 |
| MAN2B2    | -2.2394671 |
| MAN2C1    | -0.3553963 |
| MAN2C1OS  | -1.4139695 |
| MANBA     | -1.6595035 |
| MANEA     | -2.100366  |
| MANF      | -0.5588822 |
| MANSC1    | -1.0499225 |
| MANSC4    | -1.2642379 |
| MAOA      | -0.3041272 |
| MAOB      | -4.7473106 |
| MAP1LC3A  | -1.2301087 |
| MAP1LC3B  | -0.5608592 |
| MAP2K2    | -2.1209168 |
| MAP2K3    | -1.3503532 |
| MAP2K4    | -0.8198743 |
| MAP2K5    | -1.2327747 |
| MAP2K6    | -3.8454366 |
| MAP2K7    | -1.0636177 |
| MAP3K10   | -0.4210627 |
| MAP3K11   | -0.2739825 |
| MAP3K13   | -1.222506  |
| MAP3K4    | -1.4402771 |
| MAP3K7CL  | -2.2430217 |
| MAP7      | -0.2511993 |
| MAPK14    | -1.1899123 |
| MAPK15    | -1.1423073 |
| MAPK1IP1L | -0.8159132 |
| MAPK3     | -0.3933067 |
| MAPK8     | -0.6203415 |
| MAPK9     | -1.6260147 |
| MAPKAP1   | -1.1869159 |
| MAPKAPK5  | -1.0088487 |
| MAPRE3    | -1.649714  |
| MARCO     | -1.4840889 |
| MARS      | -1.201767  |
| MARVELD1  | -1.603692  |
| MARVELD2  | -1.2969356 |
| MAS1      | -1.8596811 |
| MASP1     | -9.222     |
| MASP2     | -7.528864  |

|          |            |
|----------|------------|
| MAST1    | -1.6421266 |
| MAST3    | -1.1568027 |
| MASTL    | -1.1867547 |
| MAT1A    | -7.8664236 |
| MAT2B    | -0.3816991 |
| MATK     | -1.1313052 |
| MATN1    | -2.2537618 |
| MATN3    | -1.608393  |
| MAU2     | -0.5050831 |
| MAVS     | -2.9850554 |
| MB21D2   | -1.2050626 |
| MBD3     | -1.1088343 |
| MBD3L1   | -2.064053  |
| MBD3L2   | -2.1669986 |
| MBD6     | -0.1709976 |
| MBL1     | -8.132347  |
| MBL2     | -14.109379 |
| MBLAC1   | -1.3406055 |
| MBLAC2   | -2.2745848 |
| MBOAT4   | -2.0004048 |
| MBOAT7   | -0.650559  |
| MC1R     | -2.0833204 |
| MC2R     | -1.9812393 |
| MC3R     | -2.0839734 |
| MC4R     | -2.3555956 |
| MCAM     | -0.164566  |
| MCAT     | -1.8835807 |
| MCC      | -0.2524586 |
| MCCC1    | -2.1226964 |
| MCCC2    | -3.309744  |
| MCEE     | -2.6348238 |
| MCF2     | -2.2229745 |
| MCFD2    | -2.979794  |
| MCHR1    | -2.1037602 |
| MCM10    | -2.8038292 |
| MCM2     | -0.7849608 |
| MCM5     | -0.6089244 |
| MCM7     | -0.613513  |
| MCM8     | -0.6601055 |
| MCMD2C2  | -3.7076979 |
| MCOLN1   | -1.061532  |
| MCPH1    | -0.1904104 |
| MCPT1    | -2.1148763 |
| MCPT2    | -1.9873753 |
| MCPT-PS1 | -1.8335001 |

|         |            |
|---------|------------|
| MCTP2   | -0.2888184 |
| MCTS1   | -0.7126761 |
| MCTS2   | -1.6036611 |
| MCU     | -0.8014381 |
| MCUR1   | -1.0966024 |
| MDGA2   | -2.075048  |
| MDH1    | -3.0180054 |
| MDH2    | -1.3204346 |
| MDP1    | -0.7670207 |
| ME1     | -2.4445896 |
| MEA1    | -1.5492325 |
| MECOM   | -0.6356497 |
| MECR    | -2.620893  |
| MED12L  | -0.3786318 |
| MED15   | -0.2630315 |
| MED16   | -0.8339801 |
| MED20   | -0.5312161 |
| MED22   | -1.3458691 |
| MED24   | -0.3344045 |
| MED25   | -1.6714287 |
| MED28   | -0.4279418 |
| MED29   | -1.668385  |
| MED6    | -0.3977947 |
| MED8    | -1.2765493 |
| MED9    | -0.5895391 |
| MEDAG   | -1.1352491 |
| MEGF10  | -1.2852077 |
| MEI1    | -1.0939195 |
| MEI4    | -2.100443  |
| MEIOB   | -6.915598  |
| MEIS1   | -0.1859603 |
| MEIS2   | -0.6815176 |
| MEIS3   | -0.3440299 |
| MELK    | -0.7451067 |
| MEMO1   | -1.1699119 |
| MEN1    | -0.9972811 |
| MEP1A   | -2.0838203 |
| MEP1B   | -2.1273098 |
| MERTK   | -0.6825714 |
| MESDC2  | -0.7059593 |
| MEST    | -1.4008186 |
| MET     | -1.1305528 |
| METAP1  | -0.8988519 |
| METAP1D | -3.0369742 |
| METRN   | -1.7485495 |

|            |            |
|------------|------------|
| METTL1     | -0.8756156 |
| METTL11B   | -2.6603227 |
| METTL13    | -1.9271169 |
| METTL15    | -1.4451146 |
| METTL16    | -0.4246173 |
| METTL17    | -1.2899959 |
| METTL18    | -0.7012882 |
| METTL2     | -0.4874208 |
| METTL20    | -1.2317233 |
| METTL21A   | -1.8904352 |
| METTL22    | -2.7323363 |
| METTL4     | -0.5442102 |
| METTL5     | -2.187447  |
| METTL7A2HI | -2.3972058 |
| METTL7A3   | -0.8253727 |
| METTL7B    | -10.943281 |
| METTL8     | -1.1084468 |
| METTL9     | -0.5714879 |
| MEX3A      | -0.1767712 |
| MFHAS1     | -0.5989389 |
| MFI2       | -3.553026  |
| MFN1       | -1.287097  |
| MFN2       | -1.7577386 |
| MFSD1      | -0.8064175 |
| MFSD11     | -1.0430079 |
| MFSD12     | -1.2191238 |
| MFSD2A     | -3.6686091 |
| MFSD2B     | -0.4480171 |
| MFSD3      | -3.2179208 |
| MFSD5      | -0.5702176 |
| MFSD7C     | -1.708993  |
| MFSD8      | -0.52531   |
| MFSD9      | -2.496779  |
| MGAM       | -3.6299438 |
| MGAT1      | -0.9615626 |
| MGAT2      | -0.7969723 |
| MGAT4B     | -1.649128  |
| MGAT4C     | -1.4534009 |
| MGAT5B     | -1.4154325 |
| MGLL       | -3.3481922 |
| MGME1      | -2.534935  |
| MGMT       | -4.0656614 |
| MGRN1      | -0.5739594 |
| MGST1      | -3.1920571 |
| MGST2      | -2.2377682 |

|         |            |
|---------|------------|
| MGST3   | -0.9897566 |
| MIA2    | -4.1497917 |
| MIA3    | -1.5323434 |
| MIB2    | -1.0122633 |
| MICAL3  | -0.4307823 |
| MICALL2 | -1.1094065 |
| MICU1   | -0.676887  |
| MICU2   | -0.5122256 |
| MID1    | -0.4448104 |
| MIEF1   | -0.5322189 |
| MIEF2   | -1.5570724 |
| MIEN1   | -1.75524   |
| MIER2   | -1.4235358 |
| MIF     | -2.6968617 |
| MIF4GD  | -1.1593728 |
| MIIP    | -1.4169424 |
| MILL1   | -2.2604368 |
| MILR1   | -0.9233861 |
| MINA    | -0.9088574 |
| MINOS1  | -0.8482342 |
| MINPP1  | -1.6877232 |
| MIOX    | -6.275762  |
| MIP     | -3.368656  |
| MIPEP   | -1.9196362 |
| MIRG    | -1.8247027 |
| MIXL1   | -2.1070185 |
| MKKS    | -0.4584427 |
| MKL2    | -0.4261065 |
| MKLN1   | -0.6779985 |
| MKNK2   | -0.3688164 |
| MKRN2   | -0.9966383 |
| MKRN3   | -0.3014069 |
| MKX     | -2.986174  |
| MLEC    | -1.0352774 |
| MLF2    | -1.2377982 |
| MLH1    | -1.4113126 |
| MLH3    | -0.7743576 |
| MLST8   | -0.8316197 |
| MLX     | -1.3358245 |
| MLXIPL  | -4.6435103 |
| MLYCD   | -2.942225  |
| MMAA    | -1.3342052 |
| MMAB    | -3.056821  |
| MMACHC  | -2.1120162 |
| MMADHC  | -1.2402678 |



|         |            |
|---------|------------|
| MMD     | -2.467165  |
| MMEL1   | -2.0542328 |
| MMGT1   | -0.42731   |
| MMP10   | -1.8242576 |
| MMP15   | -0.7671814 |
| MMP19   | -1.6504664 |
| MMP1A   | -2.0486653 |
| MMP20   | -1.9882684 |
| MMP21   | -2.0613613 |
| MMP27   | -0.7227085 |
| MMP28   | -1.4800332 |
| MMP7    | -4.277832  |
| MMS22L  | -1.7171631 |
| MN1     | -1.5120091 |
| MNAT1   | -0.3514829 |
| MND1    | -1.914051  |
| MNX1    | -2.1445286 |
| MOB2    | -1.0734682 |
| MOB3B   | -1.4113629 |
| MOBP    | -2.7194433 |
| MOCOS   | -2.7649016 |
| MOCS1   | -1.4903574 |
| MOCS2   | -3.0450315 |
| MOCS3   | -0.8161311 |
| MOGAT1  | -1.1868849 |
| MOGAT2  | -3.699207  |
| MOGS    | -1.0561714 |
| MON1A   | -1.3792171 |
| MORC2A  | -0.3112454 |
| MORC4   | -1.3139322 |
| MORF4L1 | -0.4426913 |
| MORF4L2 | -0.5692034 |
| MORN1   | -0.9900999 |
| MORN2   | -1.4249437 |
| MOS     | -2.072307  |
| MOSPD2  | -1.0811949 |
| MOSPD3  | -2.2608771 |
| MOSPD4  | -0.5380464 |
| MOV10   | -1.6193023 |
| MOV10L1 | -1.6540523 |
| MOXD2   | -1.9682779 |
| MPC1    | -2.9802656 |
| MPC2    | -3.6044722 |
| MPDU1   | -2.3179054 |
| MPDZ    | -0.2692113 |

|          |            |
|----------|------------|
| MPEG1    | -1.1473827 |
| MPG      | -1.3180041 |
| MPI      | -1.8435464 |
| MPLKIP   | -0.7132926 |
| MPND     | -2.054412  |
| MPO      | -1.3312235 |
| MPP1     | -1.13691   |
| MPP4     | -2.8181982 |
| MPP6     | -2.95605   |
| MPPE1    | -1.5024436 |
| MPST     | -3.1805706 |
| MPV17    | -1.0759573 |
| MPV17L   | -2.5284612 |
| MPV17L2  | -1.738317  |
| MPZL2    | -3.092513  |
| MR1      | -1.2623689 |
| MRAP     | -6.5727077 |
| MRAP2    | -1.1864853 |
| MRC1     | -0.5920386 |
| MREG     | -4.957694  |
| MRFAP1   | -0.4574838 |
| MRGPRA1  | -2.2820346 |
| MRGPRA8  | -2.2138052 |
| MRGPRA9  | -2.2690969 |
| MRGPRB1  | -1.7239933 |
| MRGPRB13 | -2.1129675 |
| MRGPRB2  | -2.2439384 |
| MRGPRB3  | -2.098514  |
| MRGPRB5  | -2.2523992 |
| MRGPRB8  | -1.8291941 |
| MRGPRD   | -2.2365813 |
| MRGPRE   | -2.3910797 |
| MRGPRH   | -2.1818523 |
| MRGPRX1  | -2.120579  |
| MRI1     | -2.9080124 |
| MROH2A   | -2.8680649 |
| MROH2B   | -3.8533046 |
| MROH4    | -2.4168897 |
| MROH5    | -0.4594476 |
| MROH7    | -1.8547256 |
| MROH8    | -1.9977002 |
| MRPL1    | -1.4073706 |
| MRPL10   | -2.0205045 |
| MRPL11   | -1.8920102 |
| MRPL12   | -3.4213552 |

|        |            |
|--------|------------|
| MRPL13 | -1.8850069 |
| MRPL14 | -1.8640218 |
| MRPL15 | -2.693037  |
| MRPL16 | -2.3410168 |
| MRPL17 | -1.8780713 |
| MRPL18 | -1.4240384 |
| MRPL19 | -1.1154776 |
| MRPL2  | -2.2874646 |
| MRPL21 | -1.0865793 |
| MRPL22 | -1.9529891 |
| MRPL23 | -1.757091  |
| MRPL24 | -1.2279425 |
| MRPL27 | -2.200562  |
| MRPL28 | -2.2420506 |
| MRPL30 | -1.3212605 |
| MRPL32 | -1.0023417 |
| MRPL34 | -1.826386  |
| MRPL35 | -1.5619879 |
| MRPL36 | -1.6059308 |
| MRPL37 | -2.2778296 |
| MRPL38 | -2.0965972 |
| MRPL39 | -1.2394605 |
| MRPL4  | -1.1835132 |
| MRPL40 | -1.3328729 |
| MRPL41 | -1.3225188 |
| MRPL42 | -1.7761912 |
| MRPL43 | -1.2559657 |
| MRPL44 | -1.716136  |
| MRPL45 | -1.499795  |
| MRPL46 | -1.7269554 |
| MRPL47 | -1.2135692 |
| MRPL48 | -1.2586689 |
| MRPL49 | -1.7096057 |
| MRPL50 | -1.7888699 |
| MRPL51 | -1.2769628 |
| MRPL52 | -0.5873184 |
| MRPL53 | -1.0904236 |
| MRPL54 | -1.3038511 |
| MRPL55 | -2.0602403 |
| MRPL57 | -1.2175832 |
| MRPL9  | -1.5721583 |
| MRPS10 | -1.9643221 |
| MRPS11 | -2.1059504 |
| MRPS12 | -1.8684096 |
| MRPS14 | -1.1050754 |

|         |            |
|---------|------------|
| MRPS15  | -1.3062735 |
| MRPS16  | -1.6266785 |
| MRPS17  | -0.6126518 |
| MRPS18A | -0.6845412 |
| MRPS18B | -2.2478356 |
| MRPS18C | -0.6624055 |
| MRPS2   | -2.1405993 |
| MRPS21  | -1.206244  |
| MRPS22  | -1.6537242 |
| MRPS23  | -1.1603794 |
| MRPS24  | -2.1108985 |
| MRPS25  | -0.7120395 |
| MRPS26  | -1.4365168 |
| MRPS27  | -2.8123417 |
| MRPS28  | -1.8022165 |
| MRPS30  | -1.80268   |
| MRPS31  | -2.2112608 |
| MRPS33  | -1.088337  |
| MRPS34  | -2.4964075 |
| MRPS35  | -2.1804829 |
| MRPS36  | -0.7987804 |
| MRPS5   | -2.4717116 |
| MRPS7   | -2.0907912 |
| MRPS9   | -0.9250693 |
| MRRF    | -0.7816026 |
| MRS2    | -0.4401617 |
| MRTO4   | -0.6181479 |
| MS4A12  | -2.0277505 |
| MS4A13  | -2.1615002 |
| MS4A18  | -2.018404  |
| MS4A2   | -2.1193106 |
| MS4A4C  | -1.1372619 |
| MS4A5   | -1.9960785 |
| MSANTD4 | -0.5265036 |
| MSGN1   | -2.0188954 |
| MSH2    | -0.5702176 |
| MSH3    | -1.1274414 |
| MSH4    | -0.8292208 |
| MSH5    | -1.2632363 |
| MSL1    | -0.1914177 |
| MSMB    | -2.0559957 |
| MSMO1   | -2.8079104 |
| MSMP    | -1.9767544 |
| MSRA    | -3.6058178 |
| MSRB1   | -1.986877  |

|         |            |
|---------|------------|
| MSRB2   | -1.5768814 |
| MST1    | -8.772419  |
| MSTN    | -1.8551819 |
| MSTO1   | -0.8905106 |
| MT1     | -0.843533  |
| MT2     | -0.4010024 |
| MT4     | -0.8123951 |
| MTA1    | -0.893899  |
| MTA3    | -1.3483596 |
| MTAG2   | -2.3747406 |
| MTAP    | -2.806807  |
| MTCH2   | -2.2593985 |
| MTERF1A | -0.2843003 |
| MTERFD1 | -0.6050825 |
| MTERFD2 | -1.2030845 |
| MTERFD3 | -1.6624615 |
| MTFMT   | -1.2163601 |
| MTFP1   | -4.0945034 |
| MTFR1   | -2.4313183 |
| MTFR1L  | -1.227797  |
| MTFR2   | -1.8152809 |
| MTG1    | -2.5155635 |
| MTG2    | -1.6156101 |
| MTHFD1  | -3.530231  |
| MTHFR   | -0.8579698 |
| MTHFS   | -1.163456  |
| MTHFSD  | -1.3356974 |
| MTIF3   | -1.9344614 |
| MTL5    | -2.529616  |
| MTM1    | -0.405046  |
| MTMR1   | -0.8586426 |
| MTMR10  | -1.3267512 |
| MTMR11  | -2.569848  |
| MTMR4   | -1.0765324 |
| MTMR7   | -4.247406  |
| MTMR9   | -0.4851871 |
| MTNR1A  | -2.8200054 |
| MTO1    | -1.5984302 |
| MTOR    | -1.191467  |
| MTPAP   | -0.6559863 |
| MTRF1L  | -0.3005762 |
| MTSS1   | -2.645533  |
| MTTP    | -7.845195  |
| MTUS1   | -0.7678814 |
| MTX1    | -2.1031203 |

|          |            |
|----------|------------|
| MTX2     | -2.0138917 |
| MTX3     | -1.4387238 |
| MUC15    | -2.0910401 |
| MUC19    | -1.7607803 |
| MUC2     | -1.822813  |
| MUC3     | -2.0450687 |
| MUC6     | -1.2354112 |
| MUCL1    | -0.5518014 |
| MUG1     | -14.301244 |
| MUG2     | -14.937177 |
| MUL1     | -1.1485362 |
| MUM1     | -0.575943  |
| MUP1     | -13.916019 |
| MUP17    | -14.489769 |
| MUP19    | -15.274967 |
| MUP2     | -11.380484 |
| MUP20    | -12.831737 |
| MUP21    | -10.619654 |
| MUP3     | -12.830638 |
| MUP4     | -12.638853 |
| MUP5     | -11.752031 |
| MUP6     | -5.0218153 |
| MUP-PS12 | -10.595099 |
| MUS81    | -1.2107368 |
| MUT      | -2.226151  |
| MVB12A   | -1.2988577 |
| MVD      | -2.0415015 |
| MVK      | -2.2709365 |
| MXD3     | -1.2911067 |
| MXI1     | -0.9170594 |
| MYCBP    | -0.9610925 |
| MYCL     | -2.8605766 |
| MYCS     | -1.9999218 |
| MYCT1    | -0.9804373 |
| MYEOV2   | -0.6371498 |
| MYF5     | -2.1741168 |
| MYF6     | -1.661149  |
| MYG1     | -1.7566147 |
| MYH1     | -2.1914356 |
| MYH13    | -1.5381329 |
| MYH15    | -1.5802436 |
| MYH2     | -2.1638176 |
| MYH4     | -1.862709  |
| MYL10    | -2.2328095 |
| MYL2     | -1.7354791 |

|          |            |
|----------|------------|
| MYL6     | -0.363358  |
| MYL6B    | -0.758738  |
| MYLIP    | -0.711473  |
| MYLK4    | -1.9963117 |
| MYLPF    | -0.9923227 |
| MYO15    | -1.3813655 |
| MYO16    | -1.6440015 |
| MYO19    | -0.5247092 |
| MYO1E    | -0.3101654 |
| MYO3A    | -2.0755985 |
| MYO7A    | -2.0404606 |
| MYO7B    | -4.709583  |
| MYOD1    | -2.0966423 |
| MYOG     | -2.1599698 |
| MYOZ1    | -1.663522  |
| MYOZ3    | -1.4358413 |
| MYPN     | -2.295421  |
| MYPOP    | -0.9904926 |
| MYRFL    | -3.3240094 |
| MYT1     | -2.2726116 |
| MYT1L    | -1.4031274 |
| MZB1     | -0.5854559 |
| MZT2     | -2.3687181 |
| N4BP2L1  | -1.7988753 |
| N4BP2OS  | -1.653141  |
| N6AMT1   | -1.1530237 |
| N6AMT2   | -0.5699873 |
| NAA10    | -1.8648038 |
| NAA11    | -3.6650152 |
| NAA15    | -0.1814342 |
| NAA20    | -0.4833384 |
| NAA35    | -0.5545516 |
| NAA38    | -1.3699989 |
| NAA50    | -0.7270875 |
| NAA60    | -1.6941938 |
| NAALADL1 | -1.4740007 |
| NAALADL2 | -1.8648782 |
| NAB2     | -1.2376981 |
| NABP2    | -1.1487823 |
| NACA     | -0.4055047 |
| NACC1    | -0.3123369 |
| NACC2    | -0.9496727 |
| NADK     | -0.3110237 |
| NADK2    | -4.1778626 |
| NADSYN1  | -3.556797  |

|         |            |
|---------|------------|
| NAGA    | -1.3113031 |
| NAGK    | -0.9478068 |
| NAGLU   | -2.7381806 |
| NAGPA   | -0.9277496 |
| NAGS    | -8.250261  |
| NAIP1   | -0.3009899 |
| NALCN   | -2.3986826 |
| NANOS3  | -3.7088873 |
| NANP    | -2.7486267 |
| NANS    | -0.5123563 |
| NAP1L2  | -1.2889578 |
| NAP1L3  | -0.6517091 |
| NAP1L5  | -1.7327061 |
| NAPA    | -0.9836531 |
| NAPG    | -0.5833707 |
| NAPRT1  | -4.9224052 |
| NARF    | -2.1254776 |
| NARFL   | -1.78405   |
| NARG2   | -0.4889748 |
| NARS    | -0.5324984 |
| NARS2   | -0.7095647 |
| NAT1    | -2.54178   |
| NAT10   | -1.1917386 |
| NAT2    | -2.2770987 |
| NAT3    | -1.9783659 |
| NAT6    | -2.4579506 |
| NAT8    | -4.4979353 |
| NAT9    | -1.7311192 |
| NAV2    | -0.8353128 |
| NBAS    | -0.8795803 |
| NBR1    | -0.7837091 |
| NCALD   | -0.3881595 |
| NCAM2   | -1.8488204 |
| NCAPD2  | -0.3855739 |
| NCAPD3  | -0.2536416 |
| NCAPG   | -1.2929044 |
| NCAPG2  | -0.6541929 |
| NCAPH2  | -0.5567904 |
| NCDN    | -0.3799949 |
| NCEH1   | -0.4210134 |
| NCKAP1  | -0.4392095 |
| NCKIPSD | -0.8137586 |
| NCLN    | -1.959548  |
| NCMAP   | -0.8170071 |
| NCOA2   | -0.738368  |



|         |            |
|---------|------------|
| NCOA4   | -1.4239335 |
| NCOA5   | -0.2955136 |
| NCTC1   | -1.0159063 |
| ND1     | -2.6479793 |
| ND2     | -2.1112747 |
| ND3     | -2.1108356 |
| ND4     | -1.3856893 |
| ND4L    | -2.3901644 |
| ND5     | -2.3740406 |
| NDC1    | -0.9855862 |
| NDFIP1  | -1.7238688 |
| NDFIP2  | -2.352664  |
| NDNL2   | -0.3301606 |
| NDOR1   | -0.3935919 |
| NDRG2   | -4.786659  |
| NDRG3   | -0.6936789 |
| NDST1   | -0.8496385 |
| NDST2   | -1.7337871 |
| NDUFA1  | -1.6517162 |
| NDUFA10 | -1.710401  |
| NDUFA11 | -1.1736379 |
| NDUFA12 | -1.3713017 |
| NDUFA13 | -1.9634786 |
| NDUFA2  | -1.7816525 |
| NDUFA3  | -1.693418  |
| NDUFA4  | -2.3831062 |
| NDUFA5  | -1.69558   |
| NDUFA6  | -1.9801741 |
| NDUFA7  | -1.6561289 |
| NDUFA8  | -2.0832424 |
| NDUFA9  | -2.812232  |
| NDUFAB1 | -2.149766  |
| NDUFAF1 | -1.7265997 |
| NDUFAF2 | -1.5924511 |
| NDUFAF3 | -1.1096025 |
| NDUFAF4 | -1.8652649 |
| NDUFAF5 | -1.2723844 |
| NDUFAF6 | -3.3288121 |
| NDUFAF7 | -1.2820301 |
| NDUFB10 | -2.2510233 |
| NDUFB11 | -2.0391617 |
| NDUFB2  | -1.6053557 |
| NDUFB3  | -0.9774485 |
| NDUFB4  | -1.5702863 |
| NDUFB5  | -1.8730583 |

|         |            |
|---------|------------|
| NDUFB6  | -2.077939  |
| NDUFB7  | -1.628211  |
| NDUFB8  | -1.8739924 |
| NDUFB9  | -2.2908564 |
| NDUFC1  | -1.5643797 |
| NDUFC2  | -1.0757122 |
| NDUFS1  | -2.062757  |
| NDUFS2  | -2.1365504 |
| NDUFS3  | -2.046297  |
| NDUFS4  | -1.9642339 |
| NDUFS5  | -1.5413194 |
| NDUFS6  | -2.3270698 |
| NDUFS7  | -1.6736913 |
| NDUFS8  | -2.2472672 |
| NDUFV1  | -2.5878668 |
| NDUFV2  | -2.0966687 |
| NDUFV3  | -2.4725895 |
| NECAB1  | -4.7202506 |
| NECAB2  | -0.9237061 |
| NECAP1  | -1.2798553 |
| NEDD4   | -0.5546966 |
| NEFM    | -1.6668615 |
| NEGR1   | -0.5161145 |
| NEIL2   | -0.7500296 |
| NEIL3   | -0.3851962 |
| NEK10   | -2.1109767 |
| NEK2    | -1.7012188 |
| NEK3    | -0.557508  |
| NEK4    | -1.0162077 |
| NEK6    | -1.5056963 |
| NELFA   | -0.5347099 |
| NELFCD  | -1.8021517 |
| NELFE   | -1.2867436 |
| NELL1   | -2.109274  |
| NESPAS  | -2.188543  |
| NETO1   | -1.8476706 |
| NEU1    | -1.8864098 |
| NEU2    | -3.0826952 |
| NEU4    | -2.0399878 |
| NEURL1B | -1.8621812 |
| NEURL2  | -1.6197548 |
| NEUROD1 | -2.9631996 |
| NEUROD4 | -2.3332164 |
| NEUROD6 | -2.2037365 |
| NEUROG2 | -2.1088545 |

|           |            |
|-----------|------------|
| NFIA      | -0.8511274 |
| NFIB      | -0.6633506 |
| NFIC      | -1.5448985 |
| NFIX      | -1.1183233 |
| NFKBIB    | -0.2683125 |
| NFKBIL1   | -0.5985704 |
| NFS1      | -2.0253587 |
| NFU1      | -1.6808    |
| NFX1      | -0.6488442 |
| NFXL1     | -0.6769052 |
| NFYB      | -0.7941594 |
| NFYC      | -1.052495  |
| NGEF      | -4.3940153 |
| NGF       | -2.1710212 |
| NGFR      | -3.5129864 |
| NGRN      | -0.8203845 |
| NHEJ1     | -1.1372995 |
| NHLH2     | -2.1024652 |
| NHLRC1    | -2.1106188 |
| NHLRC3    | -1.0607488 |
| NHP2      | -0.5973826 |
| NHSL1     | -0.6502979 |
| NICN1     | -2.7619793 |
| NIF3L1    | -1.5919032 |
| NIFK      | -0.6911535 |
| NINJ1     | -1.4969897 |
| NIPA2     | -0.6424036 |
| NIPAL1    | -4.6667356 |
| NIPAL4    | -2.0270433 |
| NIPSNAP1  | -7.4389677 |
| NIPSNAP3A | -2.1393514 |
| NIPSNAP3B | -2.2958722 |
| NISCH     | -0.2403626 |
| NIT1      | -2.6719394 |
| NIT2      | -5.136003  |
| NKD2      | -2.8109593 |
| NKIRAS1   | -1.7532864 |
| NKIRAS2   | -0.8751278 |
| NKX1-2    | -2.352561  |
| NKX2-2    | -1.7946303 |
| NKX2-3    | -0.5657876 |
| NKX2-6    | -1.6434557 |
| NKX2-9    | -1.8133473 |
| NKX3-1    | -2.2027452 |
| NKX6-2    | -3.8494706 |

|          |            |
|----------|------------|
| NKX6-3   | -2.3962173 |
| NLE1     | -1.0755391 |
| NLGN1    | -2.1124923 |
| NLN      | -1.6443238 |
| NLRP12   | -0.5077701 |
| NLRP14   | -2.6219263 |
| NLRP1B   | -0.6031432 |
| NLRP2    | -2.2318354 |
| NLRP4A   | -1.5536122 |
| NLRP4B   | -2.1155267 |
| NLRP4E   | -2.2205267 |
| NLRP4G   | -1.8378825 |
| NLRP5-PS | -1.807766  |
| NLRP6    | -7.3265295 |
| NLRP9A   | -1.605684  |
| NLRP9B   | -2.5139475 |
| NLRP9C   | -1.0955856 |
| NLRX1    | -0.9904938 |
| NMD3     | -0.9588342 |
| NME1     | -1.3878374 |
| NME2     | -1.9770021 |
| NME4     | -2.6487012 |
| NME6     | -2.65984   |
| NME7     | -1.0326257 |
| NMI      | -0.2993808 |
| NMNAT1   | -1.8396611 |
| NMNAT3   | -2.6628842 |
| NMRAL1   | -2.7623487 |
| NMRK1    | -3.7239594 |
| NMS      | -1.7186456 |
| NMT1     | -0.5757427 |
| NMU      | -1.0088472 |
| NNMT     | -4.3287582 |
| NNT      | -2.7362995 |
| NOA1     | -0.3163471 |
| NOB1     | -0.4258084 |
| NOBOX    | -1.804621  |
| NOC2L    | -0.8507891 |
| NOC4L    | -0.4120464 |
| NODAL    | -1.4898448 |
| NOL12    | -0.6143022 |
| NOL4     | -1.8150904 |
| NOL6     | -0.9411321 |
| NOL7     | -0.9293132 |
| NOMO1    | -0.469574  |

|          |            |
|----------|------------|
| NONO     | -0.4774218 |
| NOP10    | -0.7726784 |
| NOP16    | -2.1448274 |
| NOP2     | -0.3308325 |
| NOS1     | -1.2672062 |
| NOS1AP   | -0.4997709 |
| NOSIP    | -0.7444644 |
| NOTO     | -1.6842744 |
| NOTUM    | -3.0793223 |
| NOTUMOS  | -5.8891716 |
| NOX3     | -2.1012583 |
| NOXA1    | -1.0807133 |
| NPAS3    | -2.0339277 |
| NPAT     | -1.684228  |
| NPB      | -1.8238411 |
| NPC1     | -2.8974113 |
| NPC1L1   | -1.8139617 |
| NPEPL1   | -2.4925761 |
| NPHP3    | -0.6455772 |
| NPHS1OS  | -2.1045969 |
| NPLOC4   | -1.6408839 |
| NPM3-PS1 | -1.6403348 |
| NPRL2    | -1.3302321 |
| NPRL3    | -1.8933821 |
| NPS      | -1.6661072 |
| NPTX1    | -2.292667  |
| NPTX2    | -1.6808553 |
| NPY      | -2.3117232 |
| NPY2R    | -1.9934754 |
| NPY5R    | -1.9937756 |
| NPY6R    | -2.1160858 |
| NQO1     | -3.3271618 |
| NQO2     | -4.1041617 |
| NR0B1    | -1.9431725 |
| NR0B2    | -7.242122  |
| NR1D1    | -1.8713291 |
| NR1D2    | -1.4153671 |
| NR1H3    | -2.2385755 |
| NR1H4    | -9.597657  |
| NR1H5    | -4.9192867 |
| NR1I2    | -9.599568  |
| NR1I3    | -8.329412  |
| NR2C1    | -0.5981112 |
| NR2C2AP  | -1.6221137 |
| NR2E1    | -2.1672125 |

|         |            |
|---------|------------|
| NR2E3   | -2.110785  |
| NR2F2   | -0.6888766 |
| NR2F6   | -3.1158442 |
| NR3C2   | -1.841466  |
| NR5A1   | -1.8028512 |
| NR5A2   | -4.2034454 |
| NRAP    | -1.0970085 |
| NRBF2   | -1.1433167 |
| NRBP1   | -0.7231569 |
| NRBP2   | -0.4545159 |
| NRDE2   | -0.9012375 |
| NRG3    | -2.3108864 |
| NRG4    | -3.1159327 |
| NRIP2   | -2.6213164 |
| NRK     | -2.2099814 |
| NRL     | -2.1291115 |
| NRM     | -0.4728077 |
| NRN1    | -5.3962154 |
| NRP     | -1.8034561 |
| NRTN    | -0.5296955 |
| NRXN1   | -1.3963857 |
| NRXN2   | -0.4810948 |
| NSA2    | -0.6442838 |
| NSDHL   | -3.219153  |
| NSFL1C  | -0.5307117 |
| NSL1    | -0.8759909 |
| NSMAF   | -0.3411012 |
| NSMCE4A | -0.5267034 |
| NSMF    | -2.1277661 |
| NSUN2   | -0.600194  |
| NSUN3   | -1.0095022 |
| NSUN4   | -0.7037163 |
| NSUN5   | -0.9099321 |
| NT5C    | -0.7657223 |
| NT5C1A  | -0.8164108 |
| NT5C2   | -1.3686953 |
| NT5DC1  | -1.2932801 |
| NT5DC3  | -0.8420749 |
| NT5E    | -2.712194  |
| NT5M    | -2.070314  |
| NTAN1   | -0.3443751 |
| NTF3    | -0.8062594 |
| NTHL1   | -1.7484941 |
| NTM     | -2.723376  |
| NTMT1   | -0.6983891 |

|          |            |
|----------|------------|
| NTN3     | -3.281137  |
| NTNG1    | -1.0774727 |
| NTPCR    | -1.3517141 |
| NTRK1    | -1.5633509 |
| NUBP1    | -1.3601995 |
| NUBP2    | -1.3190856 |
| NUBPL    | -2.4921913 |
| NUCB1    | -1.3043356 |
| NUCKS1   | -0.5923977 |
| NUDC     | -0.5323358 |
| NUDCD1   | -0.5454652 |
| NUDCD2   | -2.124618  |
| NUDT1    | -3.1284838 |
| NUDT12   | -3.6233249 |
| NUDT14   | -2.0453796 |
| NUDT16   | -1.6923118 |
| NUDT16L1 | -1.0694637 |
| NUDT18   | -2.0718732 |
| NUDT19   | -3.0825028 |
| NUDT2    | -1.7485247 |
| NUDT21   | -0.3072953 |
| NUDT22   | -2.0976157 |
| NUDT4    | -1.7481966 |
| NUDT5    | -1.4591827 |
| NUDT6    | -2.6256204 |
| NUDT7    | -5.1373405 |
| NUDT8    | -3.208405  |
| NUDT9    | -0.9697871 |
| NUF2     | -0.6062493 |
| NUFIP1   | -2.1634326 |
| NUGGC    | -2.9667087 |
| NUP155   | -1.3017054 |
| NUP210   | -0.4662757 |
| NUP37    | -0.9596953 |
| NUP43    | -0.4954953 |
| NUP50    | -0.9703941 |
| NUP62CL  | -1.4743252 |
| NUP85    | -0.2104063 |
| NUP88    | -0.2535873 |
| NUPL2    | -0.8654726 |
| NUSAP1   | -0.4261227 |
| NUTF2    | -0.8399959 |
| NUTM1    | -2.0872798 |
| NXF3     | -1.9480183 |
| NXF7     | -1.6337295 |

|         |            |
|---------|------------|
| NXN     | -0.5308404 |
| NXNL1   | -2.4320915 |
| NXPE2   | -5.7599974 |
| NXPH1   | -1.6183677 |
| NXPH2   | -2.1339846 |
| NXT1    | -0.2394819 |
| NXT2    | -0.6744037 |
| NYAP1   | -0.8962567 |
| NYAP2   | -1.7283711 |
| OAF     | -6.2121763 |
| OARD1   | -1.454493  |
| OAS1B   | -1.2945437 |
| OAS1E   | -1.0174956 |
| OAS1H   | -2.154662  |
| OAT     | -1.8734455 |
| OAZ1    | -1.2859445 |
| OAZ3    | -2.8070624 |
| OBOX1   | -1.1529875 |
| OBOX3   | -1.7987347 |
| OBOX5   | -1.7410347 |
| OBOX6   | -2.180961  |
| OBP2A   | -2.1723933 |
| OC90    | -0.6988988 |
| OCA2    | -2.277701  |
| OCEL1   | -0.5944471 |
| OCIAD1  | -1.1433449 |
| OCIAD2  | -3.1966922 |
| OCLN    | -0.507329  |
| OCSTAMP | -1.524044  |
| ODAM    | -1.8819904 |
| ODF1    | -3.6771724 |
| ODF3    | -1.4672041 |
| ODF3B   | -0.7403989 |
| ODF3L1  | -1.2498043 |
| ODF4    | -2.7759743 |
| OFCC1   | -2.0503347 |
| OGDH    | -0.7192226 |
| OGDHL   | -2.5391061 |
| OGFOD1  | -2.0094676 |
| OGFOD2  | -1.9577022 |
| OGFOD3  | -1.5902147 |
| OGFR    | -0.2858319 |
| OGG1    | -1.0273492 |
| OIP5    | -1.6149218 |
| OIT3    | -5.886168  |



|             |            |
|-------------|------------|
| OLA1        | -1.0971785 |
| OLFM3       | -2.1791809 |
| OLFML1      | -2.198086  |
| OLFML2A     | -1.5578928 |
| OLFR1       | -3.0322976 |
| OLFR10      | -1.4316878 |
| OLFR100     | -2.233572  |
| OLFR1002    | -2.2384987 |
| OLFR1006    | -2.1472383 |
| OLFR1008    | -1.2495623 |
| OLFR1009    | -1.4487448 |
| OLFR101     | -2.1233742 |
| OLFR1010    | -2.2350378 |
| OLFR1013    | -2.2516088 |
| OLFR1014    | -1.9595046 |
| OLFR1015    | -2.7642925 |
| OLFR1016    | -2.1928248 |
| OLFR1019    | -1.9836841 |
| OLFR102     | -2.095987  |
| OLFR1020    | -2.1129155 |
| OLFR1022    | -2.1254141 |
| OLFR1023    | -2.2979774 |
| OLFR1024    | -5.174476  |
| OLFR1028    | -1.7399008 |
| OLFR1029    | -2.0159736 |
| OLFR1031    | -2.1803145 |
| OLFR1033    | -1.5225654 |
| OLFR1038-PS | -2.0628364 |
| OLFR1039    | -1.8783116 |
| OLFR1044    | -2.370577  |
| OLFR1045    | -2.0052848 |
| OLFR1047    | -2.1499798 |
| OLFR1048    | -2.122126  |
| OLFR1049    | -5.1331406 |
| OLFR1051    | -2.1548853 |
| OLFR1052    | -2.2402816 |
| OLFR1053    | -2.1509485 |
| OLFR1055    | -1.4139218 |
| OLFR1057    | -3.203647  |
| OLFR1058    | -2.172089  |
| OLFR105-PS  | -2.5943422 |
| OLFR1062    | -1.9807441 |
| OLFR1066    | -2.0469232 |
| OLFR107     | -2.3650084 |
| OLFR1076    | -2.1140876 |

|             |            |
|-------------|------------|
| OLFR1079    | -1.9776006 |
| OLFR108     | -2.0235286 |
| OLFR1080    | -2.5309508 |
| OLFR1082    | -2.309794  |
| OLFR1087    | -2.0685346 |
| OLFR109     | -2.1580973 |
| OLFR1093    | -2.22378   |
| OLFR1094    | -2.1182914 |
| OLFR1095    | -1.9744153 |
| OLFR1097    | -2.087038  |
| OLFR1099    | -2.738049  |
| OLFR1100    | -1.808162  |
| OLFR1102    | -3.1966648 |
| OLFR1104    | -2.2084458 |
| OLFR1105    | -2.2699878 |
| OLFR1106    | -1.9003499 |
| OLFR1109    | -2.1557233 |
| OLFR111     | -2.5229378 |
| OLFR1111    | -2.3030257 |
| OLFR1112    | -2.321164  |
| OLFR1115    | -0.5987573 |
| OLFR1116-PS | -2.1628053 |
| OLFR1118    | -2.0135329 |
| OLFR112     | -1.9896655 |
| OLFR1120    | -1.8175669 |
| OLFR1121    | -2.2854311 |
| OLFR1122    | -1.9129891 |
| OLFR1124    | -1.5402379 |
| OLFR1126    | -2.221461  |
| OLFR1128    | -1.7637808 |
| OLFR1129    | -2.0754094 |
| OLFR113     | -2.111443  |
| OLFR1130    | -2.2274659 |
| OLFR1132    | -2.3088307 |
| OLFR1133    | -2.0922115 |
| OLFR1141    | -1.171726  |
| OLFR1145    | -1.8522081 |
| OLFR1148    | -2.0136323 |
| OLFR1153    | -3.8917267 |
| OLFR1155    | -2.0631323 |
| OLFR1158    | -1.6061919 |
| OLFR116     | -1.9479437 |
| OLFR1160    | -2.2928758 |
| OLFR1161    | -2.0675828 |
| OLFR1163    | -2.1538122 |

|          |            |
|----------|------------|
| OLFR1164 | -2.2138805 |
| OLFR1166 | -2.239621  |
| OLFR1167 | -2.1833944 |
| OLFR117  | -2.2816157 |
| OLFR1170 | -2.1103034 |
| OLFR1173 | -2.3434002 |
| OLFR1176 | -2.219259  |
| OLFR1178 | -2.3497095 |
| OLFR1179 | -3.044803  |
| OLFR118  | -2.9623735 |
| OLFR1181 | -2.661314  |
| OLFR1182 | -2.0899866 |
| OLFR1183 | -2.0736356 |
| OLFR1186 | -2.638392  |
| OLFR1188 | -2.1111593 |
| OLFR1189 | -2.490815  |
| OLFR119  | -2.3406332 |
| OLFR1195 | -2.2951055 |
| OLFR1196 | -2.2716727 |
| OLFR1197 | -1.8865128 |
| OLFR1200 | -2.281465  |
| OLFR1201 | -2.3517241 |
| OLFR1204 | -2.1963377 |
| OLFR1205 | -2.1043968 |
| OLFR1206 | -3.4386218 |
| OLFR1208 | -2.2594986 |
| OLFR1209 | -2.258708  |
| OLFR121  | -1.7656872 |
| OLFR1211 | -2.138239  |
| OLFR1212 | -2.2099643 |
| OLFR1213 | -2.1652768 |
| OLFR1216 | -2.0466473 |
| OLFR1217 | -2.1478329 |
| OLFR1218 | -2.068605  |
| OLFR1219 | -2.2197342 |
| OLFR122  | -0.2873659 |
| OLFR1221 | -2.2486897 |
| OLFR1222 | -2.0728211 |
| OLFR1223 | -2.3072567 |
| OLFR1225 | -2.0919976 |
| OLFR1226 | -1.8163528 |
| OLFR1228 | -2.2258902 |
| OLFR123  | -1.6045346 |
| OLFR1230 | -1.7317743 |
| OLFR1231 | -2.5873916 |

|             |            |
|-------------|------------|
| OLFR1233    | -2.0929327 |
| OLFR1239    | -2.327015  |
| OLFR124     | -1.5119834 |
| OLFR1240    | -2.0011766 |
| OLFR1242    | -2.0647907 |
| OLFR1245    | -3.0766983 |
| OLFR1246    | -2.3719997 |
| OLFR1247    | -2.2473161 |
| OLFR1248    | -2.1023118 |
| OLFR1249    | -1.0591378 |
| OLFR125     | -2.0159173 |
| OLFR1252    | -0.4198916 |
| OLFR1253    | -2.188156  |
| OLFR1254    | -2.1607969 |
| OLFR1255    | -5.17395   |
| OLFR1256    | -2.0822709 |
| OLFR1257    | -1.079428  |
| OLFR1258    | -1.46609   |
| OLFR126     | -2.4031405 |
| OLFR1260    | -5.158141  |
| OLFR1263    | -2.1973205 |
| OLFR1265    | -1.6665223 |
| OLFR127     | -2.008329  |
| OLFR1270    | -2.1159115 |
| OLFR1272    | -2.0683355 |
| OLFR1275    | -1.9608355 |
| OLFR1276    | -2.1337025 |
| OLFR1277    | -2.2627826 |
| OLFR1279    | -2.6283324 |
| OLFR128     | -4.0373244 |
| OLFR1280    | -2.0199764 |
| OLFR1281    | -1.9927409 |
| OLFR1283    | -2.1991882 |
| OLFR1284    | -2.305365  |
| OLFR1285    | -2.2228012 |
| OLFR1286    | -1.6458232 |
| OLFR1287    | -2.402854  |
| OLFR1288    | -3.8592975 |
| OLFR1290    | -2.3381362 |
| OLFR1294    | -2.3027184 |
| OLFR1295    | -2.1651936 |
| OLFR1297    | -2.2586157 |
| OLFR1298    | -2.0207462 |
| OLFR1299    | -2.0687702 |
| OLFR1300-PS | -1.9751871 |

|          |            |
|----------|------------|
| OLFR1301 | -2.1230614 |
| OLFR1302 | -2.173728  |
| OLFR1303 | -1.1407661 |
| OLFR1306 | -2.2190049 |
| OLFR1307 | -1.751276  |
| OLFR1308 | -3.8453877 |
| OLFR1309 | -2.0022237 |
| OLFR1313 | -2.2937899 |
| OLFR1314 | -1.6104307 |
| OLFR1316 | -2.4770823 |
| OLFR1317 | -5.30194   |
| OLFR1320 | -2.042935  |
| OLFR1322 | -1.749373  |
| OLFR1323 | -1.7059045 |
| OLFR1325 | -2.120798  |
| OLFR1328 | -2.5887113 |
| OLFR1329 | -2.233605  |
| OLFR133  | -1.5857086 |
| OLFR1337 | -2.4334102 |
| OLFR1338 | -2.1319447 |
| OLFR134  | -1.8942313 |
| OLFR1340 | -1.8068404 |
| OLFR1346 | -2.2142177 |
| OLFR1347 | -0.4635873 |
| OLFR1349 | -0.6939709 |
| OLFR135  | -1.6413393 |
| OLFR1350 | -1.630161  |
| OLFR1351 | -2.9469755 |
| OLFR1353 | -2.0741613 |
| OLFR1354 | -1.6089771 |
| OLFR1356 | -2.3145316 |
| OLFR1357 | -2.1386607 |
| OLFR1358 | -1.0458927 |
| OLFR136  | -2.347429  |
| OLFR1360 | -1.9968421 |
| OLFR1361 | -1.8756094 |
| OLFR1362 | -2.7497506 |
| OLFR1366 | -3.057937  |
| OLFR137  | -2.1549418 |
| OLFR1370 | -2.248041  |
| OLFR1377 | -2.3019428 |
| OLFR138  | -2.3592267 |
| OLFR1385 | -2.1604407 |
| OLFR1386 | -2.259426  |
| OLFR1387 | -2.079692  |

|          |            |
|----------|------------|
| OLFR1389 | -2.0118375 |
| OLFR139  | -2.303478  |
| OLFR1390 | -2.0832098 |
| OLFR1391 | -2.2018359 |
| OLFR1393 | -0.827745  |
| OLFR140  | -2.2576845 |
| OLFR1406 | -2.1602156 |
| OLFR1408 | -2.1200995 |
| OLFR1412 | -1.7035785 |
| OLFR1414 | -3.2638614 |
| OLFR1415 | -1.5306208 |
| OLFR1416 | -2.0530174 |
| OLFR1418 | -2.0494034 |
| OLFR1419 | -2.3033717 |
| OLFR142  | -2.2426147 |
| OLFR1423 | -0.8100989 |
| OLFR1424 | -2.0492842 |
| OLFR1425 | -1.6221704 |
| OLFR1426 | -2.212263  |
| OLFR1427 | -2.190315  |
| OLFR143  | -2.2236762 |
| OLFR1431 | -1.7617092 |
| OLFR1436 | -1.5149031 |
| OLFR1440 | -2.2335901 |
| OLFR1441 | -1.7746177 |
| OLFR1442 | -2.2219148 |
| OLFR1444 | -2.257514  |
| OLFR1445 | -1.177238  |
| OLFR1447 | -2.012273  |
| OLFR1448 | -2.2813888 |
| OLFR1449 | -1.6582987 |
| OLFR1450 | -1.8969047 |
| OLFR1453 | -1.9328008 |
| OLFR1457 | -2.1873765 |
| OLFR1458 | -2.2187126 |
| OLFR1459 | -1.0725522 |
| OLFR146  | -2.4464457 |
| OLFR1461 | -1.6830921 |
| OLFR1462 | -2.0700994 |
| OLFR1463 | -2.1286504 |
| OLFR1465 | -3.676618  |
| OLFR1466 | -3.527273  |
| OLFR1467 | -2.011735  |
| OLFR1469 | -2.1033144 |
| OLFR147  | -2.004791  |

|             |            |
|-------------|------------|
| OLFR1471    | -1.8712742 |
| OLFR1472    | -2.1422997 |
| OLFR1475    | -1.9499617 |
| OLFR1477    | -2.07086   |
| OLFR148     | -2.1482654 |
| OLFR1480    | -2.0190492 |
| OLFR1484    | -2.0143182 |
| OLFR1489    | -1.8788161 |
| OLFR149     | -0.7447431 |
| OLFR1491    | -2.2063186 |
| OLFR1494    | -2.0541754 |
| OLFR1495    | -2.1129072 |
| OLFR1499    | -2.1938126 |
| OLFR150     | -2.0453982 |
| OLFR1500    | -0.871233  |
| OLFR1501    | -2.070373  |
| OLFR1504    | -2.1054652 |
| OLFR1507    | -1.3760393 |
| OLFR1509    | -3.788544  |
| OLFR151     | -1.7198701 |
| OLFR1510    | -2.073372  |
| OLFR1511    | -2.1988401 |
| OLFR1512    | -2.019833  |
| OLFR152     | -0.1855183 |
| OLFR153     | -2.5725782 |
| OLFR1532-PS | -2.1573186 |
| OLFR1535    | -2.0918689 |
| OLFR1537    | -2.6806233 |
| OLFR154     | -2.216198  |
| OLFR155     | -1.9780738 |
| OLFR157     | -2.480263  |
| OLFR159     | -0.289638  |
| OLFR160     | -2.1898992 |
| OLFR164     | -2.0615668 |
| OLFR165     | -2.2048466 |
| OLFR166     | -2.2878754 |
| OLFR167     | -2.0310109 |
| OLFR168     | -2.0505884 |
| OLFR169     | -2.0516067 |
| OLFR17      | -2.7433577 |
| OLFR171     | -2.1158836 |
| OLFR172     | -2.2626102 |
| OLFR173     | -2.1531036 |
| OLFR175-PS1 | -2.1182728 |
| OLFR176     | -3.7747264 |

|             |            |
|-------------|------------|
| OLFR178     | -1.9790373 |
| OLFR180     | -2.0058966 |
| OLFR181     | -2.2033455 |
| OLFR183     | -2.0406313 |
| OLFR186     | -2.1525748 |
| OLFR187     | -1.4030831 |
| OLFR19      | -2.290118  |
| OLFR190     | -1.8646994 |
| OLFR191     | -2.358721  |
| OLFR193     | -1.6392109 |
| OLFR194     | -2.221857  |
| OLFR195     | -4.599084  |
| OLFR196     | -2.205007  |
| OLFR197     | -2.2420733 |
| OLFR198     | -3.4427807 |
| OLFR199     | -1.6729975 |
| OLFR2       | -1.7667985 |
| OLFR20      | -2.861929  |
| OLFR202     | -2.1175508 |
| OLFR203     | -2.1789677 |
| OLFR204     | -2.5281153 |
| OLFR205     | -2.3088198 |
| OLFR206     | -2.1968627 |
| OLFR207     | -1.015481  |
| OLFR209     | -1.5785561 |
| OLFR211     | -1.5865319 |
| OLFR212     | -1.5787511 |
| OLFR214     | -2.0355062 |
| OLFR223     | -2.295159  |
| OLFR225     | -2.1081312 |
| OLFR228     | -1.950778  |
| OLFR229     | -2.3528433 |
| OLFR22-PS1  | -2.0793684 |
| OLFR231     | -2.0488527 |
| OLFR235     | -2.0713797 |
| OLFR237-PS1 | -1.5992634 |
| OLFR24      | -2.1452496 |
| OLFR242     | -3.2228723 |
| OLFR243     | -2.0409858 |
| OLFR248     | -4.2793574 |
| OLFR25      | -2.3481216 |
| OLFR250     | -3.081873  |
| OLFR251     | -2.0547676 |
| OLFR262     | -2.0037837 |
| OLFR263     | -2.3211403 |



|            |            |
|------------|------------|
| OLFR266    | -1.9846287 |
| OLFR27     | -2.2822661 |
| OLFR270    | -2.2771766 |
| OLFR273    | -2.0289848 |
| OLFR275    | -3.8148475 |
| OLFR279    | -0.8938017 |
| OLFR281    | -2.1941035 |
| OLFR282    | -1.8240533 |
| OLFR284    | -2.2811534 |
| OLFR285    | -1.6751194 |
| OLFR286    | -2.0849628 |
| OLFR288    | -2.0634565 |
| OLFR290    | -2.7367911 |
| OLFR291    | -2.3677888 |
| OLFR292    | -2.0592356 |
| OLFR293    | -1.9876773 |
| OLFR294    | -2.3013642 |
| OLFR295    | -2.1110232 |
| OLFR298    | -2.211945  |
| OLFR299    | -2.2327218 |
| OLFR29-PS1 | -2.4372866 |
| OLFR3      | -2.3399184 |
| OLFR303    | -2.1681113 |
| OLFR304    | -2.1956213 |
| OLFR305    | -2.046879  |
| OLFR307    | -1.3116591 |
| OLFR309    | -2.2707312 |
| OLFR31     | -2.3514953 |
| OLFR310    | -1.5941973 |
| OLFR311    | -2.3670337 |
| OLFR314    | -1.8353996 |
| OLFR315    | -2.0561938 |
| OLFR316    | -1.9371407 |
| OLFR318    | -2.3379605 |
| OLFR319    | -0.1667869 |
| OLFR320    | -1.9513097 |
| OLFR322    | -1.7485695 |
| OLFR325    | -2.3390894 |
| OLFR329-PS | -2.0013146 |
| OLFR33     | -2.2203252 |
| OLFR330    | -2.4972584 |
| OLFR331    | -1.9925647 |
| OLFR332    | -1.3557825 |
| OLFR340    | -2.1689014 |
| OLFR341    | -1.9987042 |

|             |            |
|-------------|------------|
| OLFR342     | -2.2927034 |
| OLFR344     | -2.1026092 |
| OLFR346     | -2.119561  |
| OLFR347     | -2.0577226 |
| OLFR350     | -2.1939409 |
| OLFR351     | -2.62137   |
| OLFR353     | -1.0304966 |
| OLFR354     | -1.908412  |
| OLFR355     | -3.7237844 |
| OLFR360     | -2.3516645 |
| OLFR361     | -2.0262103 |
| OLFR366     | -2.221736  |
| OLFR368     | -1.7846978 |
| OLFR370     | -2.0350986 |
| OLFR372     | -2.2196126 |
| OLFR373     | -1.1045055 |
| OLFR38      | -1.6633759 |
| OLFR381     | -2.1702137 |
| OLFR384     | -2.144825  |
| OLFR385     | -2.1196768 |
| OLFR390     | -2.8900719 |
| OLFR392     | -0.9034309 |
| OLFR393     | -2.363076  |
| OLFR394     | -1.5634866 |
| OLFR395     | -2.07787   |
| OLFR397     | -5.2146273 |
| OLFR399     | -2.2266166 |
| OLFR401     | -1.918659  |
| OLFR402     | -2.2556245 |
| OLFR403     | -1.8148375 |
| OLFR406     | -1.8600984 |
| OLFR411     | -2.7284603 |
| OLFR412     | -2.1821516 |
| OLFR417     | -0.754571  |
| OLFR418-PS1 | -2.0135045 |
| OLFR419     | -2.1429036 |
| OLFR421-PS1 | -2.0474274 |
| OLFR424     | -4.770979  |
| OLFR427     | -1.9112759 |
| OLFR43      | -2.2113664 |
| OLFR434     | -1.9468694 |
| OLFR435     | -2.1125078 |
| OLFR437     | -2.23385   |
| OLFR44      | -2.1815023 |
| OLFR441     | -2.2983167 |

|         |            |
|---------|------------|
| OLFR444 | -2.070079  |
| OLFR447 | -1.7064247 |
| OLFR448 | -2.120518  |
| OLFR449 | -1.234376  |
| OLFR45  | -2.339432  |
| OLFR450 | -2.1019163 |
| OLFR452 | -2.1552353 |
| OLFR459 | -1.9295609 |
| OLFR460 | -1.7529087 |
| OLFR461 | -2.2445307 |
| OLFR463 | -1.5763888 |
| OLFR467 | -2.237812  |
| OLFR47  | -0.8927777 |
| OLFR472 | -1.7054589 |
| OLFR473 | -2.1925285 |
| OLFR474 | -1.6388073 |
| OLFR478 | -2.1136453 |
| OLFR479 | -2.191529  |
| OLFR48  | -2.278056  |
| OLFR480 | -1.7726476 |
| OLFR481 | -1.3619127 |
| OLFR483 | -1.9836664 |
| OLFR484 | -1.6650805 |
| OLFR485 | -2.1393144 |
| OLFR486 | -2.086578  |
| OLFR487 | -2.3435073 |
| OLFR488 | -2.122083  |
| OLFR49  | -0.8634763 |
| OLFR491 | -2.2433825 |
| OLFR492 | -2.3007836 |
| OLFR493 | -2.3450053 |
| OLFR494 | -2.1883113 |
| OLFR497 | -1.9949131 |
| OLFR498 | -2.0736578 |
| OLFR5   | -1.844259  |
| OLFR502 | -1.575274  |
| OLFR503 | -2.069232  |
| OLFR506 | -2.0865736 |
| OLFR507 | -2.1836474 |
| OLFR508 | -2.2482953 |
| OLFR509 | -1.7139266 |
| OLFR51  | -2.2430472 |
| OLFR516 | -2.0844004 |
| OLFR518 | -1.4724045 |
| OLFR519 | -2.0340447 |

|         |            |
|---------|------------|
| OLFR52  | -1.9800377 |
| OLFR520 | -1.6366241 |
| OLFR522 | -0.5424578 |
| OLFR525 | -2.209434  |
| OLFR527 | -2.2092667 |
| OLFR53  | -1.6359403 |
| OLFR530 | -2.0232806 |
| OLFR531 | -1.9003372 |
| OLFR532 | -2.6934106 |
| OLFR533 | -1.7837639 |
| OLFR535 | -2.1120443 |
| OLFR536 | -2.5145507 |
| OLFR538 | -4.1441164 |
| OLFR54  | -2.2150922 |
| OLFR541 | -1.7216575 |
| OLFR543 | -1.0124543 |
| OLFR545 | -2.00904   |
| OLFR547 | -1.447485  |
| OLFR549 | -2.3414118 |
| OLFR55  | -2.4225712 |
| OLFR550 | -2.8590188 |
| OLFR551 | -1.0370622 |
| OLFR552 | -0.8773062 |
| OLFR554 | -2.8137977 |
| OLFR557 | -1.9746869 |
| OLFR558 | -1.9140427 |
| OLFR559 | -0.6850271 |
| OLFR560 | -2.2002254 |
| OLFR561 | -2.0725281 |
| OLFR564 | -2.662387  |
| OLFR566 | -1.1861348 |
| OLFR568 | -1.75318   |
| OLFR57  | -2.0514023 |
| OLFR570 | -2.2960973 |
| OLFR572 | -2.1849084 |
| OLFR575 | -2.1733406 |
| OLFR577 | -2.224     |
| OLFR58  | -1.8837752 |
| OLFR583 | -2.1020765 |
| OLFR584 | -2.067725  |
| OLFR586 | -1.792886  |
| OLFR589 | -1.672023  |
| OLFR59  | -2.3662677 |
| OLFR591 | -2.1358027 |
| OLFR592 | -2.5879726 |

|         |            |
|---------|------------|
| OLFR594 | -2.23649   |
| OLFR596 | -2.363767  |
| OLFR598 | -1.9629717 |
| OLFR599 | -1.5736046 |
| OLFR60  | -1.5477815 |
| OLFR600 | -2.323495  |
| OLFR601 | -1.7138462 |
| OLFR605 | -2.7010858 |
| OLFR606 | -2.2363708 |
| OLFR607 | -1.7323594 |
| OLFR608 | -2.1726081 |
| OLFR610 | -2.0683267 |
| OLFR611 | -1.7464614 |
| OLFR612 | -1.2733669 |
| OLFR613 | -2.1658888 |
| OLFR615 | -1.8177292 |
| OLFR616 | -1.7043052 |
| OLFR617 | -2.0631475 |
| OLFR618 | -2.0268996 |
| OLFR619 | -2.2911599 |
| OLFR62  | -2.3343375 |
| OLFR620 | -2.1555977 |
| OLFR622 | -2.0898006 |
| OLFR623 | -2.2256944 |
| OLFR624 | -2.1820686 |
| OLFR63  | -1.4707191 |
| OLFR630 | -2.4056923 |
| OLFR631 | -2.5209908 |
| OLFR633 | -1.9609747 |
| OLFR638 | -3.7214394 |
| OLFR639 | -2.0856614 |
| OLFR640 | -2.1330962 |
| OLFR641 | -2.0269246 |
| OLFR642 | -1.8270607 |
| OLFR643 | -1.6127396 |
| OLFR644 | -2.441266  |
| OLFR645 | -1.9786959 |
| OLFR646 | -2.152955  |
| OLFR648 | -2.2204814 |
| OLFR65  | -2.0964098 |
| OLFR651 | -2.1769092 |
| OLFR653 | -1.9374905 |
| OLFR654 | -3.7461863 |
| OLFR656 | -2.9174995 |
| OLFR657 | -5.3511143 |

|         |            |
|---------|------------|
| OLFR658 | -1.9730022 |
| OLFR659 | -1.7762375 |
| OLFR66  | -2.3475707 |
| OLFR661 | -2.1552837 |
| OLFR663 | -2.1135588 |
| OLFR666 | -1.2048523 |
| OLFR668 | -1.9832664 |
| OLFR669 | -1.938251  |
| OLFR67  | -1.9654412 |
| OLFR671 | -0.5121236 |
| OLFR672 | -1.9453843 |
| OLFR675 | -2.1423857 |
| OLFR676 | -1.7934594 |
| OLFR677 | -2.0751975 |
| OLFR678 | -1.7618015 |
| OLFR68  | -2.3524973 |
| OLFR683 | -2.0423052 |
| OLFR685 | -2.1533957 |
| OLFR686 | -1.633975  |
| OLFR687 | -2.1858232 |
| OLFR688 | -2.099507  |
| OLFR689 | -2.1857119 |
| OLFR69  | -2.115077  |
| OLFR690 | -2.0531    |
| OLFR691 | -2.3377025 |
| OLFR692 | -1.9856701 |
| OLFR693 | -3.1990643 |
| OLFR694 | -2.0006566 |
| OLFR697 | -2.204984  |
| OLFR698 | -2.0924785 |
| OLFR699 | -2.3454945 |
| OLFR70  | -2.7196727 |
| OLFR701 | -1.5814595 |
| OLFR702 | -3.7382221 |
| OLFR703 | -1.6769996 |
| OLFR704 | -2.4614995 |
| OLFR707 | -2.4222057 |
| OLFR71  | -1.6978285 |
| OLFR711 | -2.1019464 |
| OLFR713 | -0.9308903 |
| OLFR716 | -2.0674262 |
| OLFR722 | -1.7935739 |
| OLFR724 | -2.2801406 |
| OLFR725 | -2.062922  |
| OLFR726 | -2.0038688 |

|            |            |
|------------|------------|
| OLFR727    | -2.1892762 |
| OLFR728    | -1.3802476 |
| OLFR729    | -1.9683177 |
| OLFR73     | -0.6080871 |
| OLFR730    | -1.863934  |
| OLFR731    | -1.9577272 |
| OLFR732    | -2.1815276 |
| OLFR733    | -2.271842  |
| OLFR734    | -2.797322  |
| OLFR736    | -2.1015937 |
| OLFR739    | -2.0388908 |
| OLFR740    | -4.9652524 |
| OLFR742    | -2.185119  |
| OLFR743    | -2.0388227 |
| OLFR744    | -1.7233686 |
| OLFR745    | -1.6881566 |
| OLFR746    | -2.0272024 |
| OLFR747    | -2.2702308 |
| OLFR748    | -2.1762476 |
| OLFR749    | -2.0619264 |
| OLFR75-PS1 | -0.5553892 |
| OLFR761    | -2.1160588 |
| OLFR764    | -1.5887587 |
| OLFR766    | -1.7535987 |
| OLFR767    | -1.5262513 |
| OLFR768    | -1.7995017 |
| OLFR769    | -2.198063  |
| OLFR77     | -2.2686315 |
| OLFR770    | -2.5006003 |
| OLFR771    | -2.2424285 |
| OLFR772    | -1.6434264 |
| OLFR773    | -3.2184908 |
| OLFR774    | -2.042066  |
| OLFR775    | -2.2688537 |
| OLFR776    | -2.0754373 |
| OLFR78     | -1.7016716 |
| OLFR781    | -2.1175013 |
| OLFR782    | -2.0805097 |
| OLFR784    | -2.1342213 |
| OLFR788    | -2.170456  |
| OLFR791    | -2.1529417 |
| OLFR792    | -1.5348115 |
| OLFR794    | -2.082907  |
| OLFR796    | -3.2006557 |
| OLFR798    | -2.2181354 |

|         |            |
|---------|------------|
| OLFR799 | -2.0341606 |
| OLFR8   | -1.7579236 |
| OLFR800 | -1.4775982 |
| OLFR801 | -1.9086642 |
| OLFR802 | -2.2524388 |
| OLFR803 | -2.1268532 |
| OLFR804 | -1.6549196 |
| OLFR805 | -1.7694259 |
| OLFR806 | -2.8928938 |
| OLFR807 | -2.0691676 |
| OLFR808 | -2.754278  |
| OLFR809 | -2.1168566 |
| OLFR810 | -1.992877  |
| OLFR811 | -2.194556  |
| OLFR812 | -2.1004205 |
| OLFR813 | -2.2532115 |
| OLFR815 | -1.2556498 |
| OLFR816 | -2.0851257 |
| OLFR818 | -2.2378004 |
| OLFR820 | -1.5697675 |
| OLFR821 | -0.9278829 |
| OLFR822 | -2.238948  |
| OLFR824 | -1.897136  |
| OLFR825 | -3.6129034 |
| OLFR826 | -1.9269185 |
| OLFR827 | -2.043813  |
| OLFR828 | -1.5196455 |
| OLFR832 | -2.1649435 |
| OLFR834 | -1.8348334 |
| OLFR835 | -2.0837276 |
| OLFR837 | -2.0698311 |
| OLFR843 | -1.1774733 |
| OLFR845 | -4.276731  |
| OLFR846 | -3.009957  |
| OLFR847 | -1.764863  |
| OLFR851 | -2.0831304 |
| OLFR853 | -1.6389365 |
| OLFR854 | -1.7832134 |
| OLFR855 | -1.6935537 |
| OLFR857 | -2.0883186 |
| OLFR859 | -2.1281824 |
| OLFR862 | -2.1455321 |
| OLFR867 | -2.2705173 |
| OLFR868 | -1.1884899 |
| OLFR869 | -2.372991  |



|         |            |
|---------|------------|
| OLFR870 | -0.9548798 |
| OLFR872 | -2.0703251 |
| OLFR873 | -3.3266106 |
| OLFR874 | -2.203402  |
| OLFR875 | -1.9958866 |
| OLFR877 | -2.1690173 |
| OLFR878 | -1.9187691 |
| OLFR881 | -1.6968355 |
| OLFR883 | -2.1014736 |
| OLFR884 | -1.8051472 |
| OLFR885 | -2.0780025 |
| OLFR888 | -1.9230657 |
| OLFR889 | -3.4179716 |
| OLFR890 | -2.2137318 |
| OLFR891 | -0.5865648 |
| OLFR893 | -2.1154225 |
| OLFR894 | -1.932764  |
| OLFR895 | -2.072232  |
| OLFR899 | -2.0087285 |
| OLFR90  | -2.3376267 |
| OLFR900 | -2.1533914 |
| OLFR902 | -2.2830877 |
| OLFR904 | -2.542858  |
| OLFR905 | -1.7819705 |
| OLFR908 | -2.0400648 |
| OLFR91  | -2.143755  |
| OLFR910 | -1.8158331 |
| OLFR912 | -2.198083  |
| OLFR917 | -2.74735   |
| OLFR918 | -2.3633046 |
| OLFR919 | -1.9863913 |
| OLFR92  | -2.132793  |
| OLFR922 | -2.5399323 |
| OLFR923 | -2.3034556 |
| OLFR924 | -1.9990175 |
| OLFR926 | -2.0708256 |
| OLFR93  | -2.3414643 |
| OLFR930 | -2.0551434 |
| OLFR933 | -1.9719286 |
| OLFR935 | -2.1048295 |
| OLFR936 | -2.1127875 |
| OLFR937 | -2.284092  |
| OLFR938 | -2.2389998 |
| OLFR943 | -1.6797433 |
| OLFR944 | -2.1024756 |

|             |            |
|-------------|------------|
| OLFR947-PS1 | -2.3423667 |
| OLFR948     | -2.0095382 |
| OLFR95      | -2.8022723 |
| OLFR951     | -1.8603821 |
| OLFR952     | -2.2363105 |
| OLFR954     | -2.1654975 |
| OLFR955     | -2.1430984 |
| OLFR959     | -2.2867289 |
| OLFR960     | -2.1668794 |
| OLFR961     | -2.317764  |
| OLFR967     | -2.0880735 |
| OLFR968     | -2.1269503 |
| OLFR97      | -0.7741001 |
| OLFR970     | -2.2138264 |
| OLFR971     | -1.5191982 |
| OLFR972     | -2.044089  |
| OLFR975     | -2.1904197 |
| OLFR976     | -1.6746557 |
| OLFR982     | -2.4241066 |
| OLFR983     | -2.0356488 |
| OLFR987     | -2.1591697 |
| OLFR988     | -2.1878037 |
| OLFR99      | -1.8600025 |
| OLFR992     | -2.1690001 |
| OLFR993     | -2.2615552 |
| OLFR995     | -2.1257675 |
| OLFR996     | -2.1267004 |
| OLIG1       | -5.247711  |
| OMA1        | -0.8158321 |
| OMG         | -1.6020057 |
| OMP         | -0.4932551 |
| OMT2A       | -2.1059237 |
| OMT2B       | -1.7470064 |
| ONECUT1     | -7.1593523 |
| ONECUT2     | -9.580016  |
| ONECUT3     | -2.0736651 |
| OOEP        | -1.461021  |
| OOG3        | -1.9376812 |
| OOSP1       | -1.9057193 |
| OOSP3       | -1.7933292 |
| OPA1        | -1.5506783 |
| OPA3        | -1.6646552 |
| OPALIN      | -2.1979787 |
| OPCML       | -1.6893854 |
| OPLAH       | -2.8522253 |

|         |            |
|---------|------------|
| OPN1MW  | -1.3875074 |
| OPN1SW  | -2.076517  |
| OPN5    | -1.0475421 |
| OPRD1   | -1.59816   |
| OPTN    | -1.4890013 |
| ORAI1   | -0.3855505 |
| ORAI3   | -0.4968462 |
| ORC3    | -0.8808508 |
| ORC5    | -1.3423989 |
| ORLY    | -1.6992986 |
| ORM1    | -7.238154  |
| ORM2    | -7.445548  |
| ORM3    | -5.463317  |
| ORMDL1  | -1.2004733 |
| ORMDL2  | -1.2653894 |
| ORMDL3  | -2.1405625 |
| OS9     | -1.2720747 |
| OSBP    | -0.6678929 |
| OSBP2   | -1.4009647 |
| OSBPL1A | -3.7117095 |
| OSBPL2  | -0.7473345 |
| OSCAR   | -1.0897961 |
| OSGEP   | -1.1500459 |
| OSGEPL1 | -2.4391584 |
| OSGIN1  | -5.090073  |
| OST4    | -1.6818686 |
| OSTC    | -0.9433937 |
| OSTM1   | -0.296063  |
| OTC     | -9.973651  |
| OTOA    | -2.346598  |
| OTOG    | -0.4069729 |
| OTOGL   | -2.3364563 |
| OTOL1   | -2.015315  |
| OTOP2   | -1.8783851 |
| OTOP3   | -1.5309186 |
| OTOR    | -1.9437428 |
| OTOS    | -1.2035656 |
| OTP     | -2.40427   |
| OTUB1   | -1.7718406 |
| OTUB2   | -0.6000085 |
| OTUD3   | -0.6879215 |
| OTUD6A  | -1.6894794 |
| OTUD6B  | -0.9144974 |
| OTUD7A  | -1.7238708 |
| OTULIN  | -1.5563359 |

|             |            |
|-------------|------------|
| OTX1        | -2.2262483 |
| OVCA2       | -0.5355363 |
| OVOL2       | -0.3710361 |
| OVOL3       | -2.0312076 |
| OXA1L       | -1.2355299 |
| OXGR1       | -2.1489496 |
| OXLD1       | -3.1837673 |
| OXNAD1      | -3.06846   |
| OXR1        | -0.600265  |
| OXSM        | -2.3201468 |
| P2RX2       | -0.3630076 |
| P2RX3       | -0.9948728 |
| P2RX4       | -0.9930902 |
| P2RX6       | -0.896302  |
| P2RX7       | -0.2372451 |
| P2RY1       | -0.5133891 |
| P2RY12      | -0.370815  |
| P2RY4       | -2.3202589 |
| P4HB        | -3.5347252 |
| PABPC1L2B-F | -1.8242872 |
| PABPC4L     | -1.4152339 |
| PABPC6      | -2.079081  |
| PACRGL      | -1.0785108 |
| PACSIN1     | -0.5505538 |
| PACSIN3     | -3.1863995 |
| PAFAH1B3    | -0.8454194 |
| PAFAH2      | -3.3002872 |
| PAGR1A      | -0.7958674 |
| PAH         | -14.417759 |
| PAICS       | -2.128364  |
| PAIP1       | -0.2970266 |
| PAK1        | -0.2825868 |
| PAK1IP1     | -0.6638632 |
| PAK4        | -1.5988355 |
| PALB2       | -1.1416607 |
| PALLD       | -0.8931298 |
| PALM        | -0.7625284 |
| PALM3       | -1.8543689 |
| PALMD       | -1.3554797 |
| PAM16       | -1.0062995 |
| PAN2        | -0.9676418 |
| PANK1       | -6.8358016 |
| PANX3       | -2.2887003 |
| PAOX        | -3.6817188 |
| PAPD4       | -0.347805  |

|           |            |
|-----------|------------|
| PAPD5     | -1.0460091 |
| PAPD7     | -0.4815779 |
| PAPL      | -2.083045  |
| PAPLN     | -0.3769329 |
| PAPOLB    | -1.7312405 |
| PAPSS2    | -4.426286  |
| PAQR3     | -1.560039  |
| PAQR7     | -2.4004579 |
| PAQR9     | -9.355356  |
| PARD3     | -0.3431897 |
| PARD3BOS1 | -1.9025211 |
| PARD6A    | -1.2795081 |
| PARK2     | -1.6544456 |
| PARK7     | -2.2421627 |
| PARL      | -0.2256112 |
| PARN      | -1.8109756 |
| PARP1     | -1.2902308 |
| PARP12    | -0.4655676 |
| PARP16    | -3.323489  |
| PARP6     | -0.3119235 |
| PARPBP    | -0.7160251 |
| PARS2     | -2.0680332 |
| PARVG     | -0.2285738 |
| PASK      | -0.5470851 |
| PATE2     | -2.3486826 |
| PATE4     | -1.5764413 |
| PATL2     | -0.8550303 |
| PAX1      | -1.9361615 |
| PAX2      | -2.8853118 |
| PAX6      | -2.1948156 |
| PAX6OS1   | -1.9883139 |
| PAX7      | -2.1850328 |
| PAX8      | -2.2846138 |
| PAX9      | -1.7637293 |
| PBDC1     | -0.6977487 |
| PBK       | -1.458991  |
| PBLD1     | -1.1547122 |
| PBLD2     | -8.255474  |
| PBP2      | -2.0289006 |
| PCBD1     | -6.1549454 |
| PCBD2     | -1.2343354 |
| PCBP1     | -0.2077246 |
| PCBP2     | -0.3801141 |
| PCBP4     | -2.325158  |
| PCCA      | -2.763389  |

|         |            |
|---------|------------|
| PCCB    | -1.2749407 |
| PCDH1   | -2.2371278 |
| PCDH10  | -1.598741  |
| PCDH11X | -1.029285  |
| PCDH12  | -2.368043  |
| PCDH15  | -2.0671928 |
| PCDH8   | -2.0155177 |
| PCDHA11 | -2.0356007 |
| PCDHAC1 | -1.9511714 |
| PCDHB12 | -0.7563598 |
| PCED1A  | -1.303946  |
| PCGF1   | -0.9058836 |
| PCGF6   | -1.5839252 |
| PCID2   | -0.9590812 |
| PCK1    | -7.49684   |
| PCLO    | -0.5044899 |
| PCMTD1  | -1.8668756 |
| PCNXL3  | -0.6984825 |
| PCP2    | -1.6909151 |
| PCP4L1  | -2.8086414 |
| PCSK1N  | -1.149004  |
| PCSK4   | -4.0832386 |
| PCSK6   | -5.0451574 |
| PCSK7   | -1.0320239 |
| PCSK9   | -8.941774  |
| PCTP    | -5.9241886 |
| PCX     | -4.080582  |
| PCYOX1  | -2.8974314 |
| PCYT2   | -4.7363505 |
| PDAP1   | -1.0837221 |
| PDC     | -2.0768697 |
| PDCD2   | -1.3262992 |
| PDCD2L  | -0.6947079 |
| PDCD5   | -0.566988  |
| PDCD6   | -1.336865  |
| PDCL    | -0.3992991 |
| PDCL2   | -2.1620178 |
| PDDC1   | -1.7117004 |
| PDE10A  | -0.8246052 |
| PDE11A  | -0.5349333 |
| PDE1C   | -1.2111402 |
| PDE2A   | -2.2000651 |
| PDE3B   | -3.2744079 |
| PDE4DIP | -1.2073073 |
| PDE6A   | -1.412951  |

|         |            |
|---------|------------|
| PDE6C   | -3.461955  |
| PDE6G   | -0.4277873 |
| PDE6H   | -0.6096122 |
| PDE8A   | -1.3780985 |
| PDE9A   | -1.5402713 |
| PDF     | -1.5086026 |
| PDGFC   | -2.3896902 |
| PDHA1   | -0.6759386 |
| PDHA2   | -2.3279595 |
| PDHB    | -1.452601  |
| PDHX    | -1.1753569 |
| PDIA4   | -1.1019769 |
| PDIA5   | -2.8721933 |
| PDIA6   | -1.2205606 |
| PDIK1L  | -0.2177706 |
| PDILT   | -7.32119   |
| PDK1    | -3.0560951 |
| PDK2    | -3.57656   |
| PDLIM4  | -0.8343067 |
| PDP2    | -2.8712401 |
| PDPK1   | -0.2235227 |
| PDSS1   | -0.8634534 |
| PDSS2   | -1.9970765 |
| PDX1    | -2.0456262 |
| PDXDC1  | -0.9029126 |
| PDXK    | -2.3137956 |
| PDXK-PS | -2.2830317 |
| PDXP    | -3.0547953 |
| PDYN    | -1.0486917 |
| PDZD11  | -0.6625967 |
| PDZD7   | -1.9841695 |
| PDZD9   | -1.0152225 |
| PDZK1   | -8.508864  |
| PEBP1   | -1.1588569 |
| PEBP4   | -2.0057993 |
| PECR    | -7.0679946 |
| PEF1    | -0.9073539 |
| PEG10   | -1.1227767 |
| PEG12   | -0.647799  |
| PELI2   | -0.8512449 |
| PELI3   | -1.4386225 |
| PELO    | -0.9099398 |
| PELP1   | -0.6795635 |
| PEMT    | -8.298124  |
| PEO1    | -2.6962569 |

|         |            |
|---------|------------|
| PEPD    | -1.6240506 |
| PER2    | -0.4770947 |
| PER3    | -1.5058455 |
| PERP    | -2.8431091 |
| PET112  | -3.1953645 |
| PET2    | -2.0916827 |
| PEX1    | -2.776092  |
| PEX10   | -2.122285  |
| PEX11A  | -2.3200555 |
| PEX11B  | -1.9297667 |
| PEX11G  | -4.4299984 |
| PEX12   | -1.7957115 |
| PEX13   | -1.9633355 |
| PEX14   | -2.4894607 |
| PEX16   | -4.278851  |
| PEX19   | -3.3553066 |
| PEX2    | -2.0331779 |
| PEX26   | -2.6365952 |
| PEX3    | -2.2310996 |
| PEX5    | -2.693563  |
| PEX6    | -2.2886977 |
| PEX7    | -3.2205706 |
| PFDN1   | -0.8333683 |
| PFKFB1  | -5.5865774 |
| PFKL    | -1.8210478 |
| PFKM    | -1.681356  |
| PFPL    | -1.8206482 |
| PGA5    | -2.4341388 |
| PGAM1   | -1.8054929 |
| PGAM5   | -0.6527333 |
| PGAP2   | -0.7246733 |
| PGC     | -1.0404725 |
| PGD     | -0.8696303 |
| PGK1    | -2.3940387 |
| PGLS    | -1.9073777 |
| PGLYRP2 | -6.369748  |
| PGLYRP3 | -2.0044653 |
| PGLYRP4 | -1.9134879 |
| PGM2    | -4.4406567 |
| PGM3    | -1.2874503 |
| PGP     | -0.8089304 |
| PGPEP1  | -3.8163419 |
| PGR     | -1.5658815 |
| PGR15L  | -2.044925  |
| PGRMC1  | -3.390749  |



|          |            |
|----------|------------|
| PGRMC2   | -0.866663  |
| PHACTR3  | -1.2520275 |
| PHACTR4  | -0.252945  |
| PHB      | -2.386992  |
| PHB2     | -2.5881915 |
| PHF10    | -0.3324866 |
| PHF14    | -0.2493539 |
| PHF5A    | -1.2106442 |
| PHF7     | -2.278627  |
| PHKA2    | -2.0423908 |
| PHKG2    | -0.8695741 |
| PHLDA2   | -2.4806242 |
| PHLDB3   | -1.7318926 |
| PHLPP1   | -1.4392295 |
| PHOSPHO2 | -1.1305137 |
| PHOX2A   | -0.3332913 |
| PHOX2B   | -1.4325898 |
| PHPT1    | -1.2749004 |
| PHYH     | -5.3885236 |
| PHYHD1   | -0.8703661 |
| PHYHIPL  | -2.161645  |
| PHYKPL   | -2.1034214 |
| PI4K2A   | -1.506854  |
| PI4KB    | -0.4752111 |
| PIANP    | -0.1864233 |
| PIAS2    | -1.4002371 |
| PIAS4    | -1.120574  |
| PICK1    | -1.6661475 |
| PID1     | -1.8040466 |
| PIDD1    | -1.287251  |
| PIGF     | -1.3435321 |
| PIGK     | -1.5227485 |
| PIGL     | -0.6724131 |
| PIGO     | -1.7861838 |
| PIGP     | -1.0389585 |
| PIGQ     | -0.7653995 |
| PIGS     | -0.7580757 |
| PIGT     | -1.448895  |
| PIGU     | -0.985209  |
| PIGV     | -0.2715392 |
| PIGX     | -0.9729905 |
| PIGYL    | -1.8806977 |
| PIGZ     | -1.4347908 |
| PIH1D1   | -1.42767   |
| PIH1D3   | -1.6698234 |

|            |            |
|------------|------------|
| PIK3C2G    | -4.096368  |
| PIK3R2     | -1.762145  |
| PIK3R4     | -0.3690496 |
| PIKFYVE    | -0.4551611 |
| PIN1       | -1.0025616 |
| PIN1RT1    | -0.9062519 |
| PIN4       | -0.3470049 |
| PINC       | -2.2149699 |
| PINK1      | -2.5215092 |
| PINLYP     | -1.7891381 |
| PIP4K2B    | -0.5665298 |
| PIP5K1B    | -2.0225024 |
| PIP5K1BOS  | -2.2242548 |
| PIP5KL1    | -0.8361352 |
| PIPOX      | -11.32567  |
| PIR        | -1.8028688 |
| PIRB       | -0.43468   |
| PIRT       | -2.0784318 |
| PISD       | -0.8215957 |
| PISD-PS1   | -0.3417845 |
| PISD-PS2   | -1.200849  |
| PITHD1     | -0.8039985 |
| PITPNB     | -1.3038521 |
| PITPNM2    | -0.6878991 |
| PITPNM2OS1 | -1.3875463 |
| PITRM1     | -0.9138136 |
| PITX1      | -1.3592288 |
| PITX3      | -0.7836037 |
| PIWIL1     | -2.2320058 |
| PJA1       | -1.4099708 |
| PKD2L1     | -2.3064828 |
| PKDCC      | -2.5066147 |
| PKDREJ     | -1.710279  |
| PKHD1      | -1.0833311 |
| PKHD1L1    | -0.5219154 |
| PKLR       | -7.5352883 |
| PKP1       | -4.9455013 |
| PKP2       | -1.3881874 |
| PKP3       | -1.3367519 |
| PKP4       | -0.4050674 |
| PLA1A      | -3.041954  |
| PLA2G12A   | -1.2619553 |
| PLA2G12B   | -9.31297   |
| PLA2G15    | -1.6780663 |
| PLA2G16    | -1.0835533 |

|           |            |
|-----------|------------|
| PLA2G2D   | -2.1535227 |
| PLA2G4B   | -0.4744625 |
| PLA2G4D   | -2.1487207 |
| PLA2G6    | -2.8163972 |
| PLAA      | -0.5984993 |
| PLAC1     | -2.162814  |
| PLAC8L1   | -2.1689956 |
| PLAG1     | -0.5164545 |
| PLBD1     | -0.6773357 |
| PLBD2     | -1.9783916 |
| PLCL2     | -0.7854052 |
| PLCXD1    | -1.437165  |
| PLCXD2    | -4.718568  |
| PLCZ1     | -1.9550619 |
| PLD4      | -1.3060489 |
| PLD6      | -2.6677108 |
| PLEK2     | -2.675691  |
| PLEKHA5   | -0.6311159 |
| PLEKHA6   | -3.798821  |
| PLEKHA7   | -1.3281019 |
| PLEKHA8   | -2.128696  |
| PLEKHD10S | -1.252986  |
| PLEKHF1   | -0.6337276 |
| PLEKHG1   | -2.471197  |
| PLEKHG3   | -1.8413105 |
| PLEKHG6   | -3.3524332 |
| PLEKHH2   | -0.9347391 |
| PLEKHH3   | -0.8906241 |
| PLEKHJ1   | -1.1490877 |
| PLEKHN1   | -1.1181121 |
| PLG       | -12.774703 |
| PLIN2     | -2.4498534 |
| PLIN3     | -1.0864592 |
| PLIN5     | -5.30048   |
| PLK1      | -0.7646694 |
| PLK3      | -1.0121956 |
| PLK5      | -1.348274  |
| PLLP      | -1.9020381 |
| PLSCR2    | -0.7229652 |
| PLSCR5    | -2.1481514 |
| PLTP      | -0.8516994 |
| PLXNB1    | -1.498436  |
| PLXNB2    | -1.2364206 |
| PLXNB3    | -0.6634903 |
| PLXNC1    | -1.1912422 |

|          |            |
|----------|------------|
| PM20D1   | -6.1883655 |
| PM20D2   | -0.6779432 |
| PMCH     | -2.2792428 |
| PMEL     | -2.0439265 |
| PMF1     | -1.3242321 |
| PMFBP1   | -2.14665   |
| PMIS2    | -1.6971917 |
| PMM2     | -2.160253  |
| PMP2     | -2.152357  |
| PMPCA    | -1.6304741 |
| PMPCB    | -2.129642  |
| PMS1     | -1.1130698 |
| PMVK     | -1.555923  |
| PNKD     | -2.4362416 |
| PNKP     | -0.2850785 |
| PNLDC1   | -2.1577957 |
| PNLIP    | -1.8885722 |
| PNLIPRP2 | -2.6784508 |
| PNMA1    | -1.5292773 |
| PNMA3    | -0.7874234 |
| PNMA5    | -1.9991047 |
| PNMT     | -2.5107067 |
| PN01     | -0.7927771 |
| PNOC     | -1.6855478 |
| PNP      | -1.067101  |
| PNP2     | -0.3525221 |
| PNPLA1   | -3.7234871 |
| PNPLA3   | -4.2994833 |
| PNPLA5   | -5.391627  |
| PNPLA6   | -0.8334727 |
| PNPLA7   | -4.683184  |
| PNPO     | -3.5987082 |
| PNPT1    | -0.9659972 |
| PNRC1    | -0.2576871 |
| POFUT1   | -0.5526304 |
| POGLUT1  | -0.6637254 |
| POGZ     | -0.4208345 |
| POLA1    | -0.4788404 |
| POLD1    | -0.2400351 |
| POLD2    | -1.344974  |
| POLD4    | -1.7535763 |
| POLDIP2  | -2.7509818 |
| POLE     | -1.1972377 |
| POLE3    | -0.6291051 |
| POLE4    | -1.4503088 |

|          |            |
|----------|------------|
| POLG     | -1.107472  |
| POLG2    | -2.1641881 |
| POLI     | -0.3723435 |
| POLL     | -1.5031657 |
| POLN     | -0.5246069 |
| POLR1A   | -0.9347267 |
| POLR1B   | -1.0763352 |
| POLR1C   | -0.34268   |
| POLR1D   | -0.6216707 |
| POLR1E   | -0.2118497 |
| POLR2B   | -0.8121848 |
| POLR2C   | -0.2166734 |
| POLR2D   | -0.2878852 |
| POLR2E   | -0.9694867 |
| POLR2F   | -1.0807462 |
| POLR2G   | -0.8732247 |
| POLR2H   | -1.1429834 |
| POLR2I   | -1.4940748 |
| POLR2J   | -1.1859684 |
| POLR2K   | -0.506978  |
| POLR2L   | -1.7730002 |
| POLR2M   | -0.4226594 |
| POLR3A   | -1.4629993 |
| POLR3B   | -0.6035967 |
| POLR3C   | -1.4542408 |
| POLR3D   | -0.4333673 |
| POLR3G   | -2.4910707 |
| POLR3H   | -1.8108006 |
| POLR3K   | -0.3178353 |
| POLRMT   | -1.604023  |
| POM121L2 | -1.5484917 |
| POMC     | -0.5278995 |
| POMGNT2  | -1.215261  |
| POMK     | -1.889894  |
| POMP     | -1.0896907 |
| POMT1    | -2.401299  |
| POMT2    | -1.9694304 |
| PON1     | -4.6213217 |
| PON3     | -1.0646391 |
| POP1     | -0.3808265 |
| POP5     | -1.7324457 |
| POP7     | -0.4775772 |
| POR      | -2.0692878 |
| POT1A    | -1.5935473 |
| POTEG    | -2.5223076 |

|          |            |
|----------|------------|
| POU1F1   | -1.8781145 |
| POU3F2   | -2.172804  |
| POU3F3OS | -2.011157  |
| POU3F4   | -2.0494168 |
| POU4F2   | -2.1001072 |
| POU4F3   | -2.3878288 |
| POU6F1   | -0.5114617 |
| PP2D1    | -0.2305641 |
| PPA1     | -3.1706662 |
| PPA2     | -2.3293552 |
| PPAP2B   | -1.7158852 |
| PPAP2C   | -2.223267  |
| PPAPDC1A | -0.9660325 |
| PPAPDC1B | -1.3625989 |
| PPAPDC3  | -0.7859585 |
| PPARA    | -4.5568657 |
| PPARG    | -0.5456281 |
| PPARGC1A | -2.2286692 |
| PPARGC1B | -3.1269834 |
| PPAT     | -0.937582  |
| PPCS     | -2.7790356 |
| PPDPF    | -2.1433578 |
| PPFIA2   | -0.9831452 |
| PPFIA3   | -0.8523159 |
| PPFIA4   | -0.8618407 |
| PPFIBP2  | -0.3307362 |
| PPIA     | -0.5812612 |
| PPIB     | -2.2655826 |
| PPIE     | -1.213973  |
| PPIF     | -4.2909822 |
| PPIFOS   | -2.1268969 |
| PPIH     | -0.4285698 |
| PPIL1    | -1.051996  |
| PPIL2    | -1.0621443 |
| PPIL3    | -0.7974105 |
| PPIP5K2  | -0.8060565 |
| PPM1A    | -1.2995486 |
| PPM1B    | -0.9626293 |
| PPM1G    | -0.484056  |
| PPM1K    | -1.0724587 |
| PPM1L    | -0.7174397 |
| PPME1    | -1.0850654 |
| PPNR     | -0.2627568 |
| PPOX     | -1.8369703 |
| PPP1CA   | -1.0518909 |

|            |            |
|------------|------------|
| PPP1CB     | -0.335022  |
| PPP1R11    | -0.9673843 |
| PPP1R14B   | -0.6696739 |
| PPP1R14C   | -0.5184903 |
| PPP1R16A   | -0.9489622 |
| PPP1R17    | -2.2421405 |
| PPP1R1B    | -1.4747887 |
| PPP1R1C    | -1.571775  |
| PPP1R2-PS7 | -2.0500014 |
| PPP1R2-PS9 | -2.1097555 |
| PPP1R35    | -1.3447747 |
| PPP1R37    | -2.0149584 |
| PPP1R3B    | -2.849772  |
| PPP1R3C    | -4.348772  |
| PPP1R3E    | -1.8205736 |
| PPP1R3FOS  | -1.2996423 |
| PPP1R3G    | -8.378307  |
| PPP1R7     | -0.8568339 |
| PPP2R1A    | -0.8694239 |
| PPP2R2COS  | -2.1434703 |
| PPP2R2D    | -0.3349266 |
| PPP2R3A    | -0.1947069 |
| PPP2R3C    | -1.1009755 |
| PPP2R4     | -2.570737  |
| PPP2R5A    | -1.1055617 |
| PPP2R5D    | -0.7104535 |
| PPP2R5E    | -0.682339  |
| PPP4R4     | -1.2563176 |
| PPP5C      | -0.7299347 |
| PPP6C      | -0.3444276 |
| PPP6R2     | -0.4929149 |
| PPT2       | -2.0505142 |
| PPTC7      | -0.2685914 |
| PQBP1      | -1.1590486 |
| PQLC1      | -2.0977745 |
| PQLC2      | -3.4769578 |
| PRADC1     | -1.6278133 |
| PRAME      | -2.630466  |
| PRAMEF12O  | -2.1309988 |
| PRAMEF17   | -2.0316408 |
| PRAMEL     | -1.748908  |
| PRAMEL1    | -2.2825646 |
| PRAMEL4    | -3.4418838 |
| PRAMEL5    | -2.0430758 |
| PRAMEL6    | -2.1347775 |

|           |            |
|-----------|------------|
| PRAP1     | -0.9756255 |
| PRC1      | -0.5548949 |
| PRDM12    | -2.0474825 |
| PRDM14    | -1.5643106 |
| PRDM9     | -1.1622589 |
| PRDX1     | -2.1210318 |
| PRDX2     | -1.8101506 |
| PRDX3     | -2.2835426 |
| PRDX4     | -3.196939  |
| PRDX5     | -0.4035111 |
| PRDX6B    | -3.4559686 |
| PREB      | -1.0853825 |
| PRELID1   | -1.4068737 |
| PRELID2   | -2.3695402 |
| PREP      | -0.2757559 |
| PREPL     | -1.3916011 |
| PRG2      | -2.6932683 |
| PRG3      | -2.4989202 |
| PRG4      | -5.310343  |
| PRH1      | -1.9396708 |
| PRICKLE4  | -2.4311414 |
| PRIM1     | -0.477448  |
| PRIMA1    | -2.4521596 |
| PRKAA2    | -2.7819867 |
| PRKAB1    | -0.7099752 |
| PRKACA    | -0.824291  |
| PRKACB    | -0.1475844 |
| PRKAG1    | -1.4920135 |
| PRKAG2    | -1.9199052 |
| PRKAG2OS1 | -2.1652174 |
| PRKAG3    | -0.7109463 |
| PRKAR1A   | -1.2061496 |
| PRKAR2A   | -1.9100847 |
| PRKCSH    | -1.5386977 |
| PRKCZ     | -0.4024439 |
| PRKRA     | -1.452683  |
| PRKRIR    | -1.0159354 |
| PRL       | -2.1914315 |
| PRL2A1    | -2.1753798 |
| PRL2B1    | -1.7617054 |
| PRL2C5    | -6.615308  |
| PRL3A1    | -2.0051444 |
| PRL3C1    | -2.2053962 |
| PRL4A1    | -2.4064693 |
| PRL5A1    | -2.3685336 |



|         |            |
|---------|------------|
| PRL6A1  | -1.9018836 |
| PRL7A2  | -1.9773376 |
| PRL7B1  | -2.201193  |
| PRL7C1  | -4.091339  |
| PRL7D1  | -2.246572  |
| PRL8A1  | -2.1465023 |
| PRL8A2  | -1.9828634 |
| PRL8A6  | -2.2044547 |
| PRL8A9  | -2.0919805 |
| PRLR    | -7.397389  |
| PRM3    | -1.8294506 |
| PRMT10  | -0.87988   |
| PRMT3   | -0.76999   |
| PRMT5   | -0.1821919 |
| PRMT7   | -0.6943841 |
| PRN     | -1.8052287 |
| PROB1   | -0.7701893 |
| PROC    | -11.029358 |
| PROCA1  | -0.351373  |
| PROCR   | -0.7870545 |
| PRODH   | -4.8691893 |
| PRODH2  | -12.035009 |
| PROK1   | -3.5968695 |
| PROKR2  | -2.0838938 |
| PROL1   | -2.1482964 |
| PROM1   | -0.858624  |
| PROM2   | -2.7782605 |
| PRORS1  | -0.529881  |
| PROS1   | -0.5252123 |
| PROSC   | -1.4552617 |
| PROSER1 | -0.5446436 |
| PROSER2 | -2.4688902 |
| PROX1   | -5.4690313 |
| PROZ    | -6.3179073 |
| PRP2    | -1.2824903 |
| PRPF19  | -2.2261753 |
| PRPF40B | -0.7347684 |
| PRPF8   | -0.6751413 |
| PRPH2   | -2.087297  |
| PRPMP5  | -1.3151746 |
| PRPS1   | -0.8252778 |
| PRPS1L1 | -1.7721305 |
| PRPS1L3 | -0.9799829 |
| PRPSAP1 | -1.4680176 |
| PRR12   | -1.3194883 |

|        |            |
|--------|------------|
| PRR16  | -3.8482828 |
| PRR19  | -1.4821148 |
| PRR22  | -0.9251297 |
| PRR23A | -2.3535101 |
| PRR27  | -2.8943465 |
| PRR3   | -0.278677  |
| PRR30  | -1.6993577 |
| PRR32  | -2.2595062 |
| PRR5   | -1.3506413 |
| PRRC2A | -0.8015866 |
| PRRG2  | -1.8000007 |
| PRRT2  | -0.9794726 |
| PRRXL1 | -1.9987984 |
| PRSS1  | -1.0594814 |
| PRSS21 | -2.2520323 |
| PRSS27 | -1.2630012 |
| PRSS29 | -2.851798  |
| PRSS30 | -1.4415932 |
| PRSS32 | -1.6153948 |
| PRSS35 | -2.0865426 |
| PRSS36 | -1.4493    |
| PRSS37 | -0.5248332 |
| PRSS38 | -1.9856458 |
| PRSS39 | -2.1822293 |
| PRSS40 | -1.7817097 |
| PRSS41 | -1.5380397 |
| PRSS42 | -1.4265347 |
| PRSS43 | -1.9923525 |
| PRSS44 | -2.0061872 |
| PRSS45 | -2.3048632 |
| PRSS46 | -3.493894  |
| PRSS47 | -2.1535466 |
| PRSS51 | -1.4250038 |
| PRSS52 | -2.1039305 |
| PRSS55 | -2.1948695 |
| PRSS57 | -2.2428498 |
| PRSS58 | -1.6867936 |
| PRTG   | -2.1708453 |
| PRTN3  | -2.527466  |
| PRUNE  | -1.6021283 |
| PSAP   | -1.6829638 |
| PSD3   | -0.8242011 |
| PSEN1  | -0.2504816 |
| PSEN2  | -2.0038743 |
| PSENE  | -0.6992064 |

|         |            |
|---------|------------|
| PSG17   | -1.5423472 |
| PSG18   | -1.4344187 |
| PSG19   | -1.607671  |
| PSG20   | -2.5009632 |
| PSG21   | -2.2809083 |
| PSG22   | -2.129293  |
| PSG23   | -4.5353093 |
| PSG25   | -2.371885  |
| PSG26   | -2.163249  |
| PSG28   | -2.3204942 |
| PSG29   | -2.0680368 |
| PSG-PS1 | -2.1215587 |
| PSKH1   | -1.7430515 |
| PSMA1   | -0.636961  |
| PSMA2   | -0.4288397 |
| PSMA3   | -0.9029985 |
| PSMA4   | -1.0229125 |
| PSMA5   | -1.4525204 |
| PSMA6   | -0.8607369 |
| PSMA7   | -1.0830069 |
| PSMB1   | -1.6121945 |
| PSMB10  | -0.4903097 |
| PSMB11  | -1.8083651 |
| PSMB3   | -1.2817912 |
| PSMB4   | -1.3022456 |
| PSMB5   | -1.262547  |
| PSMB6   | -1.5231109 |
| PSMB7   | -2.4519238 |
| PSMB8   | -0.7981367 |
| PSMB9   | -1.000051  |
| PSMC1   | -1.1465158 |
| PSMC2   | -0.8040404 |
| PSMC3   | -1.0748687 |
| PSMC4   | -1.3604212 |
| PSMC5   | -0.5365515 |
| PSMC6   | -0.6602597 |
| PSMD1   | -0.7892127 |
| PSMD11  | -1.704854  |
| PSMD12  | -0.8047195 |
| PSMD13  | -1.6369133 |
| PSMD2   | -0.6625481 |
| PSMD3   | -1.4486265 |
| PSMD4   | -0.9592757 |
| PSMD5   | -1.2644181 |
| PSMD6   | -0.9580188 |

|         |            |
|---------|------------|
| PSMD7   | -0.7580509 |
| PSMD9   | -2.513556  |
| PSME1   | -1.0818195 |
| PSME2B  | -0.4746103 |
| PSME3   | -1.9823661 |
| PSMF1   | -1.3248382 |
| PSMG1   | -2.0391135 |
| PSMG2   | -0.7283878 |
| PSMG3   | -1.510098  |
| PSMG4   | -1.1131082 |
| PSPH    | -1.0993476 |
| PSPN    | -2.1236033 |
| PSRC1   | -1.4830568 |
| PSTK    | -1.9833455 |
| PTBP1   | -0.5757337 |
| PTCD1   | -1.1793461 |
| PTCD2   | -2.2760954 |
| PTCD3   | -1.3319907 |
| PTCH1   | -0.3687656 |
| PTCH2   | -1.0290852 |
| PTCHD1  | -1.9654665 |
| PTCHD2  | -0.6155562 |
| PTDSS1  | -0.9157896 |
| PTDSS2  | -0.7344503 |
| PTER    | -6.208015  |
| PTF1A   | -2.3172972 |
| PTGDR   | -1.9817731 |
| PTGDR2  | -0.2938643 |
| PTGDS   | -2.3992755 |
| PTGES   | -1.3254862 |
| PTGES2  | -1.4055071 |
| PTGES3  | -0.523943  |
| PTGR1   | -0.3627276 |
| PTGR2   | -1.8155265 |
| PTGS1   | -1.32722   |
| PTH     | -2.0356345 |
| PTH1R   | -3.657503  |
| PTH2R   | -2.3013406 |
| PTK2B   | -0.8162031 |
| PTK6    | -2.2351234 |
| PTMS    | -1.8007998 |
| PTOV1   | -1.003345  |
| PTP4A1  | -1.0942378 |
| PTPLA   | -1.2074618 |
| PTPLAD1 | -2.5545344 |

|         |            |
|---------|------------|
| PTPLB   | -2.278985  |
| PTPMT1  | -2.1289916 |
| PTPN20  | -1.8458104 |
| PTPN3   | -1.1506095 |
| PTPN5   | -0.776648  |
| PTPN9   | -0.5062208 |
| PTPRD   | -1.9496608 |
| PTPRF   | -0.6639671 |
| PTPRH   | -1.6332316 |
| PTPRN   | -0.8956492 |
| PTPRN2  | -0.9340429 |
| PTPRQ   | -3.2447126 |
| PTPRR   | -2.3211362 |
| PTRH2   | -1.4676175 |
| PTRHD1  | -1.6221447 |
| PTS     | -2.4124413 |
| PTTG1   | -0.3544974 |
| PTTG1IP | -1.1430593 |
| PTX4    | -1.079068  |
| PUF60   | -0.6388249 |
| PUS1    | -1.4917817 |
| PUS10   | -1.7961364 |
| PUSL1   | -0.7707186 |
| PVALB   | -1.7724097 |
| PVRL1   | -1.6815434 |
| PVRL2   | -0.8016605 |
| PWP2    | -0.8127375 |
| PXMP2   | -6.0663753 |
| PXMP4   | -3.8011174 |
| PXYLP1  | -1.8885844 |
| PYCRL   | -3.0350888 |
| PYDC3   | -1.331182  |
| PYGL    | -1.9025254 |
| PYGO1   | -2.0979953 |
| PYROXD2 | -4.7724147 |
| PYURF   | -3.2840219 |
| PZP     | -9.952791  |
| QARS    | -0.8117142 |
| QDPR    | -4.992229  |
| QPCT    | -2.1276255 |
| QPCTL   | -1.4703269 |
| QPRT    | -7.670636  |
| QRFPR   | -1.6586266 |
| QRSL1   | -0.6701713 |
| QSOX1   | -2.1265192 |

|             |            |
|-------------|------------|
| QSOX2       | -0.2595179 |
| QTRT1       | -0.7925181 |
| R3HCC1      | -1.3277788 |
| R3HDM2      | -0.4932199 |
| RAB1        | -0.4590826 |
| RAB11A      | -0.3358131 |
| RAB11B      | -0.802928  |
| RAB11FIP2   | -0.6020956 |
| RAB11FIP4   | -1.6079266 |
| RAB11FIP4O5 | -1.471585  |
| RAB13       | -0.4175272 |
| RAB14       | -0.6205058 |
| RAB17       | -5.981173  |
| RAB18       | -0.4051037 |
| RAB1B       | -1.271738  |
| RAB21       | -0.5466952 |
| RAB22A      | -0.5996079 |
| RAB23       | -0.6335409 |
| RAB24       | -1.3268313 |
| RAB30       | -4.6659555 |
| RAB32       | -0.3028126 |
| RAB39       | -1.9997005 |
| RAB39B      | -2.338372  |
| RAB3A       | -0.1543365 |
| RAB3B       | -2.4879994 |
| RAB3D       | -0.5846267 |
| RAB3IL1     | -1.1982927 |
| RAB3IP      | -0.3651061 |
| RAB40B      | -0.7816799 |
| RAB40C      | -1.0394983 |
| RAB42       | -2.1041536 |
| RAB43       | -1.305356  |
| RAB4A       | -3.6489882 |
| RAB4B       | -0.7892647 |
| RAB5B       | -0.4067707 |
| RAB5C       | -0.7442813 |
| RAB7L1      | -1.298696  |
| RAB8A       | -0.929318  |
| RAB9        | -1.5036831 |
| RAB9B       | -0.6928537 |
| RABEP1      | -0.4730964 |
| RABEPK      | -1.1562388 |
| RABGGTA     | -2.2349577 |
| RABGGTB     | -0.8035793 |
| RABIF       | -0.3050056 |

|          |            |
|----------|------------|
| RABL3    | -2.4239767 |
| RABL6    | -0.289012  |
| RAC1     | -0.2420163 |
| RAD1     | -0.6147981 |
| RAD21L   | -2.5010135 |
| RAD23A   | -0.9931877 |
| RAD23B   | -0.6237226 |
| RAD51    | -0.5524094 |
| RAD51AP1 | -0.6458564 |
| RAD51AP2 | -1.83758   |
| RAD51B   | -5.6207833 |
| RAD51C   | -1.8428559 |
| RAD51D   | -1.4932687 |
| RAD54B   | -0.3916767 |
| RAD54L   | -0.2372792 |
| RAD54L2  | -1.3403144 |
| RAET1A   | -4.752951  |
| RAET1B   | -2.845399  |
| RAET1C   | -0.7076252 |
| RAET1E   | -2.9439764 |
| RAF1     | -0.9040489 |
| RAG1     | -2.0153618 |
| RAG2     | -1.6888399 |
| RALGPS1  | -1.9248013 |
| RALGPS2  | -2.6918805 |
| RALY     | -0.6594338 |
| RALYL    | -1.7437224 |
| RAMP1    | -0.5140238 |
| RAN      | -0.3774176 |
| RANBP1   | -0.5417981 |
| RANBP10  | -1.8749433 |
| RANBP17  | -2.047823  |
| RANBP3   | -0.1821837 |
| RANBP3L  | -2.2407417 |
| RANBP6   | -0.3497484 |
| RANGAP1  | -0.3007426 |
| RANGRF   | -0.5123291 |
| RAP2C    | -1.7975597 |
| RAPGEF4  | -3.013993  |
| RAPH1    | -1.5389123 |
| RARB     | -2.231518  |
| RARRES1  | -7.164051  |
| RARRES2  | -2.664731  |
| RARS2    | -0.9584107 |
| RASA4    | -0.4062352 |

|         |            |
|---------|------------|
| RASAL1  | -4.003209  |
| RASGRF2 | -1.0482199 |
| RASGRP2 | -1.3504453 |
| RASL2-9 | -0.8177977 |
| RASSF3  | -0.4619718 |
| RASSF4  | -0.6370201 |
| RASSF6  | -2.5001528 |
| RASSF7  | -0.9351144 |
| RAVER1  | -2.047172  |
| RBBP5   | -0.7408314 |
| RBBP7   | -0.9667559 |
| RBBP9   | -0.7716422 |
| RBCK1   | -1.083756  |
| RBFA    | -2.6822743 |
| RBFOX2  | -0.6219592 |
| RBFOX3  | -1.3777237 |
| RBKS    | -2.6281834 |
| RBL2    | -0.9316273 |
| RBM11   | -1.9791551 |
| RBM12B1 | -0.86321   |
| RBM15   | -0.3136272 |
| RBM19   | -0.2365651 |
| RBM3    | -0.3554201 |
| RBM34   | -1.1231298 |
| RBM4    | -1.0071206 |
| RBM42   | -0.2169814 |
| RBM44   | -2.2541037 |
| RBM45   | -0.3824458 |
| RBM47   | -0.4130168 |
| RBM4B   | -0.9588871 |
| RBMXL2  | -2.333613  |
| RBMX    | -3.5760438 |
| RBP1    | -3.6097493 |
| RBP2    | -0.9058447 |
| RBP3    | -0.7173452 |
| RBP4    | -6.137878  |
| RPMS2   | -4.924375  |
| RCAN2   | -1.3755951 |
| RCAN3   | -0.3656812 |
| RCBTB1  | -1.80368   |
| RCBTB2  | -1.8561835 |
| RCC2    | -0.2948194 |
| RCHY1   | -0.3293815 |
| RCL1    | -3.8772244 |
| RCVRN   | -1.0425594 |



|          |            |
|----------|------------|
| RD3L     | -2.0776901 |
| RDH1     | -0.540278  |
| RDH10    | -1.0782604 |
| RDH11    | -2.4641976 |
| RDH13    | -0.9013252 |
| RDH14    | -1.9111767 |
| RDH16    | -9.677496  |
| RDH18-PS | -3.5792055 |
| RDH5     | -4.5043626 |
| RDH7     | -13.957432 |
| RDH8     | -2.201278  |
| RDH9     | -7.3969707 |
| RDM1     | -0.5480504 |
| RDX      | -0.4812245 |
| REC114   | -3.3270886 |
| RECQL4   | -1.574532  |
| RECQL5   | -1.4273095 |
| REDRUM   | -0.9550972 |
| REEP2    | -1.3285058 |
| REEP3    | -0.9802241 |
| REEP4    | -0.451119  |
| REEP6    | -5.2694883 |
| REG1     | -2.0797591 |
| REG2     | -1.8053567 |
| REG3B    | -2.0849054 |
| REG3D    | -1.5153499 |
| REL      | -2.0337849 |
| RELL2    | -1.1115608 |
| RELN     | -3.614859  |
| REM2     | -1.4918408 |
| REN1     | -1.982369  |
| REN2     | -4.309502  |
| REPIN1   | -2.5850239 |
| REPS2    | -0.5742269 |
| RER1     | -1.5871425 |
| RETSAT   | -5.493455  |
| REX2     | -2.404245  |
| REXO2    | -0.7164817 |
| RFC1     | -0.2457161 |
| RFC2     | -1.7252059 |
| RFC3     | -1.2164443 |
| RFC5     | -1.6813865 |
| RFESD    | -0.9825988 |
| RFFL     | -0.7661514 |
| RFK      | -0.5323224 |

|         |            |
|---------|------------|
| RFNG    | -0.6110234 |
| RFPL4   | -0.5436649 |
| RFPL4B  | -2.0694842 |
| RFT1    | -1.0747046 |
| RFWD2   | -0.593246  |
| RFWD3   | -0.5669265 |
| RFX4    | -2.037323  |
| RFX6    | -2.016399  |
| RFX7    | -1.7939546 |
| RFXANK  | -1.6947293 |
| RFXAP   | -0.9158187 |
| RGL1    | -0.2374477 |
| RGL3    | -2.1476665 |
| RGN     | -12.030905 |
| RGS16   | -2.5718231 |
| RGS20   | -1.4995008 |
| RGS5    | -2.9291105 |
| RGS7    | -0.9742134 |
| RGSL1   | -0.8971753 |
| RHBDD1  | -1.2869906 |
| RHBDD2  | -0.6848671 |
| RHBDD3  | -2.6678796 |
| RHBDL1  | -1.7076669 |
| RHBDL2  | -2.0803342 |
| RHBG    | -4.551999  |
| RHO     | -2.0737844 |
| RHOBTB1 | -1.9191902 |
| RHOBTB2 | -0.4482708 |
| RHOBTB3 | -1.7196021 |
| RHOD    | -3.6491358 |
| RHOH    | -1.3003902 |
| RHOT1   | -0.6156058 |
| RHOT2   | -1.7887731 |
| RHOU    | -1.5618148 |
| RHOX10  | -2.7149105 |
| RHOX11  | -2.2636302 |
| RHOX12  | -2.1788402 |
| RHOX2C  | -1.8252206 |
| RHOX2F  | -2.494295  |
| RHOX3A  | -1.2204773 |
| RHOX3F  | -0.9220905 |
| RHOX3G  | -1.7671962 |
| RHOX3H  | -0.4138179 |
| RHOX4A  | -1.7738371 |
| RHOX4E  | -1.88977   |

|          |            |
|----------|------------|
| RHOX5    | -3.4225497 |
| RHOX6    | -2.1673934 |
| RHPN2    | -1.9097443 |
| RIC3     | -0.9481959 |
| RILP     | -2.940086  |
| RILPL2   | -0.2376695 |
| RIMBP2   | -2.0646684 |
| RIMKLB   | -2.1421247 |
| RIMS2    | -1.3721461 |
| RIMS3    | -2.3394842 |
| RIMS4    | -5.710983  |
| RING1    | -1.397639  |
| RINT1    | -0.9349415 |
| RIOK2    | -0.4941759 |
| RIOK3    | -0.5051637 |
| RIPPLY1  | -1.9029493 |
| RIT1     | -0.3778009 |
| RITA1    | -0.820555  |
| RLBP1    | -1.4790165 |
| RMDN1    | -3.210854  |
| RMDN2    | -1.4201145 |
| RMDN3    | -1.8039856 |
| RMI1     | -0.4353395 |
| RMI2     | -2.0516167 |
| RMND1    | -2.9433293 |
| RMND5A   | -1.2355542 |
| RMND5B   | -1.1689558 |
| RN28S1   | -0.7883048 |
| RN45S    | -0.9783816 |
| RNASE1   | -2.2283852 |
| RNASE11  | -3.6725142 |
| RNASE12  | -0.6942627 |
| RNASE2B  | -1.9298713 |
| RNASE4   | -3.4073048 |
| RNASE9   | -1.1559744 |
| RNASEH1  | -0.4918814 |
| RNASEH2A | -1.887846  |
| RNASEH2B | -1.1229377 |
| RNASEH2C | -1.4608893 |
| RNASEK   | -1.177351  |
| RNASET2A | -1.1712246 |
| RND2     | -4.1960654 |
| RNF10    | -1.200829  |
| RNF103   | -2.2844195 |
| RNF112   | -0.7013824 |

|           |            |
|-----------|------------|
| RNF113A1  | -0.4748492 |
| RNF113A2  | -0.31778   |
| RNF115    | -0.2743645 |
| RNF121    | -0.81563   |
| RNF123    | -3.0140114 |
| RNF125    | -1.8417177 |
| RNF126    | -0.9164772 |
| RNF128    | -4.855004  |
| RNF13     | -1.2332864 |
| RNF130    | -0.1865444 |
| RNF135    | -1.5727811 |
| RNF138    | -0.3257942 |
| RNF138RT1 | -4.7112956 |
| RNF139    | -1.1594577 |
| RNF14     | -0.8105593 |
| RNF141    | -0.6232171 |
| RNF144B   | -0.8893502 |
| RNF145    | -0.3874826 |
| RNF148    | -2.201003  |
| RNF149    | -1.0339432 |
| RNF151    | -1.087143  |
| RNF152    | -4.6375093 |
| RNF165    | -0.8639638 |
| RNF167    | -0.9264684 |
| RNF169    | -0.4882021 |
| RNF17     | -2.193532  |
| RNF170    | -1.8708134 |
| RNF181    | -1.3097491 |
| RNF182    | -2.000401  |
| RNF183    | -1.9379158 |
| RNF185    | -1.2177453 |
| RNF186    | -0.4945183 |
| RNF187    | -0.7898173 |
| RNF212    | -1.215303  |
| RNF217    | -1.6041601 |
| RNF222    | -3.6167996 |
| RNF224    | -2.20039   |
| RNF26     | -0.886395  |
| RNF4      | -1.0950456 |
| RNF40     | -0.3830705 |
| RNF43     | -2.7168632 |
| RNF5      | -2.3028054 |
| RNF7      | -0.4096556 |
| RNFT1     | -1.1963134 |
| RNH1      | -1.2288613 |

|         |            |
|---------|------------|
| RNMTL1  | -2.0586038 |
| RNPEP   | -0.39048   |
| RNPEPL1 | -0.9502602 |
| RNPS1   | -0.3597865 |
| RNU3B1  | -2.3425012 |
| ROBO3   | -2.4647932 |
| ROGDI   | -1.856875  |
| ROM1    | -0.6386366 |
| ROMO1   | -1.8176184 |
| ROPN1   | -2.0507393 |
| ROPN1L  | -4.0945764 |
| RORA    | -0.6000924 |
| RORC    | -3.2077694 |
| ROS1    | -1.1802647 |
| RP1     | -1.8502483 |
| RP9     | -1.1320205 |
| RPA1    | -0.9138856 |
| RPA2    | -0.4923987 |
| RPA3    | -0.3762569 |
| RPAIN   | -0.4793181 |
| RPAP1   | -1.3389716 |
| RPAP2   | -1.5883603 |
| RPAP3   | -0.8963132 |
| RPE     | -1.0888762 |
| RPE65   | -1.8718009 |
| RPF1    | -0.3979507 |
| RPF2    | -0.4682674 |
| RPH3A   | -0.5169354 |
| RPL10   | -0.9604917 |
| RPL10A  | -0.7758269 |
| RPL11   | -0.8270288 |
| RPL12   | -0.8654599 |
| RPL13   | -0.4284535 |
| RPL13A  | -0.6378856 |
| RPL14   | -0.5163465 |
| RPL15   | -0.5035229 |
| RPL17   | -0.4443679 |
| RPL18A  | -0.6079183 |
| RPL19   | -0.8936529 |
| RPL22   | -0.254756  |
| RPL23   | -0.5638137 |
| RPL23A  | -0.6295023 |
| RPL24   | -0.7576656 |
| RPL26   | -0.3560386 |
| RPL27   | -0.6988511 |

|            |            |
|------------|------------|
| RPL27A     | -0.5758057 |
| RPL28      | -1.0209899 |
| RPL3       | -0.5071392 |
| RPL31      | -0.7808113 |
| RPL31-PS12 | -0.525775  |
| RPL32      | -0.4173622 |
| RPL34      | -0.3527641 |
| RPL34-PS1  | -0.5225802 |
| RPL35      | -0.5974231 |
| RPL35A     | -0.5402203 |
| RPL36      | -0.9644027 |
| RPL36A     | -0.5789619 |
| RPL36AL    | -1.2824011 |
| RPL37A     | -0.8488202 |
| RPL38      | -0.7944274 |
| RPL39      | -0.1611147 |
| RPL4       | -1.002768  |
| RPL41      | -1.1298175 |
| RPL5       | -0.4148231 |
| RPL5-PS2   | -0.2855797 |
| RPL6       | -0.582006  |
| RPL7       | -0.3571534 |
| RPL7A      | -0.6642213 |
| RPL7L1     | -1.7905803 |
| RPL8       | -0.5690002 |
| RPL9       | -0.4098792 |
| RPLP0      | -0.812757  |
| RPLP1      | -1.2280688 |
| RPLP2      | -0.5231862 |
| RPN1       | -0.9010143 |
| RPN2       | -0.8809648 |
| RPP21      | -1.0407038 |
| RPP25      | -1.4005473 |
| RPP25L     | -1.0006862 |
| RPP38      | -0.175067  |
| RPP40      | -1.808775  |
| RPS10      | -0.7652659 |
| RPS11      | -0.7357421 |
| RPS11-PS1  | -0.89852   |
| RPS12      | -0.5953546 |
| RPS12L2    | -0.3065958 |
| RPS12-PS16 | -0.5173221 |
| RPS13      | -0.4643202 |
| RPS14      | -0.8774228 |
| RPS15      | -0.7813582 |

|          |            |
|----------|------------|
| RPS15A   | -0.3095241 |
| RPS16    | -0.807384  |
| RPS17    | -0.8203306 |
| RPS18    | -0.7734623 |
| RPS19BP1 | -1.3297296 |
| RPS2     | -1.8708992 |
| RPS20    | -0.4891553 |
| RPS21    | -0.5231481 |
| RPS24    | -0.2943611 |
| RPS25    | -0.8171148 |
| RPS26    | -0.4462466 |
| RPS27    | -0.3597131 |
| RPS27A   | -0.5574393 |
| RPS27L   | -2.420054  |
| RPS28    | -0.6532912 |
| RPS29    | -0.6443334 |
| RPS3     | -0.8489513 |
| RPS3A1   | -0.3621903 |
| RPS4X    | -0.4943733 |
| RPS5     | -0.8928905 |
| RPS6     | -0.4467702 |
| RPS6KB2  | -0.8873992 |
| RPS7     | -0.429338  |
| RPS8     | -0.911715  |
| RPSA     | -1.0182428 |
| RPTOR    | -0.8800507 |
| RPUSD1   | -0.8522389 |
| RPUSD2   | -2.2553153 |
| RPUSD3   | -3.8667822 |
| RPUSD4   | -1.1206741 |
| RQCD1    | -1.1535153 |
| RRAGA    | -1.6440034 |
| RRAGC    | -0.5505252 |
| RRBP1    | -1.1846051 |
| RREB1    | -1.017077  |
| RRH      | -1.8546233 |
| RRM2     | -0.800242  |
| RRNAD1   | -0.2822914 |
| RRP15    | -0.6757917 |
| RRP36    | -1.2303033 |
| RRP8     | -0.9114595 |
| RRP9     | -0.5092769 |
| RRS1     | -0.2908464 |
| RSG1     | -1.8551974 |
| RSL1D1   | -0.893137  |

|          |            |
|----------|------------|
| RSLCAN18 | -0.8376901 |
| RSPH3B   | -0.5239005 |
| RSPH6A   | -1.9387631 |
| RSPO2    | -2.0759492 |
| RSPO3    | -5.1182013 |
| RSRC1    | -0.371707  |
| RSRP1    | -0.4248714 |
| RTBDN    | -0.8173635 |
| RTCA     | -0.401649  |
| RTCB     | -0.3297811 |
| RTTEL1   | -1.1282272 |
| RTFDC1   | -1.651082  |
| RTKN     | -0.3716259 |
| RTN3     | -0.7057896 |
| RTN4     | -1.1297121 |
| RTN4IP1  | -2.2293918 |
| RTN4R    | -2.0333314 |
| RTN4RL1  | -2.1459217 |
| RTN4RL2  | -1.4809914 |
| RTP1     | -1.9680235 |
| RTP2     | -1.9325607 |
| RTP3     | -3.4031978 |
| RUFY1    | -0.5895815 |
| RUFY3    | -1.3184748 |
| RUNDC3A  | -1.9846327 |
| RUSC2    | -1.0773444 |
| RUVBL1   | -0.5017653 |
| RWDD2A   | -1.031543  |
| RWDD2B   | -2.753951  |
| RWDD3    | -2.139207  |
| RXFP3    | -0.9561746 |
| RXRA     | -3.45376   |
| RXRB     | -0.6906824 |
| RXRG     | -2.296918  |
| RYK      | -0.6397643 |
| S100A1   | -1.7126493 |
| S100A10  | -0.6891661 |
| S100A13  | -0.8204446 |
| S100A7A  | -3.0408843 |
| S100Z    | -0.6253645 |
| S1PR5    | -1.7636681 |
| SAA1     | -2.729056  |
| SAA2     | -2.6070876 |
| SAA4     | -7.9072447 |
| SAAL1    | -1.50404   |



|         |            |
|---------|------------|
| SAC3D1  | -1.1230025 |
| SACM1L  | -0.8526206 |
| SAE1    | -0.4166098 |
| SAFB    | -0.2563748 |
| SALL1   | -7.405781  |
| SALL3   | -2.1782753 |
| SALL4   | -1.1091633 |
| SAMD10  | -0.3488054 |
| SAMD11  | -1.1470187 |
| SAMD7   | -2.2650795 |
| SAMM50  | -2.4887676 |
| SAMT2   | -0.7647424 |
| SAMT3   | -2.9127467 |
| SAMT4   | -2.0286984 |
| SAP30BP | -0.4778781 |
| SAP30L  | -0.8242197 |
| SAR1A   | -0.4217334 |
| SAR1B   | -3.1139646 |
| SARDH   | -8.232267  |
| SARS    | -0.3697166 |
| SARS2   | -2.2615967 |
| SART1   | -0.3036666 |
| SAT1    | -0.4408145 |
| SAT2    | -5.0435734 |
| SATL1   | -1.6274116 |
| SAYSD1  | -0.2925947 |
| SBF1    | -0.3886218 |
| SBK1    | -2.7777796 |
| SBK2    | -1.4507048 |
| SBP     | -2.3409233 |
| SBPL    | -1.6859608 |
| SBSPON  | -0.9352171 |
| SC5D    | -5.348201  |
| SCAF1   | -2.6827555 |
| SCAI    | -0.9803584 |
| SCAMP1  | -0.7426434 |
| SCAMP3  | -1.0500712 |
| SCAMP4  | -0.9187098 |
| SCAMP5  | -3.54979   |
| SCAND1  | -0.7403674 |
| SCAP    | -2.5970726 |
| SCARA3  | -1.1356754 |
| SCARB1  | -3.1311731 |
| SCARB2  | -0.4925599 |
| SCD1    | -3.032588  |

|             |            |
|-------------|------------|
| SCD3        | -2.8774352 |
| SCFD1       | -0.3576503 |
| SCFD2       | -0.7400231 |
| SCGB1B19    | -2.3827708 |
| SCGB1B20    | -1.8987188 |
| SCGB1B27    | -2.0931    |
| SCGB1B7     | -3.0133562 |
| SCGB2B12    | -2.2130861 |
| SCGB2B15    | -0.8146472 |
| SCGB2B21    | -2.0698202 |
| SCGB2B23-PS | -2.1642456 |
| SCGB2B24    | -2.117795  |
| SCGB2B26    | -2.2617912 |
| SCGB2B27    | -1.3752131 |
| SCGB2B3     | -2.2981389 |
| SCIMP       | -1.0815153 |
| SCLT1       | -0.5024529 |
| SCLY        | -2.7732987 |
| SCN1B       | -3.584895  |
| SCN2A1      | -0.6805804 |
| SCN4B       | -2.2116277 |
| SCN8A       | -2.138163  |
| SCN9A       | -2.2931855 |
| SCNM1       | -0.5489502 |
| SCNN1G      | -2.079151  |
| SCO1        | -1.2219448 |
| SCO2        | -4.680125  |
| SCP2        | -3.834577  |
| SCP2D1      | -1.8968697 |
| SCPEP1      | -1.6297598 |
| SCRN2       | -4.4971323 |
| SCRN3       | -2.1382403 |
| SCRT1       | -1.264792  |
| SCRT2       | -1.6155164 |
| SCYL1       | -0.7260585 |
| SCYL2       | -0.1839705 |
| SDC1        | -2.62494   |
| SDC2        | -3.4849148 |
| SDC3        | -1.9247618 |
| SDCCAG3     | -0.623848  |
| SDF2        | -0.8266525 |
| SDF2L1      | -0.6943264 |
| SDF4        | -1.1866245 |
| SDHA        | -1.9311495 |
| SDHAF1      | -1.7150402 |

|          |            |
|----------|------------|
| SDHAF2   | -0.3660097 |
| SDHB     | -2.4391727 |
| SDHC     | -2.4157243 |
| SDHD     | -2.9176192 |
| SDK2     | -0.4819074 |
| SDR16C5  | -1.7078459 |
| SDR39U1  | -1.2400699 |
| SDR42E1  | -6.257245  |
| SDR9C7   | -5.8573866 |
| SDS      | -10.433391 |
| SDSL     | -4.5471873 |
| SEBOX    | -3.6862102 |
| SEC11A   | -0.5901022 |
| SEC11C   | -0.6876497 |
| SEC13    | -1.1824465 |
| SEC14L2  | -5.6585646 |
| SEC14L4  | -2.4654555 |
| SEC16A   | -1.4828715 |
| SEC16B   | -6.4133844 |
| SEC22B   | -0.3268337 |
| SEC22C   | -2.0810513 |
| SEC23A   | -2.446622  |
| SEC24A   | -2.3106718 |
| SEC24C   | -0.7241221 |
| SEC24D   | -1.6540108 |
| SEC31A   | -0.9379883 |
| SEC31B   | -1.9357481 |
| SEC61A1  | -1.392498  |
| SEC61B   | -0.9173198 |
| SEC61G   | -0.2422047 |
| SEC62    | -1.1052804 |
| SEC63    | -0.8207665 |
| SECTM1A  | -3.5828514 |
| SECTM1B  | -1.5194044 |
| SEH1L    | -0.3124075 |
| SEL1L2   | -1.9629269 |
| SEL1L3   | -2.3545408 |
| SELENBP1 | -0.2480841 |
| SELK     | -0.4307303 |
| SELO     | -2.5148911 |
| SELT     | -0.9728055 |
| SEMA4A   | -1.2590914 |
| SEMA4B   | -0.7037921 |
| SEMA4C   | -1.9404736 |
| SEMA4G   | -9.631674  |

|             |            |
|-------------|------------|
| SEMA5B      | -2.7144728 |
| SEMA6C      | -1.3945322 |
| SEMA6D      | -1.6322494 |
| SENP3       | -0.8711152 |
| SENP5       | -0.2221737 |
| SEPHS1      | -0.8146155 |
| SEPHS2      | -4.45399   |
| SEPP1       | -2.5138845 |
| SEPSECS     | -1.9934235 |
| SEPW1       | -0.3135805 |
| SERBP1      | -0.2570262 |
| SERF1       | -1.1388135 |
| SERF2       | -1.5011272 |
| SERGEF      | -1.1599102 |
| SERHL       | -2.5722594 |
| SERINC1     | -0.8948255 |
| SERINC2     | -1.9843621 |
| SERINC5     | -0.9467115 |
| SERP1       | -0.3437281 |
| SERPINA10   | -8.862881  |
| SERPINA11   | -9.229885  |
| SERPINA12   | -1.7699893 |
| SERPINA1A   | -8.944029  |
| SERPINA1C   | -8.092239  |
| SERPINA1D   | -10.639513 |
| SERPINA1E   | -9.045399  |
| SERPINA3A   | -2.6463199 |
| SERPINA3C   | -3.3518624 |
| SERPINA3H   | -1.5488882 |
| SERPINA3J   | -4.229805  |
| SERPINA3K   | -13.409853 |
| SERPINA3M   | -6.083295  |
| SERPINA3N   | -1.1331272 |
| SERPINA4-PS | -1.8714948 |
| SERPINA5    | -2.726481  |
| SERPINA6    | -12.617292 |
| SERPINA7    | -10.524595 |
| SERPINB11   | -2.0483725 |
| SERPINB12   | -1.9450226 |
| SERPINB13   | -2.2306573 |
| SERPINB1C   | -1.6090484 |
| SERPINB3A   | -2.2731478 |
| SERPINB3B   | -2.5686843 |
| SERPINB3D   | -2.2457347 |
| SERPINB8    | -1.6228557 |

|           |            |
|-----------|------------|
| SERPINB9B | -1.8375592 |
| SERPINB9C | -1.3680615 |
| SERPINB9D | -2.0671723 |
| SERPINB9E | -2.1474555 |
| SERPINB9F | -2.0766048 |
| SERPINB9G | -2.2561781 |
| SERPINC1  | -12.439542 |
| SERPIND1  | -7.3367057 |
| SERPINF1  | -5.627309  |
| SERPINF2  | -12.38544  |
| SERPING1  | -2.182282  |
| SERPINI2  | -2.5422597 |
| SERTM1    | -1.6070881 |
| SESN1     | -0.8663368 |
| SESN3     | -0.5378146 |
| SETD1A    | -0.4084578 |
| SETD3     | -0.6032047 |
| SETD4     | -3.3556457 |
| SETD6     | -2.052857  |
| SETDB1    | -0.3597145 |
| SETMAR    | -1.2876766 |
| SEZ6      | -1.6732812 |
| SEZ6L     | -1.4671686 |
| SF1       | -0.2622905 |
| SF3A2     | -0.8731761 |
| SF3B2     | -0.9572587 |
| SF3B5     | -0.7684736 |
| SFMBT1    | -1.2029767 |
| SFR1      | -0.496366  |
| SFT2D1    | -0.7402787 |
| SFT2D2    | -0.7355108 |
| SFT2D3    | -1.0066786 |
| SFXN1     | -3.4687877 |
| SFXN2     | -3.4566855 |
| SFXN5     | -3.1255312 |
| SGK2      | -11.615125 |
| SGK3      | -0.427043  |
| SGMS2     | -1.373061  |
| SGPL1     | -1.2345686 |
| SGPP1     | -1.7726774 |
| SGSH      | -1.8287444 |
| SGSM1     | -1.3403964 |
| SGSM2     | -1.6232667 |
| SGSM3     | -1.5695372 |
| SGTA      | -1.362813  |

|          |            |
|----------|------------|
| SGTB     | -0.2703571 |
| SH2B1    | -1.1819444 |
| SH2D4A   | -1.3847399 |
| SH2D6    | -0.8762236 |
| SH2D7    | -1.5043681 |
| SH3BGRL2 | -0.977315  |
| SH3BP2   | -0.8266821 |
| SH3BP5L  | -0.4803429 |
| SH3GLB1  | -0.29389   |
| SH3GLB2  | -2.079381  |
| SH3RF2   | -0.6888292 |
| SH3YL1   | -1.652708  |
| SHANK1   | -0.3387387 |
| SHANK2   | -1.7965462 |
| SHARPIN  | -0.7054024 |
| SHB      | -0.2749553 |
| SHBG     | -2.6875074 |
| SHC1     | -0.5636501 |
| SHCBP1   | -0.4454641 |
| SHCBP1L  | -1.3350513 |
| SHF      | -3.7126608 |
| SHISA2   | -0.7378664 |
| SHISA3   | -0.9648018 |
| SHISA6   | -1.9054744 |
| SHMT1    | -5.7385187 |
| SHMT2    | -4.4311967 |
| SHPK     | -5.641552  |
| SHQ1     | -0.6047535 |
| SHROOM1  | -3.736471  |
| SHROOM2  | -0.672226  |
| SIAE     | -2.2738352 |
| SIAH2    | -1.5935173 |
| SIDT2    | -2.2245026 |
| SIGIRR   | -2.2113786 |
| SIGLEC1  | -1.6283467 |
| SIGMAR1  | -4.243677  |
| SIK3     | -0.5911379 |
| SIL1     | -2.4023633 |
| SIM1     | -2.0643868 |
| SIN3B    | -0.8304963 |
| SIRPA    | -0.8000307 |
| SIRT2    | -1.1181564 |
| SIRT3    | -4.235666  |
| SIRT4    | -0.6340137 |
| SIRT5    | -3.3474903 |

|           |            |
|-----------|------------|
| SIRT7     | -0.7708721 |
| SIS       | -2.1243253 |
| SIX2      | -1.6262951 |
| SIX3      | -0.7402396 |
| SIX5      | -0.414144  |
| SIX6      | -3.0608242 |
| SKI       | -0.4185426 |
| SKIDA1    | -0.4003015 |
| SKINT10   | -1.313909  |
| SKINT11   | -1.7245541 |
| SKINT2    | -1.4484713 |
| SKINT6    | -2.3680942 |
| SKINT7    | -1.7702703 |
| SKINT8    | -2.1158102 |
| SKINT9    | -0.8257086 |
| SKIV2L    | -1.4027977 |
| SKOR2     | -1.9400826 |
| SKP1A     | -1.4833579 |
| SKP2      | -0.8273256 |
| SLAIN1OS  | -2.355531  |
| SLC10A1   | -0.3111911 |
| SLC10A4   | -1.6843772 |
| SLC10A5   | -3.84167   |
| SLC11A1   | -0.7172456 |
| SLC12A1   | -1.6920962 |
| SLC12A5   | -0.7957809 |
| SLC12A7   | -1.9349709 |
| SLC12A8   | -1.3840022 |
| SLC12A9   | -1.4773552 |
| SLC13A1   | -1.792541  |
| SLC13A2OS | -1.6793795 |
| SLC13A3   | -4.4500146 |
| SLC13A5   | -5.0629716 |
| SLC14A2   | -2.7185032 |
| SLC15A4   | -0.5621753 |
| SLC15A5   | -2.0760822 |
| SLC16A10  | -1.9110899 |
| SLC16A11  | -0.6752071 |
| SLC16A12  | -4.3437757 |
| SLC16A2   | -3.9554234 |
| SLC16A4   | -0.7166402 |
| SLC16A5   | -8.506195  |
| SLC16A7   | -2.316067  |
| SLC17A1   | -10.36018  |
| SLC17A2   | -8.131926  |

|          |            |
|----------|------------|
| SLC17A3  | -5.7052755 |
| SLC17A4  | -8.36453   |
| SLC17A7  | -1.6217351 |
| SLC17A8  | -2.91898   |
| SLC17A9  | -1.8490496 |
| SLC18A1  | -1.5921915 |
| SLC19A1  | -1.836051  |
| SLC19A2  | -4.7153997 |
| SLC1A2   | -6.8591313 |
| SLC1A4   | -1.3714275 |
| SLC1A7   | -0.1746359 |
| SLC20A2  | -2.902903  |
| SLC22A1  | -8.548161  |
| SLC22A15 | -0.3481646 |
| SLC22A16 | -2.1628053 |
| SLC22A18 | -5.162029  |
| SLC22A19 | -2.217441  |
| SLC22A2  | -2.2576127 |
| SLC22A22 | -1.6292071 |
| SLC22A23 | -2.0679889 |
| SLC22A26 | -10.861592 |
| SLC22A27 | -8.87074   |
| SLC22A28 | -5.228238  |
| SLC22A29 | -7.6504717 |
| SLC22A3  | -2.8448489 |
| SLC22A30 | -6.3683023 |
| SLC22A4  | -1.6074836 |
| SLC22A5  | -0.8961263 |
| SLC22A7  | -10.950524 |
| SLC23A1  | -4.025301  |
| SLC24A1  | -1.9741824 |
| SLC25A1  | -3.9236336 |
| SLC25A10 | -3.5803802 |
| SLC25A11 | -1.281198  |
| SLC25A12 | -0.8699622 |
| SLC25A13 | -5.4867816 |
| SLC25A15 | -4.572854  |
| SLC25A16 | -2.4141955 |
| SLC25A17 | -1.1108041 |
| SLC25A19 | -0.4418469 |
| SLC25A20 | -2.3098392 |
| SLC25A21 | -7.458742  |
| SLC25A22 | -5.692093  |
| SLC25A23 | -4.5287914 |
| SLC25A25 | -2.253532  |



|          |            |
|----------|------------|
| SLC25A26 | -1.5550137 |
| SLC25A28 | -0.7606139 |
| SLC25A3  | -0.3792596 |
| SLC25A30 | -1.2119212 |
| SLC25A32 | -1.121078  |
| SLC25A33 | -1.8630424 |
| SLC25A34 | -1.7632332 |
| SLC25A37 | -0.2784329 |
| SLC25A38 | -1.1210546 |
| SLC25A39 | -4.2422    |
| SLC25A40 | -0.3083377 |
| SLC25A42 | -4.25071   |
| SLC25A44 | -2.6210525 |
| SLC25A45 | -1.9979191 |
| SLC25A46 | -0.791203  |
| SLC25A47 | -9.591143  |
| SLC25A48 | -4.6200457 |
| SLC25A5  | -2.0035768 |
| SLC25A51 | -0.2832112 |
| SLC25A54 | -2.0988686 |
| SLC26A1  | -8.048717  |
| SLC26A10 | -3.9775982 |
| SLC26A11 | -1.3851194 |
| SLC26A5  | -2.341643  |
| SLC26A6  | -1.5874727 |
| SLC26A7  | -2.2420328 |
| SLC26A8  | -1.650017  |
| SLC27A1  | -0.8870111 |
| SLC27A2  | -9.759994  |
| SLC27A5  | -12.944132 |
| SLC29A1  | -3.2170887 |
| SLC29A2  | -0.5533226 |
| SLC2A2   | -12.588102 |
| SLC2A5   | -8.498978  |
| SLC2A7   | -2.6425984 |
| SLC2A8   | -2.4887142 |
| SLC2A9   | -5.195262  |
| SLC30A10 | -8.410615  |
| SLC30A3  | -1.3252535 |
| SLC30A5  | -0.8460174 |
| SLC30A6  | -0.685308  |
| SLC30A8  | -3.2663953 |
| SLC30A9  | -0.9893842 |
| SLC31A1  | -2.019888  |
| SLC33A1  | -1.6827006 |

|           |            |
|-----------|------------|
| SLC34A3   | -2.044883  |
| SLC35A1   | -1.0500917 |
| SLC35A2   | -0.147295  |
| SLC35A3   | -1.4739451 |
| SLC35A5   | -0.4567931 |
| SLC35B1   | -0.3189583 |
| SLC35B2   | -2.3972583 |
| SLC35B3   | -0.5511599 |
| SLC35B4   | -1.2920895 |
| SLC35C1   | -0.6572771 |
| SLC35C2   | -2.1450882 |
| SLC35D1   | -3.7148519 |
| SLC35D2   | -4.1154904 |
| SLC35D3   | -1.6527238 |
| SLC35E2   | -2.7862973 |
| SLC35F1   | -1.644156  |
| SLC35F4   | -2.1032746 |
| SLC35F5   | -1.4210095 |
| SLC35F6   | -1.0315847 |
| SLC35G1   | -3.0026383 |
| SLC36A1   | -0.838433  |
| SLC36A1OS | -2.6630616 |
| SLC37A2   | -0.8417273 |
| SLC37A3   | -0.2062206 |
| SLC37A4   | -5.483773  |
| SLC38A10  | -0.7368856 |
| SLC38A11  | -2.81902   |
| SLC38A3   | -12.270025 |
| SLC38A4   | -4.0996275 |
| SLC38A6   | -0.496129  |
| SLC38A7   | -2.2601013 |
| SLC38A8   | -2.3397074 |
| SLC39A1   | -0.540174  |
| SLC39A11  | -1.7828941 |
| SLC39A12  | -1.4063585 |
| SLC39A13  | -0.3210149 |
| SLC39A14  | -1.2655792 |
| SLC39A4   | -1.9148717 |
| SLC39A5   | -4.2030773 |
| SLC39A7   | -0.263032  |
| SLC3A1    | -7.849313  |
| SLC40A1   | -5.7468877 |
| SLC41A2   | -2.3828    |
| SLC41A3   | -1.7868195 |
| SLC43A1   | -3.1925552 |

|          |            |
|----------|------------|
| SLC44A1  | -0.5697846 |
| SLC44A3  | -0.8441072 |
| SLC44A5  | -3.352324  |
| SLC45A1  | -2.849873  |
| SLC45A2  | -2.7454379 |
| SLC46A1  | -5.1277604 |
| SLC46A2  | -1.537857  |
| SLC46A3  | -2.8347497 |
| SLC47A1  | -6.6248817 |
| SLC48A1  | -1.0417047 |
| SLC4A10  | -2.156392  |
| SLC4A2   | -0.7823796 |
| SLC4A4   | -3.1235995 |
| SLC4A9   | -4.817404  |
| SLC51B   | -6.2275176 |
| SLC52A2  | -1.4195223 |
| SLC5A10  | -0.867204  |
| SLC5A11  | -2.2218668 |
| SLC5A12  | -1.2008634 |
| SLC5A4A  | -1.6156828 |
| SLC5A4B  | -2.2606485 |
| SLC5A5   | -1.8339553 |
| SLC5A6   | -1.9867449 |
| SLC5A7   | -1.7745192 |
| SLC5A8   | -1.4031432 |
| SLC6A1   | -2.4880166 |
| SLC6A11  | -2.1051197 |
| SLC6A12  | -8.741934  |
| SLC6A13  | -9.146566  |
| SLC6A15  | -0.6237049 |
| SLC6A16  | -1.24881   |
| SLC6A17  | -3.0797548 |
| SLC6A18  | -1.7068057 |
| SLC6A19  | -1.8263798 |
| SLC6A20B | -2.1280239 |
| SLC6A5   | -2.1120932 |
| SLC6A6   | -0.7370982 |
| SLC6A9   | -1.1929326 |
| SLC7A12  | -2.0822532 |
| SLC7A13  | -1.7636881 |
| SLC7A14  | -2.168707  |
| SLC7A15  | -2.6417465 |
| SLC7A2   | -3.4659789 |
| SLC7A4   | -0.602181  |
| SLC7A6OS | -0.5705457 |

|          |            |
|----------|------------|
| SLC7A7   | -0.7139144 |
| SLC7A9   | -2.2129538 |
| SLC8A2   | -1.001718  |
| SLC8B1   | -2.9952247 |
| SLC9A3   | -2.0675354 |
| SLC9A3R1 | -2.2243352 |
| SLC9A6   | -0.3437352 |
| SLC9A8   | -0.8089571 |
| SLC9A9   | -0.9293704 |
| SLCO1A1  | -7.6527586 |
| SLCO1A4  | -10.988667 |
| SLCO1B2  | -14.873056 |
| SLCO1C1  | -1.7190104 |
| SLCO2B1  | -3.8641057 |
| SLCO6B1  | -2.2475033 |
| SLCO6C1  | -2.1062427 |
| SLCO6D1  | -2.184393  |
| SLFN14   | -2.0220184 |
| SLFN5    | -0.77917   |
| SLFNL1   | -1.6738696 |
| SLIRP    | -1.0586929 |
| SLITRK1  | -2.1213222 |
| SLITRK2  | -1.8209796 |
| SLITRK4  | -1.2081506 |
| SLITRK5  | -3.3502886 |
| SLMAP    | -0.2090001 |
| SLMO2    | -0.7679796 |
| SLX1B    | -0.6384382 |
| SLXL1    | -2.1706738 |
| SLY      | -1.8609319 |
| SMAD9    | -0.758513  |
| SMAGP    | -1.2927594 |
| SMAP2    | -0.680491  |
| SMARCA2  | -0.6023111 |
| SMARCAD1 | -0.3524175 |
| SMARCC1  | -1.1977267 |
| SMARCC2  | -1.6625304 |
| SMARCD2  | -1.5747657 |
| SMC1B    | -5.460205  |
| SMC2OS   | -2.7573466 |
| SMC6     | -0.661736  |
| SMCO2    | -3.7447062 |
| SMCO3    | -1.906743  |
| SMCO4    | -1.6962161 |
| SMCR8    | -0.3643017 |

|         |            |
|---------|------------|
| SMDT1   | -1.2701945 |
| SMEK1   | -0.5730453 |
| SMG5    | -0.7074966 |
| SMG6    | -0.7679701 |
| SMG7    | -0.5851941 |
| SMG8    | -2.3178236 |
| SMG9    | -0.4892244 |
| SMGC    | -1.9877768 |
| SMIM1   | -1.1759195 |
| SMIM11  | -0.5069747 |
| SMIM12  | -1.2523723 |
| SMIM13  | -0.954174  |
| SMIM14  | -1.1442599 |
| SMIM18  | -1.4871004 |
| SMIM19  | -1.5914264 |
| SMIM20  | -1.8733974 |
| SMIM22  | -0.4952436 |
| SMIM24  | -0.2774701 |
| SMIM4   | -1.7768989 |
| SMIM6   | -1.3736451 |
| SMIM7   | -1.0914307 |
| SMIM8   | -1.6304212 |
| SMLR1   | -12.867917 |
| SMN1    | -0.2225585 |
| SMNDC1  | -1.5020709 |
| SMO     | -1.1242752 |
| SMOC1   | -7.260091  |
| SMOC2   | -1.3567166 |
| SMOK2A  | -2.296392  |
| SMOK3A  | -2.064489  |
| SMOK3B  | -2.492024  |
| SMPD1   | -0.830462  |
| SMPD2   | -2.9544468 |
| SMPD3   | -0.962245  |
| SMPD4   | -0.7729044 |
| SMPD5   | -2.60754   |
| SMPDL3A | -0.6509023 |
| SMR3A   | -1.8780041 |
| SMU1    | -0.8329735 |
| SMUG1   | -0.7039366 |
| SMURF1  | -0.703218  |
| SMYD1   | -1.7113998 |
| SMYD2   | -2.0233164 |
| SMYD4   | -1.0776451 |
| SMYD5   | -1.659111  |

|          |            |
|----------|------------|
| SNAI2    | -2.3305497 |
| SNAI3    | -1.6348691 |
| SNAP47   | -3.417512  |
| SNAP91   | -2.20548   |
| SNAPC2   | -1.1994557 |
| SNCB     | -1.4687433 |
| SND1     | -0.5221496 |
| SNF8     | -1.2244387 |
| SNHG10   | -0.4072151 |
| SNHG12   | -0.5819969 |
| SNHG3    | -0.614028  |
| SNHG6    | -0.7291322 |
| SNHG7    | -0.4851813 |
| SNHG8    | -2.2182238 |
| SNHG9    | -1.5581322 |
| SNIP1    | -0.7156892 |
| SNORA47  | -2.2008884 |
| SNPH     | -1.5093551 |
| SNRNP200 | -0.4965434 |
| SNRNP25  | -1.9204774 |
| SNRNP27  | -0.3351631 |
| SNRPA    | -0.4106851 |
| SNRPD2   | -0.93887   |
| SNRPD3   | -0.2521133 |
| SNRPN    | -1.6249886 |
| SNTB1    | -1.445261  |
| SNTG1    | -3.1039708 |
| SNTG2    | -3.3833895 |
| SNUPN    | -0.6533341 |
| SNX12    | -0.236084  |
| SNX14    | -0.5731354 |
| SNX15    | -1.3806314 |
| SNX19    | -0.8402343 |
| SNX2     | -0.4840093 |
| SNX21    | -1.161047  |
| SNX24    | -1.1389887 |
| SNX3     | -0.3923907 |
| SNX31    | -2.1501334 |
| SNX32    | -1.4343233 |
| SNX33    | -1.0284028 |
| SNX5     | -0.4777494 |
| SNX7     | -0.4025974 |
| SNX8     | -1.3287597 |
| SNX9     | -0.504324  |
| SOAT2    | -4.387118  |

|            |            |
|------------|------------|
| SOD1       | -2.3489885 |
| SOD2       | -0.2273588 |
| SOGA3      | -1.821131  |
| SOHLH2     | -0.4122005 |
| SORBS2     | -5.1311665 |
| SORBS2OS   | -2.112611  |
| SORCS3     | -2.1140387 |
| SORD       | -5.950992  |
| SOSTDC1    | -1.0191817 |
| SOWAHB     | -3.1154747 |
| SOWAHD     | -2.8521419 |
| SOX1       | -2.350959  |
| SOX12      | -0.4055283 |
| SOX3       | -2.31667   |
| SOX30      | -1.9915388 |
| SOX5       | -0.9686456 |
| SOX5IT     | -1.734138  |
| SOX5OS1    | -1.5959554 |
| SOX5OS3    | -2.204908  |
| SOX6       | -2.8430424 |
| SOX6OS     | -2.8603003 |
| SOX8       | -1.9826488 |
| SOX9       | -0.5681496 |
| SP110      | -1.5216093 |
| SP5        | -1.9383438 |
| SP7        | -2.2112203 |
| SP8        | -0.4185157 |
| SP9        | -2.1463647 |
| SPACA1     | -1.447578  |
| SPACA5     | -2.2025714 |
| SPACA7     | -1.0951328 |
| SPAG11B    | -1.080317  |
| SPAG4      | -4.505172  |
| SPAG7      | -1.749795  |
| SPANXN4    | -2.183811  |
| SPAST      | -1.1718102 |
| SPATA16    | -1.9437253 |
| SPATA21    | -1.3786225 |
| SPATA22    | -5.2934732 |
| SPATA24    | -1.6182814 |
| SPATA2L    | -3.9933286 |
| SPATA3     | -1.4325938 |
| SPATA31D1C | -2.6556818 |
| SPATA31D1D | -1.0877345 |
| SPATA32    | -0.9485135 |

|            |            |
|------------|------------|
| SPATA4     | -3.2704065 |
| SPATA45    | -2.833475  |
| SPATS1     | -1.5407696 |
| SPC24      | -2.6397107 |
| SPC25      | -2.0561543 |
| SPCS1      | -0.6548195 |
| SPCS2      | -0.491004  |
| SPCS3      | -1.1147842 |
| SPDL1      | -0.5860355 |
| SPDYA      | -0.8031952 |
| SPDYB      | -1.8079762 |
| SPEER3     | -0.7386513 |
| SPEER4E    | -2.0685332 |
| SPEER4F    | -0.5729771 |
| SPEER6-PS1 | -2.0517178 |
| SPEER7-PS1 | -2.0039692 |
| SPEER9-PS1 | -1.646066  |
| SPESP1     | -1.5521228 |
| SPG20      | -0.6342673 |
| SPG7       | -1.1710129 |
| SPHK2      | -1.3447351 |
| SPIC       | -1.0710025 |
| SPIN2C     | -1.7252328 |
| SPINK10    | -2.3137832 |
| SPINK11    | -2.9338741 |
| SPINK12    | -2.198236  |
| SPINK13    | -2.7334034 |
| SPINK14    | -2.1706371 |
| SPINK3     | -7.664747  |
| SPINK6     | -2.1561615 |
| SPINK7     | -2.4058173 |
| SPINK8     | -2.0846741 |
| SPINKL     | -2.1108391 |
| SPINT3     | -3.0507073 |
| SPINT4     | -2.3679507 |
| SPIRE2     | -1.840828  |
| SPNS2      | -1.6040602 |
| SPNS3      | -1.9201465 |
| SPOCD1     | -1.2045405 |
| SPOCK1     | -1.606816  |
| SPOCK3     | -2.2891562 |
| SPON2      | -4.525356  |
| SPOP       | -0.1652641 |
| SPP1       | -0.8040538 |
| SPP2       | -13.750578 |



|           |            |
|-----------|------------|
| SPPL2B    | -1.0079656 |
| SPPL2C    | -0.5130508 |
| SPR       | -3.133532  |
| SPRED3    | -2.1066353 |
| SPRN      | -1.8493693 |
| SPRR1A    | -3.5967958 |
| SPRR1B    | -2.0650444 |
| SPRR2A1   | -1.9799826 |
| SPRR2A2   | -0.5768094 |
| SPRR2D    | -2.1758723 |
| SPRR2E    | -2.3454342 |
| SPRR2F    | -2.2667487 |
| SPRR2G    | -2.0302668 |
| SPRR2H    | -1.994842  |
| SPRR2I    | -2.2276144 |
| SPRR2J-PS | -2.1604996 |
| SPRR2K    | -2.0107057 |
| SPRR3     | -1.9632182 |
| SPRY3     | -1.9839432 |
| SPRYD3    | -0.6220255 |
| SPRYD4    | -3.620718  |
| SPSB2     | -1.1924329 |
| SPSB3     | -0.7032638 |
| SPSB4     | -4.064208  |
| SPTBN2    | -5.3778486 |
| SPTBN5    | -1.64924   |
| SPTSSA    | -1.7817898 |
| SPZ1      | -2.168092  |
| SQLE      | -3.2110653 |
| SQRDL     | -2.7044458 |
| SQSTM1    | -1.1690922 |
| SRA1      | -1.0952454 |
| SRBD1     | -0.5008245 |
| SRCRB4D   | -1.5720577 |
| SRD5A1    | -5.494211  |
| SRD5A2    | -1.5021994 |
| SREBF1    | -3.052566  |
| SREBF2    | -0.2980819 |
| SREK1     | -1.6698174 |
| SREK1IP1  | -1.3804073 |
| SRM       | -1.5371895 |
| SRMS      | -2.0182993 |
| SRP68     | -0.6574817 |
| SRP72     | -1.3407569 |
| SRP9      | -0.9483314 |

|         |            |
|---------|------------|
| SRPK1   | -0.2671838 |
| SRPR    | -1.2917562 |
| SRPX2   | -1.0328507 |
| SRR     | -3.1695614 |
| SRRD    | -1.5743728 |
| SRRM3OS | -3.100326  |
| SRRM4OS | -2.4743721 |
| SRSF2   | -0.1563735 |
| SRSF9   | -0.4762373 |
| SRXN1   | -2.1356401 |
| SSBP1   | -0.4711747 |
| SSBP3   | -1.6685319 |
| SSBP4   | -0.347908  |
| SSFA2   | -1.2841034 |
| SSH1    | -0.7147207 |
| SSMEM1  | -1.1632662 |
| SSNA1   | -1.2565331 |
| SSPO    | -1.8644888 |
| SSR1    | -0.6283855 |
| SSR2    | -1.2853379 |
| SSR3    | -0.9905138 |
| SSR4    | -1.9492645 |
| SSRP1   | -0.6830692 |
| SSSCA1  | -1.9278402 |
| SST     | -2.1804624 |
| SSTR1   | -1.6492901 |
| SSTR2   | -2.0337832 |
| SSTR5   | -1.0350232 |
| SSTY1   | -2.4708867 |
| SSU2    | -0.5039628 |
| SSU72   | -0.4306474 |
| SSX9    | -2.2621903 |
| SSXA1   | -1.4989641 |
| SSXB1   | -1.5261571 |
| SSXB10  | -1.5721846 |
| SSXB2   | -2.0432458 |
| SSXB6   | -4.0249653 |
| SSXB8   | -2.4825006 |
| ST13    | -0.6439681 |
| ST18    | -2.09269   |
| ST3GAL3 | -2.700426  |
| ST3GAL4 | -1.9073491 |
| ST3GAL5 | -3.386994  |
| ST5     | -0.8489132 |
| ST6GAL1 | -3.2674646 |

|            |            |
|------------|------------|
| ST6GAL2    | -1.0987267 |
| ST6GALNAC4 | -0.2384458 |
| ST6GALNAC6 | -2.9841895 |
| ST7        | -0.2749114 |
| ST7L       | -1.3312016 |
| ST8SIA2    | -1.9267757 |
| STAB1      | -1.2819338 |
| STAB2      | -7.389632  |
| STAC3      | -0.9193454 |
| STAG3      | -2.0726225 |
| STAMBP     | -0.4948502 |
| STAMOS     | -2.2799497 |
| STAP2      | -0.7917991 |
| STARD10    | -5.5636225 |
| STARD4     | -1.5069213 |
| STARD5     | -3.5930681 |
| STARD7     | -2.331409  |
| STAT5A     | -1.0453105 |
| STAT5B     | -0.9189572 |
| STAU1      | -1.0906649 |
| STBD1      | -2.3016572 |
| STC1       | -1.5385628 |
| STEAP2     | -0.4382362 |
| STEAP3     | -1.7574477 |
| STEAP4     | -0.5608926 |
| STIM2      | -0.7229827 |
| STK11      | -1.2391162 |
| STK16      | -2.6081862 |
| STK25      | -0.1693745 |
| STK31      | -2.0999024 |
| STK32B     | -2.1708682 |
| STK38L     | -1.0387068 |
| STOM       | -1.0646977 |
| STOML2     | -1.886559  |
| STOX2      | -0.6979423 |
| STPG2      | -2.0013113 |
| STRA13     | -1.7394295 |
| STRA8      | -0.2906418 |
| STRADB     | -1.75489   |
| STRAP      | -1.3177619 |
| STRBP      | -1.2197673 |
| STRM       | -2.0718524 |
| STRN4      | -0.3652492 |
| STS        | -2.714851  |
| STT3A      | -0.6449089 |

|         |            |
|---------|------------|
| STT3B   | -0.5869422 |
| STUB1   | -1.7027087 |
| STX17   | -0.5401502 |
| STX18   | -0.6719575 |
| STX2    | -0.9452717 |
| STX4A   | -0.3583574 |
| STX5A   | -0.5189338 |
| STXBP2  | -0.7780271 |
| STXBP4  | -0.3801763 |
| STXBP5L | -2.058811  |
| STXBP6  | -0.794589  |
| SUCLA2  | -2.2641406 |
| SUCLG1  | -3.1170287 |
| SUCLG2  | -4.8445234 |
| SUCNR1  | -8.300907  |
| SUDS3   | -2.3190317 |
| SUGCT   | -4.904253  |
| SUGP1   | -0.206471  |
| SULT1A1 | -3.409605  |
| SULT1B1 | -9.675133  |
| SULT1C1 | -1.9785957 |
| SULT1C2 | -7.5209475 |
| SULT1D1 | -3.8701086 |
| SULT1E1 | -9.875339  |
| SULT2A1 | -14.640081 |
| SULT2A2 | -14.634623 |
| SULT2A3 | -8.349548  |
| SULT2A4 | -12.607882 |
| SULT2A6 | -13.145536 |
| SULT2A7 | -4.1124105 |
| SULT3A1 | -9.702054  |
| SULT4A1 | -2.7915978 |
| SULT5A1 | -0.7753863 |
| SUMF1   | -0.7413158 |
| SUMF2   | -2.05244   |
| SUMO3   | -1.8174009 |
| SUN2    | -0.2933106 |
| SUN3    | -3.908213  |
| SUN5    | -0.9135664 |
| SUOX    | -3.7510195 |
| SUPT16  | -0.2558231 |
| SUPT3   | -1.8138201 |
| SUPV3L1 | -1.1199574 |
| SURF1   | -1.3958106 |
| SURF2   | -1.5789065 |

|           |            |
|-----------|------------|
| SURF4     | -0.7955222 |
| SUSD1     | -1.4640498 |
| SUV39H2   | -1.8950496 |
| SUV420H2  | -0.5416737 |
| SV2B      | -2.3452811 |
| SVAL2     | -2.2143135 |
| SVIP      | -1.0888171 |
| SVOP      | -2.7086737 |
| SVS1      | -1.8157134 |
| SVS2      | -2.2707577 |
| SVS3A     | -2.1569033 |
| SVS3B     | -2.2428703 |
| SVS4      | -2.109284  |
| SVS6      | -2.264689  |
| SWI5      | -0.8109083 |
| SYAP1     | -1.284338  |
| SYBU      | -2.4160025 |
| SYCE2     | -0.7546372 |
| SYCE3     | -4.3007593 |
| SYCP1     | -2.075706  |
| SYCP1-PS1 | -2.1358137 |
| SYCP2L    | -1.5707393 |
| SYCP3     | -1.4305894 |
| SYMPK     | -1.3341289 |
| SYN1      | -1.571888  |
| SYNB      | -0.5942488 |
| SYNDIG1   | -1.9371173 |
| SYNDIG1L  | -3.4629006 |
| SYNE3     | -0.574276  |
| SYNE4     | -1.0206609 |
| SYNGAP1   | -0.4844542 |
| SYNGR2    | -0.6408052 |
| SYNGR3    | -1.0447037 |
| SYNGR4    | -2.3834195 |
| SYNJ2     | -0.7234037 |
| SYNJ2BP   | -0.9570794 |
| SYNPO2L   | -1.8396187 |
| SYNPR     | -1.6229787 |
| SYP       | -0.6484227 |
| SYPL      | -0.1789141 |
| SYPL2     | -2.4091387 |
| SYS1      | -1.6808572 |
| SYT1      | -5.428543  |
| SYT10     | -4.9594526 |
| SYT17     | -1.2047386 |

|         |            |
|---------|------------|
| SYT2    | -2.0663981 |
| SYT3    | -3.4073236 |
| SYT4    | -1.986289  |
| SYT6    | -3.2606356 |
| SYT8    | -1.0963664 |
| SYT9    | -1.5209613 |
| SYTL1   | -1.3572803 |
| SYTL4   | -0.6859169 |
| SYTL5   | -2.5883243 |
| SYVN1   | -0.8480148 |
| SZRD1   | -1.2110472 |
| SZT2    | -0.4100308 |
| TAAR1   | -2.0708437 |
| TAAR2   | -2.0613756 |
| TAAR3   | -1.8502862 |
| TAAR5   | -2.2061906 |
| TAAR7A  | -2.2223165 |
| TAAR7D  | -2.1361754 |
| TAAR7E  | -2.1754477 |
| TAAR8A  | -2.1313756 |
| TAAR8B  | -2.1363912 |
| TAB1    | -0.4437051 |
| TAC1    | -2.068255  |
| TACC3   | -0.3428559 |
| TACO1   | -3.2608838 |
| TACO1OS | -1.5870721 |
| TACR3   | -2.1901066 |
| TADA1   | -0.4563866 |
| TADA2A  | -0.8782439 |
| TADA2B  | -0.4719417 |
| TAF10   | -1.2178235 |
| TAF11   | -0.4221149 |
| TAF13   | -0.4880829 |
| TAF15   | -0.5570068 |
| TAF2    | -0.2563763 |
| TAF6L   | -1.1238017 |
| TAF9    | -1.3244076 |
| TALDO1  | -0.8925734 |
| TAMM41  | -0.6219392 |
| TANGO2  | -2.9166193 |
| TAOK2   | -0.427794  |
| TAOK3   | -0.2454023 |
| TAP2    | -0.2848148 |
| TAPBPL  | -0.4188094 |
| TAPT1   | -1.5405235 |

|          |            |
|----------|------------|
| TARBP2   | -0.4289379 |
| TARS     | -1.5523124 |
| TARS2    | -1.5499864 |
| TARSL2   | -2.1074092 |
| TAS1R2   | -2.174288  |
| TAS1R3   | -3.0236278 |
| TAS2R102 | -1.9621398 |
| TAS2R103 | -1.9532526 |
| TAS2R104 | -3.7390146 |
| TAS2R105 | -2.2230172 |
| TAS2R107 | -1.4830256 |
| TAS2R108 | -2.0979662 |
| TAS2R109 | -0.8939726 |
| TAS2R110 | -1.8043487 |
| TAS2R113 | -1.9090202 |
| TAS2R114 | -3.1132245 |
| TAS2R115 | -1.6066489 |
| TAS2R116 | -2.232288  |
| TAS2R117 | -1.8252065 |
| TAS2R118 | -1.6325307 |
| TAS2R119 | -2.372026  |
| TAS2R120 | -2.0836563 |
| TAS2R121 | -2.2472038 |
| TAS2R122 | -2.1059358 |
| TAS2R123 | -2.215247  |
| TAS2R125 | -2.145832  |
| TAS2R126 | -1.8971579 |
| TAS2R129 | -1.687532  |
| TAS2R130 | -1.9338107 |
| TAS2R135 | -1.8862517 |
| TAS2R136 | -1.9792945 |
| TAS2R138 | -2.6428277 |
| TAS2R139 | -1.7250166 |
| TAS2R140 | -2.0209515 |
| TAS2R144 | -2.0576735 |
| TAT      | -10.557934 |
| TATDN1   | -0.6161883 |
| TATDN2   | -2.0630798 |
| TATDN3   | -1.7661672 |
| TAZ      | -0.7283444 |
| TBATA    | -0.9813986 |
| TBC1D13  | -1.252821  |
| TBC1D15  | -0.3465395 |
| TBC1D17  | -1.1171179 |
| TBC1D21  | -1.0582421 |

|          |            |
|----------|------------|
| TBC1D22A | -0.3024907 |
| TBC1D24  | -2.5881689 |
| TBC1D2B  | -0.2090669 |
| TBC1D31  | -1.6483037 |
| TBC1D7   | -2.8332198 |
| TBC1D8B  | -0.418715  |
| TBC1D9B  | -0.5896163 |
| TBCA     | -1.2360778 |
| TBCCD1   | -2.0151844 |
| TBCD     | -1.2520556 |
| TBCEL    | -1.2822518 |
| TBL2     | -1.2268221 |
| TBL3     | -1.3301153 |
| TBP      | -0.3116665 |
| TBPL2    | -1.9675708 |
| TBR1     | -2.1457238 |
| TBRG4    | -1.3391573 |
| TBX15    | -1.5376449 |
| TBX18    | -2.142458  |
| TBX20    | -0.7027609 |
| TBX3OS1  | -2.0932503 |
| TBXA2R   | -2.3289335 |
| TBXAS1   | -1.2224326 |
| TCAIM    | -1.4299722 |
| TCAM1    | -1.4931612 |
| TCEA1    | -0.7177315 |
| TCEA2    | -0.8223164 |
| TCEA3    | -2.5892692 |
| TCEAL5   | -2.8566298 |
| TCEB1    | -0.184072  |
| TCEB2    | -0.6078253 |
| TCEB3    | -0.394506  |
| TCERG1L  | -1.8083875 |
| TCF19    | -1.2635269 |
| TCF24    | -4.792281  |
| TCF25    | -0.9559441 |
| TCF3     | -0.4181461 |
| TCF7L1   | -0.8166065 |
| TCHHL1   | -2.0165927 |
| TCIRG1   | -1.83356   |
| TCL1     | -2.0801978 |
| TCL1B1   | -2.0590696 |
| TCL1B3   | -1.6867337 |
| TCL1B4   | -1.324444  |
| TCL1B5   | -1.9729786 |



|         |            |
|---------|------------|
| TCN2    | -1.0630946 |
| TCP1    | -0.4201694 |
| TCRA    | -1.3174419 |
| TCRB-J  | -0.5201943 |
| TCTA    | -1.268539  |
| TCTN1   | -1.2181358 |
| TDH     | -0.6786523 |
| TDO2    | -9.836445  |
| TDP2    | -1.6534071 |
| TDPOZ1  | -3.5332322 |
| TDPOZ2  | -2.1739972 |
| TDPOZ3  | -1.9529047 |
| TDRD1   | -2.0744774 |
| TDRD6   | -2.0369458 |
| TDRP    | -2.0431476 |
| TEC     | -2.2180727 |
| TECPR2  | -0.7636714 |
| TECR    | -3.219027  |
| TECTA   | -1.9778805 |
| TECTB   | -1.9384322 |
| TEDDM1  | -2.8670805 |
| TEF     | -0.3472357 |
| TEFM    | -1.6406384 |
| TELO2   | -1.1739454 |
| TENM1   | -1.6633744 |
| TENM3   | -3.2837617 |
| TENM4   | -1.9491353 |
| TEP1    | -0.4767289 |
| TERF1   | -0.7446952 |
| TESK2   | -1.9468274 |
| TET1    | -2.7099261 |
| TEX101  | -1.6612785 |
| TEX12   | -3.2962523 |
| TEX14   | -2.4537494 |
| TEX16   | -3.6783724 |
| TEX18   | -2.2392166 |
| TEX19.1 | -2.3573868 |
| TEX2    | -3.0631628 |
| TEX21   | -1.4686255 |
| TEX22   | -6.216119  |
| TEX24   | -2.0614314 |
| TEX261  | -0.8350024 |
| TEX264  | -1.9702458 |
| TEX33   | -1.9857068 |
| TEX35   | -2.018161  |

|          |            |
|----------|------------|
| TEX36    | -0.9799142 |
| TEX37    | -1.4438379 |
| TFAM     | -1.9533448 |
| TFAP2B   | -2.2631352 |
| TFAP2D   | -1.2701373 |
| TFAP2E   | -2.0954225 |
| TFAP4    | -2.2388933 |
| TFB1M    | -1.9795375 |
| TFB2M    | -1.5837936 |
| TFCP2    | -0.824846  |
| TFDP1    | -0.6876035 |
| TFEB     | -0.7642007 |
| TFEC     | -0.9191876 |
| TFF3     | -7.839992  |
| TFG      | -0.7068906 |
| TFIP11   | -0.9577413 |
| TFPI2    | -5.582143  |
| TFPT     | -1.0797873 |
| TFR2     | -10.785865 |
| TFRC     | -0.4691982 |
| TGDS     | -1.6556859 |
| TGFA     | -1.1702721 |
| TGFBRAP1 | -1.0211115 |
| TGM3     | -0.9771309 |
| TGM4     | -0.9620583 |
| TGM5     | -2.0965507 |
| TGM7     | -2.2768207 |
| TGS1     | -0.2209606 |
| TGTP1    | -0.9548183 |
| TGTP2    | -0.7469606 |
| THA1     | -1.3670616 |
| THADA    | -0.7759399 |
| THAP11   | -0.784965  |
| THAP3    | -0.9623652 |
| THAP4    | -1.1998715 |
| THAP6    | -0.889359  |
| THAP7    | -1.166451  |
| THBS2    | -1.8070953 |
| THEM4    | -2.0226505 |
| THEM5    | -0.4406436 |
| THEM6    | -1.491533  |
| THEM7    | -7.1512413 |
| THEMIS3  | -1.7749207 |
| THNSL1   | -0.5785217 |
| THNSL2   | -4.35254   |

|         |            |
|---------|------------|
| THOC1   | -0.1994619 |
| THOC3   | -1.2568917 |
| THOC5   | -0.7597561 |
| THOC7   | -1.4196758 |
| THOP1   | -1.3558893 |
| THPO    | -4.452317  |
| THRB    | -1.4990852 |
| THRSP   | -7.7316117 |
| THSD1   | -0.6677947 |
| THSD7B  | -2.1004956 |
| THTPA   | -2.3993635 |
| THUMPD1 | -0.4330678 |
| THUMPD2 | -0.8899024 |
| THUMPD3 | -0.4998007 |
| THYN1   | -1.0155468 |
| TIAL1   | -0.5702758 |
| TICAM1  | -1.0631824 |
| TIGD2   | -0.3585811 |
| TIGD4   | -0.5154102 |
| TIGD5   | -1.9270747 |
| TIMD2   | -8.706593  |
| TIMD4   | -4.0530624 |
| TIMM10  | -1.6554446 |
| TIMM10B | -0.6468802 |
| TIMM13  | -2.2897654 |
| TIMM17A | -0.175477  |
| TIMM17B | -2.104773  |
| TIMM21  | -1.6169133 |
| TIMM22  | -0.8629746 |
| TIMM23  | -1.5937676 |
| TIMM44  | -1.9909167 |
| TIMM50  | -1.9905152 |
| TIMM8A1 | -3.2404137 |
| TIMM8B  | -1.6075182 |
| TIMM9   | -1.6395774 |
| TIMMDC1 | -1.7724571 |
| TINF2   | -0.9597592 |
| TIPIN   | -0.2377887 |
| TIPRL   | -0.3426166 |
| TJP3    | -1.8951292 |
| TK1     | -4.062481  |
| TK2     | -1.0107889 |
| TKT     | -1.5355086 |
| TKTL1   | -2.091543  |
| TLCD1   | -3.8990426 |

|         |            |
|---------|------------|
| TLCD2   | -4.5297194 |
| TLDC1   | -1.7625532 |
| TLK1    | -0.5441442 |
| TLL2    | -2.3565402 |
| TLR1    | -0.3927894 |
| TLR12   | -3.2303119 |
| TLR3    | -1.2047069 |
| TLR5    | -2.0681663 |
| TLR9    | -3.8905835 |
| TLX2    | -2.1731224 |
| TLX3    | -2.0316434 |
| TM2D1   | -0.3250289 |
| TM2D2   | -1.2290125 |
| TM2D3   | -1.2615232 |
| TM4SF20 | -2.1856813 |
| TM4SF4  | -6.4983187 |
| TM4SF5  | -1.7989802 |
| TM6SF2  | -6.0114822 |
| TM7SF2  | -6.412522  |
| TM7SF3  | -2.6875076 |
| TM9SF1  | -1.1684704 |
| TM9SF2  | -1.198442  |
| TM9SF4  | -1.0410013 |
| TMA7    | -0.615324  |
| TMBIM4  | -1.6204338 |
| TMBIM6  | -2.712687  |
| TMBIM7  | -1.3356271 |
| TMC1    | -1.5613208 |
| TMC2    | -1.4060616 |
| TMC3    | -2.6976924 |
| TMC6    | -0.5869918 |
| TMC8    | -0.5322266 |
| TMCC1   | -0.2615876 |
| TMCO1   | -1.5074315 |
| TMCO2   | -1.8803375 |
| TMCO5   | -3.9519851 |
| TMED1   | -2.1203241 |
| TMED10  | -0.2337937 |
| TMED11  | -1.4707346 |
| TMED2   | -0.7714338 |
| TMED4   | -1.6943097 |
| TMED5   | -1.0577426 |
| TMED6   | -1.8612609 |
| TMED7   | -1.1992893 |
| TMEM101 | -0.6554399 |

|           |            |
|-----------|------------|
| TMEM102   | -1.9762042 |
| TMEM104   | -0.8200898 |
| TMEM106A  | -0.8183813 |
| TMEM106B  | -2.2285304 |
| TMEM106C  | -2.777796  |
| TMEM11    | -0.4298573 |
| TMEM110   | -0.7091379 |
| TMEM115   | -1.2312407 |
| TMEM120A  | -3.6060586 |
| TMEM125   | -0.630825  |
| TMEM126A  | -2.3492503 |
| TMEM126B  | -1.9961586 |
| TMEM129   | -1.4578896 |
| TMEM130   | -1.8861537 |
| TMEM132E  | -6.084711  |
| TMEM134   | -1.4345365 |
| TMEM135   | -2.6761484 |
| TMEM141   | -3.6765285 |
| TMEM143   | -2.2266989 |
| TMEM144   | -3.0923548 |
| TMEM145   | -2.1891732 |
| TMEM147   | -2.5894923 |
| TMEM14A   | -1.0512953 |
| TMEM14C   | -2.3606882 |
| TMEM150A  | -4.445985  |
| TMEM150B  | -1.9579394 |
| TMEM150CC | -2.2623863 |
| TMEM158   | -0.7725306 |
| TMEM160   | -1.0031409 |
| TMEM161A  | -1.1535206 |
| TMEM163   | -1.1720071 |
| TMEM167   | -0.595398  |
| TMEM168   | -0.5103483 |
| TMEM169   | -1.3718395 |
| TMEM170   | -0.7516394 |
| TMEM174   | -0.8071387 |
| TMEM175   | -0.9965143 |
| TMEM176A  | -0.9640341 |
| TMEM176B  | -1.0677972 |
| TMEM177   | -1.3053522 |
| TMEM178B  | -0.6075342 |
| TMEM179   | -0.957011  |
| TMEM179B  | -0.8038836 |
| TMEM18    | -1.5493932 |
| TMEM180   | -1.126111  |

|          |            |
|----------|------------|
| TMEM182  | -1.3637595 |
| TMEM183A | -2.6280055 |
| TMEM184A | -0.6373115 |
| TMEM184C | -0.3223033 |
| TMEM186  | -1.0722084 |
| TMEM19   | -3.006382  |
| TMEM191C | -1.4462368 |
| TMEM192  | -1.1094966 |
| TMEM194  | -0.5050888 |
| TMEM196  | -1.6137302 |
| TMEM198B | -0.579133  |
| TMEM199  | -0.8167841 |
| TMEM200B | -1.3970573 |
| TMEM201  | -1.7461581 |
| TMEM203  | -2.4325404 |
| TMEM205  | -4.658755  |
| TMEM207  | -2.1775243 |
| TMEM208  | -1.2691875 |
| TMEM209  | -0.5757072 |
| TMEM210  | -0.8985348 |
| TMEM214  | -1.3858881 |
| TMEM215  | -0.660666  |
| TMEM217  | -1.5859754 |
| TMEM218  | -1.0083303 |
| TMEM219  | -1.8485246 |
| TMEM220  | -2.870553  |
| TMEM222  | -1.0773525 |
| TMEM223  | -1.4470143 |
| TMEM225  | -2.1016164 |
| TMEM229A | -2.4506114 |
| TMEM230  | -0.7424469 |
| TMEM233  | -1.5912449 |
| TMEM234  | -0.9529791 |
| TMEM235  | -2.0294633 |
| TMEM236  | -2.1451004 |
| TMEM238  | -1.7178657 |
| TMEM239  | -1.5944095 |
| TMEM241  | -1.0522897 |
| TMEM242  | -1.6326823 |
| TMEM248  | -0.9548736 |
| TMEM25   | -5.0536437 |
| TMEM253  | -0.9954889 |
| TMEM254A | -3.6725338 |
| TMEM254C | -3.7959108 |
| TMEM256  | -2.414517  |

|           |            |
|-----------|------------|
| TMEM258   | -0.3220754 |
| TMEM259   | -1.815352  |
| TMEM26    | -0.9028683 |
| TMEM260   | -0.6796012 |
| TMEM261   | -1.378295  |
| TMEM263   | -0.3571701 |
| TMEM27    | -2.1868546 |
| TMEM29    | -1.0009694 |
| TMEM30A   | -0.9368839 |
| TMEM30B   | -2.8384757 |
| TMEM30C   | -1.392261  |
| TMEM33    | -0.4337902 |
| TMEM37    | -2.6284628 |
| TMEM38B   | -1.9500785 |
| TMEM39B   | -0.8410082 |
| TMEM41A   | -1.8572631 |
| TMEM41B   | -0.4910393 |
| TMEM42    | -0.6822009 |
| TMEM45B   | -0.789999  |
| TMEM5     | -1.6226363 |
| TMEM50A   | -1.0532684 |
| TMEM51    | -1.272089  |
| TMEM51OS1 | -0.3345344 |
| TMEM52    | -1.344218  |
| TMEM52B   | -2.203899  |
| TMEM53    | -4.6540318 |
| TMEM55A   | -0.6588459 |
| TMEM55B   | -0.566236  |
| TMEM56    | -3.9725332 |
| TMEM57    | -1.2927694 |
| TMEM59    | -1.4198647 |
| TMEM60    | -1.1463537 |
| TMEM62    | -1.3471417 |
| TMEM63B   | -1.6748447 |
| TMEM64    | -1.5674405 |
| TMEM66    | -0.5518208 |
| TMEM67    | -0.3095272 |
| TMEM69    | -0.8436301 |
| TMEM70    | -2.1199193 |
| TMEM72    | -2.341585  |
| TMEM74    | -2.235807  |
| TMEM74B   | -1.2151589 |
| TMEM8     | -1.0589733 |
| TMEM80    | -0.1536665 |
| TMEM82    | -5.336231  |

|           |            |
|-----------|------------|
| TMEM86A   | -3.1966476 |
| TMEM86B   | -7.306298  |
| TMEM88    | -0.35676   |
| TMEM88B   | -1.9615297 |
| TMEM9     | -2.0628576 |
| TMEM91    | -2.7132697 |
| TMEM92    | -2.0938606 |
| TMEM97    | -4.887149  |
| TMEM98    | -0.5069108 |
| TMIE      | -4.04566   |
| TMIGD1    | -2.1006522 |
| TMLHE     | -1.9924197 |
| TMPRSS11A | -2.3057551 |
| TMPRSS11B | -0.9973946 |
| TMPRSS11C | -2.2149858 |
| TMPRSS11D | -2.0020354 |
| TMPRSS11E | -2.157946  |
| TMPRSS11F | -1.9500186 |
| TMPRSS11G | -2.173762  |
| TMPRSS12  | -1.5076828 |
| TMPRSS2   | -0.1888814 |
| TMPRSS3   | -1.7476907 |
| TMPRSS5   | -2.2082126 |
| TMPRSS6   | -11.628983 |
| TMPRSS7   | -3.2207143 |
| TMSB15A   | -1.8593516 |
| TMSB15B1  | -0.6371563 |
| TMTC2     | -0.7671738 |
| TMTC4     | -1.013041  |
| TMUB1     | -0.6334114 |
| TMUB2     | -1.3596725 |
| TMX1      | -1.0345898 |
| TMX2      | -2.212472  |
| TMX4      | -0.5264659 |
| TNFAIP8L1 | -3.4064093 |
| TNFRSF11B | -3.026513  |
| TNFRSF19  | -0.3936644 |
| TNFRSF1A  | -0.475544  |
| TNFRSF22  | -1.8326552 |
| TNFRSF8   | -1.8031328 |
| TNFRSF9   | -1.6735878 |
| TNFSF12   | -0.2045097 |
| TNFSF13OS | -1.5353954 |
| TNFSF18   | -2.3572698 |
| TNFSF4    | -2.1665342 |



|          |            |
|----------|------------|
| TNK2     | -0.7459879 |
| TNK2OS   | -1.6970062 |
| TNMD     | -2.1252759 |
| TNNI1    | -1.6833286 |
| TNPO1    | -0.3330722 |
| TNPO2    | -1.1702676 |
| TNPO3    | -0.2457619 |
| TOB1     | -2.468052  |
| TOB2     | -1.2285104 |
| TOLLIP   | -0.4969683 |
| TOM1     | -1.0082169 |
| TOM1L1   | -0.469801  |
| TOMM20   | -0.9371114 |
| TOMM22   | -1.0671072 |
| TOMM34   | -0.2337337 |
| TOMM40   | -1.9060907 |
| TOMM40L  | -0.4919438 |
| TOMM5    | -1.1906233 |
| TOMM6    | -1.4164352 |
| TOMM70A  | -1.6865687 |
| TOMT     | -1.5036793 |
| TONSL    | -0.6725674 |
| TOP1MT   | -3.755066  |
| TOP3A    | -0.6408186 |
| TOP3B    | -0.6073418 |
| TOPAZ1   | -1.9515109 |
| TOPORS   | -0.2957163 |
| TOR1A    | -2.1766043 |
| TOR1AIP2 | -1.3668799 |
| TOR1B    | -0.3826771 |
| TOR2A    | -1.8416796 |
| TOX      | -3.0800412 |
| TPBPA    | -2.091243  |
| TPCN1    | -2.246808  |
| TPD52L1  | -4.7650795 |
| TPD52L2  | -0.7190151 |
| TPGS1    | -0.557869  |
| TPGS2    | -0.5829773 |
| TPH2     | -2.2062423 |
| TPI1     | -3.3860784 |
| TPK1     | -1.657448  |
| TPMT     | -6.499669  |
| TPO      | -2.0447176 |
| TPP1     | -1.5275555 |
| TPPP     | -1.7400396 |

|             |            |
|-------------|------------|
| TPPP2       | -1.942399  |
| TPRA1       | -0.9593601 |
| TPRKB       | -1.9353919 |
| TPRN        | -1.0200491 |
| TPSAB1      | -1.6787233 |
| TPST1       | -2.3120391 |
| TPT1        | -1.1533618 |
| TPTE        | -2.0780022 |
| TRABD       | -2.2274103 |
| TRADD       | -1.1289177 |
| TRAF4       | -2.6846051 |
| TRAFD1      | -0.5845275 |
| TRAM1       | -1.8521118 |
| TRAM2       | -0.3099046 |
| TRANK1      | -0.3015719 |
| TRAP1       | -3.3980713 |
| TRAP1A      | -2.0956004 |
| TRAPPC1     | -1.3143029 |
| TRAPPC11    | -0.5576687 |
| TRAPPC12    | -1.4875488 |
| TRAPPC13    | -0.867043  |
| TRAPPC2L    | -0.7042575 |
| TRAPPC3     | -1.5486693 |
| TRAPPC3L    | -2.3213944 |
| TRAPPC5     | -1.4024096 |
| TRAPPC6A    | -1.3570776 |
| TRAV12-1    | -1.6758332 |
| TRAV14D-3-L | -0.7512662 |
| TRAV14N-1   | -2.1891382 |
| TRAV3-4     | -2.7095778 |
| TRAV7N-5    | -2.3066573 |
| TREH        | -2.0786037 |
| TRF         | -4.139343  |
| TRGV2       | -2.082215  |
| TRH         | -1.5507805 |
| TRHDE       | -2.166294  |
| TRHR        | -2.2103128 |
| TRIAP1      | -1.3156266 |
| TRIB3       | -1.2764964 |
| TRIM14      | -2.2098684 |
| TRIM17      | -0.2099974 |
| TRIM2       | -1.6521053 |
| TRIM24      | -1.1678452 |
| TRIM25      | -1.2840571 |
| TRIM26      | -0.4418149 |

|           |            |
|-----------|------------|
| TRIM27    | -0.4032455 |
| TRIM28    | -1.1592779 |
| TRIM31    | -2.040685  |
| TRIM38    | -2.085841  |
| TRIM40    | -0.6176012 |
| TRIM45    | -0.5914917 |
| TRIM52    | -2.080303  |
| TRIM6     | -1.5262532 |
| TRIM60    | -2.1817703 |
| TRIM66    | -1.554261  |
| TRIM67    | -1.83775   |
| TRIM68    | -0.6023688 |
| TRIM7     | -1.2898803 |
| TRIM71    | -1.6583438 |
| TRIM75    | -2.0378692 |
| TRIM9     | -0.5224924 |
| TRIML1    | -2.0650918 |
| TRIP13    | -0.7298346 |
| TRIP4     | -0.2794805 |
| TRIP6     | -0.7159486 |
| TRIT1     | -1.4957438 |
| TRMT1     | -0.5174651 |
| TRMT10A   | -0.9915962 |
| TRMT10B   | -0.2425888 |
| TRMT10C   | -0.7609963 |
| TRMT11    | -1.1990914 |
| TRMT112   | -0.5181723 |
| TRMT12    | -0.9901748 |
| TRMT2B    | -1.4841595 |
| TRMT5     | -1.1567557 |
| TRMT61A   | -0.7275434 |
| TRMT61B   | -0.9359999 |
| TRMU      | -1.7549729 |
| TRNAU1AP  | -1.2108898 |
| TRP53     | -0.3362312 |
| TRP53INP1 | -0.2444949 |
| TRP53INP2 | -1.3606396 |
| TRP53RK   | -0.8139339 |
| TRP53TG5  | -2.0312839 |
| TRP63     | -0.5067587 |
| TRPA1     | -3.7886498 |
| TRPC4     | -2.2977893 |
| TRPC4AP   | -0.9685197 |
| TRPC5     | -1.6896873 |
| TRPC5OS   | -2.454427  |

|         |            |
|---------|------------|
| TRPC7   | -1.9836438 |
| TRPM2   | -0.8984652 |
| TRPM3   | -0.8767991 |
| TRPM4   | -0.4061935 |
| TRPM7   | -0.3051992 |
| TRPM8   | -0.7716074 |
| TRPT1   | -1.0105472 |
| TRPV1   | -3.646786  |
| TRPV3   | -2.1527488 |
| TRPV5   | -2.2577178 |
| TRRAP   | -0.5747733 |
| TRUB1   | -1.4629245 |
| TRUB2   | -1.0784192 |
| TRY5    | -1.7308102 |
| TSC1    | -0.856359  |
| TSC22D2 | -1.8847156 |
| TSC22D4 | -0.2291198 |
| TSEN15  | -0.504631  |
| TSEN2   | -1.8112569 |
| TSEN34  | -1.3710809 |
| TSEN54  | -0.8244023 |
| TSFM    | -1.5497012 |
| TSGA8   | -1.5456929 |
| TSHR    | -2.238247  |
| TSHZ2   | -0.7658567 |
| TSKS    | -0.8491778 |
| TSKU    | -1.4589117 |
| TSN     | -0.7138181 |
| TSNAX   | -0.3456311 |
| TSPAN10 | -2.1407392 |
| TSPAN12 | -3.6375637 |
| TSPAN14 | -0.2036233 |
| TSPAN31 | -2.932405  |
| TSPAN33 | -1.891788  |
| TSPAN4  | -1.9367399 |
| TSPY-PS | -2.0147605 |
| TSR3    | -0.6862912 |
| TSSC1   | -0.4412723 |
| TSSC4   | -1.0737119 |
| TSSK1   | -1.590992  |
| TSSK2   | -2.353858  |
| TSSK3   | -1.0533361 |
| TSSK5   | -1.6341002 |
| TSSK6   | -0.1744232 |
| TST     | -4.103867  |

|            |            |
|------------|------------|
| TSTA3      | -2.0706544 |
| TSTD1      | -4.79099   |
| TSTD3      | -3.4897017 |
| TTBK1      | -3.3932247 |
| TTC1       | -0.6975021 |
| TTC13      | -1.1599722 |
| TTC17      | -0.4805236 |
| TTC19      | -1.2129679 |
| TTC23      | -3.6458483 |
| TTC24      | -1.616416  |
| TTC27      | -0.7549367 |
| TTC3       | -0.3381944 |
| TTC30A2    | -0.3444905 |
| TTC30B     | -0.4641595 |
| TTC32      | -1.6218748 |
| TTC33      | -0.591785  |
| TTC36      | -8.186899  |
| TTC37      | -0.5709403 |
| TTC38      | -0.6192064 |
| TTC39A     | -2.208074  |
| TTC39C     | -3.891437  |
| TTC4       | -0.9702268 |
| TTC7       | -1.2103033 |
| TTC9B      | -1.7976747 |
| TTF1       | -2.2838855 |
| TTF2       | -0.2654643 |
| TTI1       | -0.1658697 |
| TTI2       | -0.3654475 |
| TTK        | -0.6288858 |
| TTLL12     | -1.492661  |
| TTLL13     | -2.0642478 |
| TTLL4      | -0.2036252 |
| TTLL5      | -0.8420298 |
| TTLL8      | -1.8398116 |
| TTPA       | -6.529095  |
| TTR        | -12.372901 |
| TTYH1      | -0.2299264 |
| TTYH2      | -4.3676734 |
| TUB        | -0.269084  |
| TUBA1C     | -1.2533875 |
| TUBA3A     | -0.41927   |
| TUBA4A     | -1.3239207 |
| TUBB2A     | -1.7843795 |
| TUBB2A-PS2 | -0.8625832 |
| TUBB3      | -0.6643603 |

|         |            |
|---------|------------|
| TUBD1   | -0.7796578 |
| TUBE1   | -0.5590286 |
| TUBG1   | -2.456194  |
| TUBGCP2 | -1.0512652 |
| TUBGCP6 | -0.535378  |
| TUFM    | -2.410985  |
| TUG1    | -0.2091408 |
| TULP2   | -1.9238961 |
| TUNAR   | -2.0895898 |
| TUSC2   | -2.2876635 |
| TUT1    | -0.5257564 |
| TVP23A  | -0.9283068 |
| TVP23B  | -0.2775993 |
| TWF1    | -0.8702416 |
| TWISTNB | -0.3299189 |
| TXLNA   | -0.1497517 |
| TXN1    | -0.4858561 |
| TXN2    | -2.4535813 |
| TXNDC11 | -0.3848062 |
| TXNDC12 | -1.3465147 |
| TXNDC15 | -1.5117893 |
| TXNDC17 | -0.866703  |
| TXNDC2  | -0.1867464 |
| TXNDC5  | -2.4578595 |
| TXNDC9  | -0.2703924 |
| TXNL1   | -0.5779314 |
| TXNL4A  | -0.9236746 |
| TXNL4B  | -0.8691745 |
| TXNRD1  | -0.7218471 |
| TXNRD2  | -2.753086  |
| TYK2    | -0.2356324 |
| TYMP    | -4.723894  |
| TYMS-PS | -1.2418885 |
| TYRP1   | -2.189136  |
| TYSND1  | -2.694429  |
| TYW1    | -1.5284333 |
| TYW5    | -0.4523716 |
| U2AF1L4 | -0.4314432 |
| UAP1L1  | -1.226069  |
| UBA1    | -0.9540954 |
| UBA3    | -0.3777599 |
| UBA5    | -0.427084  |
| UBA52   | -1.1914201 |
| UBA7    | -0.2074852 |
| UBAC1   | -1.0983849 |

|          |            |
|----------|------------|
| UBAC2    | -1.3376708 |
| UBALD1   | -0.3954263 |
| UBAP1    | -0.9150848 |
| UBAP2L   | -0.3048892 |
| UBB      | -0.2949853 |
| UBC      | -0.9316354 |
| UBE2A    | -0.3598299 |
| UBE2CBP  | -2.861772  |
| UBE2D2B  | -1.7237389 |
| UBE2D3   | -0.4224095 |
| UBE2DNL1 | -2.364461  |
| UBE2DNL2 | -2.0797408 |
| UBE2E1   | -0.2297087 |
| UBE2E2   | -1.5881348 |
| UBE2E3   | -0.6887875 |
| UBE2G1   | -1.5868702 |
| UBE2J1   | -0.4325895 |
| UBE2J2   | -0.5966463 |
| UBE2K    | -0.4207301 |
| UBE2L3   | -0.7552905 |
| UBE2L6   | -1.220367  |
| UBE2M    | -1.3552299 |
| UBE2QL1  | -2.4340858 |
| UBE2T    | -0.9421539 |
| UBE2U    | -2.860798  |
| UBE2V1   | -0.9729924 |
| UBE2W    | -0.1452937 |
| UBE2Z    | -0.5952377 |
| UBE3B    | -1.1180787 |
| UBE3C    | -0.6457229 |
| UBE4A    | -1.5439157 |
| UBE4B    | -1.1070476 |
| UBFD1    | -0.2468076 |
| UBIAD1   | -1.4844441 |
| UBL4     | -1.1209173 |
| UBL5     | -0.6685123 |
| UBL7     | -0.9108586 |
| UBLCP1   | -0.4256549 |
| UBQLN3   | -1.893249  |
| UBQLN4   | -1.330374  |
| UBR2     | -0.7297654 |
| UBR3     | -1.0855029 |
| UBR4     | -0.24124   |
| UBR7     | -0.2406097 |
| UBTD1    | -0.5619721 |

|           |            |
|-----------|------------|
| UBTF      | -1.677485  |
| UBTFL1    | -2.063945  |
| UBXN1     | -2.1742907 |
| UBXN4     | -2.0325582 |
| UBXN6     | -1.7320218 |
| UBXN8     | -1.3742499 |
| UCHL3     | -0.3441031 |
| UCHL4     | -1.4308238 |
| UCK1      | -1.8332582 |
| UCKL1     | -0.5763788 |
| UCN       | -2.2716687 |
| UCN2      | -1.656981  |
| UCN3      | -4.0662107 |
| UEVLD     | -0.8233745 |
| UFC1      | -1.8449855 |
| UFD1L     | -0.4559526 |
| UFL1      | -0.5075851 |
| UFM1      | -0.4410939 |
| UFSP1     | -1.7356482 |
| UFSP2     | -1.3337688 |
| UGDH      | -2.1553836 |
| UGGT1     | -0.4565568 |
| UGP2      | -3.3607173 |
| UGT1A10   | -6.4590373 |
| UGT1A6A   | -1.5113678 |
| UGT1A6B   | -4.4743347 |
| UGT2A3    | -11.33696  |
| UGT2B1    | -11.440434 |
| UGT2B34   | -13.162479 |
| UGT2B35   | -10.192818 |
| UGT2B36   | -12.918097 |
| UGT2B37   | -10.711073 |
| UGT2B38   | -13.963238 |
| UGT2B5    | -12.63341  |
| UGT3A1    | -8.676649  |
| UGT3A2    | -11.784775 |
| UHRF1BP1  | -1.3576927 |
| UHRF1BP1L | -0.8716722 |
| UHRF2     | -0.4483781 |
| ULK1      | -0.7437286 |
| ULK2      | -0.8476691 |
| ULK3      | -0.8250203 |
| UMOD      | -2.0939946 |
| UMODL1    | -2.2905064 |
| UMPS      | -2.392107  |



|          |            |
|----------|------------|
| UNC119   | -0.7704902 |
| UNC119B  | -1.2064905 |
| UNC13A   | -1.1417427 |
| UNC13C   | -2.1118212 |
| UNC45BOS | -1.0866711 |
| UNC50    | -0.7932839 |
| UNC5A    | -2.6782131 |
| UNC5D    | -1.4364128 |
| UNC80    | -2.2351515 |
| UNC93A   | -5.8153343 |
| UNC93B1  | -1.0858288 |
| UNCX     | -2.3221607 |
| UNG      | -1.6796169 |
| UOX      | -12.002151 |
| UPB1     | -9.420951  |
| UPF1     | -1.6458712 |
| UPP2     | -10.009712 |
| UQCC1    | -1.9456024 |
| UQCC2    | -1.4114175 |
| UQCR10   | -2.2673717 |
| UQCR11   | -2.731317  |
| UQCRB    | -1.5375466 |
| UQCRC1   | -3.2005954 |
| UQCRC2   | -2.1954222 |
| UQCRFS1  | -2.1278405 |
| UQCRH    | -2.144607  |
| UQCRQ    | -2.771696  |
| URAD     | -3.5415788 |
| URAH     | -5.5308022 |
| URGCP    | -1.1201539 |
| URI1     | -0.7548819 |
| URM1     | -0.9765592 |
| UROC1    | -13.484917 |
| UROD     | -2.789072  |
| UROS     | -1.941205  |
| USB1     | -0.5046926 |
| USE1     | -0.5079379 |
| USF2     | -1.5088859 |
| USH1C    | -1.6683123 |
| USH1G    | -1.6331072 |
| USHBP1   | -0.3493519 |
| USMG2    | -2.0767126 |
| USMG5    | -1.8283706 |
| USO1     | -0.5802698 |
| USP10    | -1.6387267 |

|         |            |
|---------|------------|
| USP12   | -0.5070686 |
| USP14   | -0.9202633 |
| USP17LA | -1.5308836 |
| USP17LB | -2.0864117 |
| USP17LC | -2.7460923 |
| USP17LD | -1.3651514 |
| USP19   | -0.9127469 |
| USP2    | -2.3281384 |
| USP20   | -0.1881909 |
| USP21   | -1.2529278 |
| USP22   | -0.3191259 |
| USP26   | -1.6248884 |
| USP28   | -0.76965   |
| USP29   | -2.170848  |
| USP3    | -0.4593711 |
| USP30   | -1.2888126 |
| USP38   | -1.2496705 |
| USP4    | -0.4671435 |
| USP40   | -1.2442718 |
| USP44   | -1.7008111 |
| USP45   | -0.4210091 |
| USP46   | -0.3239942 |
| USP5    | -1.4404206 |
| USP50   | -1.7124529 |
| USP51   | -1.6786952 |
| USP9Y   | -1.5972502 |
| UTP18   | -2.0744932 |
| UTS2    | -2.0179563 |
| UTS2B   | -2.2273824 |
| UVRAG   | -0.7591806 |
| UVSSA   | -0.507416  |
| UXS1    | -0.5630436 |
| UXT     | -1.338151  |
| V1RD19  | -2.3065703 |
| VAC14   | -1.8494496 |
| VAMP1   | -0.8439338 |
| VAMP7   | -1.1825724 |
| VAMP8   | -0.6357145 |
| VAPB    | -1.4455256 |
| VARS    | -1.2225204 |
| VARS2   | -0.4375873 |
| VASH1   | -0.8233476 |
| VASH2   | -2.073277  |
| VAT1    | -1.733428  |
| VAV2    | -1.35674   |

|          |            |
|----------|------------|
| VAX1     | -1.5520833 |
| VAX2     | -3.0007663 |
| VCP      | -1.1398673 |
| VCPKMT   | -0.9980459 |
| VDAC1    | -2.0392509 |
| VDAC2    | -0.7637272 |
| VDAC3    | -1.1323752 |
| VEGFB    | -1.6698217 |
| VEGFC    | -0.1785994 |
| VEZT     | -0.2643001 |
| VGLL2    | -1.8051105 |
| VHL      | -0.7189674 |
| VIL1     | -2.0132854 |
| VIMP     | -0.6607537 |
| VIPAS39  | -0.3096471 |
| VIPR1    | -5.050625  |
| VKORC1   | -4.442275  |
| VKORC1L1 | -0.8872027 |
| VMA21    | -1.0371656 |
| VMAC     | -2.4186044 |
| VMN1R1   | -2.2640376 |
| VMN1R10  | -2.0998707 |
| VMN1R101 | -1.6378617 |
| VMN1R104 | -2.4432576 |
| VMN1R11  | -2.0419734 |
| VMN1R114 | -1.9344964 |
| VMN1R118 | -2.3304617 |
| VMN1R12  | -2.089024  |
| VMN1R121 | -2.1532679 |
| VMN1R122 | -2.105537  |
| VMN1R124 | -2.0291455 |
| VMN1R131 | -2.3429437 |
| VMN1R139 | -1.8688757 |
| VMN1R14  | -2.1725423 |
| VMN1R15  | -1.8331676 |
| VMN1R151 | -1.9929783 |
| VMN1R157 | -2.269679  |
| VMN1R167 | -2.0621443 |
| VMN1R169 | -2.0991871 |
| VMN1R170 | -2.2221112 |
| VMN1R172 | -1.9712842 |
| VMN1R173 | -0.1870174 |
| VMN1R174 | -2.085403  |
| VMN1R175 | -2.0005634 |
| VMN1R176 | -2.2064888 |

|            |            |
|------------|------------|
| VMN1R178   | -1.3335364 |
| VMN1R179   | -2.118021  |
| VMN1R18    | -2.1777713 |
| VMN1R180   | -2.2355106 |
| VMN1R181   | -2.1442218 |
| VMN1R183   | -1.9701023 |
| VMN1R185   | -2.0756743 |
| VMN1R186   | -2.1955702 |
| VMN1R188   | -1.9944689 |
| VMN1R189   | -2.103116  |
| VMN1R19    | -2.0757728 |
| VMN1R191   | -2.3461525 |
| VMN1R192   | -3.9023175 |
| VMN1R193   | -2.3020606 |
| VMN1R194   | -1.7086945 |
| VMN1R196   | -2.2319527 |
| VMN1R198   | -2.092874  |
| VMN1R199   | -1.8867745 |
| VMN1R2     | -2.1654942 |
| VMN1R20    | -2.35844   |
| VMN1R200   | -2.1499755 |
| VMN1R201   | -2.0520263 |
| VMN1R202   | -2.1144938 |
| VMN1R203   | -2.2985756 |
| VMN1R205   | -2.001218  |
| VMN1R206   | -1.8691566 |
| VMN1R207-F | -2.1624908 |
| VMN1R208   | -2.1037729 |
| VMN1R209   | -1.9383266 |
| VMN1R21    | -2.1164527 |
| VMN1R210   | -2.3640997 |
| VMN1R211   | -2.2409384 |
| VMN1R212   | -2.2981148 |
| VMN1R213   | -2.1829844 |
| VMN1R214   | -2.0529804 |
| VMN1R215   | -2.0803454 |
| VMN1R216   | -1.6653073 |
| VMN1R217   | -0.3883262 |
| VMN1R218   | -1.9951534 |
| VMN1R220   | -3.1065767 |
| VMN1R222   | -2.1021757 |
| VMN1R223   | -2.3720543 |
| VMN1R224   | -1.8051031 |
| VMN1R226   | -2.1346297 |
| VMN1R227   | -2.2286682 |

|          |            |
|----------|------------|
| VMN1R228 | -2.2999232 |
| VMN1R229 | -1.999409  |
| VMN1R23  | -2.2027955 |
| VMN1R230 | -2.1665907 |
| VMN1R232 | -2.0122023 |
| VMN1R233 | -2.1322722 |
| VMN1R234 | -1.7053227 |
| VMN1R235 | -1.8784411 |
| VMN1R236 | -2.232326  |
| VMN1R237 | -2.217785  |
| VMN1R24  | -2.0226555 |
| VMN1R25  | -0.9267995 |
| VMN1R26  | -2.2444897 |
| VMN1R27  | -1.968569  |
| VMN1R29  | -2.1619024 |
| VMN1R30  | -1.5096471 |
| VMN1R31  | -2.1918237 |
| VMN1R32  | -2.0645926 |
| VMN1R33  | -3.4616244 |
| VMN1R35  | -1.9578538 |
| VMN1R36  | -2.2526937 |
| VMN1R38  | -2.163139  |
| VMN1R39  | -2.0884938 |
| VMN1R4   | -4.758087  |
| VMN1R40  | -1.9697521 |
| VMN1R42  | -2.2120216 |
| VMN1R43  | -1.9990513 |
| VMN1R44  | -2.078399  |
| VMN1R45  | -2.2146811 |
| VMN1R46  | -2.101249  |
| VMN1R47  | -2.1046298 |
| VMN1R48  | -4.894624  |
| VMN1R49  | -2.1062174 |
| VMN1R5   | -2.2394705 |
| VMN1R50  | -2.0087807 |
| VMN1R51  | -1.6814163 |
| VMN1R53  | -3.9109225 |
| VMN1R54  | -1.9930251 |
| VMN1R55  | -2.2695577 |
| VMN1R56  | -3.1467044 |
| VMN1R57  | -2.2016957 |
| VMN1R6   | -2.1174307 |
| VMN1R61  | -2.0986304 |
| VMN1R62  | -1.6526256 |
| VMN1R64  | -2.2977018 |

|            |            |
|------------|------------|
| VMN1R65    | -1.5083537 |
| VMN1R67    | -2.1992507 |
| VMN1R68    | -2.103878  |
| VMN1R69    | -2.0962925 |
| VMN1R7     | -2.0961258 |
| VMN1R71    | -2.0988662 |
| VMN1R72    | -1.6966665 |
| VMN1R73    | -2.1999977 |
| VMN1R74    | -1.9630423 |
| VMN1R75    | -2.176549  |
| VMN1R76    | -0.7204421 |
| VMN1R77    | -2.3465874 |
| VMN1R78    | -2.1800385 |
| VMN1R8     | -2.1843548 |
| VMN1R80    | -1.9281492 |
| VMN1R81    | -2.2158651 |
| VMN1R82    | -2.1577575 |
| VMN1R83    | -2.3055656 |
| VMN1R84    | -2.357986  |
| VMN1R85    | -2.1834097 |
| VMN1R86    | -2.3016171 |
| VMN1R89    | -2.012033  |
| VMN1R9     | -2.0846722 |
| VMN1R-PS1C | -2.3699367 |
| VMN1R-PS7S | -2.6314201 |
| VMN2R1     | -4.121313  |
| VMN2R10    | -1.919497  |
| VMN2R100   | -2.1454756 |
| VMN2R101   | -1.8266737 |
| VMN2R102   | -1.938642  |
| VMN2R103   | -2.112272  |
| VMN2R104   | -1.6257505 |
| VMN2R105   | -2.0159323 |
| VMN2R106   | -2.2214096 |
| VMN2R107   | -2.2621174 |
| VMN2R108   | -2.3525624 |
| VMN2R109   | -2.0126908 |
| VMN2R110   | -2.204371  |
| VMN2R111   | -1.7077546 |
| VMN2R112   | -2.1492054 |
| VMN2R113   | -0.7150559 |
| VMN2R114   | -1.5510726 |
| VMN2R115   | -1.7202742 |
| VMN2R116   | -3.1261868 |
| VMN2R118   | -2.2251685 |

|          |            |
|----------|------------|
| VMN2R12  | -1.2075891 |
| VMN2R120 | -2.613603  |
| VMN2R123 | -2.1689985 |
| VMN2R15  | -2.0141845 |
| VMN2R16  | -1.8551788 |
| VMN2R17  | -2.3184485 |
| VMN2R19  | -1.8527789 |
| VMN2R20  | -1.5744402 |
| VMN2R23  | -2.0739357 |
| VMN2R24  | -2.3587308 |
| VMN2R25  | -2.110761  |
| VMN2R26  | -2.1381152 |
| VMN2R27  | -1.6050208 |
| VMN2R28  | -2.1639504 |
| VMN2R29  | -0.659483  |
| VMN2R3   | -1.2310214 |
| VMN2R34  | -2.066808  |
| VMN2R35  | -0.8787265 |
| VMN2R37  | -2.078759  |
| VMN2R39  | -2.0909207 |
| VMN2R4   | -1.0404937 |
| VMN2R42  | -2.33106   |
| VMN2R48  | -2.1424685 |
| VMN2R49  | -2.205579  |
| VMN2R5   | -1.9539685 |
| VMN2R53  | -2.1050012 |
| VMN2R54  | -1.4327984 |
| VMN2R56  | -2.3573422 |
| VMN2R57  | -2.0777605 |
| VMN2R58  | -1.874095  |
| VMN2R59  | -3.0351768 |
| VMN2R61  | -2.0812418 |
| VMN2R65  | -2.1647396 |
| VMN2R66  | -2.2264762 |
| VMN2R67  | -2.3971725 |
| VMN2R68  | -2.166345  |
| VMN2R69  | -2.1053011 |
| VMN2R70  | -2.00355   |
| VMN2R71  | -2.064157  |
| VMN2R72  | -2.3015683 |
| VMN2R73  | -2.032014  |
| VMN2R75  | -2.187666  |
| VMN2R76  | -2.046995  |
| VMN2R77  | -1.9395249 |
| VMN2R78  | -2.0255895 |

|            |            |
|------------|------------|
| VMN2R81    | -1.7499187 |
| VMN2R82    | -1.9469011 |
| VMN2R83    | -2.070397  |
| VMN2R85    | -0.5502026 |
| VMN2R86    | -1.9718719 |
| VMN2R89    | -1.7995052 |
| VMN2R90    | -1.9425337 |
| VMN2R91    | -2.130336  |
| VMN2R94    | -2.5148544 |
| VMN2R96    | -0.930203  |
| VMN2R97    | -0.7353323 |
| VMN2R98    | -2.0027003 |
| VMN2R99    | -1.9493995 |
| VMN2R-PS1C | -2.0908184 |
| VMN2R-PS12 | -1.5584645 |
| VMN2R-PS54 | -2.2944613 |
| VMN2R-PS57 | -2.3407593 |
| VMO1       | -6.08047   |
| VNN1       | -2.9512897 |
| VNN3       | -5.2403646 |
| VPREB2     | -1.9114654 |
| VPS11      | -1.0286283 |
| VPS13D     | -0.6098046 |
| VPS16      | -0.1911259 |
| VPS18      | -0.5452371 |
| VPS25      | -1.9740362 |
| VPS26A     | -0.5178204 |
| VPS26B     | -1.1960621 |
| VPS28      | -0.3248873 |
| VPS29      | -0.4118385 |
| VPS33A     | -0.6792216 |
| VPS35      | -0.525743  |
| VPS37A     | -0.2684603 |
| VPS37B     | -1.8535099 |
| VPS41      | -1.6588402 |
| VPS45      | -1.2778826 |
| VPS52      | -0.2918634 |
| VPS9D1     | -0.8366585 |
| VRK2       | -0.5338378 |
| VRK3       | -0.5413985 |
| VRTN       | -1.8078299 |
| VSIG1      | -3.4147341 |
| VSIG4      | -8.815109  |
| VSTM2B     | -2.3134797 |
| VSTM2L     | -0.6905251 |



|         |            |
|---------|------------|
| VSTM5   | -2.425157  |
| VSX1    | -1.6873162 |
| VSX2    | -1.9487805 |
| VTA1    | -0.5253792 |
| VTCN1   | -1.6009307 |
| VTI1A   | -0.1927519 |
| VTN     | -9.47217   |
| VWA2    | -2.0508358 |
| VWA5B2  | -1.7841437 |
| VWA7    | -1.3496556 |
| VWA8    | -3.3701515 |
| VWC2    | -2.0019593 |
| VWC2L   | -2.2299643 |
| VWCE    | -9.233886  |
| VWDE    | -3.5222046 |
| WAP     | -1.6624382 |
| WASF1   | -1.7500365 |
| WASH    | -0.9596019 |
| WBP1    | -1.4730754 |
| WBP1L   | -2.448358  |
| WBP2    | -0.5016947 |
| WBP2NL  | -2.1613555 |
| WBP4    | -0.3904815 |
| WBSCR16 | -2.1872463 |
| WBSCR22 | -0.6644068 |
| WBSCR27 | -2.885964  |
| WBSCR28 | -1.5777588 |
| WDFY2   | -0.4317398 |
| WDR11   | -0.9835622 |
| WDR12   | -1.2505698 |
| WDR17   | -1.3608489 |
| WDR18   | -2.6059566 |
| WDR20   | -0.5178275 |
| WDR24   | -2.0141778 |
| WDR25   | -2.0945106 |
| WDR26   | -0.427681  |
| WDR31   | -0.7962885 |
| WDR33   | -0.6626654 |
| WDR34   | -1.5271077 |
| WDR36   | -0.8209744 |
| WDR4    | -0.8289022 |
| WDR41   | -0.686892  |
| WDR46   | -0.7014847 |
| WDR5    | -1.4433155 |
| WDR53   | -0.7147908 |

|         |            |
|---------|------------|
| WDR55   | -1.0769773 |
| WDR59   | -0.1844192 |
| WDR6    | -0.5851259 |
| WDR61   | -1.6928654 |
| WDR62   | -0.4440498 |
| WDR64   | -1.5951304 |
| WDR72   | -3.0547738 |
| WDR73   | -1.3212762 |
| WDR74   | -1.2688112 |
| WDR77   | -0.4631691 |
| WDR81   | -1.5348539 |
| WDR82   | -0.5369916 |
| WDR83   | -1.3496332 |
| WDR83OS | -1.4057832 |
| WDR86   | -0.3127954 |
| WDR88   | -2.059218  |
| WDR89   | -1.660542  |
| WDR90   | -1.0245733 |
| WDR91   | -1.064188  |
| WDR93   | -0.3990514 |
| WDTC1   | -1.4606261 |
| WDYHV1  | -0.2021337 |
| WEE1    | -0.4073134 |
| WFDC1   | -0.4863057 |
| WFDC11  | -2.1911395 |
| WFDC13  | -1.8511736 |
| WFDC15A | -2.5039413 |
| WFDC15B | -1.589474  |
| WFDC16  | -1.6476195 |
| WFDC5   | -1.9210684 |
| WFDC8   | -1.0027189 |
| WFDC9   | -2.2545288 |
| WFIKKN1 | -0.7820575 |
| WFS1    | -0.3098297 |
| WHAMM   | -1.0602369 |
| WIBG    | -1.5614192 |
| WIPF3   | -0.2806621 |
| WIPI1   | -0.810019  |
| WIPI2   | -1.3269606 |
| WISP1   | -1.066695  |
| WNK3    | -1.9636915 |
| WNT10A  | -1.218471  |
| WNT2    | -1.929167  |
| WNT2B   | -2.0054154 |
| WNT3    | -2.0748198 |

|          |            |
|----------|------------|
| WNT3A    | -2.0209248 |
| WNT5A    | -0.4997506 |
| WNT5B    | -2.0871263 |
| WNT8A    | -1.7770698 |
| WNT8B    | -3.4001427 |
| WNT9B    | -4.940209  |
| WRAP53   | -0.7400746 |
| WRAP73   | -1.0809879 |
| WRNIP1   | -1.6069417 |
| WSB2     | -0.4232073 |
| WT10S    | -1.8872132 |
| WWOX     | -1.3864679 |
| WWP1     | -0.6664829 |
| WWP2     | -0.2554622 |
| XAB2     | -0.4721389 |
| XIRP2    | -1.2659855 |
| XIST     | -0.5683818 |
| XK       | -1.6527803 |
| XKR4     | -1.8239782 |
| XKR5     | -1.5058196 |
| XKR6     | -0.9997654 |
| XKR7     | -1.7973325 |
| XKR8     | -1.0019593 |
| XKR9     | -6.71898   |
| XLR3A    | -1.5202668 |
| XLR5A    | -1.9923754 |
| XLR5B    | -2.6702762 |
| XNDC1    | -1.4119284 |
| XPA      | -1.0578389 |
| XPC      | -0.6905618 |
| XPNPEP1  | -0.2163568 |
| XPO5     | -0.7060151 |
| XPO6     | -0.3327055 |
| XPOT     | -1.2747598 |
| XPR1     | -0.3215194 |
| XRCC2    | -0.9667103 |
| XRCC3    | -3.0566013 |
| XRCC4    | -0.5200682 |
| XRCC5    | -1.3504605 |
| XRCC6    | -1.6231008 |
| XRCC6BP1 | -2.7655826 |
| XRN2     | -0.2937179 |
| XYLB     | -5.6499414 |
| XYLT2    | -2.1366425 |
| YAF2     | -0.574182  |

|         |            |
|---------|------------|
| YARS2   | -1.9463263 |
| YBEY    | -1.152843  |
| YBX1    | -0.2717691 |
| YEATS2  | -0.3348069 |
| YIF1A   | -2.7935772 |
| YIF1B   | -1.5899086 |
| YIPF1   | -0.8896875 |
| YIPF2   | -1.9183106 |
| YIPF3   | -1.6420126 |
| YIPF4   | -0.6218104 |
| YIPF5   | -0.8830195 |
| YKT6    | -0.6372681 |
| YLPM1   | -0.9899051 |
| YME1L1  | -0.8201284 |
| YOD1    | -0.4722948 |
| YPEL1   | -0.2904096 |
| YPEL2   | -1.8760021 |
| YPEL3   | -0.8732934 |
| YPEL5   | -0.9146938 |
| YRDC    | -0.5472302 |
| YWHAG   | -0.9000545 |
| ZADH2   | -1.7462726 |
| ZAR1L   | -2.2253802 |
| ZBED5   | -1.621037  |
| ZBTB17  | -2.097686  |
| ZBTB18  | -0.8586807 |
| ZBTB20  | -0.6243739 |
| ZBTB22  | -0.3164382 |
| ZBTB39  | -0.5412283 |
| ZBTB43  | -0.2423415 |
| ZBTB44  | -1.0551977 |
| ZBTB48  | -2.0820727 |
| ZBTB7B  | -0.9698691 |
| ZBTB7C  | -1.1691971 |
| ZBTB8A  | -0.9870815 |
| ZBTB8OS | -1.3184862 |
| ZBTBD6  | -0.5129643 |
| ZC2HC1B | -2.9536154 |
| ZC2HC1C | -2.0436425 |
| ZC3H12B | -0.4925139 |
| ZC3H14  | -0.7836776 |
| ZC3H7B  | -0.6348105 |
| ZC3H8   | -1.2155328 |
| ZC3HC1  | -0.8470326 |
| ZC4H2   | -1.0491476 |

|           |            |
|-----------|------------|
| ZCCHC16   | -2.109677  |
| ZCCHC17   | -0.5553765 |
| ZCCHC24   | -1.7776446 |
| ZCCHC4    | -0.4574907 |
| ZCCHC5    | -2.4479365 |
| ZCCHC9    | -1.5941243 |
| ZCWPW1    | -1.1927714 |
| ZDBF2     | -1.5415289 |
| ZDHHC11   | -2.483378  |
| ZDHHC12   | -1.9043341 |
| ZDHHC14   | -1.1434109 |
| ZDHHC15   | -0.4667559 |
| ZDHHC16   | -0.3037224 |
| ZDHHC19   | -2.159614  |
| ZDHHC24   | -0.2423201 |
| ZDHHC25   | -1.6266751 |
| ZDHHC4    | -1.2070563 |
| ZDHHC5    | -0.3343368 |
| ZDHHC6    | -2.037056  |
| ZDHHC7    | -0.4866099 |
| ZDHHC9    | -2.7235036 |
| ZER1      | -1.1134386 |
| ZFAND1    | -1.9123216 |
| ZFAND2B   | -1.4277554 |
| ZFAND3    | -0.4597039 |
| ZFAND4    | -2.5764458 |
| ZFC3H1    | -0.2885985 |
| ZFHX2OS   | -2.6853724 |
| ZFHX4     | -4.148108  |
| ZFP108    | -0.6348832 |
| ZFP109    | -2.0875058 |
| ZFP113    | -1.1541348 |
| ZFP119B   | -0.4895716 |
| ZFP128    | -0.3706222 |
| ZFP13     | -2.3078415 |
| ZFP133-PS | -1.6384463 |
| ZFP174    | -1.8609262 |
| ZFP189    | -0.737782  |
| ZFP191    | -0.6739688 |
| ZFP213    | -1.0341272 |
| ZFP219    | -0.5864759 |
| ZFP229    | -0.3057399 |
| ZFP239    | -0.430361  |
| ZFP264    | -4.3309984 |
| ZFP27     | -0.7042007 |

|          |            |
|----------|------------|
| ZFP273   | -0.4568176 |
| ZFP276   | -0.3355064 |
| ZFP277   | -0.8638692 |
| ZFP280B  | -0.6852684 |
| ZFP282   | -1.9311895 |
| ZFP286IT | -2.2264013 |
| ZFP30    | -0.626811  |
| ZFP300   | -2.3369513 |
| ZFP316   | -0.8915367 |
| ZFP318   | -0.8098626 |
| ZFP334   | -2.676332  |
| ZFP335   | -0.4920969 |
| ZFP335OS | -1.1755371 |
| ZFP345   | -0.803503  |
| ZFP35    | -0.2174745 |
| ZFP354A  | -0.7636831 |
| ZFP354B  | -1.8200457 |
| ZFP362   | -0.4069452 |
| ZFP367   | -0.5425644 |
| ZFP369   | -0.3185177 |
| ZFP36L2  | -0.4233007 |
| ZFP385A  | -2.0363443 |
| ZFP385B  | -3.4190063 |
| ZFP385C  | -1.2500377 |
| ZFP39    | -0.8928077 |
| ZFP395   | -2.9378543 |
| ZFP398   | -0.7011764 |
| ZFP408   | -0.3867636 |
| ZFP41    | -1.2538953 |
| ZFP42    | -0.9099731 |
| ZFP422   | -0.5224519 |
| ZFP428   | -0.7873032 |
| ZFP442   | -0.7423773 |
| ZFP444   | -1.6212225 |
| ZFP454   | -1.8443699 |
| ZFP467   | -1.0188451 |
| ZFP488   | -0.5188355 |
| ZFP507   | -0.4479985 |
| ZFP523   | -0.3428173 |
| ZFP524   | -1.421782  |
| ZFP541   | -2.2115486 |
| ZFP57    | -0.2807157 |
| ZFP574   | -0.6378546 |
| ZFP575   | -2.052707  |
| ZFP598   | -0.9288573 |

|         |            |
|---------|------------|
| ZFP60   | -0.6793742 |
| ZFP606  | -0.2668741 |
| ZFP612  | -0.535677  |
| ZFP616  | -2.0541608 |
| ZFP617  | -0.7045302 |
| ZFP618  | -1.5595565 |
| ZFP622  | -0.3342876 |
| ZFP623  | -1.8805859 |
| ZFP628  | -1.1452703 |
| ZFP629  | -0.6264653 |
| ZFP637  | -0.9660606 |
| ZFP639  | -0.59869   |
| ZFP64   | -0.5537915 |
| ZFP646  | -0.4508781 |
| ZFP648  | -1.175096  |
| ZFP655  | -0.3077436 |
| ZFP661  | -1.531465  |
| ZFP672  | -0.3703218 |
| ZFP688  | -0.9467773 |
| ZFP689  | -0.2033453 |
| ZFP691  | -1.1775308 |
| ZFP692  | -0.4538765 |
| ZFP706  | -0.7077961 |
| ZFP707  | -2.857219  |
| ZFP72   | -0.8430584 |
| ZFP735  | -2.0893195 |
| ZFP746  | -0.45824   |
| ZFP750  | -3.3303027 |
| ZFP759  | -1.5707045 |
| ZFP760  | -0.3274958 |
| ZFP768  | -1.1590996 |
| ZFP770  | -0.828011  |
| ZFP771  | -1.9913363 |
| ZFP775  | -0.337358  |
| ZFP784  | -1.1756263 |
| ZFP786  | -2.3038135 |
| ZFP787  | -2.3132215 |
| ZFP791  | -2.0109606 |
| ZFP799  | -1.100539  |
| ZFP804A | -2.0207877 |
| ZFP810  | -0.2458282 |
| ZFP820  | -1.0259871 |
| ZFP825  | -1.4899287 |
| ZFP846  | -0.9650834 |
| ZFP85   | -0.9358728 |

|         |            |
|---------|------------|
| ZFP853  | -1.6564243 |
| ZFP850S | -1.590457  |
| ZFP872  | -1.7565219 |
| ZFP873  | -0.9641297 |
| ZFP874A | -1.7085223 |
| ZFP879  | -0.8120995 |
| ZFP91   | -0.3795171 |
| ZFP932  | -0.228456  |
| ZFP936  | -0.7976253 |
| ZFP938  | -0.5493968 |
| ZFP939  | -1.2747278 |
| ZFP94   | -0.6665576 |
| ZFP940  | -0.9361675 |
| ZFP941  | -1.954906  |
| ZFP944  | -0.6569002 |
| ZFP946  | -1.7255859 |
| ZFP949  | -0.8253455 |
| ZFP951  | -0.5715411 |
| ZFP953  | -1.0004697 |
| ZFP954  | -0.1866512 |
| ZFP955A | -0.6247988 |
| ZFP955B | -0.5989432 |
| ZFP956  | -0.522934  |
| ZFP958  | -0.7302382 |
| ZFP960  | -0.2733545 |
| ZFP961  | -0.7178903 |
| ZFPL1   | -0.7059526 |
| ZFPM1   | -2.5654588 |
| ZFR     | -0.2767005 |
| ZFY2    | -2.4893918 |
| ZFYVE1  | -1.6090794 |
| ZFYVE19 | -1.4311728 |
| ZFYVE21 | -1.6352658 |
| ZFYVE26 | -1.2083015 |
| ZFYVE28 | -1.2299621 |
| ZFYVE9  | -0.6036825 |
| ZG16    | -2.09198   |
| ZGPAT   | -0.9105387 |
| ZGRF1   | -0.5684228 |
| ZHX3    | -1.2820663 |
| ZIC1    | -0.7634909 |
| ZIC2    | -2.0399487 |
| ZIC4    | -1.6251571 |
| ZIC5    | -1.5355222 |
| ZIM1    | -1.2072842 |



|          |            |
|----------|------------|
| ZIM2     | -2.1346903 |
| ZKSCAN1  | -0.6213212 |
| ZKSCAN14 | -0.8189859 |
| ZKSCAN16 | -3.3515673 |
| ZKSCAN17 | -0.620029  |
| ZKSCAN4  | -1.5268335 |
| ZKSCAN5  | -1.2206264 |
| ZMAT5    | -0.9438615 |
| ZMIZ2    | -0.5909333 |
| ZMPSTE24 | -1.4232659 |
| ZMYM3    | -1.0997019 |
| ZMYND19  | -0.5660062 |
| ZNF512B  | -1.4204106 |
| ZNHIT1   | -1.188858  |
| ZNHIT2   | -2.168314  |
| ZNHIT3   | -1.1360092 |
| ZNHIT6   | -0.2067876 |
| ZNRD1AS  | -2.032065  |
| ZNRF2    | -0.5706325 |
| ZNRF3    | -1.003238  |
| ZNRF4    | -1.1208997 |
| ZP3R     | -3.0169487 |
| ZPR1     | -0.9305835 |
| ZRANB1   | -0.9739919 |
| ZRANB3   | -1.3229775 |
| ZSCAN10  | -1.200562  |
| ZSCAN12  | -0.7920756 |
| ZSCAN2   | -2.3272336 |
| ZSCAN20  | -0.9980896 |
| ZSCAN21  | -0.3137593 |
| ZSCAN4A  | -2.1580117 |
| ZSCAN4C  | -1.5235639 |
| ZSCAN4F  | -1.9636354 |
| ZSCAN5B  | -2.0515752 |
| ZSWIM2   | -1.6069963 |
| ZSWIM3   | -0.608892  |
| ZSWIM5   | -1.5553703 |
| ZSWIM7   | -2.400024  |
| ZW10     | -0.3017941 |
| ZWILCH   | -0.7487755 |
| ZWINT    | -0.9799414 |
| ZXDA     | -0.9153967 |
| ZYG11A   | -1.9664047 |
| ZZEF1    | -0.4702883 |
| A3GALT2  | 0.45821047 |

|          |            |
|----------|------------|
| A4GALT   | 3.270082   |
| AAK1     | 1.8477445  |
| AATK     | 0.41853333 |
| AB041803 | 2.076611   |
| ABCA13   | 2.36618    |
| ABCA17   | 0.39240718 |
| ABCA4    | 1.2796962  |
| ABCA5    | 1.6931176  |
| ABCA7    | 1.0608134  |
| ABCB1B   | 2.0712476  |
| ABCC1    | 2.042912   |
| ABCC5    | 2.4072409  |
| ABCC8    | 1.8153844  |
| ABCG1    | 1.4596267  |
| ABCG4    | 0.6616254  |
| ABHD12B  | 0.47355032 |
| ABHD13   | 0.6187084  |
| ABHD17B  | 0.63050747 |
| ABI1     | 0.8580222  |
| ABI2     | 0.83873844 |
| ABI3     | 0.3188424  |
| ABI3BP   | 1.5322537  |
| ABL2     | 0.6831622  |
| ABLIM1   | 1.0172472  |
| ABLIM3   | 0.40052032 |
| ABRACL   | 0.6246147  |
| ABTB2    | 0.3349905  |
| ACAN     | 0.61733794 |
| ACAP1    | 1.1488619  |
| ACAP2    | 0.79275036 |
| ACBD7    | 1.7535489  |
| ACE      | 5.2113276  |
| ACE2     | 0.8078289  |
| ACER2    | 3.0165372  |
| ACIN1    | 1.719913   |
| ACKR1    | 1.0528474  |
| ACKR2    | 3.4040875  |
| ACKR3    | 4.0331993  |
| ACOT10   | 1.4792562  |
| ACOT11   | 1.1093283  |
| ACOT7    | 0.3104148  |
| ACOT9    | 1.6425953  |
| ACOXL    | 5.0925307  |
| ACPP     | 2.1589625  |
| ACR      | 1.3450866  |

|          |            |
|----------|------------|
| ACRBP    | 0.50232935 |
| ACSBG1   | 1.13815    |
| ACSL4    | 0.27684212 |
| ACSS1    | 4.5019655  |
| ACTA1    | 0.30318713 |
| ACTA2    | 2.7514548  |
| ACTC1    | 8.963499   |
| ACTG1    | 0.4395337  |
| ACTG2    | 4.5608015  |
| ACTN1    | 0.99714565 |
| ACTN2    | 2.2543845  |
| ACTR3    | 0.81376266 |
| ACVR1B   | 1.7422357  |
| ACVRL1   | 2.5629287  |
| ADAM10   | 0.39851332 |
| ADAM15   | 3.0045104  |
| ADAM17   | 0.9306116  |
| ADAM19   | 3.101027   |
| ADAM22   | 0.68301344 |
| ADAM28   | 1.2982333  |
| ADAM3    | 0.42423558 |
| ADAM33   | 0.5031655  |
| ADAM5    | 1.7927973  |
| ADAM8    | 4.1443663  |
| ADAM9    | 0.88983774 |
| ADAMTS1  | 2.3033352  |
| ADAMTS10 | 0.9687743  |
| ADAMTS15 | 5.278873   |
| ADAMTS17 | 2.9844933  |
| ADAMTS2  | 1.1583629  |
| ADAMTS4  | 5.3197618  |
| ADAMTS5  | 1.2003381  |
| ADAMTS8  | 3.0326953  |
| ADAMTS9  | 4.156543   |
| ADAMTSL1 | 1.0296803  |
| ADAMTSL2 | 1.4085631  |
| ADAMTSL3 | 1.7661297  |
| ADAMTSL4 | 2.9489522  |
| ADAMTSL5 | 1.4091294  |
| ADAP1    | 0.57635975 |
| ADAR     | 0.8997903  |
| ADARB1   | 1.1143646  |
| ADC      | 0.59731483 |
| ADCY1    | 0.84331536 |
| ADCY2    | 3.9895258  |

|           |            |
|-----------|------------|
| ADCY3     | 1.0686424  |
| ADCY4     | 1.5853114  |
| ADCY5     | 1.0312285  |
| ADCY7     | 0.944016   |
| ADCY8     | 1.1185541  |
| ADCYAP1R1 | 2.3958995  |
| ADD1      | 0.47626495 |
| ADD3      | 0.62300014 |
| ADIG      | 2.2043164  |
| ADIPOQ    | 3.2103806  |
| ADM       | 3.625969   |
| ADNP2     | 0.8940525  |
| ADORA2A   | 1.4585967  |
| ADORA2B   | 6.1767416  |
| ADORA3    | 3.406767   |
| ADPRH     | 0.4856224  |
| ADPRHL1   | 0.8496418  |
| ADRB1     | 1.2499857  |
| ADRB2     | 2.959762   |
| ADRB3     | 0.6101651  |
| ADRBK1    | 0.49403477 |
| ADRBK2    | 1.0816531  |
| AEBP1     | 2.6374989  |
| AEBP2     | 1.3100748  |
| AFAP1     | 2.057025   |
| AFAP1L1   | 2.9353771  |
| AFAP1L2   | 0.8775244  |
| AFF1      | 1.7075229  |
| AFF3      | 1.0311859  |
| AFF4      | 0.2589264  |
| AFTPH     | 0.35849476 |
| AGAP1     | 2.1979127  |
| AGAP2     | 1.2974157  |
| AGAP3     | 0.49386072 |
| AGBL2     | 1.8566382  |
| AGER      | 8.131617   |
| AGFG1     | 1.6809835  |
| AGO2      | 0.62754726 |
| AGO3      | 0.57003236 |
| AGO4      | 1.4193387  |
| AGPAT1    | 0.65887594 |
| AGPAT4    | 4.6037507  |
| AGPS      | 0.8184676  |
| AGR2      | 3.58842    |
| AGR3      | 4.9431653  |

|         |            |
|---------|------------|
| AGRN    | 1.5843616  |
| AGRP    | 0.826756   |
| AGTPBP1 | 1.5470128  |
| AGTRAP  | 0.2733431  |
| AHCYL2  | 2.0107446  |
| AHDC1   | 0.38928366 |
| AHI1    | 2.3536506  |
| AHNAK   | 3.3019123  |
| AHNAK2  | 0.62998295 |
| AHSA2   | 0.47472548 |
| AHSP    | 1.5794353  |
| AIDA    | 1.27703    |
| AIF1L   | 2.9298756  |
| AIM2    | 0.5846875  |
| AIRN    | 0.9097271  |
| AJAP1   | 0.9010489  |
| AJUBA   | 0.77553034 |
| AK1     | 2.684578   |
| AK6     | 0.2324357  |
| AK8     | 3.7410758  |
| AK9     | 2.3105073  |
| AKAP10  | 0.4518652  |
| AKAP12  | 5.5317073  |
| AKAP13  | 1.9215684  |
| AKAP14  | 3.098131   |
| AKAP2   | 4.828952   |
| AKAP5   | 8.674387   |
| AKAP7   | 0.88462925 |
| AKAP8   | 0.7278781  |
| AKAP9   | 0.55940914 |
| AKIRIN2 | 0.19863176 |
| AKNA    | 2.1073203  |
| AKR1B3  | 1.0423598  |
| AKR1B8  | 0.3255415  |
| AKT3    | 2.7389817  |
| AKTIP   | 1.0378466  |
| ALCAM   | 1.5485868  |
| ALDH1A2 | 3.9119487  |
| ALDH1A3 | 1.7599692  |
| ALDH1L2 | 0.57678604 |
| ALDH3A1 | 3.7686906  |
| ALDH3B1 | 1.5454187  |
| ALG12   | 0.2766323  |
| ALKBH8  | 0.2821722  |
| ALOX12  | 0.5390196  |

|          |            |
|----------|------------|
| ALOX12E  | 2.2624218  |
| ALOX15   | 0.7878239  |
| ALOX5    | 4.096627   |
| ALOX5AP  | 1.9985294  |
| ALOXE3   | 1.8879988  |
| ALPK1    | 1.7843766  |
| ALPPL2   | 0.29039288 |
| ALS2CR12 | 1.9033444  |
| AMER1    | 0.70576143 |
| AMER3    | 1.291326   |
| AMICA1   | 3.308827   |
| AMMECR1  | 1.555893   |
| AMN1     | 1.0999742  |
| AMOTL1   | 3.1299627  |
| AMOTL2   | 1.1271324  |
| AMPD1    | 0.24612594 |
| AMPD3    | 3.488619   |
| AMPH     | 5.0878158  |
| ANAPC10  | 0.70664763 |
| ANGPT1   | 3.4676876  |
| ANGPT2   | 3.087031   |
| ANGPTL7  | 0.20088053 |
| ANK1     | 2.0932844  |
| ANK3     | 1.2063727  |
| ANKFY1   | 1.2994139  |
| ANKHD1   | 0.7392025  |
| ANKLE2   | 0.76232314 |
| ANKRA2   | 0.2848568  |
| ANKRD1   | 6.0507393  |
| ANKRD11  | 0.87115765 |
| ANKRD12  | 2.7296166  |
| ANKRD13A | 0.61028194 |
| ANKRD22  | 5.066899   |
| ANKRD23  | 0.18074226 |
| ANKRD29  | 3.092268   |
| ANKRD32  | 0.8649392  |
| ANKRD33B | 1.9622955  |
| ANKRD37  | 1.4579787  |
| ANKRD42  | 0.93016696 |
| ANKRD44  | 2.6103778  |
| ANKRD50  | 0.24758005 |
| ANKRD61  | 2.2343936  |
| ANKRD66  | 2.134113   |
| ANO1     | 3.2976747  |
| ANO6     | 2.1794515  |

|         |            |
|---------|------------|
| ANO9    | 1.7238677  |
| ANP32B  | 0.42349768 |
| ANP32E  | 1.6807408  |
| ANTXR1  | 2.658926   |
| ANTXRL  | 0.91483283 |
| ANXA1   | 4.028433   |
| ANXA11  | 0.4475279  |
| ANXA2   | 2.5601406  |
| ANXA3   | 3.9336472  |
| ANXA4   | 0.18221807 |
| ANXA5   | 0.36915302 |
| ANXA8   | 3.3217564  |
| ANXA9   | 0.7932873  |
| AOC1    | 4.09629    |
| AP1G2   | 0.47725272 |
| AP1M2   | 3.5034342  |
| AP1S2   | 2.4703608  |
| AP1S3   | 1.0518885  |
| AP3B1   | 0.51105356 |
| AP5Z1   | 0.63594484 |
| APAF1   | 1.487936   |
| APBA1   | 2.0448616  |
| APBA2   | 0.9520016  |
| APBB1   | 3.8616295  |
| APBB1IP | 1.4789429  |
| APBB2   | 2.4522471  |
| APC2    | 0.5801902  |
| APCDD1  | 1.3281319  |
| APEX2   | 0.3084433  |
| APH1B   | 1.0051422  |
| APLF    | 0.84727573 |
| APLN    | 6.4224524  |
| APLNR   | 4.330235   |
| APLP1   | 1.8486838  |
| APOBEC4 | 0.6947632  |
| APOBR   | 2.203899   |
| APOD    | 8.171482   |
| APOL10B | 1.6611085  |
| APOL6   | 0.85383606 |
| APOL7B  | 0.36299992 |
| APOLD1  | 1.7127872  |
| APP     | 0.5906129  |
| APPBP2  | 0.42927408 |
| APPL1   | 0.27333975 |
| APTX    | 0.3401351  |

|          |            |
|----------|------------|
| AQP3     | 1.6067386  |
| AQP4     | 0.51959324 |
| AQP5     | 6.445188   |
| AQP7     | 0.5184765  |
| AR       | 2.0077362  |
| ARAP2    | 0.50155115 |
| ARAP3    | 2.6480398  |
| ARC      | 1.7218001  |
| AREG     | 3.408813   |
| ARF3     | 0.24523401 |
| ARFGAP3  | 1.283184   |
| ARFIP2   | 0.4340663  |
| ARG2     | 4.2382207  |
| ARHGAP10 | 1.5726533  |
| ARHGAP15 | 0.6960132  |
| ARHGAP18 | 0.54586506 |
| ARHGAP20 | 4.6181884  |
| ARHGAP22 | 3.8140717  |
| ARHGAP23 | 0.5816436  |
| ARHGAP25 | 0.6084986  |
| ARHGAP27 | 0.9101076  |
| ARHGAP28 | 1.3053784  |
| ARHGAP30 | 2.043644   |
| ARHGAP31 | 3.013454   |
| ARHGAP32 | 0.6129458  |
| ARHGAP33 | 0.6606231  |
| ARHGAP39 | 1.0731902  |
| ARHGAP4  | 0.25617743 |
| ARHGAP44 | 3.0450945  |
| ARHGAP6  | 1.3705564  |
| ARHGAP8  | 5.116238   |
| ARHGAP9  | 1.6713514  |
| ARHGDIA  | 0.29709864 |
| ARHGDIB  | 1.5708408  |
| ARHGDIG  | 5.5745425  |
| ARHGEF1  | 0.21049786 |
| ARHGEF17 | 2.2636018  |
| ARHGEF2  | 1.8078814  |
| ARHGEF25 | 2.0383162  |
| ARHGEF26 | 0.33268023 |
| ARHGEF28 | 5.4042907  |
| ARHGEF3  | 0.9827981  |
| ARHGEF38 | 2.8103092  |
| ARHGEF4  | 0.8693602  |
| ARHGEF5  | 0.29216623 |



|         |            |
|---------|------------|
| ARHGEF6 | 1.2981105  |
| ARHGEF7 | 0.6914072  |
| ARID1A  | 0.2510848  |
| ARID2   | 0.770103   |
| ARID3A  | 2.786477   |
| ARID3B  | 0.31796885 |
| ARID4A  | 0.24804115 |
| ARID4B  | 1.1651607  |
| ARID5A  | 4.2179627  |
| ARID5B  | 1.7317467  |
| ARIH1   | 0.40162802 |
| ARL10   | 1.0764084  |
| ARL13B  | 0.8924236  |
| ARL14EP | 0.45829296 |
| ARL15   | 0.3474574  |
| ARL2    | 0.32072496 |
| ARL2BP  | 2.0731578  |
| ARL5B   | 0.4730153  |
| ARL5C   | 2.3574471  |
| ARL6    | 0.4975624  |
| ARL6IP1 | 0.31456137 |
| ARL8A   | 0.507741   |
| ARMC2   | 3.6986713  |
| ARMC3   | 4.362661   |
| ARMC4   | 4.465731   |
| ARMC7   | 0.20518112 |
| ARMCX1  | 0.9978838  |
| ARMCX2  | 1.730722   |
| ARMCX3  | 0.8758178  |
| ARMCX4  | 1.9537506  |
| ARPC1B  | 1.2509432  |
| ARPC2   | 0.27412796 |
| ARPC5   | 0.23158121 |
| ARRB1   | 0.6927695  |
| ARRDC1  | 1.56851    |
| ARRDC2  | 0.6399746  |
| ARRDC4  | 1.433207   |
| ARSI    | 0.6942735  |
| ARSJ    | 3.479561   |
| ART1    | 1.6555331  |
| ART3    | 1.7443848  |
| ARTN    | 4.2533765  |
| ARXES1  | 0.8060758  |
| ARXES2  | 5.3746696  |
| ASAP1   | 0.5917816  |

|         |            |
|---------|------------|
| ASAP2   | 0.7533088  |
| ASB1    | 0.42593098 |
| ASB14   | 2.451755   |
| ASB3    | 0.54961705 |
| ASB4    | 0.5584974  |
| ASB5    | 0.9423125  |
| ASB7    | 0.44335794 |
| ASCC2   | 0.51782656 |
| ASCC3   | 0.3316779  |
| ASCL1   | 1.3466828  |
| ASCL2   | 1.8313556  |
| ASCL3   | 1.859242   |
| ASF1A   | 0.8935175  |
| ASH1L   | 1.6050482  |
| ASNS    | 1.0596466  |
| ASPH    | 0.3042779  |
| ASPHD2  | 0.89814425 |
| ASPN    | 2.798392   |
| ASPRV1  | 6.0840335  |
| ATAD2   | 0.5078368  |
| ATAD2B  | 0.37539148 |
| ATAD5   | 0.40069222 |
| ATF2    | 0.17008495 |
| ATF3    | 3.2039309  |
| ATF7    | 2.5156589  |
| ATF7IP  | 0.62192154 |
| ATG9A   | 0.88075686 |
| ATL1    | 2.062818   |
| ATL3    | 0.26173496 |
| ATMIN   | 0.16423559 |
| ATP10A  | 3.8131638  |
| ATP10D  | 1.2689457  |
| ATP11A  | 3.204392   |
| ATP13A3 | 0.43290806 |
| ATP13A4 | 1.849406   |
| ATP1A2  | 3.2689786  |
| ATP1A3  | 0.69045806 |
| ATP1A4  | 1.5044668  |
| ATP1B1  | 1.7110991  |
| ATP1B2  | 1.4082794  |
| ATP2A1  | 0.9396901  |
| ATP2A2  | 0.40188313 |
| ATP2A3  | 3.4310384  |
| ATP2B1  | 1.6758265  |
| ATP2B4  | 1.2865047  |

|             |            |
|-------------|------------|
| ATP2C2      | 1.6204803  |
| ATP6AP1     | 0.18165064 |
| ATP6V0A4    | 5.9320254  |
| ATP6V0D2    | 1.5955768  |
| ATP6V0E     | 0.15753126 |
| ATP6V0E2    | 0.8312106  |
| ATP6V1C2    | 7.1318836  |
| ATP6V1G1    | 0.4107728  |
| ATP6V1G2    | 0.2933774  |
| ATP7A       | 2.005416   |
| ATP8A1      | 1.1808848  |
| ATP8B4      | 3.7315755  |
| ATP9B       | 1.7651658  |
| ATRNL1      | 1.0659432  |
| ATRX        | 0.65784407 |
| ATXN1       | 1.2699153  |
| ATXN1L      | 0.96529865 |
| ATXN2L      | 0.3249035  |
| ATXN7L1     | 1.4722342  |
| AUTS2       | 1.8461914  |
| AVL9        | 0.57846737 |
| AWAT1       | 1.4078512  |
| AZI2        | 0.25260592 |
| AZIN1       | 0.17520952 |
| B3GALNT1    | 0.9024577  |
| B3GLCT      | 1.2783251  |
| B3GNT2      | 0.33240604 |
| B3GNT5      | 1.9881945  |
| B3GNT7      | 1.2907422  |
| B3GNT9      | 1.4650798  |
| B4GALNT2    | 0.9501693  |
| B4GALT2     | 1.6997693  |
| B4GALT3     | 1.2977276  |
| B4GALT4     | 2.0652084  |
| B630019K06I | 0.891093   |
| B9D1        | 2.5441513  |
| B9D1OS      | 1.2527328  |
| BACH1       | 1.1830406  |
| BACH2       | 0.18045688 |
| BAG3        | 0.72267866 |
| BAI2        | 0.5694258  |
| BARX2       | 1.8660223  |
| BASP1       | 1.2758999  |
| BATF        | 2.8302484  |
| BATF2       | 2.3519297  |

|          |            |
|----------|------------|
| BAX      | 0.9436269  |
| BAZ1A    | 1.6792812  |
| BAZ1B    | 0.60034466 |
| BAZ2B    | 1.5992904  |
| BBIP1    | 1.060435   |
| BBS1     | 1.2281475  |
| BBS12    | 1.1489725  |
| BBS2     | 2.1988049  |
| BBS4     | 0.48833656 |
| BBS9     | 1.2784433  |
| BBX      | 0.26556492 |
| BC021767 | 0.5733919  |
| BCAM     | 2.7116256  |
| BCAN     | 0.90781426 |
| BCAR3    | 0.93102884 |
| BCAS1    | 0.6008315  |
| BCAS3OS2 | 2.8320823  |
| BCL10    | 0.59694433 |
| BCL11A   | 1.6235034  |
| BCL11B   | 1.7861156  |
| BCL2     | 1.2049413  |
| BCL2A1C  | 4.2524705  |
| BCL2A1D  | 4.270864   |
| BCL2L1   | 1.7065582  |
| BCL2L11  | 1.5066354  |
| BCL2L14  | 1.8181534  |
| BCL2L15  | 1.6715035  |
| BCL3     | 2.3882618  |
| BCL6     | 1.8230271  |
| BCL6B    | 3.8947372  |
| BCL9     | 2.122249   |
| BCLAF1   | 0.8056407  |
| BCR      | 0.9203558  |
| BDKRB1   | 3.4605656  |
| BDKRB2   | 4.2609515  |
| BDNF     | 5.291429   |
| BDP1     | 1.3782134  |
| BEAN1    | 5.156312   |
| BEGAIN   | 2.1295304  |
| BEND4    | 0.8295777  |
| BEND5    | 2.3125794  |
| BEND7    | 2.2181225  |
| BEST2    | 1.1366215  |
| BEX1     | 1.6248131  |
| BEX2     | 4.139961   |

|         |            |
|---------|------------|
| BEX4    | 3.6855664  |
| BFSP1   | 1.7322206  |
| BGN     | 1.5534539  |
| BHLHE22 | 0.84689    |
| BICC1   | 1.9108758  |
| BICD1   | 2.2858722  |
| BICD2   | 1.4245391  |
| BIN2    | 0.29732752 |
| BIRC2   | 1.4316425  |
| BIRC3   | 3.2338176  |
| BLNK    | 1.6085596  |
| BLZF1   | 0.6301141  |
| BMF     | 2.166996   |
| BMP2K   | 1.4214435  |
| BMP3    | 4.408589   |
| BMP4    | 2.34449    |
| BMP5    | 1.6531358  |
| BMP6    | 2.7131329  |
| BMPER   | 1.5945511  |
| BMPR1A  | 0.22958088 |
| BMPR1B  | 2.599528   |
| BMPR2   | 2.9891882  |
| BMS1    | 1.5921936  |
| BMX     | 1.9038229  |
| BNC2    | 1.4868054  |
| BNIP2   | 0.3560133  |
| BNIPL   | 2.0913458  |
| BOC     | 4.132844   |
| BORA    | 1.5557487  |
| BPIFA1  | 8.5567875  |
| BPIFB1  | 6.838943   |
| BPIFB5  | 5.045643   |
| BPTF    | 0.6914606  |
| BRAF    | 1.1108003  |
| BRD1    | 1.9036794  |
| BRD2    | 0.5700884  |
| BRD4    | 0.7218518  |
| BRD8    | 2.0221086  |
| BRD9    | 0.8340931  |
| BRINP1  | 4.145658   |
| BRIX1   | 0.577549   |
| BRMS1L  | 0.99211645 |
| BRPF1   | 0.77937365 |
| BRSK1   | 2.0951571  |
| BRWD1   | 0.820426   |

|          |            |
|----------|------------|
| BSPRY    | 2.7306247  |
| BST1     | 4.2758636  |
| BTAF1    | 0.29323673 |
| BTBD10   | 1.4622111  |
| BTBD11   | 1.7795529  |
| BTBD19   | 0.47269154 |
| BTBD3    | 0.85960937 |
| BTBD7    | 1.3581455  |
| BTG1     | 0.40807247 |
| BTG2     | 2.1732283  |
| BTG3     | 2.7534957  |
| BTK      | 0.6759081  |
| BTLA     | 2.6665854  |
| BTNL10   | 0.37608624 |
| BUB1     | 0.54652095 |
| BUD13    | 0.21536493 |
| BVES     | 3.1967056  |
| BZRAP1   | 0.7875912  |
| BZW2     | 1.4146895  |
| C1GALT1  | 0.38126373 |
| C1QTNF2  | 1.1591024  |
| C1QTNF3  | 0.9884839  |
| C1QTNF7  | 3.4843688  |
| C2CD3    | 1.0780096  |
| C2CD4A   | 1.4469001  |
| C2CD4B   | 5.6445956  |
| C5AR1    | 3.5124505  |
| C7       | 4.65907    |
| CAB39    | 0.58066607 |
| CABP5    | 1.810133   |
| CACHD1   | 2.480568   |
| CACNA1C  | 3.4792247  |
| CACNA1D  | 2.3996334  |
| CACNA1S  | 0.34245157 |
| CACNA2D1 | 3.2843513  |
| CACNA2D2 | 0.8569257  |
| CACNA2D4 | 2.4592712  |
| CACNB1   | 0.726192   |
| CACNB2   | 0.6134734  |
| CACNB3   | 1.2755542  |
| CAD      | 1.5829048  |
| CALCA    | 4.4374137  |
| CALCOCO1 | 0.7299075  |
| CALCOCO2 | 0.15065098 |
| CALCRL   | 3.488426   |

|          |            |
|----------|------------|
| CALM1    | 0.30651903 |
| CALML3   | 1.0912981  |
| CALY     | 0.69413877 |
| CAMK1G   | 1.5180604  |
| CAMK2A   | 0.780051   |
| CAMK2D   | 1.2195563  |
| CAMK2G   | 0.27556562 |
| CAMK4    | 1.2140481  |
| CAMKK1   | 1.7008176  |
| CAMKK2   | 1.3089409  |
| CAMKV    | 0.506382   |
| CAMP     | 3.692462   |
| CAMSAP1  | 1.6875215  |
| CAMSAP2  | 1.9568067  |
| CAMTA1   | 2.7612495  |
| CAMTA2   | 0.15094376 |
| CAP1     | 1.2188134  |
| CAP2     | 2.3458896  |
| CAPG     | 2.711472   |
| CAPN1    | 0.4425435  |
| CAPN13   | 1.6527777  |
| CAPN2    | 0.68096733 |
| CAPNS2   | 2.3581123  |
| CAPS2    | 2.4532576  |
| CAPSL    | 2.9635677  |
| CAR12    | 0.68600893 |
| CAR13    | 3.4509938  |
| CAR15    | 0.8490958  |
| CAR8     | 0.21620011 |
| CAR9     | 0.19053507 |
| CARD11   | 2.1045094  |
| CARF     | 0.37938356 |
| CASC1    | 4.56916    |
| CASC4    | 1.5406041  |
| CASC5    | 0.97659755 |
| CASK     | 0.8986473  |
| CASKIN2  | 0.5068164  |
| CASP1    | 0.687932   |
| CASP12   | 0.61528134 |
| CASP2    | 0.8178568  |
| CASP4    | 3.2828646  |
| CASP8AP2 | 1.0441089  |
| CASQ2    | 2.943288   |
| CAST     | 0.39643335 |
| CASZ1    | 3.7012045  |

|          |            |
|----------|------------|
| CATIP    | 0.4268446  |
| CATSPER4 | 0.7457168  |
| CAV1     | 4.139792   |
| CAV2     | 3.522193   |
| CAV3     | 3.9774194  |
| CBFA2T3  | 1.8501415  |
| CBFB     | 1.2075434  |
| CBL      | 2.822873   |
| CBLB     | 1.8101873  |
| CBLL1    | 0.40305662 |
| CBR2     | 9.845379   |
| CBR3     | 2.0566225  |
| CBWD1    | 0.5191574  |
| CBX5     | 0.7191682  |
| CBX6     | 0.91152143 |
| CC2D2A   | 0.88269234 |
| CCBE1    | 1.1015859  |
| CCDC102A | 1.4747424  |
| CCDC103  | 1.9412072  |
| CCDC108  | 1.9658263  |
| CCDC109B | 1.9621651  |
| CCDC11   | 4.6112814  |
| CCDC112  | 0.54194593 |
| CCDC113  | 6.8228135  |
| CCDC114  | 0.4330125  |
| CCDC115  | 0.4575014  |
| CCDC120  | 0.8489032  |
| CCDC121  | 2.811455   |
| CCDC122  | 0.39333487 |
| CCDC126  | 0.33776712 |
| CCDC127  | 0.19557333 |
| CCDC129  | 2.150005   |
| CCDC13   | 2.8956063  |
| CCDC132  | 0.52190685 |
| CCDC134  | 0.2608838  |
| CCDC135  | 1.473742   |
| CCDC136  | 1.5799723  |
| CCDC141  | 1.2439477  |
| CCDC146  | 0.53175974 |
| CCDC147  | 3.4442298  |
| CCDC15   | 1.7717283  |
| CCDC150  | 3.0662692  |
| CCDC153  | 6.7453594  |
| CCDC155  | 2.5947828  |
| CCDC160  | 1.620584   |



|         |            |
|---------|------------|
| CCDC17  | 1.6881177  |
| CCDC170 | 2.8759797  |
| CCDC173 | 2.9459288  |
| CCDC174 | 0.643806   |
| CCDC176 | 1.3002577  |
| CCDC181 | 1.2445912  |
| CCDC184 | 3.6789029  |
| CCDC19  | 5.7985053  |
| CCDC30  | 1.6985502  |
| CCDC33  | 2.2841995  |
| CCDC37  | 2.9475448  |
| CCDC39  | 3.3801644  |
| CCDC40  | 1.96976    |
| CCDC42B | 1.2242639  |
| CCDC50  | 0.25895214 |
| CCDC59  | 0.56936216 |
| CCDC62  | 0.50156784 |
| CCDC64B | 3.005199   |
| CCDC65  | 2.761984   |
| CCDC66  | 1.2056961  |
| CCDC67  | 0.90648746 |
| CCDC68  | 0.72199297 |
| CCDC69  | 1.0362005  |
| CCDC71L | 1.5518336  |
| CCDC77  | 0.6527753  |
| CCDC78  | 4.338008   |
| CCDC81  | 4.0755777  |
| CCDC85A | 2.8166873  |
| CCDC88A | 2.7062821  |
| CCDC88B | 2.2717452  |
| CCDC88C | 0.88038707 |
| CCDC92  | 4.06405    |
| CCDC96  | 0.51510906 |
| CCKAR   | 5.901823   |
| CCL1    | 1.9278648  |
| CCL11   | 4.7757907  |
| CCL12   | 5.357309   |
| CCL17   | 7.50753    |
| CCL19   | 0.25676727 |
| CCL2    | 4.3223877  |
| CCL3    | 6.5118375  |
| CCL4    | 4.254403   |
| CCL5    | 1.8540192  |
| CCL6    | 0.8938656  |
| CCL7    | 5.3001566  |

|         |            |
|---------|------------|
| CCL8    | 2.0249825  |
| CCM2L   | 1.6993718  |
| CCNA1   | 1.6327465  |
| CCNC    | 0.25360155 |
| CCND2   | 2.5713105  |
| CCNDBP1 | 0.25548887 |
| CCNG2   | 1.0772495  |
| CCNJ    | 1.8898764  |
| CCNJL   | 0.7646606  |
| CCNL1   | 2.0053334  |
| CCNO    | 2.3028774  |
| CCNT1   | 0.43335962 |
| CCNT2   | 0.15162039 |
| CCNYL1  | 1.2501979  |
| CCP110  | 1.7182088  |
| CCR10   | 1.0170023  |
| CCR1L1  | 0.72019005 |
| CCR2    | 1.8356643  |
| CCR6    | 3.1928558  |
| CCR7    | 3.0957384  |
| CCR8    | 0.29897428 |
| CCR9    | 1.4384942  |
| CCRL2   | 4.1570024  |
| CCSAP   | 0.35343027 |
| CCSER1  | 0.87747145 |
| CCSER2  | 0.9851165  |
| CD101   | 0.24919724 |
| CD109   | 1.1467533  |
| CD14    | 2.7672124  |
| CD160   | 2.174722   |
| CD163   | 0.6731038  |
| CD163L1 | 3.015897   |
| CD164L2 | 1.3872864  |
| CD177   | 4.3754654  |
| CD19    | 1.0977633  |
| CD2     | 2.3148255  |
| CD200   | 5.149815   |
| CD207   | 1.1578479  |
| CD209A  | 3.5643103  |
| CD209C  | 2.2422009  |
| CD209D  | 2.1195183  |
| CD209E  | 2.371802   |
| CD209F  | 2.1734142  |
| CD209G  | 1.4791644  |
| CD226   | 1.5782971  |

|          |            |
|----------|------------|
| CD244    | 0.6468396  |
| CD24A    | 4.0723968  |
| CD27     | 0.30684876 |
| CD274    | 2.447782   |
| CD28     | 1.3028827  |
| CD300LF  | 2.5148802  |
| CD33     | 5.511957   |
| CD34     | 4.452408   |
| CD36     | 2.0468702  |
| CD37     | 0.8974142  |
| CD3D     | 1.8823562  |
| CD3E     | 0.57776594 |
| CD3G     | 1.365037   |
| CD40     | 3.3402271  |
| CD44     | 1.8683233  |
| CD46     | 0.6820111  |
| CD47     | 0.29054928 |
| CD48     | 0.34235477 |
| CD5      | 1.8525667  |
| CD52     | 1.5551667  |
| CD53     | 2.858006   |
| CD55     | 0.6502781  |
| CD6      | 2.1547937  |
| CD63     | 1.0858512  |
| CD69     | 5.395208   |
| CD72     | 0.7638693  |
| CD79A    | 0.61448216 |
| CD79B    | 1.0089211  |
| CD80     | 0.66875505 |
| CD83     | 1.0967245  |
| CD8A     | 1.7570772  |
| CD8B1    | 2.218277   |
| CD9      | 1.4803224  |
| CD93     | 4.2559366  |
| CD96     | 1.7705994  |
| CD97     | 0.70588064 |
| CD99     | 1.3477893  |
| CDAN1    | 0.43126297 |
| CDC14A   | 1.8746872  |
| CDC25B   | 1.4560919  |
| CDC27    | 0.36820078 |
| CDC42    | 0.16472387 |
| CDC42BPA | 1.6643262  |
| CDC42BPG | 1.3885875  |
| CDC42EP1 | 0.48537922 |

|          |            |
|----------|------------|
| CDC42EP2 | 1.8352551  |
| CDC42EP3 | 2.5637174  |
| CDC42EP4 | 1.2445555  |
| CDC42SE1 | 1.1794538  |
| CDC42SE2 | 1.2589664  |
| CDC45    | 0.82389164 |
| CDC5L    | 0.7998891  |
| CDC6     | 0.35246468 |
| CDC7     | 0.46254802 |
| CDC73    | 0.83332443 |
| CDCA4    | 0.37336922 |
| CDCA7    | 0.7640996  |
| CDCP1    | 1.0764823  |
| CDH1     | 2.0235448  |
| CDH11    | 1.3021214  |
| CDH13    | 0.8604355  |
| CDH15    | 1.6054685  |
| CDH16    | 6.302677   |
| CDH22    | 2.813042   |
| CDH5     | 2.1032772  |
| CDH6     | 0.94212747 |
| CDHR3    | 3.47746    |
| CDHR4    | 4.0132413  |
| CDK11B   | 0.35786676 |
| CDK12    | 0.31326246 |
| CDK13    | 0.41569424 |
| CDK14    | 2.9541135  |
| CDK17    | 0.8694687  |
| CDK19    | 0.84072495 |
| CDK5R1   | 0.5458038  |
| CDK6     | 1.0091405  |
| CDKL1    | 1.0904031  |
| CDKL2    | 1.5875578  |
| CDKL3    | 1.1279619  |
| CDKL4    | 2.0937207  |
| CDKL5    | 1.6946542  |
| CDKN1A   | 1.6168733  |
| CDKN1B   | 0.8979354  |
| CDKN1C   | 0.9937477  |
| CDKN2B   | 4.2403083  |
| CDKN2D   | 1.8694873  |
| CDNF     | 0.9057114  |
| CDON     | 1.2119677  |
| CDPF1    | 0.4926777  |
| CDR2     | 1.8979416  |

|           |            |
|-----------|------------|
| CDR2L     | 0.50350237 |
| CDS1      | 3.4209986  |
| CDYL2     | 1.54987    |
| CEACAM10  | 4.8840823  |
| CEACAM16  | 1.0508466  |
| CEBPD     | 4.708289   |
| CEBPE     | 0.514626   |
| CEBPG     | 0.49975204 |
| CECR2     | 1.151814   |
| CEL       | 0.79881644 |
| CELF2     | 1.593338   |
| CELF6     | 0.30108523 |
| CELSR2    | 0.5097184  |
| CELSR3    | 3.8863769  |
| CENPC1    | 0.7158561  |
| CENPE     | 0.46278334 |
| CENPJ     | 0.72213316 |
| CENPT     | 0.37651587 |
| CEP104    | 0.83442855 |
| CEP112    | 1.7237995  |
| CEP112OS2 | 1.2735329  |
| CEP120    | 1.0943108  |
| CEP128    | 0.76846194 |
| CEP135    | 0.49250507 |
| CEP162    | 0.7290573  |
| CEP170    | 1.7849708  |
| CEP192    | 1.1433043  |
| CEP290    | 1.3162878  |
| CEP350    | 0.46561575 |
| CEP55     | 0.8077047  |
| CEP70     | 1.3767924  |
| CEP76     | 0.2107575  |
| CEP83     | 0.9230571  |
| CEP85L    | 0.59586644 |
| CEP95     | 0.5248642  |
| CERCAM    | 1.3018608  |
| CERK      | 1.5032468  |
| CERS3     | 0.45036364 |
| CERS4     | 1.4492745  |
| CERS5     | 2.0274334  |
| CERS6     | 1.3688698  |
| CETN2     | 0.5035038  |
| CETN3     | 0.26926994 |
| CETN4     | 2.1666236  |
| CFD       | 4.7511926  |

|         |            |
|---------|------------|
| CFL1    | 0.39669895 |
| CFLAR   | 1.5618482  |
| CFTR    | 1.2334023  |
| CGGBP1  | 0.22273827 |
| CGN     | 0.36801958 |
| CGNL1   | 0.68014526 |
| CH25H   | 7.3673854  |
| CHAD    | 4.466387   |
| CHAMP1  | 0.8380568  |
| CHD1    | 1.5029421  |
| CHD2    | 1.8630848  |
| CHD3OS  | 1.2319863  |
| CHD5    | 1.7444377  |
| CHD6    | 1.1472831  |
| CHD7    | 1.1306839  |
| CHD8    | 0.67070055 |
| CHEK1   | 1.0607874  |
| CHGA    | 0.55040145 |
| CHGB    | 1.3212781  |
| CHIA1   | 7.36826    |
| CHIC1   | 0.9104824  |
| CHIC2   | 1.319097   |
| CHIL1   | 3.5461116  |
| CHIL3   | 4.849409   |
| CHIL4   | 3.0106318  |
| CHIL5   | 4.9247036  |
| CHL1    | 3.4137983  |
| CHM     | 0.4864273  |
| CHML    | 1.9184203  |
| CHMP4B  | 0.42240667 |
| CHMP4C  | 1.2042272  |
| CHN1    | 2.5321162  |
| CHPF    | 1.6041908  |
| CHRD1   | 1.8999248  |
| CHRM2   | 3.2526412  |
| CHRM3   | 2.7222986  |
| CHRNA10 | 0.9677193  |
| CHRNA7  | 0.7842605  |
| CHRN1   | 3.3617518  |
| CHST1   | 6.9697337  |
| CHST10  | 1.009373   |
| CHST11  | 4.113372   |
| CHST12  | 1.835562   |
| CHST14  | 0.22367334 |
| CHST15  | 0.47753096 |

|         |            |
|---------|------------|
| CHST3   | 2.3309884  |
| CHST5   | 2.1901436  |
| CHST8   | 4.011756   |
| CHSY1   | 1.3771048  |
| CHTF8   | 0.21334505 |
| CHTOP   | 0.1514883  |
| CIC     | 0.45088577 |
| CIDEA   | 3.0406756  |
| CIDEC   | 2.419828   |
| CILP    | 0.81725717 |
| CISH    | 2.111343   |
| CITED1  | 1.2286313  |
| CIZ1    | 0.43677425 |
| CKAP4   | 2.6798334  |
| CKAP5   | 0.6692934  |
| CKLF    | 1.8938966  |
| CKM     | 1.9398062  |
| CKMT1   | 0.8181801  |
| CKMT2   | 6.1313767  |
| CKS2    | 2.2025595  |
| CLASP1  | 0.6917572  |
| CLASRP  | 0.18608236 |
| CLCA3   | 7.603313   |
| CLCN6   | 0.44041085 |
| CLCNKA  | 3.0720196  |
| CLDN10  | 5.734828   |
| CLDN15  | 0.4080038  |
| CLDN18  | 2.6136284  |
| CLDN22  | 2.3352058  |
| CLDN5   | 3.4468584  |
| CLDN7   | 3.4059076  |
| CLDN8   | 2.1803997  |
| CLDN9   | 1.0648332  |
| CLEC10A | 1.6475296  |
| CLEC12B | 0.5468395  |
| CLEC1A  | 2.2964644  |
| CLEC2I  | 0.9270606  |
| CLEC3B  | 2.9054465  |
| CLEC4A1 | 0.9070473  |
| CLEC4A3 | 0.4665823  |
| CLEC4A4 | 1.1582584  |
| CLEC4B1 | 1.0286822  |
| CLEC4D  | 5.4438753  |
| CLEC4E  | 5.2542295  |
| CLEC4N  | 0.3844242  |

|         |            |
|---------|------------|
| CLEC5A  | 3.267853   |
| CLEC9A  | 0.8077369  |
| CLIC1   | 1.4478159  |
| CLIC3   | 6.7846413  |
| CLIC4   | 3.0850172  |
| CLIC5   | 5.8202147  |
| CLIC6   | 6.79585    |
| CLIP1   | 1.438262   |
| CLIP2   | 0.74402523 |
| CLIP3   | 2.4007745  |
| CLIP4   | 4.5816875  |
| CLK1    | 0.7677536  |
| CLK2    | 0.8974428  |
| CLMP    | 2.813775   |
| CLNK    | 2.5761683  |
| CLOCK   | 0.3832445  |
| CLSTN1  | 2.736299   |
| CLSTN2  | 3.6308093  |
| CMA1    | 1.5187614  |
| CMIP    | 0.78186226 |
| CMKLR1  | 1.709326   |
| CMPK2   | 1.5777326  |
| CMTM2A  | 1.0967517  |
| CMTM3   | 0.52202654 |
| CMTM7   | 0.7258601  |
| CMYA5   | 1.7551951  |
| CNBD2   | 1.1589077  |
| CNEP1R1 | 0.5703697  |
| CNFN    | 1.3503745  |
| CNGA1   | 0.647321   |
| CNGA2   | 2.5340178  |
| CNIH2   | 0.34114337 |
| CNIH4   | 0.8520436  |
| CNKSR1  | 2.2366605  |
| CNKSR2  | 0.79043555 |
| CNKSR3  | 0.45347834 |
| CNN1    | 6.370219   |
| CNN2    | 2.2128372  |
| CNNM4   | 0.23568726 |
| CNOT2   | 0.24014378 |
| CNOT4   | 1.0856943  |
| CNPY4   | 0.59321404 |
| CNR1    | 3.0063825  |
| CNRIP1  | 0.42505884 |
| CNTLN   | 0.7211299  |



|          |            |
|----------|------------|
| CNTN1    | 5.10454    |
| CNTRL    | 1.3278513  |
| COG3     | 0.60023785 |
| COG5     | 1.8491259  |
| COL13A1  | 1.034955   |
| COL16A1  | 1.6118708  |
| COL1A1   | 2.041441   |
| COL1A2   | 2.1359706  |
| COL23A1  | 4.1358676  |
| COL2A1   | 1.2460701  |
| COL3A1   | 0.650537   |
| COL4A1   | 3.269289   |
| COL4A2   | 2.8531885  |
| COL4A3   | 4.80116    |
| COL4A3BP | 0.5035615  |
| COL4A4   | 3.096871   |
| COL4A5   | 3.2158031  |
| COL4A6   | 2.025704   |
| COL5A2   | 1.0853531  |
| COL6A1   | 3.0834227  |
| COL6A2   | 2.5745635  |
| COL6A3   | 1.7690177  |
| COL7A1   | 2.8636332  |
| COL8A1   | 1.3141232  |
| COL8A2   | 1.5777097  |
| COLGALT2 | 1.0569255  |
| COLQ     | 3.9805193  |
| COMP     | 1.7382812  |
| COPS4    | 0.23879528 |
| CORO1A   | 2.0475593  |
| CORO1C   | 0.35366678 |
| CORO2A   | 1.2983322  |
| CORO2B   | 1.1326585  |
| COTL1    | 0.55813265 |
| COX4I2   | 2.5614834  |
| COX6A2   | 5.613739   |
| COX6B2   | 0.98737717 |
| COX8B    | 6.541196   |
| CPA3     | 2.829223   |
| CPB1     | 0.23786926 |
| CPD      | 1.6549816  |
| CPE      | 3.8534002  |
| CPEB1    | 1.5087814  |
| CPEB4    | 1.1282587  |
| CPED1    | 0.6645942  |

|            |            |
|------------|------------|
| CPM        | 2.0987296  |
| CPNE1      | 0.4051242  |
| CPNE5      | 0.7145114  |
| CPNE7      | 1.2705705  |
| CPNE8      | 0.67610025 |
| CPSF2      | 0.55905676 |
| CPSF6      | 0.9125562  |
| CPSF7      | 0.6157279  |
| CPXM1      | 0.53496504 |
| CR1L       | 0.29334497 |
| CRABP1     | 0.95401406 |
| CRAMP1L    | 0.8313503  |
| CREB1      | 1.7994044  |
| CREB3L1    | 1.7869787  |
| CREB3L2    | 0.44019222 |
| CREB3L4    | 1.3369391  |
| CREBL2     | 0.91943216 |
| CREBRF     | 1.619669   |
| CREBZF     | 0.17989779 |
| CRELD2     | 0.6558409  |
| CRIM1      | 2.113398   |
| CRIP1      | 1.4262142  |
| CRIP2      | 0.2283163  |
| CRISPLD2   | 5.58203    |
| CRK        | 1.102118   |
| CRLF1      | 5.4520235  |
| CRLF2      | 0.26608944 |
| CRLF3      | 1.3502674  |
| CRMP1      | 2.7626433  |
| CRNDE      | 1.4729631  |
| CRTAM      | 2.038684   |
| CRTC3      | 0.40873766 |
| CRYAA      | 1.7439919  |
| CRYAB      | 2.9976182  |
| CRYBG3     | 2.4034405  |
| CSF1       | 2.1215186  |
| CSF2       | 4.8627124  |
| CSF2RA     | 1.6884499  |
| CSF2RB     | 1.6081915  |
| CSF2RB2    | 0.8228936  |
| CSF3       | 4.525467   |
| CSF3R      | 1.344574   |
| CSGALNACT1 | 3.1429038  |
| CSGALNACT2 | 1.4508686  |
| CSNK1A1    | 0.3489833  |

|           |            |
|-----------|------------|
| CSNK1E    | 1.7808695  |
| CSNK1G1   | 1.3055835  |
| CSNK1G3   | 0.2557764  |
| CSPG4     | 5.4399695  |
| CSRNP1    | 3.8733983  |
| CSRNP3    | 1.4294121  |
| CSRP1     | 2.150486   |
| CST3      | 0.36235523 |
| CST7      | 1.8025956  |
| CST8      | 2.291585   |
| CSTAD     | 0.9863038  |
| CSTF2     | 0.4852667  |
| CTBP2     | 2.394413   |
| CTBS      | 1.0019603  |
| CTDP1     | 0.4933939  |
| CTDSPL    | 1.5060887  |
| CTDSPL2   | 0.97093916 |
| CTGF      | 1.9441409  |
| CTLA2A    | 3.5044088  |
| CTLA2B    | 2.8419785  |
| CTLA4     | 1.8738425  |
| CTNNA1    | 1.6604629  |
| CTNNAL1   | 0.5074401  |
| CTNNB1    | 0.7717066  |
| CTNND2    | 2.6482403  |
| CTPS      | 3.590869   |
| CTRL      | 1.1104896  |
| CTSK      | 2.0983653  |
| CTSO      | 0.536324   |
| CTTNBP2NL | 3.287592   |
| CTXN1     | 1.4925566  |
| CUEDC1    | 1.2178793  |
| CUL3      | 0.51374626 |
| CUL7      | 1.4372396  |
| CUX1      | 0.94865084 |
| CWC22     | 1.87285    |
| CWC27     | 0.61738205 |
| CX3CL1    | 5.623307   |
| CX3CR1    | 3.0497947  |
| CXCL1     | 3.601387   |
| CXCL10    | 3.6804585  |
| CXCL13    | 0.63078785 |
| CXCL14    | 5.406471   |
| CXCL15    | 9.817976   |
| CXCL16    | 1.8971529  |

|            |            |
|------------|------------|
| CXCL17     | 7.778163   |
| CXCL2      | 5.5286794  |
| CXCL3      | 3.4859731  |
| CXCL5      | 6.834544   |
| CXCR1      | 2.5639818  |
| CXCR2      | 4.7423954  |
| CXCR3      | 0.8639822  |
| CXCR4      | 2.4876199  |
| CXCR5      | 1.5206833  |
| CXCR6      | 1.0892558  |
| CXX1A      | 0.7424989  |
| CXX1B      | 0.30564547 |
| CXX1C      | 0.4250207  |
| CYB561     | 3.1838264  |
| CYB5R1     | 0.38997412 |
| CYB5R4     | 0.19578838 |
| CYBA       | 1.233594   |
| CYBB       | 2.056806   |
| CYBRD1     | 2.9103067  |
| CYFIP2     | 2.5726328  |
| CYGB       | 0.32203817 |
| CYLD       | 0.5518217  |
| CYP1B1     | 1.8263154  |
| CYP27B1    | 0.78517413 |
| CYP2B10    | 0.18052006 |
| CYP2F2     | 0.3881178  |
| CYP2S1     | 5.501855   |
| CYP4B1     | 4.183475   |
| CYP4B1-PS2 | 1.488652   |
| CYP4F18    | 2.149136   |
| CYR61      | 2.4109955  |
| CYSLTR2    | 0.7239435  |
| CYSTM1     | 0.7373352  |
| CYTH3      | 3.783062   |
| CYTH4      | 0.35633802 |
| CYTIP      | 3.9528928  |
| CYTL1      | 5.2337003  |
| CYYR1      | 4.5113974  |
| DAAM2      | 1.329802   |
| DAB2       | 0.5153189  |
| DAB2IP     | 0.703949   |
| DACH1      | 5.3141627  |
| DACT1      | 1.075964   |
| DACT3      | 0.7238121  |
| DAF2       | 1.2941184  |

|          |            |
|----------|------------|
| DAG1     | 0.962801   |
| DAGLA    | 2.144707   |
| DAPL1    | 2.543966   |
| DAPP1    | 1.7278671  |
| DAW1     | 1.0124393  |
| DAXX     | 2.1720862  |
| DBF4     | 0.5773163  |
| DBH      | 2.3878274  |
| DBN1     | 2.124207   |
| DBNDD1   | 3.3379872  |
| DCAF12L2 | 2.0007987  |
| DCBLD1   | 0.5912161  |
| DCDC2B   | 0.5489769  |
| DCLK1    | 1.6361201  |
| DCLK2    | 1.648951   |
| DCLRE1B  | 0.738996   |
| DCLRE1C  | 2.3788395  |
| DCP1A    | 0.39382792 |
| DCP1B    | 0.40029192 |
| DCP2     | 1.5596333  |
| DCSTAMP  | 2.1949174  |
| DCTN1    | 0.8807831  |
| DCTN4    | 0.40970755 |
| DCTN6    | 0.45250893 |
| DCUN1D3  | 1.9385455  |
| DDAH2    | 1.3691759  |
| DDIT3    | 1.0368218  |
| DDIT4    | 1.6740785  |
| DDR1     | 2.8452172  |
| DDR2     | 2.8019047  |
| DDX11    | 0.5331712  |
| DDX17    | 0.7876148  |
| DDX21    | 0.31685162 |
| DDX23    | 1.1010973  |
| DDX25    | 2.041347   |
| DDX26B   | 1.5417051  |
| DDX3X    | 0.22757673 |
| DDX43    | 1.8497355  |
| DDX5     | 0.5849056  |
| DDX50    | 0.33287048 |
| DDX55    | 0.80431795 |
| DDX58    | 0.3122096  |
| DDX6     | 1.3298931  |
| DEDD2    | 0.44586802 |
| DEF6     | 1.3988285  |

|         |            |
|---------|------------|
| DEK     | 0.4304347  |
| DENND1B | 0.8611901  |
| DENND1C | 1.3774748  |
| DENND2A | 0.7226443  |
| DENND3  | 2.3063517  |
| DENND4B | 1.0304742  |
| DENND5A | 0.84696674 |
| DEP1    | 1.9304438  |
| DEPDC1B | 0.58805704 |
| DES     | 2.0005345  |
| DGCR14  | 0.8524804  |
| DGKA    | 1.3181834  |
| DGKD    | 1.0993862  |
| DGKE    | 1.0491135  |
| DGKEOS  | 0.89901614 |
| DGKG    | 1.7542806  |
| DGKH    | 3.9130177  |
| DHH     | 1.4241402  |
| DHRS7C  | 2.899373   |
| DHRS9   | 2.4625182  |
| DHX29   | 0.27109385 |
| DHX9    | 1.9355955  |
| DIAP1   | 0.82556915 |
| DIAP2   | 0.823061   |
| DIAP3   | 1.4934056  |
| DIEXF   | 0.5931277  |
| DIMT1   | 0.41957426 |
| DIO2    | 5.3935738  |
| DIP2A   | 0.67908716 |
| DIP2B   | 0.32727718 |
| DIRAS2  | 4.2778625  |
| DKK3    | 1.9020448  |
| DKKL1   | 1.1333075  |
| DLC1    | 0.81251216 |
| DLG4    | 1.7894213  |
| DLG5    | 0.98002386 |
| DLGAP4  | 1.2805023  |
| DLK1    | 0.8358376  |
| DLL1    | 2.304329   |
| DLL4    | 0.881145   |
| DMKN    | 4.823004   |
| DMRT2   | 1.2927451  |
| DMRT3   | 1.4208086  |
| DMTF1   | 1.6239743  |
| DMXL1   | 0.8349447  |

|         |            |
|---------|------------|
| DMXL2   | 1.4776983  |
| DNAAF3  | 0.27677155 |
| DNAH10  | 3.5668998  |
| DNAH11  | 4.5504475  |
| DNAH12  | 2.9711301  |
| DNAH14  | 0.2590239  |
| DNAH2   | 3.860838   |
| DNAH5   | 4.542144   |
| DNAH6   | 6.2196846  |
| DNAH7A  | 2.6609898  |
| DNAH7B  | 3.3509638  |
| DNAH8   | 2.3584216  |
| DNAH9   | 3.121596   |
| DNAIC2  | 4.6194434  |
| DNAJA4  | 2.4920907  |
| DNAJB1  | 0.94763184 |
| DNAJB13 | 2.1782405  |
| DNAJB3  | 2.367565   |
| DNAJB4  | 0.8482909  |
| DNAJB5  | 1.1269631  |
| DNAJB6  | 0.6325612  |
| DNAJB9  | 0.14803648 |
| DNAJC1  | 0.18701172 |
| DNAJC14 | 0.24813557 |
| DNAJC2  | 0.92274094 |
| DNAJC21 | 0.4163704  |
| DNAJC27 | 1.0526974  |
| DNAJC5  | 0.37712574 |
| DNAJC5B | 1.8916113  |
| DNAJC9  | 0.37152958 |
| DNALI1  | 5.287115   |
| DNASE2A | 1.0080786  |
| DND1    | 0.22550344 |
| DNHD1   | 0.79412556 |
| DNM1    | 0.6233554  |
| DNM3    | 2.1742585  |
| DNM3OS  | 1.0634813  |
| DNMT3L  | 2.4620216  |
| DNTTIP2 | 0.39194155 |
| DOC2B   | 4.2499394  |
| DOCK1   | 0.78739405 |
| DOCK10  | 1.9160328  |
| DOCK11  | 1.8777924  |
| DOCK2   | 1.7125173  |
| DOCK4   | 0.7388263  |

|         |            |
|---------|------------|
| DOCK5   | 1.062757   |
| DOCK8   | 0.3238616  |
| DOCK9   | 2.6755314  |
| DOK1    | 0.7528515  |
| DOK3    | 0.9731202  |
| DOK4    | 1.8888903  |
| DOK7    | 3.2072673  |
| DONSON  | 1.5054975  |
| DOPEY1  | 1.1165445  |
| DPCR1   | 0.837255   |
| DPEP1   | 4.5261807  |
| DPEP2   | 2.668651   |
| DPH2    | 0.20200872 |
| DPP8    | 0.9015608  |
| DPT     | 2.8461094  |
| DPYSL2  | 2.773345   |
| DPYSL3  | 3.1249232  |
| DR1     | 0.3186865  |
| DRAM1   | 2.8887582  |
| DRC1    | 2.5687175  |
| DROSHA  | 0.9819279  |
| DSCAM   | 0.50259805 |
| DSEL    | 1.5554342  |
| DST     | 0.98077106 |
| DSTN    | 0.4081297  |
| DSTYK   | 1.9159627  |
| DTNA    | 2.5776768  |
| DTX1    | 0.89718246 |
| DTX2    | 1.4723096  |
| DTX3    | 0.4128518  |
| DTX3L   | 0.3210373  |
| DUSP1   | 3.4646773  |
| DUSP11  | 1.6798344  |
| DUSP14  | 0.6407428  |
| DUSP16  | 1.514277   |
| DUSP18  | 2.4849722  |
| DUSP2   | 3.9173408  |
| DUSP26  | 2.6290264  |
| DUSP4   | 2.5910902  |
| DUSP5   | 2.1626446  |
| DUSP7   | 1.2047253  |
| DUSP8   | 3.74235    |
| DVL3    | 1.4280496  |
| DYDC2   | 2.617682   |
| DYNC1H1 | 0.6354852  |



|          |            |
|----------|------------|
| DYNC1I2  | 0.57231855 |
| DYNC1LI1 | 1.7363896  |
| DYNC1LI2 | 1.4821701  |
| DYNC2H1  | 1.4277749  |
| DYNC2LI1 | 3.4969916  |
| DYNLL1   | 1.8184192  |
| DYNLRB2  | 8.942678   |
| DYNLT1A  | 1.0167522  |
| DYNLT1C  | 0.6828737  |
| DYNLT1F  | 0.5010519  |
| DYRK1A   | 0.3604412  |
| DYRK3    | 0.98368645 |
| DYX1C1   | 1.7654531  |
| DZANK1   | 3.1570268  |
| DZIP1    | 0.96464825 |
| E4F1     | 0.59513044 |
| EAR1     | 3.843563   |
| EAR10    | 3.9897094  |
| EAR12    | 4.0689535  |
| EAR2     | 4.084855   |
| EAR6     | 1.9912109  |
| EBF1     | 3.8580055  |
| EBF2     | 0.56111145 |
| EBI3     | 3.0398636  |
| ECM2     | 4.161104   |
| ECSCR    | 2.4945254  |
| ECT2L    | 2.1520157  |
| EDIL3    | 2.8255935  |
| EDN1     | 5.1011233  |
| EDN3     | 1.0081112  |
| EDNRA    | 2.0790148  |
| EEA1     | 0.9699216  |
| EED      | 0.32592106 |
| EEF1A2   | 2.0460024  |
| EEF1E1   | 1.4127922  |
| EFCAB1   | 2.7990296  |
| EFCAB10  | 4.7056694  |
| EFCAB12  | 2.0949721  |
| EFCAB14  | 0.83831596 |
| EFCAB4A  | 1.3989425  |
| EFCAB5   | 0.9293554  |
| EFCAB9   | 0.32353926 |
| EFEMP1   | 1.9583249  |
| EFEMP2   | 1.0477118  |
| EFHB     | 3.6401963  |

|           |            |
|-----------|------------|
| EFHC1     | 3.6942854  |
| EFHC2     | 0.6389606  |
| EFHD1     | 0.47271657 |
| EFHD2     | 0.6785426  |
| EFNA4     | 1.3889017  |
| EFNB1     | 1.4157043  |
| EFNB2     | 2.939704   |
| EFNB3     | 1.6829488  |
| EFR3B     | 3.76189    |
| EFS       | 0.9334979  |
| EFTUD1    | 0.35833502 |
| EFTUD2    | 1.2253437  |
| EGFBP2    | 1.6103725  |
| EGFL6     | 4.1261     |
| EGFL7     | 1.222095   |
| EGFLAM    | 0.66458535 |
| EGR2      | 2.9739003  |
| EHBP1L1   | 0.5681691  |
| EHD1      | 1.5257306  |
| EHD2      | 4.336135   |
| EHD4      | 2.1813517  |
| EHF       | 3.48313    |
| EID1      | 1.3208766  |
| EID2      | 3.6568482  |
| EIF2AK2   | 0.8764515  |
| EIF2AK4   | 0.3499322  |
| EIF2B2    | 0.15446377 |
| EIF2S3Y   | 0.35957122 |
| EIF3C     | 0.2520628  |
| EIF4A1    | 0.24480867 |
| EIF4A2    | 0.4295416  |
| EIF4ENIF1 | 1.3617916  |
| EIF5A2    | 0.70410013 |
| ELF1      | 1.0606146  |
| ELF2      | 0.8431301  |
| ELF3      | 1.9041643  |
| ELF4      | 1.3423095  |
| ELF5      | 5.8666444  |
| ELK4      | 0.90787077 |
| ELMO1     | 1.0957649  |
| ELMO2     | 0.8048754  |
| ELMOD1    | 3.5390482  |
| ELMSAN1   | 1.4110994  |
| ELN       | 1.6046672  |
| ELOVL7    | 1.7733879  |

|          |            |
|----------|------------|
| EMB      | 3.826858   |
| EMCN     | 1.5065508  |
| EMID1    | 2.8712897  |
| EMILIN2  | 2.034978   |
| EML1     | 2.5238566  |
| EML2     | 0.17958307 |
| EMP1     | 4.0415316  |
| EMP2     | 4.25053    |
| EMP3     | 1.5722098  |
| ENAH     | 3.5891085  |
| ENC1     | 1.4886117  |
| ENDOD1   | 1.7048507  |
| ENG      | 0.6053729  |
| ENKD1    | 0.5458646  |
| ENKUR    | 4.693643   |
| ENO2     | 1.4274094  |
| ENO3     | 0.70957756 |
| ENO4     | 3.1940129  |
| ENPP4    | 1.3614345  |
| ENTPD1   | 0.9564991  |
| ENTPD3   | 3.9665565  |
| EOGT     | 1.3625116  |
| EOMES    | 1.6766515  |
| EP300    | 0.9907322  |
| EP400    | 0.70470905 |
| EPAS1    | 1.0311389  |
| EPB4.1L1 | 0.23738408 |
| EPB4.1L2 | 2.359836   |
| EPC1     | 0.86188745 |
| EPCAM    | 2.8514748  |
| EPDR1    | 3.7245247  |
| EPGN     | 1.4026849  |
| EPHA2    | 0.5169301  |
| EPHA3    | 2.5014992  |
| EPHA4    | 3.3968866  |
| EPHB1    | 1.218219   |
| EPHX4    | 3.4232366  |
| EPN2     | 1.5584702  |
| EPN3     | 0.34777737 |
| EPS15    | 0.37200642 |
| EPS15L1  | 0.17584419 |
| EPS8     | 1.6985526  |
| EPS8L1   | 4.1652966  |
| EQTN     | 0.42332053 |
| ERBB2    | 2.6616926  |

|         |            |
|---------|------------|
| ERBB2IP | 0.6514487  |
| ERCC1   | 1.3215799  |
| ERCC6   | 0.20517659 |
| EREG    | 2.3322918  |
| ERG     | 1.8724065  |
| ERI1    | 0.3437519  |
| ERICH1  | 1.0127869  |
| ERICH2  | 2.1145608  |
| ERICH3  | 3.5329044  |
| ERMAP   | 0.21632195 |
| ERO1L   | 0.46699333 |
| ERV3    | 0.46072078 |
| ESAM    | 2.4167619  |
| ESCO1   | 0.8653884  |
| ESM1    | 3.9056726  |
| ESR2    | 0.992671   |
| ESRP1   | 2.8097527  |
| ESYT1   | 0.57592916 |
| ESYT2   | 1.3365192  |
| ESYT3   | 2.9341445  |
| ETF1    | 0.17185163 |
| ETL4    | 1.2376728  |
| ETNK1   | 0.7116537  |
| ETOH11  | 0.4706397  |
| ETS1    | 1.7242022  |
| ETS2    | 1.5012326  |
| ETV1    | 1.5958076  |
| ETV3    | 2.7789402  |
| ETV5    | 2.1782932  |
| ETV6    | 0.883729   |
| EVA1B   | 0.5407696  |
| EVA1C   | 3.2479339  |
| EVC2    | 1.2866578  |
| EVI2A   | 0.74271345 |
| EVI5L   | 0.16838598 |
| EVL     | 0.24237919 |
| EVPL    | 3.0860786  |
| EXOC1   | 0.25639772 |
| EXOC2   | 0.58175516 |
| EXOC3L4 | 0.22178745 |
| EXOC4   | 0.37581635 |
| EXOC5   | 0.50718164 |
| EXOC6B  | 1.2980027  |
| EXOC8   | 0.38388395 |
| EXOG    | 0.717942   |

|         |            |
|---------|------------|
| EXOSC10 | 0.17273903 |
| EXPH5   | 1.3899021  |
| EXT2    | 0.24679232 |
| EYA2    | 6.493166   |
| EYA3    | 0.22313166 |
| EYA4    | 0.73070955 |
| EZH1    | 0.6692395  |
| EZH2    | 0.41282225 |
| EZR     | 1.891098   |
| F13A1   | 4.9075885  |
| F2R     | 2.6890597  |
| F2RL2   | 0.5347533  |
| F3      | 3.605187   |
| FABP12  | 2.5406795  |
| FABP3   | 6.2916336  |
| FABP4   | 2.0857759  |
| FADS3   | 3.0911999  |
| FAIM    | 0.18850231 |
| FAIM2   | 2.4927106  |
| FAIM3   | 0.98790646 |
| FAM101A | 3.5248313  |
| FAM101B | 3.1478364  |
| FAM102B | 1.0920577  |
| FAM105A | 3.8245046  |
| FAM107A | 2.272407   |
| FAM110A | 0.37032318 |
| FAM111A | 1.0801606  |
| FAM115A | 0.7065191  |
| FAM117A | 1.4564066  |
| FAM117B | 1.1812458  |
| FAM120B | 0.32218266 |
| FAM124B | 2.4573398  |
| FAM126A | 0.32125187 |
| FAM129A | 1.5416474  |
| FAM129B | 2.521637   |
| FAM129C | 1.1288972  |
| FAM131A | 3.0232615  |
| FAM132A | 1.2513738  |
| FAM133B | 1.4216132  |
| FAM134B | 0.430861   |
| FAM13B  | 0.61310625 |
| FAM13C  | 3.5615277  |
| FAM150A | 3.2408378  |
| FAM154B | 3.7759862  |
| FAM159A | 1.6415615  |

|          |            |
|----------|------------|
| FAM160A1 | 0.6918855  |
| FAM161A  | 1.9522455  |
| FAM161B  | 2.4709692  |
| FAM162B  | 6.421226   |
| FAM166B  | 2.5244002  |
| FAM167A  | 1.5316949  |
| FAM168B  | 0.5175457  |
| FAM170B  | 0.6795027  |
| FAM171B  | 1.3341806  |
| FAM174A  | 0.41477966 |
| FAM174B  | 2.5640955  |
| FAM178A  | 0.27455616 |
| FAM178B  | 1.3504157  |
| FAM179A  | 5.0527716  |
| FAM179B  | 0.67070484 |
| FAM183B  | 6.918971   |
| FAM184A  | 1.1945531  |
| FAM188A  | 0.34971476 |
| FAM189A2 | 4.8705463  |
| FAM189B  | 1.0586824  |
| FAM196A  | 1.8147309  |
| FAM198B  | 3.1715896  |
| FAM19A3  | 1.4256673  |
| FAM19A5  | 1.7275422  |
| FAM206A  | 0.60642576 |
| FAM208A  | 0.8427758  |
| FAM208B  | 1.3259363  |
| FAM212B  | 3.3771486  |
| FAM216A  | 0.8676276  |
| FAM216B  | 4.875821   |
| FAM217A  | 0.9715166  |
| FAM217B  | 1.6815012  |
| FAM219B  | 0.3594265  |
| FAM220A  | 0.30773497 |
| FAM221A  | 1.70732    |
| FAM222B  | 0.74340534 |
| FAM26E   | 1.8154972  |
| FAM3B    | 0.5159972  |
| FAM43A   | 0.8620014  |
| FAM46B   | 5.7459245  |
| FAM46C   | 0.94117785 |
| FAM49A   | 1.3796706  |
| FAM49B   | 0.84882903 |
| FAM53B   | 0.7514205  |
| FAM57A   | 0.25265193 |

|         |            |
|---------|------------|
| FAM60A  | 3.8156972  |
| FAM63B  | 0.9461751  |
| FAM65A  | 0.9386916  |
| FAM65B  | 4.307409   |
| FAM69B  | 1.890131   |
| FAM71B  | 0.38943768 |
| FAM71F2 | 1.8646505  |
| FAM73A  | 1.1742387  |
| FAM76A  | 0.9274254  |
| FAM76B  | 0.8660321  |
| FAM78B  | 3.7960322  |
| FAM81A  | 0.3044963  |
| FAM81B  | 2.1320338  |
| FAM83E  | 3.477413   |
| FAM92B  | 5.783351   |
| FAM98B  | 0.77515554 |
| FANK1   | 3.1374674  |
| FAP     | 3.2040133  |
| FAR1    | 2.636557   |
| FARP1   | 1.560195   |
| FAS     | 1.6066656  |
| FASL    | 1.6959562  |
| FAT1    | 0.32228613 |
| FAT3    | 1.6393588  |
| FAT4    | 0.26305985 |
| FBF1    | 0.62683344 |
| FBL     | 0.2129221  |
| FBLIM1  | 2.7314725  |
| FBLN1   | 2.7330575  |
| FBLN5   | 1.6340613  |
| FBN1    | 2.647101   |
| FBP2    | 1.6542561  |
| FBRS    | 0.5453687  |
| FBRS1   | 0.48134947 |
| FBXL12  | 0.71658087 |
| FBXL13  | 2.0158055  |
| FBXL14  | 0.24175549 |
| FBXL16  | 3.0996125  |
| FBXL2   | 0.55031323 |
| FBXL20  | 0.464962   |
| FBXL22  | 0.7698264  |
| FBXL3   | 1.1447215  |
| FBXL5   | 1.5780416  |
| FBXL7   | 0.9409442  |
| FBXO10  | 0.9104066  |

|        |            |
|--------|------------|
| FBXO11 | 0.38886738 |
| FBXO2  | 0.68254066 |
| FBXO24 | 0.666909   |
| FBXO27 | 2.0718925  |
| FBXO30 | 0.556057   |
| FBXO32 | 0.72601604 |
| FBXO33 | 0.6670604  |
| FBXO39 | 0.90815496 |
| FBXO42 | 0.49019623 |
| FBXO46 | 0.62302876 |
| FBXO5  | 0.70602655 |
| FBXW10 | 1.2565613  |
| FBXW11 | 0.4179263  |
| FBXW17 | 0.68937063 |
| FBXW7  | 0.78523874 |
| FCER1A | 1.1880157  |
| FCER1G | 1.5702972  |
| FCER2A | 0.65586686 |
| FCGBP  | 1.6182067  |
| FCGR4  | 0.29008484 |
| FCHO1  | 0.7111778  |
| FCHO2  | 1.4298615  |
| FCHSD1 | 0.52341557 |
| FCOR   | 0.80798745 |
| FCRLA  | 2.4179552  |
| FCRLB  | 0.87686324 |
| FCRLS  | 2.764464   |
| FEM1B  | 0.750062   |
| FENDRR | 2.3622317  |
| FER1L4 | 1.2114081  |
| FES    | 0.27495527 |
| FEV    | 2.0802212  |
| FFAR2  | 2.0963054  |
| FFAR3  | 1.1325519  |
| FFAR4  | 3.428452   |
| FGD3   | 1.7203603  |
| FGD4   | 1.2270436  |
| FGD5   | 0.43267274 |
| FGF10  | 3.5441253  |
| FGF11  | 1.8084731  |
| FGF12  | 1.1424072  |
| FGF17  | 1.1147311  |
| FGF18  | 2.1681595  |
| FGF7   | 4.182008   |
| FGFBP1 | 5.445271   |



|         |            |
|---------|------------|
| FGFR1   | 2.2481775  |
| FGFR2   | 0.9428587  |
| FGL2    | 0.704257   |
| FGR     | 1.667614   |
| FHAD1   | 1.7421923  |
| FHDC1   | 4.8083305  |
| FHL1    | 4.510974   |
| FHL3    | 0.80168366 |
| FHL5    | 0.8465586  |
| FHOD1   | 1.0775485  |
| FHOD3   | 1.7515249  |
| FIBIN   | 3.9650111  |
| FIGF    | 4.3744617  |
| FIGNL2  | 0.34140134 |
| FILIP1  | 1.1370211  |
| FILIP1L | 1.6733541  |
| FIP1L1  | 0.25247622 |
| FIRRE   | 1.0667324  |
| FIS1    | 1.0162582  |
| FJX1    | 2.4813204  |
| FKBP10  | 1.1449957  |
| FKBP14  | 0.5723462  |
| FKBP1B  | 1.6074076  |
| FKBP5   | 0.90002584 |
| FKBP6   | 2.2725172  |
| FKBP7   | 0.94030285 |
| FKBP9   | 0.5639229  |
| FKTN    | 1.7360587  |
| FLI1    | 2.0366993  |
| FLII    | 0.22796297 |
| FLNA    | 2.0658784  |
| FLNB    | 1.79989    |
| FLNC    | 3.781347   |
| FLOT1   | 0.51167536 |
| FLRT2   | 1.1136732  |
| FLRT3   | 5.64748    |
| FLT1    | 2.5088482  |
| FLT3    | 1.0449159  |
| FMNL1   | 1.5481734  |
| FMNL2   | 3.3801737  |
| FMNL3   | 0.90082693 |
| FMO2    | 4.1295104  |
| FMR1    | 0.78052044 |
| FNBP1L  | 2.2842183  |
| FNBP4   | 0.30816507 |

|         |            |
|---------|------------|
| FNDC1   | 1.285259   |
| FNDC3B  | 0.764822   |
| FNDC5   | 1.485116   |
| FNDC7   | 1.7899723  |
| FOS     | 4.4170623  |
| FOSB    | 0.74196196 |
| FOSL1   | 2.0895443  |
| FOSL2   | 3.3507004  |
| FOXA1   | 1.2428341  |
| FOXC1   | 1.6808763  |
| FOXC2   | 1.9794834  |
| FOXD2   | 1.197175   |
| FOXD2OS | 1.2607536  |
| FOXF1   | 4.555743   |
| FOXF2   | 5.00276    |
| FOXI2   | 1.5851433  |
| FOXJ1   | 5.083496   |
| FOXJ3   | 1.3958864  |
| FOXK1   | 0.33248615 |
| FOXL1   | 0.77195287 |
| FOXN2   | 1.020967   |
| FOXN3   | 0.6036906  |
| FOXN4   | 2.9731877  |
| FOXO3   | 1.7065423  |
| FOXO6   | 2.123439   |
| FOXP1   | 1.7298594  |
| FOXP3   | 2.0615284  |
| FOXP4   | 0.40776348 |
| FOXRED2 | 1.2204239  |
| FOXS1   | 1.0537295  |
| FPR1    | 2.2873406  |
| FPR2    | 3.0803185  |
| FPR3    | 2.4149945  |
| FPR-RS6 | 1.441989   |
| FRAS1   | 3.1649659  |
| FRAT2   | 0.54260206 |
| FREM1   | 3.3613553  |
| FRG1    | 0.55286264 |
| FRMD4A  | 0.8916073  |
| FRMD5   | 2.607928   |
| FRMD8   | 0.49154806 |
| FRMPD1  | 1.5101664  |
| FRY     | 2.3093982  |
| FRYL    | 0.19330502 |
| FSCN1   | 3.042067   |

|         |            |
|---------|------------|
| FSD1L   | 2.2698185  |
| FSIP1   | 1.0904593  |
| FSTL1   | 1.8958206  |
| FSTL3   | 2.932612   |
| FTX     | 1.0411422  |
| FUBP1   | 1.1796875  |
| FUBP3   | 0.5206704  |
| FUCA2   | 0.79234266 |
| FUNDC1  | 0.5093961  |
| FUNDC2  | 1.1648297  |
| FUS     | 0.24701929 |
| FUT11   | 1.1347785  |
| FUT4    | 2.8637483  |
| FUT8    | 1.0859213  |
| FXR2    | 0.24174404 |
| FXD2    | 0.67597914 |
| FXD3    | 2.2840567  |
| FXD4    | 2.3867292  |
| FXD5    | 2.0181046  |
| FXD6    | 2.3441687  |
| FYB     | 1.3031168  |
| FYN     | 1.2702165  |
| FZD1    | 1.0211997  |
| FZD2    | 2.416571   |
| FZD3    | 2.8792229  |
| FZD4    | 1.9956942  |
| FZD5    | 0.8701155  |
| FZD6    | 0.9644551  |
| FZD9    | 1.4055033  |
| G2E3    | 1.956295   |
| G3BP1   | 0.2554779  |
| G6B     | 1.2400031  |
| G6PD2   | 1.2107544  |
| G6PDX   | 0.21736526 |
| GAB1    | 0.87524223 |
| GAB2    | 0.74061203 |
| GABBR1  | 1.758955   |
| GABPB1  | 1.360188   |
| GABPB2  | 2.087957   |
| GABRE   | 0.6903727  |
| GABRP   | 4.4001827  |
| GADD45A | 1.9841809  |
| GADD45B | 3.4639516  |
| GADD45G | 1.5053544  |
| GAL     | 0.48513412 |

|         |            |
|---------|------------|
| GALNT1  | 1.5815673  |
| GALNT12 | 2.4099464  |
| GALNT15 | 4.941923   |
| GALNT16 | 3.7993393  |
| GALNT18 | 3.3452296  |
| GALNT3  | 3.027717   |
| GALNT6  | 1.1787205  |
| GALNT9  | 0.5160787  |
| GAN     | 2.216556   |
| GAP43   | 4.8955483  |
| GAPT    | 1.6096509  |
| GAPVD1  | 0.42050266 |
| GAR1    | 0.43612194 |
| GARNL3  | 3.253386   |
| GAS2L1  | 1.2269378  |
| GAS7    | 2.3132434  |
| GAS8    | 1.4583349  |
| GATA1   | 1.565419   |
| GATA2   | 5.3385344  |
| GATA3   | 2.9162316  |
| GATAD2B | 1.3648367  |
| GATSL2  | 1.5100117  |
| GBA2    | 0.20690393 |
| GBAS    | 0.52000856 |
| GBF1    | 0.19413042 |
| GBP10   | 0.65309286 |
| GBP2    | 1.5305533  |
| GBP3    | 0.7985816  |
| GBP4    | 2.6430588  |
| GBP5    | 3.2836022  |
| GBP6    | 0.7486844  |
| GBP7    | 1.9098268  |
| GBP9    | 1.3915854  |
| GCA     | 1.8925643  |
| GCC1    | 0.5881772  |
| GCNT1   | 1.1800711  |
| GCNT2   | 2.0426092  |
| GCSAM   | 1.7939129  |
| GDA     | 0.80103827 |
| GDAP10  | 1.5362344  |
| GDF9    | 0.8706496  |
| GDI1    | 0.6538186  |
| GDNF    | 4.2221875  |
| GDPD1   | 4.4891033  |
| GDPD2   | 8.261341   |

|          |            |
|----------|------------|
| GDPD3    | 0.21174383 |
| GDPD5    | 1.288969   |
| GEM      | 3.2437162  |
| GFI1     | 2.2524962  |
| GFI1B    | 1.4738617  |
| GFPT1    | 0.6179843  |
| GFPT2    | 4.462103   |
| GFRA4    | 3.3963122  |
| GGA3     | 0.72324514 |
| GGN      | 0.8226578  |
| GGPS1    | 1.9342437  |
| GGT1     | 2.153729   |
| GGT5     | 1.107101   |
| GGT7     | 1.1768382  |
| GGTA1    | 1.7699394  |
| GHRL     | 1.6265006  |
| GIF      | 0.8511205  |
| GIMAP1   | 0.6817851  |
| GIMAP1OS | 0.5623045  |
| GIMAP3   | 1.3262272  |
| GIMAP4   | 2.166448   |
| GIMAP5   | 3.1792293  |
| GIMAP6   | 2.1549773  |
| GIMAP7   | 0.49431086 |
| GIMAP8   | 2.2660718  |
| GIPC2    | 1.4310665  |
| GIT1     | 1.4379025  |
| GJA1     | 3.6774445  |
| GJA5     | 2.7816086  |
| GJB3     | 5.3755236  |
| GJB4     | 0.6982589  |
| GJB6     | 6.01404    |
| GJC1     | 3.5878682  |
| GK5      | 0.9201124  |
| GLA      | 0.28226328 |
| GLB1L    | 0.54701424 |
| GLB1L2   | 3.736175   |
| GLCCI1   | 1.0942535  |
| GLG1     | 0.69153214 |
| GLI1     | 1.8686604  |
| GLI3     | 2.55321    |
| GLIPR1   | 2.4096131  |
| GLIPR2   | 1.074873   |
| GLIS2    | 1.4184175  |
| GLIS3    | 0.82787275 |

|          |            |
|----------|------------|
| GLS      | 2.3433857  |
| GLTSCR1  | 0.8120122  |
| GLTSCR1L | 0.34912777 |
| GM10044  | 2.079978   |
| GM10046  | 1.3571756  |
| GM10065  | 2.1995108  |
| GM10091  | 1.7113123  |
| GM101    | 2.4553688  |
| GM10158  | 0.19309139 |
| GM10183  | 0.8576367  |
| GM10204  | 0.5957997  |
| GM10228  | 0.19128513 |
| GM10257  | 0.46467304 |
| GM10325  | 1.3273604  |
| GM10336  | 0.5387373  |
| GM10354  | 1.9748101  |
| GM10371  | 1.3930326  |
| GM10404  | 0.34625578 |
| GM10406  | 1.1158886  |
| GM10425  | 1.0096426  |
| GM10427  | 0.8992543  |
| GM10428  | 0.5751002  |
| GM10461  | 0.38937283 |
| GM10537  | 1.069283   |
| GM10554  | 2.9671361  |
| GM10572  | 1.4433424  |
| GM10584  | 0.6440911  |
| GM10589  | 0.4747424  |
| GM10629  | 0.57416916 |
| GM10634  | 3.6519883  |
| GM10638  | 1.5784326  |
| GM10648  | 1.895814   |
| GM10673  | 2.7844439  |
| GM10684  | 0.22078371 |
| GM10700  | 1.9364955  |
| GM10781  | 1.3457398  |
| GM10791  | 2.849493   |
| GM10792  | 2.7171922  |
| GM10796  | 1.2456477  |
| GM10839  | 3.8102026  |
| GM10847  | 1.1249816  |
| GM10851  | 4.1777544  |
| GM10866  | 1.762825   |
| GM10872  | 0.54137707 |
| GM10941  | 0.80522895 |

|         |            |
|---------|------------|
| GM11110 | 2.5199168  |
| GM11123 | 0.8749809  |
| GM11128 | 0.4135015  |
| GM11536 | 1.0286708  |
| GM11564 | 0.6117177  |
| GM11627 | 2.8237495  |
| GM11696 | 1.228581   |
| GM11744 | 2.7480474  |
| GM11747 | 1.4545054  |
| GM11938 | 1.2751236  |
| GM11974 | 0.2507038  |
| GM11992 | 0.99762774 |
| GM12185 | 1.075424   |
| GM12250 | 1.699007   |
| GM12253 | 0.95927167 |
| GM12271 | 0.66768074 |
| GM12592 | 1.6603725  |
| GM12657 | 0.21168661 |
| GM12666 | 0.8505068  |
| GM12695 | 0.6698649  |
| GM128   | 0.54802203 |
| GM1305  | 1.1029243  |
| GM13154 | 1.6148887  |
| GM13157 | 0.5574899  |
| GM13212 | 0.6497295  |
| GM13271 | 0.6143055  |
| GM13272 | 1.0844216  |
| GM13286 | 0.33953786 |
| GM13298 | 1.1924415  |
| GM13304 | 2.4578342  |
| GM13546 | 1.0715482  |
| GM13547 | 1.3815522  |
| GM13570 | 2.364638   |
| GM13861 | 1.55514    |
| GM13889 | 5.305728   |
| GM14005 | 0.5215776  |
| GM14010 | 2.7356632  |
| GM14085 | 1.4592509  |
| GM14420 | 0.5693891  |
| GM14446 | 2.1066294  |
| GM14548 | 0.9677396  |
| GM14625 | 1.0957279  |
| GM14635 | 2.0376365  |
| GM14858 | 0.58178973 |
| GM14964 | 2.0271876  |

|         |            |
|---------|------------|
| GM15056 | 2.8112102  |
| GM15455 | 1.4667158  |
| GM15466 | 0.97307396 |
| GM15645 | 0.5456128  |
| GM15998 | 2.7849076  |
| GM16340 | 1.0677376  |
| GM16500 | 0.95063066 |
| GM16524 | 1.192637   |
| GM166   | 0.5991287  |
| GM1673  | 1.312562   |
| GM16894 | 2.7290308  |
| GM1715  | 2.1709673  |
| GM17501 | 0.9210646  |
| GM17758 | 1.1193275  |
| GM17778 | 1.0558805  |
| GM1966  | 3.1511865  |
| GM1987  | 2.910431   |
| GM2030  | 0.756366   |
| GM2044  | 0.92729855 |
| GM20555 | 1.0370078  |
| GM20556 | 1.8354738  |
| GM20558 | 7.2889657  |
| GM20611 | 1.4009678  |
| GM20767 | 3.7382913  |
| GM2347  | 0.2274692  |
| GM2511  | 2.946607   |
| GM2590  | 2.24116    |
| GM2694  | 0.99507666 |
| GM2701  | 0.710567   |
| GM3065  | 0.86294675 |
| GM3081  | 1.7063212  |
| GM3161  | 2.6493735  |
| GM3239  | 0.95243883 |
| GM3252  | 0.72097015 |
| GM3364  | 2.3952508  |
| GM3383  | 0.5641539  |
| GM3414  | 2.0181859  |
| GM3527  | 1.0518637  |
| GM3556  | 1.3939118  |
| GM3718  | 0.44854116 |
| GM3893  | 0.83738804 |
| GM3916  | 1.5562525  |
| GM4107  | 1.2947495  |
| GM4120  | 0.8362174  |
| GM4123  | 1.588551   |



|        |            |
|--------|------------|
| GM4146 | 1.0022101  |
| GM4203 | 0.47530484 |
| GM4425 | 0.65766525 |
| GM4430 | 0.4099717  |
| GM4470 | 0.3884344  |
| GM4473 | 0.3732767  |
| GM4610 | 5.232136   |
| GM4861 | 0.52986836 |
| GM4884 | 0.54727244 |
| GM4907 | 5.450813   |
| GM4944 | 0.23595095 |
| GM4956 | 6.3256917  |
| GM4983 | 1.668947   |
| GM5068 | 2.1621842  |
| GM5105 | 0.72568107 |
| GM5106 | 1.1578445  |
| GM5115 | 1.1040337  |
| GM5141 | 1.9872365  |
| GM5150 | 0.3225026  |
| GM5168 | 0.72273016 |
| GM525  | 0.8172145  |
| GM527  | 1.99752    |
| GM5416 | 5.9004397  |
| GM5431 | 0.36816263 |
| GM5483 | 7.5057425  |
| GM5486 | 0.33089113 |
| GM5532 | 1.482266   |
| GM5547 | 1.3485539  |
| GM5590 | 0.3033955  |
| GM5595 | 0.76245356 |
| GM5602 | 1.132257   |
| GM5608 | 1.0177174  |
| GM5637 | 0.7294388  |
| GM5784 | 0.92157793 |
| GM5797 | 0.94314957 |
| GM5833 | 0.60428023 |
| GM5858 | 1.1749601  |
| GM5878 | 1.8381186  |
| GM6115 | 0.45664024 |
| GM614  | 1.7374616  |
| GM6146 | 1.8272033  |
| GM6377 | 4.220102   |
| GM6403 | 4.0266476  |
| GM6524 | 0.8488226  |
| GM6557 | 0.66572785 |

|        |            |
|--------|------------|
| GM6567 | 0.76799655 |
| GM6625 | 0.6047511  |
| GM6712 | 0.6412103  |
| GM6729 | 1.5990098  |
| GM6756 | 1.8328853  |
| GM684  | 1.1620123  |
| GM7068 | 2.4033163  |
| GM711  | 0.54141164 |
| GM7111 | 1.7471571  |
| GM7265 | 1.0169835  |
| GM7285 | 2.0513916  |
| GM7420 | 2.1948564  |
| GM7609 | 0.595412   |
| GM7644 | 0.9016068  |
| GM7710 | 1.269547   |
| GM7894 | 0.34513307 |
| GM7931 | 1.4281168  |
| GM7932 | 1.9805965  |
| GM7967 | 1.1173661  |
| GM7969 | 0.99769974 |
| GM807  | 1.2040462  |
| GM8096 | 1.2679005  |
| GM8212 | 0.6720581  |
| GM8220 | 1.7443838  |
| GM8232 | 2.6285374  |
| GM8256 | 0.5645461  |
| GM8369 | 0.61615825 |
| GM8378 | 1.4191656  |
| GM8556 | 1.1589489  |
| GM867  | 3.8435884  |
| GM8675 | 0.75268316 |
| GM8884 | 3.1478229  |
| GM8995 | 3.2935328  |
| GM9049 | 0.31153727 |
| GM9099 | 2.5525568  |
| GM9257 | 1.7744126  |
| GM9456 | 1.0421097  |
| GM9510 | 1.8177979  |
| GM9525 | 0.6574745  |
| GM9530 | 1.3638482  |
| GM9648 | 0.9448867  |
| GM9693 | 1.214597   |
| GM9706 | 3.252325   |
| GM9733 | 1.73912    |
| GM9758 | 1.1093504  |

|         |            |
|---------|------------|
| GM9779  | 0.36652803 |
| GM9798  | 1.0696878  |
| GM9855  | 0.5144477  |
| GM9856  | 1.1442752  |
| GM9868  | 0.92362714 |
| GM9889  | 1.393228   |
| GM9908  | 1.4758556  |
| GM9910  | 1.5144742  |
| GM9917  | 2.0922766  |
| GM9920  | 0.8724694  |
| GM9975  | 1.1907213  |
| GMEB1   | 0.8466306  |
| GMFB    | 0.32596397 |
| GMFG    | 1.8946719  |
| GMIP    | 1.2183385  |
| GMNC    | 0.5735018  |
| GMPR    | 2.917388   |
| GNA13   | 1.1787     |
| GNA14   | 1.7972198  |
| GNAI1   | 2.7592998  |
| GNAI2   | 0.6987486  |
| GNAL    | 1.4259877  |
| GNAO1   | 2.8660038  |
| GNAQ    | 0.6307006  |
| GNAZ    | 1.6042454  |
| GNB1    | 0.5860982  |
| GNB4    | 1.4175034  |
| GNB5    | 1.3854225  |
| GNG11   | 0.4208293  |
| GNG12   | 0.61758375 |
| GNG13   | 5.0920005  |
| GNG2    | 0.965333   |
| GNG8    | 1.0619752  |
| GNGT2   | 0.73444223 |
| GNL1    | 0.93857384 |
| GNL3    | 0.3895545  |
| GNL3L   | 1.5634954  |
| GNPDA2  | 1.3849707  |
| GNPTAB  | 1.0298891  |
| GNRH1   | 0.39393568 |
| GOLGA3  | 0.5981035  |
| GOLM1   | 0.21997452 |
| GOLPH3  | 0.48262644 |
| GOLPH3L | 1.1500897  |
| GOLT1B  | 1.3742528  |

|            |            |
|------------|------------|
| GON4L      | 1.223711   |
| GP1BA      | 3.1375203  |
| GP2        | 0.45835733 |
| GP49A      | 3.642325   |
| GP5        | 2.2601197  |
| GP6        | 1.4478962  |
| GP9        | 2.6357265  |
| GPA33      | 0.77451086 |
| GPANK1     | 0.7379837  |
| GPATCH2L   | 0.43319464 |
| GPATCH4    | 0.35419798 |
| GPATCH8    | 0.6346469  |
| GPBP1      | 0.26654816 |
| GPC1       | 0.91588545 |
| GPC3       | 1.6939836  |
| GPCPD1     | 1.2338333  |
| GPHA2      | 0.979414   |
| GPKOW      | 0.50424194 |
| GPM6A      | 2.7561736  |
| GPM6B      | 4.089129   |
| GPNMB      | 2.0812664  |
| GPR113     | 1.94752    |
| GPR114     | 1.588942   |
| GPR116     | 2.8614364  |
| GPR126     | 2.9555206  |
| GPR132     | 2.989562   |
| GPR133     | 1.746551   |
| GPR137B    | 1.8126388  |
| GPR137B-PS | 2.2457275  |
| GPR141     | 3.3665352  |
| GPR146     | 0.7265949  |
| GPR15      | 0.27411103 |
| GPR153     | 1.8214884  |
| GPR160     | 0.41372013 |
| GPR171     | 3.3789468  |
| GPR174     | 1.9298542  |
| GPR179     | 3.0133421  |
| GPR18      | 3.1037755  |
| GPR183     | 1.5630867  |
| GPR20      | 1.6848176  |
| GPR25      | 1.1749926  |
| GPR26      | 0.51877    |
| GPR31B     | 1.8425398  |
| GPR33      | 1.8674276  |
| GPR34      | 1.1428905  |

|         |            |
|---------|------------|
| GPR35   | 0.6767497  |
| GPR4    | 2.5571082  |
| GPR56   | 1.862689   |
| GPR6    | 1.0182786  |
| GPR65   | 1.1478124  |
| GPR68   | 2.7891207  |
| GPR82   | 2.1760042  |
| GPR84   | 5.973679   |
| GPR85   | 2.048193   |
| GPR88   | 2.077779   |
| GPR97   | 0.3268528  |
| GPRASP1 | 1.9818311  |
| GPRASP2 | 1.1738589  |
| GPRC5A  | 3.7073345  |
| GPRC5B  | 4.4277053  |
| GPRC6A  | 2.5811515  |
| GPSM1   | 0.81090665 |
| GPSM3   | 1.0291958  |
| GPX2    | 3.446416   |
| GPX3    | 4.7718463  |
| GPX8    | 3.135363   |
| GRAMD1A | 1.7692885  |
| GRAMD1B | 1.7077556  |
| GRAMD2  | 3.9278302  |
| GRAP    | 2.100041   |
| GRAP2   | 1.6940999  |
| GRASP   | 1.2831588  |
| GRB10   | 0.54713225 |
| GREB1   | 1.9241495  |
| GREM2   | 0.49375677 |
| GRHL1   | 1.5742927  |
| GRHL2   | 4.122002   |
| GRIA1   | 2.8207948  |
| GRIA3   | 2.4272938  |
| GRIN2C  | 2.2845829  |
| GRIN2D  | 0.72613525 |
| GRIP1   | 1.3658657  |
| GRIPAP1 | 0.5239768  |
| GRK4    | 1.195015   |
| GRK5    | 2.9638624  |
| GRM6    | 0.25139308 |
| GRP     | 2.8118398  |
| GRRP1   | 6.032208   |
| GSDMA   | 0.8294809  |
| GSE1    | 0.5722275  |

|         |            |
|---------|------------|
| GSG1    | 0.84034777 |
| GSG2    | 1.2429721  |
| GSK3B   | 0.77440786 |
| GSN     | 4.454149   |
| GTF2B   | 0.3307166  |
| GTF2F1  | 0.4894781  |
| GTF2F2  | 0.7405014  |
| GTF3C5  | 0.20602226 |
| GTPBP2  | 0.50852203 |
| GTPBP4  | 0.47628164 |
| GTSF1   | 1.9656348  |
| GUCY1A2 | 1.5524368  |
| GUCY1A3 | 2.5571785  |
| GUCY1B3 | 2.3181005  |
| GULP1   | 3.0323596  |
| GVIN1   | 2.5415025  |
| GXYLT1  | 1.0553913  |
| GYG     | 2.2491775  |
| GYS1    | 1.2221203  |
| GZMA    | 2.2368813  |
| GZMB    | 2.4163685  |
| GZMC    | 1.0010533  |
| GZMK    | 2.8240867  |
| GZMM    | 1.749042   |
| H2AFY2  | 0.6116338  |
| H2AFY3  | 1.9783196  |
| H2-DMB2 | 0.36996984 |
| H2-EB2  | 3.456159   |
| H2-OB   | 0.5596552  |
| H2-Q5   | 0.9778447  |
| H2-T24  | 2.4553595  |
| H3F3A   | 0.32333612 |
| H3F3B   | 0.7368555  |
| H60A    | 2.7397923  |
| H60B    | 3.3558939  |
| H60C    | 1.450921   |
| HACE1   | 0.90512896 |
| HAP1    | 0.9691024  |
| HAS1    | 6.9865613  |
| HAS2    | 2.3518791  |
| HAUS3   | 0.4928484  |
| HAUS6   | 0.51504827 |
| HAVCR2  | 3.676156   |
| HBB-B1  | 0.61934423 |
| HBB-B2  | 0.47805166 |

|           |            |
|-----------|------------|
| HBEGF     | 2.4549608  |
| HBQ1B     | 1.7270248  |
| HCAR2     | 2.9529047  |
| HCK       | 2.0434127  |
| HCLS1     | 1.8566675  |
| HCST      | 1.4156446  |
| HDAC1     | 0.61588526 |
| HDAC2     | 0.5984459  |
| HDAC4     | 1.1451211  |
| HDAC7     | 2.1242337  |
| HDAC8     | 0.31025958 |
| HDC       | 4.571857   |
| HDGFRP3   | 2.4825268  |
| HDX       | 2.8094282  |
| HEATR1    | 0.35161686 |
| HEATR3    | 0.457654   |
| HECA      | 0.3791566  |
| HECW2     | 1.4330306  |
| HEG1      | 1.9298472  |
| HELZ2     | 0.36459637 |
| HEPACAM   | 1.2750959  |
| HEPH      | 1.265012   |
| HERC1     | 0.49286938 |
| HERC2     | 0.6131439  |
| HERC6     | 1.7282414  |
| HES1      | 0.7091329  |
| HES2      | 0.91026783 |
| HEY1      | 3.5059814  |
| HEY2      | 2.3197663  |
| HEYL      | 1.6909828  |
| HHIP      | 1.7860556  |
| HID1      | 1.6662335  |
| HIF1A     | 1.7125587  |
| HIF1AN    | 0.61602306 |
| HIF3A     | 4.271101   |
| HIGD1B    | 4.82734    |
| HILPDA    | 1.4653549  |
| HIP1      | 0.8364682  |
| HIPK1     | 1.2423506  |
| HIPK3     | 0.59395456 |
| HIRA      | 0.66862774 |
| HIST1H1B  | 1.5918217  |
| HIST1H1E  | 1.2182097  |
| HIST1H2AA | 0.4959886  |
| HIST1H2AB | 1.5925388  |

|            |            |
|------------|------------|
| HIST1H2AG  | 0.4606123  |
| HIST1H2BB  | 1.6175752  |
| HIST1H2BE  | 4.131048   |
| HIST1H3C   | 1.0257788  |
| HIST1H3D   | 0.5567484  |
| HIST1H3F   | 1.433013   |
| HIST1H3G   | 1.5395572  |
| HIST1H4C   | 1.2556515  |
| HIST1H4D   | 2.472602   |
| HIST1H4J   | 1.612195   |
| HIST1H4K   | 2.0207667  |
| HIST2H2BB  | 1.3688693  |
| HIST2H3B   | 1.2443199  |
| HIST2H4    | 1.8609495  |
| HIST3H2A   | 0.95375776 |
| HIST4H4    | 2.0022297  |
| HIVEP1     | 1.6215568  |
| HIVEP2     | 3.3544083  |
| HK2        | 1.0940738  |
| HKDC1      | 5.171977   |
| HLTF       | 0.7557521  |
| HLX        | 1.7883644  |
| HMCN1      | 2.647907   |
| HMG20A     | 0.30045176 |
| HMGA2-PS1  | 1.220223   |
| HMGB1-RS17 | 0.30955076 |
| HMGB2      | 2.1442785  |
| HMGCLL1    | 2.0696268  |
| HMGN2      | 0.38378763 |
| HMGN3      | 2.2196612  |
| HMGXB4     | 0.8429694  |
| HMHA1      | 1.337039   |
| HMX3       | 0.8803036  |
| HNRNPA1    | 0.36092043 |
| HNRNPA3    | 0.7380738  |
| HNRNPH1    | 0.84238386 |
| HNRNPH2    | 0.625896   |
| HNRNPH3    | 0.5082207  |
| HNRNPL     | 0.54836607 |
| HNRNPM     | 0.67385626 |
| HNRNPU     | 0.23666954 |
| HNRNPUL1   | 0.67191124 |
| HNRNPUL2   | 0.5367341  |
| HOMER3     | 0.69000983 |
| HOPX       | 2.4111943  |



|          |            |
|----------|------------|
| HOXA3    | 1.5705116  |
| HOXA4    | 0.8351655  |
| HOXA5    | 3.3695495  |
| HOXA7    | 0.703974   |
| HOXB2    | 1.6875052  |
| HOXB3    | 1.2271655  |
| HOXB4    | 1.776824   |
| HOXB5    | 2.2354088  |
| HOXB5OS  | 2.7618408  |
| HOXB6    | 3.5538003  |
| HOXB7    | 1.1116323  |
| HPCAL1   | 0.5847273  |
| HPGDS    | 0.49878907 |
| HPS3     | 0.5009608  |
| HPS5     | 0.37542677 |
| HRASLS5  | 1.0777624  |
| HRC      | 3.0394945  |
| HRCT1    | 3.0514522  |
| HS3ST1   | 1.125772   |
| HS6ST2   | 2.6814778  |
| HSCB     | 0.31704903 |
| HSD17B14 | 1.6094217  |
| HSDL1    | 0.47804403 |
| HSH2D    | 3.142343   |
| HSP90AA1 | 0.49090576 |
| HSPA12B  | 1.3357053  |
| HSPA1A   | 1.4282413  |
| HSPA1L   | 0.578073   |
| HSPA2    | 1.7292991  |
| HSPA4L   | 2.483107   |
| HSPB1    | 5.710805   |
| HSPB2    | 1.9411764  |
| HSPB7    | 2.5920897  |
| HSPG2    | 0.2468276  |
| HSPH1    | 1.2641282  |
| HTATSF1  | 1.3870807  |
| HTR2B    | 2.1169167  |
| HTR7     | 3.7829144  |
| HTRA1    | 1.7785993  |
| HTT      | 1.9934878  |
| HUS1     | 0.75569916 |
| HUWE1    | 0.21785307 |
| HVCN1    | 1.2492275  |
| HYDIN    | 3.0765927  |
| ICA1     | 1.496171   |

|          |            |
|----------|------------|
| ICAM1    | 3.5390153  |
| ICAM2    | 2.8440623  |
| ICAM4    | 0.50949264 |
| ICAM5    | 2.1623921  |
| ICOS     | 0.21866894 |
| ICOSL    | 3.2912521  |
| ID1      | 1.487598   |
| ID3      | 0.2837391  |
| ID4      | 0.20543432 |
| IDO1     | 2.0246933  |
| IDS      | 2.2146225  |
| IDUA     | 0.22605896 |
| IER2     | 0.89709806 |
| IER3     | 4.4366636  |
| IER5     | 2.1629624  |
| IER5L    | 3.0810118  |
| IFI202B  | 1.4457998  |
| IFI203   | 0.24345922 |
| IFI204   | 0.5484276  |
| IFI27L2A | 1.1288795  |
| IFI44    | 0.3425126  |
| IFI44L   | 3.2213695  |
| IFI47    | 0.91296864 |
| IFIH1    | 0.424366   |
| IFIT1    | 2.6922817  |
| IFIT2    | 1.1064816  |
| IFIT3    | 1.0699062  |
| IFITM1   | 2.2595387  |
| IFITM10  | 0.75733066 |
| IFITM5   | 3.1042323  |
| IFITM6   | 4.978847   |
| IFNA14   | 0.7726519  |
| IFNA5    | 0.5634656  |
| IFNAB    | 0.79102993 |
| IFNAR1   | 0.6276746  |
| IFNG     | 2.7526507  |
| IFNGR1   | 1.3264389  |
| IFNK     | 1.1500814  |
| IFNLR1   | 4.212093   |
| IFRD1    | 2.0961409  |
| IFT122   | 1.1968894  |
| IFT140   | 0.6512635  |
| IFT43    | 1.8584394  |
| IFT57    | 2.409995   |
| IFT74    | 0.28227425 |

|           |            |
|-----------|------------|
| IFT80     | 0.74266577 |
| IFT81     | 1.7058463  |
| IFT88     | 0.8981085  |
| IGF1R     | 3.2744799  |
| IGF2BP1   | 1.0513825  |
| IGF2BP2   | 1.5400147  |
| IGFBP3    | 0.3970313  |
| IGFBP5    | 1.744174   |
| IGFBP6    | 5.30266    |
| IGFLR1    | 0.7901468  |
| IGHV14-2  | 2.3652558  |
| IGH-VJ558 | 0.34947824 |
| IGSF1     | 1.1305602  |
| IGSF10    | 0.89479303 |
| IGSF3     | 1.9580207  |
| IGSF6     | 1.2900438  |
| IKBKE     | 0.6028137  |
| IKZF1     | 2.2715855  |
| IKZF2     | 1.3258734  |
| IKZF4     | 3.7321901  |
| IKZF5     | 1.9457588  |
| IL10      | 0.74110174 |
| IL10RA    | 0.48525906 |
| IL10RB    | 1.4384971  |
| IL11      | 1.8177376  |
| IL12B     | 2.040392   |
| IL12RB1   | 0.302567   |
| IL12RB2   | 0.8175061  |
| IL16      | 2.0020933  |
| IL17A     | 4.3824067  |
| IL17D     | 1.9790931  |
| IL17F     | 2.2826045  |
| IL17RA    | 1.2611256  |
| IL17RD    | 3.2914047  |
| IL17RE    | 4.3935905  |
| IL18R1    | 4.4500294  |
| IL18RAP   | 4.1401324  |
| IL1B      | 4.5395837  |
| IL1F6     | 1.5133834  |
| IL1F9     | 6.888989   |
| IL1R2     | 8.076264   |
| IL1RL1    | 2.8940904  |
| IL1RN     | 2.2756953  |
| IL20RB    | 1.5086188  |
| IL21R     | 1.0383027  |

|             |            |
|-------------|------------|
| IL22RA2     | 3.5503724  |
| IL23A       | 1.813232   |
| IL27RA      | 0.8112631  |
| IL2RA       | 4.114599   |
| IL2RB       | 1.3071642  |
| IL2RG       | 1.8949919  |
| IL33        | 3.0619025  |
| IL34        | 0.38494062 |
| IL3RA       | 0.67282295 |
| IL4I1       | 2.485302   |
| IL4RA       | 2.6294155  |
| IL6         | 7.458927   |
| IL6ST       | 1.2993889  |
| IL7         | 0.7407806  |
| IL7R        | 5.624848   |
| ILD1R1      | 4.06277    |
| ILF2        | 0.78600216 |
| IMAGE:61964 | 0.9267714  |
| IMPDH1      | 2.205958   |
| INA         | 0.8405571  |
| INADL       | 1.41751    |
| INCENP      | 0.31050777 |
| ING1        | 0.73872566 |
| ING3        | 1.6336737  |
| ING5        | 0.5824361  |
| INHA        | 1.5897858  |
| INHBB       | 4.967063   |
| INIP        | 0.87802553 |
| INO80       | 0.8207803  |
| INO80B      | 1.1058474  |
| INO80D      | 2.7873902  |
| INO80E      | 0.54423904 |
| INPP4A      | 1.7583201  |
| INPP4B      | 1.6533628  |
| INPP5B      | 0.21342564 |
| INPP5D      | 1.2535157  |
| INPP5J      | 1.331573   |
| INTS12      | 1.2160435  |
| INTS2       | 0.98668003 |
| INTS8       | 0.1764822  |
| IP6K3       | 3.5897067  |
| IPCEF1      | 1.2041988  |
| IPO13       | 1.0631313  |
| IPO7        | 0.4810009  |
| IQCA        | 4.143651   |

|          |            |
|----------|------------|
| IQCB1    | 1.8836155  |
| IQCF1    | 1.4054105  |
| IQCK     | 1.0933778  |
| IQGAP1   | 2.8081322  |
| IQSEC2   | 0.45500946 |
| IQUB     | 1.5924737  |
| IRAK3    | 2.4223738  |
| IRAK4    | 0.2841568  |
| IRF1     | 1.1703897  |
| IRF2     | 0.51628494 |
| IRF2BP2  | 0.6606736  |
| IRF2BPL  | 0.42574024 |
| IRF4     | 1.506511   |
| IRF5     | 0.8358426  |
| IRF8     | 0.38874102 |
| IRG1     | 4.040857   |
| IRS2     | 1.1174812  |
| IRX1     | 9.520087   |
| IRX2     | 4.2553544  |
| IRX3     | 7.314578   |
| IRX5     | 3.2739587  |
| ISG15    | 2.3837004  |
| ISG20    | 2.6716852  |
| ISLR2    | 1.5647159  |
| ISM1     | 5.8129153  |
| ITGA1    | 1.6040163  |
| ITGA10   | 0.655879   |
| ITGA11   | 2.1542244  |
| ITGA2    | 1.3487165  |
| ITGA3    | 2.3282404  |
| ITGA4    | 1.3670893  |
| ITGA6    | 1.8815241  |
| ITGA7    | 0.4074726  |
| ITGA8    | 3.734334   |
| ITGAE    | 2.69471    |
| ITGAL    | 0.7077427  |
| ITGAM    | 1.1774235  |
| ITGAV    | 0.38120747 |
| ITGAX    | 3.065495   |
| ITGB1    | 0.8095498  |
| ITGB1BP2 | 1.670507   |
| ITGB2    | 1.4421992  |
| ITGB2L   | 5.407725   |
| ITGB3    | 2.7306557  |
| ITGB4    | 2.2377954  |

|          |            |
|----------|------------|
| ITGB6    | 3.6156008  |
| ITGBL1   | 1.6071448  |
| ITK      | 2.0560484  |
| ITLN1    | 3.0062852  |
| ITM2A    | 2.5865526  |
| ITPKB    | 2.5042644  |
| ITPKC    | 0.3257842  |
| ITPR1    | 0.19206047 |
| ITPR3    | 1.3918619  |
| ITPRIP   | 3.1080108  |
| ITPRIPL2 | 2.075584   |
| ITSN2    | 0.968174   |
| IWS1     | 0.36331654 |
| JADE2    | 1.7320609  |
| JAG1     | 1.9351201  |
| JAG2     | 2.8565347  |
| JAK2     | 1.4616842  |
| JAK3     | 0.7628412  |
| JAKMIP1  | 1.56843    |
| JAM3     | 1.513782   |
| JDP2     | 2.2791114  |
| JMJD1C   | 1.1212344  |
| JPH2     | 0.5077951  |
| JUN      | 3.946128   |
| JUNB     | 2.4162307  |
| JUP      | 0.54481006 |
| KANK2    | 0.4832816  |
| KANK3    | 2.0495124  |
| KANK4    | 1.9336028  |
| KANSL1   | 1.1378367  |
| KANSL3   | 0.37660933 |
| KAT5     | 0.40405607 |
| KAT6A    | 0.95274353 |
| KAT6B    | 1.078944   |
| KAT7     | 0.37737656 |
| KATNA1   | 0.92611265 |
| KATNAL1  | 1.2249413  |
| KATNB1   | 0.47536898 |
| KATNBL1  | 0.74683666 |
| KAZALD1  | 0.7446537  |
| KAZN     | 2.7701306  |
| KBTBD11  | 3.3544207  |
| KBTBD2   | 0.25462437 |
| KBTBD8   | 0.6672561  |
| KCNA1    | 1.4722345  |

|          |            |
|----------|------------|
| KCNA3    | 3.0208893  |
| KCND3    | 1.8425786  |
| KCNE2    | 7.392354   |
| KCNE3    | 2.37567    |
| KCNE4    | 3.6224718  |
| KCNH3    | 2.0421262  |
| KCNIP3   | 1.0760417  |
| KCNIP4   | 0.96552134 |
| KCNJ13   | 4.887303   |
| KCNJ15   | 4.2314787  |
| KCNJ2    | 2.229875   |
| KCNJ5    | 3.4548328  |
| KCNJ8    | 0.3001361  |
| KCNK1    | 4.5039344  |
| KCNK12   | 1.1141665  |
| KCNK2    | 1.2713318  |
| KCNK3    | 2.8179498  |
| KCNK6    | 0.813961   |
| KCNMB1   | 2.407992   |
| KCNMB2   | 1.1808734  |
| KCNMB4   | 3.9702058  |
| KCNN3    | 1.895021   |
| KCNN4    | 0.6116309  |
| KCNQ1    | 1.6632195  |
| KCNQ1OT1 | 1.4958897  |
| KCNRG    | 4.552938   |
| KCNS3    | 5.440364   |
| KCNT1    | 0.42067385 |
| KCTD1    | 3.2612686  |
| KCTD10   | 2.5773058  |
| KCTD11   | 2.5630379  |
| KCTD12   | 0.7235093  |
| KCTD12B  | 0.6434946  |
| KCTD21   | 0.5341182  |
| KCTD4    | 1.1309521  |
| KCTD5    | 1.7174487  |
| KCTD8    | 1.895874   |
| KCTD9    | 0.33886242 |
| KDELC2   | 2.1199446  |
| KDELR3   | 0.97471094 |
| KDM1A    | 0.31899548 |
| KDM3A    | 1.7641625  |
| KDM3B    | 0.68449116 |
| KDM4C    | 0.7680521  |
| KDM5A    | 1.0563717  |

|           |            |
|-----------|------------|
| KDM5B     | 0.89783096 |
| KDM6A     | 1.0430803  |
| KDM6B     | 1.7630038  |
| KDM7A     | 1.4841866  |
| KEL       | 0.8766248  |
| KHDC3     | 3.534676   |
| KIDINS220 | 0.92126036 |
| KIF13A    | 1.0508432  |
| KIF15     | 0.8046808  |
| KIF16B    | 0.6235571  |
| KIF1A     | 4.1909933  |
| KIF21B    | 0.72986984 |
| KIF27     | 2.4595723  |
| KIF2A     | 0.5511522  |
| KIF3A     | 1.209094   |
| KIF3B     | 1.1382291  |
| KIF5A     | 0.64087796 |
| KIF5B     | 1.3063867  |
| KIF5C     | 1.239481   |
| KIF6      | 2.0184553  |
| KIF9      | 1.2330945  |
| KIFAP3    | 1.0510526  |
| KIN       | 0.3927312  |
| KIRREL    | 1.8370581  |
| KISS1R    | 1.7186437  |
| KIT       | 2.1481447  |
| KITL      | 7.216173   |
| KIZ       | 0.42952394 |
| KLC1      | 0.78367424 |
| KLC2      | 0.5794897  |
| KLC3      | 1.2968693  |
| KLF10     | 0.15906191 |
| KLF11     | 1.8607268  |
| KLF13     | 0.6440344  |
| KLF2      | 1.9909196  |
| KLF3      | 1.2532549  |
| KLF4      | 3.7407932  |
| KLF5      | 6.414487   |
| KLF6      | 2.7859955  |
| KLF7      | 2.792388   |
| KLF8      | 2.0176868  |
| KLF9      | 1.0689106  |
| KLHDC1    | 2.4452078  |
| KLHDC9    | 1.9415059  |
| KLHL1     | 1.5640883  |



|         |            |
|---------|------------|
| KLHL11  | 0.60479593 |
| KLHL18  | 0.4012041  |
| KLHL2   | 0.73831797 |
| KLHL24  | 1.6302118  |
| KLHL28  | 1.4645796  |
| KLHL29  | 2.7595236  |
| KLHL30  | 0.3884976  |
| KLHL32  | 1.4601634  |
| KLHL35  | 0.5168793  |
| KLHL38  | 2.1152208  |
| KLHL5   | 1.173521   |
| KLHL6   | 2.8274517  |
| KLHL7   | 0.23306131 |
| KLK1    | 1.5032029  |
| KLK11   | 3.794918   |
| KLK13   | 0.47262788 |
| KLK1B24 | 0.6204078  |
| KLK1B26 | 1.6284273  |
| KLK1B27 | 2.7984846  |
| KLK1B3  | 0.25290608 |
| KLK1B5  | 1.733767   |
| KLK4    | 1.3884919  |
| KLK8    | 2.562583   |
| KLK9    | 1.1403916  |
| KLRA1   | 1.9025726  |
| KLRA12  | 1.1910627  |
| KLRA15  | 2.5718102  |
| KLRA16  | 1.6039329  |
| KLRA17  | 2.7114005  |
| KLRA2   | 2.8712916  |
| KLRA22  | 1.7732506  |
| KLRA23  | 1.8522062  |
| KLRA4   | 2.531815   |
| KLRA6   | 0.21171474 |
| KLRA7   | 2.0129075  |
| KLRA8   | 2.5459232  |
| KLRA9   | 1.8056302  |
| KLRB1   | 1.7949798  |
| KLRB1A  | 2.1730437  |
| KLRB1B  | 1.2368538  |
| KLRB1C  | 1.5058172  |
| KLRB1F  | 2.8176663  |
| KLRC1   | 2.073619   |
| KLRC3   | 0.8171768  |
| KLRD1   | 1.6749182  |

|            |            |
|------------|------------|
| KLRE1      | 2.1640835  |
| KLRG1      | 2.5261602  |
| KLRI2      | 1.9849589  |
| KMT2A      | 3.0382931  |
| KMT2C      | 0.44618416 |
| KMT2D      | 0.774313   |
| KMT2E      | 0.86087227 |
| KNDC1      | 2.0842645  |
| KPNA4      | 0.8602872  |
| KRI1       | 1.1838503  |
| KRIT1      | 0.7342739  |
| KRR1       | 0.44310522 |
| KRT15      | 2.5389013  |
| KRT16      | 1.5073223  |
| KRT19      | 3.2394032  |
| KRT222     | 0.2191596  |
| KRT23      | 0.44038773 |
| KRT42      | 1.929111   |
| KRT5       | 0.84601855 |
| KRT7       | 4.821994   |
| KRT78      | 1.0165606  |
| KRT79      | 4.0864267  |
| KRT81      | 0.96656775 |
| KRT86      | 2.8965318  |
| KRTAP10-10 | 0.5858793  |
| KRTAP16-3  | 1.2479541  |
| KRTAP17-1  | 2.377662   |
| KRTAP19-4  | 1.8054523  |
| KRTAP28-13 | 0.3779292  |
| KRTAP5-1   | 1.0466046  |
| KRTCAP3    | 2.1215248  |
| KSR1       | 1.3225851  |
| KTN1       | 3.3067627  |
| L1CAM      | 1.2602446  |
| L1TD1      | 0.42582583 |
| L3MBTL3    | 1.1052461  |
| LAD1       | 0.74136376 |
| LAG3       | 0.33123922 |
| LAIR1      | 0.4434414  |
| LAMA2      | 2.66321    |
| LAMA3      | 3.646573   |
| LAMA4      | 2.652299   |
| LAMA5      | 3.2739367  |
| LAMB1      | 1.8184557  |
| LAMB2      | 2.1300597  |

|         |            |
|---------|------------|
| LAMB3   | 2.3862257  |
| LAMC1   | 1.6540756  |
| LAMC2   | 6.78693    |
| LAMC3   | 1.844254   |
| LAMP3   | 2.684619   |
| LANCL3  | 0.8536458  |
| LAPTM5  | 2.0228992  |
| LARP4B  | 0.17357397 |
| LARP6   | 3.1175945  |
| LARP7   | 0.6293502  |
| LAT     | 1.1295719  |
| LAT2    | 1.42572    |
| LATS2   | 2.4274015  |
| LAYN    | 1.3394089  |
| LBH     | 0.63837194 |
| LBR     | 1.6146388  |
| LBX1    | 1.075304   |
| LBX2    | 0.37881708 |
| LCA5    | 2.0161064  |
| LCA5L   | 1.0109384  |
| LCK     | 1.4364438  |
| LCN2    | 0.97295475 |
| LCN6    | 0.65153    |
| LCOR    | 1.3004026  |
| LCORL   | 0.4237194  |
| LCP1    | 2.2180786  |
| LCP2    | 1.6838231  |
| LCTL    | 0.7641144  |
| LDB2    | 2.649241   |
| LDB3    | 3.1550593  |
| LDHB    | 2.184616   |
| LDLRAD1 | 2.7398367  |
| LDLRAD4 | 1.0896194  |
| LEF1    | 3.198625   |
| LEFTY2  | 2.3932776  |
| LEKR1   | 1.8732057  |
| LEMD3   | 0.6894388  |
| LEPREL1 | 1.3161399  |
| LEPREL2 | 0.7128582  |
| LEPREL4 | 1.1748486  |
| LETM2   | 2.0731044  |
| LGALS1  | 0.8211632  |
| LGALS2  | 1.2091036  |
| LGALS3  | 1.2467928  |
| LGI2    | 1.8947039  |

|             |            |
|-------------|------------|
| LGI3        | 7.089317   |
| LGI4        | 1.1334748  |
| LGR6        | 1.2103992  |
| LHB         | 2.260093   |
| LHFP        | 2.4680572  |
| LHFPL3      | 1.2365413  |
| LHX3        | 0.76510954 |
| LHX4        | 0.36520576 |
| LILRA6      | 1.6099629  |
| LILRB4      | 2.547937   |
| LIMA1       | 1.2682719  |
| LIMCH1      | 7.4917254  |
| LIMD2       | 0.2151084  |
| LIME1       | 0.8169098  |
| LIMK1       | 0.79894066 |
| LIMK2       | 0.44411016 |
| LIMS1       | 1.8279357  |
| LIN28A      | 0.18994045 |
| LIN54       | 0.29143715 |
| LIN7C       | 0.42973948 |
| LIPE        | 0.2294178  |
| LIPF        | 1.9088721  |
| LIPG        | 5.0392323  |
| LIPH        | 5.4951315  |
| LIPO1       | 1.7558031  |
| LITAF       | 0.5700588  |
| LIX1        | 0.77913165 |
| LIX1L       | 2.694047   |
| LMCD1       | 2.5973792  |
| LMLN        | 1.5390129  |
| LMNB1       | 1.9399896  |
| LMO1        | 3.2372715  |
| LMO2        | 0.44089222 |
| LMO4        | 1.188314   |
| LMO7        | 3.81495    |
| LMTK2       | 0.6495626  |
| LMTK3       | 1.5419135  |
| LNP         | 0.67546296 |
| LNPEP       | 2.0707517  |
| LOC10004170 | 1.0192232  |
| LOC10086240 | 0.5022292  |
| LOC10105580 | 0.59152794 |
| LOC10105580 | 0.95436764 |
| LOC10105620 | 1.0602958  |
| LOC10105620 | 1.8016336  |

|            |            |
|------------|------------|
| LOC1026332 | 1.2045884  |
| LOC1026336 | 2.5577164  |
| LOC1026337 | 2.9066315  |
| LOC1026338 | 0.93101215 |
| LOC1026344 | 0.93028736 |
| LOC1026367 | 0.24344134 |
| LOC1026377 | 0.85496235 |
| LOC1026380 | 1.9873495  |
| LOC1026391 | 1.2289195  |
| LOC1026395 | 2.3880234  |
| LOC1026416 | 0.4608655  |
| LOC1026416 | 1.053505   |
| LOC1026420 | 0.24947596 |
| LOC1026422 | 0.7948618  |
| LOC1026423 | 1.9577129  |
| LOC1026423 | 1.9837625  |
| LOC1026424 | 0.41558123 |
| LOC1026424 | 1.6474764  |
| LOC1026425 | 1.2262578  |
| LOC1026426 | 0.57212114 |
| LOC1026427 | 0.97961235 |
| LOC1026427 | 0.25350285 |
| LOC1026427 | 0.47943592 |
| LOC1026427 | 0.6526885  |
| LOC1026428 | 0.65651274 |
| LOC1026430 | 0.73525214 |
| LONRF3     | 1.2905045  |
| LOX        | 7.2594247  |
| LOXL1      | 2.5742674  |
| LOXL3      | 0.6886246  |
| LOXL4      | 0.641886   |
| LPAR1      | 4.0328197  |
| LPAR2      | 0.20749211 |
| LPAR3      | 4.1419363  |
| LPCAT1     | 3.2415519  |
| LPCAT2     | 1.0083919  |
| LPHN1      | 0.9505477  |
| LPHN2      | 2.387741   |
| LPHN3      | 2.6715794  |
| LPXN       | 1.0354958  |
| LRCH1      | 1.7269216  |
| LRCH3      | 0.92743874 |
| LRFN1      | 0.27606368 |
| LRFN4      | 3.9244008  |
| LRGUK      | 2.8223665  |

|         |            |
|---------|------------|
| LRIF1   | 0.45239878 |
| LRP12   | 0.4616537  |
| LRP2    | 5.3152037  |
| LRP4    | 1.3124523  |
| LRR1    | 2.4033136  |
| LRR10   | 4.0316706  |
| LRR10B  | 3.3525019  |
| LRR16A  | 2.7979698  |
| LRR17   | 1.8082769  |
| LRR2    | 1.3514566  |
| LRR23   | 5.899355   |
| LRR25   | 1.6704869  |
| LRR26   | 6.949569   |
| LRR27   | 0.28990984 |
| LRR32   | 0.5938778  |
| LRR34   | 3.5583463  |
| LRR36   | 5.7579713  |
| LRR38   | 0.93952394 |
| LRR4    | 1.0887403  |
| LRR43   | 3.5419388  |
| LRR49   | 3.1133153  |
| LRR4B   | 3.9895668  |
| LRR51   | 1.1075091  |
| LRR6    | 0.66508603 |
| LRR71   | 0.6706779  |
| LRR75A  | 1.7324023  |
| LRR75B  | 1.8823617  |
| LRR8A   | 1.4655724  |
| LRR8B   | 4.324447   |
| LRR8C   | 2.402442   |
| LRR8E   | 1.7635641  |
| LRRCC1  | 0.76574564 |
| LRRFIP1 | 1.1472769  |
| LRRFIP2 | 0.31577682 |
| LRRK1   | 1.0677242  |
| LRRK2   | 4.2872334  |
| LRRN1   | 0.80166435 |
| LRRN3   | 0.5105958  |
| LRRN4   | 1.187619   |
| LRRN4CL | 2.1026177  |
| LRTM2   | 3.5538661  |
| LSM12   | 0.51610184 |
| LSM8    | 0.9333472  |
| LSP1    | 2.5503745  |
| LTA     | 0.83822846 |

|         |            |
|---------|------------|
| LTB     | 2.2415051  |
| LTB4R1  | 2.7472553  |
| LTBP1   | 3.027143   |
| LTBP2   | 3.2803607  |
| LTBP3   | 2.7954183  |
| LTBP4   | 2.11477    |
| LTC4S   | 0.6676984  |
| LTF     | 5.171104   |
| LUC7L3  | 0.9687638  |
| LURAP1  | 2.1072273  |
| LUZP1   | 0.7181568  |
| LXN     | 2.2967687  |
| LY6A    | 2.539463   |
| LY6C1   | 2.167529   |
| LY6F    | 1.274909   |
| LY6G5B  | 3.6130118  |
| LY6G6C  | 2.4554596  |
| LY6G6D  | 1.4238167  |
| LY6I    | 0.95671463 |
| LY75    | 1.1820896  |
| LYL1    | 0.64259577 |
| LYN     | 1.4088578  |
| LYNX1   | 0.94067526 |
| LYPD2   | 6.093366   |
| LYPD5   | 1.5395637  |
| LYPD6   | 0.60955286 |
| LYPD6B  | 4.1433005  |
| LYRM2   | 0.4036889  |
| LYSMD2  | 1.9834156  |
| LYSMD3  | 0.3225422  |
| LYST    | 1.3442993  |
| LYVE1   | 3.901462   |
| LYZ1    | 2.1329737  |
| LYZ2    | 2.353022   |
| LZTFL1  | 0.29753876 |
| LZTS1   | 0.9895005  |
| LZTS2   | 0.6763096  |
| LZTS3   | 1.3374062  |
| M1AP    | 2.5373287  |
| MAATS1  | 2.5404565  |
| MAB21L3 | 0.63679695 |
| MACC1   | 2.8332124  |
| MACF1   | 2.033049   |
| MAFA    | 0.62844086 |
| MAFF    | 3.7616496  |

|           |            |
|-----------|------------|
| MAFK      | 1.1117139  |
| MAGEA7-PS | 0.9341521  |
| MAGEE1    | 0.5216856  |
| MAGEF1    | 0.82812357 |
| MAGI1     | 0.41967154 |
| MAGI2     | 0.99939513 |
| MAGI3     | 2.0290456  |
| MAGOHB    | 1.946548   |
| MAK       | 1.0737445  |
| MAK16     | 0.5614743  |
| MAL       | 2.096684   |
| MAL2      | 1.3619714  |
| MALAT1    | 2.5928946  |
| MALL      | 4.1645722  |
| MALT1     | 2.5987668  |
| MAMDC2    | 2.5390744  |
| MAML1     | 0.73662853 |
| MAML2     | 0.8341017  |
| MAML3     | 2.032464   |
| MAMSTR    | 2.6922798  |
| MAN1C1    | 0.3571372  |
| MAP10     | 2.2134805  |
| MAP1A     | 1.1538303  |
| MAP1B     | 3.113004   |
| MAP1S     | 0.3840027  |
| MAP2      | 2.7213407  |
| MAP2K3OS  | 0.38001013 |
| MAP3K1    | 0.57268906 |
| MAP3K14   | 0.91422033 |
| MAP3K15   | 0.8342874  |
| MAP3K19   | 0.81885076 |
| MAP3K3    | 1.0121245  |
| MAP3K6    | 4.716194   |
| MAP3K7    | 0.419446   |
| MAP3K8    | 2.4953523  |
| MAP3K9    | 2.779031   |
| MAP4      | 1.8304853  |
| MAP4K1    | 1.2381611  |
| MAP4K3    | 0.24417543 |
| MAP4K4    | 1.2343116  |
| MAP4K5    | 0.31758404 |
| MAP6      | 3.2177086  |
| MAP6D1    | 0.29948902 |
| MAP7D1    | 0.41919088 |
| MAPK10    | 2.2444887  |



|          |            |
|----------|------------|
| MAPK11   | 1.7025175  |
| MAPK12   | 0.99682283 |
| MAPK13   | 3.3856153  |
| MAPK1IP1 | 0.6694603  |
| MAPK6    | 0.39683628 |
| MAPK7    | 1.02703    |
| MAPK8IP1 | 0.61370754 |
| MAPK8IP3 | 0.61066055 |
| MAPKAPK2 | 1.0024791  |
| MAPKAPK3 | 1.8800907  |
| MAPKBP1  | 2.098767   |
| MAPRE1   | 0.65672016 |
| MAPRE2   | 1.4895239  |
| MAPT     | 4.257713   |
| MARCKS   | 2.2192392  |
| MARCKSL1 | 2.5605035  |
| MARF1    | 0.8599596  |
| MARK1    | 1.1806178  |
| MARK2    | 0.4046836  |
| MARK3    | 0.67331266 |
| MARK4    | 0.1662221  |
| MARVELD3 | 2.03364    |
| MAST2    | 0.572649   |
| MAST4    | 2.4531026  |
| MAT2A    | 0.60808086 |
| MATN2    | 0.24612379 |
| MATN4    | 4.2192864  |
| MAX      | 0.619256   |
| MB       | 6.212615   |
| MB21D1   | 1.6475687  |
| MBD1     | 1.0030723  |
| MBD2     | 1.2128844  |
| MBD4     | 0.3273058  |
| MBD5     | 1.0293176  |
| MBIP     | 1.5671463  |
| MBNL1    | 0.4528165  |
| MBNL2    | 1.1221452  |
| MBNL3    | 2.6589284  |
| MBOAT1   | 3.3578353  |
| MBOAT2   | 1.112323   |
| MBP      | 3.553761   |
| MC5R     | 1.3569338  |
| MCEMP1   | 4.8723845  |
| MCF2L    | 3.4554229  |
| MCL1     | 0.9923358  |

|           |            |
|-----------|------------|
| MCM4      | 0.57891226 |
| MCM6      | 0.33178234 |
| MCMBP     | 0.3601899  |
| MCOLN2    | 1.1309543  |
| MCOLN3    | 1.704102   |
| MCPT4     | 4.011248   |
| MCPT8     | 2.1984394  |
| MCRS1     | 0.38274765 |
| MCTP1     | 3.2960267  |
| MDC1      | 0.5341592  |
| MDFI      | 1.1161866  |
| MDFIC     | 0.6010442  |
| MDGA1     | 0.74203086 |
| MDH1B     | 4.600059   |
| MDM1      | 0.2159872  |
| MDM4      | 2.0487895  |
| MDN1      | 1.0689347  |
| ME2       | 0.5339074  |
| ME3       | 4.561827   |
| MECP2     | 1.0845866  |
| MED10     | 0.1575079  |
| MED11     | 0.20028543 |
| MED12     | 0.5579195  |
| MED13     | 0.57798266 |
| MED13L    | 2.868866   |
| MED21     | 0.47574043 |
| MED30     | 0.4917488  |
| MED31     | 1.1120868  |
| MED9OS    | 0.67578125 |
| MEF2A     | 0.33007002 |
| MEF2C     | 0.9999995  |
| MEFV      | 3.3240447  |
| MEG3      | 0.5976467  |
| MEGF6     | 2.3248234  |
| MEGF8     | 0.5839677  |
| MEIG1     | 5.536485   |
| MEOX1     | 4.429046   |
| MEOX2     | 5.216289   |
| MESDC1    | 1.7799995  |
| MESP1     | 3.2586763  |
| MESP2     | 0.40103316 |
| METAP2    | 0.3211298  |
| METRNL    | 0.4096241  |
| METTLL14  | 0.8232496  |
| METTLL21C | 2.2874389  |

|          |            |
|----------|------------|
| METTL24  | 3.8927982  |
| METTL3   | 0.3557868  |
| METTL6   | 0.38480902 |
| MEX3B    | 1.0933692  |
| MEX3C    | 0.82912636 |
| MEX3D    | 0.5561385  |
| MFAP1A   | 1.1575766  |
| MFAP1B   | 1.4496918  |
| MFAP2    | 2.9402008  |
| MFAP3    | 0.33114195 |
| MFAP3L   | 1.8329525  |
| MFAP4    | 5.418289   |
| MFAP5    | 6.6129875  |
| MFGE8    | 1.3061953  |
| MFNG     | 1.9178228  |
| MFSD10   | 0.4268422  |
| MFSD4    | 2.2122965  |
| MFSD6    | 1.2514825  |
| MFSD6L   | 3.6267014  |
| MFSD7A   | 0.9974606  |
| MFSD7B   | 1.0154023  |
| MGA      | 1.2288322  |
| MGAT3    | 3.8834736  |
| MGAT4A   | 2.36334    |
| MGAT5    | 0.37751245 |
| MGEA5    | 1.9340959  |
| MGL2     | 0.64706373 |
| MGP      | 4.0965242  |
| MIA      | 1.6569343  |
| MIB1     | 0.3264351  |
| MICAL1   | 2.2208242  |
| MICAL2   | 1.1381721  |
| MICALL1  | 0.4095583  |
| MICU3    | 1.6276295  |
| MID2     | 1.4670482  |
| MIDN     | 0.77208185 |
| MIER1    | 1.5050011  |
| MILL2    | 2.2687569  |
| MIOS     | 0.29043245 |
| MIPOL1   | 0.8322365  |
| MIR17HG  | 0.70702696 |
| MIR22HG  | 0.43516684 |
| MIS12    | 0.6359596  |
| MIS18A   | 0.2678113  |
| MIS18BP1 | 1.4172776  |

|        |            |
|--------|------------|
| MISP   | 0.76609516 |
| MITD1  | 0.57669926 |
| MITF   | 0.79691124 |
| MKI67  | 0.62298155 |
| MKL1   | 1.4827318  |
| MLANA  | 4.7466044  |
| MLC1   | 7.9516664  |
| MLF1   | 4.19892    |
| MLIP   | 0.8714392  |
| MLLT10 | 0.9423876  |
| MLLT11 | 0.9480057  |
| MLLT3  | 0.46940327 |
| MLLT4  | 4.0910788  |
| MLLT6  | 0.936646   |
| MLPH   | 2.267969   |
| MLXIP  | 1.6390061  |
| MME    | 1.441711   |
| MMGT2  | 0.67077255 |
| MMP11  | 1.0625114  |
| MMP12  | 0.5128579  |
| MMP13  | 3.862911   |
| MMP2   | 2.6573677  |
| MMP23  | 0.6312432  |
| MMP25  | 6.2627716  |
| MMP3   | 5.170152   |
| MMP8   | 6.775631   |
| MMP9   | 5.527232   |
| MMRN1  | 2.6175027  |
| MMRN2  | 0.21124887 |
| MNDA   | 2.293973   |
| MNDAL  | 0.6969485  |
| MNS1   | 4.725691   |
| MNT    | 0.4954772  |
| MOB1A  | 0.4760542  |
| MOB1B  | 1.4131253  |
| MOB3A  | 2.1897817  |
| MOB3C  | 1.1476908  |
| MOB4   | 0.83654356 |
| MOK    | 2.8883715  |
| MON1B  | 1.1362209  |
| MON2   | 0.5593467  |
| MORC1  | 1.1619575  |
| MORC3  | 0.77084494 |
| MORN3  | 1.1796458  |
| MORN4  | 1.5184875  |

|           |            |
|-----------|------------|
| MORN5     | 4.872312   |
| MOXD1     | 0.85724926 |
| MPHOSPH10 | 0.5373931  |
| MPHOSPH6  | 0.8840542  |
| MPL       | 1.104034   |
| MPP2      | 0.44794536 |
| MPP3      | 0.38558364 |
| MPP5      | 2.2873273  |
| MPP7      | 2.0174394  |
| MPPED2    | 0.98527074 |
| MPRIP     | 0.7594032  |
| MPZL1     | 1.2060118  |
| MRC2      | 1.710154   |
| MRGPRA2A  | 6.8340583  |
| MRGPRA2B  | 6.7873273  |
| MRGPRA3   | 1.7187591  |
| MRGPRA5   | 2.1333573  |
| MRGPRA6   | 6.0505686  |
| MRGPRG    | 1.7311296  |
| MROH1     | 0.6749208  |
| MRPL20    | 0.7495947  |
| MRPL3     | 0.3301649  |
| MRPS6     | 1.0548043  |
| MRVI1     | 0.33057094 |
| MS4A1     | 2.22155    |
| MS4A14    | 0.60033417 |
| MS4A15    | 1.3114023  |
| MS4A3     | 0.69318914 |
| MS4A4A    | 5.279042   |
| MS4A4B    | 2.6748447  |
| MS4A4D    | 3.5706758  |
| MS4A6B    | 3.8277013  |
| MS4A6C    | 2.6697826  |
| MS4A6D    | 2.9157062  |
| MS4A7     | 1.1348748  |
| MS4A8A    | 0.81924057 |
| MSANTD1   | 1.4509664  |
| MSANTD2   | 0.54508924 |
| MSANTD3   | 1.5671015  |
| MSI2      | 0.8875756  |
| MSL2      | 1.4025679  |
| MSL3L2    | 0.48988342 |
| MSLN      | 2.9539828  |
| MSN       | 2.2723393  |
| MSRB3     | 1.049725   |

|         |            |
|---------|------------|
| MSS51   | 0.9091015  |
| MST1R   | 1.9292536  |
| MSX1    | 2.1865675  |
| MTA2    | 1.075274   |
| MTAP7D3 | 1.6684155  |
| MTBP    | 0.74357843 |
| MTCL1   | 6.072977   |
| MTDH    | 0.79285765 |
| MTF1    | 0.34565783 |
| MTF2    | 0.5814109  |
| MTHFD1L | 0.39752483 |
| MTHFD2  | 2.6832519  |
| MTIF2   | 1.5704899  |
| MTMR12  | 1.2962341  |
| MTMR14  | 0.19896555 |
| MTMR3   | 1.023232   |
| MTMR6   | 0.42999363 |
| MTRR    | 0.32134795 |
| MTSS1L  | 1.1876822  |
| MTURN   | 2.0785894  |
| MTUS2   | 0.9688325  |
| MUC1    | 5.9063244  |
| MUC13   | 1.7728405  |
| MUC20   | 4.773932   |
| MUC4    | 5.4192185  |
| MUC5B   | 6.6204786  |
| MUM1L1  | 3.6645303  |
| MURC    | 0.5039387  |
| MUSTN1  | 0.9640398  |
| MVB12B  | 1.8976569  |
| MVP     | 0.3667059  |
| MX1     | 1.0187135  |
| MX2     | 0.3543954  |
| MXD1    | 4.2613864  |
| MXD4    | 0.7998233  |
| MXRA7   | 2.3298087  |
| MXRA8   | 1.25494    |
| MYADM   | 2.0795531  |
| MYADML2 | 0.6420975  |
| MYB     | 2.716485   |
| MYBL2   | 0.37793112 |
| MYBPC2  | 2.0559368  |
| MYBPC3  | 3.9982586  |
| MYBPH   | 0.9487817  |
| MYBPHL  | 4.535016   |

|         |            |
|---------|------------|
| MYC     | 1.8706264  |
| MYCBP2  | 0.37085485 |
| MYCBPAP | 3.3432198  |
| MYD88   | 1.5814781  |
| MYEF2   | 1.8596954  |
| MYH10   | 1.4429655  |
| MYH11   | 3.4439893  |
| MYH14   | 3.0934062  |
| MYH3    | 0.8091724  |
| MYH6    | 6.603222   |
| MYH7    | 6.626493   |
| MYH7B   | 1.8774543  |
| MYH8    | 2.4255126  |
| MYH9    | 1.371088   |
| MYL1    | 0.7652254  |
| MYL12A  | 1.2234845  |
| MYL12B  | 0.41429043 |
| MYL3    | 5.061219   |
| MYL4    | 4.945979   |
| MYL7    | 5.9221773  |
| MYL9    | 2.735569   |
| MYLK    | 1.0662827  |
| MYLK2   | 1.1788244  |
| MYLK3   | 0.7708194  |
| MYO10   | 1.4957747  |
| MYO18B  | 0.25478268 |
| MYO1C   | 1.6892319  |
| MYO1D   | 3.3153     |
| MYO1F   | 1.357863   |
| MYO1G   | 1.6615582  |
| MYO1H   | 2.1075833  |
| MYO5A   | 2.1968656  |
| MYO5C   | 4.8006907  |
| MYO9A   | 0.7268801  |
| MYO9B   | 0.28106976 |
| MYOC    | 0.38020682 |
| MYOCD   | 2.4745328  |
| MYOF    | 0.45005202 |
| MYOM1   | 4.1140256  |
| MYOM2   | 4.6841183  |
| MYOM3   | 1.9221368  |
| MYOZ2   | 5.6300063  |
| MYRF    | 1.3911622  |
| MYRIP   | 5.066405   |
| MYSM1   | 0.47054386 |

|         |            |
|---------|------------|
| MYZAP   | 3.2955089  |
| N28178  | 1.8288777  |
| N4BP1   | 2.2603755  |
| N4BP2L2 | 1.4463882  |
| N4BP3   | 2.0540838  |
| NAA16   | 0.60913944 |
| NAAA    | 1.9489369  |
| NAALAD2 | 1.3238997  |
| NAB1    | 0.32179022 |
| NABP1   | 0.6086278  |
| NACAD   | 0.71965504 |
| NAF1    | 0.72881365 |
| NAIP6   | 0.49379778 |
| NAMPT   | 0.4328165  |
| NANOS1  | 0.58263373 |
| NAP1L1  | 0.68363523 |
| NAP1L4  | 0.33208418 |
| NAPB    | 0.4063053  |
| NAPEPLD | 1.3823404  |
| NAPSA   | 4.4303517  |
| NAT14   | 1.3175461  |
| NAT8L   | 1.2796443  |
| NAV1    | 1.375474   |
| NBEA    | 2.924899   |
| NBEAL1  | 1.1463008  |
| NBEAL2  | 0.19729853 |
| NBL1    | 4.4386435  |
| NBN     | 1.4091806  |
| NCAM1   | 0.5213573  |
| NCAPH   | 0.14866924 |
| NCBP2   | 0.6694808  |
| NCCRP1  | 1.9504313  |
| NCF1    | 1.8797379  |
| NCF2    | 1.8744836  |
| NCF4    | 2.4267182  |
| NCK1    | 0.52710867 |
| NCK2    | 0.86701965 |
| NCKAP1L | 0.8567767  |
| NCKAP5  | 5.91718    |
| NCOA6   | 0.7403512  |
| NCOA7   | 2.7408335  |
| NCOR2   | 0.36575365 |
| NCR1    | 0.76925564 |
| NCS1    | 1.2634296  |
| NCSTN   | 0.22100306 |



|          |            |
|----------|------------|
| ND6      | 1.8475738  |
| NDC80    | 0.5674689  |
| NDE1     | 0.6055155  |
| NDEL1    | 0.47868347 |
| NDN      | 0.92995787 |
| NDNF     | 3.5046206  |
| NDRG1    | 0.73220444 |
| NDRG4    | 3.444247   |
| NDUFA4L2 | 2.0285134  |
| NEAT1    | 1.7034721  |
| NEBL     | 3.463136   |
| NECAP2   | 0.47714758 |
| NEDD9    | 2.5792341  |
| NEFH     | 0.35992932 |
| NEK11    | 2.9022324  |
| NEK5     | 4.3731847  |
| NEK7     | 0.6067238  |
| NEMF     | 0.6576333  |
| NEO1     | 1.4486961  |
| NES      | 3.788031   |
| NEURL1A  | 2.9019675  |
| NEURL3   | 2.2737594  |
| NEURL4   | 0.33067703 |
| NEUROG1  | 1.1240847  |
| NEXN     | 2.3224788  |
| NFAM1    | 0.46659946 |
| NFAT5    | 2.5704718  |
| NFATC1   | 1.5677791  |
| NFATC2   | 0.8250365  |
| NFATC2IP | 0.50045156 |
| NFATC3   | 0.40435958 |
| NFATC4   | 2.0946054  |
| NFE2     | 2.0824814  |
| NFE2L1   | 0.35284805 |
| NFE2L2   | 1.042223   |
| NFE2L3   | 0.7022495  |
| NFKB1    | 1.745542   |
| NFKB2    | 1.7788348  |
| NFKBIA   | 3.0278368  |
| NFKBID   | 2.8423886  |
| NFKBIE   | 2.292398   |
| NFKBIZ   | 2.5130258  |
| NFYA     | 0.97250223 |
| NGFRAP1  | 1.5341415  |
| NGP      | 4.4172816  |

|        |            |
|--------|------------|
| NHLRC2 | 0.87213564 |
| NHLRC4 | 2.74702    |
| NHSL2  | 2.451182   |
| NID1   | 0.65919685 |
| NIN    | 1.8216214  |
| NINJ2  | 0.5041647  |
| NINL   | 1.4916933  |
| NIPA1  | 1.3923793  |
| NIPAL2 | 3.9086475  |
| NIPAL3 | 1.4232512  |
| NIPBL  | 1.089118   |
| NKAIN4 | 2.3331418  |
| NKAP   | 0.24252272 |
| NKD1   | 2.953897   |
| NKG7   | 1.4145546  |
| NKTR   | 1.2679839  |
| NKX2-1 | 7.1993346  |
| NKX2-5 | 1.3668497  |
| NLGN2  | 1.7063727  |
| NLGN3  | 0.7203717  |
| NLK    | 0.37855434 |
| NLRC3  | 0.7614889  |
| NLRC4  | 2.236875   |
| NLRC5  | 1.281138   |
| NLRP1A | 0.43206072 |
| NLRP3  | 4.5880475  |
| NLRP5  | 0.6938734  |
| NMB    | 1.4088168  |
| NME5   | 4.4060802  |
| NME9   | 0.8943298  |
| NMRK2  | 0.19220066 |
| NMT2   | 0.6350701  |
| NMUR2  | 4.180635   |
| NNAT   | 3.7572732  |
| NOC3L  | 0.8470211  |
| NOD1   | 2.0135584  |
| NOD2   | 4.366301   |
| NOG    | 1.4598637  |
| NOL10  | 0.71688914 |
| NOL3   | 0.8594327  |
| NOL8   | 0.43010807 |
| NOP14  | 0.7518091  |
| NOP56  | 0.39398003 |
| NOP58  | 0.4222803  |
| NOP9   | 0.9024265  |

|         |            |
|---------|------------|
| NOS2    | 3.8704305  |
| NOSTRIN | 0.5956392  |
| NOTCH1  | 1.5786929  |
| NOTCH2  | 0.93442154 |
| NOTCH3  | 2.7347002  |
| NOTCH4  | 2.2235045  |
| NOV     | 3.1622088  |
| NOVA2   | 0.8180399  |
| NOX1    | 0.7613549  |
| NOX4    | 5.518519   |
| NOXO1   | 0.28065538 |
| NOXRED1 | 1.3210318  |
| NPAS4   | 1.4608498  |
| NPC2    | 1.3446288  |
| NPDC1   | 1.6960683  |
| NPEPPS  | 1.2419643  |
| NPHP1   | 1.7875302  |
| NPHP4   | 2.1166608  |
| NPHS2   | 2.776853   |
| NPM1    | 0.3010702  |
| NPM2    | 1.4957957  |
| NPNT    | 5.289719   |
| NPPA    | 4.8660655  |
| NPPB    | 0.28775215 |
| NPPC    | 1.643311   |
| NPR2    | 0.8899765  |
| NPR3    | 1.94383    |
| NPW     | 7.6772146  |
| NPY1R   | 2.6269662  |
| NR2C2   | 1.4245944  |
| NR2F1   | 0.5382633  |
| NR3C1   | 0.22054148 |
| NR4A1   | 3.3831625  |
| NR4A2   | 2.5885057  |
| NRADD   | 0.726841   |
| NRARP   | 2.7685735  |
| NRAS    | 1.3413324  |
| NRCAM   | 6.2047634  |
| NRD1    | 1.6473479  |
| NREP    | 0.41046572 |
| NRF1    | 0.4682455  |
| NRG1    | 0.28251314 |
| NRG2    | 0.27367568 |
| NRGN    | 1.3554978  |
| NRIP1   | 1.4608974  |

|         |            |
|---------|------------|
| NRIP3   | 1.8340261  |
| NRN1L   | 1.0872507  |
| NRP1    | 0.20027208 |
| NRP2    | 1.1049829  |
| NRROS   | 0.83049107 |
| NRSN1   | 0.49213123 |
| NSD1    | 0.44792414 |
| NSF     | 1.6081333  |
| NSG1    | 3.4750638  |
| NSG2    | 1.6380424  |
| NT5C3B  | 0.37042093 |
| NTF5    | 0.87815    |
| NTN1    | 1.5975051  |
| NTN4    | 1.0407491  |
| NTNG2   | 3.9659529  |
| NTRK2   | 0.9203265  |
| NTRK3   | 1.0411913  |
| NTSR2   | 2.3376143  |
| NUAK1   | 0.7345817  |
| NUAK2   | 1.3525648  |
| NUB1    | 0.705564   |
| NUCB2   | 1.9441814  |
| NUDT10  | 1.9590752  |
| NUDT11  | 2.247596   |
| NUFIP2  | 0.4143381  |
| NUMA1   | 0.8158417  |
| NUMBL   | 1.9386125  |
| NUP107  | 0.3959775  |
| NUP153  | 1.1630969  |
| NUP160  | 0.6064725  |
| NUP188  | 0.5763273  |
| NUP205  | 0.17753887 |
| NUP210L | 0.75951743 |
| NUP35   | 0.18098688 |
| NUP62   | 0.27733183 |
| NUP98   | 2.1039376  |
| NUPR1   | 4.371491   |
| NUPR1L  | 0.8407085  |
| NVL     | 0.6673789  |
| NWD2    | 2.735931   |
| NXF1    | 0.65061855 |
| NXF2    | 1.8888109  |
| NXNL2   | 1.9584682  |
| NXPE3   | 2.2154837  |
| NXPE4   | 0.46760488 |

|             |            |
|-------------|------------|
| NXPE5       | 0.75815606 |
| NXPH3       | 3.9516988  |
| NYX         | 2.7276657  |
| OAS1A       | 0.47075605 |
| OAS1F       | 0.838984   |
| OAS2        | 1.7315388  |
| OAS3        | 1.5998931  |
| OASL1       | 0.39308643 |
| OASL2       | 2.3535419  |
| OAZ2        | 1.4297857  |
| OBFC1       | 1.2155724  |
| OBSL1       | 3.716555   |
| OCRL        | 0.33086967 |
| ODC1        | 0.30350924 |
| ODF2        | 0.2975316  |
| ODF2L       | 0.64601135 |
| OFD1        | 0.3799076  |
| OGFRL1      | 0.6036954  |
| OGN         | 6.7019854  |
| OGT         | 0.39947462 |
| OLFM1       | 1.9592853  |
| OLFM4       | 4.464148   |
| OLFML2B     | 2.0384512  |
| OLFML3      | 1.6700912  |
| OLFR1043    | 0.32521844 |
| OLFR1131    | 0.5011687  |
| OLFR1134    | 1.010102   |
| OLFR1180    | 0.9797354  |
| OLFR1372-PS | 1.992856   |
| OLFR1383    | 0.32044172 |
| OLFR1384    | 1.9949269  |
| OLFR1396    | 1.5284421  |
| OLFR1443    | 0.32926202 |
| OLFR1505    | 0.9547272  |
| OLFR213     | 0.7855549  |
| OLFR224     | 1.0992804  |
| OLFR259     | 0.77982736 |
| OLFR414     | 0.77784896 |
| OLFR482     | 1.9098959  |
| OLFR524     | 1.1190786  |
| OLFR544     | 1.4722881  |
| OLFR56      | 1.6258638  |
| OLFR576     | 1.6298895  |
| OLFR635     | 1.0967946  |
| OLFR96      | 1.4517386  |

|         |            |
|---------|------------|
| OLR1    | 4.008704   |
| OMD     | 3.712666   |
| OPHN1   | 0.8095417  |
| OPN3    | 1.1382506  |
| OPRM1   | 0.20243359 |
| OPTC    | 1.7568636  |
| ORAI2   | 2.2417154  |
| ORC2    | 0.24292254 |
| ORC4    | 2.3324523  |
| OSBPL10 | 2.3703241  |
| OSBPL3  | 1.9138184  |
| OSBPL5  | 2.319488   |
| OSBPL6  | 3.6581297  |
| OSBPL7  | 0.412333   |
| OSBPL9  | 2.5010624  |
| OSCP1   | 3.1113818  |
| OSGIN2  | 1.7476091  |
| OSM     | 3.7199185  |
| OSMR    | 3.7808084  |
| OSR1    | 4.820969   |
| OSTF1   | 0.57233    |
| OTOP1   | 1.0814853  |
| OTUD1   | 1.5152619  |
| OTUD4   | 0.24643946 |
| OTUD5   | 0.7176328  |
| OTUD7B  | 1.2716079  |
| OVGP1   | 2.408969   |
| OVOL1   | 1.0008016  |
| OXCT1   | 1.150547   |
| OXR1    | 0.39330292 |
| P2RX1   | 1.3059397  |
| P2RX5   | 4.023002   |
| P2RY10  | 2.6263905  |
| P2RY13  | 0.17251873 |
| P2RY14  | 0.31927872 |
| P2RY2   | 1.2356791  |
| P4HA1   | 2.229239   |
| P4HA2   | 2.9367838  |
| P4HTM   | 1.5086179  |
| PABPC1  | 0.34599304 |
| PABPC1L | 3.6499577  |
| PACRG   | 3.3890166  |
| PACS1   | 1.3818741  |
| PACS2   | 0.6914878  |
| PACSIN2 | 0.47724438 |

|          |            |
|----------|------------|
| PADI2    | 1.5424223  |
| PADI3    | 0.61487675 |
| PADI4    | 2.2162018  |
| PAFAH1B1 | 0.2695551  |
| PAFAH1B2 | 0.717278   |
| PAG1     | 3.4056895  |
| PAK2     | 0.6441016  |
| PAK3     | 0.51898193 |
| PAK6     | 0.8823774  |
| PALD1    | 0.9185648  |
| PALM2    | 0.49673247 |
| PAM      | 2.28621    |
| PAMR1    | 0.4636116  |
| PAN3     | 0.92498064 |
| PANCT2   | 1.430857   |
| PANK2    | 0.31250525 |
| PANK3    | 1.0829425  |
| PANX1    | 0.3776121  |
| PAPOLG   | 1.0501223  |
| PAPPA    | 3.236894   |
| PAPPA2   | 2.2459362  |
| PAQR5    | 1.9985301  |
| PAQR6    | 2.3674858  |
| PAQR8    | 2.9280446  |
| PARD3B   | 1.3782523  |
| PARD6B   | 3.5212183  |
| PARD6G   | 3.1331563  |
| PARG     | 0.39103127 |
| PARM1    | 4.263045   |
| PARP10   | 0.27660227 |
| PARP11   | 0.95346165 |
| PARP14   | 1.4048905  |
| PARP2    | 0.42351484 |
| PARP3    | 1.3073454  |
| PARP4    | 1.3903108  |
| PARP8    | 2.5413728  |
| PARVB    | 1.9719481  |
| PATZ1    | 1.198446   |
| PAWR     | 1.5297818  |
| PAXBP1   | 0.29430056 |
| PAXIP1   | 0.95738673 |
| PBRM1    | 0.6323719  |
| PBX1     | 1.3151822  |
| PBX3     | 1.5886168  |
| PBXIP1   | 1.3926497  |

|          |            |
|----------|------------|
| PCBP3    | 2.00597    |
| PCDH17   | 3.1565552  |
| PCDH18   | 2.7294722  |
| PCDH19   | 3.7453022  |
| PCDH20   | 0.6375294  |
| PCDH7    | 0.7820611  |
| PCDHAC2  | 2.0628588  |
| PCDHB10  | 3.2131028  |
| PCDHB14  | 2.7105277  |
| PCDHB15  | 1.0717106  |
| PCDHB16  | 3.406302   |
| PCDHB17  | 2.3853178  |
| PCDHB18  | 3.0100896  |
| PCDHB20  | 3.977744   |
| PCDHB21  | 3.4481802  |
| PCDHB22  | 1.9643683  |
| PCDHB3   | 2.284895   |
| PCDHB4   | 1.7901449  |
| PCDHB6   | 2.712141   |
| PCDHB7   | 3.1411982  |
| PCDHB8   | 0.9613383  |
| PCDHB9   | 1.5503395  |
| PCDHGA1  | 2.3278372  |
| PCDHGA10 | 2.9005363  |
| PCDHGA5  | 1.2933815  |
| PCDHGA9  | 2.1564279  |
| PCDHGB1  | 0.7848036  |
| PCF11    | 1.8330758  |
| PCGF3    | 0.95532155 |
| PCGF5    | 1.4183192  |
| PCIF1    | 0.84942293 |
| PCK2     | 0.4853809  |
| PCM1     | 0.9379349  |
| PCNT     | 1.8330612  |
| PCNXL2   | 1.4794924  |
| PCNXL4   | 0.89044666 |
| PCOLCE   | 1.5209002  |
| PCOLCE2  | 3.73319    |
| PCP4     | 0.82057023 |
| PCSK2    | 1.1867318  |
| PCSK5    | 0.73071575 |
| PCYOX1L  | 1.0785043  |
| PCYT1A   | 0.51557827 |
| PDCD1    | 1.7823114  |
| PDCD10   | 0.3882451  |



|          |            |
|----------|------------|
| PDCD1LG2 | 0.5945561  |
| PDCL3    | 1.926733   |
| PDE1B    | 1.1228118  |
| PDE3A    | 1.7918513  |
| PDE4A    | 0.37732172 |
| PDE4B    | 3.4399767  |
| PDE4D    | 1.7204263  |
| PDE5A    | 1.7013493  |
| PDE6D    | 0.63223076 |
| PDE7A    | 2.1178975  |
| PDE7B    | 1.5045433  |
| PDE8B    | 2.6594229  |
| PDGFA    | 1.8793483  |
| PDGFB    | 3.2462788  |
| PDGFD    | 1.2010536  |
| PDGFRA   | 4.1920557  |
| PDGFRB   | 0.74780893 |
| PDGFRL   | 2.9229498  |
| PDIA2    | 2.310046   |
| PDK3     | 1.8559213  |
| PDK4     | 1.1107583  |
| PDLIM2   | 3.3959522  |
| PDLIM3   | 2.3993907  |
| PDLIM5   | 0.60286474 |
| PDLIM7   | 1.7038956  |
| PDP1     | 1.3537116  |
| PDPN     | 6.189088   |
| PDS5A    | 0.5322161  |
| PDS5B    | 0.34888077 |
| PDZD2    | 3.0835142  |
| PDZD3    | 1.1017413  |
| PDZD4    | 3.058579   |
| PDZD8    | 0.7791605  |
| PEA15A   | 0.60530996 |
| PEAK1    | 0.5702081  |
| PEAR1    | 0.54067516 |
| PECAM1   | 2.449098   |
| PEG13    | 2.0271173  |
| PEG3     | 1.6350636  |
| PEG3OS   | 1.0815387  |
| PELI1    | 0.8444543  |
| PENK     | 3.2349062  |
| PER1     | 1.1810756  |
| PES1     | 0.9225154  |
| PF4      | 2.363049   |

|         |            |
|---------|------------|
| PFAS    | 0.62670445 |
| PFKFB2  | 0.9305091  |
| PFKFB3  | 4.647937   |
| PFKFB4  | 2.667141   |
| PFKP    | 1.6354642  |
| PGAM2   | 3.2494907  |
| PGAP1   | 1.1047966  |
| PGBD5   | 1.374687   |
| PGGT1B  | 1.0980749  |
| PGLYRP1 | 7.428018   |
| PGM1    | 0.8540292  |
| PGM2L1  | 0.73498464 |
| PGM5    | 1.5455256  |
| PGS1    | 1.8786521  |
| PHACTR1 | 4.085723   |
| PHACTR2 | 2.1112223  |
| PHC1    | 1.1160924  |
| PHC2    | 0.9637618  |
| PHC3    | 0.83367825 |
| PHEX    | 2.6433165  |
| PHF11A  | 0.8210974  |
| PHF11B  | 1.3517666  |
| PHF11D  | 1.4525595  |
| PHF13   | 0.43110275 |
| PHF2    | 0.6294098  |
| PHF20   | 0.5432472  |
| PHF20L1 | 1.2277989  |
| PHF21A  | 0.3208065  |
| PHF21B  | 1.0931275  |
| PHF3    | 0.25987625 |
| PHF6    | 0.7015662  |
| PHF8    | 1.2437506  |
| PHGDH   | 1.24646    |
| PHGR1   | 0.7977381  |
| PHIP    | 0.8864324  |
| PHKA1   | 0.6703639  |
| PHKG1   | 0.63903356 |
| PHLDA3  | 0.27583075 |
| PHLDB1  | 2.642806   |
| PHLDB2  | 1.0475469  |
| PHLPP2  | 0.6950011  |
| PHRF1   | 0.36246824 |
| PHTF1   | 0.811193   |
| PHTF1OS | 0.20549822 |
| PHXR4   | 2.983305   |

|         |            |
|---------|------------|
| PI15    | 2.4611444  |
| PI16    | 8.346766   |
| PI4K2B  | 0.91391706 |
| PIAS1   | 0.508173   |
| PIBF1   | 0.537555   |
| PICALM  | 1.3611379  |
| PIEZO1  | 1.8444242  |
| PIEZO2  | 2.505785   |
| PIFO    | 2.1277976  |
| PIGA    | 0.45124102 |
| PIGM    | 0.9370265  |
| PIH1D2  | 1.3353748  |
| PIK3AP1 | 1.2819929  |
| PIK3C2A | 1.3013973  |
| PIK3CA  | 0.95622396 |
| PIK3CD  | 0.7616577  |
| PIK3CG  | 2.5315943  |
| PIK3IP1 | 2.2592278  |
| PIK3R3  | 1.6068354  |
| PIK3R5  | 2.3862696  |
| PIK3R6  | 2.3282652  |
| PILRA   | 2.3315024  |
| PILRB1  | 0.44961357 |
| PILRB2  | 1.441792   |
| PIM1    | 3.0797358  |
| PIM2    | 0.7882576  |
| PIM3    | 1.5977292  |
| PINX1   | 0.89289284 |
| PIP4K2A | 1.6612244  |
| PIP5K1A | 0.46088886 |
| PIP5K1C | 0.61660147 |
| PIRA11  | 1.0162716  |
| PIRA2   | 0.76665163 |
| PIRA6   | 0.9759383  |
| PIRA7   | 0.97729063 |
| PITPNA  | 0.3095131  |
| PITPNM1 | 0.41482925 |
| PITPNM3 | 3.9609694  |
| PIWIL4  | 2.6267421  |
| PJA2    | 0.9326596  |
| PKD1    | 0.72782755 |
| PKD1L3  | 1.2882128  |
| PKD2    | 2.1330347  |
| PKIA    | 1.8535254  |
| PKIB    | 0.314106   |

|         |            |
|---------|------------|
| PKM     | 1.5046358  |
| PKN2    | 0.58896446 |
| PKN3    | 0.526752   |
| PKNOX1  | 0.32251787 |
| PKNOX2  | 4.673096   |
| PLA2G1B | 4.036123   |
| PLA2G2C | 0.8875425  |
| PLA2G4A | 0.91808605 |
| PLA2G4F | 1.3484056  |
| PLA2G7  | 1.1479201  |
| PLA2R1  | 0.898088   |
| PLAC8   | 1.6647692  |
| PLAC9A  | 1.5055013  |
| PLAGL1  | 2.1853428  |
| PLAGL2  | 1.4529762  |
| PLAT    | 5.358895   |
| PLAU    | 2.0492165  |
| PLAUR   | 4.8548865  |
| PLB1    | 2.2200596  |
| PLCB2   | 1.0603545  |
| PLCB3   | 0.7555971  |
| PLCB4   | 3.8407078  |
| PLCD1   | 1.7157674  |
| PLCD3   | 1.2063174  |
| PLCG2   | 1.2643476  |
| PLCH1   | 2.5079176  |
| PLCH2   | 2.5023277  |
| PLCL1   | 2.3710876  |
| PLCXD3  | 1.0772865  |
| PLD2    | 0.54021454 |
| PLD5    | 1.0250869  |
| PLEC    | 0.5728383  |
| PLEK    | 3.3314872  |
| PLEKHA1 | 2.2115684  |
| PLEKHA2 | 1.3853307  |
| PLEKHA3 | 0.4781313  |
| PLEKHA4 | 1.5654621  |
| PLEKHB1 | 1.1211567  |
| PLEKHB2 | 1.2097001  |
| PLEKHD1 | 3.629283   |
| PLEKHF2 | 1.3501878  |
| PLEKHG2 | 1.552958   |
| PLEKHG4 | 2.0385528  |
| PLEKHH1 | 2.7345796  |
| PLEKHM2 | 0.6993151  |

|          |            |
|----------|------------|
| PLEKHM3  | 0.9122524  |
| PLEKHO1  | 0.7687993  |
| PLEKHO2  | 1.1914482  |
| PLET1    | 3.947237   |
| PLIN1    | 3.2821515  |
| PLIN4    | 2.1159244  |
| PLK2     | 0.94822836 |
| PLN      | 3.4264667  |
| PLOD2    | 5.118845   |
| PLP1     | 1.0820637  |
| PLP2     | 4.209463   |
| PLSCR1   | 1.2145939  |
| PLSCR3   | 1.0031896  |
| PLSCR4   | 0.8701365  |
| PLVAP    | 0.8269911  |
| PLXDC1   | 1.3611939  |
| PLXDC2   | 3.703652   |
| PLXNA1   | 0.5501957  |
| PLXNA2   | 1.0773983  |
| PLXNA4   | 1.5017557  |
| PLXND1   | 0.6808324  |
| PMAIP1   | 3.646494   |
| PMEPA1   | 2.2956586  |
| PML      | 0.40617752 |
| PMP22    | 3.574061   |
| PMS2     | 0.36508656 |
| PNCK     | 2.0790796  |
| PNISR    | 0.5204296  |
| PNLIPRP1 | 1.7160797  |
| PNMA2    | 1.5015645  |
| PNMAL2   | 0.94994617 |
| PNN      | 0.7329545  |
| POC1A    | 1.1958561  |
| POC1B    | 1.1681824  |
| POC5     | 1.2923899  |
| PODN     | 1.6419263  |
| PODNL1   | 0.62186    |
| PODXL    | 2.5576591  |
| PODXL2   | 1.9690464  |
| POF1B    | 2.5257053  |
| POFUT2   | 0.24103928 |
| POGK     | 2.5326936  |
| POLB     | 0.2581606  |
| POLD3    | 0.5366044  |
| POLE2    | 0.2528484  |

|          |            |
|----------|------------|
| POLH     | 2.0102959  |
| POLK     | 0.41918015 |
| POLR3E   | 1.321197   |
| POLR3GL  | 0.48721552 |
| PON2     | 0.52340126 |
| POP4     | 0.3056326  |
| POPDC2   | 2.560902   |
| POPDC3   | 3.664267   |
| PORCN    | 1.9158669  |
| POSTN    | 2.8736067  |
| POT1B    | 2.2452989  |
| POU2AF1  | 0.94231176 |
| POU2F1   | 0.31279325 |
| POU2F2   | 0.8501334  |
| POU3F1   | 0.3128407  |
| POU5F2   | 0.61007357 |
| PPAP2A   | 0.43539572 |
| PPARD    | 0.689064   |
| PPBP     | 2.395474   |
| PPEF2    | 1.8867581  |
| PPFIA1   | 0.4633212  |
| PPFIBP1  | 0.41249895 |
| PPHLN1   | 0.39822865 |
| PPIC     | 2.888556   |
| PPID     | 0.5017452  |
| PPIG     | 0.7792001  |
| PPIL4    | 0.3916192  |
| PPIL6    | 2.0513082  |
| PPIP5K1  | 1.4409628  |
| PPL      | 0.9815264  |
| PPM1D    | 0.61129665 |
| PPM1E    | 1.5253127  |
| PPM1F    | 0.6909046  |
| PPM1H    | 0.64474773 |
| PPM1J    | 1.9432898  |
| PPM1M    | 1.1336226  |
| PPM1N    | 0.91025925 |
| PPP1R10  | 0.29050732 |
| PPP1R12A | 2.298273   |
| PPP1R12B | 0.9123707  |
| PPP1R12C | 0.40112638 |
| PPP1R13B | 0.64241505 |
| PPP1R14A | 1.768827   |
| PPP1R14D | 5.2655263  |
| PPP1R15A | 1.9195905  |

|          |            |
|----------|------------|
| PPP1R16B | 1.1879122  |
| PPP1R18  | 1.9648027  |
| PPP1R1A  | 0.822448   |
| PPP1R2   | 1.6228967  |
| PPP1R21  | 0.55310917 |
| PPP1R26  | 3.8091652  |
| PPP1R32  | 4.3182807  |
| PPP1R36  | 0.84486985 |
| PPP1R3A  | 1.7796235  |
| PPP1R3D  | 3.1634622  |
| PPP1R3F  | 1.4735596  |
| PPP1R9A  | 2.1968741  |
| PPP1R9B  | 1.7193718  |
| PPP2CB   | 0.7925134  |
| PPP2R2A  | 0.87358665 |
| PPP2R2B  | 0.96282077 |
| PPP2R2C  | 1.4879966  |
| PPP2R5B  | 0.71786594 |
| PPP3CA   | 0.71466446 |
| PPP3CB   | 0.18939066 |
| PPP3CC   | 0.9277544  |
| PPP3R1   | 0.47904205 |
| PPP4R1   | 0.59927464 |
| PPP4R2   | 1.1681995  |
| PPP6R3   | 0.5870409  |
| PPRC1    | 0.3436501  |
| PPT1     | 1.1672635  |
| PPY      | 0.8150306  |
| PQLC3    | 2.5119715  |
| PRAF2    | 0.5888076  |
| PRAM1    | 3.0134163  |
| PRAMEF8  | 0.50713015 |
| PRDM1    | 2.3694668  |
| PRDM11   | 0.8763027  |
| PRDM16   | 4.082652   |
| PRDM2    | 1.2268438  |
| PRDM4    | 0.8881955  |
| PRDM5    | 3.6284547  |
| PRDM6    | 3.7470105  |
| PRDM8    | 2.6317441  |
| PRELP    | 0.49030256 |
| PREX1    | 0.48262978 |
| PREX2    | 2.136293   |
| PRF1     | 1.5534749  |
| PRICKLE2 | 0.23962736 |

|          |            |
|----------|------------|
| PRICKLE3 | 0.2508149  |
| PRIM2    | 0.1768713  |
| PRKAA1   | 0.7285137  |
| PRKAB2   | 1.0894008  |
| PRKAR1B  | 2.7083054  |
| PRKAR2B  | 3.3863811  |
| PRKCA    | 1.277164   |
| PRKCB    | 0.91753864 |
| PRKCD    | 1.9929748  |
| PRKCDBP  | 3.871028   |
| PRKCE    | 1.7003837  |
| PRKCH    | 2.6892333  |
| PRKCI    | 0.62621975 |
| PRKCQ    | 1.2901917  |
| PRKD1    | 4.313859   |
| PRKD2    | 1.788888   |
| PRKD3    | 0.42910242 |
| PRKG1    | 4.5842724  |
| PRKG2    | 2.7367797  |
| PRKX     | 1.8347335  |
| PRL2C1   | 3.8263526  |
| PRM2     | 1.7070208  |
| PRMT1    | 0.16884708 |
| PRMT2    | 3.3532043  |
| PRMT8    | 1.0053577  |
| PRNP     | 0.17931986 |
| PROK2    | 7.693137   |
| PRPF18   | 0.33408403 |
| PRPF3    | 0.7009959  |
| PRPF31   | 0.31762886 |
| PRPF38B  | 1.0612922  |
| PRPF39   | 0.5905552  |
| PRPF4    | 0.3029189  |
| PRPF4B   | 0.55014944 |
| PRPS2    | 0.46595    |
| PRR11    | 0.43663454 |
| PRR13    | 0.8510728  |
| PRR15    | 0.9165797  |
| PRR15L   | 6.025629   |
| PRR18    | 4.5012083  |
| PRR24    | 0.73805094 |
| PRR5L    | 1.7691622  |
| PRR7     | 3.565599   |
| PRR9     | 1.5788505  |
| PRRC2B   | 0.6069088  |



|          |            |
|----------|------------|
| PRRC2C   | 2.0550933  |
| PRRG1    | 1.5004306  |
| PRRG3    | 6.6072206  |
| PRRG4    | 0.7507026  |
| PRRT1    | 0.8804915  |
| PRRX1    | 1.494211   |
| PRRX2    | 2.5782256  |
| PRSS12   | 3.6842656  |
| PRSS16   | 2.4946163  |
| PRSS23   | 4.8718743  |
| PRSS23OS | 5.140292   |
| PRSS34   | 2.957096   |
| PRSS53   | 2.2925448  |
| PRSS8    | 1.0526834  |
| PRX      | 8.788921   |
| PSAPL1   | 1.1039062  |
| PSAT1    | 0.40969563 |
| PSCA     | 1.1929209  |
| PSD      | 1.2055554  |
| PSD4     | 0.6300683  |
| PSG16    | 0.716938   |
| PSIP1    | 0.28275585 |
| PSMC3IP  | 0.44608712 |
| PSORS1C2 | 0.71396065 |
| PSTPIP1  | 1.2061639  |
| PSTPIP2  | 0.58362293 |
| PTAFR    | 3.4636478  |
| PTAR1    | 1.312592   |
| PTBP3    | 1.0716581  |
| PTGER1   | 1.4661734  |
| PTGER2   | 0.4827478  |
| PTGER3   | 1.5116742  |
| PTGER4   | 2.7279282  |
| PTGFR    | 1.1900725  |
| PTGFRN   | 2.8422437  |
| PTGIR    | 2.7682824  |
| PTGIS    | 3.4263072  |
| PTGS2    | 6.2398024  |
| PTHLH    | 1.7333012  |
| PTK2     | 0.57645607 |
| PTK7     | 1.1999607  |
| PTN      | 1.1693103  |
| PTPN1    | 0.8138447  |
| PTPN11   | 0.5402045  |
| PTPN12   | 1.8772249  |

|         |            |
|---------|------------|
| PTPN13  | 3.5737891  |
| PTPN14  | 4.0528903  |
| PTPN18  | 0.79622936 |
| PTPN2   | 0.9052863  |
| PTPN21  | 0.9295316  |
| PTPN22  | 1.9923291  |
| PTPN23  | 1.2410903  |
| PTPN4   | 0.8299439  |
| PTPN6   | 0.86703825 |
| PTPN7   | 1.490644   |
| PTPRC   | 2.0226564  |
| PTPRCAP | 0.9397001  |
| PTPRE   | 2.3437748  |
| PTPRG   | 1.8030443  |
| PTPRK   | 0.8917608  |
| PTPRM   | 1.0781255  |
| PTPRO   | 2.0260015  |
| PTPRS   | 1.3498111  |
| PTPRU   | 3.068933   |
| PTPRZ1  | 2.8659678  |
| PTRF    | 2.5336637  |
| PTX3    | 4.6716905  |
| PUM2    | 0.6091533  |
| PURA    | 0.26820135 |
| PURB    | 0.9543309  |
| PURG    | 0.22872734 |
| PUS7L   | 0.20211864 |
| PVR     | 3.2025685  |
| PVRL3   | 0.9295912  |
| PVRL4   | 1.2090182  |
| PWWP2A  | 0.7063494  |
| PWWP2B  | 1.2573013  |
| PXDN    | 1.6234727  |
| PXN     | 1.3634577  |
| PYCARD  | 1.3426914  |
| PYCR2   | 0.24477482 |
| PYDC4   | 2.1701827  |
| PYGM    | 2.364903   |
| PYGO2   | 0.30900002 |
| PYHIN1  | 2.6864548  |
| PYY     | 1.0888717  |
| QK      | 2.3446302  |
| QSER1   | 0.3797059  |
| QTRTD1  | 0.15965629 |
| R74862  | 0.46934795 |

|           |            |
|-----------|------------|
| RAB10OS   | 0.5077014  |
| RAB11FIP1 | 1.8877249  |
| RAB11FIP5 | 1.564404   |
| RAB12     | 0.69763327 |
| RAB15     | 8.083715   |
| RAB19     | 0.7276211  |
| RAB20     | 0.6507535  |
| RAB25     | 5.510413   |
| RAB27A    | 3.93758    |
| RAB27B    | 2.8734736  |
| RAB28     | 0.30050325 |
| RAB2B     | 0.38990688 |
| RAB31     | 0.8471117  |
| RAB33A    | 0.44228292 |
| RAB33B    | 0.6525245  |
| RAB34     | 0.1796751  |
| RAB35     | 0.59938145 |
| RAB37     | 0.43202543 |
| RAB38     | 1.0428562  |
| RAB3C     | 1.4463372  |
| RAB44     | 5.034681   |
| RAB6A     | 0.5017586  |
| RAB6B     | 5.015742   |
| RAB7      | 0.27082586 |
| RAB8B     | 1.8024306  |
| RABEP2    | 0.34148884 |
| RABGAP1   | 1.2044878  |
| RABGAP1L  | 1.6371298  |
| RABGEF1   | 0.351964   |
| RABL2     | 0.9423766  |
| RAC2      | 1.3986683  |
| RAC3      | 1.7256742  |
| RACGAP1   | 0.38884306 |
| RAD18     | 0.56302977 |
| RAD21     | 0.3489251  |
| RAD52     | 0.24236393 |
| RADIL     | 3.511662   |
| RAE1      | 0.22298717 |
| RAI1      | 0.754375   |
| RAI14     | 0.6215987  |
| RALA      | 0.4776678  |
| RALB      | 1.714674   |
| RALBP1    | 0.7759185  |
| RALGAPA1  | 2.2665281  |
| RALGAPA2  | 0.8104501  |

|          |            |
|----------|------------|
| RALGAPB  | 1.1197987  |
| RALGDS   | 3.1212907  |
| RAMP2    | 1.6983714  |
| RAMP3    | 3.0251808  |
| RANBP2   | 0.4002509  |
| RANBP9   | 0.8536401  |
| RAP1A    | 0.5527749  |
| RAP1B    | 1.5412989  |
| RAP1GAP  | 0.4596672  |
| RAP1GAP2 | 0.5980146  |
| RAP1GDS1 | 0.5368886  |
| RAP2A    | 0.9421091  |
| RAPGEF2  | 0.25174904 |
| RAPGEF3  | 3.3019147  |
| RAPGEF5  | 3.994835   |
| RAPGEF6  | 1.4912391  |
| RAPGEFL1 | 1.5846214  |
| RARA     | 0.40782595 |
| RARG     | 0.7367921  |
| RARS     | 0.3964467  |
| RASA1    | 0.36730003 |
| RASA2    | 2.259202   |
| RASA3    | 1.0838737  |
| RASAL3   | 1.2331343  |
| RASD1    | 3.1002188  |
| RASD2    | 1.4568906  |
| RASEF    | 4.0763326  |
| RASGEF1A | 8.817668   |
| RASGEF1B | 0.28223705 |
| RASGEF1C | 2.3803074  |
| RASGRF1  | 0.6192608  |
| RASGRP1  | 1.2764997  |
| RASGRP3  | 1.118226   |
| RASGRP4  | 2.1191669  |
| RASIP1   | 4.5758495  |
| RASL10A  | 1.6571286  |
| RASL11A  | 2.673448   |
| RASL12   | 5.654298   |
| RASSF1   | 2.1357212  |
| RASSF2   | 2.3389897  |
| RASSF5   | 0.8511529  |
| RASSF9   | 5.3295336  |
| RAVER2   | 1.0841665  |
| RB1      | 1.5032654  |
| RB1CC1   | 0.5832615  |

|         |            |
|---------|------------|
| RBAK    | 0.8861456  |
| RBAKDN  | 0.45697093 |
| RBBP6   | 0.33284712 |
| RBBP8NL | 2.679793   |
| RBFOX1  | 1.9792335  |
| RBL1    | 0.30606985 |
| RBM12   | 0.33474207 |
| RBM12B2 | 0.6510792  |
| RBM15B  | 0.6147599  |
| RBM18   | 0.704175   |
| RBM24   | 4.5957565  |
| RBM26   | 0.19499636 |
| RBM27   | 1.3045025  |
| RBM28   | 0.3517518  |
| RBM38   | 0.4544587  |
| RBM39   | 0.76227856 |
| RBM41   | 1.473377   |
| RBM43   | 0.32346678 |
| RBM48   | 0.8409867  |
| RBM5    | 0.9070673  |
| RBMS1   | 1.676271   |
| RBMS2   | 0.7363038  |
| RBMS3   | 2.7997003  |
| RBMX2   | 0.40076423 |
| RBMXL1  | 0.6071787  |
| RBP7    | 2.633438   |
| RBPJ    | 1.6413164  |
| RBPJL   | 5.026192   |
| RBPMS   | 0.6417036  |
| RC3H1   | 0.33118725 |
| RC3H2   | 0.9743881  |
| RCN1    | 1.288331   |
| RCN2    | 0.59123325 |
| RCN3    | 0.38546944 |
| RCOR1   | 0.463943   |
| RCSD1   | 1.8237047  |
| RD3     | 1.6838887  |
| RECK    | 2.866955   |
| RECQL   | 1.2456975  |
| REEP1   | 0.22692299 |
| REEP5   | 1.2163625  |
| REG3G   | 8.641827   |
| RELA    | 0.9156637  |
| RELB    | 2.6883588  |
| RELL1   | 0.90778923 |

|        |            |
|--------|------------|
| RELT   | 1.4378161  |
| REP15  | 0.9839959  |
| REPS1  | 0.5460911  |
| RERE   | 0.8477428  |
| RERG   | 0.8226299  |
| RESP18 | 2.3930383  |
| REST   | 1.8359437  |
| RET    | 0.98024154 |
| RETN   | 2.6835551  |
| RETNLA | 6.3735905  |
| RETNLG | 4.451732   |
| REV3L  | 2.763111   |
| RFTN1  | 1.1073055  |
| RFTN2  | 2.943925   |
| RFX2   | 1.5628126  |
| RFX3   | 1.14523    |
| RFX8   | 0.60885835 |
| RGCC   | 8.427204   |
| RGL2   | 0.27371788 |
| RGMB   | 1.5645123  |
| RGS1   | 2.4324455  |
| RGS10  | 0.7248597  |
| RGS11  | 3.139392   |
| RGS12  | 0.5222111  |
| RGS14  | 1.3015451  |
| RGS17  | 3.2127638  |
| RGS18  | 3.9789877  |
| RGS19  | 1.4844856  |
| RGS2   | 1.6964798  |
| RGS22  | 1.810163   |
| RGS3   | 0.7478938  |
| RGS4   | 2.769014   |
| RGS6   | 1.5748324  |
| RGS9   | 4.5687084  |
| RHBDF1 | 0.822361   |
| RHBDF2 | 1.2134175  |
| RHBDL3 | 4.051608   |
| RHD    | 1.7701504  |
| RHEBL1 | 0.69332314 |
| RHOB   | 3.082768   |
| RHOC   | 2.7901978  |
| RHOF   | 2.1778812  |
| RHOG   | 0.60360146 |
| RHOJ   | 3.4088736  |
| RHOQ   | 0.94138193 |

|         |            |
|---------|------------|
| RHOV    | 1.6861305  |
| RIBC2   | 0.3846414  |
| RIC8    | 0.6329117  |
| RICTOR  | 1.1012893  |
| RIF1    | 0.6498151  |
| RIIAD1  | 2.6448655  |
| RILPL1  | 1.3691087  |
| RIMKLA  | 0.96198726 |
| RIN2    | 2.867825   |
| RIN3    | 3.6291313  |
| RINL    | 1.2026262  |
| RIOK1   | 0.7687688  |
| RIPK1   | 0.45142078 |
| RIPK2   | 2.995835   |
| RIPK3   | 0.8183842  |
| RIPK4   | 0.5080652  |
| RIPPLY3 | 0.64932775 |
| RLF     | 0.6856632  |
| RLIM    | 2.3361712  |
| RMRP    | 1.1029024  |
| RN18S   | 5.994026   |
| RNASE10 | 0.72091913 |
| RNASE2A | 3.9018526  |
| RNASE6  | 0.4640994  |
| RNASEL  | 2.2504845  |
| RND1    | 1.8884091  |
| RND3    | 0.29493713 |
| RNF111  | 0.36491632 |
| RNF114  | 0.49373055 |
| RNF122  | 0.6991093  |
| RNF144A | 2.230914   |
| RNF146  | 0.7450037  |
| RNF150  | 2.358594   |
| RNF157  | 0.6258185  |
| RNF19A  | 0.4511633  |
| RNF19B  | 1.4693184  |
| RNF20   | 0.61532927 |
| RNF207  | 3.208083   |
| RNF208  | 2.7764513  |
| RNF213  | 0.7813945  |
| RNF219  | 0.71993876 |
| RNF32   | 1.4613957  |
| RNF34   | 0.8365464  |
| RNF38   | 1.5370321  |
| RNF39   | 1.0906582  |

|            |            |
|------------|------------|
| RNF41      | 0.22832203 |
| RNF44      | 0.63478994 |
| RNF6       | 0.24786282 |
| RNFT2      | 1.0436623  |
| RNGTT      | 0.5746689  |
| RNLS       | 0.58798504 |
| RNMT       | 0.8942399  |
| RNPC3      | 0.4590621  |
| RNU1B6     | 2.6546693  |
| RNU2-10    | 0.7242198  |
| ROBO1      | 1.4444027  |
| ROBO2      | 1.4847262  |
| ROBO4      | 2.3280516  |
| ROCK1      | 1.1575179  |
| ROCK2      | 2.554903   |
| ROR2       | 3.694396   |
| RP2H       | 1.0705342  |
| RPGR       | 1.1168971  |
| RPGRIP1    | 2.538437   |
| RPGRIP1L   | 1.1139598  |
| RPH3AL     | 0.8428488  |
| RPIA       | 0.9474001  |
| RPL29      | 0.33438778 |
| RPL39L     | 0.71271324 |
| RPL3L      | 1.1517112  |
| RPRD1A     | 0.67224836 |
| RPRD2      | 1.1636233  |
| RPRM       | 4.5289054  |
| RPRML      | 0.6624832  |
| RPS15A-PS6 | 1.4411702  |
| RPS19      | 0.52801037 |
| RPS6KA2    | 2.1252697  |
| RPS6KA3    | 2.0062404  |
| RPS6KA4    | 0.18949413 |
| RPS6KA5    | 0.5891967  |
| RPS6KA6    | 0.3327148  |
| RPS6KL1    | 0.92948294 |
| RPTN       | 0.7708168  |
| RPTOROS    | 0.70230436 |
| RRAD       | 2.5686693  |
| RRAGB      | 1.0447319  |
| RRAGD      | 1.6462576  |
| RRAS2      | 0.42335367 |
| RRM2B      | 0.47084785 |
| RRP12      | 0.46013832 |



|          |            |
|----------|------------|
| RRP1B    | 1.8980103  |
| RS1      | 0.66069794 |
| RS5-8S1  | 2.036893   |
| RSAD2    | 1.9452262  |
| RSBN1    | 0.7731142  |
| RSBN1L   | 0.94318485 |
| RSF1     | 0.48096514 |
| RSL1     | 0.8589859  |
| RSPH1    | 4.190524   |
| RSPH10B  | 1.1468444  |
| RSPH3A   | 3.1297464  |
| RSPH4A   | 0.89225197 |
| RSPH9    | 3.581729   |
| RSPO1    | 1.9059086  |
| RSRC2    | 0.6375909  |
| RTDR1    | 2.909535   |
| RTKN2    | 6.9270554  |
| RTN1     | 1.2774911  |
| RTN2     | 0.61907864 |
| RTP4     | 1.1063418  |
| RTTN     | 0.88264656 |
| RUFY2    | 0.46422672 |
| RUFY4    | 1.3684607  |
| RUNDC3B  | 1.0497591  |
| RUNX1    | 4.121807   |
| RUNX1T1  | 3.965445   |
| RUNX2OS1 | 2.3691885  |
| RUNX3    | 1.1292484  |
| RUSC1    | 0.36011457 |
| RYBP     | 1.35045    |
| RYR1     | 0.849123   |
| RYR2     | 2.245209   |
| RYR3     | 0.6815572  |
| S100A11  | 2.2135425  |
| S100A14  | 4.1126237  |
| S100A2   | 1.0858102  |
| S100A3   | 0.65657973 |
| S100A4   | 2.9955673  |
| S100A6   | 4.4279766  |
| S100A8   | 4.8721094  |
| S100A9   | 2.5442257  |
| S100B    | 2.2110102  |
| S100G    | 3.3281837  |
| S100PBP  | 0.31089115 |
| S1PR1    | 2.113883   |

|         |            |
|---------|------------|
| S1PR3   | 3.504467   |
| S1PR4   | 2.4199169  |
| SAA3    | 3.116706   |
| SACS    | 0.67246175 |
| SALL2   | 0.49350762 |
| SAMD12  | 2.3403459  |
| SAMD14  | 1.5067024  |
| SAMD3   | 1.0090435  |
| SAMD4   | 3.890999   |
| SAMD4B  | 1.0625854  |
| SAMD5   | 1.3446832  |
| SAMD8   | 0.4388821  |
| SAMD9L  | 2.1551704  |
| SAMHD1  | 1.1291165  |
| SAMSN1  | 4.6885266  |
| SAP130  | 0.18659782 |
| SAP25   | 0.36186743 |
| SAP30   | 1.5244055  |
| SAPCD1  | 1.4403796  |
| SAPCD2  | 0.25102305 |
| SASH1   | 1.0620275  |
| SASH3   | 1.3089461  |
| SASS6   | 1.0781488  |
| SATB1   | 2.257001   |
| SAV1    | 2.5499244  |
| SBF2    | 0.68685675 |
| SBK3    | 5.4837966  |
| SBNO2   | 1.7495742  |
| SBSN    | 2.3917356  |
| SCAF8   | 0.34544563 |
| SCAPER  | 0.7178383  |
| SCARF2  | 2.2671485  |
| SCCPDH  | 0.9401059  |
| SCD2    | 2.2596197  |
| SCD4    | 2.1085014  |
| SCEL    | 4.856464   |
| SCG3    | 0.8859656  |
| SCG5    | 2.3021457  |
| SCGB1A1 | 11.278034  |
| SCGB1C1 | 5.7466073  |
| SCGB3A1 | 9.760004   |
| SCGB3A2 | 8.115032   |
| SCHIP1  | 3.6133676  |
| SCIN    | 2.4945078  |
| SCML2   | 0.519912   |

|           |            |
|-----------|------------|
| SCML4     | 2.0343893  |
| SCN10A    | 1.153842   |
| SCN2B     | 1.3465753  |
| SCN3A     | 1.9476409  |
| SCN3B     | 3.287846   |
| SCN7A     | 4.545292   |
| SCNN1A    | 3.8388033  |
| SCNN1B    | 5.333286   |
| SCOC      | 0.45987988 |
| SCRG1     | 5.0145116  |
| SCRN1     | 4.6063757  |
| SCT       | 0.60837317 |
| SCUBE1    | 2.3092604  |
| SCUBE2    | 6.321313   |
| SCUBE3    | 1.4607091  |
| SCX       | 3.1711555  |
| SDAD1     | 0.98068905 |
| SDCBP     | 1.4473896  |
| SDCBP2    | 2.5887423  |
| SDCCAG8   | 0.52273655 |
| SDE2      | 0.1895504  |
| SDK1      | 0.3478601  |
| SDPR      | 0.9781523  |
| SEC1      | 2.7899768  |
| SEC14L1   | 2.0143204  |
| SEC14L3   | 6.4347615  |
| SEC24B    | 0.9128008  |
| SEC61A2   | 0.63547015 |
| SECISBP2  | 0.77293444 |
| SECISBP2L | 1.8718216  |
| SELE      | 5.229238   |
| SELL      | 2.823979   |
| SELM      | 0.6380482  |
| SELP      | 5.174917   |
| SELPLG    | 1.6034193  |
| SEMA3A    | 3.7858646  |
| SEMA3B    | 5.3286905  |
| SEMA3C    | 5.265099   |
| SEMA3E    | 4.0690312  |
| SEMA3F    | 2.4605832  |
| SEMA3G    | 6.9583907  |
| SEMA4D    | 2.747408   |
| SEMA4F    | 1.8739321  |
| SEMA5A    | 5.683233   |
| SEMA6A    | 0.30304766 |

|           |            |
|-----------|------------|
| SEMA6B    | 0.28432512 |
| SEMA7A    | 8.603933   |
| SENP2     | 0.663332   |
| SENP6     | 2.3958895  |
| SENP7     | 1.374136   |
| SENP8     | 1.112185   |
| SEPN1     | 0.29181194 |
| SERINC3   | 0.8998642  |
| SERINC4   | 2.0785265  |
| SERP2     | 1.7101767  |
| SERPINA3B | 1.3147435  |
| SERPINA3F | 2.9694915  |
| SERPINA3G | 1.0075922  |
| SERPINA3I | 2.4233274  |
| SERPINA9  | 3.0089457  |
| SERPINB10 | 3.7508671  |
| SERPINB1A | 3.0940685  |
| SERPINB1B | 0.896626   |
| SERPINB2  | 3.6908996  |
| SERPINB3C | 1.0569899  |
| SERPINB5  | 0.37563896 |
| SERPINB6A | 0.61052465 |
| SERPINB6B | 4.684094   |
| SERPINB6C | 0.5280466  |
| SERPINB9  | 2.1950812  |
| SERPINE1  | 7.346191   |
| SERPINE2  | 3.0350637  |
| SERPINH1  | 2.068562   |
| SERPINI1  | 0.61506677 |
| SERTAD1   | 1.1433415  |
| SERTAD2   | 0.7374921  |
| SERTAD4   | 0.3063755  |
| SESTD1    | 2.7095318  |
| SETBP1    | 3.5321012  |
| SETD1B    | 0.47248077 |
| SETD2     | 0.6604042  |
| SETD5     | 1.7639184  |
| SETD7     | 1.1421766  |
| SETX      | 0.4062066  |
| SF3B1     | 0.6564827  |
| SF3B4     | 0.39947605 |
| SFI1      | 2.1294851  |
| SFMBT2    | 0.6668594  |
| SFN       | 1.4701617  |
| SFPQ      | 0.5394702  |

|          |            |
|----------|------------|
| SFRP1    | 0.8909981  |
| SFRP2    | 3.4973469  |
| SFRP4    | 1.2860467  |
| SFRP5    | 2.1014583  |
| SFSWAP   | 0.9534812  |
| SFTA2    | 7.6794744  |
| SFTPA1   | 10.291235  |
| SFTPB    | 10.449566  |
| SFTPC    | 10.767405  |
| SFTPD    | 7.6676183  |
| SFXN3    | 2.4116082  |
| SFXN4    | 0.8432245  |
| SGCA     | 1.9852648  |
| SGCB     | 1.4125876  |
| SGCD     | 0.59060335 |
| SGCE     | 1.5265884  |
| SGCG     | 1.0736511  |
| SGIP1    | 1.0275667  |
| SGK1     | 1.0630302  |
| SGMS1    | 2.574059   |
| SGPP2    | 2.970663   |
| SH2B2    | 1.4058237  |
| SH2B3    | 0.60112    |
| SH2D1A   | 2.0535975  |
| SH2D1B1  | 2.515869   |
| SH2D2A   | 1.3051696  |
| SH2D3C   | 1.9605746  |
| SH2D5    | 1.8186798  |
| SH3BGR   | 4.035409   |
| SH3BGRL3 | 1.3113227  |
| SH3BP4   | 2.2589068  |
| SH3D21   | 3.3096557  |
| SH3GL3   | 3.5806847  |
| SH3KBP1  | 2.7350807  |
| SH3PXD2A | 1.7180023  |
| SH3PXD2B | 3.0840063  |
| SH3RF1   | 0.9242525  |
| SH3RF3   | 0.9014709  |
| SH3TC1   | 1.6924081  |
| SH3TC2   | 0.6783757  |
| SHANK3   | 3.3796449  |
| SHC4     | 1.6179919  |
| SHE      | 0.34222555 |
| SHH      | 2.1643555  |
| SHISA4   | 0.50420666 |

|         |            |
|---------|------------|
| SHISA5  | 0.6823139  |
| SHISA7  | 0.6874807  |
| SHOC2   | 0.37496233 |
| SHROOM3 | 1.4078419  |
| SIAH1A  | 0.5807185  |
| SIAH3   | 0.5064573  |
| SIDT1   | 1.6576071  |
| SIGLEC5 | 3.3283014  |
| SIGLECE | 0.39059305 |
| SIGLECG | 1.0042188  |
| SIK1    | 2.236465   |
| SIK2    | 0.30270863 |
| SIKE1   | 0.9682026  |
| SIM2    | 0.31435776 |
| SIMC1   | 0.39068604 |
| SIPA1   | 0.7578969  |
| SIPA1L2 | 1.767786   |
| SIPA1L3 | 1.8745718  |
| SIRPB1A | 2.350892   |
| SIRPB1B | 2.261434   |
| SIRT1   | 0.8584819  |
| SIT1    | 0.94146657 |
| SIX1    | 3.4754803  |
| SIX4    | 3.9160993  |
| SKA1    | 0.43206    |
| SKAP1   | 1.4283557  |
| SKAP2   | 1.2855291  |
| SKIL    | 1.7539577  |
| SKIV2L2 | 0.716321   |
| SKOR1   | 1.3932948  |
| SLA     | 2.5568423  |
| SLA2    | 0.20787954 |
| SLAIN1  | 2.2614772  |
| SLAMF1  | 3.2089188  |
| SLAMF6  | 1.162853   |
| SLAMF7  | 1.3540392  |
| SLAMF9  | 1.2549982  |
| SLC10A3 | 0.49882793 |
| SLC10A6 | 4.9036107  |
| SLC10A7 | 2.302988   |
| SLC11A2 | 0.48357582 |
| SLC12A2 | 1.0782948  |
| SLC12A4 | 0.87190723 |
| SLC12A6 | 1.3051624  |
| SLC13A2 | 1.3090076  |

|          |            |
|----------|------------|
| SLC13A4  | 3.8126144  |
| SLC14A1  | 0.38628292 |
| SLC15A2  | 3.4182367  |
| SLC15A3  | 1.4797039  |
| SLC16A13 | 0.8040185  |
| SLC16A3  | 2.9540176  |
| SLC16A6  | 0.35520267 |
| SLC16A8  | 1.4285219  |
| SLC16A9  | 1.946372   |
| SLC18A2  | 0.40431404 |
| SLC18B1  | 0.28739643 |
| SLC19A3  | 1.2918141  |
| SLC1A1   | 4.7322245  |
| SLC1A3   | 2.8566718  |
| SLC1A5   | 3.2892942  |
| SLC22A13 | 1.0250802  |
| SLC22A17 | 1.12813    |
| SLC22A20 | 2.9489074  |
| SLC23A2  | 1.4020858  |
| SLC24A3  | 5.056499   |
| SLC24A4  | 4.7740135  |
| SLC25A24 | 1.9310565  |
| SLC25A27 | 0.2149539  |
| SLC25A35 | 1.8646858  |
| SLC25A36 | 3.5106387  |
| SLC25A4  | 1.9141269  |
| SLC25A41 | 2.4141898  |
| SLC25A43 | 0.97395086 |
| SLC26A2  | 2.089046   |
| SLC26A4  | 2.895932   |
| SLC26A9  | 4.8153367  |
| SLC27A3  | 1.6212811  |
| SLC27A4  | 0.30905676 |
| SLC27A6  | 2.137493   |
| SLC28A2  | 1.2871194  |
| SLC28A3  | 0.87808895 |
| SLC29A4  | 1.6568952  |
| SLC2A1   | 0.7181387  |
| SLC2A10  | 1.5491135  |
| SLC2A12  | 2.4109883  |
| SLC2A13  | 1.2501864  |
| SLC2A3   | 2.170292   |
| SLC2A6   | 2.511568   |
| SLC30A1  | 0.47689438 |
| SLC30A4  | 0.52135324 |

|          |            |
|----------|------------|
| SLC30A7  | 0.25591993 |
| SLC31A2  | 0.35747433 |
| SLC34A2  | 5.9132347  |
| SLC35A4  | 0.22076511 |
| SLC35E3  | 0.6768353  |
| SLC35E4  | 2.6465893  |
| SLC35F2  | 0.5999472  |
| SLC35F3  | 1.3094671  |
| SLC35G2  | 0.7959819  |
| SLC35G3  | 0.7624111  |
| SLC36A2  | 6.397305   |
| SLC37A1  | 0.90890455 |
| SLC38A1  | 2.602707   |
| SLC38A2  | 0.5770955  |
| SLC38A5  | 2.7222233  |
| SLC38A9  | 0.19636583 |
| SLC39A10 | 1.9282403  |
| SLC39A3  | 0.8047209  |
| SLC39A6  | 2.1376495  |
| SLC39A8  | 2.1811838  |
| SLC39A9  | 0.991848   |
| SLC3A2   | 0.7178879  |
| SLC41A1  | 2.2637005  |
| SLC43A2  | 0.77104044 |
| SLC43A3  | 5.589847   |
| SLC44A2  | 1.8235126  |
| SLC44A4  | 3.3945653  |
| SLC47A2  | 1.6176035  |
| SLC4A11  | 1.7323112  |
| SLC4A3   | 1.708581   |
| SLC4A5   | 3.087985   |
| SLC4A8   | 1.5071914  |
| SLC52A3  | 4.3685975  |
| SLC5A1   | 1.7262006  |
| SLC5A3   | 1.1473515  |
| SLC5A9   | 1.2105019  |
| SLC6A14  | 4.3443356  |
| SLC6A2   | 2.9851398  |
| SLC6A20A | 1.2683372  |
| SLC6A4   | 3.153694   |
| SLC6A8   | 0.7728691  |
| SLC7A1   | 3.6754375  |
| SLC7A10  | 5.50683    |
| SLC7A11  | 2.820745   |
| SLC7A3   | 2.1306252  |



|            |            |
|------------|------------|
| SLC7A5     | 0.6709299  |
| SLC7A6     | 3.3314304  |
| SLC8A1     | 1.0782819  |
| SLC8A3     | 0.396235   |
| SLC9A1     | 0.71413136 |
| SLC9A3R2   | 1.070149   |
| SLC9A4     | 2.3843162  |
| SLC9A7     | 0.34965563 |
| SLCO1A5    | 1.8753965  |
| SLCO2A1    | 0.8942461  |
| SLCO3A1    | 3.1290746  |
| SLCO4A1    | 2.58356    |
| SLCO4C1    | 4.3153877  |
| SLFN1      | 3.7920814  |
| SLFN10-PS  | 2.3947449  |
| SLFN2      | 2.491487   |
| SLFN3      | 4.720113   |
| SLFN4      | 7.032175   |
| SLFN5OS    | 0.5931275  |
| SLFN8      | 2.6688747  |
| SLIT2      | 2.9083347  |
| SLIT3      | 3.6585374  |
| SLITRK6    | 1.9050562  |
| SLK        | 0.7932935  |
| SLMO1      | 0.5312524  |
| SLN        | 8.409151   |
| SLPI       | 0.8210511  |
| SLU7       | 0.6114373  |
| SLURP1     | 4.045861   |
| SLX        | 0.14913726 |
| SLX4       | 0.9090066  |
| SLX4IP     | 1.2619388  |
| SMAD1      | 1.1026859  |
| SMAD3      | 0.7149377  |
| SMAD4      | 0.5806265  |
| SMAD5      | 0.18517017 |
| SMAD6      | 1.5518303  |
| SMAD7      | 0.73829126 |
| SMAP1      | 0.57699394 |
| SMARCA1    | 1.6426728  |
| SMARCA5    | 0.23914576 |
| SMARCA5-PS | 1.1400223  |
| SMARCD3    | 0.91725874 |
| SMARCE1    | 0.20830679 |
| SMC3       | 0.58111954 |

|          |            |
|----------|------------|
| SMC4     | 0.5426307  |
| SMC5     | 0.42149878 |
| SMCHD1   | 1.4079032  |
| SMEK2    | 0.56330156 |
| SMG1     | 0.7842927  |
| SMIM15   | 0.59671783 |
| SMIM3    | 3.4762158  |
| SMIM5    | 4.666674   |
| SMOX     | 2.4694905  |
| SMPDL3B  | 2.4028668  |
| SMPX     | 1.8465972  |
| SMS      | 0.85316706 |
| SMTN     | 1.1461139  |
| SMTNL2   | 3.0245266  |
| SMURF2   | 0.24290276 |
| SNAI1    | 3.0365     |
| SNAP23   | 0.77911663 |
| SNAP25   | 0.28923988 |
| SNAPC1   | 1.2628117  |
| SNAPC3   | 1.4736881  |
| SNAPIN   | 0.6045332  |
| SNCA     | 0.37940216 |
| SNCG     | 1.0048966  |
| SNED1    | 0.76673794 |
| SNHG1    | 0.72308826 |
| SNHG11   | 1.1868823  |
| SNHG18   | 1.0893307  |
| SNHG5    | 1.0023823  |
| SNN      | 1.9869962  |
| SNORA74A | 0.86627126 |
| SNRK     | 0.6519532  |
| SNRNP35  | 0.45508528 |
| SNRNP48  | 0.18144655 |
| SNRPC    | 0.16628885 |
| SNRPD1   | 0.48669004 |
| SNRPF    | 0.6835556  |
| SNTB2    | 2.403522   |
| SNTN     | 3.665868   |
| SNX1     | 1.8527904  |
| SNX10    | 0.7539172  |
| SNX11    | 0.2727008  |
| SNX13    | 0.8312998  |
| SNX16    | 0.45484972 |
| SNX17    | 0.49293375 |
| SNX18    | 1.1359396  |

|         |            |
|---------|------------|
| SNX20   | 2.7812905  |
| SNX22   | 3.5930617  |
| SNX25   | 1.7624836  |
| SNX27   | 0.37457657 |
| SNX29   | 1.3742037  |
| SNX30   | 0.49314404 |
| SOAT1   | 1.212894   |
| SOBP    | 3.195225   |
| SOCS1   | 1.656045   |
| SOCS2   | 2.016519   |
| SOCS3   | 3.4395528  |
| SOCS4   | 0.82553387 |
| SOCS5   | 1.4294734  |
| SOCS7   | 0.9182911  |
| SOD3    | 1.1646786  |
| SOGA1   | 1.3390036  |
| SON     | 0.73415375 |
| SORBS3  | 0.6004801  |
| SORCS2  | 2.5680022  |
| SORL1   | 4.252915   |
| SORT1   | 3.1840472  |
| SOS2    | 0.60000134 |
| SOWAHC  | 1.4723582  |
| SOX10   | 0.83012843 |
| SOX17   | 1.3893733  |
| SOX18   | 1.2547894  |
| SOX2    | 3.8172615  |
| SOX20T  | 0.65589666 |
| SOX4    | 1.4164133  |
| SOX7    | 3.7901816  |
| SP100   | 1.3712807  |
| SP140   | 0.8653307  |
| SP2     | 2.2232747  |
| SP3OS   | 0.8181925  |
| SP4     | 0.89664364 |
| SP6     | 1.0648999  |
| SPA17   | 1.2987905  |
| SPACA6  | 1.7675862  |
| SPAG1   | 1.1514001  |
| SPAG16  | 1.9436998  |
| SPAG17  | 1.1673546  |
| SPAG6   | 5.374623   |
| SPAG9   | 0.4834051  |
| SPARC   | 1.2402949  |
| SPARCL1 | 5.5523257  |

|            |            |
|------------|------------|
| SPATA1     | 0.74857664 |
| SPATA13    | 1.1319308  |
| SPATA17    | 1.0049207  |
| SPATA18    | 3.111645   |
| SPATA2     | 0.234303   |
| SPATA31    | 0.6995306  |
| SPATA31D1B | 0.6125941  |
| SPATA5     | 0.42021656 |
| SPATA5L1   | 0.9305148  |
| SPATA6     | 2.009529   |
| SPATA7     | 0.37408686 |
| SPATS2     | 0.3269539  |
| SPATS2L    | 0.5370574  |
| SPDEF      | 1.6280565  |
| SPECC1     | 1.3890843  |
| SPECC1L    | 1.8139496  |
| SPEER4C    | 1.499176   |
| SPEER5-PS1 | 1.4377599  |
| SPEF1      | 1.7675982  |
| SPEF2      | 2.1088166  |
| SPEG       | 0.4597757  |
| SPEM1      | 1.5827065  |
| SPEN       | 0.3747964  |
| SPHK1      | 7.3345294  |
| SPI1       | 1.6285114  |
| SPIB       | 2.4024901  |
| SPICE1     | 1.0185385  |
| SPIDR      | 1.1277518  |
| SPIN4      | 1.5360177  |
| SPINK2     | 2.324999   |
| SPINK4     | 1.770184   |
| SPINK5     | 2.337437   |
| SPINT1     | 3.092164   |
| SPIRE1     | 1.5199199  |
| SPN        | 2.6427789  |
| SPOCK2     | 6.4678493  |
| SPON1      | 4.551349   |
| SPOPL      | 0.8050003  |
| SPPL3      | 0.39296865 |
| SPRED1     | 1.5664315  |
| SPRED2     | 1.6167502  |
| SPRTN      | 0.43918943 |
| SPRY1      | 2.2414947  |
| SPRY2      | 1.8779514  |
| SPRY4      | 0.5404625  |

|            |            |
|------------|------------|
| SPRYD7     | 0.31255913 |
| SPSB1      | 0.7869885  |
| SPTA1      | 0.8843427  |
| SPTAN1     | 0.8940997  |
| SPTBN1     | 3.368956   |
| SPTLC2     | 1.7074208  |
| SPTLC3     | 1.2044702  |
| SPTY2D1    | 0.37198687 |
| SRCAP      | 1.041615   |
| SRCIN1     | 2.9839365  |
| SRF        | 0.52607775 |
| SRFBP1     | 0.247262   |
| SRGAP1     | 2.7759104  |
| SRGAP3     | 0.46273446 |
| SRGN       | 3.0422883  |
| SRI        | 0.89446974 |
| SRL        | 3.7552526  |
| SRPK2      | 1.2687883  |
| SRPK3      | 1.4237773  |
| SRPX       | 4.950929   |
| SRRM2      | 1.329279   |
| SRRT       | 0.62632227 |
| SRSF10     | 0.67602396 |
| SRSF11     | 0.9128084  |
| SRSF3      | 1.0289345  |
| SRSF4      | 0.24276781 |
| SRSF7      | 0.590538   |
| SS18       | 0.34434748 |
| SSB        | 1.3053427  |
| SSBP2      | 0.21665859 |
| SSH2       | 1.2935119  |
| SSH3       | 0.5796304  |
| SSPN       | 1.7931533  |
| ST14       | 2.8108578  |
| ST3GAL1    | 0.6521025  |
| ST3GAL2    | 2.4500127  |
| ST3GAL6    | 3.2517638  |
| ST6GALNAC1 | 1.5341692  |
| ST6GALNAC2 | 3.8219848  |
| ST6GALNAC5 | 2.2075992  |
| ST8SIA1    | 1.089792   |
| ST8SIA4    | 1.9146438  |
| ST8SIA6    | 1.9811893  |
| STAC       | 0.37127233 |
| STAG1      | 0.209826   |

|          |            |
|----------|------------|
| STAG2    | 0.7252712  |
| STAM     | 0.46688318 |
| STAM2    | 1.0439949  |
| STAMBPL1 | 0.6750097  |
| STAP1    | 1.7338881  |
| STAR     | 0.23302221 |
| STARD13  | 0.6431508  |
| STARD3   | 0.46450472 |
| STARD3NL | 0.62155867 |
| STARD6   | 0.4254992  |
| STARD8   | 0.58276796 |
| STAT1    | 0.62836695 |
| STAT3    | 0.8424425  |
| STAT4    | 2.2619848  |
| STAU2    | 0.27547956 |
| STC2     | 0.5888736  |
| STEAP1   | 3.8926423  |
| STFA1    | 6.305588   |
| STFA2    | 5.5144706  |
| STFA2L1  | 6.0736046  |
| STFA3    | 6.429322   |
| STIL     | 0.66567326 |
| STK10    | 1.053586   |
| STK17B   | 2.1373224  |
| STK19    | 0.16534996 |
| STK24    | 0.4711361  |
| STK3     | 0.7081084  |
| STK32A   | 0.96453595 |
| STK33    | 5.8739533  |
| STK35    | 0.2652135  |
| STK36    | 2.185643   |
| STK39    | 1.2963347  |
| STK4     | 1.0910583  |
| STK40    | 0.27798176 |
| STMN2    | 3.3237762  |
| STMN4    | 1.3680801  |
| STMND1   | 2.7360876  |
| STON1    | 1.9879708  |
| STRA6    | 2.78814    |
| STRADA   | 0.62690926 |
| STRIP2   | 2.5587559  |
| STRN     | 1.273814   |
| STRN3    | 0.63639116 |
| STX11    | 3.636796   |
| STX12    | 0.81426096 |

|          |            |
|----------|------------|
| STX16    | 0.91084194 |
| STX19    | 2.201543   |
| STX3     | 1.2694983  |
| STX6     | 1.4961057  |
| STX7     | 1.0419564  |
| STXBP1   | 2.2906318  |
| STXBP3A  | 0.55166864 |
| STXBP3B  | 1.4542279  |
| STXBP5   | 0.69432306 |
| STYX     | 1.2545757  |
| STYXL1   | 2.788841   |
| SUCO     | 1.451539   |
| SUFU     | 0.7236111  |
| SUGP2    | 0.3132496  |
| SULF1    | 2.8177867  |
| SULF2    | 0.16092539 |
| SULT2B1  | 1.3995173  |
| SUMO1    | 0.38395834 |
| SUMO2    | 0.33246994 |
| SUN1     | 0.5653391  |
| SUPT20   | 0.29198575 |
| SUSD2    | 1.0710418  |
| SUSD3    | 0.5008149  |
| SUSD4    | 5.040219   |
| SUSD5    | 0.17503    |
| SUV39H1  | 1.853116   |
| SUV420H1 | 1.0027084  |
| SVEP1    | 3.2529683  |
| SVIL     | 1.4627357  |
| SWAP70   | 1.3671279  |
| SWT1     | 0.59916687 |
| SYDE1    | 1.8119135  |
| SYF2     | 1.3955865  |
| SYK      | 2.0052514  |
| SYN2     | 2.089811   |
| SYN3     | 0.41163468 |
| SYNC     | 2.182991   |
| SYNCRIP  | 0.7604456  |
| SYNE1    | 2.2783427  |
| SYNE2    | 1.3978629  |
| SYNGR1   | 2.5080562  |
| SYNJ1    | 1.3173022  |
| SYNM     | 3.7112541  |
| SYNPO    | 2.1946392  |
| SYNPO2   | 2.8434281  |

|          |            |
|----------|------------|
| SYNRG    | 0.5071058  |
| SYT11    | 2.1184201  |
| SYT13    | 4.0347557  |
| SYT15    | 0.68123865 |
| SYT5     | 5.222079   |
| SYTL2    | 2.0603137  |
| SYTL3    | 1.9412942  |
| T2       | 3.6358478  |
| TAB2     | 0.34160948 |
| TACC1    | 1.4061165  |
| TACR2    | 0.3151393  |
| TACSTD2  | 2.1968966  |
| TAF1     | 1.7299528  |
| TAF1C    | 0.30359173 |
| TAF1D    | 0.66026115 |
| TAF3     | 0.8108201  |
| TAF5     | 0.5725572  |
| TAF7     | 1.1247337  |
| TAF7L    | 0.8712292  |
| TAF8     | 0.88134766 |
| TAF9B    | 2.3712404  |
| TAGAP    | 2.1010413  |
| TAGAP1   | 1.2462978  |
| TAGLN    | 1.32198    |
| TAGLN2   | 2.0207329  |
| TAL1     | 2.0162988  |
| TANC1    | 1.5543118  |
| TANC2    | 1.969806   |
| TANGO6   | 0.35024    |
| TANK     | 1.7065587  |
| TAOK1    | 1.3204751  |
| TARDBP   | 0.21717358 |
| TARM1    | 3.2839108  |
| TAS2R131 | 1.5084417  |
| TASP1    | 0.68871593 |
| TAX1BP1  | 0.84463835 |
| TAX1BP3  | 0.39791727 |
| TBC1D1   | 0.40587473 |
| TBC1D10B | 0.91433096 |
| TBC1D10C | 1.0663757  |
| TBC1D12  | 1.0343037  |
| TBC1D16  | 1.4330401  |
| TBC1D19  | 1.1404619  |
| TBC1D2   | 2.113173   |
| TBC1D20  | 1.374248   |



|          |            |
|----------|------------|
| TBC1D22B | 0.51779556 |
| TBC1D23  | 0.8444538  |
| TBC1D30  | 0.3190012  |
| TBC1D4   | 0.92862654 |
| TBC1D5   | 1.5746298  |
| TBC1D8   | 2.2812598  |
| TBC1D9   | 0.8266704  |
| TBCK     | 0.78915477 |
| TBK1     | 1.1977406  |
| TBKBP1   | 0.7923789  |
| TBPL1    | 0.7009449  |
| TBX1     | 6.8795447  |
| TBX2     | 2.013599   |
| TBX21    | 1.846847   |
| TBX22    | 1.4749739  |
| TBX3     | 0.99094486 |
| TBX4     | 7.7283225  |
| TBX5     | 7.2882733  |
| TBX6     | 0.5116956  |
| TC2N     | 2.796216   |
| TCAP     | 6.623627   |
| TCEAL1   | 0.96842194 |
| TCEAL3   | 1.401717   |
| TCEAL6   | 3.684628   |
| TCEAL7   | 1.8774867  |
| TCEAL8   | 0.42838144 |
| TCERG1   | 0.6921234  |
| TCF12    | 0.22403145 |
| TCF15    | 3.8338933  |
| TCF21    | 2.3593345  |
| TCF23    | 1.5814164  |
| TCF4     | 2.3739147  |
| TCF7     | 0.77908754 |
| TCHH     | 3.5976286  |
| TCHP     | 0.44760132 |
| TCOF1    | 1.1587014  |
| TCP10B   | 0.6226902  |
| TCP10C   | 0.8977308  |
| TCP11    | 3.1089172  |
| TCP11L2  | 0.3223033  |
| TCRG-V1  | 0.48603392 |
| TCSTV3   | 2.367711   |
| TCTE1    | 0.47061396 |
| TCTEX1D2 | 0.9611621  |
| TCTEX1D4 | 4.314404   |

|         |            |
|---------|------------|
| TCTN2   | 1.2729464  |
| TCTN3   | 1.4335473  |
| TDGF1   | 0.8681078  |
| TDRD3   | 0.80872726 |
| TDRD5   | 0.6236086  |
| TDRD7   | 0.32672596 |
| TEAD1   | 2.3049235  |
| TEAD2   | 1.2939343  |
| TEAD3   | 1.1692545  |
| TEAD4   | 4.1546583  |
| TECPR1  | 1.2489219  |
| TECRL   | 3.3458395  |
| TEK     | 0.8382416  |
| TEKT1   | 7.1225796  |
| TEKT2   | 1.0418382  |
| TEKT4   | 2.6494002  |
| TEN1    | 1.3510718  |
| TENC1   | 1.0329356  |
| TERC    | 1.7224302  |
| TERF2   | 0.5737262  |
| TES     | 3.5759754  |
| TESC    | 1.6465282  |
| TESCL   | 1.7433822  |
| TESK1   | 0.48755932 |
| TESPA1  | 1.8412313  |
| TET2    | 1.1763792  |
| TET3    | 0.40145397 |
| TEX11   | 1.1169448  |
| TEX15   | 1.1365921  |
| TEX26   | 3.2875571  |
| TEX9    | 0.72509694 |
| TFCP2L1 | 0.8971429  |
| TFDP2   | 1.0157995  |
| TFF1    | 1.1002433  |
| TFF2    | 3.958486   |
| TG      | 0.6631839  |
| TGFB1   | 0.4125886  |
| TGFB1I1 | 2.8725834  |
| TGFB2   | 4.083831   |
| TGFB3   | 2.2638679  |
| TGFBI   | 0.3842411  |
| TGFBR1  | 0.7626753  |
| TGFBR2  | 1.3231001  |
| TGFBR3  | 1.6885672  |
| TGIF2   | 1.0661192  |

|          |            |
|----------|------------|
| TGM2     | 1.3597536  |
| THAP2    | 0.96812177 |
| THBD     | 3.183227   |
| THBS1    | 6.1650934  |
| THBS3    | 4.5941486  |
| THBS4    | 1.3332331  |
| THEMIS   | 1.64146    |
| THG1L    | 0.9859779  |
| THOC2    | 0.8881273  |
| THSD4    | 3.741777   |
| THSD7A   | 1.309977   |
| THY1     | 0.95714283 |
| TIA1     | 0.76963735 |
| TIAM1    | 1.4914551  |
| TIAM2    | 2.592005   |
| TICRR    | 0.5961714  |
| TIE1     | 0.6710334  |
| TIFA     | 0.4468813  |
| TIFAB    | 0.9892218  |
| TIGD3    | 0.5770979  |
| TIGIT    | 4.183087   |
| TIMELESS | 2.0811896  |
| TIMP1    | 3.9239988  |
| TIMP2    | 2.7971787  |
| TIMP3    | 5.1865025  |
| TIMP4    | 2.9066992  |
| TINAG    | 4.9603324  |
| TINAGL1  | 2.1370573  |
| TIPARP   | 2.5153494  |
| TJAP1    | 0.4033804  |
| TJP1     | 1.3591251  |
| TJP2     | 1.5839572  |
| TLE1     | 0.55129576 |
| TLE3     | 1.4297347  |
| TLE4     | 0.93212366 |
| TLE6     | 0.2103653  |
| TLK2     | 0.6537514  |
| TLL1     | 0.936085   |
| TLN1     | 0.89700556 |
| TLR13    | 1.1381383  |
| TLR2     | 2.857677   |
| TLR4     | 1.987256   |
| TLR6     | 1.3309684  |
| TLR7     | 0.8350911  |
| TLR8     | 1.8889089  |

|            |            |
|------------|------------|
| TM4SF1     | 3.1538682  |
| TM6SF1     | 1.3347793  |
| TMA16      | 0.38185358 |
| TMC4       | 3.0655327  |
| TMC5       | 2.1552875  |
| TMC7       | 0.6878958  |
| TMCC2      | 2.9454098  |
| TMCC3      | 1.3804555  |
| TMCO3      | 1.116261   |
| TMED8      | 1.616252   |
| TMEFF1     | 3.2418761  |
| TMEFF2     | 0.9023106  |
| TMEM100    | 6.0009303  |
| TMEM107    | 1.4015827  |
| TMEM109    | 0.8487959  |
| TMEM116    | 3.6499949  |
| TMEM117    | 2.4096615  |
| TMEM119    | 1.9957037  |
| TMEM123    | 1.2420688  |
| TMEM128    | 0.39649868 |
| TMEM132A   | 0.83451414 |
| TMEM132C   | 4.780963   |
| TMEM132D   | 3.128102   |
| TMEM136    | 0.66604614 |
| TMEM139    | 1.0552607  |
| TMEM140    | 0.87501717 |
| TMEM154    | 2.6801205  |
| TMEM159    | 2.919394   |
| TMEM164    | 0.7859893  |
| TMEM165    | 1.3047543  |
| TMEM170B   | 0.7770395  |
| TMEM171    | 1.114244   |
| TMEM173    | 1.99653    |
| TMEM178    | 2.5488095  |
| TMEM181A   | 0.8977709  |
| TMEM181B-f | 3.9029617  |
| TMEM184B   | 0.70857334 |
| TMEM189    | 0.23938823 |
| TMEM194B   | 0.71578836 |
| TMEM198    | 0.9583051  |
| TMEM2      | 2.8101468  |
| TMEM200A   | 2.7612064  |
| TMEM202    | 1.0691066  |
| TMEM204    | 1.991899   |
| TMEM212    | 6.5592294  |

|           |            |
|-----------|------------|
| TMEM213   | 5.1920514  |
| TMEM229B  | 0.5556536  |
| TMEM231   | 1.3066568  |
| TMEM232   | 3.9666557  |
| TMEM237   | 1.1373863  |
| TMEM240   | 0.38195205 |
| TMEM245   | 0.64052963 |
| TMEM246   | 3.046719   |
| TMEM252   | 4.1422462  |
| TMEM255A  | 0.25035906 |
| TMEM255B  | 0.68396926 |
| TMEM38A   | 1.0797505  |
| TMEM39A   | 0.8225622  |
| TMEM40    | 2.612873   |
| TMEM44    | 0.4653268  |
| TMEM45A   | 0.33908653 |
| TMEM47    | 0.36332273 |
| TMEM50B   | 2.8451066  |
| TMEM54    | 1.2471704  |
| TMEM59L   | 2.5732894  |
| TMEM61    | 1.4179821  |
| TMEM63A   | 0.5037551  |
| TMEM65    | 0.30730104 |
| TMEM68    | 0.9303231  |
| TMEM74BOS | 0.9235828  |
| TMEM87A   | 2.1364841  |
| TMEM87B   | 0.5429635  |
| TMEM89    | 0.42531753 |
| TMEM95    | 0.40996718 |
| TMEM9B    | 0.24839735 |
| TMF1      | 0.8319936  |
| TMOD1     | 5.094685   |
| TMOD2     | 1.7122338  |
| TMOD3     | 1.171731   |
| TMOD4     | 0.41648293 |
| TMPRSS13  | 4.6395564  |
| TMPRSS4   | 1.2820382  |
| TMSB10    | 1.6402373  |
| TMSB4X    | 0.47602367 |
| TMTC1     | 3.9093733  |
| TMTC3     | 0.3207054  |
| TMX3      | 1.3332357  |
| TNF       | 4.154597   |
| TNFAIP1   | 1.0993814  |
| TNFAIP2   | 1.068944   |

|           |            |
|-----------|------------|
| TNFAIP3   | 4.4558773  |
| TNFAIP6   | 1.5321624  |
| TNFAIP8   | 1.8551064  |
| TNFAIP8L3 | 1.0588682  |
| TNFRSF10B | 2.04219    |
| TNFRSF11A | 0.8791108  |
| TNFRSF12A | 1.0839624  |
| TNFRSF13B | 2.4932504  |
| TNFRSF13C | 2.3890948  |
| TNFRSF14  | 0.19472146 |
| TNFRSF18  | 1.8865471  |
| TNFRSF1B  | 1.2936821  |
| TNFRSF21  | 1.1518412  |
| TNFRSF25  | 1.9870076  |
| TNFRSF26  | 2.328202   |
| TNFRSF4   | 1.2138343  |
| TNFSF10   | 2.2230396  |
| TNFSF13B  | 3.1026287  |
| TNFSF14   | 2.7104964  |
| TNFSF15   | 3.6604176  |
| TNFSF8    | 0.5036111  |
| TNFSF9    | 4.6423254  |
| TNIK      | 1.6222076  |
| TNIP1     | 3.1344032  |
| TNIP2     | 1.4241738  |
| TNIP3     | 2.5172367  |
| TNK1      | 4.9126444  |
| TNKS      | 1.0502257  |
| TNKS1BP1  | 0.15113735 |
| TNN       | 4.314877   |
| TNNC1     | 0.9293566  |
| TNNC2     | 1.2399313  |
| TNNI2     | 2.3129902  |
| TNNI3     | 3.7017941  |
| TNNI3K    | 0.76037383 |
| TNNT2     | 6.3853526  |
| TNNT3     | 0.72787905 |
| TNP2      | 0.7026701  |
| TNRC18    | 0.3408203  |
| TNRC6B    | 0.3567276  |
| TNRC6C    | 0.5236125  |
| TNS1      | 2.4283252  |
| TNS3      | 0.7460346  |
| TNXB      | 0.7817874  |
| TOP1      | 0.2500658  |

|          |            |
|----------|------------|
| TOP2A    | 0.7056675  |
| TOP2B    | 0.3293004  |
| TOPBP1   | 0.32283497 |
| TOR3A    | 0.47759438 |
| TOR4A    | 0.21342039 |
| TOX2     | 2.2211022  |
| TOX3     | 2.930881   |
| TOX4     | 0.43641758 |
| TPBG     | 2.7179816  |
| TPD52    | 1.92029    |
| TPM2     | 2.4467049  |
| TPM3     | 1.2254968  |
| TPM4     | 2.6549535  |
| TPPP3    | 4.550817   |
| TPR      | 1.1058807  |
| TPSB2    | 0.93820524 |
| TRA2A    | 2.0227232  |
| TRABD2B  | 3.49826    |
| TRAF1    | 4.6009507  |
| TRAF2    | 0.50108004 |
| TRAF3    | 0.8752098  |
| TRAF3IP1 | 0.5405514  |
| TRAF3IP2 | 0.97934675 |
| TRAF3IP3 | 0.5061841  |
| TRAF5    | 0.4096074  |
| TRAF6    | 0.8738661  |
| TRAF7    | 0.7204137  |
| TRAK2    | 1.7001991  |
| TRAPPC2  | 0.26014376 |
| TRAPPC8  | 0.5165787  |
| TRAT1    | 1.6643724  |
| TRAV3N-3 | 1.6482549  |
| TRAV6-3  | 0.75567293 |
| TRAV9D-3 | 0.858042   |
| TRCG1    | 1.0846834  |
| TRDMT1   | 0.17084932 |
| TRDN     | 0.4494996  |
| TREM1    | 3.1872253  |
| TREM2    | 1.9634843  |
| TREM3    | 4.5605516  |
| TREML1   | 2.3321967  |
| TREML2   | 2.0864139  |
| TRERF1   | 1.9201155  |
| TREX1    | 2.1007166  |
| TRIB1    | 0.95517683 |

|          |            |
|----------|------------|
| TRIB2    | 3.3535886  |
| TRIL     | 0.69431806 |
| TRIM10   | 1.4577606  |
| TRIM12A  | 0.6018591  |
| TRIM12C  | 1.3988643  |
| TRIM13   | 0.8088651  |
| TRIM16   | 4.063008   |
| TRIM21   | 0.8812394  |
| TRIM29   | 3.3676856  |
| TRIM3    | 1.6852713  |
| TRIM30A  | 2.0373683  |
| TRIM30B  | 4.1623464  |
| TRIM30C  | 0.88706565 |
| TRIM30D  | 2.3668098  |
| TRIM33   | 1.0797668  |
| TRIM34A  | 1.0801048  |
| TRIM34B  | 1.1593795  |
| TRIM35   | 1.6046567  |
| TRIM36   | 1.6667936  |
| TRIM39   | 0.60286474 |
| TRIM43B  | 0.3726158  |
| TRIM44   | 0.69955826 |
| TRIM46   | 0.9923806  |
| TRIM47   | 0.8116894  |
| TRIM5    | 0.67601895 |
| TRIM54   | 2.1698213  |
| TRIM56   | 1.9326744  |
| TRIM59   | 1.2265773  |
| TRIM62   | 1.2918224  |
| TRIM63   | 1.9941914  |
| TRIM69   | 3.0926437  |
| TRIM72   | 0.79001975 |
| TRIM8    | 0.4846506  |
| TRIO     | 0.86738014 |
| TRIP10   | 1.6527162  |
| TRIP11   | 0.9577851  |
| TRIQK    | 0.72382736 |
| TRMT44   | 0.8797991  |
| TRNP1    | 3.5811481  |
| TRO      | 1.122282   |
| TROVE2   | 1.9711933  |
| TRP53BP1 | 0.94295645 |
| TRP53BP2 | 1.0526807  |
| TRP53I11 | 1.362237   |
| TRP53I13 | 0.27623796 |



|          |            |
|----------|------------|
| TRP73    | 0.8924594  |
| TRPC1    | 1.748606   |
| TRPC3    | 0.30252934 |
| TRPC6    | 4.68521    |
| TRPM1    | 1.0173855  |
| TRPM6    | 3.1549     |
| TRPS1    | 3.091114   |
| TRPV2    | 1.2859864  |
| TRPV4    | 1.6566291  |
| TRPV6    | 3.279622   |
| TSC22D1  | 1.1755009  |
| TSC22D3  | 1.0537877  |
| TSGA10   | 1.9185057  |
| TSHB     | 3.556679   |
| TSHZ1    | 0.46165085 |
| TSHZ3    | 1.9751458  |
| TSLP     | 4.0877614  |
| TSNAXIP1 | 2.5849864  |
| TSPAN1   | 9.154874   |
| TSPAN11  | 5.176068   |
| TSPAN13  | 3.137405   |
| TSPAN15  | 1.0520039  |
| TSPAN17  | 0.64072704 |
| TSPAN18  | 1.7828813  |
| TSPAN2   | 4.9774375  |
| TSPAN3   | 1.4006844  |
| TSPAN32  | 0.93928814 |
| TSPAN5   | 3.72505    |
| TSPAN6   | 2.481872   |
| TSPAN7   | 0.94634247 |
| TSPAN8   | 6.632371   |
| TSPO     | 0.3884368  |
| TSPO2    | 0.6097374  |
| TSPYL2   | 0.41340637 |
| TSPYL3   | 1.5656252  |
| TSPYL4   | 1.7996087  |
| TSR1     | 0.3070612  |
| TSR2     | 0.8313894  |
| TSSK4    | 1.4161129  |
| TTBK2    | 1.5038009  |
| TTC12    | 2.6927972  |
| TTC14    | 0.63288116 |
| TTC16    | 1.2809095  |
| TTC18    | 4.3728228  |
| TTC21A   | 3.4908288  |

|          |            |
|----------|------------|
| TTC25    | 1.3181846  |
| TTC26    | 0.9521854  |
| TTC28    | 1.0403533  |
| TTC29    | 3.8515406  |
| TTC34    | 4.1179833  |
| TTC5     | 0.34629583 |
| TTC8     | 0.2323196  |
| TTC9     | 1.4178579  |
| TTL      | 0.7255807  |
| TLL11    | 0.6486993  |
| TLL3     | 2.3683734  |
| TLL6     | 3.8124833  |
| TLL7     | 4.6337233  |
| TLL9     | 2.340083   |
| TTN      | 2.420743   |
| TTPAL    | 0.94708824 |
| TUBA1A   | 3.9226155  |
| TUBA1B   | 0.21810818 |
| TUBA8    | 0.8262625  |
| TUBAL3   | 0.5784235  |
| TUBA-RS1 | 0.96415496 |
| TUBB1    | 1.1339264  |
| TUBB2B   | 3.081156   |
| TUBB4A   | 0.53636837 |
| TUBB6    | 1.0350103  |
| TUBG2    | 1.3028185  |
| TUBGCP3  | 0.71504354 |
| TUBGCP5  | 1.0066595  |
| TUFT1    | 0.65849686 |
| TULP3    | 1.3250475  |
| TULP4    | 0.96499586 |
| TUSC3    | 0.3919735  |
| TUSC5    | 3.0103045  |
| TWF2     | 0.4632902  |
| TWIST2   | 2.1706924  |
| TXK      | 1.896122   |
| TXLNB    | 4.3855815  |
| TXNIP    | 1.4763746  |
| TXNRD3   | 1.8239827  |
| TYMS     | 0.8654821  |
| TYRO3    | 2.0212946  |
| TYROBP   | 0.7859931  |
| TYW3     | 1.0610425  |
| UACA     | 1.0288591  |
| UBA2     | 0.34572268 |

|          |            |
|----------|------------|
| UBA6     | 0.5305574  |
| UBALD2   | 0.51521444 |
| UBASH3A  | 0.38602543 |
| UBASH3B  | 1.7325473  |
| UBD      | 0.63221073 |
| UBE2B    | 0.33326006 |
| UBE2H    | 0.9398055  |
| UBE2O    | 0.3642192  |
| UBE2Q2   | 1.0127988  |
| UBE2S    | 0.41666603 |
| UBE3A    | 0.17265368 |
| UBE4BOS1 | 1.2925336  |
| UBN1     | 1.6578798  |
| UBN2     | 0.53465176 |
| UBP1     | 1.1296067  |
| UBR1     | 0.27118254 |
| UBTD2    | 2.2658105  |
| UBXN10   | 4.1617227  |
| UBXN11   | 2.2264094  |
| UBXN2A   | 1.0501609  |
| UBXN2B   | 0.29883814 |
| UBXN7    | 0.8284116  |
| UCHL1    | 1.4487491  |
| UCK2     | 0.24317694 |
| UCMA     | 0.29088068 |
| UCP2     | 1.214561   |
| UCP3     | 1.125082   |
| UGCG     | 1.0527034  |
| UGGT2    | 0.4547763  |
| UGT2A1   | 3.808165   |
| UGT8A    | 0.71158147 |
| UIMC1    | 2.386856   |
| ULBP1    | 0.8246021  |
| ULK4     | 1.1661949  |
| UNC13B   | 2.5554042  |
| UNC13D   | 1.4943843  |
| UNC45B   | 2.4433541  |
| UNC5B    | 0.70601845 |
| UNC5C    | 2.0210636  |
| UNC5CL   | 0.9650426  |
| UNC79    | 0.711365   |
| UNK      | 0.43124628 |
| UPF3A    | 0.44335985 |
| UPF3B    | 0.32796526 |
| UPK1A    | 0.6550002  |

|        |            |
|--------|------------|
| UPK1B  | 2.6349816  |
| UPK2   | 2.8604684  |
| UPK3B  | 1.9670577  |
| UPP1   | 4.2978454  |
| URB2   | 1.9472208  |
| USP11  | 1.4233341  |
| USP13  | 1.5524483  |
| USP16  | 0.6886034  |
| USP25  | 0.56993484 |
| USP31  | 0.9239106  |
| USP32  | 0.85949135 |
| USP33  | 0.17584562 |
| USP34  | 1.8641596  |
| USP36  | 0.48234987 |
| USP37  | 1.6080527  |
| USP42  | 0.49129105 |
| USP43  | 1.683399   |
| USP47  | 1.1002226  |
| USP48  | 0.35771036 |
| USP49  | 0.9913552  |
| USP53  | 2.0854068  |
| USP54  | 2.0894997  |
| USP6NL | 2.7465405  |
| USP9X  | 0.9459748  |
| USPL1  | 0.2663045  |
| UTF1   | 2.9052346  |
| UTP14A | 1.9704123  |
| UTP23  | 0.29088402 |
| UTRN   | 2.1376715  |
| VAMP2  | 0.31387138 |
| VAMP3  | 0.87422085 |
| VAMP5  | 1.2092242  |
| VAPA   | 0.2886138  |
| VASP   | 2.232502   |
| VAT1L  | 0.5220885  |
| VAV1   | 1.5279889  |
| VAV3   | 0.76574135 |
| VBP1   | 0.59302473 |
| VCAM1  | 2.0893917  |
| VCAN   | 2.2729168  |
| VCL    | 1.7388096  |
| VDR    | 1.9833951  |
| VEGFA  | 1.8181062  |
| VEPH1  | 3.5878756  |
| VEZF1  | 1.2652435  |

|          |            |
|----------|------------|
| VGf      | 3.5514724  |
| VGLL3    | 1.314153   |
| VGLL4    | 1.9530411  |
| VIM      | 1.026227   |
| VIPR2    | 4.343624   |
| VIT      | 1.9828956  |
| VLDLR    | 0.6517935  |
| VMN1R168 | 0.6899779  |
| VMN1R59  | 1.3101676  |
| VMN1R87  | 1.807327   |
| VMN2R11  | 1.7988095  |
| VMN2R88  | 0.3501196  |
| VOPP1    | 0.9522991  |
| VPRBP    | 0.37190723 |
| VPREB3   | 2.459958   |
| VPS13A   | 1.1116624  |
| VPS13B   | 0.23264647 |
| VPS36    | 0.4123292  |
| VPS37C   | 0.4210024  |
| VPS51    | 0.72877645 |
| VPS53    | 0.3719306  |
| VPS54    | 0.61228895 |
| VRK1     | 0.996953   |
| VSIG10   | 0.89715576 |
| VSIG2    | 4.258417   |
| VSIG8    | 1.8672919  |
| VSNL1    | 1.7313766  |
| VSTM2A   | 0.25268006 |
| VSTM4    | 2.3926547  |
| VWA1     | 1.0229335  |
| VWA3A    | 4.986      |
| VWA5A    | 0.583302   |
| VWF      | 3.0755148  |
| WAC      | 0.43700886 |
| WARS     | 1.8065801  |
| WARS2    | 1.022752   |
| WAS      | 0.93779945 |
| WASF2    | 2.0184069  |
| WASF3    | 0.33949614 |
| WBP5     | 1.5863547  |
| WDFY3    | 0.46106052 |
| WDFY4    | 1.1748829  |
| WDPCP    | 0.5197091  |
| WDR1     | 0.99483776 |
| WDR16    | 5.616757   |

|         |            |
|---------|------------|
| WDR35   | 1.1166754  |
| WDR37   | 0.44781303 |
| WDR38   | 0.87470007 |
| WDR44   | 1.1150658  |
| WDR45B  | 0.71865606 |
| WDR47   | 3.1246214  |
| WDR52   | 1.6115658  |
| WDR54   | 1.5742528  |
| WDR5B   | 3.3996077  |
| WDR60   | 0.5850072  |
| WDR63   | 2.964829   |
| WDR65   | 4.4120593  |
| WDR66   | 3.9750838  |
| WDR75   | 0.42498064 |
| WDR78   | 3.52534    |
| WDR92   | 1.5289135  |
| WDR95   | 2.5499752  |
| WDR96   | 3.284258   |
| WDSUB1  | 0.72487354 |
| WFDC10  | 2.4367394  |
| WFDC17  | 1.368125   |
| WFDC18  | 2.3359914  |
| WFDC2   | 4.5282264  |
| WFDC6A  | 1.5250266  |
| WFDC6B  | 1.9957728  |
| WFIKKN2 | 0.40281534 |
| WHRN    | 4.1511965  |
| WHSC1   | 0.84028864 |
| WHSC1L1 | 1.0849214  |
| WIF1    | 5.8204136  |
| WIPF1   | 1.6158018  |
| WIPF2   | 0.62664795 |
| WISP2   | 0.83198786 |
| WIZ     | 0.32597113 |
| WLS     | 2.1195416  |
| WNK1    | 1.4231825  |
| WNT10B  | 2.5398145  |
| WNT11   | 1.9176054  |
| WNT16   | 0.98985386 |
| WNT4    | 0.93807125 |
| WNT6    | 2.563294   |
| WNT7A   | 1.3782675  |
| WNT9A   | 1.6846092  |
| WRN     | 0.34397125 |
| WSB1    | 1.5786757  |

|         |            |
|---------|------------|
| WSCD2   | 1.7861841  |
| WT1     | 2.648263   |
| WTAP    | 0.1634016  |
| WTIP    | 0.870605   |
| WWC1    | 0.70802116 |
| WWC2    | 1.4812317  |
| WWTR1   | 1.8190026  |
| XAF1    | 0.95240974 |
| XCL1    | 1.8451285  |
| XDH     | 1.1875677  |
| XIRP1   | 0.59309864 |
| XKRX    | 1.1998839  |
| XLR3B   | 0.8977299  |
| XLR4A   | 2.1447792  |
| XLR4B   | 2.3407407  |
| XPNPEP2 | 3.702274   |
| XPO1    | 0.21911287 |
| XPO4    | 0.4383943  |
| XRN1    | 2.2260218  |
| XRRA1   | 0.3663683  |
| XXYLT1  | 1.3180768  |
| XYLT1   | 0.5575268  |
| YAP1    | 0.16205835 |
| YBX2    | 0.40255666 |
| YBX3    | 0.22683477 |
| YDJC    | 0.8676472  |
| YEATS4  | 4.115302   |
| YIPF7   | 0.60659695 |
| YTHDC1  | 0.6176038  |
| YWHAH   | 0.7903938  |
| YWHAZ   | 1.1863718  |
| YY1     | 0.27055454 |
| YY2     | 1.6679506  |
| ZAK     | 2.565467   |
| ZAP70   | 0.32262135 |
| ZBED3   | 2.0112314  |
| ZBED4   | 0.6542177  |
| ZBED6   | 1.1515307  |
| ZBTB10  | 1.6529374  |
| ZBTB11  | 0.68724585 |
| ZBTB12  | 0.35224438 |
| ZBTB16  | 2.6423426  |
| ZBTB2   | 0.7953658  |
| ZBTB21  | 1.0601594  |
| ZBTB24  | 0.7748885  |

|         |            |
|---------|------------|
| ZBTB25  | 0.3715372  |
| ZBTB26  | 1.8092062  |
| ZBTB3   | 0.31648517 |
| ZBTB32  | 2.9599538  |
| ZBTB34  | 0.7417326  |
| ZBTB37  | 0.8998451  |
| ZBTB38  | 0.21157336 |
| ZBTB4   | 0.7272029  |
| ZBTB41  | 0.9709635  |
| ZBTB46  | 1.4746633  |
| ZBTB6   | 2.1079783  |
| ZBTB7A  | 0.5175357  |
| ZBTB8B  | 1.2163749  |
| ZC2HC1A | 2.3399882  |
| ZC3H10  | 0.2305212  |
| ZC3H11A | 0.4365039  |
| ZC3H12A | 3.0031688  |
| ZC3H12C | 1.3727431  |
| ZC3H12D | 0.6878543  |
| ZC3H13  | 1.6782985  |
| ZC3H3   | 0.7113695  |
| ZC3H4   | 0.28298473 |
| ZC3H6   | 0.43163443 |
| ZC3H7A  | 0.59270144 |
| ZC3HAV1 | 0.49736786 |
| ZCCHC10 | 0.256433   |
| ZCCHC11 | 0.74667215 |
| ZCCHC12 | 1.4571319  |
| ZCCHC18 | 1.1533427  |
| ZCCHC3  | 1.5725098  |
| ZCCHC7  | 0.5957804  |
| ZCCHC8  | 0.59700155 |
| ZDHHC1  | 2.0093088  |
| ZDHHC17 | 1.0458484  |
| ZDHHC18 | 0.5867281  |
| ZDHHC2  | 0.2929635  |
| ZDHHC21 | 0.7285366  |
| ZDHHC22 | 1.5352554  |
| ZDHHC23 | 1.2266855  |
| ZDHHC3  | 0.8378954  |
| ZEB1    | 1.9909463  |
| ZEB2    | 1.107501   |
| ZEB2OS  | 0.90593266 |
| ZFAND2A | 0.4003048  |
| ZFAND5  | 0.2335887  |



|         |            |
|---------|------------|
| ZFAND6  | 0.505764   |
| ZFHX3   | 0.30852485 |
| ZFML    | 0.8010726  |
| ZFP1    | 1.2553053  |
| ZFP101  | 0.9161968  |
| ZFP105  | 1.3975992  |
| ZFP106  | 0.3649006  |
| ZFP11   | 0.6686499  |
| ZFP111  | 0.34726214 |
| ZFP12   | 0.70146036 |
| ZFP120  | 0.5590906  |
| ZFP131  | 1.1366663  |
| ZFP142  | 1.2512429  |
| ZFP143  | 0.7868061  |
| ZFP146  | 1.0384555  |
| ZFP160  | 0.2465744  |
| ZFP180  | 0.47305822 |
| ZFP182  | 1.5519278  |
| ZFP184  | 1.1164224  |
| ZFP185  | 3.5444038  |
| ZFP212  | 0.51887655 |
| ZFP217  | 0.988595   |
| ZFP235  | 0.16667295 |
| ZFP236  | 1.2412071  |
| ZFP248  | 1.1746681  |
| ZFP251  | 1.3658128  |
| ZFP26   | 1.611006   |
| ZFP260  | 0.3345027  |
| ZFP263  | 0.5566368  |
| ZFP28   | 0.4037671  |
| ZFP280D | 1.1413522  |
| ZFP281  | 0.8686204  |
| ZFP286  | 0.9607146  |
| ZFP287  | 2.0005429  |
| ZFP292  | 0.6438279  |
| ZFP296  | 0.7170892  |
| ZFP317  | 1.5490162  |
| ZFP322A | 0.43078423 |
| ZFP329  | 0.76267004 |
| ZFP341  | 0.33162785 |
| ZFP352  | 3.3537467  |
| ZFP354C | 1.2025154  |
| ZFP36   | 2.0840645  |
| ZFP365  | 4.414535   |
| ZFP366  | 2.8781834  |

|         |            |
|---------|------------|
| ZFP36L1 | 0.36052036 |
| ZFP36L3 | 0.5418632  |
| ZFP37   | 0.39791036 |
| ZFP382  | 1.1785305  |
| ZFP384  | 0.6171503  |
| ZFP397  | 1.4578094  |
| ZFP40   | 0.27645612 |
| ZFP407  | 0.41711378 |
| ZFP418  | 0.19027233 |
| ZFP426  | 0.3074503  |
| ZFP429  | 1.3824034  |
| ZFP433  | 0.20397282 |
| ZFP438  | 0.151093   |
| ZFP445  | 1.5299706  |
| ZFP446  | 0.34839463 |
| ZFP449  | 0.79825926 |
| ZFP451  | 0.6487403  |
| ZFP456  | 2.3604567  |
| ZFP458  | 0.5562544  |
| ZFP46   | 4.009107   |
| ZFP462  | 2.3526726  |
| ZFP473  | 1.3220651  |
| ZFP474  | 4.4476647  |
| ZFP503  | 1.1689601  |
| ZFP51   | 1.1695228  |
| ZFP512  | 0.4478197  |
| ZFP513  | 0.24955606 |
| ZFP516  | 0.18695164 |
| ZFP518A | 0.5293181  |
| ZFP518B | 0.74073267 |
| ZFP52   | 3.0857625  |
| ZFP521  | 0.87292075 |
| ZFP53   | 1.4788926  |
| ZFP532  | 0.9916978  |
| ZFP536  | 1.0975051  |
| ZFP560  | 1.4605131  |
| ZFP566  | 0.57013845 |
| ZFP568  | 0.9399719  |
| ZFP579  | 0.44793653 |
| ZFP58   | 0.7783487  |
| ZFP580  | 0.26668596 |
| ZFP583  | 2.4099696  |
| ZFP592  | 0.3091488  |
| ZFP593  | 1.1098957  |
| ZFP595  | 1.0511389  |

|        |            |
|--------|------------|
| ZFP597 | 1.3969178  |
| ZFP605 | 1.0090601  |
| ZFP607 | 0.93396854 |
| ZFP608 | 1.8584352  |
| ZFP61  | 2.0552244  |
| ZFP62  | 1.7486863  |
| ZFP626 | 1.553318   |
| ZFP641 | 1.6420646  |
| ZFP644 | 0.32832384 |
| ZFP651 | 0.9825597  |
| ZFP654 | 0.316077   |
| ZFP664 | 1.1936636  |
| ZFP677 | 1.5236187  |
| ZFP68  | 0.47885323 |
| ZFP687 | 0.3897009  |
| ZFP69  | 0.24833798 |
| ZFP697 | 5.2287717  |
| ZFP7   | 1.414443   |
| ZFP703 | 0.8174405  |
| ZFP704 | 0.71762276 |
| ZFP708 | 1.0958657  |
| ZFP709 | 0.5572684  |
| ZFP711 | 1.8869834  |
| ZFP712 | 1.4236851  |
| ZFP715 | 0.5460849  |
| ZFP719 | 1.6984959  |
| ZFP74  | 0.75447536 |
| ZFP740 | 1.1607332  |
| ZFP747 | 0.8645687  |
| ZFP748 | 0.18721962 |
| ZFP758 | 1.5987353  |
| ZFP764 | 0.65588856 |
| ZFP78  | 0.32893205 |
| ZFP781 | 0.95095825 |
| ZFP783 | 0.8309672  |
| ZFP790 | 2.6633348  |
| ZFP800 | 0.21431446 |
| ZFP809 | 1.1168814  |
| ZFP81  | 0.28557944 |
| ZFP819 | 1.1517451  |
| ZFP82  | 0.77585554 |
| ZFP821 | 0.6410432  |
| ZFP830 | 0.64364576 |
| ZFP839 | 1.2533894  |
| ZFP84  | 1.0105953  |

|          |            |
|----------|------------|
| ZFP850   | 2.106249   |
| ZFP865   | 0.39179277 |
| ZFP866   | 0.22863531 |
| ZFP868   | 0.5536132  |
| ZFP871   | 0.46313667 |
| ZFP882   | 0.32068038 |
| ZFP9     | 1.244751   |
| ZFP933   | 0.60390186 |
| ZFP935   | 0.79179764 |
| ZFP937   | 0.42535257 |
| ZFP945   | 0.7184341  |
| ZFP948   | 0.9109535  |
| ZFP950   | 0.26584268 |
| ZFP959   | 0.3483119  |
| ZFPM2    | 1.0799136  |
| ZFR2     | 1.654006   |
| ZFX      | 0.5445018  |
| ZFYVE16  | 1.1904354  |
| ZFYVE20  | 0.29772043 |
| ZHX2     | 2.4376826  |
| ZKSCAN6  | 0.55514383 |
| ZMIZ1    | 1.7449102  |
| ZMIZ1OS1 | 1.1361814  |
| ZMYM2    | 0.58661747 |
| ZMYM6    | 0.5174804  |
| ZMYND10  | 2.3556042  |
| ZMYND11  | 0.79998493 |
| ZMYND12  | 3.315847   |
| ZMYND15  | 1.2882767  |
| ZNFX1    | 0.58063745 |
| ZNRF1    | 1.1653929  |
| ZPBP     | 0.6328945  |
| ZPBP2    | 0.8774822  |
| ZRANB2   | 0.44188786 |
| ZRSR2    | 0.36040807 |
| ZSCAN18  | 2.2817876  |
| ZSCAN25  | 1.231415   |
| ZSCAN26  | 0.37097788 |
| ZSWIM4   | 0.35605764 |
| ZSWIM6   | 1.8225579  |
| ZSWIM8   | 0.3056178  |
| ZUFSP    | 1.0240841  |
| ZXDB     | 1.635345   |
| ZYG11B   | 0.515048   |
| ZYX      | 0.9059329  |

ZZZ3

0.22992706

**Mice\_onset\_lung\_DEgenes\_fc****Gene**            **log2Fold change**

|          |            |
|----------|------------|
| A1BG     | -8.555922  |
| A1CF     | -7.6254063 |
| A3GALT2  | -0.2799187 |
| AAAS     | -1.6664977 |
| AACS     | -2.1116657 |
| AADAC    | -7.7075458 |
| AADAT    | -2.6743624 |
| AAED1    | -1.8474431 |
| AAGAB    | -1.3348379 |
| AAMDC    | -2.5179508 |
| AAMP     | -1.468214  |
| AANAT    | -1.2355244 |
| AAR2     | -0.9762707 |
| AARD     | -3.0766273 |
| AARS     | -1.4256396 |
| AARS2    | -1.7737565 |
| AARSD1   | -1.258482  |
| AASDH    | -1.3080292 |
| AASDHPPT | -1.3125496 |
| AASS     | -3.867856  |
| AATF     | -0.9698491 |
| ABAT     | -6.4116955 |
| ABCA1    | -0.2321267 |
| ABCA14   | -2.7692475 |
| ABCA2    | -2.934729  |
| ABCA3    | -0.9189444 |
| ABCA6    | -6.6305137 |
| ABCA8A   | -3.8970582 |
| ABCA8B   | -4.5464764 |
| ABCA9    | -2.473921  |
| ABCB10   | -1.2065191 |
| ABCB11   | -10.187672 |
| ABCB1A   | -1.4446754 |
| ABCB4    | -5.5032535 |
| ABCB6    | -3.8805103 |
| ABCB7    | -1.7380159 |
| ABCB8    | -1.611412  |
| ABCB9    | -0.4564633 |
| ABCC10   | -1.3413429 |
| ABCC12   | -2.2126508 |
| ABCC2    | -5.65816   |
| ABCC3    | -2.5171819 |
| ABCC6    | -6.879424  |

|         |            |
|---------|------------|
| ABCC9   | -2.155455  |
| ABCD1   | -1.8868787 |
| ABCD2   | -4.2326984 |
| ABCD3   | -3.1256924 |
| ABCD4   | -2.0953732 |
| ABCF2   | -0.444551  |
| ABCF3   | -0.9076738 |
| ABCG2   | -2.627481  |
| ABCG3   | -1.6754773 |
| ABCG5   | -6.6328917 |
| ABCG8   | -6.862006  |
| ABHD1   | -4.231255  |
| ABHD11  | -1.6371179 |
| ABHD12  | -0.6547356 |
| ABHD14A | -1.661017  |
| ABHD14B | -4.6504602 |
| ABHD15  | -3.727269  |
| ABHD16A | -1.3020205 |
| ABHD16B | -0.9186652 |
| ABHD17A | -2.2746234 |
| ABHD17C | -0.416182  |
| ABHD2   | -1.4694963 |
| ABHD4   | -0.6158032 |
| ABHD6   | -3.6850834 |
| ABHD8   | -0.9362321 |
| ABI3    | -0.6866827 |
| ABL1    | -0.2346706 |
| ABLIM3  | -0.2751126 |
| ABT1    | -1.1732249 |
| ABTB1   | -0.9822631 |
| ABTB2   | -0.564425  |
| ACAA1A  | -2.1706772 |
| ACAA1B  | -6.0395513 |
| ACAA2   | -4.339718  |
| ACACA   | -2.1160693 |
| ACACB   | -5.027814  |
| ACAD10  | -3.1772065 |
| ACAD11  | -4.5970674 |
| ACAD12  | -2.785326  |
| ACAD8   | -1.5686302 |
| ACAD9   | -1.5042319 |
| ACADL   | -1.594039  |
| ACADM   | -3.6717138 |
| ACADS   | -5.3146524 |
| ACADSB  | -0.9649854 |

|        |            |
|--------|------------|
| ACADVL | -2.9657621 |
| ACAT1  | -3.3149633 |
| ACAT2  | -4.0307207 |
| ACAT3  | -3.8942838 |
| ACBD4  | -2.6162724 |
| ACBD5  | -2.189314  |
| ACBD6  | -2.3589697 |
| ACCS   | -1.3226843 |
| ACCSL  | -1.0861061 |
| ACD    | -0.4623785 |
| ACKR4  | -3.096647  |
| ACLY   | -2.878932  |
| ACMSD  | -6.117151  |
| ACN9   | -2.1028998 |
| ACNAT1 | -6.587571  |
| ACNAT2 | -6.3030024 |
| ACO1   | -3.242205  |
| ACO2   | -1.4263191 |
| ACOT1  | -1.0826883 |
| ACOT12 | -5.8785934 |
| ACOT13 | -2.9656878 |
| ACOT2  | -0.3844845 |
| ACOT3  | -7.4303207 |
| ACOT4  | -6.546307  |
| ACOT5  | -2.0418491 |
| ACOT6  | -2.4525168 |
| ACOT8  | -2.0821824 |
| ACOX1  | -4.019051  |
| ACOX2  | -4.4164243 |
| ACP1   | -1.5336008 |
| ACP2   | -1.5655866 |
| ACP5   | -1.1133575 |
| ACP6   | -2.7876892 |
| ACPT   | -2.871922  |
| ACRBP  | -0.4511418 |
| ACSBG2 | -1.786551  |
| ACSF2  | -0.7793484 |
| ACSF3  | -2.6069908 |
| ACSL1  | -4.3162003 |
| ACSL3  | -1.5159237 |
| ACSL5  | -2.9592724 |
| ACSL6  | -1.8572922 |
| ACSM1  | -3.92912   |
| ACSM3  | -5.950413  |
| ACSM4  | -1.5836663 |



|          |            |
|----------|------------|
| ACSM5    | -8.168505  |
| ACSS2    | -6.1021447 |
| ACSS3    | -3.0857046 |
| ACTL10   | -3.024538  |
| ACTL6A   | -0.8389821 |
| ACTL7B   | -1.0034552 |
| ACTL9    | -3.391691  |
| ACTN4    | -0.1521897 |
| ACTR1B   | -0.8274331 |
| ACTR2    | -0.470305  |
| ACTR5    | -0.5125165 |
| ACTR6    | -2.1017423 |
| ACTR8    | -1.2179251 |
| ACTRT2   | -1.2049823 |
| ACTRT3   | -1.6123352 |
| ACVR1C   | -1.2700176 |
| ACVR2A   | -0.6465271 |
| ACVR2B   | -0.4271488 |
| ACY1     | -4.70238   |
| ACY3     | -5.682586  |
| ACYP2    | -2.1554658 |
| ADAD1    | -1.5752504 |
| ADAL     | -1.8933201 |
| ADAM11   | -1.1304343 |
| ADAM12   | -1.2257264 |
| ADAM18   | -1.6936994 |
| ADAM1B   | -1.6158657 |
| ADAM21   | -0.5230851 |
| ADAM23   | -3.2528088 |
| ADAM25   | -1.6769786 |
| ADAM26A  | -1.4108162 |
| ADAM3    | -1.4528935 |
| ADAM32   | -2.2009633 |
| ADAM33   | -0.6087005 |
| ADAM4    | -1.4095278 |
| ADAM6A   | -1.0625644 |
| ADAMDEC1 | -2.2812152 |
| ADAMTS12 | -0.549614  |
| ADAMTS13 | -3.9604404 |
| ADAMTS14 | -1.0639181 |
| ADAMTS16 | -2.348313  |
| ADAMTS19 | -1.1028862 |
| ADAMTS20 | -3.5307355 |
| ADAMTS7  | -4.3085527 |
| ADAMTSL1 | -0.3175988 |

|         |            |
|---------|------------|
| ADAP2   | -0.3276    |
| ADARB2  | -1.9483664 |
| ADAT2   | -0.63167   |
| ADCK1   | -1.8586388 |
| ADCK2   | -1.681809  |
| ADCK3   | -5.682584  |
| ADCK4   | -0.3791122 |
| ADCK5   | -2.304397  |
| ADCY10  | -1.2494087 |
| ADCY6   | -0.9624    |
| ADCY9   | -1.8957057 |
| ADCYAP1 | -2.2109778 |
| ADGB    | -1.4551632 |
| ADH1    | -7.6763725 |
| ADH4    | -6.621848  |
| ADH5    | -3.3281834 |
| ADH7    | -1.0349724 |
| ADHFE1  | -3.4373112 |
| ADI1    | -3.202608  |
| ADIPOR1 | -0.7945027 |
| ADIPOR2 | -1.8959622 |
| ADK     | -3.5222712 |
| ADNP    | -0.2864304 |
| ADO     | -0.9428406 |
| ADORA1  | -1.7042208 |
| ADPGK   | -0.8235269 |
| ADPRHL2 | -1.8534865 |
| ADPRM   | -0.4571252 |
| ADRA1A  | -1.7865486 |
| ADRA1B  | -2.9773917 |
| ADRA1D  | -0.6498163 |
| ADRA2B  | -2.9141362 |
| ADRA2C  | -1.6764266 |
| ADRB3   | -1.4371495 |
| ADRM1   | -1.2248697 |
| ADSL    | -0.5392051 |
| ADSS    | -0.3009353 |
| ADSSL1  | -1.0731897 |
| ADTRP   | -4.8724384 |
| AEN     | -0.1745877 |
| AES     | -1.3096895 |
| AFG3L1  | -1.7193265 |
| AFG3L2  | -1.7627358 |
| AFM     | -6.88386   |
| AFMID   | -6.7435923 |

|        |            |
|--------|------------|
| AFP    | -1.5251589 |
| AGA    | -1.2172422 |
| AGBL1  | -1.6709547 |
| AGBL3  | -0.7518246 |
| AGBL4  | -0.4817548 |
| AGFG2  | -1.1921401 |
| AGK    | -0.6650796 |
| AGL    | -1.6868067 |
| AGMAT  | -7.3332553 |
| AGMO   | -4.1731505 |
| AGO1   | -0.7911201 |
| AGPAT2 | -4.3433333 |
| AGPAT3 | -2.1556973 |
| AGPAT6 | -1.8741632 |
| AGPAT9 | -1.3018503 |
| AGT    | -4.9034066 |
| AGTR1A | -4.0434175 |
| AGTR1B | -1.636785  |
| AGTR2  | -1.9234667 |
| AGXT   | -6.8663487 |
| AGXT2  | -5.1643004 |
| AHCTF1 | -0.6932993 |
| AHCY   | -4.1074724 |
| AHCYL1 | -1.004046  |
| AHDC1  | -0.3345413 |
| AHR    | -1.2097411 |
| AHRR   | -1.8032601 |
| AHSA1  | -0.804884  |
| AHSG   | -2.5738506 |
| AIF1   | -2.0440478 |
| AIFM1  | -2.5574408 |
| AIFM2  | -2.1372273 |
| AIFM3  | -3.1802087 |
| AIG1   | -1.1524134 |
| AIM1   | -0.4038286 |
| AIMP1  | -0.454237  |
| AIMP2  | -0.3513098 |
| AIP    | -0.5249376 |
| AIPL1  | -1.2749698 |
| AIRE   | -1.0042343 |
| AK2    | -2.3368468 |
| AK3    | -3.5279622 |
| AK4    | -4.9890113 |
| AK5    | -0.8578119 |
| AKAP1  | -2.7637305 |

|          |            |
|----------|------------|
| AKAP17B  | -0.5784826 |
| AKAP3    | -1.0789652 |
| AKAP4    | -1.0817616 |
| AKAP6    | -1.1055973 |
| AKAP8L   | -0.9460897 |
| AKIP1    | -1.3831358 |
| AKP3     | -1.3871677 |
| AKR1A1   | -1.4821801 |
| AKR1B10  | -1.2233005 |
| AKR1B7   | -6.953574  |
| AKR1C12  | -6.1477613 |
| AKR1C13  | -4.9200063 |
| AKR1C14  | -1.6365433 |
| AKR1C18  | -7.7676725 |
| AKR1C19  | -7.056385  |
| AKR1C20  | -9.662298  |
| AKR1C6   | -12.091644 |
| AKR1D1   | -8.518875  |
| AKR1E1   | -2.5996344 |
| AKR7A5   | -4.7654104 |
| AKT1S1   | -1.9431145 |
| AKT2     | -0.7412887 |
| ALAD     | -4.215611  |
| ALAS1    | -2.058629  |
| ALB      | -3.2544422 |
| ALDH16A1 | -2.7070398 |
| ALDH1A1  | -1.4661446 |
| ALDH1A7  | -1.7483149 |
| ALDH1B1  | -5.5744348 |
| ALDH1L1  | -5.1590133 |
| ALDH2    | -2.9934263 |
| ALDH3A2  | -2.2796092 |
| ALDH4A1  | -5.39304   |
| ALDH5A1  | -3.4972596 |
| ALDH6A1  | -3.2553105 |
| ALDH7A1  | -4.671101  |
| ALDH8A1  | -6.247167  |
| ALDH9A1  | -3.8063483 |
| ALDOB    | -3.878439  |
| ALDOC    | -2.4826446 |
| ALG14    | -1.4639621 |
| ALG2     | -0.5763688 |
| ALG3     | -1.7117255 |
| ALG5     | -1.9544673 |
| ALG6     | -1.8614476 |

|          |            |
|----------|------------|
| ALG8     | -1.3131683 |
| ALG9     | -1.3763547 |
| ALKBH2   | -1.5599303 |
| ALKBH3   | -0.5750442 |
| ALKBH4   | -0.8052387 |
| ALKBH5   | -0.5383582 |
| ALKBH6   | -0.1510968 |
| ALKBH7   | -2.0023851 |
| ALS2     | -1.9782696 |
| ALS2CL   | -0.8111911 |
| ALX1     | -1.6536126 |
| AMACR    | -4.842181  |
| AMBN     | -1.0466664 |
| AMBP     | -3.127634  |
| AMBRA1   | -0.5828748 |
| AMD2     | -0.4411941 |
| AMDHD1   | -8.227308  |
| AMDHD2   | -0.8592157 |
| AMELX    | -1.1016257 |
| AMER2    | -4.3137627 |
| AMFR     | -1.7915487 |
| AMH      | -1.7553873 |
| AMHR2    | -1.7229891 |
| AMIGO1   | -1.2344196 |
| AMIGO2   | -1.9537172 |
| AMMECR1L | -1.1650624 |
| AMN      | -1.9381387 |
| AMOT     | -2.357671  |
| AMPD2    | -1.2686081 |
| AMT      | -4.93569   |
| AMY1     | -4.9435935 |
| AMY2A5   | -4.5241976 |
| AMZ1     | -0.7219977 |
| AMZ2     | -0.7295771 |
| ANAPC1   | -0.3391705 |
| ANAPC10  | -0.2289262 |
| ANAPC11  | -0.4672318 |
| ANAPC13  | -1.5182757 |
| ANAPC2   | -0.2052145 |
| ANAPC5   | -0.7355781 |
| ANAPC7   | -0.8151088 |
| ANG      | -4.028846  |
| ANG2     | -4.2595587 |
| ANG4     | -3.3497949 |
| ANGEL1   | -1.7615318 |

|          |            |
|----------|------------|
| ANGEL2   | -0.6458902 |
| ANGPTL1  | -0.5417132 |
| ANGPTL2  | -1.9744244 |
| ANGPTL3  | -8.264864  |
| ANGPTL4  | -0.6115441 |
| ANGPTL6  | -5.340208  |
| ANK      | -2.8193266 |
| ANKAR    | -1.7061882 |
| ANKDD1A  | -1.6992846 |
| ANKDD1B  | -1.4555657 |
| ANKEF1   | -1.1765399 |
| ANKLE1   | -1.9023244 |
| ANKMY1   | -0.9048977 |
| ANKMY2   | -1.3560917 |
| ANKRD10  | -0.4172797 |
| ANKRD13B | -0.8814373 |
| ANKRD13C | -0.5204663 |
| ANKRD13D | -0.3421083 |
| ANKRD24  | -3.2263098 |
| ANKRD26  | -0.5810931 |
| ANKRD27  | -0.9657803 |
| ANKRD28  | -0.2972341 |
| ANKRD33  | -1.3098333 |
| ANKRD34B | -1.3167145 |
| ANKRD34C | -1.6577015 |
| ANKRD36  | -2.423368  |
| ANKRD39  | -0.6153364 |
| ANKRD40  | -0.4955263 |
| ANKRD46  | -0.9512582 |
| ANKRD52  | -0.2791309 |
| ANKRD54  | -0.4376957 |
| ANKRD55  | -1.5853436 |
| ANKRD6   | -2.1838381 |
| ANKRD63  | -1.1430902 |
| ANKRD65  | -1.8661485 |
| ANKRD7   | -2.021778  |
| ANKRD9   | -0.4306898 |
| ANKS1B   | -1.5884967 |
| ANKS3    | -0.3574412 |
| ANKS4B   | -4.9229136 |
| ANKS6    | -0.3461492 |
| ANKUB1   | -0.2424274 |
| ANKZF1   | -1.4805441 |
| ANLN     | -0.6349831 |
| ANO10    | -0.5546746 |

|        |            |
|--------|------------|
| ANO3   | -1.5143452 |
| ANO5   | -1.6061218 |
| ANO7   | -1.6345382 |
| ANP32A | -1.5164609 |
| ANPEP  | -2.2344007 |
| ANTXR2 | -0.6412296 |
| ANXA10 | -2.661473  |
| ANXA13 | -2.4499216 |
| ANXA5  | -0.2669668 |
| ANXA6  | -1.0089121 |
| AOC2   | -0.2359543 |
| AOX1   | -2.2279387 |
| AOX2   | -1.500634  |
| AOX3   | -1.4043355 |
| AP1AR  | -0.6650903 |
| AP1B1  | -1.0945997 |
| AP1G1  | -0.5105486 |
| AP1M1  | -0.2785811 |
| AP1S1  | -1.1010175 |
| AP2A1  | -0.5366983 |
| AP2A2  | -0.8968167 |
| AP2B1  | -1.2056603 |
| AP2M1  | -1.1230617 |
| AP2S1  | -1.0306382 |
| AP3D1  | -0.3455997 |
| AP3M1  | -1.8332615 |
| AP3M2  | -0.3272286 |
| AP3S1  | -0.313777  |
| AP3S2  | -0.4212141 |
| AP4B1  | -1.0422573 |
| AP4M1  | -0.7346263 |
| AP4S1  | -0.7397718 |
| AP5M1  | -0.8155012 |
| AP5S1  | -1.3766298 |
| APBA3  | -1.7477112 |
| APBB3  | -0.6582832 |
| APC    | -1.2554681 |
| APCS   | -4.018372  |
| APEH   | -2.0333214 |
| APEX1  | -1.6131859 |
| APH1A  | -1.379631  |
| API5   | -0.5571623 |
| APIP   | -0.9589148 |
| APLP2  | -0.8125434 |
| APMAP  | -1.4498839 |

|         |            |
|---------|------------|
| APOA1   | -5.9684196 |
| APOA1BP | -2.420999  |
| APOA2   | -4.1857924 |
| APOA4   | -3.2281857 |
| APOA5   | -4.840757  |
| APOB    | -4.9471297 |
| APOBEC1 | -0.945219  |
| APOBEC3 | -0.4326119 |
| APOC1   | -3.2712903 |
| APOC2   | -4.479203  |
| APOC3   | -6.384361  |
| APOC4   | -7.508519  |
| APOE    | -2.3241482 |
| APOF    | -5.061776  |
| APOH    | -5.2754345 |
| APOL10A | -3.221645  |
| APOL11B | -0.4014931 |
| APOL7A  | -6.499874  |
| APOL7C  | -3.9852617 |
| APOL7D  | -1.5596051 |
| APOL8   | -0.8462291 |
| APOL9A  | -5.1111317 |
| APOL9B  | -5.0484877 |
| APOM    | -6.568464  |
| APON    | -5.4405413 |
| APOO    | -1.7334447 |
| APOOL   | -1.5512457 |
| APOPT1  | -0.7561951 |
| APRT    | -0.6572776 |
| AQP11   | -6.186006  |
| AQP6    | -1.7731271 |
| AQP8    | -8.051424  |
| AQP9    | -6.1186905 |
| ARAF    | -1.3199353 |
| ARAP1   | -0.9746938 |
| ARCN1   | -0.5901685 |
| AREL1   | -1.2191415 |
| ARF1    | -0.7547574 |
| ARF4    | -0.702806  |
| ARF5    | -1.2845054 |
| ARF6    | -0.5835009 |
| ARFGAP1 | -0.3999686 |
| ARFGAP2 | -2.101653  |
| ARFGEF2 | -0.3348069 |
| ARFIP1  | -0.2452004 |



|            |            |
|------------|------------|
| ARFRP1     | -0.2664533 |
| ARG1       | -3.6433387 |
| ARHGAP17   | -0.7928987 |
| ARHGAP21   | -0.4459224 |
| ARHGAP29   | -0.9584184 |
| ARHGAP33O' | -1.0901604 |
| ARHGAP35   | -1.2724781 |
| ARHGAP4    | -0.3467746 |
| ARHGAP42   | -2.4727576 |
| ARHGAP5    | -0.4890547 |
| ARHGEF10   | -1.4396043 |
| ARHGEF10L  | -1.5183911 |
| ARHGEF12   | -0.4644008 |
| ARHGEF15   | -0.8432951 |
| ARHGEF16   | -0.4125214 |
| ARHGEF18   | -0.5938325 |
| ARHGEF19   | -4.7586126 |
| ARHGEF37   | -1.4508796 |
| ARHGEF39   | -1.6079986 |
| ARHGEF40   | -1.6615644 |
| ARHGEF9    | -2.8648717 |
| ARID1A     | -0.3603101 |
| ARID3C     | -1.8889182 |
| ARIH2      | -0.3916097 |
| ARL1       | -0.6674814 |
| ARL13A     | -1.1695089 |
| ARL14      | -2.1567593 |
| ARL14EPL   | -2.74612   |
| ARL16      | -0.6230032 |
| ARL3       | -0.2320747 |
| ARL4AOS    | -1.6302814 |
| ARL4D      | -0.7321773 |
| ARL5A      | -1.426734  |
| ARL6IP4    | -0.8048167 |
| ARL6IP5    | -0.1960287 |
| ARL6IP6    | -0.6003118 |
| ARL8B      | -0.3206658 |
| ARL9       | -1.1294098 |
| ARMC1      | -1.3142142 |
| ARMC12     | -2.1798196 |
| ARMC6      | -1.2524204 |
| ARMC8      | -0.2592144 |
| ARMC9      | -1.930237  |
| ARNT       | -0.1628237 |
| ARNT2      | -1.0990634 |

|          |            |
|----------|------------|
| ARNTL    | -0.4794984 |
| ARNTL2   | -0.4705365 |
| ARPC1A   | -0.6152787 |
| ARPC4    | -0.9404903 |
| ARPC5L   | -0.6545382 |
| ARPP19   | -0.4401901 |
| ARR3     | -0.9000843 |
| ARRDC3   | -0.2882328 |
| ARRDC5   | -1.1469479 |
| ARSB     | -1.4802248 |
| ARSG     | -1.8911371 |
| ARSK     | -2.0048172 |
| ART2A-PS | -5.1734076 |
| ART4     | -1.3524423 |
| ARV1     | -0.224618  |
| ARVCF    | -2.894963  |
| ARXES1   | -1.3739603 |
| AS3MT    | -3.4024534 |
| ASAH1    | -0.559782  |
| ASAH2    | -1.659693  |
| ASAP3    | -0.6632905 |
| ASB13    | -2.188902  |
| ASB16    | -1.0812759 |
| ASB18    | -1.4608216 |
| ASB2     | -1.1251178 |
| ASB8     | -0.7759824 |
| ASB9     | -1.0910437 |
| ASCC1    | -1.5420351 |
| ASGR1    | -5.885416  |
| ASGR2    | -6.2418256 |
| ASH2L    | -0.225605  |
| ASIC1    | -1.517946  |
| ASIC5    | -5.0916147 |
| ASL      | -4.358794  |
| ASNSD1   | -0.9431806 |
| ASPA     | -3.797325  |
| ASPDH    | -4.2455077 |
| ASPG     | -3.524322  |
| ASPM     | -0.7505887 |
| ASPSCR1  | -2.1011758 |
| ASS1     | -4.4865127 |
| ASTN2    | -1.2284651 |
| ASXL2    | -0.1791549 |
| ATAD1    | -0.5498958 |
| ATAD3A   | -1.9936361 |

|           |            |
|-----------|------------|
| ATAD3AOS  | -2.6525164 |
| ATAT1     | -1.4738615 |
| ATCAY     | -1.1494355 |
| ATF1      | -0.3211703 |
| ATF5      | -2.9614897 |
| ATF6B     | -0.554369  |
| ATF7IP2   | -1.4911232 |
| ATG10     | -0.285614  |
| ATG101    | -1.2062459 |
| ATG12     | -0.3716641 |
| ATG13     | -0.5014896 |
| ATG14     | -0.8850341 |
| ATG16L1   | -1.0685921 |
| ATG16L2   | -1.5816951 |
| ATG2A     | -1.6471753 |
| ATG2B     | -0.8774328 |
| ATG3      | -0.9447112 |
| ATG4A     | -1.5985456 |
| ATG4B     | -1.4790149 |
| ATG4C     | -1.6795025 |
| ATG4D     | -1.526434  |
| ATG5      | -1.9976993 |
| ATG7      | -0.7919197 |
| ATG9B     | -0.7302928 |
| ATHL1     | -2.0157948 |
| ATIC      | -0.782145  |
| ATL2      | -2.2274694 |
| ATM       | -0.4518299 |
| ATOH7     | -3.1034536 |
| ATOH8     | -1.4510298 |
| ATOX1     | -1.7188821 |
| ATP11B    | -0.5223007 |
| ATP11C    | -2.913218  |
| ATP12A    | -2.2976499 |
| ATP13A1   | -1.1353946 |
| ATP13A2   | -0.7355232 |
| ATP13A5   | -0.5288749 |
| ATP1A1    | -0.6629996 |
| ATP2B2    | -4.608556  |
| ATP4A     | -1.695869  |
| ATP4B     | -1.5246539 |
| ATP5A1    | -1.5414224 |
| ATP5B     | -1.8671651 |
| ATP5C1    | -2.4078193 |
| ATP5C1-PS | -2.063024  |

|          |            |
|----------|------------|
| ATP5D    | -2.7721362 |
| ATP5E    | -2.1601443 |
| ATP5F1   | -1.7570071 |
| ATP5G1   | -2.3248882 |
| ATP5G2   | -1.4583807 |
| ATP5G3   | -1.9852748 |
| ATP5H    | -1.4355698 |
| ATP5J    | -1.988955  |
| ATP5J2   | -2.104322  |
| ATP5K    | -2.2065883 |
| ATP5L    | -1.4784522 |
| ATP5O    | -1.9230866 |
| ATP5S    | -1.1293559 |
| ATP5SL   | -1.8676624 |
| ATP6     | -1.8996391 |
| ATP6AP2  | -0.1324415 |
| ATP6V0B  | -1.5166726 |
| ATP6V0C  | -0.5192981 |
| ATP6V0D1 | -0.4083319 |
| ATP6V1D  | -0.8252368 |
| ATP6V1E1 | -1.2028971 |
| ATP6V1E2 | -1.1301823 |
| ATP6V1F  | -0.5461555 |
| ATP6V1H  | -0.6953812 |
| ATP8     | -1.820519  |
| ATP8A2   | -1.02227   |
| ATP8B1   | -1.5747681 |
| ATP8B3   | -1.0940068 |
| ATP8B5   | -0.4274745 |
| ATP9A    | -1.4720507 |
| ATPAF2   | -1.8754072 |
| ATPIF1   | -0.9384608 |
| ATRAID   | -2.0441241 |
| ATRIP    | -0.5949268 |
| ATRN     | -1.1159778 |
| ATXN2    | -1.3679271 |
| ATXN3    | -0.4315298 |
| ATXN7    | -0.6141014 |
| ATXN7L3B | -1.2900214 |
| AUH      | -1.4301963 |
| AUP1     | -1.6662121 |
| AURKAIP1 | -1.1109653 |
| AVEN     | -1.1868844 |
| AVIL     | -1.1294401 |
| AVP      | -2.2802808 |

|          |            |
|----------|------------|
| AVPI1    | -0.6304679 |
| AVPR1A   | -4.49965   |
| AVPR2    | -0.9936578 |
| AWAT2    | -1.7276182 |
| AXL      | -0.2436595 |
| AZGP1    | -5.8032675 |
| B2M      | -1.1404343 |
| B3GALT1  | -0.8008552 |
| B3GALT4  | -0.2979131 |
| B3GALT6  | -0.409838  |
| B3GAT2   | -1.0949054 |
| B3GAT3   | -1.0690484 |
| B3GNT1   | -1.8669481 |
| B3GNT3   | -0.3001466 |
| B3GNTL1  | -1.5337121 |
| B4GALNT1 | -0.6596975 |
| B4GALNT3 | -1.232903  |
| B4GALNT4 | -0.7953799 |
| B4GALT7  | -0.798954  |
| BAAT     | -5.572482  |
| BABAM1   | -1.3624444 |
| BACE1    | -2.0300803 |
| BACE2    | -0.3838415 |
| BAD      | -0.9553475 |
| BAG1     | -0.3677893 |
| BAG2     | -0.3207822 |
| BAG4     | -1.8865271 |
| BAG5     | -0.4623256 |
| BAG6     | -0.8697124 |
| BAHD1    | -0.1928105 |
| BAI1     | -1.26596   |
| BAI2     | -0.2730379 |
| BAI3     | -1.5991509 |
| BAIAP2   | -1.1196828 |
| BAIAP2L1 | -1.3050814 |
| BAIAP3   | -2.7836924 |
| BANF1    | -1.2988582 |
| BANF2    | -1.052671  |
| BANK1    | -1.3270645 |
| BANP     | -1.8459654 |
| BARX1    | -2.8394337 |
| BAZ2A    | -0.3463893 |
| BBC3     | -1.5180125 |
| BBOX1    | -7.3196287 |
| BBS10    | -3.299917  |

|          |            |
|----------|------------|
| BBS5     | -1.4639199 |
| BBS7     | -0.8093944 |
| BCAN     | -0.5220065 |
| BCAP31   | -1.7276063 |
| BCAR1    | -0.4499793 |
| BCAS1    | -0.5430043 |
| BCAS1OS2 | -1.1209443 |
| BCAS2    | -0.7487865 |
| BCAS3    | -0.7173576 |
| BCAT2    | -1.7117853 |
| BCCIP    | -1.5989952 |
| BCDIN3D  | -0.8607497 |
| BCHE     | -6.8308935 |
| BCKDHA   | -3.9227743 |
| BCKDHB   | -3.4680228 |
| BCKDK    | -0.5133076 |
| BCL2L10  | -0.9948239 |
| BCL2L12  | -1.5206227 |
| BCL2L13  | -1.8975806 |
| BCL7A    | -0.8653581 |
| BCL7C    | -0.6766362 |
| BCL9L    | -2.1376343 |
| BCMO1    | -2.6928766 |
| BCO2     | -5.778481  |
| BCOR     | -0.3854036 |
| BCORL1   | -1.4659209 |
| BCS1L    | -2.2183123 |
| BDH1     | -6.99183   |
| BDH2     | -5.026293  |
| BE949265 | -2.0953557 |
| BEND3    | -0.2772203 |
| BEND6    | -0.9410651 |
| BET1     | -1.6129456 |
| BEX6     | -1.5858159 |
| BFAR     | -0.4113879 |
| BGLAP    | -1.7392871 |
| BHLHB9   | -1.5627263 |
| BHLHE23  | -1.1002283 |
| BHMT     | -8.618757  |
| BHMT2    | -5.924772  |
| BID      | -0.6983581 |
| BIN1     | -0.3580461 |
| BIRC5    | -0.7903371 |
| BIRC6    | -0.3474531 |
| BIVM     | -1.9868386 |

|         |            |
|---------|------------|
| BLCAP   | -1.1403198 |
| BLM     | -0.3495412 |
| BLMH    | -0.8027058 |
| BLOC1S1 | -1.6291776 |
| BLOC1S2 | -0.8617659 |
| BLOC1S3 | -0.7083931 |
| BLOC1S4 | -0.4732409 |
| BLOC1S5 | -3.0397835 |
| BLOC1S6 | -0.4874539 |
| BLVRA   | -0.6237049 |
| BLVRB   | -3.0083966 |
| BMP1    | -2.7085614 |
| BMP10   | -2.215372  |
| BMP2    | -3.589748  |
| BMP7    | -1.15958   |
| BMP8B   | -1.1960144 |
| BMYC    | -0.5817227 |
| BNIP1   | -2.025772  |
| BNIP3   | -1.4297695 |
| BOD1    | -1.1665344 |
| BOK     | -1.6608129 |
| BOLA1   | -1.7311594 |
| BOLA2   | -0.497673  |
| BOLA3   | -2.1670732 |
| BOP1    | -0.6593943 |
| BPGM    | -0.6175928 |
| BPHL    | -4.406013  |
| BPIFA2  | -1.1472659 |
| BPIFA3  | -0.7673762 |
| BPIFB2  | -1.5080628 |
| BPIFB4  | -2.3820868 |
| BPIFB9B | -0.9637094 |
| BPIFC   | -1.1237688 |
| BPNT1   | -1.8115108 |
| BRAP    | -1.8412576 |
| BRAT1   | -0.806325  |
| BRCA1   | -2.1815772 |
| BRCA2   | -1.1539047 |
| BRCC3   | -0.7818775 |
| BRD3    | -1.393961  |
| BRE     | -0.2749243 |
| BRF2    | -1.1887074 |
| BRI3    | -0.2917399 |
| BRI3BP  | -1.3433514 |
| BRICD5  | -1.8305204 |

|           |            |
|-----------|------------|
| BRINP2    | -1.0449796 |
| BRIP1     | -0.8777785 |
| BRIP1OS   | -2.0222504 |
| BRK1      | -0.6625991 |
| BRMS1     | -0.4973149 |
| BRS3      | -1.4926395 |
| BRSK2     | -1.614536  |
| BSCL2     | -2.0494719 |
| BSDC1     | -0.9985805 |
| BSG       | -2.136869  |
| BSN       | -1.2233572 |
| BSPH1     | -1.2731717 |
| BSX       | -2.0175934 |
| BTBD16    | -0.9440336 |
| BTBD2     | -1.7796569 |
| BTBD6     | -2.0414376 |
| BTBD8     | -1.1651945 |
| BTBD9     | -0.2875671 |
| BTC       | -1.6303971 |
| BTD       | -3.2700243 |
| BTF3      | -0.3061075 |
| BTF3L4    | -0.4750233 |
| BTG4      | -1.4309032 |
| BTN1A1    | -0.9579516 |
| BTN2A2    | -1.5718691 |
| BTNL10    | -0.3131104 |
| BTNL9     | -0.4689574 |
| BUB1B     | -0.7806511 |
| BUD31     | -0.4162736 |
| BYSL      | -0.4308138 |
| BZRAP1    | -0.3150954 |
| BZW1      | -0.1969452 |
| C1GALT1C1 | -0.4706068 |
| C1QA      | -2.404663  |
| C1QB      | -2.2561574 |
| C1QBP     | -1.2312746 |
| C1QC      | -2.555378  |
| C1QL1     | -2.6636224 |
| C1QL2     | -0.9875493 |
| C1QL3     | -3.9665852 |
| C1QL4     | -2.1652875 |
| C1QTNF1   | -0.4624596 |
| C1QTNF2   | -0.8079989 |
| C1RA      | -1.2156839 |
| C1RB      | -0.7302361 |



|          |            |
|----------|------------|
| C1RL     | -3.5433183 |
| C1S1     | -1.134778  |
| C1S2     | -1.1009212 |
| C2       | -2.3774672 |
| C2CD2    | -2.8591323 |
| C2CD2L   | -1.5431724 |
| C2CD4D   | -2.7110562 |
| C3       | -1.4945536 |
| C4B      | -2.8549414 |
| C4BP     | -4.9429207 |
| C5AR2    | -1.0415745 |
| C6       | -1.2727351 |
| C8A      | -5.108748  |
| C8B      | -4.738978  |
| C8G      | -7.08279   |
| C9       | -7.750138  |
| CAB39L   | -1.9798121 |
| CABIN1   | -0.3712802 |
| CABLES1  | -0.3793116 |
| CABLES2  | -1.7391944 |
| CABP1    | -1.0512154 |
| CABP2    | -3.5215533 |
| CABP4    | -1.1859162 |
| CABP7    | -1.3489478 |
| CACFD1   | -1.3476629 |
| CACNA1A  | -0.7839832 |
| CACNA1F  | -1.3453133 |
| CACNA1G  | -1.0536051 |
| CACNA2D3 | -1.6416898 |
| CACNB4   | -1.9970429 |
| CACNG2   | -1.2205484 |
| CACNG3   | -1.3841505 |
| CACNG4   | -2.463021  |
| CACNG7   | -4.198801  |
| CACUL1   | -0.5881047 |
| CACYBP   | -0.6986318 |
| CADM1    | -1.8421421 |
| CADM3    | -3.0446825 |
| CADM4    | -0.1498559 |
| CADPS2   | -0.2559452 |
| CAGE1    | -0.5325871 |
| CALB1    | -0.9407899 |
| CALB2    | -2.4901586 |
| CALCB    | -1.0696862 |
| CALCOCO2 | -0.8487856 |

|         |            |
|---------|------------|
| CALD1   | -1.2926054 |
| CALHM1  | -2.2075078 |
| CALHM2  | -1.3725626 |
| CALML4  | -1.9742827 |
| CALN1   | -1.2198219 |
| CALR    | -1.4052315 |
| CALR3   | -2.2683034 |
| CALR4   | -0.6080868 |
| CAMK1   | -1.1440256 |
| CAMK1D  | -3.1892633 |
| CAMK2N1 | -0.8410168 |
| CAMK2N2 | -0.1838512 |
| CAMKMT  | -0.6931427 |
| CAML    | -0.8943648 |
| CAMSAP3 | -1.1551251 |
| CAMTA2  | -0.4357758 |
| CAND1   | -0.3629036 |
| CAND2   | -1.7849262 |
| CANX    | -0.2970405 |
| CAPN10  | -2.9874105 |
| CAPN12  | -1.2415192 |
| CAPN15  | -0.7116256 |
| CAPN5   | -0.8827465 |
| CAPN6   | -1.9985287 |
| CAPN8   | -0.9964485 |
| CAPN9   | -1.2664802 |
| CAPRIN1 | -1.0470924 |
| CAPRIN2 | -0.8687098 |
| CAPZA1  | -0.5141139 |
| CAPZA3  | -1.4670403 |
| CAR1    | -4.2217875 |
| CAR10   | -1.2263238 |
| CAR11   | -1.1627853 |
| CAR14   | -5.1350937 |
| CAR2    | -0.8069387 |
| CAR3    | -5.797546  |
| CAR5A   | -10.312325 |
| CAR6    | -2.0746229 |
| CAR7    | -2.8841982 |
| CARD10  | -1.040492  |
| CARD6   | -0.6148212 |
| CARHSP1 | -0.8410935 |
| CARKD   | -1.4656072 |
| CARM1   | -0.8292017 |
| CARNS1  | -0.5337975 |

|           |            |
|-----------|------------|
| CARS      | -0.4735985 |
| CARS2     | -1.4308896 |
| CASD1     | -0.3995166 |
| CASKIN1   | -1.0066524 |
| CASP16    | -0.9943733 |
| CASP6     | -2.1137185 |
| CASP7     | -1.1133952 |
| CASP8     | -0.6943903 |
| CASP9     | -1.056716  |
| CAT       | -4.88025   |
| CATSPER1  | -2.048196  |
| CATSPER2  | -1.8506026 |
| CATSPERB  | -1.3438754 |
| CATSPERD  | -1.821074  |
| CATSPERG2 | -1.998261  |
| CBLC      | -2.636909  |
| CBLN1     | -0.8724885 |
| CBLN2     | -1.6272054 |
| CBLN3     | -1.3529851 |
| CBLN4     | -1.7029331 |
| CBR1      | -4.0520997 |
| CBR4      | -2.1427145 |
| CBS       | -5.2166934 |
| CBX1      | -0.511198  |
| CBX2      | -3.7345815 |
| CBX3      | -0.2131949 |
| CBX4      | -0.4598618 |
| CBX7      | -1.0123882 |
| CBX8      | -2.9603398 |
| CBY1      | -1.548671  |
| CC2D1A    | -0.7547312 |
| CC2D2B    | -1.6040761 |
| CCAR1     | -0.2503762 |
| CCBL1     | -3.8598757 |
| CCBL2     | -3.9397116 |
| CCDC101   | -0.2973614 |
| CCDC104   | -0.3571248 |
| CCDC105   | -1.5971403 |
| CCDC106   | -1.3728364 |
| CCDC107   | -2.3993826 |
| CCDC117   | -0.3386788 |
| CCDC12    | -0.5684962 |
| CCDC124   | -0.8309431 |
| CCDC125   | -0.9520612 |
| CCDC130   | -0.5322676 |

|          |            |
|----------|------------|
| CCDC137  | -0.5376773 |
| CCDC138  | -1.102736  |
| CCDC142  | -1.015403  |
| CCDC144B | -0.4274359 |
| CCDC148  | -1.4793234 |
| CCDC151  | -0.7419658 |
| CCDC152  | -0.9461048 |
| CCDC154  | -1.703901  |
| CCDC157  | -0.3005536 |
| CCDC159  | -2.9979682 |
| CCDC162  | -2.2174053 |
| CCDC163  | -0.2049475 |
| CCDC166  | -2.06179   |
| CCDC167  | -1.952049  |
| CCDC171  | -1.2344949 |
| CCDC172  | -1.7788899 |
| CCDC175  | -2.154872  |
| CCDC177  | -1.7310812 |
| CCDC178  | -1.6410787 |
| CCDC183  | -1.0735657 |
| CCDC185  | -2.495781  |
| CCDC22   | -0.7392235 |
| CCDC23   | -0.3834686 |
| CCDC25   | -0.3666887 |
| CCDC27   | -2.6482208 |
| CCDC28A  | -1.6072836 |
| CCDC28B  | -0.7941337 |
| CCDC3    | -2.5734081 |
| CCDC32   | -0.2254276 |
| CCDC34   | -0.7013538 |
| CCDC36   | -0.9087443 |
| CCDC42   | -0.4311087 |
| CCDC42OS | -2.4487247 |
| CCDC43   | -1.044177  |
| CCDC51   | -1.9422936 |
| CCDC53   | -1.2149444 |
| CCDC54   | -1.5659797 |
| CCDC58   | -2.1315603 |
| CCDC61   | -0.6890888 |
| CCDC68   | -0.6112585 |
| CCDC7    | -2.0409691 |
| CCDC70   | -1.4322731 |
| CCDC71   | -0.8310871 |
| CCDC8    | -1.8933797 |
| CCDC80   | -1.6727824 |

|          |            |
|----------|------------|
| CCDC83   | -1.3946083 |
| CCDC85C  | -1.2232728 |
| CCDC87   | -1.2232807 |
| CCDC90B  | -0.6366944 |
| CCDC91   | -0.7438555 |
| CCDC94   | -0.5568166 |
| CCDC97   | -0.7603211 |
| CCIN     | -3.4483738 |
| CCKBR    | -1.5682385 |
| CCL20    | -1.6601014 |
| CCL24    | -3.4762614 |
| CCL25    | -1.080091  |
| CCL27A   | -1.4709496 |
| CCL9     | -2.4796805 |
| CCM2     | -0.7756472 |
| CCNA2    | -1.0257478 |
| CCNB1    | -0.7551067 |
| CCNB1IP1 | -0.6659284 |
| CCNB2    | -0.7387066 |
| CCNB3    | -1.5935638 |
| CCND1    | -0.8985996 |
| CCND3    | -0.256062  |
| CCNE1    | -0.3237619 |
| CCNF     | -1.3052135 |
| CCNH     | -1.5800257 |
| CCNI     | -0.7379708 |
| CCNL2    | -0.5701795 |
| CCPG1OS  | -0.3819323 |
| CCR3     | -2.9544892 |
| CCR4     | -0.649297  |
| CCR5     | -0.736053  |
| CCS      | -3.73483   |
| CCT2     | -0.3036175 |
| CCT3     | -0.6675401 |
| CCT4     | -0.219862  |
| CCT5     | -0.4289775 |
| CCT6A    | -0.4518876 |
| CCT6B    | -2.0702155 |
| CCT7     | -0.8584952 |
| CCT8     | -0.3879223 |
| CCZ1     | -0.2560563 |
| CD160    | -1.1529534 |
| CD164    | -0.9498119 |
| CD180    | -1.8065138 |
| CD1D1    | -5.489639  |

|          |            |
|----------|------------|
| CD1D2    | -5.6875157 |
| CD200R1  | -1.6134086 |
| CD200R4  | -2.0725062 |
| CD207    | -1.5896912 |
| CD209B   | -2.2934585 |
| CD209C   | -0.198976  |
| CD22     | -1.8305578 |
| CD248    | -1.7309313 |
| CD27     | -0.2464593 |
| CD276    | -1.742728  |
| CD2AP    | -0.6774759 |
| CD300C   | -1.5255132 |
| CD300E   | -2.9789872 |
| CD300LB  | -1.551337  |
| CD300LD  | -2.5910368 |
| CD300LH  | -2.2324786 |
| CD302    | -2.2162604 |
| CD320    | -0.7632842 |
| CD3E     | -0.184968  |
| CD4      | -3.4742584 |
| CD59A    | -3.5795856 |
| CD59B    | -4.3090315 |
| CD5L     | -5.8807607 |
| CD7      | -1.4984822 |
| CD74     | -1.1544437 |
| CD81     | -2.5081868 |
| CD82     | -0.701601  |
| CD86     | -0.216464  |
| CD8A     | -0.2667754 |
| CD99L2   | -0.687438  |
| CDA      | -5.89078   |
| CDADC1   | -1.3914666 |
| CDC123   | -0.8705711 |
| CDC14B   | -2.599832  |
| CDC16    | -0.7526064 |
| CDC20    | -1.3340449 |
| CDC25A   | -0.1690798 |
| CDC26    | -1.0614939 |
| CDC34    | -1.2407498 |
| CDC37    | -0.9454732 |
| CDC37L1  | -0.8966532 |
| CDC42EP5 | -0.6319165 |
| CDCA3    | -1.5235028 |
| CDCA5    | -0.5743718 |
| CDCA8    | -0.459794  |

|            |            |
|------------|------------|
| CDCP2      | -6.809265  |
| CDH17      | -1.547636  |
| CDH18      | -0.9365137 |
| CDH19      | -1.407835  |
| CDH2       | -4.100141  |
| CDH20      | -2.131555  |
| CDH24      | -1.3994622 |
| CDH26      | -0.7157407 |
| CDH3       | -0.8811805 |
| CDH4       | -0.8416414 |
| CDH8       | -1.1588719 |
| CDH9       | -1.0604022 |
| CDHR2      | -1.1625075 |
| CDHR5      | -4.2232065 |
| CDIP1      | -2.4106822 |
| CDIPT      | -0.5870576 |
| CDK1       | -1.0921936 |
| CDK10      | -1.6963091 |
| CDK16      | -0.4429445 |
| CDK18      | -1.6485839 |
| CDK19OS    | -1.1336591 |
| CDK20      | -1.423944  |
| CDK2AP1    | -0.6550942 |
| CDK2AP2    | -0.9485397 |
| CDK4       | -0.3677096 |
| CDK5       | -1.1875563 |
| CDK5R2     | -2.1230512 |
| CDK5RAP1   | -0.7526212 |
| CDK5RAP3   | -2.0430498 |
| CDK7       | -0.4038541 |
| CDK8       | -0.2181048 |
| CDK9       | -0.3332443 |
| CDKAL1     | -0.3093143 |
| CDKL5      | -1.0992503 |
| CDKN1C     | -0.526403  |
| CDKN2A     | -2.192596  |
| CDKN2AIP   | -1.1013448 |
| CDKN2AIPNL | -0.7086959 |
| CDKN2C     | -2.2640407 |
| CDKN3      | -0.998189  |
| CDO1       | -2.937409  |
| CDRT4      | -1.1736472 |
| CDS2       | -1.688077  |
| CDV3       | -0.5403166 |
| CDX1       | -1.1592841 |

|          |            |
|----------|------------|
| CDX4     | -3.1525402 |
| CEACAM12 | -1.4525476 |
| CEACAM13 | -2.2181423 |
| CEACAM2  | -0.2063055 |
| CEACAM20 | -1.0048926 |
| CEACAM3  | -1.3995209 |
| CEACAM5  | -0.8816304 |
| CEACAM9  | -1.0804124 |
| CEBPA    | -1.8883462 |
| CEBPZOS  | -2.34861   |
| CECR5    | -1.3812535 |
| CELA2A   | -1.7671096 |
| CELF1    | -0.4642687 |
| CELF3    | -1.3231971 |
| CELSR1   | -0.2823095 |
| CEND1    | -1.6702578 |
| CENPA    | -1.3744411 |
| CENPF    | -1.4427307 |
| CENPH    | -0.590018  |
| CENPI    | -0.4709511 |
| CENPK    | -1.084446  |
| CENPL    | -2.0437107 |
| CENPM    | -1.721859  |
| CENPN    | -0.9692466 |
| CENPP    | -2.0602174 |
| CENPQ    | -0.317153  |
| CENPV    | -2.2441196 |
| CENPW    | -0.8418703 |
| CEP131   | -1.7098374 |
| CEP152   | -0.6729398 |
| CEP164   | -0.390409  |
| CEP170B  | -0.8813691 |
| CEP19    | -0.6581035 |
| CEP41    | -0.8474    |
| CEP44    | -1.0134921 |
| CEP57L1  | -1.7753086 |
| CEP68    | -1.8030863 |
| CEP72    | -3.061115  |
| CEP76    | -0.2348948 |
| CEP78    | -0.6185017 |
| CEP89    | -0.3715253 |
| CEP97    | -0.4313045 |
| CEPT1    | -0.787859  |
| CERKL    | -1.7669833 |
| CERS2    | -2.072867  |



|         |            |
|---------|------------|
| CES1B   | -6.885148  |
| CES1C   | -6.439987  |
| CES1D   | -4.1207337 |
| CES1E   | -5.9157376 |
| CES1F   | -7.885251  |
| CES1G   | -8.066416  |
| CES1H   | -1.163672  |
| CES2A   | -6.6003733 |
| CES2B   | -4.902066  |
| CES2C   | -6.4131393 |
| CES2E   | -6.9534492 |
| CES2G   | -4.3401766 |
| CES2H   | -2.1560574 |
| CES3A   | -9.375826  |
| CES3B   | -10.032635 |
| CES4A   | -2.9161184 |
| CES5A   | -1.4066353 |
| CETN1   | -0.3834574 |
| CFB     | -1.7198343 |
| CFDP1   | -0.4561963 |
| CFH     | -2.351603  |
| CFHR1   | -6.581663  |
| CFHR2   | -3.486517  |
| CFI     | -5.2741585 |
| CFL2    | -0.9616227 |
| CFP     | -1.5623345 |
| CGGBP1  | -0.3016367 |
| CGREF1  | -2.0882146 |
| CGRRF1  | -1.1106839 |
| CHAC2   | -3.8662016 |
| CHADL   | -2.2755833 |
| CHAF1B  | -0.5577822 |
| CHAT    | -0.7208324 |
| CHCHD1  | -1.183166  |
| CHCHD10 | -2.9440718 |
| CHCHD2  | -1.6403446 |
| CHCHD3  | -2.1065516 |
| CHCHD4  | -0.7071242 |
| CHCHD5  | -1.5780592 |
| CHCHD6  | -0.7589617 |
| CHCHD7  | -1.2356372 |
| CHD1L   | -0.424767  |
| CHD3    | -1.1313109 |
| CHD9    | -0.5262532 |
| CHDH    | -5.0213375 |

|         |            |
|---------|------------|
| CHFR    | -0.3779116 |
| CHID1   | -1.85865   |
| CHKA    | -1.5885577 |
| CHKB    | -1.311521  |
| CHMP1A  | -0.9513607 |
| CHMP2A  | -0.3463016 |
| CHMP3   | -0.3690462 |
| CHMP5   | -0.6023369 |
| CHMP6   | -1.3995829 |
| CHMP7   | -1.3275776 |
| CHN1OS3 | -1.5943477 |
| CHN2    | -3.4076538 |
| CHODL   | -2.0892613 |
| CHORDC1 | -1.4468431 |
| CHP1    | -1.0545464 |
| CHP2    | -3.480878  |
| CHPF2   | -0.7679272 |
| CHPT1   | -1.4161444 |
| CHRAC1  | -0.3034258 |
| CHRD    | -0.9109039 |
| CHRD1   | -0.8109739 |
| CHRM1   | -1.4331248 |
| CHRM5   | -2.2712235 |
| CHRNA2  | -2.3636346 |
| CHRNA4  | -2.9210727 |
| CHRNA5  | -1.9414175 |
| CHRNA6  | -0.7702167 |
| CHRNA9  | -1.0735142 |
| CHRN2   | -1.6813495 |
| CHRN3   | -1.403089  |
| CHRNG   | -5.720277  |
| CHST13  | -4.129434  |
| CHST2   | -1.1344259 |
| CHST7   | -1.0123343 |
| CHST9   | -2.1611264 |
| CHSY3   | -1.5674813 |
| CHTF18  | -0.9802804 |
| CHTF8   | -1.5345812 |
| CHUK    | -1.5605774 |
| CHURC1  | -1.3339744 |
| CIAO1   | -1.8773537 |
| CIAPIN1 | -1.243938  |
| CIART   | -1.5642471 |
| CIB1    | -1.8766975 |
| CIB3    | -1.5303714 |

|          |            |
|----------|------------|
| CIDEB    | -5.8306055 |
| CINP     | -0.805974  |
| CIPC     | -0.4524751 |
| CIRH1A   | -0.5211391 |
| CISD1    | -3.7925606 |
| CISD2    | -0.6605797 |
| CISD3    | -3.0383248 |
| CK137956 | -2.1806054 |
| CKAP2    | -2.2773705 |
| CKB      | -1.300385  |
| CKS1B    | -0.2676354 |
| CLCA1    | -0.27491   |
| CLCC1    | -0.9994788 |
| CLCN2    | -5.7216597 |
| CLCN3    | -1.0609231 |
| CLCN4-2  | -1.5718379 |
| CLCN7    | -1.2201443 |
| CLDN1    | -3.6325343 |
| CLDN12   | -2.4039311 |
| CLDN14   | -2.1751513 |
| CLDN15   | -0.6234598 |
| CLDN16   | -1.643707  |
| CLDN2    | -3.098474  |
| CLDN26   | -0.5375583 |
| CLDN3    | -1.0551262 |
| CLDND2   | -1.4811687 |
| CLEC11A  | -2.7441707 |
| CLEC12A  | -3.808196  |
| CLEC12B  | -1.9372802 |
| CLEC16A  | -0.6832554 |
| CLEC18A  | -1.2522225 |
| CLEC1B   | -4.06743   |
| CLEC2D   | -0.2340927 |
| CLEC2E   | -3.6769066 |
| CLEC2F   | -1.244359  |
| CLEC2G   | -0.8175759 |
| CLEC2H   | -5.4667115 |
| CLEC4B2  | -1.6328657 |
| CLEC4F   | -9.348283  |
| CLEC4G   | -9.776196  |
| CLEC7A   | -0.9118342 |
| CLEC9A   | -0.5394869 |
| CLHC1    | -0.7299888 |
| CLK3     | -0.5171413 |
| CLMN     | -2.5739956 |

|         |            |
|---------|------------|
| CLN3    | -0.41188   |
| CLN5    | -0.5771184 |
| CLN6    | -0.9492116 |
| CLN8    | -1.184247  |
| CLNS1A  | -0.69873   |
| CLP1    | -1.4165573 |
| CLPB    | -2.1785336 |
| CLPP    | -1.8109379 |
| CLPTM1  | -2.336124  |
| CLPTM1L | -0.6630378 |
| CLPX    | -3.5161676 |
| CLRN1   | -0.9296043 |
| CLRN2   | -1.638757  |
| CLSTN3  | -2.6834795 |
| CLTA    | -0.4676895 |
| CLTC    | -0.5643807 |
| CLU     | -1.9247456 |
| CLUAP1  | -0.3290482 |
| CLUH    | -3.2998862 |
| CLVS1   | -1.1653681 |
| CLYBL   | -4.042873  |
| CMAH    | -1.5243807 |
| CMAS    | -0.6935935 |
| CMBL    | -5.9034915 |
| CMC1    | -1.7194748 |
| CMC2    | -2.3883572 |
| CML1    | -6.95284   |
| CML2    | -6.1057997 |
| CML5    | -2.51935   |
| CMPK1   | -0.5341339 |
| CMSS1   | -0.7402511 |
| CMTM4   | -0.6555109 |
| CMTM8   | -3.0922694 |
| CNBD1   | -1.7518604 |
| CNBP    | -0.648314  |
| CNDP1   | -1.4408381 |
| CNDP2   | -0.6624155 |
| CNGA1   | -1.319565  |
| CNGA3   | -0.9648953 |
| CNGA4   | -1.142199  |
| CNGB3   | -1.8321297 |
| CNIH1   | -1.6284518 |
| CNIH3   | -3.0252717 |
| CNN3    | -0.4200878 |
| CNNM1   | -2.1344707 |

|          |            |
|----------|------------|
| CNNM2    | -0.2614212 |
| CNNM3    | -1.4960732 |
| CNOT1    | -0.9610782 |
| CNOT10   | -0.5304956 |
| CNOT3    | -1.2142007 |
| CNOT6L   | -0.2289085 |
| CNOT7    | -0.1678333 |
| CNOT8    | -1.1926379 |
| CNP      | -1.3255839 |
| CNPY1    | -1.7221675 |
| CNPY2    | -2.2558155 |
| CNPY3    | -1.2583795 |
| CNR2     | -0.2816467 |
| CNST     | -0.6247788 |
| CNTD1    | -1.6285481 |
| CNTN2    | -2.8582015 |
| CNTN6    | -3.3383522 |
| CNTNAP1  | -1.3899043 |
| CNTNAP2  | -1.6531689 |
| CNTNAP3  | -1.7041585 |
| CNTNAP5B | -1.8747439 |
| CNTROB   | -1.7276285 |
| COA3     | -1.7343502 |
| COA4     | -1.9080672 |
| COA5     | -1.0974298 |
| COA6     | -2.913981  |
| COA7     | -2.3152406 |
| COASY    | -2.963027  |
| COBL     | -0.8194394 |
| COBLL1   | -1.0784497 |
| COCH     | -0.9283822 |
| COG1     | -0.2597928 |
| COG2     | -0.9514337 |
| COG4     | -1.7404261 |
| COG6     | -0.7097693 |
| COG8     | -1.2396502 |
| COIL     | -0.4819632 |
| COL11A1  | -1.171967  |
| COL11A2  | -0.2618089 |
| COL14A1  | -3.9313476 |
| COL15A1  | -0.6734815 |
| COL18A1  | -4.6547546 |
| COL20A1  | -1.012222  |
| COL24A1  | -0.9932127 |
| COL25A1  | -1.737289  |

|          |            |
|----------|------------|
| COL27A1  | -1.8141141 |
| COL28A1  | -2.1777315 |
| COL2A1   | -0.8563361 |
| COL3A1   | -0.6125345 |
| COL5A1   | -1.1983514 |
| COL5A3   | -2.4891067 |
| COL6A3   | -0.7623615 |
| COL6A4   | -1.1084769 |
| COL6A5   | -1.7287531 |
| COL6A6   | -1.3336627 |
| COL9A1   | -0.8154461 |
| COLEC10  | -7.796467  |
| COLEC11  | -9.058813  |
| COLEC12  | -1.5519145 |
| COMMD1   | -2.053761  |
| COMMD2   | -1.5799565 |
| COMMD3   | -2.3764482 |
| COMMD4   | -1.0586529 |
| COMMD5   | -1.8602829 |
| COMMD6   | -1.6160531 |
| COMMD7   | -0.5066395 |
| COMMD8   | -0.320179  |
| COMMD9   | -2.1214561 |
| COMT     | -3.6466455 |
| COMTD1   | -1.1090803 |
| COPA     | -0.6180863 |
| COPB1    | -0.7541165 |
| COPB2    | -0.7948895 |
| COPE     | -1.5421314 |
| COPG2    | -1.1101627 |
| COPG2OS2 | -1.2420747 |
| COPRS    | -0.6563568 |
| COPS2    | -0.3924031 |
| COPS3    | -1.2709718 |
| COPS5    | -1.1495261 |
| COPS6    | -2.1152945 |
| COPS7A   | -1.0291257 |
| COPS7B   | -1.5966709 |
| COPZ1    | -1.3942065 |
| COPZ2    | -3.1907642 |
| COQ10A   | -1.3796234 |
| COQ2     | -1.378408  |
| COQ3     | -1.1206198 |
| COQ4     | -2.149498  |
| COQ5     | -1.5140963 |

|         |            |
|---------|------------|
| COQ6    | -1.7541761 |
| COQ7    | -1.9570937 |
| COQ9    | -3.3064742 |
| CORIN   | -1.2566738 |
| CORO1B  | -1.0146918 |
| CORO7   | -0.9137135 |
| COX1    | -1.2160263 |
| COX11   | -1.3752732 |
| COX14   | -0.8018704 |
| COX15   | -1.0021753 |
| COX16   | -1.6266651 |
| COX17   | -1.4946494 |
| COX18   | -1.2587562 |
| COX19   | -1.818593  |
| COX2    | -0.9920006 |
| COX20   | -1.7564011 |
| COX3    | -1.1202073 |
| COX4I1  | -1.5482597 |
| COX5A   | -1.7663918 |
| COX5B   | -1.297554  |
| COX6A1  | -1.7094736 |
| COX6B1  | -1.4787378 |
| COX6B2  | -0.2067432 |
| COX6C   | -1.7160263 |
| COX7A2  | -1.9038534 |
| COX7A2L | -1.3800306 |
| COX7B   | -2.0241165 |
| COX7C   | -1.7399206 |
| COX8A   | -1.4333072 |
| CP      | -1.675426  |
| CPA1    | -2.0824137 |
| CPA2    | -0.6594923 |
| CPA6    | -1.2222648 |
| CPB2    | -2.886948  |
| CPEB2   | -0.5977445 |
| CPEB3   | -1.3241534 |
| CPED1   | -0.5777204 |
| CPHX1   | -3.0083299 |
| CPLX2   | -1.6821346 |
| CPLX4   | -0.8941526 |
| CPN1    | -4.952672  |
| CPN2    | -6.7637987 |
| CPNE3   | -0.6451445 |
| CPNE4   | -2.6569593 |
| CPNE9   | -2.3762133 |

|         |            |
|---------|------------|
| CPOX    | -4.3727484 |
| CPPED1  | -2.932703  |
| CPQ     | -2.8076963 |
| CPS1    | -6.1775727 |
| CPSF1   | -1.3306432 |
| CPSF3   | -0.8574901 |
| CPSF3L  | -1.1557784 |
| CPSF4   | -1.3033342 |
| CPSF4L  | -4.242785  |
| CPT1A   | -2.5521364 |
| CPT2    | -3.440208  |
| CPVL    | -2.241803  |
| CPXCR1  | -3.8073533 |
| CPZ     | -0.5039394 |
| CR2     | -0.8204019 |
| CRADD   | -1.3784785 |
| CRAT    | -0.4435904 |
| CRB3    | -0.8871088 |
| CRBN    | -0.5760274 |
| CRCP    | -1.3191929 |
| CREB3L3 | -4.2809844 |
| CREB5   | -1.1339779 |
| CREBBP  | -0.8321123 |
| CREBZF  | -0.5599928 |
| CREG1   | -2.3379622 |
| CRELD1  | -2.004939  |
| CRHBP   | -1.576683  |
| CRISP4  | -1.6714582 |
| CRLS1   | -2.8904362 |
| CRNN    | -3.0926595 |
| CROCC   | -1.4528837 |
| CROT    | -5.2019815 |
| CRP     | -4.8669586 |
| CRTAP   | -0.5536246 |
| CRTC1   | -0.7430458 |
| CRTC2   | -0.2606034 |
| CRYBA1  | -1.2016687 |
| CRYBA4  | -1.9092953 |
| CRYBB1  | -1.8094962 |
| CRYBB2  | -1.6683545 |
| CRYGA   | -1.2713871 |
| CRYGC   | -0.9912899 |
| CRYGF   | -1.8418729 |
| CRYGN   | -3.3059735 |
| CRYGS   | -2.394049  |



|          |            |
|----------|------------|
| CRYL1    | -1.4998856 |
| CRYM     | -2.9061894 |
| CRYZ     | -4.4288583 |
| CSAD     | -2.5304356 |
| CSDE1    | -0.5732398 |
| CSE1L    | -0.6110048 |
| CSF1R    | -1.6737852 |
| CSK      | -1.4345317 |
| CSL      | -2.0327516 |
| CSMD2    | -2.4149265 |
| CSMD3    | -2.0946724 |
| CSN1S1   | -1.7628238 |
| CSN1S2A  | -1.7277563 |
| CSN1S2B  | -1.6930199 |
| CSN2     | -2.9125679 |
| CSN3     | -1.4456766 |
| CSNK1G2  | -1.1676502 |
| CSNK2A1  | -0.9616704 |
| CSNK2A2  | -0.6104879 |
| CSNK2B   | -1.0492702 |
| CSPP1    | -0.516628  |
| CSPRS    | -0.3308759 |
| CSRNP2   | -0.9777601 |
| CSRP2    | -1.3163376 |
| CSRP2BP  | -0.8663044 |
| CSRP3    | -2.874599  |
| CST11    | -1.5911603 |
| CST9     | -1.5926826 |
| CSTF1    | -0.9116778 |
| CSTF2T   | -0.881844  |
| CSTF3    | -0.3870502 |
| CSTL1    | -1.6248372 |
| CTAGE5   | -1.940691  |
| CTC1     | -1.0508604 |
| CTCFL    | -3.8375113 |
| CTCFLOS  | -1.8985143 |
| CTDNEP1  | -0.4625578 |
| CTDSP1   | -0.7251892 |
| CTDSP2   | -0.4367938 |
| CTF1     | -2.6684613 |
| CTF2     | -1.8932946 |
| CTH      | -6.336088  |
| CTIF     | -2.0794506 |
| CTNNA2   | -1.9329596 |
| CTNNBIP1 | -1.2098737 |

|          |            |
|----------|------------|
| CTNS     | -1.2371764 |
| CTR9     | -0.3441453 |
| CTRB1    | -2.7818635 |
| CTS6     | -1.2403166 |
| CTS7     | -1.0329804 |
| CTSA     | -1.0057526 |
| CTSB     | -0.9400768 |
| CTSC     | -0.6685591 |
| CTSD     | -0.6026707 |
| CTSE     | -2.5387154 |
| CTSF     | -2.7870731 |
| CTSG     | -1.7255859 |
| CTSH     | -1.1085153 |
| CTSJ     | -1.5758865 |
| CTSL     | -1.6545544 |
| CTSM     | -0.5782819 |
| CTSO     | -0.7087777 |
| CTSQ     | -2.3648293 |
| CTSW     | -1.1270361 |
| CTSZ     | -1.3296423 |
| CTTN     | -0.3066263 |
| CTTNBP2  | -1.0035689 |
| CTU1     | -0.8281999 |
| CTU2     | -0.4993334 |
| CUEDC2   | -0.1842217 |
| CUL2     | -0.5553594 |
| CUL4A    | -1.0779519 |
| CUL4B    | -0.3606267 |
| CUL5     | -0.2638784 |
| CUL9     | -1.1327205 |
| CUTA     | -0.4741678 |
| CUTAL    | -2.8101196 |
| CUTC     | -2.0545254 |
| CUX2     | -3.4566054 |
| CWC15    | -0.3402495 |
| CWF19L1  | -2.2490485 |
| CWF19L2  | -0.19379   |
| CXADR    | -1.6175733 |
| CXCL11   | -0.4411883 |
| CXCL12   | -3.320075  |
| CXCR6    | -0.2364526 |
| CXXC1    | -0.5683899 |
| CXXC5    | -3.919864  |
| CYB561A3 | -0.9595218 |
| CYB561D1 | -0.3132186 |

|          |            |
|----------|------------|
| CYB561D2 | -1.3946643 |
| CYB5A    | -2.9001784 |
| CYB5B    | -2.9247441 |
| CYB5D1   | -0.3379486 |
| CYB5D2   | -2.1676784 |
| CYB5R3   | -2.7377434 |
| CYB5RL   | -2.6956775 |
| CYC1     | -2.5470033 |
| CYCS     | -0.8484564 |
| CYCT     | -1.0182154 |
| CYHR1    | -1.9086156 |
| CYLC1    | -2.2107139 |
| CYLC2    | -2.773659  |
| CYM      | -1.0194781 |
| CYP11A1  | -1.2349062 |
| CYP11B2  | -2.2083507 |
| CYP17A1  | -0.9617806 |
| CYP1A1   | -2.6043615 |
| CYP1A2   | -9.208015  |
| CYP20A1  | -0.553395  |
| CYP21A1  | -1.8347011 |
| CYP24A1  | -1.6951194 |
| CYP26A1  | -4.8709207 |
| CYP26B1  | -2.040852  |
| CYP26C1  | -3.7195764 |
| CYP27A1  | -5.764388  |
| CYP2A12  | -6.4432926 |
| CYP2A22  | -7.7129908 |
| CYP2A4   | -5.8693795 |
| CYP2B13  | -10.1465   |
| CYP2B19  | -1.4683905 |
| CYP2B23  | -1.0999694 |
| CYP2B9   | -2.6060538 |
| CYP2C29  | -8.666621  |
| CYP2C37  | -9.003267  |
| CYP2C38  | -8.51778   |
| CYP2C39  | -8.840243  |
| CYP2C44  | -10.245741 |
| CYP2C50  | -9.413102  |
| CYP2C54  | -8.796754  |
| CYP2C55  | -6.7355294 |
| CYP2C67  | -10.34764  |
| CYP2C68  | -10.36334  |
| CYP2C70  | -6.572914  |
| CYP2D10  | -5.4644628 |

|            |            |
|------------|------------|
| CYP2D11    | -6.2537985 |
| CYP2D12    | -6.410355  |
| CYP2D13    | -7.112501  |
| CYP2D22    | -6.1951246 |
| CYP2D26    | -6.0651455 |
| CYP2D34    | -5.9771805 |
| CYP2D37-PS | -7.933751  |
| CYP2D40    | -8.80895   |
| CYP2D9     | -6.4779944 |
| CYP2E1     | -6.4041286 |
| CYP2F2     | -0.838922  |
| CYP2G1     | -7.849597  |
| CYP2J13    | -4.1550617 |
| CYP2J5     | -4.2692013 |
| CYP2J6     | -3.4901521 |
| CYP2J8     | -5.578669  |
| CYP2J9     | -2.4631987 |
| CYP2R1     | -4.1604247 |
| CYP2T4     | -0.4512208 |
| CYP2U1     | -0.8772502 |
| CYP2W1     | -1.297801  |
| CYP39A1    | -2.3989596 |
| CYP3A11    | -8.156159  |
| CYP3A13    | -4.550012  |
| CYP3A16    | -7.968198  |
| CYP3A25    | -10.318481 |
| CYP3A41B   | -8.008171  |
| CYP3A44    | -11.271824 |
| CYP3A57    | -10.3561   |
| CYP3A59    | -8.669407  |
| CYP46A1    | -0.4313772 |
| CYP4A10    | -9.778972  |
| CYP4A12A   | -1.7769713 |
| CYP4A12B   | -1.1878338 |
| CYP4A14    | -10.958382 |
| CYP4A31    | -9.558351  |
| CYP4A32    | -9.414268  |
| CYP4F13    | -2.9327621 |
| CYP4F14    | -8.399601  |
| CYP4F15    | -5.9423018 |
| CYP4F16    | -1.3676319 |
| CYP4F17    | -3.0890536 |
| CYP4F40    | -1.7637768 |
| CYP4V3     | -3.4838243 |
| CYP51      | -3.5073812 |

|          |            |
|----------|------------|
| CYP7A1   | -10.199405 |
| CYP7B1   | -1.0791755 |
| CYP8B1   | -7.695426  |
| CYPT10   | -1.4207239 |
| CYPT14   | -3.4625857 |
| CYPT2    | -1.207643  |
| CYPT9    | -1.5360434 |
| CYS1     | -1.1301432 |
| CYSLTR1  | -0.2180095 |
| CYSLTR2  | -0.5897908 |
| CYTB     | -1.3913078 |
| CYTH1    | -0.14817   |
| DAB1     | -0.9696615 |
| DACH2    | -2.0208006 |
| DACT2    | -4.0101767 |
| DAD1     | -1.1893706 |
| DAGLB    | -1.6735435 |
| DAK      | -5.903858  |
| DALRD3   | -1.0283859 |
| DAND5    | -1.3398764 |
| DAP      | -2.8301048 |
| DAP3     | -1.3276749 |
| DAPK1    | -0.3688269 |
| DAPK2    | -1.7390409 |
| DARS     | -0.915935  |
| DARS2    | -2.395175  |
| DBHOS    | -1.1033454 |
| DBI      | -3.1820002 |
| DBIL5    | -1.8574929 |
| DBNDD2   | -0.457511  |
| DBP      | -3.7175517 |
| DBR1     | -0.6724968 |
| DBT      | -2.8727558 |
| DCAF11   | -2.4833236 |
| DCAF12L1 | -2.9186664 |
| DCAF17   | -0.9780119 |
| DCAF4    | -1.3487496 |
| DCAF5    | -0.5303359 |
| DCAF6    | -0.5072956 |
| DCAF7    | -0.3364978 |
| DCAF8    | -1.223969  |
| DCAKD    | -1.5869069 |
| DCDC2A   | -1.7168307 |
| DCHS1    | -0.712738  |
| DCLK3    | -6.610832  |

|         |            |
|---------|------------|
| DCLRE1A | -2.1090472 |
| DCPP3   | -1.2690823 |
| DCPS    | -0.5378914 |
| DCST2   | -1.596091  |
| DCT     | -8.200916  |
| DCTN2   | -1.2968879 |
| DCTN3   | -0.699398  |
| DCTN5   | -0.6251807 |
| DCTPP1  | -2.707952  |
| DCUN1D1 | -0.4766092 |
| DCUN1D2 | -0.9548397 |
| DCUN1D4 | -1.703342  |
| DCXR    | -3.1169553 |
| DDAH1   | -3.4863272 |
| DDB1    | -0.9557228 |
| DDB2    | -0.8316536 |
| DDC     | -5.7532854 |
| DDHD1   | -0.5990479 |
| DDHD2   | -0.5223038 |
| DDI1    | -1.660522  |
| DDI2    | -1.6463728 |
| DDIT4L  | -2.3230476 |
| DDO     | -2.5124094 |
| DDOST   | -0.3027778 |
| DDRGK1  | -1.7670422 |
| DDT     | -4.376769  |
| DDX1    | -0.7010541 |
| DDX18   | -0.2143269 |
| DDX19A  | -0.8181915 |
| DDX19B  | -0.1550312 |
| DDX27   | -0.1559968 |
| DDX28   | -0.9778857 |
| DDX31   | -0.2729588 |
| DDX3Y   | -1.7818484 |
| DDX41   | -1.4773436 |
| DDX42   | -0.2083559 |
| DDX47   | -0.5185437 |
| DDX49   | -0.3260961 |
| DDX51   | -0.6104722 |
| DDX54   | -0.2408314 |
| DDX56   | -1.3781219 |
| DDX60   | -1.622843  |
| DEAF1   | -1.261342  |
| DEAR1   | -1.3861179 |
| DEB1    | -2.3470855 |

|           |            |
|-----------|------------|
| DECR1     | -3.4257994 |
| DECR2     | -4.46141   |
| DEF8      | -2.4230876 |
| DEFA1     | -1.676867  |
| DEFA10    | -1.8369348 |
| DEFA2     | -2.035478  |
| DEFA21    | -2.6177454 |
| DEFA23    | -1.3154442 |
| DEFA3     | -1.7910342 |
| DEFA-PS13 | -1.6006045 |
| DEFA-RS10 | -0.2083905 |
| DEFA-RS2  | -1.4602234 |
| DEFA-RS4  | -0.892848  |
| DEFA-RS7  | -0.9057295 |
| DEFB11    | -1.7049313 |
| DEFB15    | -1.9110625 |
| DEFB19    | -1.5589824 |
| DEFB20    | -2.0207903 |
| DEFB21    | -3.802979  |
| DEFB22    | -1.0180979 |
| DEFB25    | -0.7242794 |
| DEFB26    | -4.235504  |
| DEFB28    | -2.2499108 |
| DEFB30    | -0.6399801 |
| DEFB33    | -0.6215172 |
| DEFB34    | -2.7100065 |
| DEFB35    | -1.589664  |
| DEFB36    | -2.206946  |
| DEFB38    | -1.6047251 |
| DEFB40    | -1.5734017 |
| DEFB41    | -0.9921248 |
| DEFB42    | -0.8944376 |
| DEFB43    | -1.5847931 |
| DEFB44-PS | -1.6411612 |
| DEFB47    | -1.057919  |
| DEFB6     | -2.501064  |
| DEFB9     | -1.4091456 |
| DEGS1     | -0.7332044 |
| DENND1A   | -0.9032333 |
| DENND2C   | -0.4229715 |
| DENND2D   | -0.362042  |
| DENND4A   | -0.9872108 |
| DENND5B   | -0.5615768 |
| DENND6A   | -0.8616934 |
| DENND6B   | -1.903419  |

|         |            |
|---------|------------|
| DENR    | -0.5596051 |
| DEPDC1A | -0.5842624 |
| DEPDC1B | -0.2258868 |
| DEPDC5  | -0.3244157 |
| DEPDC7  | -4.4701395 |
| DEPTOR  | -1.881505  |
| DERA    | -3.1273513 |
| DERL1   | -1.320251  |
| DERL2   | -1.7352319 |
| DERL3   | -0.2807879 |
| DESI1   | -0.9856606 |
| DESI2   | -1.3244686 |
| DET1    | -2.6378207 |
| DEXI    | -1.8201246 |
| DFFA    | -0.5002849 |
| DFNA5   | -2.2664583 |
| DFNB59  | -1.1900978 |
| DGAT1   | -0.8741994 |
| DGAT2   | -4.277229  |
| DGCR2   | -1.0148139 |
| DGCR6   | -2.4424405 |
| DGKB    | -1.1975591 |
| DGKQ    | -1.3638878 |
| DGKZ    | -1.1957498 |
| DGUOK   | -1.2021747 |
| DHCR24  | -5.7844815 |
| DHCR7   | -5.280242  |
| DHDDS   | -0.7073822 |
| DHDH    | -4.4506664 |
| DHFR    | -3.2884007 |
| DHODH   | -1.4271927 |
| DHRS1   | -3.1649942 |
| DHRS11  | -3.5225906 |
| DHRS13  | -1.434403  |
| DHRS2   | -1.7416036 |
| DHRS3   | -1.2759223 |
| DHRS4   | -3.1976619 |
| DHRS7   | -2.0382195 |
| DHRS7B  | -2.033256  |
| DHRSX   | -0.803977  |
| DHTKD1  | -4.39072   |
| DHX16   | -1.0479193 |
| DHX32   | -0.8852005 |
| DHX33   | -0.4726157 |
| DHX34   | -0.7792826 |



|         |            |
|---------|------------|
| DHX35   | -0.4263625 |
| DHX36   | -0.8494878 |
| DHX37   | -1.1656563 |
| DHX57   | -0.8074508 |
| DHX58   | -0.2310143 |
| DIABLO  | -0.9347425 |
| DICER1  | -0.9871078 |
| DIDO1   | -0.4025111 |
| DIO1    | -6.8035274 |
| DIO3    | -1.7224    |
| DIO3OS  | -3.0199342 |
| DIP2C   | -0.7249227 |
| DIRAS1  | -1.8964579 |
| DIS3L   | -0.685091  |
| DIS3L2  | -1.1231785 |
| DISC1   | -2.6634545 |
| DISP1   | -1.2983642 |
| DIXDC1  | -1.9314129 |
| DKC1    | -0.4845467 |
| DKK4    | -2.9475307 |
| DLAT    | -0.5298958 |
| DLD     | -1.547174  |
| DLEC1   | -0.7443242 |
| DLEU2   | -1.6978726 |
| DLEU7   | -1.6079586 |
| DLG3    | -0.8281226 |
| DLGAP2  | -1.207576  |
| DLGAP5  | -1.6046166 |
| DLK2    | -0.8499596 |
| DLL3    | -0.3507533 |
| DLST    | -1.3503351 |
| DLX1    | -1.9668796 |
| DLX2    | -1.6600375 |
| DLX3    | -0.556973  |
| DLX6AS2 | -0.9577265 |
| DMAP1   | -0.5899701 |
| DMBX1   | -1.6847501 |
| DMC1    | -1.1731119 |
| DMGDH   | -5.593385  |
| DMPK    | -3.3960614 |
| DMRTB1  | -0.7992976 |
| DMRTC1B | -1.014384  |
| DMRTC2  | -1.7154987 |
| DMTN    | -0.6432328 |
| DMWD    | -0.3528585 |

|          |            |
|----------|------------|
| DNA2     | -1.0834217 |
| DNAAF1   | -1.0117424 |
| DNAH1    | -1.1400683 |
| DNAH3    | -1.6421084 |
| DNAIC1   | -1.854166  |
| DNAJA1   | -2.1247115 |
| DNAJA2   | -1.1340141 |
| DNAJA3   | -2.658451  |
| DNAJB12  | -1.8107696 |
| DNAJB14  | -0.4004159 |
| DNAJB2   | -1.0914941 |
| DNAJB8   | -1.2816508 |
| DNAJC11  | -1.5331514 |
| DNAJC12  | -2.3212342 |
| DNAJC15  | -1.6986022 |
| DNAJC16  | -1.2297044 |
| DNAJC19  | -1.1384335 |
| DNAJC22  | -4.613846  |
| DNAJC24  | -0.2448907 |
| DNAJC25  | -2.3322477 |
| DNAJC28  | -0.622262  |
| DNAJC30  | -1.6523752 |
| DNAJC4   | -1.5674481 |
| DNAJC5G  | -1.5954621 |
| DNAJC6   | -1.4770722 |
| DNAL1    | -1.4741001 |
| DNASE1L3 | -3.6095014 |
| DNASE2B  | -4.3749323 |
| DND1     | -0.4824445 |
| DNER     | -1.7814987 |
| DNLZ     | -1.9862766 |
| DNM1L    | -0.5725699 |
| DNMBP    | -1.5261252 |
| DNMT3A   | -0.7714419 |
| DNMT3B   | -1.772716  |
| DNPEP    | -0.9776983 |
| DNPH1    | -3.5006542 |
| DNTT     | -5.7765913 |
| DOC2A    | -0.5448501 |
| DOC2G    | -0.484576  |
| DOCK3    | -1.1127114 |
| DOCK4    | -0.4652104 |
| DOCK6    | -0.8336363 |
| DOCK8    | -0.2006688 |
| DOHH     | -0.6914678 |

|         |            |
|---------|------------|
| DOLK    | -1.4027095 |
| DOLPP1  | -1.203104  |
| DOPEY2  | -0.7275906 |
| DOS     | -1.0767145 |
| DOT1L   | -0.2913566 |
| DPAGT1  | -1.1295037 |
| DPCD    | -0.7789388 |
| DPEP3   | -1.3008404 |
| DPF1    | -1.4760537 |
| DPF2    | -0.2251391 |
| DPF3    | -3.4738576 |
| DPH1    | -1.5731845 |
| DPH3    | -0.1502633 |
| DPH7    | -0.5018182 |
| DPM1    | -1.4465623 |
| DPM2    | -0.7703829 |
| DPM3    | -1.7947764 |
| DPP3    | -1.466394  |
| DPP4    | -3.6613803 |
| DPP7    | -2.235447  |
| DPP9    | -0.5481057 |
| DPPA1   | -2.4240208 |
| DPPA3   | -1.0603738 |
| DPPA4   | -0.6661048 |
| DPPA5A  | -1.6280615 |
| DPY19L1 | -1.0697412 |
| DPY19L2 | -1.3284678 |
| DPY19L3 | -0.5746946 |
| DPY30   | -0.9673338 |
| DPYD    | -6.079564  |
| DPYS    | -8.715271  |
| DPYSL4  | -1.827326  |
| DPYSL5  | -0.8164139 |
| DQX1    | -2.9111347 |
| DRAM2   | -0.7787175 |
| DRAXIN  | -2.9197364 |
| DRD4    | -2.6645927 |
| DRG1    | -0.7688246 |
| DRG2    | -1.6961107 |
| DSC2    | -3.2466464 |
| DSC3    | -1.9069228 |
| DSCR3   | -0.7724972 |
| DSE     | -0.8035948 |
| DSG1B   | -1.4695477 |
| DSG1C   | -0.8656583 |

|            |            |
|------------|------------|
| DSG2       | -2.5495608 |
| DSP        | -0.5529528 |
| DSPP       | -1.2533464 |
| DTD1       | -1.0806613 |
| DTD2       | -2.1351836 |
| DTNBP1     | -0.9714789 |
| DTWD1      | -1.342833  |
| DTWD2      | -1.0431223 |
| DUOX2      | -0.9144459 |
| DUS1L      | -1.8191485 |
| DUS2       | -1.3568668 |
| DUS3L      | -0.3293104 |
| DUS4L      | -0.8203361 |
| DUSP12     | -0.7054377 |
| DUSP15     | -2.6236465 |
| DUSP19     | -1.995969  |
| DUSP22     | -2.1590838 |
| DUSP23     | -0.5902884 |
| DUSP28     | -1.761487  |
| DUSP3      | -0.3045588 |
| DUSP6      | -0.2935066 |
| DUSP9      | -0.7945201 |
| DUT        | -0.8447635 |
| DUX        | -1.4587066 |
| DUXBL1     | -1.0487761 |
| DUXBL2     | -0.9769535 |
| DVL1       | -1.8104148 |
| DVL2       | -1.1325076 |
| DXERTD223E | -0.3388426 |
| DXO        | -1.1070151 |
| DYDC1      | -0.9015272 |
| DYM        | -0.7220869 |
| DYNC1I1    | -0.5605171 |
| DYNLL2     | -2.6843805 |
| DYNLRB1    | -1.1272435 |
| DYNLT3     | -0.388515  |
| DYRK1B     | -1.382338  |
| DYRK2      | -0.9367275 |
| DYRK4      | -1.631757  |
| DZIP3      | -0.7875478 |
| E2F1       | -1.3958883 |
| E2F3       | -0.9819365 |
| E2F6       | -1.0907068 |
| E2F8       | -1.0579407 |
| EAF1       | -0.43782   |

|         |            |
|---------|------------|
| EAF2    | -0.5210905 |
| EAPP    | -0.3163996 |
| EAR4    | -2.4036036 |
| EAR7    | -0.2789137 |
| EARS2   | -2.1464357 |
| EBAG9   | -1.0947547 |
| EBP     | -3.2825365 |
| EBPL    | -5.23264   |
| ECD     | -1.2377672 |
| ECE1    | -0.2083583 |
| ECE2    | -1.4450164 |
| ECH1    | -3.5407677 |
| ECHDC1  | -1.0725834 |
| ECHDC2  | -3.3682885 |
| ECHDC3  | -6.4591494 |
| ECHS1   | -3.0576773 |
| ECI1    | -3.2999325 |
| ECI2    | -2.555214  |
| ECI3    | -2.7585583 |
| ECM1    | -0.393343  |
| ECSIT   | -1.1222119 |
| ECT2    | -1.5233035 |
| EDA     | -1.1303144 |
| EDA2R   | -1.54879   |
| EDARADD | -1.0536268 |
| EDC3    | -0.5069621 |
| EDC4    | -0.1598992 |
| EDDM3B  | -1.581368  |
| EDEM1   | -1.8993802 |
| EDEM2   | -0.8004713 |
| EDEM3   | -0.3225503 |
| EDF1    | -1.8319302 |
| EDNRB   | -1.8620381 |
| EDRF1   | -0.3268137 |
| EEF1A1  | -1.2973361 |
| EEF1B2  | -0.928134  |
| EEF1D   | -0.8496208 |
| EEF1G   | -0.5927844 |
| EEF2    | -1.3829598 |
| EEF2K   | -0.2070012 |
| EEFSEC  | -2.3171654 |
| EEPD1   | -1.5296948 |
| EFCAB11 | -0.7273068 |
| EFCAB3  | -1.3354654 |
| EFCAB8  | -1.2856746 |

|         |            |
|---------|------------|
| EFCAB9  | -1.0415249 |
| EFCC1   | -0.8575921 |
| EFNA1   | -1.0443654 |
| EFNA2   | -0.9310451 |
| EFR3A   | -0.842495  |
| EGF     | -0.8481238 |
| EGFEM1  | -2.115844  |
| EGFLAM  | -2.0098097 |
| EGFR    | -1.9478359 |
| EGLN1   | -0.5510752 |
| EGLN2   | -0.2557707 |
| EGLN3   | -0.5204458 |
| EHBP1   | -0.2969379 |
| EHD3    | -3.9182177 |
| EHHADH  | -6.994393  |
| EHMT1   | -0.1852441 |
| EHMT2   | -0.6644869 |
| EI24    | -2.3649917 |
| EID2B   | -1.1249177 |
| EIF1A   | -0.3817635 |
| EIF1AD  | -0.4768639 |
| EIF1B   | -0.333539  |
| EIF1-PS | -0.9706907 |
| EIF2A   | -0.5014958 |
| EIF2AK1 | -0.8289924 |
| EIF2B1  | -1.5778747 |
| EIF2B4  | -1.4432001 |
| EIF2B5  | -0.8126621 |
| EIF2D   | -2.1383853 |
| EIF2S1  | -0.1999769 |
| EIF2S3X | -0.6434827 |
| EIF2S3Y | -1.7295148 |
| EIF3A   | -0.5876546 |
| EIF3D   | -0.2418928 |
| EIF3E   | -0.1659827 |
| EIF3F   | -0.5996118 |
| EIF3G   | -0.3163934 |
| EIF3H   | -0.4779863 |
| EIF3I   | -1.3717299 |
| EIF3J1  | -0.4532466 |
| EIF3K   | -0.3539972 |
| EIF3L   | -0.6810904 |
| EIF3M   | -0.4592271 |
| EIF4A3  | -0.256393  |
| EIF4B   | -0.6426454 |

|          |            |
|----------|------------|
| EIF4E    | -0.4703555 |
| EIF4E1B  | -2.0025375 |
| EIF4E2   | -0.9537339 |
| EIF4E3   | -0.4354453 |
| EIF4EBP1 | -0.7562389 |
| EIF4EBP2 | -1.6378198 |
| EIF4EBP3 | -0.8729935 |
| EIF4G1   | -1.3010726 |
| EIF4H    | -0.1945829 |
| EIF5A    | -1.1672153 |
| EIF5B    | -0.443974  |
| EIF6     | -0.757782  |
| ELAC1    | -0.5207949 |
| ELAC2    | -1.1775193 |
| ELAVL3   | -2.1886318 |
| ELFN1    | -1.2898593 |
| ELFN2    | -1.0439444 |
| ELK1     | -0.5819035 |
| ELK3     | -0.3294492 |
| ELL      | -0.2761798 |
| ELL2     | -0.4864364 |
| ELL3     | -3.230442  |
| ELMO3    | -1.583971  |
| ELMOD2   | -0.5566635 |
| ELMOD3   | -1.3485098 |
| ELOF1    | -0.5426536 |
| ELOVL2   | -5.52707   |
| ELOVL5   | -3.3174505 |
| ELOVL6   | -3.9552107 |
| ELP2     | -0.3962064 |
| ELP3     | -0.7408042 |
| ELP4     | -1.0503182 |
| ELP5     | -0.5647473 |
| ELP6     | -1.0996411 |
| ELTD1    | -0.7504261 |
| EMC1     | -0.3513999 |
| EMC10    | -1.9483905 |
| EMC2     | -0.3763738 |
| EMC3     | -1.3517737 |
| EMC4     | -0.7706084 |
| EMC6     | -1.5121994 |
| EMC7     | -1.4902601 |
| EMC8     | -1.3210068 |
| EMC9     | -3.4191918 |
| EME1     | -0.5727799 |

|           |            |
|-----------|------------|
| EME2      | -1.370975  |
| EMG1      | -0.9149752 |
| EMILIN1   | -0.4307113 |
| EMILIN3   | -1.3184597 |
| EML3      | -0.4751916 |
| EML4      | -0.3804212 |
| EMR1      | -0.8667159 |
| EMR4      | -1.913547  |
| EMX1      | -2.6074128 |
| EMX2      | -1.5090532 |
| EMX2OS    | -1.2049844 |
| EN2       | -1.2788103 |
| ENAM      | -1.757086  |
| ENDOG     | -2.589892  |
| ENDOV     | -0.4922919 |
| ENGASE    | -1.6272097 |
| ENHO      | -3.5042653 |
| ENO1      | -1.6615615 |
| ENO1B     | -1.7582293 |
| ENOX1     | -1.160366  |
| ENOX2     | -1.166894  |
| ENPEP     | -3.176599  |
| ENPP1     | -1.8475158 |
| ENPP2     | -1.8514776 |
| ENPP3     | -2.1563528 |
| ENPP5     | -1.2988825 |
| ENSA      | -0.5324187 |
| ENTHD1    | -1.734025  |
| ENTHD2    | -1.2458587 |
| ENTPD2    | -1.6224623 |
| ENTPD4    | -0.8170171 |
| ENTPD5    | -3.333005  |
| ENTPD6    | -2.4665978 |
| ENTPD7    | -0.9524224 |
| ENTPD8    | -8.564732  |
| ENY2      | -1.4222865 |
| EPB4.1    | -0.4439001 |
| EPB4.1L3  | -1.2938333 |
| EPB4.1L4B | -2.553402  |
| EPB4.1L5  | -1.1186111 |
| EPB4.2    | -1.6849971 |
| EPG5      | -1.0076814 |
| EPHA1     | -4.0408154 |
| EPHA10    | -1.3599625 |
| EPHA5     | -0.816484  |



|          |            |
|----------|------------|
| EPHA6    | -1.2387385 |
| EPHA7    | -0.8188951 |
| EPHB2    | -0.6115327 |
| EPHB3    | -0.5233169 |
| EPHB4    | -1.2394176 |
| EPHB6    | -1.0929375 |
| EPHX1    | -4.1515384 |
| EPHX2    | -6.693139  |
| EPHX3    | -0.8787463 |
| EPM2A    | -0.4429414 |
| EPM2AIP1 | -0.7702794 |
| EPN1     | -1.6463223 |
| EPOR     | -3.0292907 |
| EPRS     | -0.5930872 |
| EPS8L2   | -1.3169122 |
| EPSTI1   | -0.475158  |
| EPT1     | -2.4953275 |
| EPX      | -5.165098  |
| EPYC     | -1.1147618 |
| ERAL1    | -1.533812  |
| ERAP1    | -1.4988537 |
| ERAS     | -1.3848042 |
| ERBB3    | -0.638948  |
| ERBB4    | -0.3914983 |
| ERC1     | -0.2676895 |
| ERC2     | -0.4219623 |
| ERCC3    | -0.7836585 |
| ERCC6    | -0.5406802 |
| ERCC6L   | -0.6494923 |
| ERCC8    | -0.3781347 |
| ERF      | -1.3878708 |
| ERGIC1   | -1.7476344 |
| ERGIC2   | -0.7429791 |
| ERGIC3   | -1.5219827 |
| ERI2     | -1.7626448 |
| ERI3     | -1.7418344 |
| ERICH4   | -3.7028632 |
| ERICH5   | -1.7592294 |
| ERICH6   | -0.5839138 |
| ERLEC1   | -0.5477991 |
| ERLIN1   | -1.6955805 |
| ERLIN2   | -0.8300719 |
| ERMARD   | -1.531054  |
| ERMP1    | -1.8751826 |
| ERO1LB   | -1.6712012 |

|         |            |
|---------|------------|
| ERP29   | -0.5852227 |
| ERP44   | -0.5091801 |
| ERRFI1  | -1.2203689 |
| ESCO2   | -1.9488406 |
| ESD     | -1.4843183 |
| ESP1    | -2.6855862 |
| ESPL1   | -0.5661116 |
| ESPN    | -2.6426256 |
| ESPNL   | -0.5736437 |
| ESR1    | -3.532317  |
| ESRP2   | -2.835205  |
| ESRRA   | -1.3260336 |
| ESRRB   | -1.7988181 |
| ESRRG   | -2.9922233 |
| ESX1    | -1.3818119 |
| ETAA1   | -0.4197629 |
| ETD     | -1.2015824 |
| ETFA    | -2.975968  |
| ETFB    | -3.168311  |
| ETFDH   | -3.3171759 |
| ETHE1   | -3.582099  |
| ETNK2   | -5.8520164 |
| ETNPPL  | -7.21267   |
| ETOH11  | -0.5937688 |
| ETV2    | -1.871361  |
| EVA1A   | -3.796195  |
| EVC     | -2.161037  |
| EVI5    | -2.4936085 |
| EVX1    | -1.0746248 |
| EXD1    | -1.6123517 |
| EXD2    | -1.6773622 |
| EXO5    | -0.765954  |
| EXOC3L  | -1.1920736 |
| EXOC3L2 | -3.835347  |
| EXOC6   | -0.5206928 |
| EXOC7   | -1.6346135 |
| EXOC8   | -0.2249427 |
| EXOSC1  | -0.4733861 |
| EXOSC2  | -1.1829243 |
| EXOSC3  | -0.5871949 |
| EXOSC4  | -1.934835  |
| EXOSC5  | -1.2343636 |
| EXOSC6  | -0.5601387 |
| EXOSC7  | -1.385005  |
| EXOSC9  | -0.988513  |

|          |            |
|----------|------------|
| EXT1     | -1.6728783 |
| EXTL1    | -3.4561698 |
| EXTL2    | -0.9967146 |
| EYA1     | -0.7831578 |
| F10      | -3.0428324 |
| F11      | -5.1155505 |
| F11R     | -0.1978254 |
| F12      | -5.388242  |
| F13B     | -7.733657  |
| F2       | -4.4143066 |
| F2RL1    | -1.0930209 |
| F5       | -5.6914816 |
| F7       | -3.2881508 |
| F8       | -5.1338806 |
| F9       | -4.541     |
| FA2H     | -0.956775  |
| FAAH     | -5.144146  |
| FABP1    | -6.258186  |
| FABP2    | -5.875896  |
| FABP5    | -2.2519536 |
| FABP7    | -4.077446  |
| FABP9    | -2.6016922 |
| FADD     | -1.3218951 |
| FADDOS   | -2.1236446 |
| FADS1    | -4.54781   |
| FADS2    | -5.844115  |
| FADS6    | -4.6405973 |
| FAF1     | -0.4358912 |
| FAF2     | -1.2019529 |
| FAH      | -5.123728  |
| FAHD1    | -4.3039923 |
| FAHD2A   | -3.0142965 |
| FAM102A  | -0.569169  |
| FAM103A1 | -0.4346252 |
| FAM104A  | -0.4920859 |
| FAM107B  | -0.5999594 |
| FAM109A  | -0.5349608 |
| FAM110B  | -0.4476636 |
| FAM114A1 | -1.2429948 |
| FAM114A2 | -1.3821168 |
| FAM115E  | -1.2797604 |
| FAM118B  | -0.2132092 |
| FAM120A  | -0.9757223 |
| FAM120B  | -0.5063639 |
| FAM122A  | -0.1969008 |

|          |            |
|----------|------------|
| FAM122B  | -0.4382916 |
| FAM122C  | -1.5925226 |
| FAM124A  | -2.5055134 |
| FAM126A  | -0.1517134 |
| FAM131B  | -1.2426269 |
| FAM131C  | -4.7147675 |
| FAM134A  | -2.8209672 |
| FAM134C  | -1.5101881 |
| FAM135A  | -0.3257885 |
| FAM135B  | -1.6335468 |
| FAM136A  | -2.6143236 |
| FAM13A   | -1.7235479 |
| FAM149A  | -1.2554145 |
| FAM149B  | -0.9720666 |
| FAM151B  | -0.8665593 |
| FAM154A  | -1.586868  |
| FAM160B1 | -1.012301  |
| FAM160B2 | -0.7685762 |
| FAM162A  | -1.5830612 |
| FAM163A  | -1.3651085 |
| FAM163B  | -0.9512734 |
| FAM167B  | -4.7389927 |
| FAM168A  | -0.6191592 |
| FAM169B  | -3.1394167 |
| FAM170A  | -1.0998354 |
| FAM171A2 | -1.0289767 |
| FAM171B  | -2.418204  |
| FAM173A  | -2.0922556 |
| FAM173B  | -2.225809  |
| FAM175A  | -0.4609258 |
| FAM175B  | -0.3000379 |
| FAM180A  | -3.288001  |
| FAM181A  | -1.3703117 |
| FAM185A  | -1.9704773 |
| FAM187A  | -2.2344153 |
| FAM187B  | -1.1251478 |
| FAM188B2 | -0.5219681 |
| FAM192A  | -0.4481506 |
| FAM193A  | -0.8961644 |
| FAM193B  | -0.9762554 |
| FAM195A  | -4.7548003 |
| FAM198A  | -3.3187218 |
| FAM19A2  | -6.4535904 |
| FAM203A  | -0.889988  |
| FAM204A  | -0.6633797 |

|           |            |
|-----------|------------|
| FAM207A   | -1.1114821 |
| FAM20A    | -3.7787285 |
| FAM20B    | -0.7514386 |
| FAM20C    | -2.251018  |
| FAM210A   | -2.2402556 |
| FAM210B   | -2.449935  |
| FAM212A   | -1.3407192 |
| FAM213A   | -4.3982596 |
| FAM213B   | -3.1577907 |
| FAM214A   | -2.2523718 |
| FAM219A   | -1.1303258 |
| FAM219AOS | -0.6588705 |
| FAM221B   | -1.3668528 |
| FAM227A   | -0.9410641 |
| FAM228A   | -2.1959689 |
| FAM228B   | -1.9536524 |
| FAM229A   | -1.2153811 |
| FAM229B   | -0.9561477 |
| FAM24A    | -1.1763892 |
| FAM25C    | -1.4493237 |
| FAM26F    | -0.4446554 |
| FAM32A    | -0.6890178 |
| FAM35A    | -3.2455108 |
| FAM3A     | -1.1339993 |
| FAM3C     | -0.761507  |
| FAM45A    | -0.7232809 |
| FAM46A    | -1.324966  |
| FAM46D    | -1.5151916 |
| FAM47E    | -1.9908981 |
| FAM53A    | -0.908205  |
| FAM57B    | -1.7261751 |
| FAM58B    | -1.0967698 |
| FAM63A    | -0.9089017 |
| FAM64A    | -1.2775631 |
| FAM65C    | -1.8467336 |
| FAM69A    | -0.8434296 |
| FAM69C    | -1.1300559 |
| FAM71A    | -1.0615413 |
| FAM71F1   | -1.7790697 |
| FAM72A    | -0.9565644 |
| FAM73B    | -2.941153  |
| FAM78A    | -0.5106928 |
| FAM83A    | -1.0497749 |
| FAM83D    | -1.9987054 |
| FAM83F    | -3.1771052 |

|          |            |
|----------|------------|
| FAM83G   | -0.1548972 |
| FAM83H   | -0.8930483 |
| FAM84B   | -0.607806  |
| FAM86    | -1.3977885 |
| FAM89A   | -3.422134  |
| FAM89B   | -0.427248  |
| FAM92A   | -1.2115865 |
| FAM96A   | -1.3177977 |
| FAM98C   | -0.628685  |
| FAN1     | -1.4857757 |
| FANCB    | -1.5516555 |
| FANCC    | -0.8762817 |
| FANCD2OS | -1.7734478 |
| FANCE    | -0.669013  |
| FANCF    | -1.273088  |
| FANCI    | -1.0108829 |
| FANCL    | -0.5079165 |
| FANCM    | -0.9730296 |
| FAR2OS2  | -1.5600989 |
| FARP2    | -1.8955584 |
| FARS2    | -2.188764  |
| FARSA    | -0.2801628 |
| FARSB    | -0.523355  |
| FASN     | -3.0521584 |
| FASTK    | -1.2778869 |
| FASTKD1  | -1.8428836 |
| FASTKD2  | -1.6837192 |
| FASTKD3  | -0.7308898 |
| FASTKD5  | -1.1748967 |
| FAU      | -0.6819763 |
| FBLL1    | -2.6878881 |
| FBLN2    | -0.5527549 |
| FBLN5    | -1.0263925 |
| FBLN7    | -3.3460329 |
| FBP1     | -3.1940546 |
| FBXL12OS | -0.6042519 |
| FBXL15   | -1.1096535 |
| FBXL17   | -1.3096747 |
| FBXL19   | -0.1482282 |
| FBXL21   | -2.02851   |
| FBXL4    | -1.6311679 |
| FBXL6    | -1.3825698 |
| FBXL8    | -0.8965249 |
| FBXO16   | -0.858017  |
| FBXO18   | -0.871942  |

|         |            |
|---------|------------|
| FBXO21  | -3.3941884 |
| FBXO22  | -1.3649073 |
| FBXO3   | -1.7570834 |
| FBXO31  | -0.264658  |
| FBXO34  | -0.5941491 |
| FBXO36  | -0.6021366 |
| FBXO43  | -3.1999173 |
| FBXO47  | -0.9208996 |
| FBXO48  | -1.2127604 |
| FBXO6   | -0.6898885 |
| FBXO7   | -0.8752604 |
| FBXO8   | -2.1299257 |
| FBXO9   | -1.5276675 |
| FBXW14  | -1.2190995 |
| FBXW18  | -1.3561761 |
| FBXW19  | -2.6940436 |
| FBXW2   | -0.3278179 |
| FBXW21  | -1.2366271 |
| FBXW22  | -1.8081722 |
| FBXW24  | -1.687417  |
| FBXW26  | -4.3476543 |
| FBXW27  | -1.4825456 |
| FBXW4   | -0.4912462 |
| FBXW5   | -1.2251053 |
| FBXW9   | -0.6785865 |
| FCF1    | -0.4279623 |
| FCGR2B  | -1.260087  |
| FCGRT   | -3.6030898 |
| FCHSD2  | -0.5011511 |
| FCNA    | -5.4442143 |
| FCNAOS  | -3.9188557 |
| FCNB    | -0.8075862 |
| FCRL5   | -0.8690748 |
| FCRL6   | -1.5598526 |
| FDFT1   | -3.0411644 |
| FDPS    | -4.4128346 |
| FDX1    | -1.5746131 |
| FDX1L   | -1.7170663 |
| FDXACB1 | -1.7513151 |
| FDXR    | -2.6775818 |
| FECH    | -2.6461115 |
| FEM1A   | -1.3353686 |
| FER1L5  | -1.610817  |
| FER1L6  | -1.0189154 |
| FERD3L  | -3.7859101 |

|         |            |
|---------|------------|
| FERMT2  | -0.5153585 |
| FERT2   | -0.3487864 |
| FETUB   | -4.6407313 |
| FEZ1    | -1.3916831 |
| FFAR1   | -1.6043756 |
| FGA     | -1.4732561 |
| FGB     | -1.5195751 |
| FGD1    | -1.3019383 |
| FGD2    | -2.467608  |
| FGD5    | -0.398181  |
| FGD6    | -2.1798599 |
| FGF1    | -2.2257223 |
| FGF14   | -2.0012412 |
| FGF16   | -1.3012953 |
| FGF20   | -2.1978831 |
| FGF21   | -3.0229354 |
| FGF22   | -1.3221428 |
| FGF23   | -0.4538984 |
| FGF5    | -1.6998522 |
| FGF8    | -2.2290084 |
| FGF9    | -0.9214959 |
| FGFBP3  | -0.1662636 |
| FGFR1OP | -0.3339143 |
| FGFR3   | -0.6489692 |
| FGFR4   | -4.6400337 |
| FGFRL1  | -2.0571132 |
| FGG     | -1.2742682 |
| FGGY    | -6.043668  |
| FGL1    | -2.5163727 |
| FH1     | -1.8336496 |
| FHIT    | -3.028653  |
| FHL2    | -0.421083  |
| FIBP    | -1.1395297 |
| FICD    | -0.4647584 |
| FIG4    | -0.8482175 |
| FIGLA   | -1.5836306 |
| FIGNL1  | -0.3962398 |
| FITM1   | -1.8646545 |
| FITM2   | -2.0852528 |
| FIZ1    | -0.8219638 |
| FKBP11  | -1.0834167 |
| FKBP15  | -0.2141233 |
| FKBP1A  | -0.9261928 |
| FKBP2   | -1.2960782 |
| FKBP3   | -1.000947  |



|         |            |
|---------|------------|
| FKBP4   | -2.8422608 |
| FKBP8   | -2.845377  |
| FKBP9   | -0.7835655 |
| FKBPL   | -0.5989842 |
| FLAD1   | -2.6526046 |
| FLCN    | -0.5445676 |
| FLG     | -1.0523787 |
| FLOT2   | -0.1692901 |
| FLRT1   | -3.233698  |
| FLT3L   | -1.0440121 |
| FLT4    | -1.234447  |
| FLYWCH2 | -0.196259  |
| FMN2    | -1.5184574 |
| FMO1    | -3.5498676 |
| FMO3    | -4.3943563 |
| FMO4    | -3.2858157 |
| FMO5    | -6.040477  |
| FMO6    | -1.3339462 |
| FMO9    | -1.1040506 |
| FMOD    | -0.9434404 |
| FMR1NB  | -1.9268718 |
| FN1     | -2.0573835 |
| FN3K    | -5.3502855 |
| FNDC3A  | -0.7033148 |
| FNDC3C1 | -2.069306  |
| FNDC4   | -3.208181  |
| FNIP2   | -0.4626613 |
| FNTA    | -0.5064497 |
| FOCAD   | -1.3809195 |
| FOLR1   | -3.5613658 |
| FOLR2   | -4.2402496 |
| FOLR4   | -0.3922744 |
| FOPNL   | -1.1309352 |
| FOXA2   | -1.297823  |
| FOXA3   | -4.07135   |
| FOXB2   | -2.1801586 |
| FOXD3   | -0.9489262 |
| FOXE1   | -2.132081  |
| FOXG1   | -0.4337783 |
| FOXH1   | -0.7413189 |
| FOXI1   | -1.3855    |
| FOXI3   | -0.3649712 |
| FOXK2   | -0.4858389 |
| FOXL2   | -1.2860212 |
| FOXL2OS | -1.8233788 |

|          |            |
|----------|------------|
| FOXMI    | -0.9539647 |
| FOXO1    | -0.3573446 |
| FOXO4    | -0.4490502 |
| FOXP2    | -1.1204913 |
| FOXQ1    | -0.6250501 |
| FOXR2    | -1.703207  |
| FOXRED1  | -1.3285642 |
| FPGS     | -4.0051246 |
| FPGT     | -1.2594154 |
| FPR-RS3  | -0.9897323 |
| FRA10AC1 | -1.5712919 |
| FRAT1    | -2.0167007 |
| FREM3    | -2.2162228 |
| FRMD3    | -1.9656126 |
| FRMD6    | -1.0461819 |
| FRMD8OS  | -1.6476228 |
| FRMPD3   | -1.7502801 |
| FRRS1    | -1.0683033 |
| FRRS1L   | -1.9404466 |
| FRZB     | -1.5794384 |
| FSBP     | -1.7909324 |
| FSCB     | -2.8298025 |
| FSCN2    | -1.7048025 |
| FSHR     | -1.6355007 |
| FSIP2    | -1.5958276 |
| FST      | -0.4254642 |
| FTCD     | -5.7997036 |
| FTH1     | -0.9963331 |
| FTL1     | -1.715662  |
| FTMT     | -1.0952153 |
| FTO      | -1.1114745 |
| FTSJ1    | -0.7113223 |
| FTSJ2    | -2.4816086 |
| FUCA1    | -1.5571175 |
| FUK      | -1.3406434 |
| FUOM     | -2.7789235 |
| FURIN    | -1.0936723 |
| FUT10    | -1.062293  |
| FUT4-PS1 | -1.7643471 |
| FUT7     | -1.3281136 |
| FUZ      | -1.2273004 |
| FXN      | -2.8823848 |
| FXYD1    | -4.4653015 |
| FXYD7    | -2.518672  |
| FYCO1    | -1.3164363 |

|            |            |
|------------|------------|
| FZD7       | -0.9955332 |
| FZD8       | -1.6482596 |
| FZR1       | -0.6583705 |
| G0S2       | -2.6327467 |
| G3BP2      | -0.3615136 |
| G6PC       | -4.4774303 |
| GAA        | -1.3239446 |
| GABARAP    | -0.2898688 |
| GABARAPL1  | -1.2280927 |
| GABPA      | -0.4494953 |
| GABRA1     | -2.5649028 |
| GABRB1     | -2.8690438 |
| GABRD      | -1.7768359 |
| GABRG3     | -0.6700583 |
| GABRR1     | -4.100524  |
| GABRR3     | -1.7019258 |
| GAD1       | -0.8900561 |
| GAD1OS     | -1.4950924 |
| GAD2       | -1.714174  |
| GADD45GIP1 | -2.0062242 |
| GADL1      | -1.2875922 |
| GAK        | -0.5470867 |
| GAL3ST1    | -0.7522759 |
| GAL3ST2    | -1.467262  |
| GAL3ST4    | -1.5990748 |
| GALE       | -2.0613284 |
| GALK1      | -2.863552  |
| GALK2      | -1.5546904 |
| GALM       | -5.384798  |
| GALNS      | -2.364859  |
| GALNT10    | -1.4628348 |
| GALNT11    | -0.6272855 |
| GALNT14    | -2.9122276 |
| GALNT2     | -0.3461351 |
| GALNT4     | -0.4056034 |
| GALNT5     | -1.2073107 |
| GALNT7     | -0.3735676 |
| GALNTL5    | -4.467829  |
| GALR3      | -1.7632475 |
| GALT       | -0.9956985 |
| GAMT       | -8.554161  |
| GANAB      | -1.7550058 |
| GANC       | -1.5560789 |
| GAPDH      | -1.472117  |
| GAPDHS     | -1.1923294 |

|         |            |
|---------|------------|
| GAREM   | -2.2347858 |
| GART    | -0.4769282 |
| GAS1    | -1.0379918 |
| GAS2    | -5.14307   |
| GAS2L2  | -0.6592557 |
| GAS2L3  | -0.604106  |
| GAS5    | -0.181181  |
| GAS6    | -0.8595877 |
| GAST    | -0.981596  |
| GATA4   | -4.229659  |
| GATA5   | -1.0171101 |
| GATA6   | -0.2951098 |
| GATAD1  | -1.0999217 |
| GATC    | -2.0552533 |
| GATM    | -0.6657348 |
| GATSL3  | -0.9365711 |
| GBE1    | -2.6630359 |
| GBF1    | -0.7945194 |
| GBP11   | -3.1710477 |
| GBP2B   | -2.4267793 |
| GBP8    | -1.8870201 |
| GBX1    | -1.1637156 |
| GBX2    | -1.4428182 |
| GC      | -3.8623147 |
| GCAT    | -5.143148  |
| GCC2    | -0.5330596 |
| GCDH    | -5.3576355 |
| GCG     | -1.3999543 |
| GCGR    | -6.6091914 |
| GCH1    | -1.5616946 |
| GCHFR   | -6.3558917 |
| GCK     | -6.351818  |
| GCKR    | -6.960576  |
| GCLC    | -0.837904  |
| GCLM    | -2.2192836 |
| GCM1    | -0.6612358 |
| GCM2    | -0.9458129 |
| GCN1L1  | -1.065268  |
| GCNT4   | -1.6083744 |
| GCNT7   | -1.116127  |
| GCSH    | -3.1969414 |
| GDAP1   | -1.5211604 |
| GDAP1L1 | -0.5497141 |
| GDAP2   | -0.6159611 |
| GDAP5   | -1.1719007 |

|        |            |
|--------|------------|
| GDF1   | -0.9994443 |
| GDF10  | -5.211733  |
| GDF11  | -1.4623759 |
| GDF15  | -0.9022012 |
| GDF2   | -5.944562  |
| GDF3   | -0.8505311 |
| GDF7   | -1.3816025 |
| GDI2   | -0.7237186 |
| GDPD4  | -2.1273396 |
| GDPGP1 | -1.4731925 |
| GEMIN2 | -2.425114  |
| GEMIN4 | -0.9497838 |
| GEMIN5 | -0.8319593 |
| GEMIN6 | -1.6151559 |
| GEMIN7 | -0.658318  |
| GEN1   | -1.0900819 |
| GFER   | -2.829823  |
| GFM1   | -1.6093154 |
| GFM2   | -2.2594981 |
| GFOD1  | -1.5545833 |
| GFOD2  | -0.584794  |
| GFRA1  | -3.2744179 |
| GFRA2  | -1.6070533 |
| GFRA3  | -0.9003928 |
| GGA1   | -1.1312366 |
| GGA2   | -1.6149483 |
| GGACT  | -2.9702878 |
| GGCT   | -0.9499393 |
| GGCX   | -3.5661116 |
| GGH    | -0.6410565 |
| GGNBP1 | -3.5509143 |
| GGNBP2 | -0.503643  |
| GGT6   | -3.7537503 |
| GH     | -1.6552255 |
| GHDC   | -1.8242869 |
| GHITM  | -1.3377032 |
| GHR    | -3.8088017 |
| GHRH   | -0.3242159 |
| GID4   | -0.8136888 |
| GID8   | -0.7459965 |
| GIGYF1 | -0.3478661 |
| GIGYF2 | -0.5013967 |
| GIMAP7 | -0.6969776 |
| GIMAP9 | -1.1194062 |
| GIN1   | -1.0004323 |

|          |            |
|----------|------------|
| GIN51    | -0.811779  |
| GIN53    | -0.2345076 |
| GIN54    | -1.0517926 |
| GIPC1    | -0.3954845 |
| GIT2     | -0.3539205 |
| GJA10    | -1.2833071 |
| GJA6     | -2.3554566 |
| GJA8     | -1.7330523 |
| GJB1     | -6.841746  |
| GJB2     | -2.8431315 |
| GJB5     | -3.4841769 |
| GJD2     | -2.4499884 |
| GJD3     | -1.2778559 |
| GJD4     | -1.5875206 |
| GKAP1    | -1.1833034 |
| GKN1     | -1.1683097 |
| GLB1     | -1.4091511 |
| GLCE     | -2.120829  |
| GLDC     | -7.2993336 |
| GLDN     | -6.542614  |
| GLE1     | -0.5385642 |
| GLIPR1L1 | -0.982805  |
| GLIS1    | -0.8184512 |
| GLMN     | -1.0978146 |
| GLO1     | -3.510054  |
| GLOD4    | -1.581078  |
| GLOD5    | -1.9042487 |
| GLP2R    | -0.8898838 |
| GLRA1    | -1.7249682 |
| GLRA3    | -1.6298637 |
| GLRA4    | -1.5213642 |
| GLRB     | -1.6660311 |
| GLRX     | -0.9481192 |
| GLRX2    | -0.8527803 |
| GLRX3    | -1.1180587 |
| GLRX5    | -2.3326516 |
| GLS2     | -6.653305  |
| GLT1D1   | -2.1448476 |
| GLT25D1  | -0.6882014 |
| GLT28D2  | -0.9989915 |
| GLT6D1   | -1.6579177 |
| GLT8D1   | -0.268219  |
| GLT8D2   | -0.8446915 |
| GLTPD1   | -1.8989234 |
| GLTPD2   | -6.0876694 |

|         |            |
|---------|------------|
| GLUD1   | -3.255589  |
| GLUL    | -1.4490991 |
| GLYAT   | -6.418599  |
| GLYATL3 | -1.3994579 |
| GLYCTK  | -6.3550835 |
| GLYR1   | -0.940702  |
| GM10007 | -1.2438376 |
| GM10015 | -0.3366089 |
| GM10023 | -1.7025883 |
| GM10030 | -2.3506694 |
| GM10034 | -0.7963753 |
| GM10057 | -1.6163054 |
| GM10094 | -0.4682679 |
| GM10101 | -0.3188646 |
| GM10113 | -2.8463097 |
| GM10134 | -1.1001081 |
| GM10176 | -1.7087591 |
| GM10190 | -1.0179851 |
| GM10209 | -3.0282571 |
| GM10220 | -2.8935027 |
| GM10229 | -1.1538639 |
| GM10252 | -1.8134725 |
| GM10266 | -1.7226679 |
| GM10272 | -0.6916535 |
| GM10276 | -1.8762097 |
| GM10277 | -1.8746207 |
| GM10286 | -1.178549  |
| GM10287 | -1.7735474 |
| GM10319 | -4.305503  |
| GM10367 | -3.1503038 |
| GM10370 | -0.7406128 |
| GM10372 | -0.8191402 |
| GM10375 | -2.053298  |
| GM10387 | -1.843178  |
| GM10388 | -0.97577   |
| GM10405 | -0.8969302 |
| GM10408 | -1.0130224 |
| GM10419 | -1.0747609 |
| GM10420 | -0.8502913 |
| GM10432 | -1.0969145 |
| GM10433 | -2.7654707 |
| GM10437 | -1.4795938 |
| GM10441 | -1.5893536 |
| GM10445 | -1.7781186 |
| GM10452 | -0.3127537 |

|         |            |
|---------|------------|
| GM10466 | -2.3492322 |
| GM10469 | -1.7733135 |
| GM10475 | -1.1332288 |
| GM10482 | -1.1937497 |
| GM10498 | -2.133174  |
| GM10501 | -1.9185426 |
| GM10509 | -0.8876202 |
| GM10513 | -1.124646  |
| GM10516 | -1.9313927 |
| GM10523 | -0.5708022 |
| GM10536 | -2.5449529 |
| GM10538 | -1.115844  |
| GM10548 | -1.3785512 |
| GM10549 | -1.6304328 |
| GM10555 | -1.6683798 |
| GM10556 | -3.685651  |
| GM10563 | -1.3945682 |
| GM10568 | -1.5580204 |
| GM10578 | -1.7439759 |
| GM10588 | -1.4908419 |
| GM10589 | -1.1864758 |
| GM10603 | -2.8677497 |
| GM10609 | -1.1185558 |
| GM10614 | -1.5022511 |
| GM10615 | -0.5467365 |
| GM10616 | -1.5649667 |
| GM10618 | -1.165072  |
| GM10624 | -1.3098454 |
| GM10627 | -1.7358172 |
| GM10632 | -1.2654371 |
| GM10639 | -4.598691  |
| GM10640 | -1.167855  |
| GM10651 | -0.9953139 |
| GM10653 | -0.9266667 |
| GM10658 | -5.0949717 |
| GM10680 | -3.3464475 |
| GM10682 | -1.1433368 |
| GM10683 | -1.7132416 |
| GM10687 | -0.5083802 |
| GM10696 | -0.8392189 |
| GM10697 | -0.4541223 |
| GM10703 | -1.1502838 |
| GM10706 | -1.36339   |
| GM10714 | -2.3232768 |
| GM10727 | -1.6257253 |



|         |            |
|---------|------------|
| GM10730 | -1.686266  |
| GM10733 | -1.5936074 |
| GM10734 | -2.247904  |
| GM10739 | -1.1903737 |
| GM10743 | -1.6024935 |
| GM10744 | -3.1417716 |
| GM10747 | -1.9541862 |
| GM10752 | -4.6696243 |
| GM10753 | -1.4483676 |
| GM10766 | -0.9319294 |
| GM10767 | -0.4981933 |
| GM10768 | -7.0040865 |
| GM10776 | -2.302558  |
| GM10777 | -0.8522594 |
| GM10778 | -0.6278787 |
| GM10779 | -1.9776928 |
| GM10782 | -1.2022705 |
| GM10785 | -0.960175  |
| GM10790 | -3.4902246 |
| GM10802 | -0.6375463 |
| GM10814 | -2.388242  |
| GM10815 | -1.7552547 |
| GM10822 | -1.6091075 |
| GM10824 | -2.625926  |
| GM10825 | -1.6720455 |
| GM10827 | -4.094446  |
| GM10830 | -2.1017585 |
| GM10836 | -2.8721268 |
| GM10845 | -0.4639392 |
| GM10854 | -1.5940132 |
| GM10863 | -1.260381  |
| GM10864 | -1.0506368 |
| GM10865 | -0.855654  |
| GM10867 | -1.9339743 |
| GM10869 | -2.505111  |
| GM10871 | -0.9476225 |
| GM10873 | -1.881886  |
| GM10910 | -1.6114192 |
| GM10914 | -0.7884679 |
| GM11033 | -2.4220967 |
| GM11054 | -1.0712953 |
| GM1110  | -0.9837091 |
| GM11127 | -1.9467306 |
| GM11128 | -0.8870156 |
| GM11159 | -1.6860144 |

|         |            |
|---------|------------|
| GM11223 | -0.8116241 |
| GM1123  | -0.207262  |
| GM11237 | -1.5326478 |
| GM11240 | -3.0403357 |
| GM11266 | -1.6157548 |
| GM11292 | -1.591897  |
| GM11381 | -0.8986175 |
| GM1140  | -2.2042375 |
| GM1141  | -1.7527318 |
| GM11437 | -6.401659  |
| GM11492 | -2.0441206 |
| GM11497 | -1.2354484 |
| GM11529 | -1.630224  |
| GM11541 | -2.5430984 |
| GM11544 | -1.341054  |
| GM11545 | -2.2511258 |
| GM11546 | -2.56572   |
| GM11570 | -1.5442519 |
| GM11595 | -1.1800416 |
| GM11634 | -0.4357905 |
| GM11677 | -0.6843269 |
| GM11710 | -2.7774396 |
| GM11780 | -1.7426319 |
| GM11783 | -1.5433497 |
| GM11810 | -0.4549623 |
| GM11937 | -1.3257465 |
| GM11981 | -1.2843297 |
| GM12000 | -2.7327754 |
| GM12059 | -2.347122  |
| GM12060 | -0.5097508 |
| GM12070 | -1.5591516 |
| GM12171 | -1.1041243 |
| GM12247 | -1.8130627 |
| GM12258 | -0.9697199 |
| GM12273 | -0.8902838 |
| GM12298 | -0.9098051 |
| GM12302 | -2.5382028 |
| GM12447 | -0.672935  |
| GM12474 | -1.3139815 |
| GM12503 | -2.4107366 |
| GM12508 | -0.1398702 |
| GM12511 | -1.4796715 |
| GM12522 | -0.8292074 |
| GM12542 | -2.990763  |
| GM12568 | -0.5733154 |

|         |            |
|---------|------------|
| GM12569 | -1.1376595 |
| GM12618 | -0.3318811 |
| GM12620 | -0.979384  |
| GM12689 | -0.7144795 |
| GM12693 | -0.6873283 |
| GM12703 | -4.230812  |
| GM12758 | -1.9443662 |
| GM12794 | -1.6375444 |
| GM12816 | -0.2782211 |
| GM12830 | -1.6184247 |
| GM12863 | -1.1937749 |
| GM12886 | -1.6156683 |
| GM12888 | -1.6277206 |
| GM12942 | -1.918519  |
| GM12992 | -1.6709442 |
| GM13011 | -1.6899028 |
| GM13023 | -2.1522722 |
| GM13032 | -1.3618066 |
| GM13051 | -3.2121682 |
| GM13084 | -1.9716215 |
| GM13089 | -3.3244665 |
| GM13111 | -3.2975032 |
| GM13112 | -1.6656075 |
| GM13119 | -1.8849583 |
| GM13124 | -1.6164858 |
| GM13125 | -1.7523272 |
| GM13128 | -3.2575126 |
| GM13177 | -1.5241756 |
| GM13180 | -1.0766525 |
| GM13194 | -1.2101212 |
| GM13202 | -1.8831868 |
| GM13205 | -1.932673  |
| GM13219 | -1.3251455 |
| GM1322  | -2.8763187 |
| GM13315 | -2.2640524 |
| GM13403 | -0.875113  |
| GM13420 | -1.8449051 |
| GM13498 | -1.0380611 |
| GM13522 | -2.9595022 |
| GM13582 | -2.2636302 |
| GM13629 | -1.0419209 |
| GM13710 | -1.2524557 |
| GM13769 | -1.2705343 |
| GM13770 | -2.1032357 |
| GM13777 | -0.6033444 |

|         |            |
|---------|------------|
| GM13807 | -3.7105353 |
| GM13826 | -0.4489994 |
| GM14015 | -4.4548454 |
| GM14025 | -0.9537473 |
| GM14129 | -1.6325192 |
| GM14149 | -1.669308  |
| GM14151 | -3.3527822 |
| GM14207 | -0.8691156 |
| GM14288 | -1.5989761 |
| GM14305 | -0.8519046 |
| GM14308 | -0.6496065 |
| GM14322 | -0.9008617 |
| GM14325 | -1.4612889 |
| GM14326 | -0.874867  |
| GM14340 | -2.4617336 |
| GM14347 | -1.6619129 |
| GM14374 | -1.6389749 |
| GM14391 | -0.8940988 |
| GM14393 | -1.0097356 |
| GM14410 | -0.8278132 |
| GM14431 | -0.7596226 |
| GM14432 | -1.4194169 |
| GM14440 | -1.0293202 |
| GM14443 | -0.9591618 |
| GM14484 | -2.3162851 |
| GM14486 | -0.8924215 |
| GM14496 | -4.1200247 |
| GM14499 | -0.2934132 |
| GM14703 | -1.1661272 |
| GM14725 | -1.5993116 |
| GM14851 | -2.1022177 |
| GM15023 | -2.1398149 |
| GM15032 | -0.2336869 |
| GM15104 | -1.3967185 |
| GM15232 | -0.626051  |
| GM1527  | -1.4203827 |
| GM15292 | -1.1855931 |
| GM15386 | -1.7547829 |
| GM15401 | -1.815171  |
| GM15411 | -4.5745115 |
| GM15412 | -1.3609686 |
| GM15417 | -0.8994894 |
| GM15441 | -1.0242813 |
| GM15478 | -1.6644921 |
| GM15482 | -1.4395945 |

|         |            |
|---------|------------|
| GM15498 | -1.6542299 |
| GM15514 | -2.6149325 |
| GM1564  | -2.201036  |
| GM15688 | -1.6248393 |
| GM15698 | -0.2807341 |
| GM15706 | -0.2485285 |
| GM15762 | -2.5656285 |
| GM15772 | -0.6704712 |
| GM15800 | -0.6049228 |
| GM15821 | -0.9513314 |
| GM16039 | -1.9746192 |
| GM1604B | -2.9694216 |
| GM16062 | -1.1128039 |
| GM16223 | -1.8007708 |
| GM16287 | -0.5230329 |
| GM16381 | -0.8763075 |
| GM16386 | -1.0510058 |
| GM16428 | -0.929425  |
| GM16441 | -0.9946613 |
| GM16442 | -1.3229153 |
| GM16462 | -0.806613  |
| GM16489 | -1.9826787 |
| GM16491 | -1.3107648 |
| GM16497 | -2.4419909 |
| GM16498 | -1.9683292 |
| GM16499 | -2.0044017 |
| GM16525 | -1.5991664 |
| GM16527 | -1.7244625 |
| GM16532 | -1.5823276 |
| GM16853 | -0.1685257 |
| GM1698  | -2.4605465 |
| GM17359 | -1.600565  |
| GM17727 | -2.6489594 |
| GM17745 | -2.914907  |
| GM17748 | -0.7716799 |
| GM17753 | -1.3822935 |
| GM17764 | -1.0100927 |
| GM17783 | -1.341054  |
| GM19410 | -2.0119817 |
| GM1943  | -1.2164695 |
| GM1965  | -1.3039088 |
| GM19668 | -1.4599872 |
| GM1968  | -0.6544592 |
| GM1971  | -1.3929343 |
| GM20056 | -1.0487185 |

|         |            |
|---------|------------|
| GM2011  | -1.5255256 |
| GM2016  | -0.3364525 |
| GM2027  | -1.2428095 |
| GM20554 | -1.3802576 |
| GM20740 | -1.5585389 |
| GM20746 | -2.22613   |
| GM20747 | -1.8714767 |
| GM20754 | -1.6582823 |
| GM20755 | -1.6072018 |
| GM20764 | -0.2252579 |
| GM20837 | -2.2520275 |
| GM2085  | -3.156877  |
| GM20865 | -1.1519866 |
| GM20867 | -1.6705976 |
| GM20877 | -1.9628332 |
| GM2090  | -1.4840801 |
| GM20918 | -1.3412418 |
| GM20939 | -1.6745415 |
| GM2109  | -1.6631644 |
| GM21292 | -1.1722989 |
| GM2137  | -1.3132513 |
| GM2138  | -2.2251318 |
| GM21404 | -1.981329  |
| GM21464 | -1.8111303 |
| GM21498 | -1.5299094 |
| GM21559 | -0.5768337 |
| GM21637 | -0.8593431 |
| GM2164  | -1.6000834 |
| GM2176  | -4.0730724 |
| GM2238  | -0.8877864 |
| GM2240  | -0.4966383 |
| GM2287  | -1.5056224 |
| GM2347  | -0.4982007 |
| GM2382  | -1.6139421 |
| GM2436  | -0.8595834 |
| GM2464  | -1.7421014 |
| GM2483  | -1.6582592 |
| GM2491  | -1.5857844 |
| GM2516  | -3.0357158 |
| GM2582  | -1.2331543 |
| GM2670  | -1.6413896 |
| GM2800  | -2.1352537 |
| GM2814  | -2.1616507 |
| GM2933  | -4.4431686 |
| GM2990  | -1.086302  |

|        |            |
|--------|------------|
| GM2A   | -2.84899   |
| GM3032 | -1.0992692 |
| GM3045 | -1.0469837 |
| GM3052 | -1.5098317 |
| GM3134 | -1.7861273 |
| GM3143 | -1.7453148 |
| GM3146 | -1.2252707 |
| GM3219 | -4.6317377 |
| GM3227 | -1.4930551 |
| GM324  | -1.3780842 |
| GM3258 | -0.8013802 |
| GM3285 | -1.1803763 |
| GM3289 | -2.6454868 |
| GM3300 | -0.6537733 |
| GM3336 | -0.9782658 |
| GM3448 | -0.6604271 |
| GM3455 | -1.1587896 |
| GM3470 | -0.9581623 |
| GM3474 | -1.6025033 |
| GM3509 | -1.2816067 |
| GM3519 | -1.5164361 |
| GM355  | -2.9305034 |
| GM3561 | -0.4333229 |
| GM3625 | -0.4708781 |
| GM3646 | -1.6867304 |
| GM3669 | -1.1127181 |
| GM3696 | -0.5755608 |
| GM3704 | -3.225829  |
| GM3716 | -1.3834293 |
| GM3740 | -1.0819798 |
| GM3763 | -1.7345364 |
| GM3775 | -1.5949731 |
| GM3776 | -4.3012958 |
| GM3807 | -0.7666764 |
| GM3830 | -4.180171  |
| GM3853 | -1.2563167 |
| GM3858 | -0.6963494 |
| GM3896 | -1.0320127 |
| GM3907 | -1.1605587 |
| GM3942 | -1.1980367 |
| GM3948 | -1.6731668 |
| GM3960 | -1.0725482 |
| GM3970 | -1.1291735 |
| GM3985 | -1.6594496 |
| GM4013 | -2.3778152 |

|        |            |
|--------|------------|
| GM4035 | -0.6204228 |
| GM4081 | -1.0816596 |
| GM4098 | -1.5840211 |
| GM4117 | -1.8169193 |
| GM4130 | -0.6879754 |
| GM4131 | -3.4234538 |
| GM4201 | -2.2512007 |
| GM4230 | -0.9254956 |
| GM4241 | -1.2847421 |
| GM4279 | -1.721945  |
| GM4285 | -1.3866186 |
| GM4297 | -1.7517974 |
| GM4303 | -2.5982938 |
| GM4311 | -0.3692362 |
| GM4312 | -1.3824549 |
| GM4342 | -0.6372156 |
| GM436  | -0.9845123 |
| GM4371 | -1.4877591 |
| GM438  | -0.6737037 |
| GM44   | -1.5497115 |
| GM4402 | -2.4577856 |
| GM4419 | -2.400971  |
| GM4432 | -1.218102  |
| GM4466 | -1.738888  |
| GM4489 | -3.1954668 |
| GM4532 | -0.8976405 |
| GM4544 | -1.7274487 |
| GM4567 | -2.3248749 |
| GM4606 | -1.0175383 |
| GM4632 | -1.587285  |
| GM4633 | -1.2682967 |
| GM4657 | -1.3136835 |
| GM4665 | -1.4770207 |
| GM4668 | -2.2084508 |
| GM4710 | -1.6220992 |
| GM4719 | -1.1384459 |
| GM4736 | -1.1989858 |
| GM4745 | -1.8040524 |
| GM4758 | -1.8763025 |
| GM4763 | -2.2211282 |
| GM4786 | -0.9517407 |
| GM4787 | -2.054199  |
| GM4788 | -4.0430126 |
| GM4791 | -1.3977478 |
| GM4792 | -1.2503228 |



|        |            |
|--------|------------|
| GM4794 | -5.236724  |
| GM4802 | -1.0094738 |
| GM4814 | -1.1335616 |
| GM4832 | -0.282187  |
| GM4858 | -1.5354533 |
| GM4868 | -1.8266559 |
| GM4871 | -0.387579  |
| GM4876 | -2.8102076 |
| GM4881 | -1.553987  |
| GM4889 | -0.3903289 |
| GM4890 | -1.8917589 |
| GM4906 | -1.590163  |
| GM4922 | -1.5446906 |
| GM4924 | -0.8906293 |
| GM4925 | -2.1611972 |
| GM4943 | -1.909369  |
| GM4944 | -0.2590747 |
| GM4951 | -1.2562904 |
| GM4952 | -9.853824  |
| GM4963 | -0.463295  |
| GM4971 | -0.9350929 |
| GM4997 | -0.4637365 |
| GM5    | -0.9395564 |
| GM5039 | -1.1048577 |
| GM5069 | -1.7896662 |
| GM5079 | -1.4979196 |
| GM5083 | -1.5715921 |
| GM5084 | -1.037457  |
| GM5089 | -2.1609066 |
| GM5091 | -1.6638365 |
| GM5093 | -0.7068977 |
| GM5099 | -1.6733878 |
| GM5112 | -1.6959071 |
| GM5113 | -0.7717717 |
| GM5114 | -1.1192324 |
| GM5118 | -1.4941607 |
| GM5122 | -2.501839  |
| GM5124 | -1.3471966 |
| GM5126 | -2.8145006 |
| GM5127 | -1.5479579 |
| GM5132 | -2.159629  |
| GM5134 | -1.763912  |
| GM5155 | -1.2185252 |
| GM5174 | -1.808794  |
| GM525  | -2.0009391 |

|        |            |
|--------|------------|
| GM5296 | -0.779424  |
| GM53   | -1.6600356 |
| GM5331 | -2.0850677 |
| GM5334 | -1.136276  |
| GM5382 | -2.7831411 |
| GM5420 | -1.2604544 |
| GM5441 | -0.6397126 |
| GM5445 | -0.4596014 |
| GM5447 | -1.8249335 |
| GM5453 | -0.5542722 |
| GM5468 | -1.6405456 |
| GM5475 | -1.2907474 |
| GM5478 | -2.23119   |
| GM5481 | -0.3600311 |
| GM5523 | -1.2586069 |
| GM5524 | -8.525318  |
| GM5526 | -0.5403876 |
| GM5528 | -0.4469905 |
| GM553  | -1.7398198 |
| GM5531 | -3.248255  |
| GM5533 | -2.5397766 |
| GM5544 | -1.0285244 |
| GM5553 | -1.2911386 |
| GM5570 | -0.8706832 |
| GM5585 | -3.4730408 |
| GM5590 | -0.7009144 |
| GM5591 | -1.8069773 |
| GM5593 | -1.0401673 |
| GM5607 | -0.7770901 |
| GM561  | -1.699336  |
| GM5617 | -2.4040637 |
| GM5622 | -3.111927  |
| GM5712 | -1.9891639 |
| GM572  | -1.0389242 |
| GM5741 | -1.5776813 |
| GM5766 | -0.9150543 |
| GM5767 | -1.1435885 |
| GM5771 | -2.2996469 |
| GM5779 | -0.8372378 |
| GM5784 | -1.2477269 |
| GM5800 | -1.7219081 |
| GM5801 | -0.5702877 |
| GM5848 | -1.1074286 |
| GM5849 | -1.8487167 |
| GM5860 | -0.4421687 |

|        |            |
|--------|------------|
| GM5879 | -0.4260187 |
| GM5893 | -1.1062636 |
| GM5907 | -1.6450405 |
| GM5908 | -0.9036017 |
| GM5916 | -1.2100067 |
| GM5922 | -1.5927198 |
| GM5925 | -0.7998476 |
| GM5932 | -2.0991013 |
| GM595  | -4.1368227 |
| GM597  | -0.8230383 |
| GM6042 | -1.0587716 |
| GM6093 | -1.1207752 |
| GM6109 | -0.5116434 |
| GM6135 | -6.591322  |
| GM6145 | -1.9628584 |
| GM6150 | -1.6953933 |
| GM6155 | -0.8127298 |
| GM6195 | -0.5691223 |
| GM6209 | -0.6977999 |
| GM6219 | -1.5084713 |
| GM6238 | -1.2888117 |
| GM626  | -0.9346294 |
| GM6260 | -1.6563301 |
| GM6277 | -1.0341306 |
| GM6280 | -1.9458618 |
| GM6297 | -2.6980865 |
| GM6306 | -0.8431432 |
| GM6307 | -1.8749354 |
| GM6360 | -1.2755425 |
| GM6370 | -1.4303029 |
| GM6404 | -0.425818  |
| GM6406 | -1.6306059 |
| GM6416 | -1.5542135 |
| GM6436 | -0.9504039 |
| GM6444 | -1.989564  |
| GM6471 | -1.7469015 |
| GM6484 | -8.037497  |
| GM6498 | -1.7759852 |
| GM6521 | -1.1604114 |
| GM6525 | -0.5414543 |
| GM6537 | -1.8479772 |
| GM6548 | -1.4300256 |
| GM6556 | -0.6160264 |
| GM6559 | -1.6662333 |
| GM6566 | -1.4035449 |

|        |            |
|--------|------------|
| GM6578 | -0.649066  |
| GM6598 | -1.941098  |
| GM6607 | -0.2563114 |
| GM6614 | -4.100055  |
| GM6634 | -1.7543948 |
| GM6639 | -1.352067  |
| GM6653 | -1.5947902 |
| GM6658 | -1.6503973 |
| GM6687 | -1.6845834 |
| GM6710 | -0.6513133 |
| GM6713 | -1.1554191 |
| GM6787 | -1.0418499 |
| GM6818 | -1.9220467 |
| GM6867 | -0.7396123 |
| GM6878 | -1.5966749 |
| GM6880 | -1.77071   |
| GM6921 | -1.5042825 |
| GM6927 | -1.9460435 |
| GM694  | -1.7991035 |
| GM6943 | -1.4956179 |
| GM6961 | -1.7341104 |
| GM6980 | -1.5939844 |
| GM6981 | -1.8439837 |
| GM6987 | -1.7529154 |
| GM6994 | -1.1225953 |
| GM7008 | -0.9437935 |
| GM7104 | -1.0705116 |
| GM7120 | -2.542306  |
| GM7133 | -2.25421   |
| GM7134 | -1.0207701 |
| GM7160 | -0.7875209 |
| GM7241 | -0.762888  |
| GM7256 | -2.3919935 |
| GM7257 | -1.3112183 |
| GM7276 | -1.7160683 |
| GM732  | -1.2034404 |
| GM7325 | -1.2138786 |
| GM7457 | -0.9929102 |
| GM7467 | -1.4127934 |
| GM7534 | -2.353151  |
| GM7538 | -2.3312898 |
| GM7546 | -2.1927605 |
| GM7550 | -1.1981988 |
| GM7555 | -0.5053358 |
| GM7562 | -1.6438298 |

|        |            |
|--------|------------|
| GM7596 | -1.3998754 |
| GM7616 | -2.7582066 |
| GM7628 | -2.47119   |
| GM7634 | -0.4863362 |
| GM765  | -1.6063163 |
| GM766  | -2.474191  |
| GM7664 | -0.7159247 |
| GM7694 | -0.2257903 |
| GM7789 | -3.184111  |
| GM7849 | -1.2599435 |
| GM7854 | -2.983485  |
| GM7897 | -2.1933222 |
| GM7903 | -1.4823349 |
| GM7936 | -1.8965497 |
| GM7972 | -2.3847039 |
| GM7978 | -1.6282802 |
| GM805  | -1.2116127 |
| GM8094 | -0.8970451 |
| GM8149 | -1.5104544 |
| GM815  | -1.7319751 |
| GM8165 | -1.5608888 |
| GM8210 | -0.3378563 |
| GM8221 | -4.588304  |
| GM826  | -3.640059  |
| GM8479 | -1.5538237 |
| GM8493 | -0.8949373 |
| GM8505 | -2.6775198 |
| GM8526 | -0.5537982 |
| GM8541 | -1.63444   |
| GM8587 | -0.8970521 |
| GM8630 | -0.4149978 |
| GM8633 | -1.1837819 |
| GM8672 | -1.6071432 |
| GM8674 | -1.650917  |
| GM8700 | -1.1228194 |
| GM8709 | -1.8212113 |
| GM8738 | -3.7377076 |
| GM8765 | -1.4724908 |
| GM8801 | -0.5945478 |
| GM8817 | -1.3404276 |
| GM8883 | -3.8068805 |
| GM8909 | -0.7024093 |
| GM8994 | -0.7790871 |
| GM904  | -1.2142344 |
| GM9054 | -1.504102  |

|        |            |
|--------|------------|
| GM9079 | -0.3750386 |
| GM9112 | -1.6706715 |
| GM9182 | -0.3420515 |
| GM9199 | -2.7647126 |
| GM9234 | -1.1212368 |
| GM9325 | -1.7449121 |
| GM9376 | -1.7384646 |
| GM9385 | -1.0001197 |
| GM9457 | -0.611454  |
| GM9558 | -1.0686002 |
| GM9564 | -1.171627  |
| GM960  | -1.3913531 |
| GM973  | -1.7754803 |
| GM9731 | -0.6858382 |
| GM9734 | -0.9776211 |
| GM9752 | -1.6330483 |
| GM9753 | -1.1255825 |
| GM9801 | -1.5930166 |
| GM9804 | -1.8353918 |
| GM9833 | -2.9172847 |
| GM9860 | -1.6263299 |
| GM9861 | -0.9553738 |
| GM9869 | -1.5405407 |
| GM9871 | -1.4401503 |
| GM9872 | -1.7305648 |
| GM9876 | -0.6472957 |
| GM9878 | -0.9109154 |
| GM9883 | -1.070615  |
| GM9895 | -1.6654027 |
| GM9903 | -1.0531442 |
| GM9909 | -3.8507566 |
| GM9916 | -2.6212902 |
| GM9928 | -1.0584254 |
| GM9934 | -1.6170814 |
| GM9951 | -1.2199574 |
| GM9958 | -1.6671839 |
| GM9959 | -1.6520379 |
| GM9962 | -1.7075984 |
| GM9963 | -0.9413855 |
| GM9973 | -2.058695  |
| GM9992 | -0.7141933 |
| GMCL1  | -0.9212947 |
| GMEB2  | -0.4250853 |
| GML    | -1.310391  |
| GMNN   | -1.206173  |

|         |            |
|---------|------------|
| GMPPA   | -0.9868221 |
| GMPPB   | -0.5002031 |
| GMPR2   | -0.9517479 |
| GMPS    | -0.3515389 |
| GNA11   | -1.9347    |
| GNA12   | -1.5865145 |
| GNA15   | -0.4865205 |
| GNAI3   | -0.2421627 |
| GNAS    | -0.8158627 |
| GNAT1   | -1.9894259 |
| GNAT2   | -3.5630262 |
| GNB2L1  | -0.5910244 |
| GNE     | -3.1346169 |
| GNG11   | -0.6786823 |
| GNG5    | -0.5788388 |
| GNG7    | -1.6523821 |
| GNG8    | -1.9818573 |
| GNGT1   | -4.682358  |
| GNMT    | -7.137781  |
| GNPAT   | -0.4068847 |
| GNPDA1  | -1.6273246 |
| GNPNAT1 | -2.1141477 |
| GNPTG   | -1.3893471 |
| GNRHR   | -2.0958936 |
| GNS     | -0.7470107 |
| GOLGA1  | -0.514298  |
| GOLGA7  | -0.5257053 |
| GOLGA7B | -1.033864  |
| GOLIM4  | -1.8513637 |
| GOLT1A  | -2.5698872 |
| GOPC    | -0.613009  |
| GORASP1 | -2.1073036 |
| GORASP2 | -0.8465858 |
| GOSR1   | -0.8927999 |
| GOSR2   | -0.6133537 |
| GOT1    | -2.2026663 |
| GOT1L1  | -1.4417048 |
| GOT2    | -3.4518294 |
| GPAA1   | -0.7826619 |
| GPAM    | -2.9337378 |
| GPAT2   | -2.3273435 |
| GPATCH1 | -0.3540897 |
| GPATCH2 | -1.0496998 |
| GPBP1L1 | -0.5966415 |
| GPC2    | -1.3900204 |

|         |            |
|---------|------------|
| GPC4    | -1.9775608 |
| GPC5    | -1.2057157 |
| GPC6    | -2.1673627 |
| GPD1    | -4.6544228 |
| GPD1L   | -1.8916163 |
| GPD2    | -1.6776929 |
| GPHN    | -1.7634053 |
| GPI1    | -1.1809273 |
| GPIHBP1 | -0.5308719 |
| GPLD1   | -3.6659224 |
| GPN2    | -0.8563032 |
| GPN3    | -0.8116298 |
| GPR1    | -1.2990122 |
| GPR101  | -1.2658765 |
| GPR107  | -0.2986102 |
| GPR108  | -0.4499431 |
| GPR110  | -2.9677222 |
| GPR111  | -1.5987217 |
| GPR12   | -1.7836714 |
| GPR125  | -1.5405273 |
| GPR128  | -1.5752017 |
| GPR135  | -2.717149  |
| GPR137  | -0.8729367 |
| GPR137C | -0.8864861 |
| GPR142  | -2.1773777 |
| GPR143  | -2.4609091 |
| GPR150  | -1.6352136 |
| GPR155  | -1.6472573 |
| GPR157  | -1.0702672 |
| GPR162  | -0.2777124 |
| GPR17   | -1.2217383 |
| GPR173  | -2.0610313 |
| GPR182  | -2.075799  |
| GPR19   | -1.3439393 |
| GPR22   | -0.9998651 |
| GPR37L1 | -1.3127964 |
| GPR55   | -1.3897433 |
| GPR63   | -1.6129673 |
| GPR64   | -0.485147  |
| GPR75   | -2.218131  |
| GPR83   | -1.626195  |
| GPR89   | -2.1954963 |
| GPR98   | -2.0003157 |
| GPRASP2 | -0.1749311 |
| GPRC5C  | -3.9511538 |



|          |            |
|----------|------------|
| GPRC5D   | -1.4860299 |
| GPRIN2   | -1.2439775 |
| GPRIN3   | -1.5518801 |
| GPS1     | -1.209671  |
| GPSM2    | -2.150826  |
| GPT      | -5.9803586 |
| GPT2     | -4.3514013 |
| GPX1     | -3.1915011 |
| GPX4     | -1.8793163 |
| GPX7     | -0.9355533 |
| GRAMD1C  | -2.6528616 |
| GRAMD3   | -0.8998752 |
| GRB14    | -3.356082  |
| GRB7     | -3.274588  |
| GRCC10   | -2.0500054 |
| GREB1L   | -3.7918277 |
| GRHPR    | -3.934627  |
| GRIA1    | -0.5618253 |
| GRIA2    | -1.701071  |
| GRIA4    | -0.991467  |
| GRID1    | -2.093493  |
| GRID2    | -1.6290708 |
| GRIK1    | -2.030203  |
| GRIK2    | -1.8136837 |
| GRIK5    | -1.4318838 |
| GRIN1    | -2.0906792 |
| GRIN2A   | -1.6231942 |
| GRIN3B   | -3.0428324 |
| GRINA    | -0.8322353 |
| GRIP1OS1 | -1.4999144 |
| GRK1     | -1.7148652 |
| GRM1     | -1.8196871 |
| GRM2     | -1.5633683 |
| GRM5     | -0.6052289 |
| GRM8     | -2.4173045 |
| GRN      | -1.6967788 |
| GRPEL1   | -2.6567812 |
| GRPEL2   | -1.0272775 |
| GRSF1    | -1.7435231 |
| GRTP1    | -4.1649556 |
| GRWD1    | -0.7319713 |
| GRXCR1   | -1.4944413 |
| GRXCR2   | -1.5915155 |
| GSAP     | -0.3586192 |
| GSC      | -0.8823986 |

|           |            |
|-----------|------------|
| GSDMA2    | -1.2592044 |
| GSDMA3    | -1.1053815 |
| GSDMCL-PS | -1.4752738 |
| GSDMD     | -0.9800639 |
| GSG1L     | -2.1220016 |
| GSKIP     | -0.7292719 |
| GSPT1     | -1.0094461 |
| GSR       | -0.4396124 |
| GSS       | -3.127996  |
| GSTA2     | -5.0098    |
| GSTA3     | -4.261742  |
| GSTA4     | -1.4057736 |
| GSTK1     | -2.7576385 |
| GSTM1     | -4.2401977 |
| GSTM2     | -2.9175243 |
| GSTM3     | -5.756903  |
| GSTM4     | -4.556192  |
| GSTM5     | -3.0325599 |
| GSTM6     | -6.4507675 |
| GSTM7     | -6.9887    |
| GSTO1     | -1.0577087 |
| GSTP1     | -4.7552867 |
| GSTP2     | -3.3567767 |
| GSTT1     | -5.040344  |
| GSTT2     | -4.376514  |
| GSTT3     | -3.8429894 |
| GSTZ1     | -4.8133574 |
| GSX2      | -1.7057042 |
| GTF2A2    | -1.0810027 |
| GTF2E1    | -1.4349298 |
| GTF2E2    | -0.1705408 |
| GTF2H2    | -0.8932324 |
| GTF2H3    | -1.2895579 |
| GTF2H4    | -1.9393845 |
| GTF2H5    | -0.6446714 |
| GTF2I     | -1.5384688 |
| GTF2IRD1  | -0.4764905 |
| GTF2IRD2  | -0.6612196 |
| GTF3A     | -1.6995649 |
| GTF3C1    | -1.2650666 |
| GTF3C2    | -0.5226517 |
| GTF3C3    | -0.6183085 |
| GTF3C4    | -0.7090311 |
| GTF3C6    | -0.8929043 |
| GTL3      | -0.7674928 |

|          |            |
|----------|------------|
| GTPBP1   | -0.1939158 |
| GTPBP10  | -1.262332  |
| GTPBP3   | -0.6564074 |
| GTPBP6   | -0.2967501 |
| GTPBP8   | -1.2905841 |
| GTSF1L   | -0.9293733 |
| GUCA1A   | -3.7058609 |
| GUCA1B   | -0.3840981 |
| GUCD1    | -3.1279979 |
| GUCY1A2  | -0.7393327 |
| GUCY1B2  | -1.8920784 |
| GUCY2C   | -1.047487  |
| GUCY2E   | -1.2132721 |
| GUCY2F   | -2.1916935 |
| GUF1     | -0.9701529 |
| GUK1     | -1.2701664 |
| GULO     | -8.267108  |
| GUSB     | -0.294272  |
| GXYLT2   | -1.2048144 |
| GYK      | -2.2288265 |
| GYKL1    | -0.9673727 |
| GYLTL1B  | -0.8348212 |
| GYPE     | -0.7834148 |
| GYS2     | -4.871353  |
| GZF1     | -1.436739  |
| GZMD     | -1.7609084 |
| GZME     | -2.4130487 |
| GZMF     | -2.1701856 |
| H13      | -0.8409438 |
| H19      | -4.0015235 |
| H1FO     | -1.4284127 |
| H2-AA    | -0.5831265 |
| H2-AB1   | -1.1641469 |
| H2AFB2   | -2.046076  |
| H2AFJ    | -0.3442078 |
| H2AFV    | -1.7181382 |
| H2AFX    | -1.2553158 |
| H2AFY    | -0.4821253 |
| H2-DMA   | -1.7990341 |
| H2-DMB1  | -0.9177909 |
| H2-EA-PS | -2.000917  |
| H2-EB1   | -2.1828856 |
| H2-K1    | -1.2593145 |
| H2-K2    | -0.7038326 |
| H2-KE2   | -0.8702216 |

|          |            |
|----------|------------|
| H2-KE6   | -3.0386038 |
| H2-M1    | -1.6293433 |
| H2-M10.3 | -1.6869874 |
| H2-M10.4 | -2.4515646 |
| H2-M11   | -1.1992099 |
| H2-M2    | -1.0276871 |
| H2-M3    | -0.2369289 |
| H2-M9    | -2.0398145 |
| H2-OA    | -0.2246227 |
| H2-Q1    | -4.578223  |
| H2-Q10   | -3.2261667 |
| H2-Q2    | -1.279911  |
| H2-Q4    | -0.674901  |
| H2-Q5    | -0.5023804 |
| H2-Q7    | -1.2616787 |
| H2-Q8    | -1.0418382 |
| H2-T10   | -2.4702053 |
| H2-T18   | -1.1021423 |
| H2-T23   | -1.8477554 |
| H2-T3    | -1.2591112 |
| H2-T9    | -2.5990114 |
| H60C     | -1.2453678 |
| H6PD     | -1.2893419 |
| HAAO     | -6.1983304 |
| HABP2    | -6.074837  |
| HABP4    | -2.4285913 |
| HACL1    | -5.2864165 |
| HADH     | -4.4948816 |
| HADHA    | -2.011456  |
| HADHB    | -2.8440027 |
| HAGH     | -4.0818567 |
| HAGHL    | -0.2385545 |
| HAL      | -4.487222  |
| HAMP     | -3.5071373 |
| HAMP2    | -12.424212 |
| HAND1    | -1.9356027 |
| HAND2    | -4.7110195 |
| HAO1     | -8.566832  |
| HAO2     | -9.3819    |
| HAPLN2   | -1.4091249 |
| HAPLN3   | -1.0387943 |
| HAPLN4   | -4.9466276 |
| HARBI1   | -1.577944  |
| HARS2    | -1.6364927 |
| HAS2OS   | -0.6465333 |

|         |            |
|---------|------------|
| HAUS1   | -0.7558098 |
| HAUS2   | -0.772418  |
| HAUS4   | -1.9307313 |
| HAUS5   | -1.1275625 |
| HAUS7   | -0.699101  |
| HAUS8   | -0.8157258 |
| HAVCR1  | -6.6103506 |
| HAX1    | -1.291903  |
| HBA-A1  | -0.417347  |
| HBA-A2  | -1.2778959 |
| HBB-BH2 | -1.7760179 |
| HBB-BT  | -0.1671505 |
| HBP1    | -0.2844367 |
| HBQ1A   | -0.9046543 |
| HBS1L   | -1.1205392 |
| HC      | -1.5593138 |
| HCAR1   | -1.3991871 |
| HCFC1   | -0.6116824 |
| HCFC1R1 | -1.8609304 |
| HCN1    | -1.0295763 |
| HCN2    | -0.9987488 |
| HCN3    | -1.3059938 |
| HDAC10  | -1.884614  |
| HDAC11  | -4.7202597 |
| HDAC3   | -1.1969199 |
| HDAC5   | -0.5074105 |
| HDAC6   | -1.2548456 |
| HDDC3   | -2.472159  |
| HDGF    | -0.8207359 |
| HDGFL1  | -2.8294368 |
| HDGFRP2 | -0.6919127 |
| HDHD2   | -0.8188114 |
| HDHD3   | -5.6308274 |
| HDLBP   | -1.430069  |
| HEATR5A | -0.2119331 |
| HEATR5B | -0.6398032 |
| HEATR6  | -0.6562939 |
| HEBP1   | -3.9426713 |
| HECTD1  | -0.3215551 |
| HECTD3  | -1.7255301 |
| HECW1   | -1.0217886 |
| HELB    | -0.4818034 |
| HELQ    | -0.8757834 |
| HEMGN   | -0.8804135 |
| HEMK1   | -2.9759917 |

|             |            |
|-------------|------------|
| HEPH        | -0.8660157 |
| HERPUD1     | -0.4093709 |
| HES5        | -0.6765435 |
| HES6        | -2.6489239 |
| HESX1       | -1.2724235 |
| HEXA        | -1.2723675 |
| HEXB        | -1.2763033 |
| HEXDC       | -1.8344109 |
| HEXIM1      | -0.4605613 |
| HEXIM2      | -0.6618919 |
| HFE         | -2.2825298 |
| HFE2        | -4.584532  |
| HFM1        | -1.417377  |
| HGD         | -8.876596  |
| HGF         | -0.8706484 |
| HGFAC       | -6.6154666 |
| HGS         | -0.5993166 |
| HGSNAT      | -1.6538315 |
| HHEX        | -3.3170376 |
| HHIPL2      | -2.1381881 |
| HHLA1       | -1.4552839 |
| HIAT1       | -0.4415588 |
| HIATL1      | -0.366281  |
| HIBADH      | -2.3387609 |
| HIBCH       | -3.3939238 |
| HIGD1A      | -1.166338  |
| HIGD1C      | -3.425023  |
| HIGD2A      | -2.0164642 |
| HINT1       | -1.5585895 |
| HINT2       | -3.6819558 |
| HINT3       | -2.023561  |
| HIPK2       | -0.5036101 |
| HIST1H1C    | -1.533577  |
| HIST1H1T    | -1.2258091 |
| HIST1H2AA   | -0.9218226 |
| HIST1H2AK   | -0.1395664 |
| HIST1H2BA   | -2.2313147 |
| HIST1H2BC   | -2.5721335 |
| HIST1H2BM   | -2.1692948 |
| HIST1H4I    | -0.4584861 |
| HIST2H2AA2  | -0.4096198 |
| HIST2H2AC   | -0.1878619 |
| HIST2H3C2   | -2.6586578 |
| HIST3H2BB-P | -2.5856218 |
| HJURP       | -2.333583  |

|          |            |
|----------|------------|
| HK1      | -0.3993335 |
| HK3      | -1.1205993 |
| HLCS     | -1.7538812 |
| HLF      | -4.2648687 |
| HMBOX1   | -1.5937133 |
| HMBS     | -2.5308022 |
| HMG20A   | -0.21385   |
| HMG20B   | -1.046361  |
| HMGB3    | -0.5364409 |
| HMGB4    | -2.4790313 |
| HMGCL    | -3.6890278 |
| HMGCR    | -2.3928194 |
| HMGCS1   | -2.9220152 |
| HMGCS2   | -6.650187  |
| HMGN1    | -0.5950732 |
| HMGN5    | -1.1691122 |
| HMOX2    | -1.6779151 |
| HMX1     | -1.149287  |
| HN1L     | -0.9336784 |
| HNF1A    | -4.958329  |
| HNF1B    | -1.099102  |
| HNF4A    | -4.1731153 |
| HNF4AOS  | -5.6364417 |
| HNMT     | -1.8936095 |
| HNRNPC   | -0.1907497 |
| HNRNPF   | -0.2300191 |
| HNRNPUL2 | -0.169641  |
| HOGA1    | -5.207117  |
| HOMER1   | -0.5780025 |
| HOMER2   | -3.024863  |
| HOOK1    | -1.2765629 |
| HOOK2    | -1.3305001 |
| HOOK3    | -0.7506843 |
| HORMAD1  | -1.7796507 |
| HORMAD2  | -1.1518402 |
| HOTTIP   | -1.6268129 |
| HOXA11   | -1.4162498 |
| HOXA2    | -0.3858116 |
| HOXB13   | -1.4693842 |
| HOXB9    | -0.9669118 |
| HOXC12   | -2.254962  |
| HOXC6    | -1.2003043 |
| HOXC8    | -1.4765649 |
| HOXC9    | -1.4716635 |
| HOXD11   | -1.3811564 |

|          |            |
|----------|------------|
| HOXD12   | -1.5986474 |
| HOXD3    | -2.8168638 |
| HP       | -1.3200312 |
| HP1BP3   | -0.5167151 |
| HPCA     | -1.3106394 |
| HPD      | -8.1612    |
| HPDL     | -1.4620426 |
| HPGD     | -2.7568803 |
| HPN      | -4.691192  |
| HPRT     | -0.2988949 |
| HPS1     | -0.6462085 |
| HPS3     | -0.3072696 |
| HPS4     | -0.6865602 |
| HPS6     | -0.2968078 |
| HPSE     | -0.7808232 |
| HPX      | -1.7000961 |
| HR       | -0.3062835 |
| HRAS     | -1.6120572 |
| HRASLS   | -1.9443021 |
| HRG      | -5.525778  |
| HRH4     | -0.9804881 |
| HRK      | -2.970553  |
| HRSP12   | -6.43196   |
| HS1BP3   | -1.8724995 |
| HS2ST1   | -1.1981578 |
| HS3ST2   | -1.0181711 |
| HS3ST3A1 | -2.0959108 |
| HS3ST3B1 | -1.5944242 |
| HS3ST4   | -2.7273002 |
| HS3ST6   | -0.449666  |
| HS6ST1   | -2.4406612 |
| HS6ST3   | -1.0371761 |
| HSBP1    | -0.8542447 |
| HSD11B1  | -3.842123  |
| HSD11B2  | -1.3385127 |
| HSD17B1  | -1.6645374 |
| HSD17B10 | -3.4768553 |
| HSD17B11 | -1.8472128 |
| HSD17B12 | -2.2722888 |
| HSD17B13 | -5.018888  |
| HSD17B2  | -7.2450123 |
| HSD17B3  | -1.905494  |
| HSD17B4  | -2.772193  |
| HSD17B6  | -11.133291 |
| HSD17B7  | -2.7079623 |



|          |            |
|----------|------------|
| HSD3B1   | -6.070076  |
| HSD3B2   | -1.2790446 |
| HSD3B3   | -12.564512 |
| HSD3B5   | -2.3897727 |
| HSD3B6   | -5.510487  |
| HSD3B7   | -3.467557  |
| HSDL2    | -2.5889945 |
| HSF1     | -0.5719647 |
| HSF2     | -1.9906263 |
| HSF4     | -2.070848  |
| HSFY2    | -1.4030392 |
| HSP90AA1 | -0.2420502 |
| HSP90AB1 | -0.956811  |
| HSP90B1  | -0.6129346 |
| HSPA1A   | -1.9404504 |
| HSPA4    | -0.4798985 |
| HSPA5    | -0.236721  |
| HSPA8    | -0.997139  |
| HSPA9    | -1.4230227 |
| HSPB11   | -0.8443937 |
| HSPB8    | -2.7274642 |
| HSPBP1   | -1.6967392 |
| HSPD1    | -2.0858212 |
| HSPE1    | -1.6266847 |
| HSPG2    | -0.839087  |
| HSPH1    | -0.4664245 |
| HTATIP2  | -3.615335  |
| HTR3B    | -1.1860831 |
| HTR4     | -2.1321127 |
| HTR5B    | -1.6999388 |
| HTR6     | -1.3624461 |
| HTRA2    | -0.8477755 |
| HUNK     | -0.5769467 |
| HUS1B    | -0.9185028 |
| HYAL1    | -2.9117107 |
| HYAL2    | -1.5687699 |
| HYAL4    | -1.6592546 |
| HYAL5    | -3.0137463 |
| HYI      | -3.9999003 |
| HYKK     | -4.7018423 |
| HYPK     | -0.806222  |
| IAH1     | -2.1440296 |
| IARS2    | -1.3587794 |
| IBA57    | -0.9724457 |
| IBSP     | -1.6333983 |

|          |            |
|----------|------------|
| ICAM4    | -0.4911377 |
| ICT1     | -1.3778052 |
| ID2      | -0.9823723 |
| ID4      | -0.7300239 |
| IDE      | -1.0012307 |
| IDH1     | -2.0608177 |
| IDH2     | -1.6758113 |
| IDH3A    | -0.7861099 |
| IDH3B    | -2.109323  |
| IDH3G    | -0.4718103 |
| IDI1     | -3.3602657 |
| IDI2     | -0.865072  |
| IDNK     | -1.7407074 |
| IDO2     | -7.165178  |
| IDUA     | -0.539959  |
| IFFO1    | -0.6234479 |
| IFI203   | -0.7842479 |
| IFI27    | -1.4669785 |
| IFI27L2B | -2.8967443 |
| IFI30    | -0.4890599 |
| IFITM2   | -1.0459309 |
| IFITM3   | -1.4180937 |
| IFITM7   | -0.9721003 |
| IFLTD1   | -1.694406  |
| IFNA13   | -1.6607263 |
| IFNA16   | -1.2639539 |
| IFNA2    | -0.6279583 |
| IFNA4    | -1.7775471 |
| IFNAR2   | -1.035244  |
| IFNB1    | -1.1921482 |
| IFNE     | -1.1663325 |
| IFNGR2   | -0.179843  |
| IFNL3    | -1.5056942 |
| IFRD2    | -2.335947  |
| IFT20    | -1.143569  |
| IFT22    | -0.3963397 |
| IFT27    | -1.3166709 |
| IFT46    | -0.9893727 |
| IFT52    | -1.1511192 |
| IFT88OS  | -1.2683554 |
| IGBP1    | -0.8592863 |
| IGBP1B   | -2.7052708 |
| IGDCC4   | -2.4244487 |
| IGF1     | -5.1407137 |
| IGF1OS   | -2.5421293 |

|          |            |
|----------|------------|
| IGF2BP3  | -3.9048142 |
| IGF2OS   | -1.0930586 |
| IGF2R    | -0.916883  |
| IGFALS   | -8.012356  |
| IGFBP1   | -0.7044888 |
| IGFBP2   | -6.0014124 |
| IGFBP4   | -4.3176003 |
| IGFBPL1  | -1.5429006 |
| IGFL3    | -0.9561229 |
| IGFN1    | -1.1942008 |
| IGHMBP2  | -0.3514614 |
| IGIP     | -1.1046429 |
| IGKV4-72 | -1.7674541 |
| IGLON5   | -1.6572058 |
| IGSF11   | -4.128628  |
| IGSF5    | -1.5638118 |
| IGSF8    | -0.1854711 |
| IGSF9    | -0.8558931 |
| IGTP     | -0.9380703 |
| IHH      | -2.2502944 |
| IIGP1    | -0.7037282 |
| IKBIP    | -0.6656137 |
| IKBKAP   | -0.1845751 |
| IKBKB    | -0.1970859 |
| IKBKG    | -1.1180139 |
| IKZF3    | -2.7016482 |
| IL11RA1  | -0.8354726 |
| IL13     | -1.6094317 |
| IL15     | -0.9206209 |
| IL15RA   | -0.6423073 |
| IL17RB   | -3.3848248 |
| IL17RC   | -2.160039  |
| IL18     | -1.0661893 |
| IL18BP   | -1.0400267 |
| IL1RAP   | -5.2056656 |
| IL1RAPL2 | -1.6317403 |
| IL20     | -1.4869359 |
| IL22RA1  | -1.9711428 |
| IL27     | -1.5565209 |
| IL27RA   | -0.5699296 |
| IL31RA   | -0.7320249 |
| IL5      | -0.6027372 |
| IL6RA    | -0.8410039 |
| ILD2R    | -1.1506302 |
| ILF3     | -0.316391  |

|        |            |
|--------|------------|
| ILK    | -0.558259  |
| ILKAP  | -0.5836849 |
| ILTIFB | -2.323699  |
| ILVBL  | -2.0725312 |
| IMMP1L | -1.0525265 |
| IMMP2L | -4.6987314 |
| IMMT   | -1.4785976 |
| IMP3   | -0.4950318 |
| IMPA1  | -1.7538462 |
| IMPA2  | -0.5649047 |
| IMPAD1 | -0.5962172 |
| IMPG1  | -1.1844678 |
| IMPG2  | -2.973839  |
| INCA1  | -4.954744  |
| INF2   | -0.887619  |
| ING4   | -1.1585083 |
| INHBA  | -1.7713327 |
| INHBC  | -7.509181  |
| INHBE  | -4.2215157 |
| INMT   | -3.5256548 |
| INPP1  | -1.1495628 |
| INPP5A | -0.3838267 |
| INPP5E | -0.6272326 |
| INPPL1 | -1.2067037 |
| INSC   | -4.0462704 |
| INSIG1 | -3.0422215 |
| INSIG2 | -3.189404  |
| INSL5  | -0.5824933 |
| INSM2  | -1.3339322 |
| INSR   | -1.0964594 |
| INSRR  | -2.0169013 |
| INTS1  | -1.3266301 |
| INTS10 | -0.5980687 |
| INTS3  | -1.1410077 |
| INTS4  | -0.981411  |
| INTS5  | -0.2410216 |
| INTS7  | -0.1747344 |
| INTS8  | -0.4981146 |
| INTU   | -0.7015476 |
| INVS   | -1.4425821 |
| IP6K1  | -0.7021132 |
| IPO11  | -0.8054342 |
| IPO4   | -0.786983  |
| IPO8   | -1.2431116 |
| IPP    | -1.4880011 |

|          |            |
|----------|------------|
| IQCC     | -1.383637  |
| IQCE     | -0.7444749 |
| IQCF5    | -1.7491896 |
| IQCG     | -0.9763567 |
| IQCJ     | -1.2793033 |
| IQGAP2   | -3.7394955 |
| IQGAP3   | -1.8408196 |
| IQSEC1   | -0.5484409 |
| IQSEC2   | -0.6098456 |
| IQSEC3   | -4.3543825 |
| IRAK1    | -0.3032308 |
| IRAK1BP1 | -1.230371  |
| IRAK2    | -1.048635  |
| IRAK4    | -0.3369722 |
| IRF2     | -0.2195697 |
| IRF2BP1  | -1.3134589 |
| IRF3     | -1.150342  |
| IRF6     | -1.7789173 |
| IRGC1    | -1.2676868 |
| IRGM1    | -0.7004757 |
| IRGM2    | -0.9460697 |
| IRGQ     | -0.4016633 |
| IRS1     | -3.454605  |
| IRS3     | -0.6627166 |
| IRS4     | -0.8562045 |
| IRX3OS   | -1.0948291 |
| ISCA1    | -1.2709184 |
| ISCA2    | -1.743804  |
| ISCU     | -0.2452445 |
| ISG20L2  | -0.3789625 |
| ISL1     | -1.2930605 |
| ISLR     | -1.1530795 |
| ISM2     | -2.3692322 |
| ISOC1    | -2.1684823 |
| ISOC2A   | -2.643236  |
| ISOC2B   | -2.27336   |
| IST1     | -0.3930888 |
| ISX      | -1.3655882 |
| ITCH     | -0.7999759 |
| ITFG1    | -1.4848928 |
| ITFG2    | -0.7804437 |
| ITFG3    | -1.9679747 |
| ITGA10   | -0.3393791 |
| ITGA5    | -0.3389888 |
| ITGA9    | -0.2351685 |

|          |            |
|----------|------------|
| ITGAD    | -0.534178  |
| ITGAL    | -0.1694441 |
| ITGB1BP1 | -0.2840929 |
| ITGB3BP  | -1.2552516 |
| ITGB5    | -1.9173579 |
| ITGB7    | -0.4354878 |
| ITIH1    | -5.6139507 |
| ITIH2    | -4.2461224 |
| ITIH3    | -3.199945  |
| ITIH4    | -1.9533377 |
| ITIH5    | -0.5041976 |
| ITM2B    | -1.8725047 |
| ITM2C    | -0.2140975 |
| ITPA     | -1.3723755 |
| ITPK1    | -0.895237  |
| ITPKA    | -1.1239438 |
| ITPR2    | -1.3208699 |
| ITPR3OS  | -1.2226701 |
| ITSN1    | -1.0242467 |
| IVD      | -3.2430253 |
| IVNS1ABP | -0.457613  |
| IYD      | -5.6255455 |
| IZUMO3   | -1.8136027 |
| IZUMO4   | -2.3822145 |
| JADE1    | -1.212595  |
| JAGN1    | -1.7908931 |
| JAK1     | -0.1340532 |
| JAKMIP2  | -3.2994785 |
| JAKMIP3  | -1.7433124 |
| JAZF1    | -1.1977346 |
| JKAMP    | -1.505364  |
| JMJD4    | -1.8601086 |
| JMJD7    | -1.8519907 |
| JMJD8    | -2.9352531 |
| JOSD1    | -1.6941419 |
| JOSD2    | -1.7852507 |
| JPH4     | -2.1588435 |
| JPX      | -1.0726361 |
| JRK      | -0.9599488 |
| JTB      | -1.407896  |
| JUNOS    | -0.9401298 |
| KALRN    | -0.6346119 |
| KANK1    | -0.6985669 |
| KANSL1L  | -0.5363679 |
| KANSL2   | -0.3184323 |

|         |            |
|---------|------------|
| KAP     | -0.6276891 |
| KARS    | -1.0076003 |
| KAT2A   | -1.5670581 |
| KAT2B   | -1.8971105 |
| KAT8    | -1.2713337 |
| KBTBD13 | -1.6512578 |
| KBTBD4  | -0.975246  |
| KBTBD7  | -0.9984729 |
| KCNA2   | -3.1526575 |
| KCNA4   | -0.5712228 |
| KCNA6   | -0.4069202 |
| KCNB1   | -1.3603702 |
| KCNC3   | -0.3735502 |
| KCND2   | -0.8639498 |
| KCND3OS | -2.5480263 |
| KCNE1   | -1.2661886 |
| KCNE1L  | -4.120969  |
| KCNF1   | -3.0680547 |
| KCNG2   | -2.5174077 |
| KCNG4   | -1.7369916 |
| KCNH4   | -0.5860846 |
| KCNH5   | -1.6355968 |
| KCNH6   | -2.2132742 |
| KCNH7   | -1.119992  |
| KCNH8   | -1.3920147 |
| KCNIP1  | -0.2222595 |
| KCNIP2  | -0.8084672 |
| KCNJ1   | -1.3953319 |
| KCNJ10  | -3.6662858 |
| KCNJ12  | -1.7873116 |
| KCNJ14  | -1.7925239 |
| KCNJ16  | -3.3502538 |
| KCNJ3   | -0.9266591 |
| KCNJ9   | -2.3230278 |
| KCNK10  | -1.6398644 |
| KCNK15  | -1.4415433 |
| KCNK16  | -1.7927909 |
| KCNK18  | -1.067837  |
| KCNK5   | -2.092146  |
| KCNK7   | -1.1046708 |
| KCNN1   | -0.9590287 |
| KCNN2   | -6.364468  |
| KCNQ2   | -1.2740388 |
| KCNQ3   | -2.0447907 |
| KCNQ5   | -1.5421355 |

|         |            |
|---------|------------|
| KCNV1   | -1.7806597 |
| KCNV2   | -1.5199842 |
| KCP     | -3.4900877 |
| KCTD14  | -0.8154922 |
| KCTD15  | -0.4445367 |
| KCTD16  | -1.638689  |
| KCTD17  | -0.6055732 |
| KCTD18  | -0.2430296 |
| KCTD2   | -1.0067396 |
| KCTD20  | -0.3650093 |
| KCTD21  | -0.5540962 |
| KCTD6   | -0.3500505 |
| KCTD7   | -1.5244489 |
| KDELC1  | -0.8719974 |
| KDELR1  | -1.5232806 |
| KDELR2  | -1.2364159 |
| KDM1B   | -2.223287  |
| KDM2A   | -0.2740908 |
| KDM2B   | -0.1887727 |
| KDM4A   | -0.2000923 |
| KDM4B   | -0.2637043 |
| KDM4D   | -1.4109585 |
| KDM5C   | -0.4232788 |
| KDM8    | -0.6425235 |
| KDR     | -0.4134007 |
| KDSR    | -0.7982969 |
| KEAP1   | -0.8268304 |
| KEG1    | -7.453129  |
| KERA    | -1.4976103 |
| KHDC1A  | -1.6835351 |
| KHDC1C  | -1.4251144 |
| KHDRBS2 | -2.9155567 |
| KHDRBS3 | -1.9983006 |
| KHK     | -5.1867466 |
| KHSRP   | -1.6129298 |
| KIF11   | -0.7193623 |
| KIF12   | -2.6202083 |
| KIF13B  | -1.5468817 |
| KIF17   | -0.915287  |
| KIF18A  | -1.0104413 |
| KIF18B  | -0.9223361 |
| KIF1B   | -1.1873708 |
| KIF1C   | -0.9462519 |
| KIF20A  | -1.8548982 |
| KIF20B  | -0.6159396 |



|         |            |
|---------|------------|
| KIF21A  | -1.6711898 |
| KIF22   | -0.5363512 |
| KIF24   | -0.4665113 |
| KIF26A  | -0.5622208 |
| KIF26B  | -0.7977729 |
| KIF2B   | -1.1972361 |
| KIF2C   | -0.8955963 |
| KIF3C   | -2.3919353 |
| KIF4    | -0.7333956 |
| KIF4-PS | -0.9523063 |
| KIF7    | -0.6785679 |
| KIFC1   | -1.6364386 |
| KIFC2   | -1.7539086 |
| KIFC3   | -1.8030534 |
| KIR3DL1 | -1.1147428 |
| KIRREL2 | -2.3609562 |
| KISS1   | -3.2924116 |
| KLB     | -7.8657804 |
| KLC4    | -2.2537956 |
| KLF1    | -4.3027744 |
| KLF12   | -3.2577913 |
| KLF15   | -2.096478  |
| KLHDC10 | -1.3007102 |
| KLHDC2  | -1.2984214 |
| KLHDC3  | -1.2243619 |
| KLHDC7A | -1.7731943 |
| KLHDC7B | -0.8277965 |
| KLHDC8A | -1.9236417 |
| KLHDC8B | -0.8661184 |
| KLHL10  | -1.6779873 |
| KLHL12  | -0.5197868 |
| KLHL13  | -2.3692503 |
| KLHL17  | -1.1259708 |
| KLHL22  | -0.6034021 |
| KLHL23  | -1.0593977 |
| KLHL25  | -1.19632   |
| KLHL26  | -0.3169632 |
| KLHL3   | -2.2513382 |
| KLHL34  | -2.0422773 |
| KLHL35  | -0.1413169 |
| KLHL36  | -1.2370424 |
| KLHL4   | -1.8761182 |
| KLHL8   | -0.9546065 |
| KLHL9   | -0.8800592 |
| CLK15   | -2.5238833 |

|           |            |
|-----------|------------|
| KLK1B1    | -1.4386406 |
| KLK1B11   | -1.5795    |
| KLK1B16   | -1.7351291 |
| KLK1B22   | -2.084212  |
| KLK1B24   | -0.7097623 |
| KLK1B3    | -1.0645988 |
| KLK1B4    | -1.8433614 |
| KLK1B7-PS | -2.1543236 |
| KLK1B8    | -1.2626545 |
| KLK5      | -1.1746399 |
| KLK7      | -0.9804936 |
| KLKB1     | -8.030532  |
| KLRA10    | -2.8120565 |
| KLRA12    | -0.2603869 |
| KLRA5     | -2.1050863 |
| KLRA6     | -1.2886422 |
| KLRB1-PS1 | -1.2651875 |
| KLRC2     | -1.4478681 |
| KLRE1     | -1.0933161 |
| KLRK1     | -1.5670354 |
| KMO       | -4.180956  |
| KMT2B     | -0.2456241 |
| KNG1      | -3.3913126 |
| KNG2      | -4.413828  |
| KNOP1     | -0.4427667 |
| KNSTRN    | -0.7852154 |
| KNTC1     | -1.1885295 |
| KPNA1     | -0.3764024 |
| KPNA2     | -0.5082631 |
| KPNA3     | -0.3807669 |
| KPNA6     | -0.5402579 |
| KPNA7     | -2.0137749 |
| KPNB1     | -1.0732675 |
| KPTN      | -2.1353498 |
| KRBA1     | -1.275444  |
| KRCC1     | -0.6995587 |
| KRT10     | -0.1822069 |
| KRT12     | -1.5870211 |
| KRT18     | -1.4591718 |
| KRT2      | -1.1594856 |
| KRT20     | -0.2176273 |
| KRT222    | -0.6125984 |
| KRT24     | -1.7582555 |
| KRT25     | -1.7597454 |
| KRT27     | -1.5634613 |

|            |            |
|------------|------------|
| KRT28      | -1.3033371 |
| KRT33B     | -1.6381919 |
| KRT35      | -0.9667206 |
| KRT36      | -1.8494842 |
| KRT39      | -1.5842412 |
| KRT71      | -1.0398884 |
| KRT72      | -1.2264972 |
| KRT73      | -1.87081   |
| KRT76      | -1.3632185 |
| KRT77      | -0.7122397 |
| KRT8       | -1.7189622 |
| KRT82      | -3.1801193 |
| KRT9       | -1.0193315 |
| KRTAP12-1  | -1.6447351 |
| KRTAP13-1  | -1.6034498 |
| KRTAP1-4   | -0.8432574 |
| KRTAP15    | -3.319427  |
| KRTAP17-1  | -1.171242  |
| KRTAP19-1  | -1.7342887 |
| KRTAP19-3  | -2.3326366 |
| KRTAP19-5  | -0.7375307 |
| KRTAP21-1  | -2.890701  |
| KRTAP28-10 | -1.7273791 |
| KRTAP31-2  | -1.611629  |
| KRTAP3-3   | -1.3208332 |
| KRTAP4-2   | -2.9138734 |
| KRTAP4-8   | -0.8068337 |
| KRTAP5-2   | -0.3146436 |
| KRTAP6-1   | -1.632148  |
| KRTAP8-1   | -1.0100636 |
| KRTCAP2    | -0.7386646 |
| KSR2       | -1.1634498 |
| KTI12      | -1.1060753 |
| KXD1       | -2.2088418 |
| KY         | -2.396464  |
| KYNU       | -5.079651  |
| L2HGDH     | -3.787463  |
| L3HYPDH    | -4.7275467 |
| L3MBTL2    | -1.4738019 |
| L7RN6      | -1.1903939 |
| LACC1      | -0.6508653 |
| LACE1      | -2.0076241 |
| LACTB      | -2.4363236 |
| LACTB2     | -3.1489668 |
| LAG3       | -0.220026  |

|         |            |
|---------|------------|
| LAGE3   | -1.9042706 |
| LAMA1   | -1.1886358 |
| LAMP1   | -1.3040934 |
| LAMP2   | -1.1521502 |
| LAMTOR1 | -1.3165865 |
| LAMTOR2 | -1.3578963 |
| LAMTOR4 | -2.0532918 |
| LAMTOR5 | -0.4043589 |
| LANCL1  | -0.6775394 |
| LAO1    | -1.6222997 |
| LAP3    | -1.9496889 |
| LAPTM4B | -0.2678604 |
| LARP1   | -0.6451097 |
| LARP1B  | -1.9668531 |
| LARP4   | -0.2993321 |
| LARS2   | -1.3706799 |
| LAS1L   | -0.7909069 |
| LASP1   | -0.481338  |
| LAT     | -0.3137593 |
| LBH     | -0.3728423 |
| LBP     | -1.5782056 |
| LCAT    | -4.9969106 |
| LCLAT1  | -2.3339543 |
| LCMT1   | -1.5036454 |
| LCMT2   | -1.5797629 |
| LCN11   | -2.9363995 |
| LCN12   | -0.4689446 |
| LCN5    | -0.9101956 |
| LCN8    | -1.9396834 |
| LCN9    | -1.6845684 |
| LCT     | -1.2825074 |
| LDHA    | -1.5075374 |
| LDHC    | -1.0343385 |
| LDHD    | -3.5262685 |
| LDLR    | -2.6948385 |
| LDLRAD2 | -1.6120026 |
| LDLRAD3 | -1.1989646 |
| LDLRAP1 | -1.6340799 |
| LEAP2   | -8.121006  |
| LECT1   | -2.8024173 |
| LECT2   | -8.690167  |
| LEFTY1  | -2.6264625 |
| LELP1   | -0.341306  |
| LEMD1   | -1.3110275 |
| LEMD2   | -0.2681704 |

|          |            |
|----------|------------|
| LENEP    | -1.2342606 |
| LENG1    | -0.446795  |
| LENG9    | -0.225564  |
| LEP      | -0.7476451 |
| LEPRE1   | -0.5256202 |
| LEPROT   | -0.3156829 |
| LEPROTL1 | -0.2365856 |
| LETM1    | -0.4899836 |
| LETMD1   | -1.5463996 |
| LGALS12  | -0.7036777 |
| LGALS2   | -2.1941848 |
| LGALS4   | -2.6511106 |
| LGALS6   | -2.9372923 |
| LGALS8   | -0.7916064 |
| LGALS9   | -3.0511842 |
| LGALSL   | -0.6003819 |
| LGI1     | -2.015221  |
| LGMN     | -0.5726705 |
| LGR4     | -1.6961043 |
| LGR5     | -3.9512253 |
| LGSN     | -1.7060859 |
| LHFPL4   | -0.6537309 |
| LHPP     | -3.2061772 |
| LHX1     | -1.5000231 |
| LHX2     | -5.7668138 |
| LHX6     | -0.854929  |
| LHX8     | -0.1637332 |
| LIAS     | -1.3074913 |
| LIFR     | -3.1319828 |
| LIG3     | -0.6317134 |
| LILRA5   | -1.5091133 |
| LIMD1    | -0.553679  |
| LIMD2    | -0.5370793 |
| LIMS2    | -1.4828053 |
| LIN37    | -0.9856    |
| LIN7A    | -6.7455826 |
| LIN7B    | -2.7275267 |
| LINGO1   | -3.1389003 |
| LINGO2   | -1.5891905 |
| LINGO3   | -1.1281564 |
| LIPA     | -2.7325816 |
| LIPC     | -6.934144  |
| LIPE     | -0.5221803 |
| LIPK     | -1.6949306 |
| LIPO4    | -2.033546  |

|            |            |
|------------|------------|
| LIPT1      | -2.4269733 |
| LIPT2      | -1.063107  |
| LLGL2      | -1.5319633 |
| LLPH       | -0.3996005 |
| LMAN1      | -1.94837   |
| LMAN2      | -1.1807389 |
| LMAN2L     | -1.326395  |
| LMBRD1     | -1.2710218 |
| LMBRD2     | -0.8159776 |
| LMF1       | -2.442017  |
| LMF2       | -0.7504587 |
| LMNA       | -0.1870709 |
| LMNB2      | -5.0456576 |
| LMO3       | -1.3914604 |
| LMOD2      | -0.5417085 |
| LMOD3      | -0.437902  |
| LMX1A      | -2.0897436 |
| LOC1000450 | -1.6109674 |
| LOC1000488 | -13.627169 |
| LOC1005025 | -1.8366697 |
| LOC1005030 | -0.973752  |
| LOC1005046 | -0.5430565 |
| LOC1008617 | -1.1502275 |
| LOC1010558 | -0.7722378 |
| LOC1010558 | -0.9546709 |
| LOC1010559 | -1.0101962 |
| LOC1010559 | -1.7186086 |
| LOC1010560 | -0.8410959 |
| LOC1026318 | -1.6048071 |
| LOC1026319 | -0.2014561 |
| LOC1026322 | -0.4274759 |
| LOC1026322 | -1.3239846 |
| LOC1026323 | -1.046376  |
| LOC1026324 | -0.4436545 |
| LOC1026324 | -2.7672944 |
| LOC1026324 | -1.4709301 |
| LOC1026327 | -0.7513609 |
| LOC1026328 | -2.3495648 |
| LOC1026330 | -1.6420076 |
| LOC1026330 | -2.1709752 |
| LOC1026331 | -1.000509  |
| LOC1026335 | -0.2922988 |
| LOC1026336 | -1.8248634 |
| LOC1026337 | -0.9318228 |
| LOC1026338 | -3.918003  |

LOC1026341: -1.4098549  
LOC1026345: -2.4981046  
LOC1026345: -1.1627905  
LOC1026346: -2.3838918  
LOC1026347: -0.4495549  
LOC1026350: -0.5823507  
LOC1026353: -1.8597093  
LOC1026354: -1.6150777  
LOC1026356: -0.9225874  
LOC1026356: -1.0919893  
LOC1026357: -2.4156106  
LOC1026362: -1.0126238  
LOC1026362: -0.4648643  
LOC1026366: -0.7380509  
LOC1026367: -1.1129999  
LOC1026368: -0.9322479  
LOC1026368: -1.6569028  
LOC1026369: -3.0806768  
LOC1026369: -1.1479545  
LOC1026370: -1.0927656  
LOC1026371: -0.3034511  
LOC1026372: -0.1608844  
LOC1026373: -1.0868475  
LOC1026374: -0.8897352  
LOC1026376: -1.0146503  
LOC1026377: -2.0578213  
LOC1026377: -0.8121586  
LOC1026378: -1.1853926  
LOC1026378: -0.9635406  
LOC1026379: -2.0839393  
LOC1026381: -1.8521361  
LOC1026385: -1.3641953  
LOC1026386: -0.7027082  
LOC1026386: -1.3952107  
LOC1026387: -0.5937986  
LOC1026387: -0.1954732  
LOC1026388: -1.9426367  
LOC1026388: -0.4926872  
LOC1026388: -7.4611177  
LOC1026389: -0.591352  
LOC1026389: -1.0066907  
LOC1026396: -1.2218876  
LOC1026396: -1.6308577  
LOC1026398: -3.9465683  
LOC1026398: -2.1709573

LOC1026399: -0.5976362  
LOC1026399: -0.2972345  
LOC1026399: -0.9438453  
LOC1026403: -1.3271785  
LOC1026407: -0.6216574  
LOC1026410: -1.6404285  
LOC1026410: -0.2845182  
LOC1026410: -0.8618937  
LOC1026412: -0.3541241  
LOC1026412: -1.1863983  
LOC1026412: -0.8177366  
LOC1026413: -8.322931  
LOC1026413: -0.8927493  
LOC1026413: -0.6483889  
LOC1026413: -0.4723516  
LOC1026413: -1.3332472  
LOC1026414: -0.8183928  
LOC1026415: -0.5998979  
LOC1026415: -4.5588517  
LOC1026416: -1.2636657  
LOC1026416: -2.4149566  
LOC1026416: -0.6812983  
LOC1026416: -3.7308483  
LOC1026416: -1.6533029  
LOC1026417: -1.7290759  
LOC1026418: -0.8566847  
LOC1026419: -1.8066196  
LOC1026419: -0.5098095  
LOC1026420: -1.9050369  
LOC1026420: -2.2912822  
LOC1026420: -2.747625  
LOC1026421: -1.761982  
LOC1026422: -0.3089957  
LOC1026422: -1.2949412  
LOC1026423: -2.0506747  
LOC1026424: -0.6023984  
LOC1026424: -1.8216572  
LOC1026424: -0.1974864  
LOC1026425: -0.7450676  
LOC1026426: -1.5548334  
LOC1026426: -0.6540275  
LOC1026427: -1.3614371  
LOC1026428: -0.6155639  
LOC1026429: -6.2057705  
LOC1026429: -0.6525703



|            |            |
|------------|------------|
| LOC1026429 | -1.8958223 |
| LOC1026430 | -1.1662376 |
| LOC1026431 | -1.3433738 |
| LOC1026431 | -1.0004139 |
| LOC1026432 | -0.6028314 |
| LOC171588  | -0.9954271 |
| LOC547349  | -1.7741165 |
| LOC630751  | -0.6973023 |
| LOC674896  | -0.5089536 |
| LOH12CR1   | -1.7076018 |
| LONP1      | -1.7778697 |
| LONP2      | -3.171328  |
| LONRF1     | -0.6229477 |
| LOXL2      | -0.6615229 |
| LOXL3      | -0.2713244 |
| LPAR5      | -2.0905128 |
| LPAR6      | -1.6887317 |
| LPCAT3     | -1.5791197 |
| LPCAT4     | -1.5671942 |
| LPGAT1     | -0.8447738 |
| LPIN1      | -1.1277647 |
| LPL        | -0.2797246 |
| LPP        | -0.5308909 |
| LRAT       | -3.430598  |
| LRBA       | -0.4499259 |
| LRCOL1     | -1.3314686 |
| LRFN3      | -4.3494077 |
| LRFN5      | -1.4111705 |
| LRG1       | -0.544312  |
| LRIG1      | -0.9986296 |
| LRIG3      | -1.3743644 |
| LRIT1      | -7.380804  |
| LRIT2      | -2.696157  |
| LRP1       | -1.7352543 |
| LRP11      | -0.6712747 |
| LRP1B      | -1.853312  |
| LRP2BP     | -0.860626  |
| LRP3       | -4.071825  |
| LRP5       | -1.5402045 |
| LRP6       | -0.4780736 |
| LRP8OS1    | -1.7910812 |
| LRPAP1     | -0.5459719 |
| LRPPRC     | -2.0185595 |
| LRR1       | -0.8110642 |
| LRRC14     | -1.2571368 |

|         |            |
|---------|------------|
| LRRC14B | -1.4407773 |
| LRRC16B | -2.049194  |
| LRRC17  | -1.5146892 |
| LRRC18  | -0.583699  |
| LRRC19  | -1.4257116 |
| LRRC20  | -1.2603884 |
| LRRC24  | -7.2445927 |
| LRRC28  | -1.6564822 |
| LRRC29  | -1.6557281 |
| LRRC3   | -6.230353  |
| LRRC30  | -1.1554141 |
| LRRC31  | -0.4732451 |
| LRRC39  | -1.5023048 |
| LRRC3B  | -0.2293243 |
| LRRC41  | -1.1936908 |
| LRRC42  | -1.6400423 |
| LRRC45  | -0.4212961 |
| LRRC4C  | -1.4233952 |
| LRRC55  | -0.9341703 |
| LRRC56  | -0.1966472 |
| LRRC57  | -0.5761781 |
| LRRC61  | -1.1328907 |
| LRRC66  | -1.0126126 |
| LRRC69  | -1.5865626 |
| LRRC7   | -2.0275187 |
| LRRC8D  | -0.4916267 |
| LRRIQ3  | -2.325328  |
| LRRIQ4  | -2.0970466 |
| LRRN3   | -0.6271908 |
| LRRTM2  | -1.2748001 |
| LRSAM1  | -1.6571889 |
| LRTM1   | -6.2550893 |
| LRWD1   | -0.1810155 |
| LSG1    | -0.6281309 |
| LSM1    | -1.3929634 |
| LSM10   | -1.5422812 |
| LSM11   | -0.7813242 |
| LSM14B  | -1.4859691 |
| LSM2    | -1.4786072 |
| LSM5    | -0.4181051 |
| LSM6    | -1.1099234 |
| LSM7    | -0.6082411 |
| LSMEM2  | -1.5178218 |
| LSR     | -3.0121527 |
| LSS     | -2.5447483 |

|         |            |
|---------|------------|
| LST1    | -0.6721506 |
| LTA4H   | -1.1158934 |
| LTBR    | -1.2358527 |
| LTK     | -0.3590338 |
| LTN1    | -0.5173287 |
| LUC7L   | -0.4634724 |
| LUC7L2  | -1.0143123 |
| LUM     | -1.4279943 |
| LURAP1L | -1.6775298 |
| LUZP2   | -2.2690506 |
| LUZP4   | -1.6192031 |
| LY6D    | -1.583529  |
| LY6E    | -0.3098073 |
| LY6G    | -0.9670587 |
| LY6G5C  | -1.1344111 |
| LY6G6F  | -1.9404001 |
| LY86    | -0.6390615 |
| LY9     | -1.1063969 |
| LY96    | -0.3187408 |
| LYG1    | -1.2927089 |
| LYPD1   | -1.606123  |
| LYPD8   | -1.389858  |
| LYPLA1  | -2.52208   |
| LYPLA2  | -0.7131772 |
| LYPLAL1 | -4.4010763 |
| LYRM1   | -0.5983653 |
| LYRM4   | -0.8677454 |
| LYRM5   | -2.7461739 |
| LYRM7   | -1.7103653 |
| LYRM9   | -3.0427275 |
| LYSMD1  | -0.9156046 |
| LYSMD4  | -1.2690506 |
| LZIC    | -0.2269564 |
| M6PR    | -0.6034045 |
| MAB21L1 | -0.967912  |
| MAB21L2 | -1.7949665 |
| MACROD1 | -3.0205894 |
| MACROD2 | -2.186747  |
| MAD1L1  | -1.6269412 |
| MAD2L1  | -0.7467506 |
| MAD2L2  | -1.1472087 |
| MADD    | -0.9768181 |
| MAEL    | -1.6431861 |
| MAF     | -2.1095877 |
| MAF1    | -0.2501459 |

|            |            |
|------------|------------|
| MAFB       | -2.0187387 |
| MAFG       | -0.3025317 |
| MAGEA10    | -1.5730305 |
| MAGEA3     | -1.8076739 |
| MAGEA5     | -0.9161136 |
| MAGEA6     | -1.6763401 |
| MAGEA8     | -1.5244806 |
| MAGEB1     | -1.990704  |
| MAGEB16-PS | -1.1278608 |
| MAGEB18    | -3.353495  |
| MAGEB5     | -1.7067394 |
| MAGED1     | -1.6715426 |
| MAGED2     | -0.5715885 |
| MAGEE2     | -2.916872  |
| MAGEH1     | -0.4143548 |
| MAGIX      | -4.701687  |
| MAGT1      | -0.6082521 |
| MALSU1     | -0.8814025 |
| MAMDC2     | -0.3796403 |
| MAMDC4     | -1.0413728 |
| MAN1A      | -2.121561  |
| MAN1A2     | -0.4856472 |
| MAN1B1     | -0.4217024 |
| MAN2A1     | -1.2011256 |
| MAN2A2     | -0.7202392 |
| MAN2B1     | -1.6517591 |
| MAN2B2     | -2.4353228 |
| MAN2C1     | -0.3289833 |
| MAN2C1OS   | -1.495924  |
| MANBA      | -2.02205   |
| MANEA      | -1.2112627 |
| MANF       | -0.3713746 |
| MANSC1     | -0.3230848 |
| MAOA       | -0.5912833 |
| MAOB       | -5.0402117 |
| MAP1LC3A   | -0.8429713 |
| MAP2K2     | -1.7130198 |
| MAP2K3     | -1.0475259 |
| MAP2K4     | -0.5316453 |
| MAP2K5     | -1.2257428 |
| MAP2K6     | -4.39274   |
| MAP2K7     | -0.5321293 |
| MAP3K10    | -1.5328407 |
| MAP3K11    | -0.8509026 |
| MAP3K13    | -0.9896238 |

|           |            |
|-----------|------------|
| MAP3K2    | -0.6196926 |
| MAP3K4    | -1.5386167 |
| MAP3K5    | -0.6992288 |
| MAP3K7CL  | -2.8347774 |
| MAP4K2    | -0.8729761 |
| MAP4K3    | -0.3090968 |
| MAPK14    | -1.5350285 |
| MAPK15    | -1.3190682 |
| MAPK1IP1L | -0.6525655 |
| MAPK3     | -0.497015  |
| MAPK4     | -2.0280104 |
| MAPK8     | -0.7175446 |
| MAPK8IP1  | -0.7962394 |
| MAPK9     | -1.5541577 |
| MAPKAP1   | -1.2306318 |
| MAPKAPK5  | -0.8970194 |
| MAPRE3    | -1.773551  |
| MARCO     | -0.6250129 |
| MARS      | -0.5594506 |
| MARVELD1  | -1.4189868 |
| MARVELD2  | -0.8283191 |
| MASP1     | -5.5993795 |
| MASP2     | -5.6172276 |
| MAST1     | -2.4064844 |
| MAST3     | -1.4375191 |
| MASTL     | -1.207356  |
| MAT1A     | -3.8178391 |
| MAT2B     | -0.3392158 |
| MATK      | -0.9282661 |
| MATN3     | -1.5256627 |
| MAU2      | -0.5417409 |
| MAVS      | -3.0458999 |
| MAZ       | -0.4751043 |
| MB21D2    | -0.4905613 |
| MBD3      | -1.1061115 |
| MBL1      | -4.603528  |
| MBL2      | -6.813462  |
| MBLAC1    | -1.3976672 |
| MBLAC2    | -3.2191548 |
| MBOAT7    | -0.7269673 |
| MC2R      | -1.4316797 |
| MC3R      | -0.8193846 |
| MC4R      | -1.7070241 |
| MCAT      | -1.7433677 |
| MCC       | -1.4113097 |

|          |            |
|----------|------------|
| MCCC1    | -2.399086  |
| MCCC2    | -3.3642497 |
| MCEE     | -3.4561663 |
| MCF2     | -1.6331849 |
| MCFD2    | -2.248753  |
| MCHR1    | -0.805912  |
| MCIDAS   | -0.6311278 |
| MCM10    | -2.4781737 |
| MCM2     | -0.303494  |
| MCM3AP   | -0.5030124 |
| MCM5     | -0.4479227 |
| MCM7     | -0.5455313 |
| MCMD2C2  | -3.393696  |
| MCOLN1   | -0.7793522 |
| MCPT1    | -1.0885088 |
| MCPT-PS1 | -1.4420371 |
| MCTS1    | -0.7825131 |
| MCTS2    | -1.6107373 |
| MCU      | -0.6790698 |
| MCUR1    | -0.9841933 |
| MDH1     | -3.0297012 |
| MDH2     | -0.8087916 |
| MDP1     | -0.8406978 |
| ME1      | -1.7500648 |
| MEA1     | -1.5585065 |
| MECOM    | -1.5621362 |
| MECR     | -2.5939696 |
| MED11    | -0.2335253 |
| MED12L   | -1.0085566 |
| MED16    | -1.1072884 |
| MED18    | -0.2461782 |
| MED19    | -0.2558208 |
| MED20    | -0.6287222 |
| MED22    | -1.2186298 |
| MED25    | -1.631733  |
| MED28    | -0.5533433 |
| MED29    | -1.7470698 |
| MED6     | -0.4440417 |
| MED7     | -0.1889195 |
| MED8     | -1.0007577 |
| MED9     | -0.3456979 |
| MEDAG    | -0.8736215 |
| MEG3     | -0.6225007 |
| MEGF11   | -0.4668365 |
| MEGF9    | -0.2173314 |

|             |            |
|-------------|------------|
| MEIOB       | -5.863386  |
| MEIS1       | -0.3100452 |
| MEIS3       | -0.2431681 |
| MEMO1       | -0.7969894 |
| MEN1        | -1.2254639 |
| MEP1A       | -1.3221381 |
| MEPE        | -0.1897326 |
| MERTK       | -0.6585403 |
| MESDC2      | -0.6710777 |
| MEST        | -1.2708774 |
| MET         | -1.2936211 |
| METAP1      | -0.9080391 |
| METAP1D     | -3.2233737 |
| METRN       | -1.5694675 |
| METTLL1     | -0.4677677 |
| METTLL10    | -0.3294845 |
| METTLL11B   | -2.3163087 |
| METTLL13    | -1.7433476 |
| METTLL15    | -1.8827956 |
| METTLL16    | -0.4818311 |
| METTLL17    | -2.188746  |
| METTLL18    | -0.7595987 |
| METTLL2     | -0.8804677 |
| METTLL20    | -1.0129423 |
| METTLL21A   | -1.6291237 |
| METTLL22    | -2.1411514 |
| METTLL23    | -1.0367932 |
| METTLL4     | -0.6807804 |
| METTLL5     | -2.0278955 |
| METTLL7A2   | -0.9775305 |
| METTLL7A2HI | -2.6063623 |
| METTLL7A3   | -0.6324973 |
| METTLL7B    | -6.7695303 |
| METTLL8     | -1.5754797 |
| METTLL9     | -0.8394585 |
| MFHAS1      | -0.6523356 |
| MFI2        | -2.4663374 |
| MFN1        | -1.3593364 |
| MFN2        | -1.7296371 |
| MFSD1       | -0.722342  |
| MFSD11      | -1.3874164 |
| MFSD12      | -1.292234  |
| MFSD2A      | -3.0530548 |
| MFSD2B      | -0.4417796 |
| MFSD3       | -3.5270152 |

|         |            |
|---------|------------|
| MFSD5   | -0.4381466 |
| MFSD7C  | -1.502265  |
| MFSD8   | -1.08813   |
| MFSD9   | -3.0606966 |
| MGAM    | -3.4142694 |
| MGAT1   | -1.0201125 |
| MGAT2   | -0.9604807 |
| MGAT4B  | -1.6105552 |
| MGAT4C  | -1.6555622 |
| MGAT5B  | -1.0400395 |
| MGL2    | -0.1520777 |
| MGLL    | -4.2136245 |
| MGME1   | -3.349988  |
| MGMT    | -3.9663725 |
| MGRN1   | -0.3483853 |
| MGST1   | -2.8187284 |
| MGST2   | -2.0130758 |
| MGST3   | -1.8921032 |
| MIA2    | -3.943311  |
| MIA3    | -1.5859146 |
| MIB2    | -1.1567907 |
| MICAL3  | -0.73382   |
| MICALL2 | -0.8645825 |
| MICU1   | -0.4741073 |
| MICU2   | -0.4168434 |
| MID1    | -0.2491994 |
| MID1IP1 | -0.5893788 |
| MIEF1   | -0.6161094 |
| MIEF2   | -1.3368065 |
| MIEN1   | -2.1558495 |
| MIER2   | -0.9904413 |
| MIF     | -1.5036936 |
| MIF4GD  | -0.6714101 |
| MIIP    | -0.9825373 |
| MILR1   | -0.9534721 |
| MINA    | -0.8396821 |
| MINK1   | -0.673779  |
| MINOS1  | -0.8035097 |
| MINPP1  | -1.6411977 |
| MIOX    | -4.763569  |
| MIP     | -2.954612  |
| MIPEP   | -2.2913663 |
| MIRG    | -1.7849097 |
| MKKS    | -1.9849119 |
| MKL2    | -0.5295453 |



|        |            |
|--------|------------|
| MKLN1  | -0.9312997 |
| MKNK2  | -0.167367  |
| MKRN2  | -1.0776758 |
| MLEC   | -1.5393701 |
| MLF2   | -1.3130279 |
| MLH1   | -1.4552498 |
| MLH3   | -0.9669321 |
| MLLT1  | -0.251152  |
| MLST8  | -1.1559715 |
| MLX    | -1.5263634 |
| MLXIPL | -4.3684382 |
| MLYCD  | -2.7656956 |
| MMAA   | -2.2721658 |
| MMAB   | -3.1801417 |
| MMACHC | -2.2869964 |
| MMADHC | -0.7905588 |
| MMD    | -2.882689  |
| MMD2   | -7.5815344 |
| MME    | -0.4990883 |
| MMEL1  | -1.9235101 |
| MMGT1  | -0.6303511 |
| MMP10  | -1.2672129 |
| MMP15  | -0.8719735 |
| MMP19  | -0.5649123 |
| MMP1B  | -1.7375205 |
| MMP21  | -1.9286842 |
| MMP24  | -0.311985  |
| MMP27  | -1.0008187 |
| MMP28  | -1.5958645 |
| MMRN2  | -0.4531608 |
| MMS22L | -0.9401999 |
| MN1    | -2.1138737 |
| MNAT1  | -0.2582893 |
| MND1   | -2.1480365 |
| MNX1   | -1.0352128 |
| MOB2   | -0.9096036 |
| MOB3B  | -1.199738  |
| MOB3C  | -0.5798466 |
| MOBP   | -2.480257  |
| MOCOS  | -2.7097716 |
| MOCS1  | -1.0849209 |
| MOCS2  | -2.525539  |
| MOCS3  | -0.8456698 |
| MOGAT2 | -3.082892  |
| MOGS   | -1.0778389 |

|          |            |
|----------|------------|
| MON1A    | -1.7291455 |
| MORC2B   | -0.6749802 |
| MORC4    | -1.3735015 |
| MORF4L1  | -0.4209523 |
| MORF4L2  | -0.3328672 |
| MORN1    | -0.4137845 |
| MORN2    | -2.2994192 |
| MOS      | -1.6824617 |
| MOSPD2   | -1.2350388 |
| MOSPD3   | -2.307313  |
| MOSPD4   | -1.6143003 |
| MOV10    | -2.234673  |
| MPC1     | -2.677608  |
| MPC2     | -3.6643739 |
| MPDU1    | -1.8615665 |
| MPDZ     | -1.1450517 |
| MPEG1    | -0.5538254 |
| MPG      | -1.0897455 |
| MPHOSPH9 | -0.4978213 |
| MPI      | -1.6567245 |
| MPLKIP   | -1.219202  |
| MPND     | -2.2516913 |
| MPO      | -1.6761198 |
| MPP1     | -1.301795  |
| MPP4     | -2.6549032 |
| MPP6     | -2.2475376 |
| MPPE1    | -1.5384398 |
| MPST     | -3.4103894 |
| MPTX1    | -1.7695875 |
| MPV17    | -1.3184004 |
| MPV17L   | -3.0599399 |
| MPV17L2  | -0.9720693 |
| MPZL2    | -2.276538  |
| MR1      | -0.9814775 |
| MRAP     | -4.011363  |
| MRC1     | -0.5356312 |
| MREG     | -3.149601  |
| MRFAP1   | -0.4923296 |
| MRGBP    | -0.3125482 |
| MRGPRA1  | -1.6036663 |
| MRGPRA9  | -1.7322998 |
| MRGPRB1  | -1.6406496 |
| MRGPRB2  | -1.6193573 |
| MRGPRB8  | -1.680254  |
| MRGPRD   | -1.3521919 |

|         |            |
|---------|------------|
| MRGPRE  | -1.202327  |
| MRGPRH  | -1.6352048 |
| MRGPRX1 | -1.4200335 |
| MRI1    | -2.410874  |
| MRO     | -0.8828664 |
| MROH2A  | -3.2746477 |
| MROH2B  | -3.8421805 |
| MROH4   | -2.1343322 |
| MROH5   | -0.1754217 |
| MRPL1   | -1.8265083 |
| MRPL10  | -1.9183655 |
| MRPL11  | -1.6765819 |
| MRPL12  | -3.1166377 |
| MRPL13  | -1.6444955 |
| MRPL14  | -2.1872401 |
| MRPL15  | -2.6569052 |
| MRPL16  | -2.0562677 |
| MRPL17  | -1.6066117 |
| MRPL18  | -1.5077949 |
| MRPL19  | -1.3330903 |
| MRPL2   | -1.8311076 |
| MRPL21  | -1.0536675 |
| MRPL22  | -1.6478639 |
| MRPL23  | -1.7111931 |
| MRPL24  | -1.1155272 |
| MRPL27  | -1.8078547 |
| MRPL28  | -2.2380586 |
| MRPL30  | -1.3153348 |
| MRPL32  | -1.0973783 |
| MRPL34  | -2.0520253 |
| MRPL35  | -2.248416  |
| MRPL36  | -1.3553038 |
| MRPL37  | -1.7359719 |
| MRPL38  | -2.1803799 |
| MRPL39  | -1.415163  |
| MRPL4   | -1.4958396 |
| MRPL40  | -1.3510776 |
| MRPL41  | -1.111454  |
| MRPL42  | -2.0375361 |
| MRPL43  | -1.2842016 |
| MRPL44  | -1.5902886 |
| MRPL45  | -0.9810948 |
| MRPL46  | -1.5322251 |
| MRPL47  | -1.1637578 |
| MRPL48  | -1.177743  |

|         |            |
|---------|------------|
| MRPL49  | -1.9991059 |
| MRPL50  | -2.0023756 |
| MRPL51  | -1.0799122 |
| MRPL52  | -0.5920849 |
| MRPL53  | -1.3801308 |
| MRPL54  | -0.9075556 |
| MRPL55  | -1.5997577 |
| MRPL57  | -0.8059897 |
| MRPL9   | -1.2115312 |
| MRPS10  | -1.3525805 |
| MRPS11  | -1.9293723 |
| MRPS12  | -1.9679894 |
| MRPS14  | -1.1346402 |
| MRPS15  | -1.6783628 |
| MRPS16  | -1.7457671 |
| MRPS17  | -0.8537941 |
| MRPS18A | -0.894495  |
| MRPS18B | -1.5100036 |
| MRPS18C | -0.5456076 |
| MRPS2   | -2.0230541 |
| MRPS21  | -1.1935406 |
| MRPS22  | -1.6555948 |
| MRPS23  | -0.9875212 |
| MRPS24  | -2.0337887 |
| MRPS25  | -1.0153198 |
| MRPS26  | -1.0857587 |
| MRPS27  | -2.4028745 |
| MRPS28  | -1.427979  |
| MRPS30  | -1.5007048 |
| MRPS31  | -2.285636  |
| MRPS33  | -1.1464391 |
| MRPS34  | -1.9136162 |
| MRPS35  | -1.8639379 |
| MRPS36  | -1.019495  |
| MRPS5   | -1.8549557 |
| MRPS7   | -1.7268744 |
| MRPS9   | -0.7069249 |
| MRS2    | -0.6655302 |
| MRTO4   | -0.2227345 |
| MS4A10  | -1.2679043 |
| MS4A13  | -1.4555316 |
| MS4A4C  | -0.859406  |
| MS4A5   | -1.3096704 |
| MSANTD4 | -0.6511331 |
| MSH2    | -0.6601424 |

|         |            |
|---------|------------|
| MSH3    | -0.8188863 |
| MSH4    | -1.620806  |
| MSH5    | -2.3625233 |
| MSL1    | -0.3175559 |
| MSMB    | -1.0627117 |
| MSMO1   | -2.411337  |
| MSMP    | -1.8193023 |
| MSRA    | -3.6452012 |
| MSRB1   | -1.8980818 |
| MSRB2   | -2.0139322 |
| MST1    | -5.2526217 |
| MSTO1   | -0.708931  |
| MSX3    | -1.754684  |
| MT1     | -0.6448641 |
| MT3     | -0.7940168 |
| MTA1    | -0.7134681 |
| MTA3    | -1.4841924 |
| MTAG2   | -1.9757686 |
| MTAP    | -2.628932  |
| MTCH2   | -2.3520584 |
| MTCP1   | -0.3800833 |
| MTERF1A | -0.6689153 |
| MTERF1B | -0.6868618 |
| MTERFD1 | -0.8713679 |
| MTERFD2 | -1.4507585 |
| MTERFD3 | -2.0826132 |
| MTF1    | -0.203537  |
| MTFMT   | -1.2984467 |
| MTFP1   | -4.5192795 |
| MTFR1   | -2.4637313 |
| MTFR1L  | -0.9419642 |
| MTFR2   | -0.9044685 |
| MTG1    | -2.1575155 |
| MTG2    | -1.9149327 |
| MTHFD1  | -3.9249263 |
| MTHFR   | -1.0153232 |
| MTHFS   | -2.1637259 |
| MTHFSD  | -1.5708983 |
| MTIF3   | -1.9455369 |
| MTL5    | -1.9241796 |
| MTM1    | -0.4490171 |
| MTMR1   | -0.6647201 |
| MTMR10  | -1.2308469 |
| MTMR11  | -2.642351  |
| MTMR14  | -0.4950171 |

|          |            |
|----------|------------|
| MTMR2    | -0.1580272 |
| MTMR4    | -1.5348811 |
| MTMR7    | -3.5742953 |
| MTMR9    | -0.1565499 |
| MTNR1A   | -2.2322497 |
| MTNR1B   | -1.907398  |
| MTO1     | -1.7741146 |
| MTOR     | -0.6743071 |
| MTPAP    | -0.6850705 |
| MTPN     | -0.2664824 |
| MTRF1L   | -0.6219745 |
| MTSS1    | -1.810009  |
| MTSS1L   | -0.277693  |
| MTPP     | -6.0962944 |
| MTUS1    | -0.4137516 |
| MTX1     | -1.901299  |
| MTX2     | -1.8714347 |
| MTX3     | -1.9094658 |
| MUC19    | -1.3486991 |
| MUC3     | -1.2596607 |
| MUG1     | -5.6442366 |
| MUG2     | -6.041017  |
| MUL1     | -0.8217301 |
| MUM1     | -0.6367264 |
| MUP1     | -12.535407 |
| MUP17    | -13.823453 |
| MUP19    | -13.628943 |
| MUP2     | -10.921619 |
| MUP20    | -8.2479725 |
| MUP21    | -8.202998  |
| MUP3     | -8.644036  |
| MUP4     | -9.984295  |
| MUP5     | -10.871084 |
| MUP6     | -5.309969  |
| MUP-PS12 | -10.971701 |
| MUS81    | -1.6070819 |
| MUT      | -2.6850429 |
| MVD      | -1.8519998 |
| MVK      | -2.5809164 |
| MXD3     | -2.089268  |
| MXI1     | -1.2573371 |
| MYCBP    | -1.2144675 |
| MYCL     | -3.0147476 |
| MYCN     | -1.7365522 |
| MYCS     | -1.390651  |

|          |            |
|----------|------------|
| MYCT1    | -1.5994375 |
| MYEOV2   | -0.7224064 |
| MYF5     | -1.4268699 |
| MYG1     | -1.6254287 |
| MYH10    | -0.4348273 |
| MYH13    | -1.3449962 |
| MYH15    | -2.1971354 |
| MYL10    | -1.7464769 |
| MYL12B   | -0.2922115 |
| MYL6     | -0.4968391 |
| MYL6B    | -0.88503   |
| MYLIP    | -0.4001765 |
| MYLPF    | -1.2922409 |
| MYNN     | -0.1738534 |
| MYO15    | -0.7699459 |
| MYO16    | -1.4905589 |
| MYO18A   | -0.2367659 |
| MYO19    | -0.7321453 |
| MYO1B    | -1.6063876 |
| MYO1E    | -0.548636  |
| MYO3A    | -1.3717527 |
| MYO5B    | -0.7393284 |
| MYO6     | -0.935411  |
| MYO7A    | -1.7287273 |
| MYO7B    | -3.9884555 |
| MYPN     | -2.6021311 |
| MYPOP    | -1.1638355 |
| MYRFL    | -3.3254995 |
| MYT1     | -1.6602831 |
| MYT1L    | -2.0171375 |
| MZF1     | -0.3380575 |
| MZT2     | -1.6825953 |
| N4BP2L1  | -1.7540128 |
| N4BP2OS  | -1.1814263 |
| N6AMT1   | -0.8468485 |
| N6AMT2   | -0.9968596 |
| NAA10    | -1.7590771 |
| NAA11    | -2.5778217 |
| NAA30    | -0.193049  |
| NAA35    | -0.6953821 |
| NAA38    | -1.4140587 |
| NAA40    | -0.7807474 |
| NAA50    | -0.6631393 |
| NAA60    | -1.961925  |
| NAALADL1 | -1.4027762 |

|          |            |
|----------|------------|
| NAALADL2 | -2.1109674 |
| NAB2     | -1.2579527 |
| NABP2    | -1.239152  |
| NACA     | -0.3260193 |
| NACC1    | -0.3899503 |
| NACC2    | -1.3242626 |
| NADK     | -0.6480694 |
| NADK2    | -4.447686  |
| NADSYN1  | -3.5153766 |
| NAE1     | -0.2649198 |
| NAGA     | -1.2947283 |
| NAGK     | -0.6974163 |
| NAGLU    | -2.2408195 |
| NAGPA    | -0.8198781 |
| NAGS     | -6.2335925 |
| NAIF1    | -1.4440367 |
| NAIP5    | -0.7675934 |
| NAIP7    | -0.5490012 |
| NALCN    | -1.7669609 |
| NANOS3   | -3.536319  |
| NANP     | -3.0498524 |
| NANS     | -0.3512712 |
| NAP1L2   | -0.9953346 |
| NAP1L3   | -1.3900003 |
| NAP1L5   | -1.5089822 |
| NAPA     | -0.3893876 |
| NAPG     | -0.5911183 |
| NAPRT1   | -4.8343406 |
| NARF     | -2.4908376 |
| NARFL    | -1.9350796 |
| NARG2    | -1.2158906 |
| NARS2    | -0.5652642 |
| NAT1     | -2.2483888 |
| NAT10    | -0.9439359 |
| NAT2     | -2.6256504 |
| NAT3     | -0.9342294 |
| NAT6     | -2.4617662 |
| NAT8     | -4.688471  |
| NAT9     | -1.4272914 |
| NAV2     | -1.410383  |
| NBAS     | -0.4622746 |
| NBR1     | -0.7121368 |
| NCALD    | -0.9714932 |
| NCAPD2   | -0.2505961 |
| NCAPD3   | -0.5666556 |



|         |            |
|---------|------------|
| NCAPG   | -2.5915873 |
| NCAPH2  | -0.6288714 |
| NCEH1   | -0.2743216 |
| NCKAP1  | -0.5015273 |
| NCKIPSD | -0.6618724 |
| NCLN    | -1.4837856 |
| NCMAP   | -0.8027237 |
| NCOA1   | -0.2210493 |
| NCOA2   | -0.9266806 |
| NCOA3   | -0.3971491 |
| NCOA4   | -1.6961322 |
| NCOA5   | -0.3790698 |
| NCTC1   | -0.8281965 |
| ND1     | -2.1445274 |
| ND2     | -1.7263212 |
| ND3     | -1.6709018 |
| ND4     | -1.1991782 |
| ND4L    | -1.986103  |
| ND5     | -1.7262497 |
| NDC1    | -1.5942934 |
| NDFIP1  | -1.3467307 |
| NDFIP2  | -1.6474462 |
| NDNL2   | -0.1512103 |
| NDOR1   | -0.2840395 |
| NDRG2   | -4.299885  |
| NDRG3   | -0.8391876 |
| NDST1   | -0.4663434 |
| NDST2   | -1.6775918 |
| NDST3   | -1.6774006 |
| NDST4   | -2.0284905 |
| NDUFA1  | -1.493186  |
| NDUFA10 | -1.4657235 |
| NDUFA11 | -1.1539159 |
| NDUFA12 | -1.3949881 |
| NDUFA13 | -2.0414014 |
| NDUFA2  | -1.734127  |
| NDUFA3  | -1.7482853 |
| NDUFA4  | -2.2179527 |
| NDUFA5  | -1.7427015 |
| NDUFA6  | -2.2494588 |
| NDUFA7  | -1.7395215 |
| NDUFA8  | -1.9953008 |
| NDUFA9  | -2.4068604 |
| NDUFAB1 | -2.0445948 |
| NDUFAF1 | -1.8987842 |

|         |            |
|---------|------------|
| NDUFAF2 | -1.7333946 |
| NDUFAF3 | -1.2654996 |
| NDUFAF4 | -1.6085124 |
| NDUFAF5 | -1.3579216 |
| NDUFAF6 | -3.2949977 |
| NDUFAF7 | -1.3003559 |
| NDUFB10 | -2.2630954 |
| NDUFB11 | -2.056312  |
| NDUFB2  | -1.6409669 |
| NDUFB3  | -1.1944189 |
| NDUFB4  | -1.7627492 |
| NDUFB5  | -1.9086466 |
| NDUFB6  | -1.9179058 |
| NDUFB7  | -1.8714385 |
| NDUFB8  | -1.8332615 |
| NDUFB9  | -2.0913467 |
| NDUFC1  | -1.4938593 |
| NDUFC2  | -1.187758  |
| NDUFS1  | -1.755436  |
| NDUFS2  | -1.7579713 |
| NDUFS3  | -1.815361  |
| NDUFS4  | -1.746285  |
| NDUFS5  | -1.7605028 |
| NDUFS6  | -2.1865058 |
| NDUFS7  | -1.5099497 |
| NDUFS8  | -2.1904259 |
| NDUFV1  | -2.1401901 |
| NDUFV2  | -1.7764063 |
| NDUFV3  | -2.3907847 |
| NECAB1  | -3.3852756 |
| NECAB2  | -1.1799169 |
| NECAB3  | -1.1340756 |
| NECAP1  | -1.3657398 |
| NEDD1   | -0.5679994 |
| NEDD4   | -0.9697552 |
| NEFL    | -1.3907213 |
| NEFM    | -1.1927941 |
| NEGR1   | -1.2642462 |
| NEIL2   | -0.3893893 |
| NEIL3   | -0.9137189 |
| NEK2    | -0.3668566 |
| NEK3    | -0.5746074 |
| NEK4    | -0.9409971 |
| NEK6    | -0.7680154 |
| NELFA   | -0.5363951 |

|           |            |
|-----------|------------|
| NELFCD    | -0.916121  |
| NELFE     | -1.2690158 |
| NELL2     | -2.0520413 |
| NENF      | -0.4211183 |
| NEPN      | -1.3281062 |
| NESPAS    | -1.7230878 |
| NETO1     | -1.5488856 |
| NEU1      | -1.1786432 |
| NEU2      | -2.1410358 |
| NEU3      | -0.8530073 |
| NEURL1B   | -0.9996328 |
| NEURL2    | -0.7294903 |
| NEUROD1   | -2.6538668 |
| NEUROD4   | -1.7078276 |
| NEUROD6   | -1.6063654 |
| NFIA      | -1.1322978 |
| NFIB      | -1.0245752 |
| NFIC      | -1.80761   |
| NFIX      | -1.1392136 |
| NFKBIL1   | -0.3545089 |
| NFS1      | -2.1346874 |
| NFU1      | -1.7850108 |
| NFX1      | -0.6871567 |
| NFYB      | -0.5435987 |
| NFYC      | -0.7718811 |
| NGEF      | -4.4160776 |
| NGF       | -1.5952692 |
| NGFR      | -3.6368272 |
| NGLY1     | -0.5366511 |
| NGRN      | -0.7178659 |
| NHEJ1     | -1.397852  |
| NHLRC1    | -1.8209596 |
| NHLRC3    | -0.3450401 |
| NHSL1     | -0.4685385 |
| NICN1     | -3.318366  |
| NID2      | -1.4584291 |
| NIF3L1    | -1.0326309 |
| NIFK      | -0.6063762 |
| NIM1K     | -1.0168517 |
| NINJ1     | -1.1760831 |
| NIPA2     | -0.5295057 |
| NIPAL1    | -3.3492625 |
| NIPSNAP1  | -5.8998194 |
| NIPSNAP3B | -2.0754642 |
| NISCH     | -0.5810576 |

|           |            |
|-----------|------------|
| NIT1      | -2.8669305 |
| NIT2      | -5.1839433 |
| NKAIN3    | -1.5266423 |
| NKAIN4    | -0.617105  |
| NKAP      | -0.1535549 |
| NKD2      | -2.8833246 |
| NKIRAS1   | -1.8697429 |
| NKIRAS2   | -0.9867401 |
| NKX1-1    | -0.5663846 |
| NKX1-2    | -2.0079896 |
| NKX2-2    | -1.4990151 |
| NKX2-3    | -1.1250618 |
| NKX2-9    | -1.0868635 |
| NKX6-2    | -3.3577926 |
| NKX6-3    | -2.2485032 |
| NLE1      | -0.8032484 |
| NLN       | -1.0691047 |
| NLRP14    | -2.2597737 |
| NLRP1A    | -0.4440045 |
| NLRP1B    | -0.815963  |
| NLRP1C-PS | -0.5001125 |
| NLRP2     | -1.6560295 |
| NLRP4A    | -1.4587252 |
| NLRP4E    | -1.6738119 |
| NLRP4F    | -1.1123612 |
| NLRP4G    | -1.0900741 |
| NLRP5-PS  | -1.8145039 |
| NLRP6     | -5.5332174 |
| NLRP9C    | -1.2874811 |
| NLRX1     | -1.0263901 |
| NMD3      | -0.624579  |
| NME1      | -1.0599337 |
| NME2      | -1.5497551 |
| NME3      | -0.8267746 |
| NME4      | -1.9116769 |
| NME6      | -2.3145223 |
| NME7      | -0.8809905 |
| NMI       | -0.1916356 |
| NMNAT1    | -2.6785562 |
| NMNAT3    | -1.768856  |
| NMRAL1    | -2.4401755 |
| NMRK1     | -3.6628027 |
| NMT1      | -0.4259129 |
| NNMT      | -1.3815718 |
| NNT       | -3.0656147 |

|          |            |
|----------|------------|
| NOA1     | -0.4782295 |
| NOB1     | -0.2725797 |
| NOBOX    | -1.4864974 |
| NOC2L    | -0.5430389 |
| NODAL    | -1.3960378 |
| NOL4     | -1.363874  |
| NOL6     | -0.4334927 |
| NOL7     | -1.4380343 |
| NOL9     | -0.1901596 |
| NONO     | -0.4881358 |
| NOP10    | -1.0558176 |
| NOP16    | -1.595695  |
| NOS1     | -0.8875155 |
| NOSIP    | -0.5190969 |
| NOTO     | -1.0878253 |
| NOTUM    | -3.07366   |
| NOTUMOS  | -5.6045003 |
| NOVA1    | -0.2666085 |
| NOX1     | -1.4344332 |
| NPAS1    | -1.7848423 |
| NPAS3    | -1.913902  |
| NPAT     | -2.022714  |
| NPB      | -2.0608547 |
| NPBWR1   | -1.2484124 |
| NPC1     | -2.2858791 |
| NPEPL1   | -2.2722082 |
| NPFFR1   | -1.139534  |
| NPLOC4   | -1.1265445 |
| NPM3-PS1 | -1.0345483 |
| NPPC     | -0.9858232 |
| NPRL2    | -1.7503409 |
| NPRL3    | -1.5332627 |
| NPS      | -1.8131714 |
| NPSR1    | -0.9004321 |
| NPTX1    | -1.7318859 |
| NPTX2    | -1.2491565 |
| NPVF     | -0.8613215 |
| NPY2R    | -1.5817561 |
| NQO1     | -2.9234982 |
| NQO2     | -4.334077  |
| NR0B1    | -1.3363576 |
| NR0B2    | -7.4700985 |
| NR1D1    | -1.6397069 |
| NR1D2    | -0.9960384 |
| NR1H3    | -2.585373  |

|         |            |
|---------|------------|
| NR1H4   | -5.3228493 |
| NR1H5   | -3.313067  |
| NR1I2   | -6.416458  |
| NR1I3   | -7.9913836 |
| NR2C1   | -0.721982  |
| NR2C2AP | -1.0906863 |
| NR2F1   | -0.9112399 |
| NR2F2   | -0.9167695 |
| NR2F6   | -3.304222  |
| NR3C1   | -0.3058066 |
| NR3C2   | -2.0740685 |
| NR5A1   | -1.878556  |
| NR5A2   | -3.6438327 |
| NRBF2   | -1.0673041 |
| NRBP1   | -0.40869   |
| NRBP2   | -0.4356723 |
| NRDE2   | -0.4754019 |
| NREP    | -1.3386683 |
| NRG2    | -0.6862629 |
| NRG3    | -1.7383852 |
| NRIP2   | -1.7763977 |
| NRK     | -1.607373  |
| NRL     | -1.2829375 |
| NRM     | -0.5214307 |
| NRN1    | -6.682561  |
| NRN1L   | -0.563025  |
| NRP     | -1.8279276 |
| NRP1    | -0.9444103 |
| NRTN    | -0.2465525 |
| NRXN1   | -2.1905172 |
| NRXN2   | -1.1317861 |
| NSA2    | -0.6868153 |
| NSDHL   | -3.5728707 |
| NSFL1C  | -0.2460246 |
| NSL1    | -1.1584525 |
| NSMAF   | -0.350697  |
| NSMCE4A | -0.4233003 |
| NSMF    | -2.2635913 |
| NSUN2   | -0.2273607 |
| NSUN3   | -1.4310029 |
| NSUN4   | -0.3264008 |
| NSUN5   | -1.0606508 |
| NT5C    | -0.9959931 |
| NT5C1A  | -0.6442542 |
| NT5C1B  | -1.4956284 |

|          |            |
|----------|------------|
| NT5C2    | -0.5087271 |
| NT5DC1   | -0.7559567 |
| NT5DC3   | -0.8817396 |
| NT5E     | -2.5159655 |
| NT5M     | -2.0088081 |
| NTAN1    | -0.6099    |
| NTF3     | -2.0919971 |
| NTHL1    | -2.5920749 |
| NTM      | -2.8311067 |
| NTMT1    | -0.1518865 |
| NTN3     | -3.4964402 |
| NTNG1    | -1.125247  |
| NTPCR    | -1.1595511 |
| NTRK1    | -2.1474926 |
| NUBP1    | -0.728899  |
| NUBP2    | -0.9937706 |
| NUBPL    | -2.5897055 |
| NUCB1    | -1.2909479 |
| NUDC     | -0.3566299 |
| NUDCD1   | -0.4872346 |
| NUDCD2   | -1.5969934 |
| NUDCD3   | -0.1721416 |
| NUDT1    | -3.274354  |
| NUDT12   | -3.4995337 |
| NUDT12OS | -1.0937848 |
| NUDT13   | -1.0057402 |
| NUDT14   | -2.1322236 |
| NUDT15   | -0.3544154 |
| NUDT16   | -1.509737  |
| NUDT16L1 | -1.2673464 |
| NUDT19   | -2.0998454 |
| NUDT2    | -1.860363  |
| NUDT21   | -0.3478127 |
| NUDT22   | -1.8003678 |
| NUDT3    | -0.2289391 |
| NUDT4    | -1.2890911 |
| NUDT5    | -1.0844512 |
| NUDT6    | -2.4975343 |
| NUDT7    | -2.9963436 |
| NUDT8    | -3.2162042 |
| NUDT9    | -1.1116738 |
| NUF2     | -0.7107759 |
| NUFIP1   | -2.1886227 |
| NUGGC    | -1.0066955 |
| NUP133   | -0.3919611 |

|         |            |
|---------|------------|
| NUP155  | -1.7952328 |
| NUP210  | -0.6578379 |
| NUP214  | -0.8242788 |
| NUP35   | -0.1532207 |
| NUP37   | -0.4643145 |
| NUP43   | -0.3976564 |
| NUP50   | -0.4748902 |
| NUP54   | -0.2696023 |
| NUP88   | -0.5356593 |
| NUPL1   | -0.1500492 |
| NUPL2   | -0.823303  |
| NUSAP1  | -0.8225741 |
| NUTF2   | -0.6752052 |
| NWD1    | -0.3816361 |
| NXNL1   | -2.2599516 |
| NXPE2   | -4.765643  |
| NXPE4   | -0.8932598 |
| NXPH1   | -1.530308  |
| NXT1    | -0.2438865 |
| NXT2    | -0.7379289 |
| NYAP1   | -1.0174108 |
| NYAP2   | -1.1175425 |
| NYNRIN  | -1.1099508 |
| OAF     | -4.9229445 |
| OARD1   | -1.2051    |
| OAS1B   | -1.0696726 |
| OAS1E   | -0.8019831 |
| OAS1G   | -1.0862322 |
| OAS1H   | -1.5633144 |
| OAT     | -1.7786374 |
| OAZ1    | -1.370007  |
| OAZ3    | -2.6549501 |
| OBOX3   | -1.8358135 |
| OBOX5   | -1.6658204 |
| OBP2A   | -1.0995922 |
| OCA2    | -1.670434  |
| OCEL1   | -0.507081  |
| OCIAD1  | -1.0478387 |
| OCIAD2  | -3.9509757 |
| OCSTAMP | -1.6512175 |
| ODF1    | -3.1901236 |
| ODF3    | -1.3644722 |
| ODF3B   | -0.8898411 |
| ODF4    | -2.5204737 |
| OFCC1   | -1.1221743 |



|             |            |
|-------------|------------|
| OGDH        | -0.7552252 |
| OGDHL       | -3.5726848 |
| OGFOD1      | -1.713047  |
| OGFOD2      | -1.3652349 |
| OGFOD3      | -1.343843  |
| OGFR        | -0.2047119 |
| OGG1        | -0.8680978 |
| OGT         | -0.2588139 |
| OIP5        | -1.7402129 |
| OIT3        | -5.801208  |
| OLA1        | -0.6703262 |
| OLFM2       | -1.6325514 |
| OLFML1      | -4.090928  |
| OLFML2A     | -1.5412924 |
| OLFML3      | -0.3279097 |
| OLFR10      | -1.5528054 |
| OLFR1006    | -2.4926069 |
| OLFR1012    | -0.8602901 |
| OLFR1015    | -1.50192   |
| OLFR1019    | -1.4183702 |
| OLFR1022    | -1.2374082 |
| OLFR1023    | -1.2793057 |
| OLFR1024    | -4.8848724 |
| OLFR1026    | -0.8426981 |
| OLFR1029    | -0.996562  |
| OLFR1032    | -1.4782219 |
| OLFR1036    | -1.1690636 |
| OLFR1037    | -2.2038577 |
| OLFR1039    | -1.9062214 |
| OLFR1042    | -1.6800058 |
| OLFR1044    | -1.6647482 |
| OLFR1049    | -4.541914  |
| OLFR1051    | -1.6507735 |
| OLFR1052    | -1.001859  |
| OLFR1054    | -2.3431756 |
| OLFR1055    | -1.6979065 |
| OLFR1056    | -1.2454574 |
| OLFR1057    | -2.8650508 |
| OLFR105-PS  | -2.3488407 |
| OLFR1061    | -1.0559034 |
| OLFR1065    | -1.5113552 |
| OLFR107     | -1.6549165 |
| OLFR1077-PS | -2.6126695 |
| OLFR108     | -1.3000867 |
| OLFR1082    | -1.6818132 |

|          |            |
|----------|------------|
| OLFR1089 | -2.0444927 |
| OLFR1090 | -1.0665917 |
| OLFR1093 | -1.6360903 |
| OLFR1097 | -1.4193351 |
| OLFR1099 | -2.3414965 |
| OLFR1101 | -2.069991  |
| OLFR1102 | -3.203248  |
| OLFR1105 | -1.6527102 |
| OLFR111  | -2.234106  |
| OLFR1111 | -1.7140884 |
| OLFR1112 | -1.6944766 |
| OLFR1120 | -1.4342494 |
| OLFR1121 | -1.604667  |
| OLFR1128 | -1.7036748 |
| OLFR1132 | -2.1935048 |
| OLFR1135 | -1.4545882 |
| OLFR1136 | -1.0510767 |
| OLFR1138 | -1.7652111 |
| OLFR114  | -1.1943576 |
| OLFR1140 | -0.811357  |
| OLFR1141 | -1.4747653 |
| OLFR115  | -1.4564736 |
| OLFR1151 | -1.2450771 |
| OLFR1153 | -2.975804  |
| OLFR1154 | -1.7395473 |
| OLFR1155 | -1.3036597 |
| OLFR1156 | -1.2839515 |
| OLFR1160 | -1.670013  |
| OLFR1162 | -1.41505   |
| OLFR1166 | -1.595427  |
| OLFR1168 | -0.6683221 |
| OLFR1170 | -0.9947774 |
| OLFR1176 | -1.5940921 |
| OLFR1178 | -1.713449  |
| OLFR1179 | -2.291292  |
| OLFR118  | -3.5353732 |
| OLFR1181 | -2.3077931 |
| OLFR1183 | -1.548454  |
| OLFR1186 | -2.2814708 |
| OLFR1189 | -2.3689766 |
| OLFR119  | -1.6554096 |
| OLFR1195 | -1.6923773 |
| OLFR1196 | -1.651217  |
| OLFR1199 | -2.1636167 |
| OLFR1200 | -1.7580967 |

|          |            |
|----------|------------|
| OLFR1201 | -1.653902  |
| OLFR1202 | -1.6400363 |
| OLFR1204 | -2.02693   |
| OLFR1206 | -2.9350977 |
| OLFR1208 | -1.6456637 |
| OLFR1209 | -1.6358337 |
| OLFR121  | -1.4694145 |
| OLFR1213 | -1.5941405 |
| OLFR122  | -1.0114994 |
| OLFR1220 | -1.956727  |
| OLFR1221 | -1.6028209 |
| OLFR1223 | -1.7364838 |
| OLFR1226 | -1.704715  |
| OLFR1228 | -1.5906973 |
| OLFR1231 | -2.037006  |
| OLFR1238 | -1.332449  |
| OLFR1239 | -1.6209636 |
| OLFR124  | -1.9931571 |
| OLFR1241 | -1.4034209 |
| OLFR1245 | -2.6863477 |
| OLFR1246 | -1.6742933 |
| OLFR1247 | -1.0445352 |
| OLFR1248 | -1.4611588 |
| OLFR1249 | -0.9838054 |
| OLFR1250 | -1.2810578 |
| OLFR1254 | -1.6393931 |
| OLFR1255 | -4.8917418 |
| OLFR1257 | -1.119077  |
| OLFR1259 | -1.3568044 |
| OLFR126  | -2.0683322 |
| OLFR1260 | -3.2313142 |
| OLFR1262 | -2.1724346 |
| OLFR1263 | -1.7715983 |
| OLFR1265 | -1.5377173 |
| OLFR1271 | -0.9415543 |
| OLFR1275 | -1.6921828 |
| OLFR1277 | -1.7580135 |
| OLFR1278 | -1.7355514 |
| OLFR1279 | -1.9985836 |
| OLFR128  | -4.198153  |
| OLFR1284 | -1.6507416 |
| OLFR1286 | -1.6020823 |
| OLFR1287 | -2.22551   |
| OLFR1288 | -3.8429954 |
| OLFR129  | -1.3840694 |

|          |            |
|----------|------------|
| OLFR1290 | -1.6719248 |
| OLFR1294 | -2.0732217 |
| OLFR1297 | -1.764123  |
| OLFR1305 | -3.5547144 |
| OLFR1307 | -1.5443282 |
| OLFR1308 | -3.2234364 |
| OLFR131  | -1.872283  |
| OLFR1310 | -1.7465425 |
| OLFR1313 | -1.1940508 |
| OLFR1314 | -0.6897326 |
| OLFR1316 | -1.3195641 |
| OLFR1317 | -4.823657  |
| OLFR132  | -2.1564412 |
| OLFR1320 | -0.9982677 |
| OLFR1323 | -1.3977463 |
| OLFR1328 | -2.0436385 |
| OLFR1329 | -1.5922525 |
| OLFR133  | -0.9825659 |
| OLFR1330 | -2.234448  |
| OLFR1333 | -1.0887837 |
| OLFR1336 | -1.0177698 |
| OLFR1337 | -1.9770205 |
| OLFR134  | -1.75282   |
| OLFR1342 | -1.417834  |
| OLFR1348 | -1.174412  |
| OLFR1349 | -1.2502856 |
| OLFR135  | -1.2879643 |
| OLFR1350 | -1.7268841 |
| OLFR1356 | -1.7955763 |
| OLFR1357 | -1.5916843 |
| OLFR1358 | -0.6741583 |
| OLFR136  | -1.6462069 |
| OLFR1360 | -1.763005  |
| OLFR1361 | -1.0436354 |
| OLFR1362 | -2.4120011 |
| OLFR1366 | -1.7264647 |
| OLFR1370 | -2.254207  |
| OLFR1377 | -1.7521024 |
| OLFR1378 | -0.6502285 |
| OLFR138  | -1.687103  |
| OLFR1382 | -0.9457221 |
| OLFR1386 | -1.754405  |
| OLFR1388 | -1.2891936 |
| OLFR139  | -1.751833  |
| OLFR1390 | -1.7325954 |

|          |            |
|----------|------------|
| OLFR1393 | -1.3217821 |
| OLFR1395 | -1.410842  |
| OLFR140  | -1.7368004 |
| OLFR1414 | -3.577897  |
| OLFR1415 | -1.1818779 |
| OLFR1418 | -1.2541449 |
| OLFR1419 | -1.4453995 |
| OLFR142  | -1.3640885 |
| OLFR1420 | -2.8155787 |
| OLFR1425 | -0.6100249 |
| OLFR1426 | -1.3618298 |
| OLFR1427 | -1.5888672 |
| OLFR143  | -1.4968364 |
| OLFR1436 | -1.152345  |
| OLFR1441 | -1.9781947 |
| OLFR1444 | -1.655314  |
| OLFR1446 | -1.1019282 |
| OLFR1448 | -3.6210012 |
| OLFR1449 | -1.2748013 |
| OLFR1450 | -1.2827139 |
| OLFR1454 | -0.9427517 |
| OLFR1458 | -1.6100066 |
| OLFR1459 | -1.2153244 |
| OLFR146  | -1.55987   |
| OLFR1461 | -1.0194969 |
| OLFR1465 | -2.2062407 |
| OLFR1466 | -1.0247893 |
| OLFR1467 | -2.2791517 |
| OLFR147  | -2.397781  |
| OLFR1475 | -1.723752  |
| OLFR149  | -0.429029  |
| OLFR1496 | -1.588238  |
| OLFR1497 | -2.0478032 |
| OLFR1499 | -1.5874066 |
| OLFR1502 | -1.3906455 |
| OLFR1507 | -2.0809395 |
| OLFR1508 | -1.5497718 |
| OLFR1509 | -2.6061091 |
| OLFR1513 | -2.257583  |
| OLFR153  | -3.1196527 |
| OLFR1537 | -2.9942932 |
| OLFR157  | -2.1681812 |
| OLFR166  | -2.9897735 |
| OLFR17   | -1.8430014 |
| OLFR172  | -1.6001985 |

|             |            |
|-------------|------------|
| OLFR176     | -3.311645  |
| OLFR178     | -2.191394  |
| OLFR186     | -1.58501   |
| OLFR19      | -1.6290538 |
| OLFR190     | -1.245614  |
| OLFR193     | -1.6053383 |
| OLFR194     | -1.9191027 |
| OLFR196     | -1.6990943 |
| OLFR197     | -1.58917   |
| OLFR198     | -3.0654914 |
| OLFR20      | -3.7593074 |
| OLFR202     | -1.6215131 |
| OLFR204     | -1.5971341 |
| OLFR205     | -1.6642992 |
| OLFR207     | -1.1659253 |
| OLFR208     | -1.5135639 |
| OLFR211     | -1.0837338 |
| OLFR220     | -1.2285347 |
| OLFR222     | -1.6193204 |
| OLFR223     | -1.5181992 |
| OLFR229     | -1.7942572 |
| OLFR23      | -0.6772943 |
| OLFR231     | -1.5921156 |
| OLFR237-PS1 | -1.1797392 |
| OLFR24      | -3.0508144 |
| OLFR242     | -2.7386773 |
| OLFR247     | -2.295951  |
| OLFR248     | -3.508527  |
| OLFR25      | -1.816309  |
| OLFR250     | -2.993288  |
| OLFR262     | -1.1692746 |
| OLFR263     | -1.637258  |
| OLFR27      | -1.7547829 |
| OLFR270     | -1.2160003 |
| OLFR272     | -1.2738974 |
| OLFR273     | -1.00594   |
| OLFR275     | -2.97026   |
| OLFR279     | -0.9052491 |
| OLFR282     | -1.8493667 |
| OLFR290     | -2.267713  |
| OLFR291     | -1.458489  |
| OLFR294     | -1.6215696 |
| OLFR295     | -1.2321196 |
| OLFR298     | -1.5902538 |
| OLFR299     | -1.5966008 |

|             |            |
|-------------|------------|
| OLFR3       | -1.7052693 |
| OLFR303     | -1.7188501 |
| OLFR304     | -1.6121321 |
| OLFR307     | -1.5411284 |
| OLFR308     | -1.5016668 |
| OLFR309     | -1.767201  |
| OLFR31      | -1.3596406 |
| OLFR310     | -2.1506922 |
| OLFR311     | -1.6464922 |
| OLFR312     | -1.1496599 |
| OLFR314     | -1.4489093 |
| OLFR317     | -2.3038077 |
| OLFR318     | -1.6835346 |
| OLFR323     | -1.3935657 |
| OLFR325     | -1.6234422 |
| OLFR328     | -1.736109  |
| OLFR330     | -1.996671  |
| OLFR331     | -1.7316749 |
| OLFR332     | -1.6047912 |
| OLFR338     | -1.0380621 |
| OLFR340     | -2.876648  |
| OLFR342     | -1.6163583 |
| OLFR345     | -1.7345228 |
| OLFR346     | -2.0985162 |
| OLFR351     | -2.2208786 |
| OLFR353     | -1.626759  |
| OLFR354     | -1.0550082 |
| OLFR355     | -3.301918  |
| OLFR356     | -1.1485672 |
| OLFR357     | -1.4381559 |
| OLFR360     | -1.3165674 |
| OLFR365     | -1.1877303 |
| OLFR366     | -1.593487  |
| OLFR367-PS  | -3.258974  |
| OLFR371     | -1.885946  |
| OLFR372     | -0.9299507 |
| OLFR373     | -1.0815408 |
| OLFR390     | -1.4789386 |
| OLFR393     | -1.6976674 |
| OLFR397     | -4.160079  |
| OLFR398     | -1.765069  |
| OLFR402     | -1.5970204 |
| OLFR406     | -1.2980845 |
| OLFR412     | -1.6202161 |
| OLFR418-PS1 | -1.8632638 |

|         |            |
|---------|------------|
| OLFR419 | -1.5849936 |
| OLFR424 | -4.3701763 |
| OLFR426 | -1.241734  |
| OLFR434 | -1.0155036 |
| OLFR437 | -1.7446189 |
| OLFR44  | -1.6067667 |
| OLFR441 | -1.7474558 |
| OLFR447 | -2.4400468 |
| OLFR449 | -1.0910549 |
| OLFR45  | -1.7001214 |
| OLFR452 | -1.6042562 |
| OLFR453 | -1.6012971 |
| OLFR455 | -0.8643081 |
| OLFR460 | -1.5794697 |
| OLFR461 | -1.597635  |
| OLFR467 | -2.992213  |
| OLFR47  | -1.0478535 |
| OLFR474 | -0.9040206 |
| OLFR477 | -1.162256  |
| OLFR479 | -1.6937594 |
| OLFR48  | -0.9662612 |
| OLFR480 | -2.95464   |
| OLFR483 | -2.0384338 |
| OLFR487 | -1.6379154 |
| OLFR49  | -1.7391996 |
| OLFR491 | -1.8236742 |
| OLFR492 | -1.606859  |
| OLFR493 | -1.677186  |
| OLFR495 | -0.2087593 |
| OLFR5   | -2.298149  |
| OLFR50  | -1.5452521 |
| OLFR507 | -1.381557  |
| OLFR508 | -2.2040753 |
| OLFR509 | -1.2349956 |
| OLFR517 | -1.2108593 |
| OLFR52  | -1.283968  |
| OLFR520 | -1.1899922 |
| OLFR523 | -1.7219219 |
| OLFR527 | -1.7074332 |
| OLFR53  | -1.3111985 |
| OLFR531 | -2.2073278 |
| OLFR532 | -2.3019116 |
| OLFR536 | -2.0135808 |
| OLFR538 | -3.413057  |
| OLFR539 | -1.1785336 |



|         |            |
|---------|------------|
| OLFR54  | -1.6159899 |
| OLFR541 | -1.4364161 |
| OLFR543 | -1.0735745 |
| OLFR545 | -2.2160702 |
| OLFR547 | -1.1401992 |
| OLFR549 | -2.2227182 |
| OLFR55  | -1.8486824 |
| OLFR550 | -3.0363302 |
| OLFR551 | -1.1734629 |
| OLFR553 | -1.3560429 |
| OLFR554 | -2.3690891 |
| OLFR555 | -2.4867182 |
| OLFR556 | -1.6857812 |
| OLFR557 | -1.6325448 |
| OLFR558 | -1.6505094 |
| OLFR559 | -0.9818342 |
| OLFR560 | -1.3589578 |
| OLFR561 | -1.0228586 |
| OLFR564 | -2.8612878 |
| OLFR566 | -1.4630833 |
| OLFR568 | -2.755107  |
| OLFR569 | -2.8618798 |
| OLFR57  | -1.6540852 |
| OLFR571 | -2.6208496 |
| OLFR572 | -1.2191339 |
| OLFR577 | -1.6840174 |
| OLFR578 | -1.6726391 |
| OLFR586 | -1.7263451 |
| OLFR59  | -1.677674  |
| OLFR592 | -2.108725  |
| OLFR593 | -2.353029  |
| OLFR596 | -1.8875575 |
| OLFR600 | -1.6896925 |
| OLFR605 | -2.3097157 |
| OLFR606 | -1.2247918 |
| OLFR607 | -1.6342797 |
| OLFR611 | -1.456346  |
| OLFR612 | -0.9750457 |
| OLFR616 | -1.8843694 |
| OLFR619 | -1.31709   |
| OLFR62  | -1.6845918 |
| OLFR620 | -1.5974507 |
| OLFR623 | -1.6223319 |
| OLFR624 | -1.6622772 |
| OLFR629 | -0.3693297 |

|         |            |
|---------|------------|
| OLFR63  | -1.1491599 |
| OLFR630 | -2.0071108 |
| OLFR632 | -2.027978  |
| OLFR638 | -3.648527  |
| OLFR64  | -1.2543802 |
| OLFR640 | -2.257419  |
| OLFR643 | -1.5937147 |
| OLFR644 | -2.5912395 |
| OLFR645 | -1.5227036 |
| OLFR646 | -1.5831583 |
| OLFR648 | -1.369344  |
| OLFR649 | -0.7742939 |
| OLFR654 | -3.4440844 |
| OLFR655 | -2.0097835 |
| OLFR656 | -2.2854743 |
| OLFR657 | -5.0400386 |
| OLFR658 | -1.0898652 |
| OLFR659 | -1.4834509 |
| OLFR66  | -1.5427623 |
| OLFR661 | -1.4741993 |
| OLFR665 | -1.291553  |
| OLFR666 | -1.6685269 |
| OLFR667 | -1.8679469 |
| OLFR668 | -1.6885381 |
| OLFR67  | -1.1699901 |
| OLFR670 | -2.8068798 |
| OLFR672 | -1.3670807 |
| OLFR675 | -1.5834134 |
| OLFR676 | -1.3493738 |
| OLFR678 | -2.1555266 |
| OLFR68  | -1.6368968 |
| OLFR681 | -1.2622128 |
| OLFR684 | -1.1491013 |
| OLFR686 | -2.0247867 |
| OLFR687 | -1.6849833 |
| OLFR691 | -1.6284566 |
| OLFR693 | -2.6207237 |
| OLFR699 | -1.4793153 |
| OLFR70  | -2.2511141 |
| OLFR701 | -1.9493866 |
| OLFR702 | -3.0256214 |
| OLFR703 | -2.2455888 |
| OLFR704 | -3.3470404 |
| OLFR705 | -1.9120965 |
| OLFR707 | -2.2598162 |

|         |            |
|---------|------------|
| OLFR71  | -1.1755171 |
| OLFR713 | -0.8806403 |
| OLFR714 | -0.9352672 |
| OLFR715 | -1.4132495 |
| OLFR720 | -2.463616  |
| OLFR73  | -0.8260136 |
| OLFR730 | -1.4008918 |
| OLFR731 | -1.0733252 |
| OLFR733 | -1.7479024 |
| OLFR734 | -2.4532502 |
| OLFR735 | -0.9806986 |
| OLFR740 | -4.430976  |
| OLFR741 | -1.436224  |
| OLFR744 | -1.9231219 |
| OLFR747 | -0.9736359 |
| OLFR750 | -1.8932161 |
| OLFR763 | -2.252062  |
| OLFR766 | -1.3911715 |
| OLFR768 | -1.3425617 |
| OLFR769 | -1.6318831 |
| OLFR770 | -2.3729846 |
| OLFR771 | -1.7763422 |
| OLFR773 | -2.4145494 |
| OLFR776 | -1.3889337 |
| OLFR787 | -1.6598277 |
| OLFR790 | -1.3056037 |
| OLFR792 | -0.9693627 |
| OLFR794 | -1.3797963 |
| OLFR796 | -2.7581491 |
| OLFR798 | -1.4020817 |
| OLFR8   | -1.1841819 |
| OLFR800 | -1.1413884 |
| OLFR802 | -1.3251698 |
| OLFR805 | -1.6291206 |
| OLFR806 | -2.1286848 |
| OLFR808 | -3.344232  |
| OLFR813 | -1.5070727 |
| OLFR815 | -1.2249615 |
| OLFR816 | -1.7354352 |
| OLFR818 | -0.8271551 |
| OLFR819 | -1.5931168 |
| OLFR820 | -1.6835375 |
| OLFR825 | -2.6557002 |
| OLFR827 | -1.8969548 |
| OLFR829 | -1.8466358 |

|             |            |
|-------------|------------|
| OLFR830     | -1.188108  |
| OLFR837     | -1.4944942 |
| OLFR845     | -3.6440134 |
| OLFR846     | -2.4754083 |
| OLFR847     | -1.5182972 |
| OLFR850     | -1.6046376 |
| OLFR851     | -1.3241806 |
| OLFR854     | -1.4102058 |
| OLFR860     | -1.6277254 |
| OLFR866     | -1.6430316 |
| OLFR867     | -1.7308261 |
| OLFR868     | -1.3281841 |
| OLFR869     | -1.6684396 |
| OLFR873     | -3.985961  |
| OLFR874     | -1.2130003 |
| OLFR876     | -2.4995947 |
| OLFR883     | -1.1392274 |
| OLFR884     | -1.3836222 |
| OLFR889     | -2.841182  |
| OLFR899     | -1.7730091 |
| OLFR9       | -2.0034115 |
| OLFR90      | -1.702136  |
| OLFR900     | -1.5981312 |
| OLFR902     | -0.9976244 |
| OLFR904     | -2.1405275 |
| OLFR905     | -1.6924522 |
| OLFR914     | -1.762049  |
| OLFR915     | -1.338481  |
| OLFR916     | -1.7526    |
| OLFR917     | -2.4697676 |
| OLFR918     | -2.1432648 |
| OLFR921     | -0.3260794 |
| OLFR923     | -1.6181846 |
| OLFR93      | -1.6570792 |
| OLFR930     | -2.0090852 |
| OLFR933     | -2.7428029 |
| OLFR934     | -1.4524992 |
| OLFR937     | -1.7425218 |
| OLFR947-PS1 | -1.5004153 |
| OLFR95      | -2.6938312 |
| OLFR952     | -1.7378545 |
| OLFR957     | -2.299638  |
| OLFR958     | -1.6467795 |
| OLFR959     | -1.7001781 |
| OLFR961     | -1.6132169 |

|         |            |
|---------|------------|
| OLFR965 | -1.0038481 |
| OLFR97  | -0.2669625 |
| OLFR971 | -1.1754496 |
| OLFR975 | -1.7826955 |
| OLFR976 | -1.4514542 |
| OLFR979 | -1.0748253 |
| OLFR980 | -2.1550581 |
| OLFR984 | -1.4271562 |
| OLFR987 | -1.5947504 |
| OLFR995 | -1.7332983 |
| OLIG1   | -0.732615  |
| OLIG2   | -0.3370128 |
| OMA1    | -0.8568313 |
| OMT2A   | -1.413373  |
| ONECUT1 | -3.1650484 |
| ONECUT2 | -5.795756  |
| OOSP2   | -1.0816252 |
| OPA1    | -1.3091817 |
| OPA3    | -1.5567112 |
| OPLAH   | -2.5997791 |
| OPN4    | -0.3412976 |
| OPRK1   | -2.3151014 |
| OPRM1   | -0.3615294 |
| OPTN    | -0.9144087 |
| ORAI1   | -0.6221824 |
| ORAI3   | -0.8288798 |
| ORAOV1  | -0.4055748 |
| ORC3    | -0.9289341 |
| ORC5    | -1.505835  |
| ORM1    | -2.1260052 |
| ORM2    | -2.105173  |
| ORM3    | -3.0513577 |
| ORMDL1  | -1.671915  |
| ORMDL2  | -1.3295827 |
| ORMDL3  | -2.2287178 |
| OS9     | -1.0323901 |
| OSBP2   | -1.3655975 |
| OSBPL1A | -3.4608006 |
| OSBPL2  | -0.4765282 |
| OSCAR   | -1.3481963 |
| OSGEP   | -1.4345651 |
| OSGEPL1 | -2.264821  |
| OSGIN1  | -4.17948   |
| OST4    | -1.5512295 |
| OSTC    | -1.0197396 |

|             |            |
|-------------|------------|
| OSTN        | -0.9368546 |
| OTC         | -7.282975  |
| OTOA        | -1.6416292 |
| OTOGL       | -1.6752441 |
| OTP         | -2.2683957 |
| OTUB1       | -1.1046286 |
| OTUB2       | -0.8368187 |
| OTUD3       | -0.2332234 |
| OTUD6B      | -0.7398422 |
| OTULIN      | -1.4278226 |
| OVCA2       | -0.6514731 |
| OXA1L       | -1.133935  |
| OXLD1       | -3.2884498 |
| OXNAD1      | -2.3462315 |
| OXR1        | -0.9246836 |
| OXSM        | -2.3197086 |
| OXT         | -1.4101567 |
| P2RX4       | -0.598958  |
| P2RX6       | -2.1431718 |
| P2RY1       | -1.3640225 |
| P2RY12      | -0.8094497 |
| P2RY13      | -0.5856967 |
| P2RY4       | -1.1893961 |
| P4HB        | -2.6704335 |
| PABPC1L2B-F | -1.9392858 |
| PABPC2      | -1.7387938 |
| PABPC4L     | -1.9064634 |
| PABPC5      | -1.0344687 |
| PABPC6      | -2.7581134 |
| PABPN1L     | -0.9793921 |
| PACRGL      | -0.5969148 |
| PACSIN3     | -2.5723372 |
| PADI2       | -0.3668816 |
| PADI3       | -0.7749314 |
| PADI6       | -0.9528706 |
| PAFAH1B3    | -0.378849  |
| PAFAH2      | -3.3273797 |
| PAGR1A      | -0.9205232 |
| PAH         | -8.738743  |
| PAICS       | -1.8372374 |
| PAIP1       | -0.339603  |
| PAIP2       | -0.4041414 |
| PAK1        | -0.3569276 |
| PAK1IP1     | -0.4865322 |
| PAK4        | -0.8306956 |

|           |            |
|-----------|------------|
| PALB2     | -1.0705149 |
| PALLD     | -1.5867186 |
| PALM      | -0.6076241 |
| PALM3     | -3.0217566 |
| PALMD     | -1.9149795 |
| PAM16     | -0.9514866 |
| PAMR1     | -0.7823052 |
| PAN2      | -0.9017744 |
| PANK1     | -6.9947624 |
| PANK4     | -0.3081927 |
| PANX2     | -1.5952408 |
| PANX3     | -1.7239826 |
| PAOX      | -2.9759588 |
| PAPD4     | -0.4585867 |
| PAPD5     | -1.2275419 |
| PAPD7     | -0.9506092 |
| PAPLN     | -0.3413727 |
| PAPOLA    | -0.2966795 |
| PAPOLB    | -1.3109598 |
| PAPSS1    | -0.4691401 |
| PAPSS2    | -4.86663   |
| PAQR3     | -1.617866  |
| PAQR4     | -0.4993405 |
| PAQR7     | -2.0285578 |
| PAQR9     | -6.6644764 |
| PARD3     | -0.2618055 |
| PARD3BOS1 | -1.6037328 |
| PARD6A    | -1.2975419 |
| PARK2     | -1.0805361 |
| PARK7     | -2.105641  |
| PARN      | -1.2524023 |
| PARP1     | -1.2513528 |
| PARP12    | -0.3851457 |
| PARP16    | -2.9217594 |
| PARP6     | -0.4814897 |
| PARPBP    | -1.3278632 |
| PARS2     | -1.8709686 |
| PARVA     | -0.5631785 |
| PASK      | -0.5461047 |
| PATE2     | -1.6312013 |
| PATE4     | -1.7006934 |
| PATL2     | -1.6557546 |
| PAX2      | -2.994431  |
| PAX4      | -1.067379  |
| PAX6      | -1.4659591 |

|         |            |
|---------|------------|
| PAX8    | -1.6962125 |
| PBDC1   | -0.3957343 |
| PBK     | -2.0137568 |
| PBLD1   | -0.8814006 |
| PBLD2   | -8.488889  |
| PBSN    | -1.3587334 |
| PBX2    | -0.3370976 |
| PCBD1   | -6.205677  |
| PCBD2   | -1.7010255 |
| PCBP1   | -0.4496355 |
| PCBP4   | -2.2459846 |
| PCCA    | -2.50496   |
| PCCB    | -1.6330459 |
| PCDH1   | -1.7019148 |
| PCDH10  | -0.2126114 |
| PCDH11X | -1.1401892 |
| PCDH12  | -2.9769883 |
| PCDH15  | -1.6000292 |
| PCDH20  | -1.1270299 |
| PCDH9   | -1.704361  |
| PCDHA12 | -0.380264  |
| PCDHA9  | -2.4797962 |
| PCDHB12 | -1.5195372 |
| PCDHB13 | -0.8714185 |
| PCDHB2  | -1.6174736 |
| PCDHB5  | -1.7315934 |
| PCED1A  | -1.9064264 |
| PCGF1   | -0.4779129 |
| PCGF6   | -1.418652  |
| PCID2   | -0.9605773 |
| PCK1    | -3.4061217 |
| PCLO    | -0.7403283 |
| PCMT1   | -0.4090691 |
| PCMTD1  | -1.363462  |
| PCMTD2  | -0.5073886 |
| PCNP    | -0.4667301 |
| PCNX    | -0.4262881 |
| PCNXL3  | -0.7992702 |
| PCOLCE  | -0.6316233 |
| PCP2    | -1.5976999 |
| PCP4L1  | -3.2169738 |
| PCSK1N  | -1.2117989 |
| PCSK4   | -3.9111333 |
| PCSK6   | -4.584473  |
| PCSK7   | -1.2517695 |



|         |            |
|---------|------------|
| PCSK9   | -6.417041  |
| PCTP    | -5.9252    |
| PCX     | -3.1862016 |
| PCYOX1  | -2.5698028 |
| PCYT2   | -4.4954357 |
| PDAP1   | -1.0661988 |
| PDCD2   | -1.4152665 |
| PDCD2L  | -0.6307879 |
| PDCD4   | -0.6455531 |
| PDCD5   | -0.3971329 |
| PDCD6   | -1.0689149 |
| PDCD7   | -0.5003052 |
| PDCL    | -0.4695997 |
| PDCL2   | -1.6493356 |
| PDDC1   | -1.7115221 |
| PDE10A  | -0.6216991 |
| PDE1C   | -0.9700136 |
| PDE2A   | -1.7369323 |
| PDE3B   | -2.5078168 |
| PDE4A   | -0.5531373 |
| PDE4DIP | -0.7517667 |
| PDE6A   | -0.9956646 |
| PDE6C   | -2.376446  |
| PDE6G   | -1.0667548 |
| PDE8A   | -1.3003917 |
| PDE9A   | -1.4216471 |
| PDF     | -1.9482379 |
| PDGFC   | -1.8944368 |
| PDHA1   | -0.4200468 |
| PDHA2   | -1.6362667 |
| PDHB    | -1.2518301 |
| PDHX    | -1.1275334 |
| PDIA4   | -0.2973342 |
| PDIA5   | -1.9394107 |
| PDIA6   | -1.2021475 |
| PDIK1L  | -0.5238059 |
| PDILT   | -6.8848395 |
| PDK1    | -2.4246888 |
| PDK2    | -3.1513214 |
| PDLIM4  | -0.5750046 |
| PDP2    | -3.0279682 |
| PDPK1   | -0.4467149 |
| PDS5B   | -0.1939778 |
| PDSS1   | -0.5574069 |
| PDSS2   | -1.7933159 |

|         |            |
|---------|------------|
| PDX1    | -1.502634  |
| PDXDC1  | -1.0624738 |
| PDXK    | -1.8997092 |
| PDXK-PS | -1.8094504 |
| PDXP    | -3.8821309 |
| PDYN    | -1.0943513 |
| PDZD11  | -0.4984613 |
| PDZD7   | -1.133879  |
| PDZD9   | -1.1401145 |
| PDZK1   | -6.2908945 |
| PDZRN3  | -0.3773556 |
| PDZRN4  | -1.2937081 |
| PEA15B  | -1.0817034 |
| PEBP1   | -1.0284829 |
| PECR    | -6.0664573 |
| PEF1    | -0.9907842 |
| PEG10   | -1.4014709 |
| PEG12   | -0.5616491 |
| PELI2   | -1.0490546 |
| PELI3   | -2.2651675 |
| PELO    | -0.5670767 |
| PELP1   | -0.730454  |
| PEMT    | -6.919945  |
| PEO1    | -2.877186  |
| PEPD    | -2.2557015 |
| PER2    | -0.5744972 |
| PER3    | -2.1403193 |
| PERP    | -2.1551328 |
| PET100  | -1.2752798 |
| PET112  | -3.710955  |
| PEX1    | -3.0034242 |
| PEX10   | -1.3599572 |
| PEX11A  | -2.1958737 |
| PEX11B  | -1.4806862 |
| PEX11G  | -3.5563736 |
| PEX12   | -1.8309388 |
| PEX13   | -1.7860875 |
| PEX14   | -2.430528  |
| PEX16   | -3.8022127 |
| PEX19   | -2.9041977 |
| PEX2    | -1.6240206 |
| PEX26   | -3.0397472 |
| PEX3    | -1.8763943 |
| PEX5    | -2.4516134 |
| PEX6    | -2.4216418 |

|          |            |
|----------|------------|
| PEX7     | -2.973826  |
| PFDN1    | -0.6649361 |
| PFDN5    | -0.4619165 |
| PFKFB1   | -5.556431  |
| PFKL     | -1.0259433 |
| PFKM     | -1.4286995 |
| PFN1     | -0.1898561 |
| PFN3     | -2.2815285 |
| PGAM1    | -1.2304258 |
| PGAM5    | -0.4246721 |
| PGAP2    | -0.843142  |
| PGBD1    | -1.296541  |
| PGC      | -1.1416306 |
| PGK1     | -1.5793266 |
| PGLS     | -1.3348742 |
| PGLYRP2  | -5.2232504 |
| PGLYRP4  | -0.8508177 |
| PGM2     | -3.068275  |
| PGM3     | -0.9535861 |
| PGP      | -0.8514643 |
| PGPEP1   | -3.500543  |
| PGPEP1L  | -1.150919  |
| PGRMC1   | -3.552981  |
| PGRMC2   | -0.8954892 |
| PHACTR3  | -1.3234925 |
| PHAX     | -0.6233597 |
| PHB      | -2.4388657 |
| PHB2     | -2.1337023 |
| PHF10    | -0.6632028 |
| PHF11C   | -0.2645447 |
| PHF14    | -0.2533312 |
| PHF21A   | -0.2396941 |
| PHF5A    | -1.1886768 |
| PHF7     | -1.7836432 |
| PHKA2    | -2.0432944 |
| PHKB     | -0.6395464 |
| PHKG2    | -0.4928646 |
| PHLDA2   | -2.9745605 |
| PHLDA3   | -0.3288093 |
| PHLDB3   | -1.8258681 |
| PHLPP1   | -1.4242694 |
| PHOSPHO2 | -1.0824699 |
| PHPT1    | -1.1629753 |
| PHTF2    | -0.2449641 |
| PHYH     | -3.8214774 |

|           |            |
|-----------|------------|
| PHYHD1    | -0.8394342 |
| PHYHIPL   | -1.1325159 |
| PHYKPL    | -1.7582016 |
| PI4K2A    | -1.0850015 |
| PI4KB     | -0.5655088 |
| PIAS2     | -0.4203072 |
| PIAS4     | -1.1245666 |
| PICK1     | -1.1598017 |
| PID1      | -1.9301243 |
| PIDD1     | -1.3475654 |
| PIGC      | -1.1363211 |
| PIGF      | -1.282495  |
| PIGH      | -0.5983138 |
| PIGK      | -1.5754266 |
| PIGL      | -1.5343165 |
| PIGN      | -0.4564276 |
| PIGO      | -1.5685554 |
| PIGP      | -1.3339472 |
| PIGQ      | -0.9813952 |
| PIGR      | -0.8781529 |
| PIGS      | -0.8726807 |
| PIGT      | -1.8408523 |
| PIGU      | -1.2196174 |
| PIGV      | -0.8713522 |
| PIGX      | -1.2026749 |
| PIGYL     | -1.8599467 |
| PIGZ      | -1.9199328 |
| PIH1D1    | -1.842113  |
| PIK3C2G   | -4.297484  |
| PIK3R2    | -1.6439347 |
| PIK3R4    | -0.633914  |
| PIN1      | -0.7308669 |
| PIN1RT1   | -0.710516  |
| PIN4      | -0.2497344 |
| PINK1     | -2.4614983 |
| PIP       | -1.0143585 |
| PIP4K2B   | -0.7595806 |
| PIP5K1BOS | -1.6053698 |
| PIP5KL1   | -1.4349608 |
| PIPOX     | -7.940505  |
| PIR       | -2.1899014 |
| PIRB      | -0.4642096 |
| PIRT      | -1.4057691 |
| PISD      | -0.8190851 |
| PISD-PS1  | -0.4434652 |

|            |            |
|------------|------------|
| PISD-PS2   | -1.826952  |
| PITHD1     | -0.5294223 |
| PITPNB     | -0.7704372 |
| PITPNM2    | -0.2372003 |
| PITPNM2OS1 | -0.8967369 |
| PITRM1     | -0.7768998 |
| PITX2      | -1.0514221 |
| PIWIL1     | -1.6213908 |
| PJA1       | -1.6992784 |
| PKD1L1     | -3.222382  |
| PKD2L1     | -2.4018016 |
| PKD2L2     | -0.3733344 |
| PKDCC      | -2.863834  |
| PKDREJ     | -1.3358045 |
| PKHD1      | -0.6371405 |
| PKHD1L1    | -1.923142  |
| PKLR       | -6.2244253 |
| PKMYT1     | -0.3981271 |
| PKP2       | -1.4642525 |
| PKP3       | -1.0586257 |
| PKP4       | -0.6139131 |
| PLA1A      | -1.8877316 |
| PLA2G10    | -0.9539614 |
| PLA2G12A   | -1.0711508 |
| PLA2G12B   | -5.703437  |
| PLA2G15    | -1.9384122 |
| PLA2G16    | -0.6029997 |
| PLA2G2D    | -0.5778568 |
| PLA2G3     | -0.9464941 |
| PLA2G4B    | -0.7969637 |
| PLA2G4C    | -1.463438  |
| PLA2G6     | -2.8266115 |
| PLA2R1     | -0.3675482 |
| PLAA       | -0.7543511 |
| PLBD1      | -0.8276372 |
| PLBD2      | -1.6101356 |
| PLCB1      | -1.1410115 |
| PLCE1      | -0.6698349 |
| PLCG1      | -0.1961608 |
| PLCL2      | -1.0131269 |
| PLCXD1     | -1.2999294 |
| PLCXD2     | -3.809668  |
| PLCZ1      | -1.5142817 |
| PLD1       | -0.2279611 |
| PLD4       | -2.0843978 |

|           |            |
|-----------|------------|
| PLD6      | -3.8661704 |
| PLEK2     | -1.9469669 |
| PLEKHA5   | -1.1824195 |
| PLEKHA6   | -3.3172889 |
| PLEKHA7   | -0.920131  |
| PLEKHA8   | -1.7399564 |
| PLEKHD10S | -2.3987656 |
| PLEKHF1   | -1.4165378 |
| PLEKHG1   | -2.947503  |
| PLEKHG3   | -0.8364854 |
| PLEKHG6   | -2.6350777 |
| PLEKHH2   | -1.2099731 |
| PLEKHH3   | -1.2865047 |
| PLEKHJ1   | -1.1550319 |
| PLEKHN1   | -1.4948466 |
| PLG       | -4.6598654 |
| PLIN2     | -1.6735353 |
| PLIN3     | -1.2255707 |
| PLIN5     | -3.5209484 |
| PLK1      | -0.8115521 |
| PLK3      | -0.4404006 |
| PLK4      | -0.3971317 |
| PLK5      | -2.0305474 |
| PLLP      | -3.0341687 |
| PLOD1     | -0.7258036 |
| PLP1      | -0.412425  |
| PLS1      | -0.7263191 |
| PLS3      | -0.6854863 |
| PLSCR2    | -2.7721279 |
| PLSCR4    | -0.5868459 |
| PLTP      | -1.5918164 |
| PLXNA3    | -2.4662614 |
| PLXNB1    | -1.6133299 |
| PLXNB2    | -1.3539915 |
| PLXNB3    | -1.0034175 |
| PLXNC1    | -1.6951046 |
| PLXND1    | -0.260541  |
| PM20D1    | -6.2348347 |
| PMCH      | -1.7550673 |
| PMEL      | -1.936343  |
| PMF1      | -0.9967365 |
| PMIS2     | -1.2255449 |
| PMM2      | -1.9000278 |
| PMP2      | -1.3193209 |
| PMPCA     | -1.2362285 |

|          |            |
|----------|------------|
| PMPCB    | -2.1880636 |
| PMS1     | -0.9113636 |
| PMVK     | -0.5808168 |
| PNKD     | -2.7249508 |
| PNKP     | -0.2861276 |
| PNLDC1   | -2.0601537 |
| PNLIP    | -1.1332798 |
| PNLIPRP2 | -3.0237944 |
| PNMA1    | -1.6133687 |
| PNMA3    | -1.1107864 |
| PNMT     | -2.1263049 |
| PNO1     | -0.833478  |
| PNP      | -1.3999944 |
| PNP2     | -0.8900981 |
| PNPLA1   | -4.146516  |
| PNPLA3   | -4.508005  |
| PNPLA5   | -5.8285313 |
| PNPLA6   | -0.9528775 |
| PNPLA7   | -4.3738565 |
| PNPO     | -3.1388364 |
| PNPT1    | -0.6611366 |
| PNRC2    | -0.278182  |
| PODN     | -0.3441091 |
| PODNL1   | -1.4821751 |
| POFUT1   | -1.0664387 |
| POFUT2   | -0.2410359 |
| POGLUT1  | -0.4066567 |
| POGZ     | -0.18472   |
| POLA1    | -0.747541  |
| POLB     | -0.2240963 |
| POLD1    | -0.5378022 |
| POLD2    | -1.1334572 |
| POLD4    | -1.658792  |
| POLDIP2  | -2.3300633 |
| POLE3    | -0.3350363 |
| POLE4    | -1.5205884 |
| POLG     | -1.3313594 |
| POLG2    | -1.7839024 |
| POLI     | -1.1088219 |
| POLL     | -1.5666127 |
| POLN     | -0.6788712 |
| POLQ     | -0.3430448 |
| POLR1A   | -0.4358077 |
| POLR1B   | -1.0227334 |
| POLR1C   | -0.2854924 |

|          |            |
|----------|------------|
| POLR1D   | -0.4830241 |
| POLR2B   | -0.7613721 |
| POLR2C   | -0.3017659 |
| POLR2D   | -0.7484369 |
| POLR2E   | -0.7383289 |
| POLR2F   | -0.8541188 |
| POLR2G   | -0.5715156 |
| POLR2H   | -1.1118569 |
| POLR2I   | -1.2966604 |
| POLR2J   | -0.9179115 |
| POLR2K   | -0.5678763 |
| POLR2L   | -1.5372896 |
| POLR2M   | -0.4276943 |
| POLR3A   | -1.4673171 |
| POLR3B   | -0.6396756 |
| POLR3C   | -0.9187541 |
| POLR3F   | -0.2877407 |
| POLR3G   | -2.0642126 |
| POLR3H   | -1.2333505 |
| POLRMT   | -1.6917171 |
| POM121L2 | -2.028472  |
| POMGNT1  | -0.3141141 |
| POMGNT2  | -1.3389325 |
| POMK     | -2.070836  |
| POMP     | -0.8300991 |
| POMT1    | -3.0813963 |
| POMT2    | -1.7309318 |
| PON1     | -4.819636  |
| PON3     | -0.8896227 |
| POP1     | -0.7752237 |
| POP5     | -2.246726  |
| POP7     | -0.5596929 |
| POR      | -1.0974946 |
| POT1A    | -0.5398126 |
| POU1F1   | -1.6441696 |
| POU3F2   | -1.934191  |
| POU3F3   | -1.3047152 |
| POU3F4   | -2.4411047 |
| POU4F3   | -1.3762355 |
| POU6F1   | -0.3388529 |
| PPA1     | -2.1850123 |
| PPA2     | -2.2591152 |
| PPAP2B   | -1.6115403 |
| PPAP2C   | -1.8298645 |
| PPAPDC1B | -0.6243005 |



|            |            |
|------------|------------|
| PPAPDC3    | -1.3610902 |
| PPARA      | -4.4741683 |
| PPARG      | -1.009553  |
| PPARGC1A   | -0.9260759 |
| PPARGC1B   | -3.3872905 |
| PPAT       | -0.7477441 |
| PPCDC      | -1.0750191 |
| PPCS       | -2.8351264 |
| PPDPF      | -2.4806452 |
| PPEF1      | -1.1254125 |
| PPFIA2     | -1.3378894 |
| PPFIA3     | -0.3678889 |
| PPFIA4     | -1.6088152 |
| PPFIBP2    | -0.9251747 |
| PPIB       | -2.0356593 |
| PPIE       | -1.3480012 |
| PPIF       | -3.3694854 |
| PPIFOS     | -1.5359397 |
| PPIH       | -0.6928451 |
| PPIL1      | -0.8860345 |
| PPIL2      | -1.2582479 |
| PPIL3      | -0.9292135 |
| PPIP5K2    | -1.0949898 |
| PPM1A      | -0.9765501 |
| PPM1B      | -0.885313  |
| PPM1G      | -0.2788262 |
| PPM1K      | -0.9774294 |
| PPM1L      | -1.2495766 |
| PPME1      | -0.607614  |
| PPNR       | -0.5837317 |
| PPOX       | -2.2622962 |
| PPP1CA     | -1.2834272 |
| PPP1CB     | -0.6613231 |
| PPP1R11    | -1.0611329 |
| PPP1R16A   | -1.3665276 |
| PPP1R18OS  | -0.8568099 |
| PPP1R1B    | -2.25731   |
| PPP1R2-PS9 | -1.1478472 |
| PPP1R35    | -1.7205052 |
| PPP1R37    | -2.3680577 |
| PPP1R3B    | -1.9778686 |
| PPP1R3C    | -4.2126327 |
| PPP1R3E    | -1.4057627 |
| PPP1R3FOS  | -1.6665206 |
| PPP1R3G    | -0.8776088 |

|           |            |
|-----------|------------|
| PPP1R7    | -0.468709  |
| PPP2R1A   | -0.4045358 |
| PPP2R2B   | -0.9954667 |
| PPP2R2COS | -1.757653  |
| PPP2R2D   | -0.6014562 |
| PPP2R3A   | -0.3787062 |
| PPP2R3C   | -0.9579063 |
| PPP2R4    | -2.2956195 |
| PPP2R5A   | -1.4081998 |
| PPP2R5D   | -0.9806042 |
| PPP2R5E   | -1.1972859 |
| PPP4C     | -0.5984054 |
| PPP4R4    | -2.3607104 |
| PPP5C     | -1.0507839 |
| PPP6C     | -0.3337545 |
| PPP6R2    | -0.3731055 |
| PPT2      | -2.5389624 |
| PPTC7     | -0.1576986 |
| PPY       | -0.7164116 |
| PQBP1     | -1.229186  |
| PQLC1     | -1.8250227 |
| PQLC2     | -2.7659616 |
| PRADC1    | -1.8931298 |
| PRAME     | -2.2415946 |
| PRAMEL    | -1.174314  |
| PRAMEL4   | -3.0841694 |
| PRAMEL7   | -1.3538713 |
| PRAP1     | -0.6643429 |
| PRB1      | -1.2011752 |
| PRC1      | -0.7649298 |
| PRDM10    | -0.696564  |
| PRDM12    | -1.1889081 |
| PRDM13    | -1.0038495 |
| PRDM14    | -1.2028122 |
| PRDM9     | -1.4412079 |
| PRDX1     | -1.88308   |
| PRDX2     | -1.8528814 |
| PRDX3     | -1.9261827 |
| PRDX4     | -3.0349622 |
| PREB      | -0.8909001 |
| PRELID1   | -1.185926  |
| PRELID2   | -1.4738388 |
| PREP      | -0.4709311 |
| PREPL     | -1.5046215 |
| PRG2      | -3.5154095 |

|           |            |
|-----------|------------|
| PRG3      | -4.1785965 |
| PRG4      | -2.4316335 |
| PRH1      | -2.2136478 |
| PRICKLE4  | -2.6633854 |
| PRIM1     | -0.932651  |
| PRIM2     | -0.3349311 |
| PRIMA1    | -2.3521438 |
| PRKAA2    | -2.9702973 |
| PRKAB1    | -0.2185116 |
| PRKACA    | -0.9616559 |
| PRKACB    | -0.4740286 |
| PRKAG1    | -1.2165976 |
| PRKAG2    | -2.4311519 |
| PRKAG2OS1 | -1.4217134 |
| PRKAR1A   | -0.719954  |
| PRKAR2A   | -1.5306249 |
| PRKCG     | -1.9015539 |
| PRKCSH    | -1.3234987 |
| PRKCZ     | -1.2138624 |
| PRKD3     | -0.3440318 |
| PRKDC     | -0.4093497 |
| PRKRA     | -2.0979605 |
| PRKRIP1   | -0.3091812 |
| PRKRIR    | -1.0882578 |
| PRL2A1    | -1.611074  |
| PRL2B1    | -1.264085  |
| PRL2C5    | -5.807377  |
| PRL3A1    | -1.5405314 |
| PRL3C1    | -1.6389132 |
| PRL3D2    | -0.9041345 |
| PRL4A1    | -2.0457404 |
| PRL5A1    | -1.6815171 |
| PRL6A1    | -1.1551638 |
| PRL7A1    | -1.0071757 |
| PRL7B1    | -1.6414881 |
| PRL7C1    | -3.3708885 |
| PRL7D1    | -1.6187191 |
| PRLR      | -6.1563864 |
| PRM1      | -0.6547458 |
| PRM3      | -1.7199306 |
| PRMT10    | -0.83355   |
| PRMT3     | -0.5768004 |
| PRMT7     | -0.5926619 |
| PRN       | -2.4985456 |
| PROB1     | -0.7999747 |

|         |            |
|---------|------------|
| PROC    | -6.468449  |
| PROCA1  | -1.1488383 |
| PRODH   | -5.1670127 |
| PRODH2  | -7.875861  |
| PROK1   | -3.3133948 |
| PROM2   | -2.5843956 |
| PRORS1  | -0.7910981 |
| PROS1   | -0.7505856 |
| PROSC   | -1.3640051 |
| PROSER1 | -0.7635071 |
| PROSER2 | -2.2774892 |
| PROX1   | -3.8162684 |
| PROZ    | -4.997785  |
| PRP2    | -1.5052905 |
| PRPF19  | -2.157752  |
| PRPF40B | -0.914216  |
| PRPF8   | -0.7855864 |
| PRPMP5  | -1.1962671 |
| PRPS1   | -0.4135757 |
| PRPS1L3 | -1.1391058 |
| PRPS2   | -0.6026094 |
| PRPSAP1 | -1.4507465 |
| PRPSAP2 | -0.684176  |
| PRR12   | -1.2742555 |
| PRR14   | -0.1677985 |
| PRR14L  | -0.293324  |
| PRR16   | -3.6492393 |
| PRR19   | -1.0259914 |
| PRR22   | -0.7238519 |
| PRR23A  | -1.7103598 |
| PRR27   | -2.5061111 |
| PRR33   | -0.9524894 |
| PRR5    | -1.0107193 |
| PRRC1   | -0.1928425 |
| PRRC2A  | -0.9568477 |
| PRRG2   | -1.9600387 |
| PRRT2   | -1.1713707 |
| PRRT3   | -0.8140135 |
| PRRXL1  | -1.0708694 |
| PRSS1   | -1.1390033 |
| PRSS21  | -1.1507726 |
| PRSS28  | -0.8417504 |
| PRSS29  | -1.5036604 |
| PRSS35  | -1.3505747 |
| PRSS36  | -2.3492773 |

|         |            |
|---------|------------|
| PRSS39  | -1.6031585 |
| PRSS40  | -1.5063355 |
| PRSS41  | -1.1842387 |
| PRSS42  | -1.0806272 |
| PRSS44  | -2.1116772 |
| PRSS45  | -1.2526054 |
| PRSS46  | -1.3509679 |
| PRSS47  | -1.5925283 |
| PRSS48  | -0.2612011 |
| PRSS51  | -1.789458  |
| PRSS54  | -1.6065383 |
| PRSS57  | -1.6016192 |
| PRSS58  | -1.5862846 |
| PRTN3   | -2.645086  |
| PRUNE   | -1.2976162 |
| PSAP    | -0.8227596 |
| PSD2    | -1.0343807 |
| PSD3    | -1.519484  |
| PSEN2   | -2.3047547 |
| PSENEEN | -0.7002459 |
| PSG18   | -2.2690463 |
| PSG20   | -2.002236  |
| PSG22   | -1.0588007 |
| PSG23   | -4.0079303 |
| PSG25   | -1.6619787 |
| PSG28   | -1.7670577 |
| PSKH1   | -1.630516  |
| PSMA1   | -0.4574924 |
| PSMA2   | -0.3501406 |
| PSMA3   | -0.6261535 |
| PSMA4   | -0.7301917 |
| PSMA5   | -1.137013  |
| PSMA6   | -0.6612387 |
| PSMA7   | -0.9301271 |
| PSMB1   | -1.4279723 |
| PSMB10  | -0.8233357 |
| PSMB11  | -1.6718986 |
| PSMB3   | -0.9476323 |
| PSMB4   | -1.00277   |
| PSMB5   | -1.0584435 |
| PSMB6   | -1.4228463 |
| PSMB7   | -1.9515634 |
| PSMB8   | -0.6302724 |
| PSMB9   | -1.2438011 |
| PSMC1   | -0.6762548 |

|        |            |
|--------|------------|
| PSMC2  | -0.5614686 |
| PSMC3  | -0.8735957 |
| PSMC4  | -0.9762278 |
| PSMC5  | -0.5607176 |
| PSMC6  | -0.7596898 |
| PSMD1  | -0.4489589 |
| PSMD10 | -0.2052593 |
| PSMD11 | -1.2968764 |
| PSMD12 | -0.4557118 |
| PSMD13 | -1.3088303 |
| PSMD2  | -0.5207925 |
| PSMD3  | -0.7177777 |
| PSMD4  | -0.8581958 |
| PSMD5  | -1.4363918 |
| PSMD6  | -0.9478078 |
| PSMD7  | -0.6681347 |
| PSMD9  | -2.0814586 |
| PSME1  | -1.0735326 |
| PSME2B | -0.5230522 |
| PSME3  | -1.1416025 |
| PSMF1  | -0.9611177 |
| PSMG1  | -1.8610401 |
| PSMG2  | -1.1705694 |
| PSMG3  | -1.4084821 |
| PSMG4  | -1.2012272 |
| PSPH   | -1.1987371 |
| PSRC1  | -1.7715032 |
| PSTK   | -2.598824  |
| PTCD1  | -1.036706  |
| PTCD2  | -2.2721753 |
| PTCD3  | -1.3666134 |
| PTCH1  | -0.9543822 |
| PTCH2  | -0.6745958 |
| PTCHD1 | -1.6230044 |
| PTCHD2 | -1.0614674 |
| PTDSS1 | -1.0458379 |
| PTDSS2 | -0.9560556 |
| PTEN   | -0.827342  |
| PTER   | -5.5487385 |
| PTF1A  | -1.9290426 |
| PTGDR2 | -1.1413717 |
| PTGDS  | -0.5128779 |
| PTGES  | -0.7341504 |
| PTGES2 | -1.176517  |
| PTGES3 | -0.5498333 |

|         |            |
|---------|------------|
| PTGR1   | -0.5863123 |
| PTGR2   | -2.0569282 |
| PTGS1   | -1.4138346 |
| PTH1R   | -3.8002412 |
| PTH2    | -0.9059012 |
| PTK2B   | -0.9847741 |
| PTK6    | -1.7410209 |
| PTMS    | -2.2763205 |
| PTOV1   | -1.2937641 |
| PTP4A1  | -0.3881283 |
| PTP4A2  | -0.3733773 |
| PTP4A3  | -0.9852715 |
| PTPLA   | -1.2289677 |
| PTPLAD1 | -2.5218587 |
| PTPLAD2 | -1.0378363 |
| PTPLB   | -1.880898  |
| PTPMT1  | -1.599999  |
| PTPN20  | -1.8116517 |
| PTPN3   | -1.2721293 |
| PTPN5   | -0.4965968 |
| PTPN9   | -0.9267025 |
| PTPRD   | -3.2097547 |
| PTPRF   | -0.6278076 |
| PTPRJ   | -0.1535173 |
| PTPRQ   | -2.661809  |
| PTPRV   | -1.0503142 |
| PTRH2   | -1.4576192 |
| PTRHD1  | -1.4194069 |
| PTS     | -2.1235662 |
| PTTG1   | -0.2855091 |
| PTTG1IP | -0.6862874 |
| PTX4    | -1.2914495 |
| PUF60   | -0.8230724 |
| PURA    | -0.45927   |
| PURG    | -0.6116519 |
| PUS1    | -1.4887872 |
| PUS10   | -1.7279582 |
| PUSL1   | -0.7800756 |
| PVRL1   | -2.4648323 |
| PVRL2   | -0.7789426 |
| PVRL3   | -0.2339993 |
| PWP2    | -0.5942478 |
| PXMP2   | -5.5167484 |
| PXMP4   | -3.7784748 |
| PXT1    | -0.6614323 |

|             |            |
|-------------|------------|
| PXYLP1      | -2.2192936 |
| PYCRL       | -2.9891744 |
| PYDC3       | -1.0648975 |
| PYGL        | -2.3881197 |
| PYROXD1     | -0.4415009 |
| PYROXD2     | -4.936965  |
| PYURF       | -3.0169108 |
| PZP         | -1.9980564 |
| QARS        | -0.5893722 |
| QDPR        | -4.894441  |
| QPCT        | -2.7011738 |
| QPCTL       | -0.8076105 |
| QPRT        | -5.576355  |
| QRFP        | -0.7110992 |
| QRFPR       | -1.5656672 |
| QRICH2      | -1.2411077 |
| QRSL1       | -0.7529488 |
| QSOX1       | -1.541132  |
| QTRT1       | -0.6167324 |
| R3HCC1      | -0.890316  |
| R3HDM1      | -0.1596708 |
| R3HDM2      | -0.7171154 |
| R3HDML      | -0.8964043 |
| RAB1        | -0.3099566 |
| RAB11A      | -0.2117462 |
| RAB11B      | -0.3439813 |
| RAB11FIP2   | -0.7749243 |
| RAB11FIP3   | -0.3110023 |
| RAB11FIP4   | -1.554785  |
| RAB11FIP4O5 | -1.3748233 |
| RAB13       | -0.2087498 |
| RAB14       | -0.941473  |
| RAB17       | -4.8060966 |
| RAB18       | -0.6183596 |
| RAB1B       | -1.0728412 |
| RAB21       | -0.8470597 |
| RAB22A      | -0.3095655 |
| RAB23       | -0.5013163 |
| RAB24       | -1.2959809 |
| RAB30       | -2.5457919 |
| RAB32       | -0.8731365 |
| RAB39       | -1.9986105 |
| RAB39B      | -1.650058  |
| RAB3B       | -2.9510458 |
| RAB3D       | -0.2514968 |



|          |            |
|----------|------------|
| RAB3IL1  | -1.1342902 |
| RAB3IP   | -0.3813677 |
| RAB40B   | -1.277411  |
| RAB40C   | -1.0100064 |
| RAB42    | -2.6281748 |
| RAB43    | -1.116097  |
| RAB4A    | -3.278551  |
| RAB4B    | -0.2002473 |
| RAB5B    | -0.6393113 |
| RAB5C    | -0.5203228 |
| RAB7L1   | -1.5365977 |
| RAB8A    | -0.7986589 |
| RAB9     | -1.3229685 |
| RABEP1   | -0.7798119 |
| RABGGTA  | -2.0426378 |
| RABGGTB  | -0.4804435 |
| RABL3    | -2.0048797 |
| RABL6    | -0.3806796 |
| RAD1     | -0.3926463 |
| RAD17    | -0.3492017 |
| RAD21L   | -1.8475585 |
| RAD23A   | -0.9914963 |
| RAD23B   | -0.4138002 |
| RAD50    | -0.3798533 |
| RAD51    | -0.7849245 |
| RAD51AP1 | -0.4128594 |
| RAD51AP2 | -1.6119215 |
| RAD51B   | -5.240256  |
| RAD51C   | -1.094943  |
| RAD51D   | -1.6536708 |
| RAD52    | -0.2448988 |
| RAD54B   | -0.9953637 |
| RAD54L2  | -1.4305701 |
| RAD9A    | -0.3897095 |
| RAET1A   | -5.174647  |
| RAET1B   | -2.675582  |
| RAET1E   | -2.8525982 |
| RAF1     | -0.775476  |
| RAG1     | -1.4663696 |
| RAG2     | -1.6651769 |
| RAI2     | -0.4990284 |
| RALGPS1  | -0.9247131 |
| RALGPS2  | -1.926467  |
| RALY     | -0.9363833 |
| RALYL    | -1.3241999 |

|         |            |
|---------|------------|
| RAMP1   | -0.3561852 |
| RANBP1  | -0.3249908 |
| RANBP10 | -1.9533992 |
| RANBP17 | -1.2873392 |
| RANBP3  | -0.2620831 |
| RANBP3L | -2.0977347 |
| RANBP6  | -0.7472353 |
| RANGAP1 | -0.3377709 |
| RAPGEF1 | -0.6644287 |
| RAPGEF4 | -3.0688899 |
| RAPH1   | -1.6652641 |
| RAPSN   | -0.4862504 |
| RARB    | -1.8122284 |
| RARRES1 | -6.6878157 |
| RARRES2 | -2.2034383 |
| RARS2   | -0.8036599 |
| RASA1   | -0.6943893 |
| RASAL1  | -2.675127  |
| RASGRF2 | -1.8921709 |
| RASGRP2 | -2.7746873 |
| RASL2-9 | -0.6001434 |
| RASSF3  | -0.815464  |
| RASSF4  | -1.1772795 |
| RASSF6  | -2.3576016 |
| RASSF7  | -1.0987453 |
| RAVER1  | -2.125557  |
| RBBP5   | -0.7468767 |
| RBBP7   | -0.7614017 |
| RBBP9   | -1.0053496 |
| RBCK1   | -0.9927077 |
| RBFA    | -2.1237178 |
| RBFOX2  | -0.6782675 |
| RBFOX3  | -3.2568328 |
| RBKS    | -2.4431953 |
| RBL2    | -1.3259792 |
| RBM10   | -0.397068  |
| RBM12B1 | -1.4568341 |
| RBM20   | -0.9226015 |
| RBM34   | -0.5941424 |
| RBM4    | -1.5535207 |
| RBM44   | -1.6914587 |
| RBM45   | -0.1511607 |
| RBM46OS | -0.2404537 |
| RBM47   | -0.7444005 |
| RBM4B   | -1.1086798 |

|          |            |
|----------|------------|
| RBM6     | -0.2426519 |
| RBMXL2   | -1.7044117 |
| RBMV     | -3.0744874 |
| RBP1     | -4.4128623 |
| RBP4     | -4.546902  |
| RBPMS2   | -4.578865  |
| RCAN2    | -1.879056  |
| RCBTB1   | -1.644074  |
| RCBTB2   | -1.6526141 |
| RCC1     | -0.4709139 |
| RCCD1    | -0.65411   |
| RCHY1    | -0.2831531 |
| RCL1     | -2.7594452 |
| RCN3     | -0.6583352 |
| RCVRN    | -1.5033946 |
| RDH10    | -1.4770212 |
| RDH11    | -2.7452912 |
| RDH13    | -0.6121156 |
| RDH14    | -1.6291928 |
| RDH16    | -8.445192  |
| RDH18-PS | -3.2888906 |
| RDH19    | -1.1262257 |
| RDH5     | -4.708381  |
| RDH7     | -6.2173257 |
| RDH8     | -0.9420171 |
| RDH9     | -5.558666  |
| RDM1     | -1.2275238 |
| RDX      | -0.9325156 |
| REC114   | -3.3192046 |
| REC8     | -0.5114651 |
| RECQL4   | -1.3109696 |
| RECQL5   | -1.2008283 |
| REDRUM   | -0.7626691 |
| REEP3    | -0.8454499 |
| REEP4    | -0.2091546 |
| REEP6    | -5.0494776 |
| REG2     | -1.3538799 |
| REG3D    | -1.9706988 |
| REG4     | -1.8986535 |
| REL      | -2.524313  |
| RELL2    | -0.8212962 |
| RELN     | -2.7050872 |
| REM1     | -0.3602753 |
| REM2     | -2.1132972 |
| REN1     | -0.2658141 |

|         |            |
|---------|------------|
| REN2    | -0.9322667 |
| REPIN1  | -2.2234225 |
| REPS2   | -2.0253496 |
| RER1    | -1.6044192 |
| RERGL   | -0.9599876 |
| RETSAT  | -4.317603  |
| REV1    | -0.5321295 |
| REX2    | -1.1856153 |
| REXO2   | -0.4869952 |
| REXO4   | -0.3763356 |
| RFC2    | -1.4433966 |
| RFC3    | -0.9873366 |
| RFC4    | -0.2949734 |
| RFC5    | -1.2290206 |
| RFESD   | -1.656404  |
| RFFL    | -0.4138331 |
| RFK     | -0.227159  |
| RFNG    | -0.8088226 |
| RFT1    | -1.1117063 |
| RFWD2   | -0.857162  |
| RFWD3   | -0.5254717 |
| RFX7    | -2.016899  |
| RFXANK  | -1.9012089 |
| RFXAP   | -1.174233  |
| RGAG1   | -1.1301067 |
| RGL1    | -0.5843353 |
| RGL2    | -0.3129582 |
| RGL3    | -2.8861713 |
| RGN     | -8.552164  |
| RGS16   | -2.615409  |
| RGS20   | -1.1492224 |
| RGS5    | -1.9407625 |
| RGS7    | -1.5841465 |
| RGS7BP  | -1.1244483 |
| RGS8    | -1.9169612 |
| RGSL1   | -1.36499   |
| RHBDD2  | -0.3122025 |
| RHBDD3  | -2.3407292 |
| RHBDL2  | -2.0344203 |
| RHBG    | -3.8909192 |
| RHEB    | -0.2157512 |
| RHO     | -1.4277873 |
| RHOBTB1 | -1.5280066 |
| RHOBTB3 | -1.1574059 |
| RHOD    | -3.2303243 |

|         |            |
|---------|------------|
| RHOH    | -1.017098  |
| RHOT1   | -0.6738491 |
| RHOT2   | -1.578321  |
| RHOU    | -1.1826277 |
| RHOX10  | -1.6958287 |
| RHOX11  | -1.7395179 |
| RHOX13  | -1.3966134 |
| RHOX2C  | -1.0942822 |
| RHOX2F  | -2.0856752 |
| RHOX2H  | -1.4422987 |
| RHOX3E  | -2.5676913 |
| RHOX3F  | -0.5195255 |
| RHOX4A  | -1.6522155 |
| RHOX4G  | -2.0089254 |
| RHOX5   | -3.2271264 |
| RHOX8   | -0.5713177 |
| RHOX9   | -1.0373147 |
| RHPN2   | -1.558116  |
| RIC3    | -0.3532405 |
| RIC8B   | -0.3128071 |
| RILP    | -3.4630237 |
| RIMKLB  | -1.7196906 |
| RIMS2   | -0.4232681 |
| RIMS3   | -1.7679305 |
| RIMS4   | -4.512641  |
| RING1   | -1.5623713 |
| RINT1   | -0.3101113 |
| RIOK2   | -0.5388117 |
| RIOK3   | -0.2093306 |
| RIPPLY1 | -1.0373623 |
| RIT2    | -0.8579795 |
| RITA1   | -1.1995146 |
| RMDN1   | -2.7429743 |
| RMDN2   | -1.9316316 |
| RMDN3   | -2.1806016 |
| RMI1    | -1.019979  |
| RMI2    | -1.8171866 |
| RMND1   | -3.2739868 |
| RMND5A  | -0.6961708 |
| RMND5B  | -0.7829881 |
| RN28S1  | -0.9201889 |
| RN45S   | -0.5400105 |
| RNASE12 | -1.0073886 |
| RNASE13 | -1.720356  |
| RNASE4  | -2.9849677 |

|           |            |
|-----------|------------|
| RNASE9    | -0.8723488 |
| RNASEH1   | -0.5481892 |
| RNASEH2A  | -1.7150228 |
| RNASEH2B  | -0.7630701 |
| RNASEH2C  | -1.9340038 |
| RNASEK    | -1.3011003 |
| RNASET2A  | -0.8065305 |
| RND2      | -4.5470285 |
| RNF10     | -1.1832824 |
| RNF103    | -1.8255424 |
| RNF11     | -0.4868774 |
| RNF112    | -1.3199203 |
| RNF113A1  | -0.3682351 |
| RNF115    | -0.5743203 |
| RNF121    | -0.7450628 |
| RNF123    | -2.9578886 |
| RNF125    | -0.9958577 |
| RNF126    | -0.5091009 |
| RNF128    | -3.3814278 |
| RNF13     | -1.6385455 |
| RNF133    | -1.0385194 |
| RNF135    | -2.061913  |
| RNF138    | -0.1564207 |
| RNF138RT1 | -4.1651363 |
| RNF139    | -1.3352561 |
| RNF14     | -0.6515989 |
| RNF141    | -1.3080568 |
| RNF144B   | -0.7824402 |
| RNF145    | -0.5702591 |
| RNF148    | -2.630008  |
| RNF149    | -0.3127995 |
| RNF151    | -1.7036965 |
| RNF152    | -4.9628744 |
| RNF165    | -1.4802284 |
| RNF167    | -1.3670473 |
| RNF169    | -0.7566876 |
| RNF17     | -1.6378057 |
| RNF170    | -1.8976936 |
| RNF181    | -1.3646798 |
| RNF183    | -1.0882459 |
| RNF185    | -0.9244032 |
| RNF186    | -0.1986146 |
| RNF187    | -0.9978981 |
| RNF212    | -0.9908814 |
| RNF214    | -0.3769922 |

|         |            |
|---------|------------|
| RNF217  | -0.9878078 |
| RNF222  | -2.4272006 |
| RNF24   | -0.5062923 |
| RNF25   | -0.500442  |
| RNF26   | -0.4991841 |
| RNF4    | -1.1614189 |
| RNF43   | -3.180738  |
| RNF5    | -2.144637  |
| RNF7    | -0.3895946 |
| RNF8    | -0.1884084 |
| RNFT1   | -1.4637947 |
| RNH1    | -0.4557505 |
| RNMTL1  | -1.870884  |
| RNPEP   | -0.2756925 |
| RNPEPL1 | -1.0659881 |
| RNU3B1  | -1.5339336 |
| ROBO2   | -0.7488186 |
| ROBO3   | -2.1776464 |
| ROGDI   | -1.778151  |
| ROM1    | -0.3253613 |
| ROMO1   | -1.673409  |
| ROPN1L  | -4.398627  |
| RORA    | -0.4967852 |
| RORC    | -3.1863542 |
| ROS1    | -3.2845626 |
| RP1     | -1.2645752 |
| RP1L1   | -0.8442595 |
| RP9     | -1.093091  |
| RPA1    | -0.8806257 |
| RPA3    | -0.6271982 |
| RPAIN   | -0.5153589 |
| RPAP1   | -1.3705807 |
| RPAP2   | -1.3427396 |
| RPE     | -1.1857309 |
| RPE65   | -1.6345222 |
| RPF1    | -0.359911  |
| RPF2    | -0.3974319 |
| RPH3A   | -0.9949801 |
| RPL10   | -0.9416332 |
| RPL10A  | -0.6968193 |
| RPL10L  | -1.4214442 |
| RPL11   | -0.8448734 |
| RPL12   | -0.737915  |
| RPL13   | -0.3690553 |
| RPL13A  | -0.8850737 |

|            |            |
|------------|------------|
| RPL14      | -0.4508901 |
| RPL15      | -0.4706984 |
| RPL17      | -0.5177355 |
| RPL18A     | -0.6095071 |
| RPL19      | -0.7685952 |
| RPL21      | -0.4699407 |
| RPL22      | -0.3916168 |
| RPL23      | -0.3737602 |
| RPL23A     | -0.6879454 |
| RPL24      | -0.8317184 |
| RPL26      | -0.4067435 |
| RPL27      | -0.6191464 |
| RPL27A     | -0.614686  |
| RPL28      | -1.0715218 |
| RPL31      | -0.585546  |
| RPL31-PS12 | -0.512465  |
| RPL32      | -0.3678317 |
| RPL34      | -0.441278  |
| RPL34-PS1  | -0.5903721 |
| RPL35      | -0.5074263 |
| RPL35A     | -0.6922679 |
| RPL36      | -0.9856272 |
| RPL36A     | -0.5757995 |
| RPL36AL    | -1.1569829 |
| RPL37A     | -0.7581139 |
| RPL38      | -0.8085041 |
| RPL39      | -0.3210626 |
| RPL4       | -0.7167573 |
| RPL41      | -0.8494301 |
| RPL5       | -0.5652103 |
| RPL5-PS2   | -0.3253064 |
| RPL6       | -0.5228529 |
| RPL7       | -0.413815  |
| RPL7A      | -0.7575131 |
| RPL7L1     | -1.2607193 |
| RPL8       | -0.4912744 |
| RPL9       | -0.3895226 |
| RPLP0      | -0.6919851 |
| RPLP1      | -0.9616966 |
| RPLP2      | -0.4431295 |
| RPN1       | -0.9722314 |
| RPN2       | -0.7560325 |
| RPP14      | -0.4370089 |
| RPP21      | -1.4393954 |
| RPP25      | -1.1449347 |



|            |            |
|------------|------------|
| RPP25L     | -1.3790894 |
| RPP38      | -0.2204275 |
| RPP40      | -1.3943796 |
| RPRD1A     | -0.2042704 |
| RPRD1B     | -0.1703095 |
| RPS10      | -0.8075647 |
| RPS11      | -0.666245  |
| RPS11-PS1  | -0.6957736 |
| RPS12      | -0.7420025 |
| RPS12L2    | -0.2929349 |
| RPS12-PS16 | -0.4999361 |
| RPS13      | -0.4745078 |
| RPS14      | -0.7290783 |
| RPS15      | -0.8889132 |
| RPS15A     | -0.3566775 |
| RPS16      | -0.824028  |
| RPS17      | -0.7688174 |
| RPS18      | -0.571126  |
| RPS19BP1   | -1.338233  |
| RPS2       | -1.2374907 |
| RPS20      | -0.4300346 |
| RPS21      | -1.0020404 |
| RPS24      | -0.4393892 |
| RPS25      | -0.647881  |
| RPS26      | -0.205008  |
| RPS27      | -0.6097002 |
| RPS27A     | -0.4014325 |
| RPS27L     | -2.552987  |
| RPS28      | -0.5934506 |
| RPS29      | -0.7035408 |
| RPS3       | -0.7845721 |
| RPS3A1     | -0.2196007 |
| RPS4X      | -0.5135403 |
| RPS5       | -0.6917028 |
| RPS6       | -0.2569637 |
| RPS6KB2    | -0.7146864 |
| RPS6KC1    | -0.3957553 |
| RPS8       | -0.9038353 |
| RPSA       | -0.8602009 |
| RPTOR      | -0.81108   |
| RPUSD1     | -0.6453612 |
| RPUSD2     | -1.6567836 |
| RPUSD3     | -3.2269197 |
| RPUSD4     | -0.8871093 |
| RRAGA      | -1.3913164 |

|          |            |
|----------|------------|
| RRAGC    | -0.3304253 |
| RRAS     | -0.5016165 |
| RRBP1    | -0.6507545 |
| RREB1    | -1.1255574 |
| RRM1     | -0.3801913 |
| RRM2     | -0.5887938 |
| RRM2B    | -0.3804135 |
| RRNAD1   | -0.6392648 |
| RRP15    | -0.5243473 |
| RRP36    | -1.099299  |
| RRP8     | -0.4611416 |
| RRS1     | -0.237679  |
| RSG1     | -1.719032  |
| RSL1D1   | -0.5918732 |
| RSLCAN18 | -2.4251192 |
| RSPH3B   | -0.4872594 |
| RSPH6A   | -1.3040395 |
| RSPO3    | -3.9051979 |
| RSPRY1   | -0.1771636 |
| RSRC1    | -0.6025167 |
| RSRP1    | -1.0411873 |
| RTEL1    | -1.1425138 |
| RTFDC1   | -1.2974806 |
| RTKN     | -1.1152754 |
| RTN3     | -0.7710724 |
| RTN4     | -0.7849784 |
| RTN4IP1  | -2.105468  |
| RTN4RL1  | -3.8255188 |
| RTN4RL2  | -0.7048378 |
| RTP2     | -1.3062649 |
| RTP3     | -2.8486695 |
| RUFY1    | -0.7483325 |
| RUFY3    | -1.0758195 |
| RUNDC3A  | -1.5790551 |
| RUNX2    | -0.6085608 |
| RUSC2    | -0.8158703 |
| RUVBL1   | -0.3975043 |
| RWDD2A   | -1.120141  |
| RWDD2B   | -2.2769308 |
| RWDD3    | -1.8481953 |
| RWDD4A   | -0.2615297 |
| RXFP2    | -1.0580959 |
| RXFP3    | -1.0429945 |
| RXRA     | -2.8736892 |
| RXRG     | -2.2448654 |

|         |            |
|---------|------------|
| RYK     | -0.9987087 |
| S100A1  | -1.373467  |
| S100A10 | -1.4699926 |
| S100A7A | -2.4712217 |
| S100Z   | -1.343116  |
| S1PR5   | -4.3510437 |
| SAA1    | -0.4181023 |
| SAA4    | -3.817659  |
| SAAL1   | -1.4197717 |
| SAC3D1  | -1.308382  |
| SACM1L  | -1.2260838 |
| SAE1    | -0.3209381 |
| SAG     | -1.2424805 |
| SALL1   | -5.793779  |
| SALL4   | -0.9645286 |
| SAMD1   | -0.467659  |
| SAMD7   | -1.4544032 |
| SAMM50  | -2.167316  |
| SAMT2   | -1.3162844 |
| SAMT3   | -2.4929867 |
| SAP18   | -0.4752317 |
| SAP30BP | -0.2768889 |
| SAP30L  | -0.9878683 |
| SAR1A   | -0.3753748 |
| SAR1B   | -3.152516  |
| SARDH   | -6.9460206 |
| SARM1   | -1.2865345 |
| SARS2   | -2.0511417 |
| SART1   | -0.2566576 |
| SAT2    | -4.5657353 |
| SAYSD1  | -2.7032099 |
| SBF1    | -0.4639192 |
| SBK1    | -2.94182   |
| SBK2    | -1.4458828 |
| SBP     | -2.872519  |
| SBPL    | -2.8407145 |
| SC5D    | -5.039586  |
| SCAF1   | -2.7842379 |
| SCAMP1  | -0.5134425 |
| SCAMP3  | -1.065762  |
| SCAMP4  | -0.7370472 |
| SCAMP5  | -2.4854286 |
| SCAND1  | -0.5818048 |
| SCAP    | -2.6268468 |
| SCARA3  | -0.3930972 |

|          |            |
|----------|------------|
| SCARB1   | -3.1903877 |
| SCARB2   | -0.4661446 |
| SCD1     | -3.3328676 |
| SCD3     | -3.2776756 |
| SCFD1    | -0.305131  |
| SCGB1B27 | -1.5437112 |
| SCGB1B7  | -2.8453412 |
| SCGB2B15 | -0.7366073 |
| SCGB2B21 | -1.4772551 |
| SCGB2B26 | -1.1835504 |
| SCGB2B27 | -1.429676  |
| SCGB2B3  | -1.6066561 |
| SCGB2B7  | -0.976366  |
| SCGN     | -1.777451  |
| SCIMP    | -1.0944648 |
| SCLT1    | -0.6689189 |
| SCLY     | -3.158576  |
| SCML2    | -0.5894861 |
| SCN1B    | -3.0719023 |
| SCN2A1   | -1.7097192 |
| SCN4B    | -0.9132907 |
| SCN8A    | -1.2001095 |
| SCN9A    | -1.6934013 |
| SCNM1    | -0.6624551 |
| SCO1     | -1.0312266 |
| SCO2     | -4.4714627 |
| SCP2     | -3.8333468 |
| SCP2D1   | -1.6172581 |
| SCPEP1   | -1.3180709 |
| SCRN2    | -4.683589  |
| SCRN3    | -2.8302822 |
| SCRT1    | -0.7626691 |
| SCRT2    | -1.194171  |
| SCYL1    | -0.7663288 |
| SCYL2    | -0.3794804 |
| SCYL3    | -0.6917026 |
| SDC1     | -1.4275465 |
| SDC2     | -4.310366  |
| SDC3     | -1.8876367 |
| SDCCAG3  | -1.0326867 |
| SDF2     | -0.7457547 |
| SDF2L1   | -0.4225526 |
| SDF4     | -1.0087247 |
| SDHA     | -1.5167036 |
| SDHAF1   | -1.2250667 |

|         |            |
|---------|------------|
| SDHAF2  | -0.7533927 |
| SDHB    | -2.3928585 |
| SDHC    | -2.3313756 |
| SDHD    | -2.8755069 |
| SDPR    | -1.3014917 |
| SDR16C5 | -1.5555782 |
| SDR16C6 | -0.6361408 |
| SDR39U1 | -0.9961062 |
| SDR42E1 | -4.587285  |
| SDR9C7  | -4.5348654 |
| SDS     | -4.55709   |
| SDSL    | -0.7579336 |
| SEBOX   | -2.5163412 |
| SEC11A  | -0.4472656 |
| SEC13   | -0.695394  |
| SEC14L2 | -5.3181024 |
| SEC14L4 | -2.2830172 |
| SEC16A  | -1.0581789 |
| SEC16B  | -6.514653  |
| SEC22B  | -0.2347097 |
| SEC22C  | -1.683105  |
| SEC23A  | -2.3932295 |
| SEC24A  | -2.100246  |
| SEC24C  | -0.7728562 |
| SEC24D  | -1.1695294 |
| SEC31A  | -0.8220286 |
| SEC31B  | -1.7221682 |
| SEC61A1 | -0.8884258 |
| SEC61B  | -0.914876  |
| SEC62   | -1.2899427 |
| SEC63   | -0.5090933 |
| SECTM1A | -1.5097136 |
| SEL1L   | -0.3315859 |
| SEL1L2  | -1.2492328 |
| SEL1L3  | -1.7774992 |
| SELK    | -0.2526913 |
| SELO    | -2.2329721 |
| SELT    | -0.964046  |
| SEMA4A  | -1.5578976 |
| SEMA4B  | -0.8107319 |
| SEMA4C  | -1.0618854 |
| SEMA4G  | -9.080381  |
| SEMA5B  | -2.9023328 |
| SEMA6C  | -1.4160879 |
| SEMA6D  | -0.8050923 |

|             |            |
|-------------|------------|
| SENP3       | -0.7658601 |
| SENP5       | -0.3680053 |
| SEPHS1      | -1.0189898 |
| SEPHS2      | -3.5183947 |
| SEPP1       | -2.4028811 |
| SEPSECS     | -2.14534   |
| SEPW1       | -0.2267947 |
| SERF1       | -1.6636171 |
| SERF2       | -1.5851746 |
| SERGEF      | -0.3714347 |
| SERHL       | -2.525076  |
| SERINC1     | -0.8344307 |
| SERINC2     | -1.3650169 |
| SERINC5     | -1.2702069 |
| SERPINA10   | -2.6966052 |
| SERPINA11   | -4.631917  |
| SERPINA1A   | -3.7549443 |
| SERPINA1C   | -3.0987058 |
| SERPINA1D   | -5.5437226 |
| SERPINA1E   | -3.9100475 |
| SERPINA3A   | -2.1777356 |
| SERPINA3C   | -3.0786805 |
| SERPINA3J   | -4.6064944 |
| SERPINA3K   | -3.3748808 |
| SERPINA3M   | -2.8174653 |
| SERPINA4-PS | -2.3482509 |
| SERPINA5    | -1.9850342 |
| SERPINA6    | -8.7004795 |
| SERPINA7    | -5.096842  |
| SERPINB13   | -1.593236  |
| SERPINB1C   | -1.4352298 |
| SERPINB6E   | -0.8899651 |
| SERPINB8    | -0.6782341 |
| SERPINB9B   | -1.0716155 |
| SERPINB9G   | -1.5963631 |
| SERPINC1    | -4.818849  |
| SERPIND1    | -8.455326  |
| SERPINF1    | -5.3437934 |
| SERPINF2    | -4.998319  |
| SERPING1    | -1.7471399 |
| SERPINI2    | -2.5014992 |
| SERTAD4     | -0.1704938 |
| SESN1       | -0.6110435 |
| SESN3       | -0.3629437 |
| SETD1A      | -0.2335901 |

|          |            |
|----------|------------|
| SETD3    | -0.6873779 |
| SETD4    | -3.1894383 |
| SETD6    | -1.9540105 |
| SETD8    | -0.3663354 |
| SETDB1   | -0.5006824 |
| SETMAR   | -1.3772645 |
| SEZ6     | -0.9260337 |
| SEZ6L    | -1.2449706 |
| SF3B2    | -0.6994658 |
| SF3B5    | -0.6724744 |
| SF3B6    | -0.5129576 |
| SFMBT1   | -1.0265694 |
| SFT2D1   | -0.8112936 |
| SFT2D2   | -1.0056038 |
| SFT2D3   | -0.6262422 |
| SFXN1    | -2.678472  |
| SFXN2    | -3.2932415 |
| SFXN5    | -3.3507342 |
| SGCZ     | -1.480381  |
| SGK2     | -9.212726  |
| SGK3     | -0.5766015 |
| SGMS2    | -1.3182969 |
| SGOL1    | -0.3644943 |
| SGOL2    | -0.6071491 |
| SGPL1    | -0.8161283 |
| SGPP1    | -1.7637553 |
| SGSH     | -0.9271741 |
| SGSM1    | -1.3583062 |
| SGSM2    | -2.108809  |
| SGSM3    | -1.297895  |
| SGTA     | -1.0934863 |
| SGTB     | -1.1446528 |
| SH2B1    | -1.7090778 |
| SH2D1B2  | -1.9089422 |
| SH2D4A   | -1.5392582 |
| SH2D6    | -0.4650242 |
| SH2D7    | -1.7897389 |
| SH3BGRL  | -0.9743419 |
| SH3BGRL2 | -0.6255579 |
| SH3BP2   | -0.778091  |
| SH3BP5L  | -0.4740014 |
| SH3D19   | -0.6207504 |
| SH3GLB1  | -0.3534269 |
| SH3GLB2  | -2.118897  |
| SH3RF2   | -2.2695565 |

|          |            |
|----------|------------|
| SH3TC2   | -0.6815972 |
| SH3YL1   | -1.3460512 |
| SHANK2   | -2.1501238 |
| SHARPIN  | -0.5789323 |
| SHB      | -0.3677654 |
| SHBG     | -2.2699785 |
| SHC1     | -0.3858051 |
| SHC3     | -1.5392027 |
| SHCBP1L  | -1.8836586 |
| SHF      | -3.3383145 |
| SHISA2   | -1.4737959 |
| SHISA3   | -0.8418107 |
| SHISA6   | -1.6310253 |
| SHMT1    | -5.3557158 |
| SHMT2    | -3.3074026 |
| SHPK     | -4.612007  |
| SHPRH    | -0.3056274 |
| SHQ1     | -0.4875827 |
| SHROOM1  | -3.1534953 |
| SHROOM2  | -0.5724149 |
| SIAE     | -3.0579634 |
| SIAH2    | -1.6110506 |
| SIDT2    | -1.7382116 |
| SIGIRR   | -2.2466245 |
| SIGLEC1  | -1.2066224 |
| SIGLEC15 | -1.2348948 |
| SIGMAR1  | -4.1318107 |
| SIK3     | -0.4738402 |
| SIL1     | -2.2165694 |
| SIPA1L1  | -0.3347535 |
| SIRPA    | -0.8741765 |
| SIRT2    | -0.9931169 |
| SIRT3    | -4.0557055 |
| SIRT4    | -1.1932185 |
| SIRT5    | -3.3747234 |
| SIRT7    | -0.9472532 |
| SIS      | -1.6396589 |
| SIX5     | -1.5184546 |
| SIX6     | -2.3441896 |
| SKA2     | -1.1029034 |
| SKA3     | -0.7527227 |
| SKI      | -0.4805496 |
| SKINT1   | -2.5536232 |
| SKINT11  | -1.4886944 |
| SKINT2   | -1.3501859 |



|          |            |
|----------|------------|
| SKINT4   | -1.6444962 |
| SKINT6   | -1.3695567 |
| SKINT7   | -1.0321813 |
| SKIV2L   | -0.9787431 |
| SKP1A    | -2.119009  |
| SKP2     | -1.4132705 |
| SLA2     | -0.1965451 |
| SLAIN2   | -0.3181095 |
| SLAMF8   | -0.6352835 |
| SLBP     | -0.6406922 |
| SLC10A1  | -0.495163  |
| SLC10A2  | -1.7119608 |
| SLC10A5  | -3.0328164 |
| SLC12A1  | -1.6431036 |
| SLC12A5  | -2.2373333 |
| SLC12A7  | -2.1770387 |
| SLC12A8  | -0.9551883 |
| SLC12A9  | -1.1853805 |
| SLC13A1  | -1.0754137 |
| SLC13A3  | -3.628553  |
| SLC14A1  | -0.9337285 |
| SLC14A2  | -2.5826137 |
| SLC15A4  | -0.9353237 |
| SLC16A10 | -2.6942744 |
| SLC16A11 | -0.6502671 |
| SLC16A12 | -5.291452  |
| SLC16A2  | -3.801877  |
| SLC16A5  | -5.9606905 |
| SLC17A1  | -4.0921016 |
| SLC17A2  | -3.8645988 |
| SLC17A3  | -5.216242  |
| SLC17A4  | -7.85545   |
| SLC17A5  | -0.6790466 |
| SLC17A6  | -1.6509299 |
| SLC17A8  | -2.996132  |
| SLC17A9  | -1.4616871 |
| SLC18A1  | -2.0277352 |
| SLC18B1  | -0.6571693 |
| SLC19A1  | -1.2767296 |
| SLC19A2  | -4.4613776 |
| SLC1A2   | -5.8534117 |
| SLC1A4   | -0.301261  |
| SLC1A7   | -0.6247635 |
| SLC20A2  | -2.2350435 |
| SLC22A1  | -7.216555  |

|             |            |
|-------------|------------|
| SLC22A13B-P | -1.0837495 |
| SLC22A14    | -1.5935915 |
| SLC22A15    | -0.352159  |
| SLC22A18    | -5.308019  |
| SLC22A2     | -1.609431  |
| SLC22A23    | -2.568418  |
| SLC22A26    | -5.597328  |
| SLC22A27    | -8.281913  |
| SLC22A28    | -4.8265433 |
| SLC22A29    | -6.962203  |
| SLC22A30    | -6.17296   |
| SLC22A4     | -0.9610276 |
| SLC22A5     | -1.0364184 |
| SLC22A7     | -9.838852  |
| SLC23A1     | -4.5700655 |
| SLC24A1     | -1.269695  |
| SLC24A2     | -1.0974061 |
| SLC25A1     | -3.77456   |
| SLC25A10    | -3.3044472 |
| SLC25A11    | -1.4063148 |
| SLC25A12    | -0.5760226 |
| SLC25A13    | -4.944026  |
| SLC25A15    | -2.3043847 |
| SLC25A16    | -1.9964771 |
| SLC25A17    | -1.0447373 |
| SLC25A19    | -0.3525386 |
| SLC25A20    | -1.9440193 |
| SLC25A21    | -5.670532  |
| SLC25A22    | -3.946643  |
| SLC25A23    | -4.6541853 |
| SLC25A25    | -1.7739787 |
| SLC25A26    | -1.5700374 |
| SLC25A27    | -0.3818803 |
| SLC25A28    | -0.2947269 |
| SLC25A3     | -0.3962169 |
| SLC25A30    | -1.0389385 |
| SLC25A31    | -0.7768517 |
| SLC25A32    | -1.0236034 |
| SLC25A33    | -1.4830642 |
| SLC25A34    | -0.8521161 |
| SLC25A37    | -0.5271726 |
| SLC25A38    | -1.5831094 |
| SLC25A39    | -3.187243  |
| SLC25A40    | -0.68854   |
| SLC25A42    | -3.6431794 |

|             |            |
|-------------|------------|
| SLC25A44    | -2.4123323 |
| SLC25A45    | -2.1019316 |
| SLC25A46    | -1.3081574 |
| SLC25A47    | -3.1448736 |
| SLC25A48    | -3.2257864 |
| SLC25A5     | -1.5909476 |
| SLC25A53    | -0.4609048 |
| SLC25A54    | -1.5754569 |
| SLC26A1     | -5.0630746 |
| SLC26A10    | -6.641889  |
| SLC26A11    | -1.2283759 |
| SLC26A5     | -1.652781  |
| SLC26A6     | -1.8549778 |
| SLC26A7     | -1.6144285 |
| SLC26A8     | -1.536227  |
| SLC27A2     | -6.0610776 |
| SLC27A4     | -0.4111204 |
| SLC27A5     | -5.580925  |
| SLC29A1     | -3.8449864 |
| SLC29A2     | -0.7065303 |
| SLC2A2      | -8.05971   |
| SLC2A4RG-PS | -0.9497471 |
| SLC2A5      | -6.0115047 |
| SLC2A7      | -2.2603326 |
| SLC2A8      | -2.4355774 |
| SLC2A9      | -4.537923  |
| SLC30A1     | -1.0010977 |
| SLC30A10    | -4.4348927 |
| SLC30A5     | -0.7827439 |
| SLC30A6     | -1.4567189 |
| SLC30A8     | -2.7180018 |
| SLC30A9     | -1.2187948 |
| SLC31A1     | -2.293604  |
| SLC33A1     | -1.3101015 |
| SLC34A3     | -1.4748874 |
| SLC35A1     | -1.3807883 |
| SLC35A3     | -1.2128534 |
| SLC35A5     | -0.5362573 |
| SLC35B2     | -2.240377  |
| SLC35B3     | -0.4427228 |
| SLC35B4     | -1.2357936 |
| SLC35C1     | -0.5643497 |
| SLC35C2     | -1.9163303 |
| SLC35D1     | -3.1921844 |
| SLC35D2     | -3.5713713 |

|           |            |
|-----------|------------|
| SLC35D3   | -1.0837734 |
| SLC35E1   | -0.1971865 |
| SLC35E2   | -2.982149  |
| SLC35F4   | -1.1774936 |
| SLC35F5   | -1.22124   |
| SLC35F6   | -0.7462754 |
| SLC35G1   | -3.1526809 |
| SLC36A1   | -0.2319877 |
| SLC36A1OS | -2.9257362 |
| SLC36A3   | -1.315079  |
| SLC37A2   | -0.2391515 |
| SLC37A3   | -0.7648034 |
| SLC37A4   | -4.772469  |
| SLC38A10  | -0.6839624 |
| SLC38A11  | -3.557084  |
| SLC38A3   | -6.556947  |
| SLC38A4   | -3.1973958 |
| SLC38A6   | -0.5171809 |
| SLC38A7   | -2.4135222 |
| SLC38A8   | -2.0197756 |
| SLC38A9   | -0.5319872 |
| SLC39A1   | -0.4935308 |
| SLC39A11  | -1.2318497 |
| SLC39A12  | -0.8260026 |
| SLC39A13  | -0.6319618 |
| SLC39A14  | -0.4456835 |
| SLC39A4   | -1.5020638 |
| SLC39A5   | -4.489529  |
| SLC3A1    | -5.626747  |
| SLC40A1   | -6.0607204 |
| SLC41A2   | -0.7702017 |
| SLC41A3   | -1.2450686 |
| SLC43A1   | -2.646374  |
| SLC44A1   | -0.685935  |
| SLC44A3   | -1.6706958 |
| SLC44A5   | -3.0853257 |
| SLC45A1   | -2.5767765 |
| SLC45A2   | -2.0441353 |
| SLC45A3   | -1.206007  |
| SLC46A1   | -5.488703  |
| SLC46A3   | -2.7091537 |
| SLC47A1   | -6.9882197 |
| SLC48A1   | -0.6081719 |
| SLC4A1    | -0.1522608 |
| SLC4A1AP  | -0.3958039 |

|           |            |
|-----------|------------|
| SLC4A4    | -0.9047828 |
| SLC4A7    | -0.2537866 |
| SLC4A9    | -4.560327  |
| SLC50A1   | -0.1766763 |
| SLC51A    | -1.8665192 |
| SLC51B    | -4.7861786 |
| SLC52A2   | -1.0566182 |
| SLC5A11   | -2.7469182 |
| SLC5A12   | -2.1864734 |
| SLC5A5    | -1.6601608 |
| SLC5A6    | -1.9169612 |
| SLC5A7    | -1.0221202 |
| SLC6A1    | -2.6907003 |
| SLC6A12   | -4.3527303 |
| SLC6A13   | -6.57211   |
| SLC6A15   | -1.7339902 |
| SLC6A16   | -1.7305021 |
| SLC6A17   | -3.1260722 |
| SLC6A19   | -1.6292312 |
| SLC6A19OS | -1.3204572 |
| SLC6A20B  | -0.9565954 |
| SLC6A6    | -0.4200716 |
| SLC6A7    | -1.2278509 |
| SLC6A9    | -0.7748075 |
| SLC7A14   | -1.3302557 |
| SLC7A15   | -2.2316103 |
| SLC7A2    | -2.3308496 |
| SLC7A4    | -1.3935072 |
| SLC7A6OS  | -1.0619249 |
| SLC7A7    | -0.7981339 |
| SLC7A8    | -0.3249846 |
| SLC8A2    | -1.1633229 |
| SLC8B1    | -1.9597816 |
| SLC9A3R1  | -2.0829706 |
| SLC9A3R2  | -0.2650628 |
| SLC9A6    | -0.4130197 |
| SLC9A8    | -0.5926747 |
| SLC9A9    | -2.1462402 |
| SLC9B1    | -1.3554862 |
| SLC9B2    | -0.2793841 |
| SLCO1A1   | -7.149026  |
| SLCO1A4   | -10.344258 |
| SLCO1B2   | -6.0776753 |
| SLCO2B1   | -4.1535997 |
| SLCO6B1   | -1.5946429 |



|         |            |
|---------|------------|
| SMIM23  | -1.8947325 |
| SMIM24  | -0.3857613 |
| SMIM4   | -1.4580779 |
| SMIM6   | -1.4900231 |
| SMIM7   | -1.0340333 |
| SMIM8   | -1.7335067 |
| SMIM9   | -1.5024033 |
| SMLR1   | -6.485633  |
| SMNDC1  | -1.6014009 |
| SMO     | -1.487247  |
| SMOC1   | -4.7916985 |
| SMOK2A  | -1.2051139 |
| SMOK2B  | -1.0764251 |
| SMOK3B  | -2.3754947 |
| SMOK4A  | -1.138866  |
| SMPD1   | -0.7607656 |
| SMPD2   | -2.6705232 |
| SMPD3   | -1.1541388 |
| SMPD4   | -0.8590541 |
| SMPD5   | -3.4937122 |
| SMPDL3A | -0.7710257 |
| SMR2    | -1.8163371 |
| SMR3A   | -1.9552722 |
| SMU1    | -0.538156  |
| SMUG1   | -0.5902362 |
| SMURF1  | -0.3683825 |
| SMURF2  | -0.2975116 |
| SMYD1   | -1.519325  |
| SMYD2   | -1.4208403 |
| SMYD4   | -1.1888673 |
| SMYD5   | -1.4881341 |
| SNAI2   | -3.6205301 |
| SNAI3   | -2.5812297 |
| SNAP25  | -0.5563445 |
| SNAP29  | -0.38098   |
| SNAP47  | -3.5220375 |
| SNAP91  | -1.6499391 |
| SNAPC2  | -1.0752583 |
| SNAPC5  | -0.326117  |
| SNCAIP  | -0.7851241 |
| SNCB    | -1.5787086 |
| SNED1   | -0.2243791 |
| SNF8    | -1.3862739 |
| SNHG10  | -0.7407014 |
| SNHG8   | -1.5981312 |

|          |            |
|----------|------------|
| SNIP1    | -0.7731981 |
| SNORA47  | -1.9816473 |
| SNPH     | -1.4068167 |
| SNRNP200 | -0.4699473 |
| SNRNP25  | -1.8719115 |
| SNRNP27  | -0.3943138 |
| SNRNP70  | -0.1518807 |
| SNRPA    | -0.3712039 |
| SNRPC    | -0.1806855 |
| SNRPD2   | -0.9737177 |
| SNRPD3   | -0.2393503 |
| SNRPN    | -2.1189008 |
| SNTB1    | -1.635643  |
| SNTG1    | -1.8630095 |
| SNTG2    | -4.465129  |
| SNUPN    | -0.9196296 |
| SNX14    | -0.9227572 |
| SNX15    | -1.2997861 |
| SNX19    | -1.0272064 |
| SNX2     | -0.5501375 |
| SNX21    | -1.354527  |
| SNX24    | -1.4363561 |
| SNX3     | -0.7419167 |
| SNX32    | -1.5349588 |
| SNX33    | -1.1859832 |
| SNX5     | -0.4112544 |
| SNX7     | -0.6494064 |
| SNX8     | -1.3116493 |
| SOAT2    | -3.4074101 |
| SOD1     | -2.5331712 |
| SOGA3    | -0.2257633 |
| SOHLH2   | -0.3166807 |
| SORBS1   | -0.3569784 |
| SORBS2   | -3.5919766 |
| SORD     | -5.9174542 |
| SOS1     | -0.4663034 |
| SOWAHB   | -2.0293188 |
| SOWAHD   | -2.6267858 |
| SOX1     | -2.5286083 |
| SOX12    | -1.1205492 |
| SOX14    | -2.4609828 |
| SOX15    | -1.2079394 |
| SOX18    | -0.6433301 |
| SOX20T   | -1.3778038 |
| SOX3     | -1.685375  |



|            |            |
|------------|------------|
| SOX5       | -1.8175154 |
| SOX5OS3    | -1.5952823 |
| SOX6       | -2.6347268 |
| SOX6OS     | -3.7014399 |
| SOX9       | -0.477418  |
| SP110      | -0.9540477 |
| SP5        | -2.8774061 |
| SPACA1     | -1.5258679 |
| SPACA5     | -1.620631  |
| SPACA7     | -1.802891  |
| SPAG11A    | -2.6751297 |
| SPAG4      | -4.643856  |
| SPAG5      | -0.3294587 |
| SPAG7      | -1.0396767 |
| SPAG8      | -0.6549974 |
| SPAM1      | -1.5053015 |
| SPAST      | -1.2140107 |
| SPATA20    | -0.9898837 |
| SPATA22    | -4.816758  |
| SPATA24    | -1.405721  |
| SPATA2L    | -3.9038513 |
| SPATA31D1C | -2.118829  |
| SPATA32    | -1.011904  |
| SPATA33    | -0.3044717 |
| SPATA4     | -2.1246161 |
| SPATA45    | -2.6372504 |
| SPATA5L1   | -0.2022936 |
| SPATA9     | -1.0140553 |
| SPATC1L    | -0.4971225 |
| SPATS1     | -2.054089  |
| SPC24      | -2.7965894 |
| SPC25      | -2.6062942 |
| SPCS1      | -0.7671356 |
| SPCS3      | -0.6979785 |
| SPDL1      | -1.0419264 |
| SPDYA      | -1.072288  |
| SPDYB      | -1.4452095 |
| SPEER4F    | -1.4128499 |
| SPESP1     | -1.4912019 |
| SPG11      | -0.2547283 |
| SPG20      | -0.2848198 |
| SPG7       | -1.1435227 |
| SPHK2      | -1.3454242 |
| SPIC       | -1.182909  |
| SPIN2C     | -2.5177822 |

|          |            |
|----------|------------|
| SPINK10  | -1.3541687 |
| SPINK11  | -2.4522245 |
| SPINK13  | -1.77387   |
| SPINK3   | -4.71461   |
| SPINK8   | -1.4070315 |
| SPINT3   | -2.4092524 |
| SPINT4   | -1.4681544 |
| SPIRE2   | -0.7623317 |
| SPNS1    | -0.510046  |
| SPNS2    | -1.4831872 |
| SPNS3    | -2.2808077 |
| SPOCK1   | -1.2774539 |
| SPON2    | -6.4351134 |
| SPP2     | -6.538906  |
| SPPL2B   | -0.9325423 |
| SPR      | -3.2320151 |
| SPRR4    | -1.821255  |
| SPRYD3   | -0.3328652 |
| SPRYD4   | -3.333776  |
| SPSB2    | -1.0329785 |
| SPSB3    | -0.6613059 |
| SPSB4    | -3.441763  |
| SPT1     | -1.6413841 |
| SPTBN2   | -4.3039017 |
| SPTBN5   | -1.5403571 |
| SPTSSA   | -2.0237327 |
| SPZ1     | -1.6694188 |
| SQLE     | -2.9296565 |
| SQRDL    | -3.02079   |
| SQSTM1   | -0.6548162 |
| SRA1     | -0.7939787 |
| SRBD1    | -0.9029322 |
| SRCRB4D  | -1.3364115 |
| SRD5A1   | -6.1957283 |
| SRD5A2   | -1.1912866 |
| SRD5A3   | -0.1743369 |
| SREBF1   | -3.6409116 |
| SREBF2   | -0.3388844 |
| SREK1    | -0.8777785 |
| SREK1IP1 | -1.6011472 |
| SRGAP2   | -0.2412238 |
| SRM      | -0.6750503 |
| SRMS     | -1.8502653 |
| SRP54B   | -0.3230319 |
| SRP72    | -1.4210181 |

|         |            |
|---------|------------|
| SRP9    | -0.4643641 |
| SRPK1   | -0.2048674 |
| SRPR    | -0.9304643 |
| SRPX2   | -1.2011824 |
| SRR     | -3.5917263 |
| SRRD    | -1.4176607 |
| SRRM3   | -1.0598016 |
| SRRM3OS | -2.0599422 |
| SRRM4   | -2.1717176 |
| SRRM4OS | -1.8023467 |
| SRSF12  | -0.7416625 |
| SRSF9   | -0.361608  |
| SRXN1   | -0.5478845 |
| SS18L1  | -0.8607893 |
| SSBP1   | -0.3160539 |
| SSBP3   | -1.532805  |
| SSFA2   | -1.5676026 |
| SSMEM1  | -1.0077405 |
| SSNA1   | -1.2345381 |
| SSPO    | -2.8288884 |
| SSR1    | -0.4078364 |
| SSR2    | -0.978642  |
| SSR3    | -0.5429416 |
| SSR4    | -1.4302049 |
| SSRP1   | -0.1449847 |
| SSSCA1  | -1.4571576 |
| SSTR1   | -1.1631444 |
| SSTR3   | -0.9469924 |
| SSTR5   | -0.9462161 |
| SSTY1   | -2.1223547 |
| SSU2    | -1.2379906 |
| SSU72   | -0.3675256 |
| SSXA1   | -1.2661147 |
| SSXB1   | -1.3529406 |
| SSXB10  | -1.6439202 |
| SSXB6   | -3.6154895 |
| SSXB7   | -1.0558767 |
| SSXB8   | -2.524983  |
| ST13    | -1.3255024 |
| ST18    | -1.6455307 |
| ST3GAL3 | -2.9570003 |
| ST3GAL4 | -1.2482996 |
| ST3GAL5 | -2.9430838 |
| ST5     | -0.5405107 |
| ST6GAL1 | -2.8583016 |

|            |            |
|------------|------------|
| ST6GAL2    | -1.3909388 |
| ST6GALNAC6 | -3.4826307 |
| ST7L       | -1.5475826 |
| ST8SIA2    | -2.8565133 |
| ST8SIA3    | -1.7225876 |
| ST8SIA5    | -0.1343279 |
| STAB1      | -0.7941456 |
| STAB2      | -4.3177156 |
| STAC       | -0.784008  |
| STAC3      | -0.9972043 |
| STAG3      | -1.3802686 |
| STAMBP     | -0.3587942 |
| STAMOS     | -1.689832  |
| STAP2      | -1.4911265 |
| STARD10    | -4.769731  |
| STARD4     | -1.7156329 |
| STARD5     | -3.0867333 |
| STARD7     | -1.9684367 |
| STARD8     | -0.5969148 |
| STAT2      | -0.1992707 |
| STAT5A     | -0.7566133 |
| STAT5B     | -1.0497155 |
| STAT6      | -0.4891453 |
| STAU1      | -1.1145258 |
| STBD1      | -3.2255478 |
| STEAP3     | -2.2886536 |
| STIM1      | -0.6403637 |
| STIM2      | -1.2054207 |
| STIP1      | -0.9516878 |
| STK11      | -0.727942  |
| STK16      | -2.9392138 |
| STK35      | -0.4009135 |
| STK38      | -0.1829658 |
| STK38L     | -0.5036974 |
| STMN1      | -0.7389813 |
| STOM       | -0.6662478 |
| STOML2     | -1.8957381 |
| STOX2      | -0.9042203 |
| STRA13     | -1.9484158 |
| STRADB     | -2.9168978 |
| STRAP      | -1.3291211 |
| STRBP      | -1.1599917 |
| STRC       | -0.4143252 |
| STRM       | -2.7818449 |
| STRN4      | -0.3837628 |

|         |            |
|---------|------------|
| STS     | -2.0002685 |
| STT3A   | -0.3563542 |
| STT3B   | -0.6146412 |
| STUB1   | -1.4159875 |
| STX17   | -0.5362072 |
| STX18   | -0.4757848 |
| STX2    | -1.3567307 |
| STX4A   | -0.4877796 |
| STX5A   | -0.3738785 |
| STX8    | -0.2172322 |
| STXBP2  | -0.6427431 |
| STXBP5L | -1.5534081 |
| STXBP6  | -2.3005407 |
| STYK1   | -0.8077984 |
| SUCLA2  | -1.7132645 |
| SUCLG1  | -3.106412  |
| SUCLG2  | -4.250857  |
| SUCNR1  | -6.2458925 |
| SUDS3   | -2.5399475 |
| SUGCT   | -4.181682  |
| SULT1A1 | -3.6375551 |
| SULT1B1 | -7.9142046 |
| SULT1C2 | -6.43478   |
| SULT1D1 | -4.142336  |
| SULT1E1 | -3.4264932 |
| SULT2A1 | -11.68733  |
| SULT2A2 | -10.144642 |
| SULT2A3 | -8.565436  |
| SULT2A4 | -11.523837 |
| SULT2A6 | -9.906766  |
| SULT2A7 | -3.6536777 |
| SULT3A1 | -6.9189734 |
| SULT4A1 | -2.379742  |
| SULT5A1 | -1.5223656 |
| SUMF1   | -1.0130916 |
| SUMF2   | -1.9750295 |
| SUMO1   | -0.2496166 |
| SUMO3   | -1.6168885 |
| SUN2    | -0.3327169 |
| SUN3    | -2.492214  |
| SUN5    | -0.571666  |
| SUOX    | -3.6935096 |
| SUPT20  | -0.2299473 |
| SUPT3   | -1.8223557 |
| SUPV3L1 | -1.0998168 |

|          |            |
|----------|------------|
| SURF1    | -1.6118655 |
| SURF2    | -1.4215641 |
| SURF4    | -0.7112889 |
| SUSD1    | -1.2304461 |
| SUV39H2  | -0.89114   |
| SUV420H2 | -0.8078132 |
| SV2C     | -0.7849832 |
| SVAL1    | -1.2755044 |
| SVAL2    | -1.6552999 |
| SVIP     | -1.9924855 |
| SVOP     | -3.1527576 |
| SVS2     | -1.6796789 |
| SVS3B    | -1.750433  |
| SVS5     | -1.3275557 |
| SWI5     | -0.6532788 |
| SYAP1    | -1.3762274 |
| SYBU     | -2.4866345 |
| SYCE2    | -0.3772006 |
| SYCE3    | -4.668955  |
| SYCP2    | -1.3541698 |
| SYCP3    | -0.5537019 |
| SYDE2    | -0.6449385 |
| SYMPK    | -1.7106996 |
| SYN1     | -0.5903173 |
| SYN3     | -0.5568373 |
| SYNA     | -2.426396  |
| SYNB     | -0.7187474 |
| SYNDIG1  | -1.0840578 |
| SYNDIG1L | -3.1545758 |
| SYNE3    | -1.55616   |
| SYNE4    | -0.9644432 |
| SYNGR2   | -0.5172367 |
| SYNGR4   | -2.5752478 |
| SYNJ2BP  | -1.4085517 |
| SYNPO2L  | -0.8062105 |
| SYNPR    | -1.3710659 |
| SYP      | -0.4839368 |
| SYPL     | -0.2650032 |
| SYPL2    | -1.8671937 |
| SYS1     | -1.2679386 |
| SYT1     | -4.3975315 |
| SYT10    | -4.4652624 |
| SYT14    | -0.6384358 |
| SYT15    | -0.496695  |
| SYT17    | -1.5328698 |

|        |            |
|--------|------------|
| SYT2   | -1.4709139 |
| SYT3   | -4.5554743 |
| SYT6   | -2.991417  |
| SYT7   | -1.0281541 |
| SYT9   | -2.541484  |
| SYTL1  | -1.3878319 |
| SYTL4  | -1.8236814 |
| SYVN1  | -0.7366333 |
| SZRD1  | -0.8685136 |
| SZT2   | -0.5608535 |
| TAAR4  | -1.2474709 |
| TAAR7A | -1.7116349 |
| TAAR8A | -1.8347554 |
| TAAR9  | -1.7234468 |
| TAB1   | -0.3766713 |
| TACO1  | -3.0631468 |
| TACR2  | -0.4721036 |
| TADA1  | -0.7597146 |
| TADA3  | -0.4646907 |
| TAF10  | -1.0908875 |
| TAF11  | -0.4687448 |
| TAF12  | -0.3996863 |
| TAF13  | -0.262785  |
| TAF15  | -1.4853988 |
| TAF1A  | -0.210449  |
| TAF2   | -0.4828777 |
| TAF6   | -0.814765  |
| TAF6L  | -1.0198662 |
| TAF9   | -0.7686801 |
| TAGLN3 | -1.4663506 |
| TAL2   | -0.693924  |
| TALDO1 | -0.5734601 |
| TAMM41 | -0.34728   |
| TANGO2 | -3.209816  |
| TAOK2  | -0.2867951 |
| TAOK3  | -0.4338713 |
| TAPBP  | -0.2422738 |
| TAPBPL | -0.4093542 |
| TAPT1  | -1.3071685 |
| TARBP2 | -0.4101486 |
| TARS   | -1.405159  |
| TARS2  | -1.5694251 |
| TARSL2 | -2.5457664 |
| TAS1R2 | -1.6003654 |
| TAS1R3 | -3.1341958 |

|            |            |
|------------|------------|
| TAS2R104   | -2.7718177 |
| TAS2R105   | -1.697294  |
| TAS2R106   | -2.6529646 |
| TAS2R109   | -0.7169128 |
| TAS2R113   | -1.0834925 |
| TAS2R114   | -2.72626   |
| TAS2R115   | -1.344341  |
| TAS2R116   | -1.6059535 |
| TAS2R119   | -1.6604698 |
| TAS2R121   | -1.6376812 |
| TAS2R122   | -1.5997365 |
| TAS2R126   | -0.9792333 |
| TAS2R130   | -1.5029459 |
| TAS2R136   | -1.8199167 |
| TAS2R138   | -2.120306  |
| TAS2R140   | -0.941699  |
| TAS2R143   | -1.5386221 |
| TAT        | -3.1415734 |
| TATDN1     | -0.8078783 |
| TATDN2     | -1.585185  |
| TATDN3     | -1.4834771 |
| TAZ        | -0.964869  |
| TBATA      | -1.534172  |
| TBC1D10A   | -0.3050261 |
| TBC1D13    | -1.1993542 |
| TBC1D17    | -1.0644107 |
| TBC1D21    | -1.8050733 |
| TBC1D22BOS | -2.4371793 |
| TBC1D24    | -1.7414281 |
| TBC1D2B    | -0.813704  |
| TBC1D31    | -1.8228433 |
| TBC1D32    | -0.3502896 |
| TBC1D7     | -2.56582   |
| TBC1D8B    | -0.4991903 |
| TBC1D9B    | -1.0211949 |
| TBCA       | -1.1867533 |
| TBCCD1     | -2.4668932 |
| TBCD       | -1.0096364 |
| TBCEL      | -1.0381179 |
| TBL3       | -0.9817734 |
| TBP        | -0.4782114 |
| TBRG4      | -0.8679791 |
| TBX20      | -0.3243334 |
| TBX3OS1    | -1.4855671 |
| TBXA2R     | -2.453041  |



|         |            |
|---------|------------|
| TBXAS1  | -1.1445799 |
| TCAIM   | -0.9811361 |
| TCAM1   | -1.2992644 |
| TCEA1   | -0.9625135 |
| TCEA2   | -0.9834352 |
| TCEA3   | -3.4032712 |
| TCEAL5  | -1.2334328 |
| TCEB1   | -0.2600999 |
| TCEB2   | -0.7456412 |
| TCF19   | -1.1693282 |
| TCF24   | -3.6741288 |
| TCF25   | -0.4980354 |
| TCF3    | -0.5860033 |
| TCF7L1  | -1.1263957 |
| TCFL5   | -1.4508419 |
| TCIRG1  | -1.1960735 |
| TCL1    | -1.1529062 |
| TCL1B1  | -1.4319911 |
| TCL1B3  | -1.4015982 |
| TCL1B4  | -1.1656275 |
| TCL1B5  | -2.1308923 |
| TCN2    | -1.408978  |
| TCP1    | -0.318378  |
| TCRB-J  | -0.4906848 |
| TCRG-V1 | -0.4088574 |
| TCTA    | -1.7816253 |
| TCTE2   | -0.8167877 |
| TCTN1   | -1.0184045 |
| TDGF1   | -0.2643316 |
| TDO2    | -6.272587  |
| TDP1    | -0.3973613 |
| TDP2    | -1.663948  |
| TDPOZ1  | -3.0914564 |
| TDPOZ2  | -1.1306174 |
| TDPOZ4  | -2.645056  |
| TDRD1   | -1.9335742 |
| TDRD5   | -1.1168032 |
| TDRD6   | -1.4781165 |
| TDRD7   | -0.2199678 |
| TDRD9   | -3.236772  |
| TDRKH   | -1.8517578 |
| TDRP    | -3.084102  |
| TEAD2   | -0.2740188 |
| TEC     | -1.7743051 |
| TECPR2  | -0.6129456 |

|         |            |
|---------|------------|
| TECR    | -3.4269428 |
| TECTB   | -1.1709595 |
| TEDDM1  | -1.9339752 |
| TEF     | -1.2313075 |
| TEFM    | -1.6847479 |
| TEKT3   | -1.7882011 |
| TEKT5   | -0.8464007 |
| TELO2   | -1.3207717 |
| TENM1   | -1.6527865 |
| TENM4   | -1.236496  |
| TEP1    | -0.9149704 |
| TERF1   | -0.8401208 |
| TERF2IP | -0.4213219 |
| TESK2   | -2.1633341 |
| TET1    | -3.2148874 |
| TEX101  | -0.792141  |
| TEX12   | -3.2207646 |
| TEX14   | -2.2067127 |
| TEX16   | -3.2422795 |
| TEX18   | -1.7490733 |
| TEX19.1 | -1.6686182 |
| TEX19.2 | -0.4975777 |
| TEX2    | -2.522686  |
| TEX21   | -1.2409568 |
| TEX22   | -6.171015  |
| TEX24   | -1.1086018 |
| TEX261  | -1.1183972 |
| TEX264  | -1.9747868 |
| TEX29   | -1.3772123 |
| TEX36   | -1.0835626 |
| TEX38   | -0.7706475 |
| TEX43   | -2.1736465 |
| TFAM    | -1.8583555 |
| TFAP2B  | -1.5994511 |
| TFAP4   | -2.1754758 |
| TFB1M   | -2.355515  |
| TFB2M   | -1.47821   |
| TFCP2   | -1.1527998 |
| TFDP1   | -0.5777845 |
| TFEB    | -1.2307682 |
| TFEC    | -1.2753098 |
| TFF3    | -3.9703882 |
| TFG     | -0.6227703 |
| TFIP11  | -0.9547954 |
| TFPI2   | -4.1290903 |

|          |            |
|----------|------------|
| TFPT     | -0.8484602 |
| TFR2     | -4.9336843 |
| TFRC     | -0.4773459 |
| TGDS     | -2.0743492 |
| TGFA     | -1.8896153 |
| TGFBRAP1 | -1.185072  |
| TGM3     | -0.4960198 |
| TGM4     | -1.3145041 |
| TGM6     | -1.1028733 |
| TGM7     | -2.3255208 |
| TGS1     | -0.2350974 |
| TGTP1    | -0.9022698 |
| TGTP2    | -1.007843  |
| THA1     | -1.3092494 |
| THADA    | -0.4741187 |
| THAP1    | -0.7445703 |
| THAP11   | -0.8242168 |
| THAP4    | -1.1565466 |
| THAP6    | -1.1766713 |
| THAP7    | -1.0582681 |
| THBS2    | -0.9011281 |
| THEM4    | -2.3330612 |
| THEM6    | -0.9676447 |
| THEM7    | -4.2033587 |
| THEMIS3  | -1.5934954 |
| THNSL1   | -0.6710236 |
| THNSL2   | -4.6683197 |
| THOC3    | -0.9328408 |
| THOC5    | -0.4710279 |
| THOC7    | -1.4334712 |
| THOP1    | -0.7328701 |
| THPO     | -3.934678  |
| THRA     | -0.5718284 |
| THRB     | -2.095254  |
| THRSP    | -7.9050703 |
| THSD1    | -0.4103022 |
| THTPA    | -2.2963066 |
| THUMPD1  | -0.4062109 |
| THUMPD2  | -1.154922  |
| THUMPD3  | -0.5955224 |
| THY1     | -0.1742535 |
| THYN1    | -0.509984  |
| TIAL1    | -0.7223401 |
| TICAM1   | -1.2297955 |
| TICAM2   | -2.0741644 |

|         |            |
|---------|------------|
| TIGD4   | -1.0651517 |
| TIGD5   | -1.9848585 |
| TIMD2   | -6.6601887 |
| TIMD4   | -3.3659754 |
| TIMM10  | -1.5304322 |
| TIMM10B | -0.5638857 |
| TIMM13  | -2.0789323 |
| TIMM17A | -0.2083383 |
| TIMM17B | -2.1962247 |
| TIMM21  | -1.7846227 |
| TIMM22  | -0.9147887 |
| TIMM23  | -1.2942834 |
| TIMM44  | -1.6051216 |
| TIMM50  | -1.9624505 |
| TIMM8A1 | -2.4405327 |
| TIMM8B  | -1.5594912 |
| TIMM9   | -1.4904656 |
| TIMMDC1 | -1.5057149 |
| TINF2   | -0.5775595 |
| TJP3    | -1.5906415 |
| TK1     | -3.9486876 |
| TKT     | -1.1723127 |
| TKTL2   | -1.069068  |
| TLCD1   | -3.2412505 |
| TLCD2   | -4.8506284 |
| TLDC1   | -1.8228574 |
| TLE2    | -0.8442397 |
| TLE6    | -0.8354044 |
| TLK1    | -0.6422715 |
| TLL2    | -1.7058938 |
| TLN2    | -1.7706573 |
| TLR1    | -0.5566731 |
| TLR11   | -1.110642  |
| TLR12   | -4.223994  |
| TLR3    | -1.6771963 |
| TLR5    | -2.9391375 |
| TLR9    | -3.7505994 |
| TLX1    | -2.035793  |
| TLX3    | -1.4462218 |
| TM2D1   | -0.1820426 |
| TM2D2   | -1.6537466 |
| TM2D3   | -1.0985613 |
| TM4SF4  | -3.4941816 |
| TM4SF5  | -1.3662229 |
| TM6SF2  | -5.1449933 |

|          |            |
|----------|------------|
| TM7SF2   | -6.150759  |
| TM7SF3   | -2.8231764 |
| TM9SF1   | -1.0784903 |
| TM9SF2   | -1.1974483 |
| TM9SF4   | -0.7820015 |
| TMA7     | -0.5605164 |
| TMBIM4   | -1.1259522 |
| TMBIM6   | -2.4776673 |
| TMC3     | -1.944027  |
| TMC6     | -0.3704987 |
| TMC8     | -0.4625063 |
| TMCC1    | -0.6470518 |
| TMCO1    | -1.7428284 |
| TMCO2    | -1.661385  |
| TMCO5    | -3.422922  |
| TMCO5B   | -1.2139342 |
| TMCO6    | -0.2259255 |
| TMED1    | -1.6961589 |
| TMED11   | -1.2013464 |
| TMED2    | -0.6730638 |
| TMED4    | -1.5814147 |
| TMED6    | -2.2668512 |
| TMED7    | -1.44837   |
| TMEM101  | -0.7063608 |
| TMEM102  | -1.847918  |
| TMEM104  | -0.4786367 |
| TMEM106A | -1.3248987 |
| TMEM106B | -2.0836892 |
| TMEM106C | -2.8405387 |
| TMEM110  | -0.7975817 |
| TMEM115  | -1.1773686 |
| TMEM120A | -2.4092093 |
| TMEM126A | -2.2670584 |
| TMEM126B | -2.018876  |
| TMEM129  | -1.6537004 |
| TMEM132B | -1.5889192 |
| TMEM132E | -2.7352035 |
| TMEM134  | -1.269517  |
| TMEM135  | -2.790718  |
| TMEM141  | -3.6383262 |
| TMEM143  | -2.59191   |
| TMEM144  | -2.8183968 |
| TMEM145  | -1.6395881 |
| TMEM147  | -2.1488419 |
| TMEM14A  | -2.4976666 |

|          |            |
|----------|------------|
| TMEM14C  | -2.4876914 |
| TMEM150A | -4.750093  |
| TMEM150B | -1.8406267 |
| TMEM156  | -0.1586337 |
| TMEM158  | -0.8183365 |
| TMEM160  | -1.2118258 |
| TMEM161A | -1.0861964 |
| TMEM161B | -0.1968925 |
| TMEM167  | -0.5201988 |
| TMEM168  | -1.3112042 |
| TMEM170  | -0.6298184 |
| TMEM174  | -1.2232339 |
| TMEM175  | -1.1484008 |
| TMEM176A | -0.9575567 |
| TMEM176B | -0.8081946 |
| TMEM177  | -1.4927709 |
| TMEM178B | -0.8795292 |
| TMEM179B | -0.679359  |
| TMEM18   | -1.7686162 |
| TMEM180  | -1.1259975 |
| TMEM183A | -2.4034152 |
| TMEM184A | -0.8081932 |
| TMEM184C | -0.4241471 |
| TMEM185B | -0.403461  |
| TMEM186  | -0.7621617 |
| TMEM19   | -2.9817324 |
| TMEM191C | -1.4926116 |
| TMEM192  | -0.8014875 |
| TMEM194  | -0.4928503 |
| TMEM198B | -0.3433485 |
| TMEM199  | -0.6398556 |
| TMEM201  | -1.925731  |
| TMEM203  | -1.9258194 |
| TMEM205  | -4.79817   |
| TMEM206  | -0.390512  |
| TMEM208  | -1.4226384 |
| TMEM211  | -1.1181142 |
| TMEM214  | -1.0994997 |
| TMEM217  | -0.9069979 |
| TMEM218  | -1.9600728 |
| TMEM219  | -1.4623199 |
| TMEM220  | -2.9365354 |
| TMEM222  | -0.8203206 |
| TMEM223  | -1.7530661 |
| TMEM229A | -3.0607066 |

|           |            |
|-----------|------------|
| TMEM230   | -1.3642492 |
| TMEM234   | -0.7804518 |
| TMEM238   | -1.7477992 |
| TMEM239   | -0.7665372 |
| TMEM241   | -1.20418   |
| TMEM242   | -1.2993131 |
| TMEM248   | -0.4799538 |
| TMEM25    | -5.573579  |
| TMEM253   | -1.0940413 |
| TMEM254A  | -4.156347  |
| TMEM254C  | -3.4714813 |
| TMEM255A  | -0.605248  |
| TMEM256   | -2.254356  |
| TMEM259   | -1.4689116 |
| TMEM26    | -0.4280043 |
| TMEM260   | -1.2420969 |
| TMEM261   | -1.5984111 |
| TMEM263   | -0.4253135 |
| TMEM29    | -1.2929308 |
| TMEM30A   | -0.9788156 |
| TMEM30B   | -2.476223  |
| TMEM33    | -0.9651771 |
| TMEM35    | -1.7263782 |
| TMEM37    | -1.2592306 |
| TMEM38B   | -1.7932692 |
| TMEM39B   | -0.890501  |
| TMEM41A   | -1.9320955 |
| TMEM41B   | -0.4806938 |
| TMEM42    | -0.8451877 |
| TMEM44    | -0.6287603 |
| TMEM45A   | -0.8407774 |
| TMEM5     | -1.191437  |
| TMEM50A   | -1.6201482 |
| TMEM51    | -1.2540426 |
| TMEM51OS1 | -0.9767437 |
| TMEM52B   | -1.632659  |
| TMEM53    | -4.3285775 |
| TMEM55A   | -1.1535668 |
| TMEM55B   | -0.3135262 |
| TMEM56    | -3.933988  |
| TMEM57    | -1.2776995 |
| TMEM59    | -1.5705805 |
| TMEM60    | -0.7778602 |
| TMEM62    | -0.9102631 |
| TMEM63B   | -2.350391  |

|           |            |
|-----------|------------|
| TMEM64    | -1.3881192 |
| TMEM65    | -0.6591039 |
| TMEM66    | -0.509892  |
| TMEM67    | -0.3394141 |
| TMEM69    | -1.1032634 |
| TMEM70    | -1.8720808 |
| TMEM72    | -1.7225125 |
| TMEM74    | -1.4972069 |
| TMEM8     | -1.2486534 |
| TMEM80    | -0.6572032 |
| TMEM81    | -1.0103707 |
| TMEM82    | -3.5361118 |
| TMEM86A   | -2.2777    |
| TMEM86B   | -6.6071043 |
| TMEM88B   | -1.589891  |
| TMEM9     | -1.7843432 |
| TMEM91    | -2.9174604 |
| TMEM97    | -4.227846  |
| TMEM98    | -1.4891372 |
| TMIE      | -4.139929  |
| TMLHE     | -1.9207747 |
| TMOD4     | -0.7860551 |
| TMPO      | -0.3662624 |
| TMPRSS11B | -0.7911847 |
| TMPRSS11E | -1.6457675 |
| TMPRSS11F | -1.6427114 |
| TMPRSS2   | -0.6947966 |
| TMPRSS3   | -0.7640362 |
| TMPRSS6   | -7.983371  |
| TMPRSS7   | -3.0389588 |
| TMPRSS9   | -1.2186031 |
| TMSB15A   | -1.0974131 |
| TMSB15B1  | -1.0315895 |
| TMTC2     | -0.4344783 |
| TMTC4     | -1.7135694 |
| TMUB1     | -0.5456486 |
| TMUB2     | -0.9846149 |
| TMX1      | -0.7242055 |
| TMX2      | -2.524324  |
| TNFAIP8L1 | -4.3634257 |
| TNFAIP8L2 | -0.404201  |
| TNFRSF11B | -1.7752686 |
| TNFRSF19  | -1.8024366 |
| TNFRSF1A  | -0.296236  |
| TNFRSF22  | -1.0994356 |



|          |            |
|----------|------------|
| TNFRSF8  | -1.1758909 |
| TNFRSF9  | -0.7169371 |
| TNFSF12  | -0.4553609 |
| TNFSF18  | -2.2376907 |
| TNK2     | -0.4570489 |
| TNNI1    | -1.1735432 |
| TNNT1    | -0.3722367 |
| TNPO1    | -0.2244802 |
| TNPO2    | -0.4768748 |
| TNPO3    | -0.4226055 |
| TNS3     | -0.4259596 |
| TNXB     | -0.184885  |
| TOB1     | -2.1906657 |
| TOB2     | -1.0026956 |
| TOLLIP   | -0.1890941 |
| TOM1     | -0.5175519 |
| TOM1L1   | -0.9001126 |
| TOMM20   | -0.5226727 |
| TOMM22   | -0.8853765 |
| TOMM34   | -0.3529596 |
| TOMM40   | -1.406013  |
| TOMM40L  | -0.3331823 |
| TOMM5    | -0.9525809 |
| TOMM6    | -1.4236369 |
| TOMM7    | -0.3908258 |
| TOMM70A  | -1.8177114 |
| TOMT     | -0.7516065 |
| TOP1     | -0.242547  |
| TOP1MT   | -2.8469138 |
| TOP3B    | -0.8191509 |
| TOPORS   | -0.4310279 |
| TOR1A    | -1.9251885 |
| TOR1AIP2 | -0.9798284 |
| TOR1B    | -0.4942484 |
| TOR2A    | -1.5932374 |
| TOR4A    | -0.2999735 |
| TOX      | -2.0853581 |
| TPBPB    | -2.288995  |
| TPCN1    | -2.8947835 |
| TPCN2    | -1.2707484 |
| TPD52L1  | -3.2894201 |
| TPD52L2  | -0.4893913 |
| TPH1     | -0.4416952 |
| TPH2     | -1.6890173 |
| TPI1     | -2.467258  |

|             |            |
|-------------|------------|
| TPK1        | -2.209687  |
| TPMT        | -5.591708  |
| TPO         | -1.5830536 |
| TPP1        | -1.8499885 |
| TPPP        | -3.346234  |
| TPRA1       | -0.5894876 |
| TPRKB       | -1.5544777 |
| TPRN        | -0.6076326 |
| TPST1       | -1.6649532 |
| TPT1        | -0.9138012 |
| TPX2        | -0.2944982 |
| TRABD       | -1.6904273 |
| TRADD       | -1.0304122 |
| TRAF4       | -2.370016  |
| TRAFD1      | -0.434947  |
| TRAM1       | -1.8573294 |
| TRAM1L1     | -1.1523302 |
| TRAM2       | -0.1924691 |
| TRANK1      | -0.6517777 |
| TRAP1       | -3.0333395 |
| TRAPPC1     | -1.1237803 |
| TRAPPC11    | -0.2702923 |
| TRAPPC12    | -1.611753  |
| TRAPPC13    | -0.9703012 |
| TRAPPC2L    | -0.9940672 |
| TRAPPC3     | -0.7308273 |
| TRAPPC3L    | -1.62111   |
| TRAPPC4     | -0.1723046 |
| TRAPPC5     | -1.213604  |
| TRAPPC6A    | -1.4611721 |
| TRAV14D-3-L | -1.6768079 |
| TRAV14N-1   | -1.5938208 |
| TRAV3-4     | -2.127504  |
| TRAV7N-5    | -1.6268353 |
| TRAV9N-2    | -1.3800368 |
| TREML4      | -1.2060413 |
| TRF         | -2.6815367 |
| TRHDE       | -2.216874  |
| TRHR2       | -1.1968281 |
| TRIAP1      | -1.2293005 |
| TRIL        | -1.5606911 |
| TRIM14      | -2.8353574 |
| TRIM2       | -2.2485776 |
| TRIM23      | -0.3116574 |
| TRIM24      | -1.8306475 |

|             |            |
|-------------|------------|
| TRIM25      | -0.8184094 |
| TRIM26      | -0.4506359 |
| TRIM28      | -1.1649313 |
| TRIM30E-PS1 | -1.6000621 |
| TRIM31      | -1.3725774 |
| TRIM32      | -0.2091866 |
| TRIM42      | -1.9374564 |
| TRIM43C     | -0.2700651 |
| TRIM45      | -1.0092931 |
| TRIM58      | -0.8368228 |
| TRIM6       | -1.0792851 |
| TRIM60      | -1.6456466 |
| TRIM61      | -1.1452541 |
| TRIM65      | -0.5260334 |
| TRIM67      | -1.1727233 |
| TRIM68      | -0.760977  |
| TRIM7       | -1.2893963 |
| TRIM71      | -1.3514731 |
| TRIM9       | -0.373538  |
| TRIML1      | -1.4790812 |
| TRIML2      | -1.5685856 |
| TRIP13      | -0.4882469 |
| TRIP4       | -0.5063396 |
| TRIP6       | -0.3971472 |
| TRIT1       | -1.5885906 |
| TRMT1       | -0.5043407 |
| TRMT10A     | -1.0434399 |
| TRMT10B     | -0.953393  |
| TRMT10C     | -0.9749198 |
| TRMT11      | -0.824903  |
| TRMT112     | -0.5150175 |
| TRMT12      | -1.5175486 |
| TRMT1L      | -0.7232971 |
| TRMT2B      | -1.9289026 |
| TRMT5       | -1.1678083 |
| TRMT61B     | -0.4223971 |
| TRMU        | -1.4404345 |
| TRNAU1AP    | -0.8819141 |
| TROAP       | -0.9245651 |
| TRP53       | -0.3875842 |
| TRP53INP2   | -1.1804132 |
| TRP53RK     | -0.7270527 |
| TRP53TG5    | -2.0169    |
| TRP63       | -0.9255858 |
| TRPA1       | -3.4446115 |

|         |            |
|---------|------------|
| TRPC3   | -1.3060498 |
| TRPC4AP | -0.7651177 |
| TRPC5OS | -1.5228348 |
| TRPM2   | -0.8528657 |
| TRPM3   | -1.3772895 |
| TRPM4   | -0.6374488 |
| TRPM5   | -0.9964542 |
| TRPM7   | -0.8388019 |
| TRPM8   | -1.1621244 |
| TRPT1   | -1.3296618 |
| TRPV1   | -3.092381  |
| TRRAP   | -1.0992184 |
| TRUB1   | -1.6335297 |
| TRUB2   | -0.5343714 |
| TRY5    | -0.8315997 |
| TSACC   | -0.9175191 |
| TSC1    | -1.0826273 |
| TSEN15  | -0.6843572 |
| TSEN2   | -1.8761191 |
| TSEN34  | -1.3607335 |
| TSEN54  | -1.1788821 |
| TSFM    | -1.3855939 |
| TSG101  | -0.285244  |
| TSGA13  | -1.2042961 |
| TSGA8   | -1.5587332 |
| TSHB    | -1.2694902 |
| TSHR    | -1.5516264 |
| TSHZ2   | -0.5193453 |
| TSKS    | -0.760828  |
| TSKU    | -0.5065846 |
| TSN     | -0.7544723 |
| TSNAX   | -0.2988577 |
| TSPAN12 | -3.719067  |
| TSPAN31 | -2.7191029 |
| TSPAN33 | -1.7968831 |
| TSPAN4  | -1.1494126 |
| TSPAN7  | -0.6259441 |
| TSPEAR  | -1.7370131 |
| TSPYL5  | -0.7234969 |
| TSR3    | -0.6078863 |
| TSSC4   | -0.6729727 |
| TSSK1   | -1.9900944 |
| TSSK2   | -1.6752961 |
| TSSK3   | -1.6877873 |
| TSSK5   | -2.3464868 |

|            |            |
|------------|------------|
| TST        | -4.6288686 |
| TSTA3      | -1.9614835 |
| TSTD1      | -4.9854393 |
| TSTD2      | -0.560051  |
| TSTD3      | -3.1406922 |
| TSX        | -1.5832105 |
| TTBK1      | -3.5209665 |
| TTC1       | -0.528749  |
| TTC13      | -1.2606912 |
| TTC17      | -0.7041965 |
| TTC19      | -0.7391315 |
| TTC21B     | -0.6610699 |
| TTC23      | -3.75532   |
| TTC23L     | -1.0147252 |
| TTC27      | -0.7686191 |
| TTC30A1    | -0.6140471 |
| TTC30A2    | -0.6633139 |
| TTC30B     | -0.3367572 |
| TTC32      | -1.7088718 |
| TTC33      | -0.7129407 |
| TTC36      | -6.9433994 |
| TTC37      | -1.2999239 |
| TTC38      | -0.690722  |
| TTC39A     | -1.7272696 |
| TTC39C     | -4.19636   |
| TTC4       | -0.9283333 |
| TTC7       | -1.024199  |
| TTC8       | -0.6835606 |
| TTI1       | -0.2092691 |
| TTLL1      | -0.5750928 |
| TTLL12     | -1.5722656 |
| TTLL13     | -1.9148297 |
| TTLL5      | -1.5183945 |
| TTPA       | -4.353772  |
| TTR        | -5.3454533 |
| TTYH2      | -4.2531385 |
| TUB        | -0.8980579 |
| TUBA1C     | -0.3571186 |
| TUBA4A     | -1.1648278 |
| TUBB2A     | -1.6398635 |
| TUBB2A-PS2 | -0.651156  |
| TUBD1      | -1.0380719 |
| TUBE1      | -0.8285625 |
| TUBG1      | -2.3479095 |
| TUBGCP2    | -0.5288057 |

|         |            |
|---------|------------|
| TUBGCP4 | -0.9191995 |
| TUBGCP6 | -0.5797868 |
| TUFM    | -2.6478462 |
| TUG1    | -0.2691436 |
| TULP1   | -0.4612792 |
| TULP2   | -1.6817358 |
| TUSC2   | -1.9805927 |
| TUT1    | -0.3719306 |
| TVP23A  | -2.4158666 |
| TVP23B  | -0.5399389 |
| TWF1    | -0.8785625 |
| TWISTNB | -0.5104561 |
| TWSG1   | -0.9506235 |
| TXLNG   | -0.3851955 |
| TXN2    | -2.2895355 |
| TXNDC12 | -1.2529259 |
| TXNDC15 | -1.6677074 |
| TXNDC16 | -0.6804161 |
| TXNDC17 | -0.9221516 |
| TXNDC5  | -2.2659311 |
| TXNDC9  | -0.2625308 |
| TXNL4A  | -0.8033209 |
| TXNL4B  | -1.0969176 |
| TXNRD2  | -2.6442504 |
| TYK2    | -0.9068298 |
| TYMP    | -4.5362344 |
| TYMS-PS | -1.0066233 |
| TYSND1  | -2.9241729 |
| TYW1    | -1.6042962 |
| TYW5    | -0.551352  |
| UAP1    | -0.3264575 |
| UAP1L1  | -1.3567977 |
| UBA1    | -0.6348805 |
| UBA3    | -1.1688476 |
| UBA52   | -1.2846651 |
| UBAC1   | -1.0606337 |
| UBAC2   | -1.0480781 |
| UBAP1   | -0.5036316 |
| UBB     | -0.2353125 |
| UBC     | -1.1530094 |
| UBD     | -0.7601848 |
| UBE2A   | -0.7596293 |
| UBE2C   | -0.7089548 |
| UBE2CBP | -2.820042  |
| UBE2D1  | -0.377476  |

|          |            |
|----------|------------|
| UBE2D2B  | -1.3931465 |
| UBE2D3   | -0.3317118 |
| UBE2DNL1 | -1.6937118 |
| UBE2E1   | -0.3208947 |
| UBE2E2   | -1.4256268 |
| UBE2E3   | -0.7752338 |
| UBE2G1   | -1.0952506 |
| UBE2G2   | -0.4232001 |
| UBE2J1   | -0.1968184 |
| UBE2J2   | -0.231812  |
| UBE2K    | -0.1801152 |
| UBE2L3   | -0.669281  |
| UBE2L6   | -1.6207504 |
| UBE2M    | -0.7029905 |
| UBE2N    | -0.4652104 |
| UBE2Q1   | -0.1518693 |
| UBE2QL1  | -1.6596577 |
| UBE2U    | -3.4368787 |
| UBE2V1   | -0.9110727 |
| UBE2W    | -0.4234071 |
| UBE2Z    | -0.7816458 |
| UBE3B    | -1.1980443 |
| UBE3C    | -0.8338862 |
| UBE4A    | -1.838233  |
| UBE4B    | -0.9704332 |
| UBFD1    | -0.7537937 |
| UBIAD1   | -1.3636498 |
| UBL4     | -1.0202789 |
| UBL4B    | -2.5316432 |
| UBL5     | -0.8306322 |
| UBL7     | -1.0095162 |
| UBLCP1   | -0.4976983 |
| UBOX5    | -0.3090751 |
| UBQLN3   | -1.5490546 |
| UBQLN4   | -1.5713601 |
| UBR2     | -1.7580309 |
| UBR3     | -0.7554154 |
| UBR7     | -0.666254  |
| UBTD1    | -0.2123909 |
| UBTF     | -1.1007757 |
| UBXN1    | -1.7242427 |
| UBXN6    | -1.1937819 |
| UBXN8    | -0.8259115 |
| UCHL4    | -0.7152228 |
| UCHL5    | -0.1619711 |

|           |            |
|-----------|------------|
| UCK1      | -1.7878985 |
| UCKL1     | -0.9812965 |
| UCN       | -1.690512  |
| UCN3      | -3.680481  |
| UEVLD     | -1.5140715 |
| UFC1      | -1.3933969 |
| UFL1      | -0.5448389 |
| UFM1      | -0.2799578 |
| UFSP1     | -1.2727776 |
| UFSP2     | -1.4805083 |
| UGDH      | -1.9009099 |
| UGGT1     | -0.2967382 |
| UGP2      | -3.401771  |
| UGT1A10   | -5.242904  |
| UGT1A6A   | -1.1328678 |
| UGT1A6B   | -4.4122806 |
| UGT2A3    | -7.572547  |
| UGT2B1    | -9.054056  |
| UGT2B34   | -7.81163   |
| UGT2B35   | -6.716181  |
| UGT2B36   | -8.572332  |
| UGT2B37   | -8.770136  |
| UGT2B38   | -9.048931  |
| UGT2B5    | -8.972843  |
| UGT3A1    | -6.378687  |
| UGT3A2    | -7.442036  |
| UHMK1     | -0.5020418 |
| UHRF1BP1  | -1.0682192 |
| UHRF1BP1L | -0.4807711 |
| UHRF2     | -0.9713974 |
| ULBP1     | -0.7070899 |
| ULK1      | -0.5483818 |
| ULK2      | -1.2273064 |
| ULK3      | -0.7563682 |
| UMODL1    | -1.7183838 |
| UMPS      | -2.2518692 |
| UNC119    | -0.7130842 |
| UNC119B   | -1.3977365 |
| UNC13A    | -1.0752382 |
| UNC45BOS  | -1.2406023 |
| UNC50     | -0.9259663 |
| UNC5A     | -2.1526098 |
| UNC5CL    | -1.3900652 |
| UNC80     | -1.6920214 |
| UNC93A    | -2.8635252 |



|         |            |
|---------|------------|
| UNC93B1 | -0.9307189 |
| UNG     | -0.8052788 |
| UNKL    | -0.3821333 |
| UOX     | -5.184049  |
| UPB1    | -5.964579  |
| UPF1    | -1.8495188 |
| UPK1A   | -0.4848051 |
| UPK3A   | -1.574023  |
| UPK3B   | -0.6035395 |
| UPP2    | -9.130705  |
| UQCC1   | -2.0999436 |
| UQCC2   | -1.5043197 |
| UQCR10  | -2.0510054 |
| UQCR11  | -2.6377616 |
| UQCRB   | -1.997117  |
| UQCRC1  | -2.828179  |
| UQCRC2  | -1.965877  |
| UQCRFS1 | -2.3827767 |
| UQCRH   | -1.9179673 |
| UQCRQ   | -2.3231878 |
| URAD    | -2.850862  |
| URAH    | -3.5602365 |
| URGCP   | -0.8724022 |
| URI1    | -0.5957398 |
| URM1    | -0.6525445 |
| UROC1   | -9.498556  |
| UROD    | -2.5050216 |
| UROS    | -2.737069  |
| USE1    | -0.5226307 |
| USF1    | -0.2712207 |
| USF2    | -0.9689789 |
| USH1C   | -1.5262744 |
| USH1G   | -1.0690603 |
| USH2A   | -1.4901569 |
| USHBP1  | -2.3006978 |
| USMG2   | -2.173302  |
| USMG5   | -1.6877332 |
| USO1    | -0.6157713 |
| USP10   | -1.5152378 |
| USP12   | -0.4571405 |
| USP15   | -0.4490838 |
| USP17LA | -1.3076537 |
| USP17LC | -2.347426  |
| USP17LD | -1.794174  |
| USP17LE | -2.0353432 |

|        |            |
|--------|------------|
| USP19  | -0.486125  |
| USP2   | -2.0970716 |
| USP21  | -1.748538  |
| USP24  | -0.3460033 |
| USP28  | -0.5762529 |
| USP30  | -0.7850714 |
| USP35  | -0.7309878 |
| USP38  | -1.2605562 |
| USP4   | -0.5558868 |
| USP40  | -1.4044304 |
| USP44  | -1.3308933 |
| USP45  | -0.4325609 |
| USP46  | -0.6744537 |
| USP5   | -1.2321472 |
| USP50  | -1.5860891 |
| USP8   | -0.9102652 |
| USP9Y  | -2.1030543 |
| USPL1  | -0.2245507 |
| UTP11L | -0.3410506 |
| UTP14B | -2.6049032 |
| UTP15  | -0.4694922 |
| UTP3   | -0.4985924 |
| UVRAG  | -0.7125349 |
| UXS1   | -0.1752207 |
| UXT    | -0.8958335 |
| V1RD19 | -1.6340773 |
| VAC14  | -1.3017726 |
| VAMP1  | -0.9305089 |
| VAMP7  | -1.0830307 |
| VAMP8  | -0.396204  |
| VAPB   | -1.7496295 |
| VARS   | -0.7647371 |
| VARS2  | -1.3146844 |
| VASH1  | -1.6274328 |
| VASH2  | -1.4812171 |
| VAT1   | -0.7392163 |
| VAV2   | -1.3214126 |
| VAX1   | -1.6499355 |
| VAX2   | -1.7443502 |
| VAX2OS | -1.2486501 |
| VCP    | -0.6997533 |
| VCPIP1 | -0.1470461 |
| VCPKMT | -0.9322949 |
| VDAC1  | -1.9883261 |
| VDAC2  | -0.4317446 |

|          |            |
|----------|------------|
| VDAC3    | -0.9959021 |
| VEGFB    | -1.7650652 |
| VGLL2    | -1.1856704 |
| VIMP     | -0.4284782 |
| VIPAS39  | -0.4769688 |
| VIPR1    | -4.9936085 |
| VKORC1   | -4.7914476 |
| VKORC1L1 | -0.6509085 |
| VMA21    | -1.0266004 |
| VMAC     | -2.315084  |
| VMN1R1   | -1.0383024 |
| VMN1R104 | -2.0690904 |
| VMN1R118 | -1.7252147 |
| VMN1R122 | -1.3648086 |
| VMN1R124 | -1.6817596 |
| VMN1R131 | -1.671824  |
| VMN1R132 | -1.030827  |
| VMN1R139 | -1.6886086 |
| VMN1R148 | -1.2867193 |
| VMN1R157 | -1.6006827 |
| VMN1R17  | -1.7531867 |
| VMN1R171 | -1.7491872 |
| VMN1R172 | -1.6114497 |
| VMN1R176 | -1.6205344 |
| VMN1R178 | -0.8107522 |
| VMN1R18  | -1.7104108 |
| VMN1R180 | -1.6261954 |
| VMN1R191 | -1.398561  |
| VMN1R192 | -3.7833383 |
| VMN1R193 | -1.7409992 |
| VMN1R194 | -1.6114852 |
| VMN1R20  | -1.6379197 |
| VMN1R203 | -1.689857  |
| VMN1R210 | -1.2199988 |
| VMN1R212 | -1.3360701 |
| VMN1R219 | -1.5368805 |
| VMN1R220 | -3.3349798 |
| VMN1R223 | -1.6646342 |
| VMN1R225 | -1.4711068 |
| VMN1R226 | -1.2516551 |
| VMN1R227 | -0.981359  |
| VMN1R228 | -1.6415207 |
| VMN1R230 | -1.5839384 |
| VMN1R231 | -1.4387023 |
| VMN1R235 | -1.640718  |

|            |            |
|------------|------------|
| VMN1R25    | -0.7121491 |
| VMN1R26    | -1.7422469 |
| VMN1R32    | -1.6038995 |
| VMN1R33    | -2.8835523 |
| VMN1R37    | -1.1105182 |
| VMN1R4     | -4.4668636 |
| VMN1R43    | -1.6199121 |
| VMN1R48    | -3.5280044 |
| VMN1R5     | -1.7227914 |
| VMN1R51    | -1.8101552 |
| VMN1R53    | -3.563468  |
| VMN1R55    | -1.6247292 |
| VMN1R56    | -3.3579428 |
| VMN1R58    | -1.1503732 |
| VMN1R64    | -1.6200852 |
| VMN1R67    | -2.4204307 |
| VMN1R72    | -1.4809167 |
| VMN1R74    | -1.2847579 |
| VMN1R75    | -1.6927505 |
| VMN1R76    | -1.0455844 |
| VMN1R77    | -1.7113574 |
| VMN1R8     | -1.6307187 |
| VMN1R83    | -1.7033477 |
| VMN1R84    | -1.6325402 |
| VMN1R86    | -1.6550055 |
| VMN1R-PS1C | -1.6565742 |
| VMN1R-PS7C | -1.8627305 |
| VMN2R1     | -3.6534882 |
| VMN2R10    | -1.5276661 |
| VMN2R100   | -1.6752515 |
| VMN2R101   | -1.3041339 |
| VMN2R102   | -1.586905  |
| VMN2R106   | -1.5901494 |
| VMN2R107   | -1.6028533 |
| VMN2R108   | -1.6361265 |
| VMN2R110   | -1.1526527 |
| VMN2R111   | -1.4426374 |
| VMN2R112   | -1.6273158 |
| VMN2R116   | -1.8751035 |
| VMN2R120   | -1.8895102 |
| VMN2R121   | -0.7565613 |
| VMN2R17    | -1.6170249 |
| VMN2R18    | -1.6142473 |
| VMN2R20    | -1.4217787 |
| VMN2R24    | -1.6366656 |

|            |            |
|------------|------------|
| VMN2R27    | -1.2586076 |
| VMN2R28    | -1.6527419 |
| VMN2R29    | -1.4719839 |
| VMN2R3     | -0.5490038 |
| VMN2R33    | -1.6515801 |
| VMN2R35    | -1.2420945 |
| VMN2R37    | -1.6283367 |
| VMN2R39    | -1.5129104 |
| VMN2R4     | -0.9832194 |
| VMN2R42    | -1.6193838 |
| VMN2R43    | -1.0474145 |
| VMN2R54    | -2.260507  |
| VMN2R56    | -1.4349248 |
| VMN2R58    | -1.5014689 |
| VMN2R59    | -2.4354334 |
| VMN2R62    | -0.7796435 |
| VMN2R67    | -1.9135091 |
| VMN2R77    | -1.55968   |
| VMN2R80    | -2.4561236 |
| VMN2R81    | -1.2629254 |
| VMN2R82    | -2.187932  |
| VMN2R83    | -1.4926848 |
| VMN2R85    | -1.1652567 |
| VMN2R91    | -1.6587329 |
| VMN2R94    | -2.155592  |
| VMN2R96    | -0.9035294 |
| VMN2R98    | -0.8799233 |
| VMN2R-PS54 | -1.8947883 |
| VMN2R-PS57 | -1.6273808 |
| VMO1       | -5.6898165 |
| VNN1       | -1.7932482 |
| VNN3       | -1.932426  |
| VPREB1     | -2.0717251 |
| VPS11      | -0.9437108 |
| VPS13D     | -0.6646338 |
| VPS16      | -0.3141127 |
| VPS18      | -0.3156567 |
| VPS25      | -1.8729434 |
| VPS26A     | -0.4433093 |
| VPS26B     | -1.2254691 |
| VPS28      | -0.3781056 |
| VPS29      | -0.7462711 |
| VPS33A     | -0.6789722 |
| VPS35      | -0.751255  |
| VPS37A     | -0.9170013 |

|         |            |
|---------|------------|
| VPS37B  | -1.1420865 |
| VPS41   | -1.6224484 |
| VPS45   | -1.539526  |
| VPS4A   | -0.304421  |
| VPS52   | -0.4624462 |
| VPS72   | -0.1943255 |
| VPS9D1  | -0.8628736 |
| VRK2    | -0.8286805 |
| VRK3    | -0.638062  |
| VRTN    | -1.64908   |
| VSIG1   | -1.9514289 |
| VSIG4   | -9.938963  |
| VSNL1   | -0.5162935 |
| VSTM2A  | -0.7136922 |
| VSTM2B  | -2.7308939 |
| VSTM2L  | -1.6158257 |
| VTA1    | -0.3505368 |
| VTN     | -4.1575184 |
| VWA5B1  | -0.9786229 |
| VWA5B2  | -1.3844278 |
| VWA8    | -2.8855438 |
| VWC2    | -1.0672154 |
| VWCE    | -5.536394  |
| VWDE    | -2.6183357 |
| WAPAL   | -0.175137  |
| WASF1   | -1.6726851 |
| WASF3   | -0.5797279 |
| WASH    | -0.8821731 |
| WASL    | -0.9330149 |
| WBP1    | -1.8299217 |
| WBP11   | -0.1671877 |
| WBP1L   | -1.8293839 |
| WBP2    | -0.7136679 |
| WBP4    | -1.0867229 |
| WBSCR16 | -1.7503486 |
| WBSCR22 | -0.8743286 |
| WBSCR27 | -2.3510442 |
| WDFY1   | -0.4929586 |
| WDFY2   | -0.3206825 |
| WDR11   | -1.1438398 |
| WDR12   | -0.9112783 |
| WDR17   | -2.488937  |
| WDR18   | -2.2870803 |
| WDR20   | -0.6503215 |
| WDR24   | -1.8891649 |

|         |            |
|---------|------------|
| WDR25   | -1.7275059 |
| WDR26   | -0.1823783 |
| WDR33   | -0.7360444 |
| WDR34   | -1.722939  |
| WDR36   | -0.7660923 |
| WDR4    | -0.812037  |
| WDR41   | -0.4164057 |
| WDR45   | -0.2941837 |
| WDR46   | -0.6707468 |
| WDR5    | -1.2632194 |
| WDR53   | -1.0658212 |
| WDR55   | -0.980227  |
| WDR59   | -0.3434279 |
| WDR6    | -0.6969833 |
| WDR61   | -1.5260296 |
| WDR62   | -0.5105515 |
| WDR64   | -1.0848787 |
| WDR70   | -0.3926165 |
| WDR72   | -2.531302  |
| WDR73   | -1.0985222 |
| WDR74   | -0.926723  |
| WDR77   | -0.6615429 |
| WDR81   | -1.424736  |
| WDR82   | -0.9850736 |
| WDR83   | -1.0540295 |
| WDR83OS | -1.3196669 |
| WDR86   | -1.0548041 |
| WDR88   | -1.1950793 |
| WDR89   | -0.8824329 |
| WDR90   | -1.0340002 |
| WDR91   | -0.4139757 |
| WDR93   | -1.4263208 |
| WDTC1   | -1.4078064 |
| WEE1    | -0.7870145 |
| WEE2    | -0.8815894 |
| WFDC1   | -0.8470049 |
| WFDC11  | -1.2168851 |
| WFDC13  | -1.6932604 |
| WFDC15A | -2.0404346 |
| WFDC8   | -1.1615522 |
| WHAMM   | -0.7010679 |
| WIPI2   | -0.7578797 |
| WISP1   | -0.4571433 |
| WNT2    | -2.6439838 |
| WNT3    | -1.4810946 |

|          |            |
|----------|------------|
| WNT5B    | -3.3556018 |
| WNT8A    | -1.6875329 |
| WNT9B    | -4.114805  |
| WRAP53   | -0.6244226 |
| WRAP73   | -1.4397244 |
| WRB      | -0.699285  |
| WRN      | -0.5728564 |
| WRNIP1   | -1.6795254 |
| WVOX     | -1.3559139 |
| WWP1     | -1.1972866 |
| XAB2     | -0.5574484 |
| XCL1     | -0.6452403 |
| XCR1     | -2.6569176 |
| XIAP     | -0.3072863 |
| XIST     | -0.4322038 |
| XK       | -1.6627691 |
| XKR4     | -2.217393  |
| XKR6     | -1.48101   |
| XKR7     | -1.1987617 |
| XKR8     | -1.3213727 |
| XKR9     | -6.1679688 |
| XLR      | -0.5686834 |
| XLR5B    | -1.8001378 |
| XLR5C    | -1.4181046 |
| XNTRPC   | -0.2025311 |
| XPA      | -0.4811654 |
| XPC      | -0.9294038 |
| XPO1     | -0.398941  |
| XPO5     | -0.4569807 |
| XPO6     | -0.195291  |
| XPOT     | -0.8999596 |
| XPR1     | -0.4216161 |
| XRCC1    | -0.3375998 |
| XRCC3    | -2.4315898 |
| XRCC4    | -0.4422369 |
| XRCC5    | -1.0954351 |
| XRCC6    | -1.482449  |
| XRCC6BP1 | -2.6694453 |
| XRRA1    | -1.6442406 |
| XYLB     | -4.3323402 |
| XYLT2    | -1.9245458 |
| YAF2     | -0.5988793 |
| YAP1     | -0.2615218 |
| YARS2    | -1.7656589 |
| YBEY     | -2.0112267 |



|         |            |
|---------|------------|
| YBX1    | -0.4260426 |
| YEATS2  | -0.5265231 |
| YES1    | -0.7512052 |
| YIF1A   | -2.4144807 |
| YIF1B   | -1.4837174 |
| YIPF1   | -1.1137705 |
| YIPF2   | -1.584795  |
| YIPF3   | -1.5622077 |
| YIPF4   | -0.828927  |
| YIPF5   | -0.779429  |
| YJEFN3  | -0.3697324 |
| YKT6    | -0.2307377 |
| YLPM1   | -0.7294924 |
| YME1L1  | -1.3808489 |
| YOD1    | -0.9436002 |
| YPEL2   | -1.5431168 |
| YPEL3   | -0.7235136 |
| YRDC    | -0.1678252 |
| YTHDF3  | -0.6156802 |
| YWHAB   | -0.2835527 |
| YWHAE   | -0.1702523 |
| YWHAG   | -0.5936451 |
| YY1     | -0.5006294 |
| ZADH2   | -1.6411123 |
| ZAN     | -1.3179762 |
| ZAP70   | -0.4097562 |
| ZAR1    | -1.1082559 |
| ZAR1L   | -1.1602147 |
| ZBED5   | -1.5831366 |
| ZBTB1   | -0.1743116 |
| ZBTB12  | -0.450922  |
| ZBTB18  | -0.4836164 |
| ZBTB20  | -1.234601  |
| ZBTB3   | -0.587322  |
| ZBTB33  | -0.5297551 |
| ZBTB39  | -0.6706891 |
| ZBTB40  | -0.8718867 |
| ZBTB44  | -1.3210263 |
| ZBTB45  | -0.5505981 |
| ZBTB48  | -1.9417262 |
| ZBTB7B  | -1.0716863 |
| ZBTB7C  | -1.6666837 |
| ZBTB8A  | -0.9581428 |
| ZBTB8OS | -1.2792206 |
| ZBTB9   | -0.2952161 |

|          |            |
|----------|------------|
| ZBTBD6   | -1.1090536 |
| ZC2HC1B  | -2.5369663 |
| ZC2HC1C  | -2.848624  |
| ZC3H14   | -0.7177644 |
| ZC3H18   | -1.1614261 |
| ZC3H7B   | -0.7825971 |
| ZC3H8    | -1.0333598 |
| ZC3HAV1L | -1.6096127 |
| ZC3HC1   | -0.5644846 |
| ZC4H2    | -1.5434351 |
| ZCCHC16  | -1.0327415 |
| ZCCHC17  | -0.6551309 |
| ZCCHC2   | -0.4245577 |
| ZCCHC24  | -1.7493234 |
| ZCCHC4   | -0.6289337 |
| ZCCHC5   | -2.309787  |
| ZCCHC9   | -0.8288155 |
| ZCWPW2   | -1.1920507 |
| ZDBF2    | -1.4526093 |
| ZDHHC11  | -1.7966115 |
| ZDHHC12  | -1.304853  |
| ZDHHC14  | -0.876787  |
| ZDHHC16  | -0.3444743 |
| ZDHHC2   | -0.2088609 |
| ZDHHC4   | -0.7604704 |
| ZDHHC5   | -0.3072071 |
| ZDHHC6   | -1.8769612 |
| ZDHHC7   | -0.4879808 |
| ZDHHC9   | -2.6233358 |
| ZER1     | -1.0698528 |
| ZFAND1   | -1.6621294 |
| ZFAND2B  | -1.5180788 |
| ZFAND3   | -0.8668113 |
| ZFAND4   | -2.9939592 |
| ZFHX2    | -1.3258414 |
| ZFHX2OS  | -1.6600385 |
| ZFHX4    | -4.033253  |
| ZFP108   | -1.8372321 |
| ZFP109   | -0.8969376 |
| ZFP112   | -1.1814516 |
| ZFP113   | -1.0646293 |
| ZFP114   | -1.0776641 |
| ZFP119A  | -0.4867101 |
| ZFP119B  | -0.6814866 |
| ZFP128   | -0.8301673 |

|           |            |
|-----------|------------|
| ZFP13     | -2.2356987 |
| ZFP133-PS | -0.6883049 |
| ZFP148    | -0.3059568 |
| ZFP157    | -0.8681812 |
| ZFP174    | -2.585528  |
| ZFP189    | -1.2669501 |
| ZFP191    | -0.687408  |
| ZFP2      | -1.6676781 |
| ZFP213    | -1.1666107 |
| ZFP219    | -0.4941397 |
| ZFP229    | -0.7859645 |
| ZFP235    | -0.8947122 |
| ZFP264    | -3.673889  |
| ZFP266    | -0.3549366 |
| ZFP27     | -0.9051852 |
| ZFP273    | -1.019011  |
| ZFP275    | -0.5662437 |
| ZFP276    | -0.7600446 |
| ZFP277    | -0.9368167 |
| ZFP280B   | -0.856597  |
| ZFP282    | -1.6893036 |
| ZFP286IT  | -1.5986271 |
| ZFP30     | -1.1152477 |
| ZFP300    | -1.6757491 |
| ZFP316    | -0.8847961 |
| ZFP318    | -0.6854186 |
| ZFP324    | -0.8157485 |
| ZFP335    | -0.6146593 |
| ZFP335OS  | -0.4766769 |
| ZFP345    | -0.8772397 |
| ZFP346    | -0.6652319 |
| ZFP354A   | -1.7613626 |
| ZFP354B   | -2.8914113 |
| ZFP358    | -0.7852216 |
| ZFP362    | -0.3002815 |
| ZFP367    | -0.8870034 |
| ZFP369    | -0.4285743 |
| ZFP37     | -0.2515836 |
| ZFP383    | -0.4868357 |
| ZFP385A   | -2.0051668 |
| ZFP385B   | -4.40189   |
| ZFP386    | -0.131053  |
| ZFP389    | -1.971026  |
| ZFP39     | -1.400101  |
| ZFP395    | -2.6337838 |

|        |            |
|--------|------------|
| ZFP398 | -0.59443   |
| ZFP408 | -0.3600631 |
| ZFP41  | -0.6517205 |
| ZFP418 | -0.1714129 |
| ZFP420 | -0.670382  |
| ZFP422 | -0.4545603 |
| ZFP426 | -0.1600323 |
| ZFP428 | -0.4608598 |
| ZFP438 | -0.2130539 |
| ZFP442 | -1.0023456 |
| ZFP444 | -1.8868532 |
| ZFP454 | -3.104201  |
| ZFP455 | -0.802381  |
| ZFP457 | -0.3207536 |
| ZFP467 | -1.3625784 |
| ZFP507 | -0.5082166 |
| ZFP523 | -0.3014259 |
| ZFP524 | -1.6900334 |
| ZFP526 | -0.4930835 |
| ZFP54  | -0.9461474 |
| ZFP551 | -0.6949637 |
| ZFP553 | -0.2545404 |
| ZFP563 | -1.0930426 |
| ZFP57  | -0.6420448 |
| ZFP574 | -0.6729817 |
| ZFP575 | -1.1580672 |
| ZFP59  | -0.326062  |
| ZFP598 | -0.7628741 |
| ZFP60  | -1.4955435 |
| ZFP606 | -1.0885484 |
| ZFP612 | -0.5689926 |
| ZFP617 | -1.0709949 |
| ZFP618 | -1.3256948 |
| ZFP619 | -0.4060457 |
| ZFP623 | -1.7857754 |
| ZFP629 | -0.6420589 |
| ZFP637 | -1.4710236 |
| ZFP639 | -0.5928445 |
| ZFP64  | -0.2470121 |
| ZFP646 | -0.5354514 |
| ZFP647 | -0.6708012 |
| ZFP648 | -0.8311701 |
| ZFP65  | -0.3644385 |
| ZFP655 | -0.1950479 |
| ZFP658 | -0.5197959 |

|         |            |
|---------|------------|
| ZFP661  | -1.8516755 |
| ZFP663  | -0.4051414 |
| ZFP672  | -0.5074692 |
| ZFP688  | -0.8839259 |
| ZFP689  | -0.2066708 |
| ZFP691  | -1.3292351 |
| ZFP706  | -0.8212171 |
| ZFP707  | -3.0837402 |
| ZFP708  | -0.7711184 |
| ZFP710  | -0.5667186 |
| ZFP72   | -1.1437438 |
| ZFP735  | -0.9170976 |
| ZFP746  | -0.641078  |
| ZFP748  | -1.1634986 |
| ZFP750  | -2.7447195 |
| ZFP759  | -2.1427016 |
| ZFP760  | -1.6004229 |
| ZFP763  | -0.2910786 |
| ZFP768  | -1.0670905 |
| ZFP770  | -0.9690652 |
| ZFP771  | -1.7837076 |
| ZFP772  | -0.7048583 |
| ZFP78   | -1.0478973 |
| ZFP780B | -0.9387014 |
| ZFP784  | -1.459619  |
| ZFP786  | -2.1841712 |
| ZFP787  | -1.5741959 |
| ZFP788  | -1.2468059 |
| ZFP791  | -1.3083296 |
| ZFP799  | -1.3979652 |
| ZFP804A | -1.6760402 |
| ZFP809  | -0.2563644 |
| ZFP820  | -2.1274285 |
| ZFP825  | -1.9277375 |
| ZFP846  | -1.2246761 |
| ZFP85   | -1.2890306 |
| ZFP87   | -0.4622245 |
| ZFP870  | -0.7093236 |
| ZFP872  | -1.0244527 |
| ZFP873  | -2.177307  |
| ZFP874B | -0.3571963 |
| ZFP879  | -1.9037771 |
| ZFP882  | -0.5644178 |
| ZFP91   | -0.6108327 |
| ZFP930  | -0.8803105 |

|          |            |
|----------|------------|
| ZFP931   | -1.0416126 |
| ZFP932   | -0.5807242 |
| ZFP934   | -0.4238114 |
| ZFP936   | -1.0949836 |
| ZFP937   | -0.5997019 |
| ZFP938   | -0.9545827 |
| ZFP939   | -1.6937449 |
| ZFP94    | -1.0264864 |
| ZFP940   | -0.7015328 |
| ZFP941   | -1.495451  |
| ZFP944   | -0.6356647 |
| ZFP946   | -1.6196861 |
| ZFP949   | -1.0192585 |
| ZFP950   | -0.7488005 |
| ZFP951   | -0.3559508 |
| ZFP952   | -0.401927  |
| ZFP953   | -1.0059519 |
| ZFP954   | -0.3192744 |
| ZFP955A  | -1.4059768 |
| ZFP955B  | -0.6061506 |
| ZFP957   | -0.2649598 |
| ZFP958   | -1.2883854 |
| ZFP960   | -1.0566678 |
| ZFP961   | -0.5331245 |
| ZFP963   | -0.4941857 |
| ZFPL1    | -0.6894717 |
| ZFPM1    | -1.960269  |
| ZFR      | -1.2148521 |
| ZFY1     | -1.3097651 |
| ZFY2     | -2.7168732 |
| ZFYVE1   | -1.8164353 |
| ZFYVE19  | -1.4599099 |
| ZFYVE21  | -2.2227402 |
| ZFYVE26  | -1.52812   |
| ZFYVE28  | -1.9252491 |
| ZFYVE9   | -0.759254  |
| ZGPAT    | -1.631002  |
| ZHX3     | -1.210597  |
| ZIC1     | -1.0948002 |
| ZIC4     | -1.3157275 |
| ZIC5     | -1.1813748 |
| ZIM1     | -1.3422484 |
| ZKSCAN1  | -0.6084642 |
| ZKSCAN14 | -1.1160212 |
| ZKSCAN16 | -3.0746303 |

|          |            |
|----------|------------|
| ZKSCAN17 | -0.5569801 |
| ZKSCAN3  | -0.3017435 |
| ZKSCAN4  | -1.8372707 |
| ZKSCAN5  | -1.0020394 |
| ZKSCAN8  | -0.6982675 |
| ZMAT1    | -1.3726618 |
| ZMAT3    | -0.4318614 |
| ZMAT4    | -1.3690608 |
| ZMAT5    | -1.2636614 |
| ZMIZ2    | -0.537849  |
| ZMPSTE24 | -1.1168337 |
| ZMYM1    | -0.6570191 |
| ZMYM3    | -0.937675  |
| ZMYND19  | -0.1799526 |
| ZMYND8   | -0.2323532 |
| ZNF512B  | -0.8476887 |
| ZNHIT1   | -1.2996345 |
| ZNHIT2   | -1.8292503 |
| ZNHIT3   | -1.0103617 |
| ZNHIT6   | -0.1870761 |
| ZNRD1AS  | -2.3594403 |
| ZNRF2    | -0.5885527 |
| ZNRF3    | -1.3738713 |
| ZP1      | -2.0712807 |
| ZP3R     | -2.3104022 |
| ZPLD1    | -1.5526125 |
| ZPR1     | -0.9173865 |
| ZRANB1   | -0.7476792 |
| ZRANB3   | -1.8049607 |
| ZRSR1    | -0.2796769 |
| ZSCAN10  | -0.7501235 |
| ZSCAN12  | -0.560328  |
| ZSCAN2   | -2.273354  |
| ZSCAN20  | -1.2400317 |
| ZSCAN21  | -0.3587513 |
| ZSCAN22  | -0.5402293 |
| ZSCAN30  | -0.9924054 |
| ZSCAN5B  | -1.5995142 |
| ZSWIM3   | -1.2042015 |
| ZSWIM7   | -1.7282052 |
| ZW10     | -0.4529448 |
| ZWILCH   | -0.9867985 |
| ZWINT    | -0.5934844 |
| ZXDA     | -1.1882601 |
| ZZEF1    | -0.5848031 |

|         |            |
|---------|------------|
| A2M     | 7.2065787  |
| A4GALT  | 2.7443328  |
| AAK1    | 1.3366456  |
| AATK    | 0.46369505 |
| ABCA13  | 2.4918537  |
| ABCA5   | 1.0903335  |
| ABCA7   | 0.68332815 |
| ABCB1B  | 2.0724988  |
| ABCC1   | 2.1055856  |
| ABCC4   | 0.77191114 |
| ABCC5   | 2.4138522  |
| ABCC8   | 2.4315066  |
| ABCG1   | 1.1635904  |
| ABCG4   | 0.77188253 |
| ABHD10  | 0.46079636 |
| ABHD12B | 0.4730091  |
| ABHD17B | 0.60601425 |
| ABI1    | 0.64861584 |
| ABI3BP  | 0.40216637 |
| ABL2    | 1.1587157  |
| ABLIM1  | 1.0918784  |
| ABR     | 0.35466385 |
| ABRACL  | 0.5111575  |
| ACAP2   | 0.7977457  |
| ACBD7   | 1.9961214  |
| ACE     | 3.4124956  |
| ACE2    | 0.90740705 |
| ACER2   | 2.6563773  |
| ACER3   | 0.2334733  |
| ACIN1   | 1.1716027  |
| ACKR1   | 2.0599256  |
| ACKR2   | 3.583117   |
| ACKR3   | 5.6239386  |
| ACOT10  | 1.7456484  |
| ACOT11  | 1.0842681  |
| ACOT7   | 0.1851492  |
| ACOT9   | 1.626926   |
| ACOXL   | 3.2790728  |
| ACPP    | 3.5119743  |
| ACR     | 1.9189188  |
| ACSBG1  | 1.3422587  |
| ACSL4   | 0.4519782  |
| ACSS1   | 4.6325116  |
| ACTA1   | 7.4759855  |
| ACTA2   | 2.3175282  |



|           |            |
|-----------|------------|
| ACTC1     | 7.828638   |
| ACTG1     | 0.56870604 |
| ACTG2     | 3.3097267  |
| ACTN1     | 1.0153422  |
| ACTN2     | 3.0967836  |
| ACTN3     | 4.4331603  |
| ACTR3     | 0.8534827  |
| ACVR1B    | 2.0386577  |
| ADA       | 0.99431705 |
| ADAM10    | 0.5015373  |
| ADAM15    | 2.6910124  |
| ADAM17    | 0.76101685 |
| ADAM19    | 2.3637643  |
| ADAM28    | 1.8852489  |
| ADAM5     | 1.0757778  |
| ADAM6B    | 1.0266879  |
| ADAM8     | 4.68837    |
| ADAM9     | 0.7043028  |
| ADAMTS1   | 3.95584    |
| ADAMTS10  | 0.38521552 |
| ADAMTS15  | 5.281989   |
| ADAMTS17  | 1.0086801  |
| ADAMTS2   | 0.48466396 |
| ADAMTS3   | 0.3919499  |
| ADAMTS4   | 7.0927734  |
| ADAMTS5   | 1.6260872  |
| ADAMTS8   | 2.8479133  |
| ADAMTS9   | 4.230517   |
| ADAMTSL2  | 1.4552464  |
| ADAMTSL4  | 3.0223527  |
| ADAMTSL5  | 0.72309995 |
| ADAP1     | 0.4906969  |
| ADAR      | 0.5146613  |
| ADARB1    | 1.1634073  |
| ADC       | 1.0887959  |
| ADCY2     | 3.5287135  |
| ADCY4     | 1.4633937  |
| ADCY7     | 0.394547   |
| ADCY8     | 0.5544121  |
| ADCYAP1R1 | 1.8081543  |
| ADD3      | 1.01688    |
| ADIG      | 1.9138579  |
| ADIPOQ    | 1.9435654  |
| ADM       | 2.9166384  |
| ADNP2     | 0.5798702  |

|         |            |
|---------|------------|
| ADORA2A | 1.2464623  |
| ADORA2B | 5.587103   |
| ADORA3  | 3.2844253  |
| ADPRH   | 0.29191065 |
| ADPRHL1 | 1.2195015  |
| ADRA2A  | 0.6854391  |
| ADRB1   | 0.24358153 |
| ADRB2   | 2.944189   |
| ADRBK2  | 0.6003299  |
| AEBP1   | 2.6261678  |
| AEBP2   | 0.935339   |
| AFAP1   | 1.8625588  |
| AFAP1L1 | 1.9590831  |
| AFAP1L2 | 1.3049483  |
| AFF1    | 1.4630108  |
| AFF3    | 0.3518505  |
| AFF4    | 1.1178994  |
| AGAP1   | 1.679255   |
| AGAP2   | 0.7376065  |
| AGBL2   | 1.5770316  |
| AGER    | 7.174642   |
| AGFG1   | 1.3575649  |
| AGO2    | 0.61030865 |
| AGO3    | 0.3623898  |
| AGO4    | 1.0877199  |
| AGPAT4  | 4.4008875  |
| AGPAT5  | 0.5970764  |
| AGPS    | 0.7757335  |
| AGR2    | 6.5733433  |
| AGR3    | 4.6609035  |
| AGRN    | 0.77945757 |
| AGRP    | 1.696274   |
| AGTPBP1 | 0.8940098  |
| AGTRAP  | 0.5830946  |
| AHCYL2  | 1.6944757  |
| AHI1    | 2.2088456  |
| AHNAK   | 2.7929115  |
| AHNAK2  | 1.6070042  |
| AHSP    | 0.4341576  |
| AICDA   | 1.4669774  |
| AIDA    | 1.1465149  |
| AIF1L   | 2.3497734  |
| AIRN    | 0.6405573  |
| AK1     | 3.0148687  |
| AK8     | 3.4734786  |

|          |            |
|----------|------------|
| AK9      | 1.8419359  |
| AKAP12   | 5.9166346  |
| AKAP13   | 1.7116861  |
| AKAP14   | 1.2667782  |
| AKAP2    | 4.665906   |
| AKAP5    | 6.998942   |
| AKAP7    | 0.32310915 |
| AKAP8    | 0.68348217 |
| AKIRIN1  | 0.3199973  |
| AKIRIN2  | 0.17980766 |
| AKNA     | 1.5659981  |
| AKR1B3   | 0.64495754 |
| AKR1B8   | 1.6740813  |
| AKT3     | 2.3781142  |
| AKTIP    | 0.524879   |
| ALCAM    | 1.0982218  |
| ALDH18A1 | 0.42478848 |
| ALDH1A2  | 4.5681214  |
| ALDH1A3  | 3.9676023  |
| ALDH1L2  | 1.0397727  |
| ALDH3A1  | 2.514442   |
| ALDH3B1  | 1.1117353  |
| ALDH3B2  | 0.7473726  |
| ALDOA    | 0.98965216 |
| ALOX12B  | 1.0739849  |
| ALOX12E  | 6.555781   |
| ALOX15   | 1.2353365  |
| ALOX5    | 3.6861782  |
| ALOX5AP  | 1.53442    |
| ALOXE3   | 2.728931   |
| ALPK1    | 1.5371523  |
| ALPL     | 0.33979607 |
| ALS2CR12 | 1.1986711  |
| ALX3     | 0.29588652 |
| AMER1    | 0.47736216 |
| AMER3    | 1.8700514  |
| AMICA1   | 3.6281953  |
| AMIGO3   | 0.30338073 |
| AMMECR1  | 1.9314523  |
| AMN1     | 0.4502678  |
| AMOTL1   | 3.0520017  |
| AMOTL2   | 0.95969963 |
| AMPD1    | 1.4553063  |
| AMPD3    | 3.6675138  |
| AMPH     | 4.1467066  |

|          |            |
|----------|------------|
| ANGPT1   | 1.25211    |
| ANGPT2   | 5.5462933  |
| ANGPTL7  | 1.900383   |
| ANK1     | 1.2678173  |
| ANK2     | 0.6071234  |
| ANK3     | 0.8819506  |
| ANKHD1   | 0.42517662 |
| ANKK1    | 1.9777696  |
| ANKLE2   | 0.54739404 |
| ANKRD1   | 8.85924    |
| ANKRD11  | 0.77627945 |
| ANKRD12  | 2.1909251  |
| ANKRD2   | 3.6364188  |
| ANKRD22  | 2.32968    |
| ANKRD23  | 1.2159972  |
| ANKRD29  | 1.5274673  |
| ANKRD32  | 0.6293347  |
| ANKRD33B | 0.8206444  |
| ANKRD34A | 0.7972598  |
| ANKRD42  | 0.813395   |
| ANKRD44  | 1.8554144  |
| ANKRD45  | 0.79199505 |
| ANKRD49  | 0.3553133  |
| ANKRD50  | 0.21147251 |
| ANKRD61  | 1.8591456  |
| ANKRD66  | 1.0662458  |
| ANKS1    | 0.3651147  |
| ANO1     | 3.1286206  |
| ANO6     | 2.0842676  |
| ANO9     | 1.2638814  |
| ANP32B   | 0.66665745 |
| ANP32E   | 1.7674866  |
| ANTXR1   | 2.8490233  |
| ANTXRL   | 0.7593198  |
| ANXA1    | 3.6835198  |
| ANXA11   | 0.30202436 |
| ANXA2    | 2.512857   |
| ANXA3    | 3.489509   |
| ANXA8    | 4.088089   |
| AOAH     | 0.879622   |
| AOC1     | 5.3410373  |
| AP1M2    | 3.4579916  |
| AP1S2    | 2.1364655  |
| AP1S3    | 0.55763865 |
| AP3B1    | 0.32087135 |

|          |            |
|----------|------------|
| APAF1    | 0.9755349  |
| APBA1    | 1.6339881  |
| APBA2    | 0.64835334 |
| APBB1    | 3.5707653  |
| APBB1IP  | 1.03932    |
| APBB2    | 0.95164204 |
| APCDD1   | 1.1898198  |
| APLF     | 0.6312213  |
| APLN     | 6.345137   |
| APLNR    | 1.6248503  |
| APLP1    | 1.1040235  |
| APOBEC2  | 1.8643334  |
| APOBR    | 1.693088   |
| APOD     | 9.883596   |
| APOL10B  | 0.91247797 |
| APOL6    | 1.3335619  |
| APOLD1   | 2.3787193  |
| APP      | 0.35473585 |
| APPBP2   | 0.15914583 |
| AQP1     | 0.31494188 |
| AQP3     | 5.1139183  |
| AQP4     | 0.859241   |
| AQP5     | 7.0784     |
| ARAP2    | 0.40344524 |
| ARAP3    | 1.7382498  |
| ARC      | 1.1547701  |
| AREG     | 3.660187   |
| ARF2     | 0.6303654  |
| ARF3     | 0.19903994 |
| ARFGAP3  | 1.2789273  |
| ARG2     | 4.4412627  |
| ARHGAP10 | 1.0613902  |
| ARHGAP12 | 0.46244907 |
| ARHGAP15 | 1.3509643  |
| ARHGAP18 | 0.58399343 |
| ARHGAP20 | 2.1653838  |
| ARHGAP22 | 3.4982204  |
| ARHGAP27 | 0.47386265 |
| ARHGAP28 | 0.9807823  |
| ARHGAP30 | 1.5547252  |
| ARHGAP31 | 2.7321448  |
| ARHGAP32 | 0.79277563 |
| ARHGAP44 | 2.1105042  |
| ARHGAP8  | 5.2059293  |
| ARHGAP9  | 1.2174025  |

|          |            |
|----------|------------|
| ARHGDI A | 0.3900447  |
| ARHGDI B | 1.1998277  |
| ARHGDI G | 5.3739905  |
| ARHGEF17 | 1.8938699  |
| ARHGEF2  | 1.5699229  |
| ARHGEF25 | 1.0446682  |
| ARHGEF28 | 4.620964   |
| ARHGEF3  | 0.5234585  |
| ARHGEF38 | 1.6840785  |
| ARHGEF4  | 0.67849946 |
| ARHGEF5  | 0.5478587  |
| ARHGEF6  | 0.62699556 |
| ARHGEF7  | 0.24330854 |
| ARID2    | 0.6690216  |
| ARID3A   | 3.1437898  |
| ARID4B   | 0.9028895  |
| ARID5A   | 4.1456447  |
| ARID5B   | 1.1577697  |
| ARIH1    | 0.24878883 |
| ARL10    | 0.8017764  |
| ARL11    | 1.0008967  |
| ARL13B   | 0.4171095  |
| ARL14EP  | 0.87542963 |
| ARL15    | 0.4314556  |
| ARL2     | 0.48054075 |
| ARL2BP   | 2.379047   |
| ARL4A    | 0.19501066 |
| ARL5B    | 0.50275517 |
| ARL5C    | 1.361805   |
| ARL6     | 0.41383505 |
| ARMC10   | 0.4339533  |
| ARMC2    | 2.8596714  |
| ARMC3    | 3.7484505  |
| ARMC4    | 4.490407   |
| ARMC5    | 0.18734074 |
| ARMCX2   | 1.2906728  |
| ARMCX3   | 0.8684406  |
| ARMCX4   | 1.273247   |
| ARMCX5   | 0.19295597 |
| ARPC1B   | 1.0394797  |
| ARPC2    | 0.2698655  |
| ARRB1    | 0.23127747 |
| ARRDC1   | 1.5219798  |
| ARRDC4   | 0.9243169  |
| ARSJ     | 2.27115    |

|         |            |
|---------|------------|
| ART1    | 4.865399   |
| ART3    | 2.3398752  |
| ART5    | 2.9173498  |
| ARTN    | 5.4937286  |
| ARXES2  | 2.6567032  |
| ASAP1   | 0.20982742 |
| ASB10   | 0.637691   |
| ASB11   | 4.470525   |
| ASB14   | 2.1052413  |
| ASB4    | 2.052301   |
| ASB5    | 2.5116143  |
| ASCC2   | 0.3439598  |
| ASCC3   | 0.1730485  |
| ASCL1   | 1.0725689  |
| ASCL2   | 2.0604243  |
| ASCL3   | 1.7005384  |
| ASF1A   | 0.53913593 |
| ASH1L   | 1.3373804  |
| ASNA1   | 0.2607913  |
| ASNS    | 1.9509606  |
| ASPH    | 0.1952982  |
| ASPRV1  | 6.210242   |
| ATAD2B  | 0.29108667 |
| ATAD5   | 0.592437   |
| ATF3    | 2.6758342  |
| ATF4    | 0.7780032  |
| ATF6    | 0.58386993 |
| ATF7    | 2.133397   |
| ATF7IP  | 0.4384346  |
| ATG9A   | 0.4759202  |
| ATL1    | 1.8685157  |
| ATN1    | 0.2720394  |
| ATP10A  | 3.4803429  |
| ATP10B  | 2.0638382  |
| ATP10D  | 1.346364   |
| ATP11A  | 2.940723   |
| ATP13A3 | 0.29248524 |
| ATP1A2  | 2.837651   |
| ATP1A3  | 1.4798594  |
| ATP1B1  | 1.9352155  |
| ATP1B3  | 0.33823824 |
| ATP2A1  | 2.049892   |
| ATP2A2  | 1.2082443  |
| ATP2A3  | 1.7190981  |
| ATP2B1  | 1.6543245  |

|             |            |
|-------------|------------|
| ATP2B4      | 1.023948   |
| ATP2C2      | 2.2710445  |
| ATP6V0A2    | 0.3906207  |
| ATP6V0A4    | 7.138808   |
| ATP6V0D2    | 1.6056919  |
| ATP6V0E     | 0.26350546 |
| ATP6V0E2    | 0.22987509 |
| ATP6V1A     | 0.166296   |
| ATP6V1B2    | 0.38823414 |
| ATP6V1C2    | 7.5452003  |
| ATP6V1G1    | 0.48621225 |
| ATP7A       | 1.355854   |
| ATP8A1      | 0.5051036  |
| ATP8B4      | 3.3254173  |
| ATP9B       | 1.5154617  |
| ATRNL1      | 0.85672283 |
| ATRX        | 0.5028515  |
| ATXN1       | 0.20537567 |
| ATXN1L      | 0.97922325 |
| ATXN2L      | 0.22788239 |
| ATXN7L1     | 1.7234182  |
| ATXN7L2     | 0.34552908 |
| ATXN7L3     | 0.30680466 |
| AUTS2       | 1.3652663  |
| AV356131    | 0.20625448 |
| AVL9        | 0.6800132  |
| AWAT1       | 2.489878   |
| B3GALNT1    | 0.6651993  |
| B3GLCT      | 1.39041    |
| B3GNT2      | 0.7646189  |
| B3GNT5      | 2.1088233  |
| B3GNT7      | 1.6535368  |
| B3GNT9      | 1.4635916  |
| B4GALNT2    | 1.2489076  |
| B4GALT1     | 0.24440956 |
| B4GALT2     | 1.2687407  |
| B4GALT3     | 1.1641154  |
| B4GALT4     | 1.5272846  |
| B630019K06I | 1.2388463  |
| B9D1        | 2.2985835  |
| B9D2        | 0.27642965 |
| BACH1       | 0.91364145 |
| BACH2       | 0.47232437 |
| BAG3        | 0.67496777 |
| BARX2       | 2.2083693  |



|          |            |
|----------|------------|
| BASP1    | 2.2311773  |
| BATF     | 2.5877538  |
| BATF2    | 1.8113384  |
| BAX      | 1.2816038  |
| BAZ1A    | 1.1274328  |
| BAZ1B    | 0.20035172 |
| BAZ2B    | 1.4615216  |
| BBIP1    | 0.7031963  |
| BBS1     | 1.2727149  |
| BBS12    | 0.98162866 |
| BBS2     | 2.0219204  |
| BBS9     | 0.6940646  |
| BBX      | 0.4076934  |
| BCAM     | 1.9476466  |
| BCAR3    | 0.8588128  |
| BCAS3OS2 | 2.127878   |
| BCAT1    | 1.3954945  |
| BCL10    | 0.5018387  |
| BCL11A   | 1.5929253  |
| BCL11B   | 0.6936431  |
| BCL2     | 1.0865707  |
| BCL2A1C  | 3.919363   |
| BCL2A1D  | 4.1602626  |
| BCL2L1   | 1.4546766  |
| BCL2L11  | 1.8221154  |
| BCL2L14  | 2.9706578  |
| BCL2L15  | 4.458628   |
| BCL3     | 1.3257661  |
| BCL6     | 1.4016328  |
| BCL6B    | 3.338097   |
| BCL9     | 2.523819   |
| BCLAF1   | 0.9622946  |
| BCR      | 0.635787   |
| BDKRB1   | 3.7758753  |
| BDKRB2   | 3.6149542  |
| BDNF     | 5.336873   |
| BDP1     | 1.1326938  |
| BEAN1    | 5.274341   |
| BEGAIN   | 2.906215   |
| BEND4    | 0.7625394  |
| BEND5    | 1.842613   |
| BEND7    | 1.4924805  |
| BEX1     | 1.5954494  |
| BEX2     | 2.9850297  |
| BEX4     | 2.574306   |

|         |            |
|---------|------------|
| BFSP1   | 1.9639428  |
| BFSP2   | 1.6615     |
| BGLAP2  | 2.003771   |
| BGLAP3  | 2.238791   |
| BGN     | 0.6709571  |
| BHLHA15 | 2.3194995  |
| BHLHE22 | 1.8763673  |
| BICC1   | 0.9781232  |
| BICD1   | 2.7220924  |
| BICD2   | 1.0506835  |
| BIK     | 0.19964552 |
| BIRC3   | 3.071001   |
| BLNK    | 2.9537716  |
| BLZF1   | 0.71276426 |
| BMF     | 2.975359   |
| BMP2K   | 1.6128349  |
| BMP3    | 3.3873382  |
| BMP4    | 2.1029367  |
| BMP5    | 1.1418114  |
| BMP6    | 1.0622997  |
| BMPER   | 2.035358   |
| BMPR1B  | 2.305198   |
| BMPR2   | 3.249743   |
| BMS1    | 1.533349   |
| BMX     | 2.6290512  |
| BNC2    | 1.4459596  |
| BNIPL   | 1.571778   |
| BOC     | 3.3505723  |
| BORA    | 1.7843876  |
| BPIFA1  | 10.922149  |
| BPIFA5  | 1.9994073  |
| BPIFB1  | 8.000013   |
| BPIFB5  | 4.4994617  |
| BPTF    | 0.32100058 |
| BRAF    | 0.95715284 |
| BRD1    | 1.7136269  |
| BRD2    | 0.6956892  |
| BRD4    | 0.3335948  |
| BRD8    | 1.8780925  |
| BRD9    | 0.20619678 |
| BRINP1  | 3.0697105  |
| BRIX1   | 0.6402807  |
| BRMS1L  | 0.8657789  |
| BROX    | 0.22849274 |
| BRPF1   | 0.7928996  |

|          |            |
|----------|------------|
| BRPF3    | 0.1758995  |
| BRSK1    | 1.9667923  |
| BRWD1    | 0.62532663 |
| BRWD3    | 0.15591598 |
| BSPRY    | 2.9231133  |
| BST1     | 4.2825694  |
| BTAF1    | 0.6142974  |
| BTBD10   | 1.2195215  |
| BTBD11   | 1.6974478  |
| BTBD17   | 1.9855504  |
| BTBD19   | 0.7910805  |
| BTBD7    | 1.1459227  |
| BTG1     | 0.70843744 |
| BTG2     | 1.9948053  |
| BTG3     | 3.4110565  |
| BTK      | 1.0940089  |
| BTLA     | 2.5660496  |
| BVES     | 3.662264   |
| BZW2     | 1.7309246  |
| C1GALT1  | 0.36894083 |
| C1QTNF7  | 2.2602978  |
| C2CD3    | 0.77960587 |
| C2CD4A   | 3.2541509  |
| C2CD4B   | 7.4819803  |
| C3AR1    | 1.1707668  |
| C5AR1    | 2.8329628  |
| C7       | 3.9511352  |
| CAB39    | 0.41304207 |
| CABYR    | 1.7443819  |
| CACHD1   | 1.6687093  |
| CACNA1C  | 3.2129717  |
| CACNA1D  | 2.0253427  |
| CACNA1S  | 1.910387   |
| CACNA2D1 | 3.4146247  |
| CACNA2D2 | 0.56573534 |
| CACNA2D4 | 1.4144635  |
| CACNB1   | 0.45416355 |
| CACNB3   | 1.6161375  |
| CAD      | 1.8777761  |
| CALCA    | 6.058815   |
| CALCR    | 2.9135382  |
| CALCRL   | 1.7199621  |
| CALM1    | 0.3385439  |
| CALM4    | 4.4943476  |
| CALML3   | 4.139661   |

|          |            |
|----------|------------|
| CAMK1G   | 0.55746436 |
| CAMK2B   | 0.19525313 |
| CAMK2D   | 1.714241   |
| CAMK4    | 1.8737667  |
| CAMKK1   | 2.1027699  |
| CAMKK2   | 0.6804576  |
| CAMP     | 1.5941138  |
| CAMSAP1  | 1.3944097  |
| CAMSAP2  | 1.947633   |
| CAMTA1   | 3.5590281  |
| CANT1    | 0.24240708 |
| CAP1     | 0.9168267  |
| CAP2     | 2.555084   |
| CAPG     | 2.7278523  |
| CAPN1    | 0.48457336 |
| CAPN13   | 2.968843   |
| CAPN2    | 0.38370037 |
| CAPN3    | 0.40033007 |
| CAPNS2   | 1.9179482  |
| CAPS2    | 2.261496   |
| CAPSL    | 2.6487556  |
| CAPZA2   | 0.3331933  |
| CAR12    | 3.704955   |
| CAR13    | 4.3833513  |
| CAR15    | 0.32285643 |
| CAR4     | 0.6754365  |
| CAR9     | 0.20292592 |
| CARD11   | 1.2655902  |
| CARD14   | 1.5869431  |
| CARTPT   | 0.71007824 |
| CASC1    | 4.0699186  |
| CASC3    | 0.1830287  |
| CASC4    | 1.1221623  |
| CASC5    | 1.1374378  |
| CASK     | 0.48916292 |
| CASKIN2  | 0.49213982 |
| CASP1    | 0.5162144  |
| CASP14   | 1.6616962  |
| CASP2    | 0.9110527  |
| CASP4    | 2.8428035  |
| CASP8AP2 | 0.99732256 |
| CASQ2    | 2.4086127  |
| CAST     | 0.5585551  |
| CASZ1    | 3.6035821  |
| CAV1     | 2.2938156  |

|          |            |
|----------|------------|
| CAV2     | 2.4731584  |
| CAV3     | 5.5553417  |
| CBFB     | 1.1386418  |
| CBL      | 2.7272897  |
| CBLB     | 1.9600844  |
| CBR2     | 9.680853   |
| CBR3     | 2.443677   |
| CC2D1B   | 0.169168   |
| CCBE1    | 0.6477227  |
| CCDC102A | 1.5376382  |
| CCDC103  | 1.5734601  |
| CCDC108  | 1.6236379  |
| CCDC109B | 1.9686408  |
| CCDC11   | 4.8027945  |
| CCDC113  | 6.4918284  |
| CCDC114  | 0.4096527  |
| CCDC115  | 0.24320412 |
| CCDC120  | 1.6253538  |
| CCDC121  | 2.7172954  |
| CCDC122  | 0.42529607 |
| CCDC127  | 0.25037003 |
| CCDC129  | 0.36143517 |
| CCDC13   | 2.5430412  |
| CCDC134  | 0.67078114 |
| CCDC135  | 1.5835619  |
| CCDC136  | 1.1635847  |
| CCDC146  | 0.616555   |
| CCDC147  | 3.0573192  |
| CCDC15   | 1.4245679  |
| CCDC150  | 2.2923582  |
| CCDC153  | 6.6003847  |
| CCDC155  | 1.3968811  |
| CCDC160  | 1.362072   |
| CCDC17   | 1.1630921  |
| CCDC170  | 3.3650217  |
| CCDC173  | 2.3109326  |
| CCDC174  | 0.6050067  |
| CCDC176  | 1.2464108  |
| CCDC181  | 1.3969383  |
| CCDC184  | 2.4858336  |
| CCDC19   | 5.78708    |
| CCDC30   | 1.2102933  |
| CCDC33   | 2.1596456  |
| CCDC37   | 1.8390851  |
| CCDC39   | 3.1718075  |

|         |            |
|---------|------------|
| CCDC40  | 1.8455067  |
| CCDC55  | 0.25490165 |
| CCDC59  | 0.893518   |
| CCDC64B | 3.3616867  |
| CCDC65  | 2.485494   |
| CCDC66  | 0.62846947 |
| CCDC67  | 1.222333   |
| CCDC69  | 0.56898737 |
| CCDC71L | 0.97746706 |
| CCDC77  | 0.52687883 |
| CCDC78  | 3.4403012  |
| CCDC81  | 3.5820189  |
| CCDC85A | 2.517708   |
| CCDC88A | 2.3118846  |
| CCDC88B | 1.5520749  |
| CCDC88C | 0.41129756 |
| CCDC9   | 0.9892726  |
| CCDC92  | 3.195003   |
| CCKAR   | 5.0054755  |
| CCL11   | 5.5829077  |
| CCL12   | 3.6947422  |
| CCL17   | 8.273239   |
| CCL19   | 0.84732723 |
| CCL2    | 4.757485   |
| CCL3    | 6.53883    |
| CCL4    | 5.2205024  |
| CCL5    | 1.4234304  |
| CCL6    | 1.2765617  |
| CCL7    | 4.9070687  |
| CCL8    | 1.6231565  |
| CCM2L   | 1.3715711  |
| CCNA1   | 2.1713903  |
| CCND2   | 2.3981524  |
| CCNG2   | 0.35839343 |
| CCNJ    | 1.1068811  |
| CCNJL   | 2.2190433  |
| CCNL1   | 1.797184   |
| CCNO    | 2.670817   |
| CCNT1   | 0.35364914 |
| CCNYL1  | 1.1431761  |
| CCP110  | 1.616705   |
| CCR10   | 0.8565016  |
| CCR1L1  | 0.67022014 |
| CCR6    | 3.0095925  |
| CCR7    | 5.3706584  |

|         |            |
|---------|------------|
| CCR8    | 1.2829981  |
| CCR9    | 1.0606472  |
| CCRL2   | 5.0130606  |
| CCRN4L  | 0.35151386 |
| CCSER1  | 0.8423929  |
| CCSER2  | 0.31437254 |
| CD101   | 0.5733988  |
| CD109   | 0.87665606 |
| CD14    | 3.3234658  |
| CD163L1 | 2.08489    |
| CD164L2 | 1.9889913  |
| CD177   | 4.6263504  |
| CD19    | 2.063467   |
| CD2     | 1.8432856  |
| CD200   | 5.6900983  |
| CD209D  | 0.6984861  |
| CD24A   | 4.82396    |
| CD274   | 2.644576   |
| CD28    | 1.5925064  |
| CD300A  | 0.37654948 |
| CD300LF | 2.9811935  |
| CD33    | 5.4307203  |
| CD34    | 3.710321   |
| CD36    | 0.7510772  |
| CD37    | 0.88880587 |
| CD3D    | 0.7945304  |
| CD3EAP  | 0.5718055  |
| CD3G    | 0.23918581 |
| CD40    | 2.668353   |
| CD44    | 1.7616911  |
| CD46    | 0.6207979  |
| CD47    | 0.16135263 |
| CD5     | 0.42009068 |
| CD52    | 0.6535735  |
| CD53    | 2.5473537  |
| CD55    | 0.6472006  |
| CD6     | 1.4332328  |
| CD63    | 1.6983638  |
| CD68    | 0.5078788  |
| CD69    | 4.6417212  |
| CD70    | 1.0856862  |
| CD72    | 0.28123522 |
| CD79A   | 1.8077974  |
| CD79B   | 1.3902636  |
| CD80    | 0.8098655  |

|          |            |
|----------|------------|
| CD83     | 1.1627526  |
| CD84     | 0.22798824 |
| CD8B1    | 1.2814999  |
| CD9      | 1.390902   |
| CD93     | 3.3717046  |
| CD97     | 0.68383884 |
| CDC14A   | 1.4707177  |
| CDC20B   | 0.21168661 |
| CDC25B   | 1.4985504  |
| CDC27    | 0.27277517 |
| CDC40    | 0.8685832  |
| CDC42BPA | 1.2503409  |
| CDC42BPG | 0.5696969  |
| CDC42EP2 | 1.2762041  |
| CDC42EP3 | 1.8976665  |
| CDC42EP4 | 1.2096     |
| CDC42SE1 | 0.9108987  |
| CDC42SE2 | 1.2562613  |
| CDC45    | 0.7477288  |
| CDC5L    | 0.8384385  |
| CDC73    | 0.46525002 |
| CDCA4    | 0.64884186 |
| CDCA7    | 0.9401078  |
| CDCP1    | 1.9657607  |
| CDH1     | 1.7390733  |
| CDH11    | 0.5327196  |
| CDH13    | 0.37985468 |
| CDH15    | 2.198609   |
| CDH16    | 4.95654    |
| CDH22    | 2.07887    |
| CDH5     | 2.4326844  |
| CDH6     | 0.6018317  |
| CDHR1    | 1.4401324  |
| CDHR3    | 3.1101274  |
| CDHR4    | 4.6430793  |
| CDK11B   | 0.19212723 |
| CDK12    | 0.5786009  |
| CDK14    | 1.9092455  |
| CDK19    | 0.44666433 |
| CDK2     | 0.14747453 |
| CDK5R1   | 0.9398625  |
| CDKL1    | 0.89513874 |
| CDKL2    | 1.3827043  |
| CDKL3    | 1.0263546  |
| CDKL4    | 1.2112346  |



|           |            |
|-----------|------------|
| CDKN1A    | 1.4450531  |
| CDKN1B    | 0.665205   |
| CDKN2B    | 5.3669114  |
| CDKN2D    | 1.6419034  |
| CDNF      | 1.0107567  |
| CDON      | 0.6535089  |
| CDPF1     | 0.16673756 |
| CDR2      | 1.0783377  |
| CDR2L     | 1.6421733  |
| CDS1      | 3.6804047  |
| CDSN      | 3.757984   |
| CDYL      | 0.44758224 |
| CDYL2     | 1.4177272  |
| CEACAM10  | 5.8022757  |
| CEACAM16  | 1.5498984  |
| CEBPB     | 0.39219904 |
| CEBPD     | 4.6307645  |
| CEBPE     | 0.49688435 |
| CECR2     | 0.600615   |
| CEL       | 0.6866791  |
| CELF2     | 1.2028112  |
| CELF4     | 0.96582556 |
| CELSR2    | 0.8347733  |
| CELSR3    | 4.5369973  |
| CEMIP     | 2.0549395  |
| CENPB     | 0.4725976  |
| CENPC1    | 0.17827415 |
| CENPE     | 0.22523165 |
| CENPT     | 0.27082014 |
| CENPU     | 0.5200627  |
| CEP104    | 0.79311705 |
| CEP112    | 0.95375943 |
| CEP112OS2 | 0.4197123  |
| CEP120    | 1.2543552  |
| CEP128    | 0.599025   |
| CEP135    | 0.61860085 |
| CEP162    | 0.53723717 |
| CEP170    | 1.2673423  |
| CEP192    | 0.40978575 |
| CEP290    | 0.9837284  |
| CEP55     | 1.230685   |
| CEP70     | 0.8594413  |
| CEP83     | 0.81804466 |
| CERCAM    | 0.90995383 |
| CERK      | 2.1451297  |

|         |            |
|---------|------------|
| CERS3   | 2.239508   |
| CERS4   | 1.1164756  |
| CERS5   | 1.5931201  |
| CERS6   | 0.95716524 |
| CETN3   | 0.31674957 |
| CETN4   | 1.8919706  |
| CFD     | 4.8568244  |
| CFL1    | 0.43809414 |
| CFLAR   | 1.3001046  |
| CFTR    | 0.4792502  |
| CGN     | 0.86172104 |
| CGNL1   | 0.27628803 |
| CH25H   | 7.183262   |
| CHAC1   | 2.5051117  |
| CHAD    | 4.531857   |
| CHAMP1  | 0.92563415 |
| CHD1    | 0.89768934 |
| CHD2    | 1.9298482  |
| CHD3OS  | 0.97828746 |
| CHD5    | 1.1835208  |
| CHD6    | 0.8503401  |
| CHD7    | 1.1162691  |
| CHEK1   | 1.2329934  |
| CHGB    | 1.7545896  |
| CHIA1   | 8.181061   |
| CHIC1   | 0.46574068 |
| CHIC2   | 1.405057   |
| CHIL1   | 3.880999   |
| CHIL3   | 5.754044   |
| CHIL4   | 5.5571346  |
| CHIL5   | 2.6596828  |
| CHIL6   | 1.0056129  |
| CHIT1   | 2.7802808  |
| CHL1    | 4.936417   |
| CHML    | 1.2541208  |
| CHMP4B  | 0.13383579 |
| CHMP4C  | 1.1182597  |
| CHN1    | 1.8133221  |
| CHPF    | 1.8613477  |
| CHRD2   | 0.8936224  |
| CHRM2   | 3.0229192  |
| CHRM3   | 3.3297048  |
| CHRNA1  | 0.531245   |
| CHRNA10 | 2.1309383  |
| CHRNA7  | 1.9779456  |

|        |            |
|--------|------------|
| CHRN1  | 3.2440066  |
| CHRN4  | 0.34744787 |
| CHST1  | 5.5949564  |
| CHST10 | 0.96929693 |
| CHST11 | 4.990838   |
| CHST12 | 1.9769082  |
| CHST14 | 0.24623299 |
| CHST3  | 1.8928556  |
| CHST5  | 1.2257805  |
| CHST8  | 3.1778116  |
| CHSY1  | 1.1518989  |
| CHTOP  | 0.24454975 |
| CIDEA  | 4.5570297  |
| CIDEC  | 2.4243078  |
| CILP   | 1.452029   |
| CIRBP  | 0.5397525  |
| CISH   | 1.7294979  |
| CITED1 | 2.424097   |
| CITED4 | 0.73223114 |
| CIZ1   | 0.40552473 |
| CKAP4  | 1.6467898  |
| CKAP5  | 0.54557705 |
| CKLF   | 1.3205361  |
| CKM    | 5.1026435  |
| CKMT1  | 0.9910264  |
| CKMT2  | 6.6989856  |
| CKS2   | 1.3774397  |
| CLASP1 | 0.31044292 |
| CLASP2 | 0.19679451 |
| CLASRP | 0.19547749 |
| CLCA3  | 6.1837773  |
| CLCA4  | 4.3555346  |
| CLCN5  | 0.5170121  |
| CLCN6  | 0.3389485  |
| CLCNKA | 3.352077   |
| CLCNKB | 0.96071434 |
| CLDN10 | 5.7931757  |
| CLDN18 | 1.3436415  |
| CLDN22 | 3.7501366  |
| CLDN25 | 0.74938107 |
| CLDN4  | 0.88523173 |
| CLDN5  | 4.118408   |
| CLDN7  | 4.5328107  |
| CLDN8  | 0.6912329  |
| CLEC2I | 1.5643034  |

|         |            |
|---------|------------|
| CLEC3B  | 0.23456502 |
| CLEC4A1 | 1.2584391  |
| CLEC4A4 | 1.5553758  |
| CLEC4B1 | 0.30899668 |
| CLEC4D  | 5.47831    |
| CLEC4E  | 4.3590746  |
| CLEC4N  | 0.16646624 |
| CLEC5A  | 0.866091   |
| CLGN    | 0.6017926  |
| CLIC1   | 1.6322613  |
| CLIC3   | 5.881249   |
| CLIC4   | 2.8400292  |
| CLIC5   | 4.494842   |
| CLIC6   | 6.652522   |
| CLIP1   | 0.99424314 |
| CLIP2   | 1.2785745  |
| CLIP3   | 2.4356375  |
| CLIP4   | 5.933529   |
| CLK1    | 0.51336575 |
| CLK2    | 0.57261944 |
| CLMP    | 2.8603787  |
| CLNK    | 2.6157265  |
| CLOCK   | 0.17567301 |
| CLSTN1  | 1.8436241  |
| CLSTN2  | 2.4245353  |
| CLTB    | 0.71789885 |
| CMIP    | 1.0427198  |
| CMKLR1  | 1.4992054  |
| CMPK2   | 0.6162143  |
| CMTM2A  | 0.6247802  |
| CMTM3   | 0.41342068 |
| CMTM7   | 0.16028261 |
| CMYA5   | 1.6536436  |
| CNBD2   | 0.93428683 |
| CNEP1R1 | 0.40834236 |
| CNFN    | 6.4835863  |
| CNGA2   | 2.1609383  |
| CNIH2   | 0.19697833 |
| CNIH4   | 0.7816324  |
| CNKSR1  | 2.8489976  |
| CNN1    | 4.9828286  |
| CNN2    | 1.3571105  |
| CNR1    | 1.6184568  |
| CNRIP1  | 0.19802761 |
| CNTLN   | 0.31700087 |

|         |            |
|---------|------------|
| CNTN1   | 3.7303617  |
| CNTRL   | 1.3312492  |
| COG3    | 0.6412649  |
| COG5    | 1.1174867  |
| COG7    | 0.45792246 |
| COL13A1 | 1.2725544  |
| COL17A1 | 0.90927386 |
| COL1A1  | 0.8451123  |
| COL1A2  | 0.92870426 |
| COL23A1 | 4.0986013  |
| COL26A1 | 0.7831056  |
| COL4A1  | 3.485456   |
| COL4A2  | 3.1843548  |
| COL4A3  | 3.5774088  |
| COL4A4  | 1.5852437  |
| COL4A5  | 1.5017471  |
| COL4A6  | 0.99782467 |
| COL5A2  | 0.65350795 |
| COL6A1  | 2.4246302  |
| COL6A2  | 1.3582196  |
| COL7A1  | 2.5420294  |
| COL8A2  | 0.57147074 |
| COLQ    | 0.5436468  |
| COMP    | 1.6020968  |
| COQ10B  | 0.3890624  |
| CORO1A  | 1.295774   |
| CORO2A  | 1.676475   |
| COTL1   | 0.54456425 |
| COX4I2  | 1.2531247  |
| COX6A2  | 6.1593204  |
| COX7A1  | 0.5115533  |
| COX8B   | 7.2794237  |
| CPA3    | 2.5612206  |
| CPD     | 1.91225    |
| CPE     | 4.2104187  |
| CPEB1   | 1.6113124  |
| CPEB4   | 1.1997147  |
| CPM     | 1.4794192  |
| CPNE1   | 0.51383924 |
| CPNE2   | 0.5458536  |
| CPNE5   | 0.9371314  |
| CPNE7   | 2.281767   |
| CPNE8   | 1.6859794  |
| CPSF2   | 0.4605217  |
| CPSF6   | 0.5330181  |

|            |            |
|------------|------------|
| CPSF7      | 0.5755248  |
| CPT1B      | 0.34046578 |
| CPXM1      | 0.22376108 |
| CRABP2     | 0.24504185 |
| CRAMP1L    | 0.61678267 |
| CRCT1      | 5.215367   |
| CREB1      | 0.953758   |
| CREB3      | 0.23549366 |
| CREB3L1    | 2.7341866  |
| CREB3L2    | 0.6686063  |
| CREB3L4    | 1.1809232  |
| CREBL2     | 1.0230389  |
| CREBRF     | 1.5788527  |
| CRELD2     | 0.714643   |
| CREM       | 0.8491454  |
| CRH        | 0.47937036 |
| CRHR2      | 1.5591264  |
| CRIM1      | 2.1227512  |
| CRIP1      | 0.4781642  |
| CRISP1     | 1.0950298  |
| CRISP3     | 2.8233502  |
| CRISPLD1   | 0.8282716  |
| CRISPLD2   | 6.0018287  |
| CRK        | 0.74908686 |
| CRLF1      | 4.996998   |
| CRLF2      | 0.6269026  |
| CRLF3      | 0.71938705 |
| CRMP1      | 1.7798634  |
| CRNDE      | 1.873357   |
| CRTAM      | 1.0368414  |
| CRY2       | 0.24657154 |
| CRYAA      | 1.6519778  |
| CRYAB      | 1.9682083  |
| CRYBG3     | 2.577444   |
| CRYZL1     | 0.31294584 |
| CSDC2      | 0.29986238 |
| CSF1       | 1.0551028  |
| CSF2       | 5.5412235  |
| CSF2RA     | 1.3021107  |
| CSF2RB     | 1.2450933  |
| CSF2RB2    | 0.95553493 |
| CSF3       | 8.046267   |
| CSF3R      | 0.99356747 |
| CSGALNACT1 | 3.609693   |
| CSGALNACT2 | 1.5204363  |

|           |            |
|-----------|------------|
| CSMD1     | 1.3604131  |
| CSNK1A1   | 0.21262932 |
| CSNK1D    | 0.41595507 |
| CSNK1E    | 1.5740066  |
| CSNK1G1   | 0.9012122  |
| CSPG4     | 4.0293517  |
| CSRNP1    | 3.7563806  |
| CSRNP3    | 0.81416774 |
| CSRP1     | 1.3497181  |
| CST6      | 2.5759563  |
| CST7      | 1.2837925  |
| CST8      | 2.6491768  |
| CSTAD     | 0.57046175 |
| CSTF2     | 0.33340406 |
| CTBP2     | 2.036871   |
| CTBS      | 0.5999882  |
| CTDP1     | 0.87746525 |
| CTDSPL    | 1.0211415  |
| CTDSPL2   | 0.56725574 |
| CTGF      | 1.4051666  |
| CTLA2A    | 4.459965   |
| CTLA2B    | 3.7224922  |
| CTLA4     | 2.512858   |
| CTNNA1    | 1.6428509  |
| CTNNAL1   | 0.19779062 |
| CTNNB1    | 1.1639414  |
| CTNND2    | 0.36662745 |
| CTPS      | 3.6517568  |
| CTSK      | 4.3999357  |
| CTSS      | 0.598156   |
| CTTNBP2NL | 3.2830043  |
| CTXN1     | 1.5404203  |
| CTXN3     | 2.6771405  |
| CUEDC1    | 1.024734   |
| CUL3      | 0.43369055 |
| CUL7      | 1.3379593  |
| CUX1      | 0.51067114 |
| CWC22     | 1.8699756  |
| CWC25     | 0.17738914 |
| CWC27     | 1.2528267  |
| CWH43     | 0.7637129  |
| CX3CL1    | 4.4861307  |
| CX3CR1    | 0.9450669  |
| CXCL1     | 4.8407164  |
| CXCL10    | 2.8854737  |

|         |            |
|---------|------------|
| CXCL13  | 1.6614156  |
| CXCL14  | 7.74806    |
| CXCL15  | 8.608767   |
| CXCL16  | 1.6186166  |
| CXCL17  | 9.459671   |
| CXCL2   | 8.005163   |
| CXCL3   | 6.8541846  |
| CXCL5   | 9.573448   |
| CXCR1   | 3.6259289  |
| CXCR2   | 2.995656   |
| CXCR4   | 2.9280877  |
| CXCR5   | 2.146194   |
| CXX1A   | 0.50634956 |
| CYB561  | 3.0965843  |
| CYB5R1  | 0.589756   |
| CYBA    | 1.075324   |
| CYBB    | 1.9064674  |
| CYBRD1  | 1.337338   |
| CYFIP2  | 2.0215716  |
| CYLD    | 0.64007664 |
| CYP19A1 | 1.0287013  |
| CYP1B1  | 2.6143527  |
| CYP27B1 | 3.1043828  |
| CYP2S1  | 5.272146   |
| CYP4B1  | 3.1571708  |
| CYP4F18 | 2.1380315  |
| CYPT4   | 1.4000764  |
| CYR61   | 2.8100152  |
| CYSTM1  | 0.8439679  |
| CYTH3   | 3.1382012  |
| CYTH4   | 0.5125756  |
| CYTIP   | 4.1168647  |
| CYTL1   | 3.6377263  |
| CYYR1   | 3.982131   |
| DAAM2   | 1.4254098  |
| DAB2    | 1.2231922  |
| DAB2IP  | 0.66550064 |
| DACH1   | 3.8423562  |
| DACT1   | 0.5672326  |
| DACT3   | 0.7968936  |
| DAF2    | 1.2230177  |
| DAG1    | 0.61250734 |
| DAGLA   | 1.84884    |
| DAPL1   | 2.456394   |
| DAPP1   | 1.9813213  |



|         |            |
|---------|------------|
| DAW1    | 0.797246   |
| DAXX    | 2.1629348  |
| DAZAP2  | 0.29705238 |
| DBF4    | 0.35379124 |
| DBH     | 4.1688323  |
| DBN1    | 4.367948   |
| DBNDD1  | 2.783011   |
| DCBLD1  | 0.2703042  |
| DCBLD2  | 0.3343675  |
| DCLK1   | 1.1925161  |
| DCLK2   | 2.04671    |
| DCLRE1C | 1.9226453  |
| DCP1A   | 0.3098774  |
| DCP2    | 1.3601141  |
| DCSTAMP | 2.1316977  |
| DCTN1   | 0.73771334 |
| DCTN6   | 0.23736143 |
| DCUN1D3 | 1.3313808  |
| DDIT3   | 1.18191    |
| DDIT4   | 2.108601   |
| DDR1    | 2.7817817  |
| DDR2    | 2.715528   |
| DDX21   | 0.7093415  |
| DDX23   | 0.5961275  |
| DDX24   | 0.3473177  |
| DDX26B  | 1.3843794  |
| DDX39B  | 0.22737074 |
| DDX3X   | 0.6380415  |
| DDX43   | 0.6122713  |
| DDX50   | 0.6143775  |
| DDX55   | 0.45569372 |
| DDX6    | 1.3606424  |
| DEDD2   | 0.58357143 |
| DEF6    | 1.3457236  |
| DEFB14  | 2.0498672  |
| DEFB3   | 2.8454156  |
| DEK     | 0.28932142 |
| DENND1B | 0.841774   |
| DENND1C | 0.52888346 |
| DENND3  | 2.7999816  |
| DENND5A | 0.51198816 |
| DEP1    | 1.3594849  |
| DES     | 2.219245   |
| DGCR14  | 0.92470646 |
| DGKA    | 1.416256   |

|        |            |
|--------|------------|
| DGKD   | 0.5166707  |
| DGKE   | 1.3860915  |
| DGKH   | 3.7183967  |
| DGKK   | 1.2747622  |
| DHH    | 1.438005   |
| DHRS7C | 2.9363155  |
| DHRS9  | 2.2282422  |
| DHX38  | 0.34468746 |
| DHX40  | 0.6534333  |
| DHX9   | 1.9179304  |
| DIAP1  | 0.90290356 |
| DIAP2  | 0.60783625 |
| DIAP3  | 0.3160596  |
| DIEXF  | 0.36940956 |
| DIMT1  | 0.42836618 |
| DIO2   | 9.652472   |
| DIP2A  | 0.706975   |
| DIP2B  | 0.45579767 |
| DIRAS2 | 4.01054    |
| DIS3   | 0.7115421  |
| DISP2  | 1.3613477  |
| DKK3   | 1.767766   |
| DKKL1  | 1.2978234  |
| DLG5   | 0.9987216  |
| DLGAP4 | 0.91085434 |
| DLK1   | 0.86974597 |
| DLL1   | 2.4160118  |
| DMBT1  | 2.2664905  |
| DMKN   | 5.453204   |
| DMRT2  | 2.3503942  |
| DMRT3  | 0.95298624 |
| DMXL1  | 1.031713   |
| DMXL2  | 1.138067   |
| DNAAF3 | 0.4636674  |
| DNAH10 | 3.0324562  |
| DNAH11 | 4.142297   |
| DNAH12 | 2.809088   |
| DNAH2  | 4.034205   |
| DNAH5  | 3.9452493  |
| DNAH6  | 6.061873   |
| DNAH7A | 2.0709274  |
| DNAH7B | 3.1041949  |
| DNAH8  | 1.5461068  |
| DNAH9  | 2.465602   |
| DNAIC2 | 4.272363   |

|          |            |
|----------|------------|
| DNAJA4   | 1.38136    |
| DNAJB13  | 1.4873986  |
| DNAJB3   | 3.4263446  |
| DNAJB4   | 0.25064516 |
| DNAJB5   | 1.0860071  |
| DNAJB6   | 0.6603284  |
| DNAJC2   | 1.0225315  |
| DNAJC21  | 0.5080147  |
| DNAJC27  | 1.1463492  |
| DNAJC5   | 0.29902315 |
| DNAJC5B  | 1.7924893  |
| DNAJC7   | 0.3870926  |
| DNALI1   | 4.5762854  |
| DNASE2A  | 0.8203993  |
| DNHD1    | 0.9193196  |
| DNM2     | 0.23360348 |
| DNM3     | 1.0003035  |
| DNM3OS   | 0.98696065 |
| DNMT3BOS | 0.5545821  |
| DNMT3L   | 3.5395665  |
| DNTTIP2  | 0.45906878 |
| DOC2B    | 3.556512   |
| DOCK10   | 1.673655   |
| DOCK11   | 1.2261362  |
| DOCK2    | 1.1569562  |
| DOCK5    | 0.4048009  |
| DOCK9    | 2.2024713  |
| DOK1     | 1.0827999  |
| DOK2     | 0.18289328 |
| DOK3     | 1.3562422  |
| DOK4     | 1.526084   |
| DOK7     | 3.3916028  |
| DONSON   | 1.1640496  |
| DOPEY1   | 0.90028405 |
| DPCR1    | 1.6703572  |
| DPEP1    | 3.8499856  |
| DPEP2    | 3.02142    |
| DPH5     | 0.5291734  |
| DPP10    | 0.6304188  |
| DPP8     | 0.6772213  |
| DPT      | 2.3631687  |
| DPYSL2   | 1.5059271  |
| DPYSL3   | 2.9750195  |
| DRAM1    | 2.7588     |
| DRC1     | 2.1682858  |

|          |            |
|----------|------------|
| DROSHA   | 0.9348221  |
| DSEL     | 1.3198547  |
| DSG3     | 0.4623623  |
| DST      | 1.0159683  |
| DSTN     | 0.1764059  |
| DSTYK    | 1.4879174  |
| DTNA     | 1.6372299  |
| DTX1     | 1.4066434  |
| DTX2     | 1.9116006  |
| DTX3     | 0.9507394  |
| DUOXA1   | 1.3815567  |
| DUOXA2   | 1.2095034  |
| DUSP1    | 3.857088   |
| DUSP11   | 0.79501605 |
| DUSP13   | 1.2152278  |
| DUSP14   | 1.014121   |
| DUSP16   | 1.2796755  |
| DUSP18   | 2.1271942  |
| DUSP2    | 3.9149075  |
| DUSP26   | 2.9294915  |
| DUSP4    | 3.2240245  |
| DUSP5    | 2.79953    |
| DUSP7    | 1.2820086  |
| DUSP8    | 3.2829816  |
| DVL3     | 1.231308   |
| DYDC2    | 2.4299078  |
| DYNAP    | 1.5522134  |
| DYNC1H1  | 0.5500159  |
| DYNC1I2  | 0.58768797 |
| DYNC1LI1 | 1.4214706  |
| DYNC1LI2 | 1.4021964  |
| DYNC2H1  | 1.3470964  |
| DYNC2LI1 | 2.9674716  |
| DYNLRB2  | 8.80906    |
| DYNLT1A  | 0.78816867 |
| DYNLT1C  | 1.0337367  |
| DYNLT1F  | 0.67005396 |
| DYRK3    | 1.3223963  |
| DYSF     | 0.25615597 |
| DYX1C1   | 1.1809108  |
| DZANK1   | 2.63483    |
| DZIP1    | 1.6179934  |
| E2F2     | 0.65682316 |
| E4F1     | 0.3242545  |
| EAR1     | 4.0522494  |

|          |            |
|----------|------------|
| EAR10    | 3.8875475  |
| EAR12    | 4.2082705  |
| EAR2     | 3.9892182  |
| EAR6     | 2.2070785  |
| EBF1     | 3.3563814  |
| EBI3     | 2.363996   |
| EBNA1BP2 | 0.22906494 |
| ECM2     | 0.8160243  |
| ECSCR    | 2.17487    |
| ECT2L    | 1.9027202  |
| EDIL3    | 2.524869   |
| EDN1     | 4.9202104  |
| EDNRA    | 1.7291737  |
| EEA1     | 1.2201004  |
| EED      | 0.29332256 |
| EEF1A2   | 3.1962636  |
| EEF1E1   | 1.1183119  |
| EFCAB1   | 2.3982387  |
| EFCAB10  | 4.5282474  |
| EFCAB12  | 1.855454   |
| EFCAB14  | 0.4938922  |
| EFCAB4A  | 1.1112347  |
| EFEMP2   | 0.78975105 |
| EFHB     | 4.1146836  |
| EFHC1    | 3.3240995  |
| EFHD2    | 0.95327425 |
| EFNA4    | 1.2684247  |
| EFNB1    | 0.526773   |
| EFNB2    | 2.3216267  |
| EFNB3    | 0.27200246 |
| EFR3B    | 3.887547   |
| EFS      | 1.0249844  |
| EFTUD2   | 1.5908709  |
| EGFBP2   | 0.19810843 |
| EGFL6    | 2.7183878  |
| EGFL7    | 0.9178195  |
| EGR1     | 0.41730022 |
| EGR2     | 3.9559503  |
| EHBP1L1  | 0.81090117 |
| EHD1     | 1.3660254  |
| EHD2     | 3.2438827  |
| EHD4     | 1.9289122  |
| EHF      | 4.300137   |
| EID1     | 0.93145275 |
| EID2     | 3.9040122  |

|           |            |
|-----------|------------|
| EIF2AK2   | 0.8426924  |
| EIF2B2    | 0.319736   |
| EIF2B3    | 0.29552364 |
| EIF3C     | 0.5991993  |
| EIF4A1    | 0.4107151  |
| EIF4ENIF1 | 1.2874894  |
| EIF5A2    | 0.8243532  |
| ELAVL4    | 0.32562137 |
| ELF1      | 0.86856365 |
| ELF2      | 0.62656546 |
| ELF3      | 2.5801086  |
| ELF4      | 1.1586041  |
| ELF5      | 5.431818   |
| ELK4      | 1.2293129  |
| ELMO2     | 0.7146597  |
| ELMOD1    | 3.4171882  |
| ELMSAN1   | 0.9634919  |
| ELN       | 1.0540895  |
| ELOVL1    | 0.1496191  |
| ELOVL4    | 2.1038587  |
| ELOVL7    | 1.6380758  |
| EMB       | 4.255826   |
| EMCN      | 1.0940475  |
| EMD       | 0.43854332 |
| EMID1     | 1.2962017  |
| EMILIN2   | 2.1258817  |
| EML1      | 3.585463   |
| EMP1      | 4.5079474  |
| EMP2      | 3.5100389  |
| EMP3      | 1.3537674  |
| ENAH      | 3.3857625  |
| ENC1      | 2.355824   |
| ENDOD1    | 2.0784945  |
| ENDOU     | 0.60876846 |
| ENG       | 0.43058062 |
| ENKD1     | 0.5568061  |
| ENKUR     | 4.1844397  |
| ENO2      | 2.7049823  |
| ENO3      | 1.5834808  |
| ENO4      | 2.909813   |
| ENPP4     | 1.0653744  |
| ENTPD1    | 2.884561   |
| ENTPD3    | 5.8374615  |
| EOGT      | 1.3971562  |
| EOMES     | 0.48299003 |

|           |            |
|-----------|------------|
| EP300     | 0.40212202 |
| EPAS1     | 0.8851433  |
| EPB4.1L2  | 1.6449103  |
| EPB4.1L4A | 1.139332   |
| EPC1      | 0.5452509  |
| EPC2      | 0.42985106 |
| EPCAM     | 3.2727299  |
| EPDR1     | 3.4764965  |
| EPHA2     | 0.57496643 |
| EPHA4     | 3.056079   |
| EPHA8     | 1.8676498  |
| EPHX4     | 3.7079318  |
| EPN2      | 1.3484159  |
| EPN3      | 0.8890171  |
| EPS15     | 0.5731368  |
| EPS8      | 1.9411278  |
| EPS8L1    | 3.5431304  |
| EPS8L3    | 1.0219197  |
| ERBB2     | 2.6842203  |
| ERBB2IP   | 0.5935888  |
| ERCC1     | 0.87798595 |
| ERCC5     | 0.251482   |
| EREG      | 4.437129   |
| ERG       | 2.450957   |
| ERI1      | 0.66618633 |
| ERICH1    | 0.625227   |
| ERICH2    | 3.0290182  |
| ERICH3    | 5.4724245  |
| ERO1L     | 0.39776754 |
| ESAM      | 2.456534   |
| ESCO1     | 0.96294737 |
| ESM1      | 2.0918303  |
| ESR2      | 0.6966429  |
| ESRP1     | 3.0489547  |
| ESYT1     | 0.38986015 |
| ESYT2     | 0.95545006 |
| ESYT3     | 3.2532496  |
| ETF1      | 0.4711547  |
| ETL4      | 0.43286037 |
| ETNK1     | 0.38278008 |
| ETS1      | 1.5334663  |
| ETS2      | 2.0293736  |
| ETV1      | 0.6774001  |
| ETV3      | 3.1949697  |
| ETV5      | 1.128377   |

|         |            |
|---------|------------|
| ETV6    | 0.76832294 |
| EVA1B   | 0.41902733 |
| EVA1C   | 3.8473196  |
| EVC2    | 0.7923207  |
| EVI2A   | 0.8003874  |
| EVL     | 0.270689   |
| EVPL    | 3.6613913  |
| EWSR1   | 0.6064644  |
| EXOC1   | 0.26292515 |
| EXOC2   | 0.7683153  |
| EXOC4   | 0.19583225 |
| EXOC5   | 0.49619532 |
| EXOC6B  | 1.4458432  |
| EYA2    | 6.1446366  |
| EYA4    | 1.2231836  |
| EZH1    | 0.5554161  |
| EZR     | 2.2270389  |
| F13A1   | 4.8126597  |
| F2R     | 2.1768146  |
| F2RL2   | 0.64329004 |
| F3      | 4.8698463  |
| FABP12  | 1.3849623  |
| FABP3   | 6.6053147  |
| FABP4   | 3.049491   |
| FADS3   | 3.185155   |
| FAIM    | 0.22408009 |
| FAIM3   | 0.8145304  |
| FAM101B | 2.6410878  |
| FAM102B | 0.8570647  |
| FAM105A | 3.18562    |
| FAM107A | 0.7507024  |
| FAM110A | 0.6450405  |
| FAM110C | 0.8641374  |
| FAM111A | 0.4170518  |
| FAM115A | 0.42880654 |
| FAM117A | 0.22704363 |
| FAM117B | 1.2929072  |
| FAM118A | 0.25170755 |
| FAM124B | 1.9233091  |
| FAM129A | 0.6888099  |
| FAM129B | 3.0456567  |
| FAM129C | 0.29804444 |
| FAM131A | 2.352652   |
| FAM132A | 0.6434126  |
| FAM132B | 1.5082331  |



|          |            |
|----------|------------|
| FAM133B  | 1.2688603  |
| FAM134B  | 0.7009492  |
| FAM13B   | 0.20198488 |
| FAM13C   | 3.7658625  |
| FAM150A  | 1.8687518  |
| FAM150B  | 0.44994545 |
| FAM154B  | 4.079402   |
| FAM160A1 | 0.8718219  |
| FAM161A  | 1.1723218  |
| FAM161B  | 1.8021436  |
| FAM162B  | 3.944257   |
| FAM166B  | 2.3131757  |
| FAM167A  | 1.4605436  |
| FAM168B  | 0.36259317 |
| FAM174B  | 2.0647254  |
| FAM178B  | 1.2172163  |
| FAM179A  | 5.407874   |
| FAM179B  | 0.6450181  |
| FAM183B  | 6.3541665  |
| FAM188A  | 0.40233278 |
| FAM189A2 | 4.054531   |
| FAM196A  | 0.6926522  |
| FAM198B  | 2.7167506  |
| FAM199X  | 0.9168966  |
| FAM19A5  | 1.5834615  |
| FAM206A  | 0.4042225  |
| FAM208A  | 0.4622078  |
| FAM208B  | 0.97191334 |
| FAM209   | 0.43572164 |
| FAM212B  | 3.6362805  |
| FAM216A  | 1.1857367  |
| FAM216B  | 4.7272143  |
| FAM217B  | 1.4462852  |
| FAM220A  | 0.3300047  |
| FAM221A  | 1.5226665  |
| FAM222B  | 0.23898935 |
| FAM26E   | 1.609801   |
| FAM3B    | 0.68479824 |
| FAM43A   | 1.0931149  |
| FAM46B   | 6.5000186  |
| FAM46C   | 1.6921902  |
| FAM49A   | 0.7110071  |
| FAM49B   | 0.7711866  |
| FAM53B   | 0.27738905 |
| FAM57A   | 0.6321571  |

|         |            |
|---------|------------|
| FAM60A  | 3.6731892  |
| FAM63B  | 0.46034145 |
| FAM65A  | 0.56261206 |
| FAM65B  | 3.4340932  |
| FAM69B  | 1.2823317  |
| FAM71F2 | 3.354558   |
| FAM73A  | 1.1068163  |
| FAM76A  | 1.1062894  |
| FAM76B  | 0.8162937  |
| FAM78B  | 3.0854611  |
| FAM81B  | 1.6880338  |
| FAM83E  | 3.366245   |
| FAM84A  | 0.37940073 |
| FAM92B  | 5.123412   |
| FAM98B  | 0.3893695  |
| FANCA   | 0.4160552  |
| FANK1   | 2.5716565  |
| FAP     | 2.3911748  |
| FAR1    | 2.3578644  |
| FARP1   | 1.4838195  |
| FAS     | 0.19836473 |
| FASL    | 0.7055867  |
| FAT1    | 0.38503885 |
| FAT2    | 0.3941741  |
| FBL     | 0.4968753  |
| FBLIM1  | 2.4606376  |
| FBLN1   | 2.0992432  |
| FBN1    | 2.0831356  |
| FBP2    | 3.7770627  |
| FBXL12  | 0.5189953  |
| FBXL13  | 1.7816765  |
| FBXL14  | 0.3191433  |
| FBXL16  | 2.7391646  |
| FBXL2   | 0.7737596  |
| FBXL20  | 0.41846132 |
| FBXL22  | 0.522135   |
| FBXL3   | 0.7473254  |
| FBXL5   | 1.670013   |
| FBXL7   | 0.27924967 |
| FBXO10  | 0.47166634 |
| FBXO11  | 0.16788626 |
| FBXO15  | 0.34901452 |
| FBXO2   | 1.6424456  |
| FBXO27  | 1.3241308  |
| FBXO28  | 0.48478556 |

|        |            |
|--------|------------|
| FBXO30 | 0.26493835 |
| FBXO32 | 2.2857213  |
| FBXO33 | 0.7877469  |
| FBXO4  | 0.7386794  |
| FBXO42 | 0.7770853  |
| FBXW10 | 1.5781324  |
| FBXW11 | 0.23363304 |
| FBXW17 | 0.9604559  |
| FBXW7  | 0.64042807 |
| FCER1G | 1.4451642  |
| FCER2A | 1.3360276  |
| FCGBP  | 1.5036633  |
| FCGR1  | 0.32749176 |
| FCGR4  | 0.9957142  |
| FCHO1  | 0.7971678  |
| FCHO2  | 1.0043912  |
| FCHSD1 | 0.5343375  |
| FCRLA  | 3.7326226  |
| FCRLB  | 1.3221247  |
| FCRLS  | 2.1430602  |
| FEM1B  | 0.4651289  |
| FEM1C  | 0.45640612 |
| FEN1   | 0.61005354 |
| FENDRR | 1.9794323  |
| FER1L4 | 1.8759613  |
| FERMT3 | 0.43505335 |
| FES    | 0.4051528  |
| FEV    | 1.8895912  |
| FFAR2  | 2.0124774  |
| FFAR4  | 3.8323135  |
| FGD3   | 1.3348274  |
| FGD4   | 1.030623   |
| FGF10  | 3.1837902  |
| FGF11  | 0.7123091  |
| FGF18  | 0.68637276 |
| FGF2   | 0.1971159  |
| FGF6   | 0.5836663  |
| FGF7   | 4.857344   |
| FGFBP1 | 4.884883   |
| FGFR1  | 2.98215    |
| FGFR2  | 0.42812538 |
| FGL2   | 1.2271276  |
| FGR    | 0.92225504 |
| FHAD1  | 1.8003635  |
| FHDC1  | 3.8122025  |

|         |            |
|---------|------------|
| FHL1    | 3.4466448  |
| FHL3    | 0.97366476 |
| FHL5    | 0.9260528  |
| FHOD1   | 0.23450994 |
| FHOD3   | 2.4154606  |
| FIBIN   | 4.966188   |
| FIGF    | 0.7428055  |
| FILIP1  | 1.5017478  |
| FILIP1L | 1.0244265  |
| FIP1L1  | 0.18611765 |
| FIRRE   | 0.5190768  |
| FIS1    | 1.1390424  |
| FJX1    | 2.3537984  |
| FKBP10  | 1.6595569  |
| FKBP14  | 0.3380432  |
| FKBP1B  | 1.6804886  |
| FKBP5   | 0.6305742  |
| FKBP6   | 1.9190459  |
| FKTN    | 1.1594913  |
| FLI1    | 1.6038933  |
| FLII    | 0.31004333 |
| FLNA    | 1.6838555  |
| FLNB    | 0.73902273 |
| FLNC    | 4.7369657  |
| FLOT1   | 0.73463774 |
| FLRT2   | 1.0538774  |
| FLRT3   | 4.6914196  |
| FLT1    | 2.2755814  |
| FLT3    | 1.539484   |
| FMNL1   | 1.4265604  |
| FMNL2   | 2.2069807  |
| FMNL3   | 0.8271961  |
| FMO2    | 3.1447654  |
| FMR1    | 0.84956217 |
| FNBP1   | 0.37618828 |
| FNBP1L  | 1.4006634  |
| FNBP4   | 0.21298313 |
| FNDC1   | 1.2390842  |
| FNDC3B  | 0.9556699  |
| FNDC5   | 1.0496416  |
| FNDC7   | 2.7539787  |
| FOLH1   | 0.6252003  |
| FOS     | 5.324674   |
| FOSB    | 1.7573829  |
| FOSL1   | 4.273935   |

|         |            |
|---------|------------|
| FOSL2   | 3.4324708  |
| FOXA1   | 1.2100458  |
| FOXC1   | 2.4148896  |
| FOXC2   | 2.914168   |
| FOXF1   | 4.208596   |
| FOXF2   | 4.0371914  |
| FOXI2   | 1.3091402  |
| FOXJ1   | 4.9119215  |
| FOXJ3   | 1.4010568  |
| FOXK1   | 0.51242447 |
| FOXL1   | 1.3941748  |
| FOXN2   | 0.50951433 |
| FOXN4   | 2.6228385  |
| FOXO3   | 0.8175416  |
| FOXO6   | 1.7624094  |
| FOXP1   | 1.8607106  |
| FOXP3   | 1.5774806  |
| FOXP4   | 0.22498178 |
| FOXRED2 | 1.8302236  |
| FPR1    | 1.436399   |
| FPR2    | 2.8693657  |
| FPR3    | 2.091085   |
| FPR-RS6 | 1.5855772  |
| FRAS1   | 0.5711398  |
| FRAT2   | 0.77341604 |
| FREM1   | 2.088735   |
| FRG1    | 0.33828974 |
| FRMD4A  | 0.42243958 |
| FRMD5   | 2.8925042  |
| FRMD8   | 0.31178188 |
| FRMPD1  | 1.6842625  |
| FRY     | 2.0317407  |
| FRYL    | 0.79015636 |
| FSCN1   | 3.3452172  |
| FSCN3   | 0.8187821  |
| FSD1L   | 1.7844043  |
| FSIP1   | 1.4034746  |
| FSTL1   | 2.6733332  |
| FSTL3   | 3.5563264  |
| FTSJ3   | 0.91829157 |
| FUBP1   | 1.0207171  |
| FUBP3   | 0.6033273  |
| FUCA2   | 0.63592005 |
| FUNDC2  | 0.7324467  |
| FUS     | 1.1560192  |

|         |            |
|---------|------------|
| FUT1    | 1.0685282  |
| FUT11   | 0.7157669  |
| FUT2    | 2.049193   |
| FUT4    | 3.097041   |
| FUT8    | 0.9180417  |
| FXR1    | 0.13511372 |
| FXD2    | 0.43607855 |
| FXD3    | 2.959165   |
| FXD4    | 4.7741246  |
| FXD5    | 2.1538343  |
| FXD6    | 2.2559762  |
| FYB     | 0.9979601  |
| FYN     | 1.2369471  |
| FZD1    | 1.5102377  |
| FZD2    | 2.5517483  |
| FZD3    | 3.6816666  |
| FZD4    | 1.4300737  |
| FZD5    | 0.8525212  |
| FZD6    | 1.2374716  |
| FZD9    | 2.863486   |
| G2E3    | 1.5054853  |
| G6B     | 0.69867873 |
| G6PD2   | 1.5066257  |
| GAB1    | 1.2292528  |
| GAB2    | 1.2282534  |
| GABBR1  | 0.8423016  |
| GABPB1  | 0.7101774  |
| GABPB2  | 1.807864   |
| GABRE   | 0.84850335 |
| GABRP   | 4.264512   |
| GADD45A | 0.70815134 |
| GADD45B | 3.2173328  |
| GADD45G | 1.7044864  |
| GAL     | 0.8929455  |
| GALC    | 0.76833534 |
| GALNT1  | 1.7152743  |
| GALNT12 | 1.9200239  |
| GALNT15 | 5.389184   |
| GALNT16 | 4.4697046  |
| GALNT18 | 2.324924   |
| GALNT3  | 3.1560335  |
| GALNT6  | 1.8840504  |
| GAN     | 2.1357827  |
| GAP43   | 3.3030102  |
| GAPT    | 0.68684435 |

|         |            |
|---------|------------|
| GAR1    | 0.7691865  |
| GARNL3  | 3.8303914  |
| GARS    | 0.7792573  |
| GAS2L1  | 0.8125739  |
| GAS7    | 2.6577373  |
| GAS8    | 1.4613366  |
| GATA1   | 1.0543215  |
| GATA2   | 4.148496   |
| GATA3   | 1.6877444  |
| GATAD2B | 1.3810344  |
| GATSL2  | 1.3759308  |
| GBAS    | 0.68769646 |
| GBP2    | 1.4681549  |
| GBP3    | 0.5593929  |
| GBP4    | 2.2011776  |
| GBP5    | 3.0563698  |
| GBP7    | 1.1632304  |
| GBP9    | 0.85896206 |
| GCA     | 1.1304791  |
| GCC1    | 0.3427415  |
| GCNT1   | 0.68549633 |
| GCNT2   | 2.2761607  |
| GCSAM   | 1.1484458  |
| GDA     | 0.7235451  |
| GDAP10  | 1.410162   |
| GDE1    | 0.5913539  |
| GDF9    | 0.34510326 |
| GDI1    | 0.25325298 |
| GDNF    | 5.0612373  |
| GDPD1   | 4.4028807  |
| GDPD2   | 8.95665    |
| GDPD5   | 0.20479345 |
| GEM     | 2.5719595  |
| GFI1    | 0.6802659  |
| GFI1B   | 1.3914192  |
| GFPT1   | 0.9650693  |
| GFPT2   | 4.6253614  |
| GFRA4   | 3.6918297  |
| GGPS1   | 1.5736566  |
| GGT1    | 2.3913615  |
| GGT5    | 0.7122326  |
| GGT7    | 0.79368305 |
| GGTA1   | 1.8168647  |
| GHRL    | 1.1215358  |
| GIF     | 1.399873   |

|          |            |
|----------|------------|
| GIMAP1OS | 0.810266   |
| GIMAP3   | 1.1869159  |
| GIMAP4   | 1.1366167  |
| GIMAP5   | 2.780367   |
| GIMAP6   | 1.9739528  |
| GIMAP8   | 1.4008446  |
| GIPC2    | 0.9223685  |
| GIT1     | 1.406424   |
| GJA1     | 3.8170938  |
| GJA5     | 1.6149688  |
| GJB3     | 5.032886   |
| GJB4     | 1.8913212  |
| GJB6     | 4.437649   |
| GJC1     | 2.8498564  |
| GK5      | 1.5156205  |
| GKN3     | 0.48772955 |
| GLB1L2   | 2.6043665  |
| GLCCI1   | 0.75270987 |
| GLG1     | 0.61619425 |
| GLI1     | 0.5549488  |
| GLI3     | 3.000102   |
| GLIPR1   | 2.019586   |
| GLIPR2   | 1.7996273  |
| GLIS3    | 1.964905   |
| GLS      | 2.44177    |
| GLTP     | 0.16578245 |
| GLTSCR1  | 0.89247155 |
| GLYCAM1  | 4.344466   |
| GM10021  | 0.9782336  |
| GM10044  | 0.7447579  |
| GM10046  | 1.5943837  |
| GM10065  | 1.989311   |
| GM10091  | 2.0198154  |
| GM10099  | 1.1053965  |
| GM101    | 1.7644861  |
| GM10183  | 0.6001699  |
| GM10325  | 1.8232875  |
| GM10336  | 0.36040497 |
| GM10354  | 3.5497396  |
| GM10371  | 1.3077295  |
| GM10406  | 2.304168   |
| GM10425  | 1.1216469  |
| GM10427  | 0.73397326 |
| GM10537  | 1.4333827  |
| GM10554  | 2.0753224  |



|         |            |
|---------|------------|
| GM10631 | 0.4047923  |
| GM10634 | 2.343708   |
| GM10638 | 0.992275   |
| GM10648 | 1.3318479  |
| GM10673 | 2.1103137  |
| GM10674 | 0.8451958  |
| GM10693 | 0.8469653  |
| GM10700 | 1.9945896  |
| GM10731 | 0.83944225 |
| GM10781 | 1.3453343  |
| GM10791 | 2.540862   |
| GM10792 | 2.11517    |
| GM10796 | 0.81421447 |
| GM10839 | 4.373183   |
| GM10847 | 0.5103016  |
| GM10851 | 3.7097595  |
| GM10856 | 0.16232681 |
| GM10866 | 0.59610844 |
| GM10872 | 0.3140006  |
| GM1096  | 1.342246   |
| GM11110 | 2.0170186  |
| GM11190 | 1.0467556  |
| GM11346 | 1.0292401  |
| GM11517 | 0.7522106  |
| GM11536 | 2.0088143  |
| GM11627 | 1.4065688  |
| GM11696 | 0.6454592  |
| GM11744 | 1.5199313  |
| GM11938 | 1.188966   |
| GM11974 | 0.81199694 |
| GM12250 | 0.727077   |
| GM12592 | 1.763377   |
| GM12666 | 0.48904562 |
| GM12695 | 0.44059777 |
| GM128   | 0.14789891 |
| GM1305  | 1.0120811  |
| GM13154 | 1.240665   |
| GM13157 | 0.29181337 |
| GM13212 | 0.56656694 |
| GM13272 | 0.8489075  |
| GM13275 | 0.34058762 |
| GM13298 | 1.4725332  |
| GM13304 | 1.7035847  |
| GM13375 | 0.8704288  |
| GM13391 | 0.74050283 |

|         |            |
|---------|------------|
| GM13547 | 1.5049701  |
| GM13570 | 1.7647798  |
| GM13889 | 5.903172   |
| GM13931 | 0.23763514 |
| GM14010 | 1.061286   |
| GM14085 | 1.2173338  |
| GM14420 | 0.4587667  |
| GM14548 | 1.1306477  |
| GM14625 | 0.97879887 |
| GM14635 | 1.6015875  |
| GM14858 | 0.3187468  |
| GM14964 | 1.1143997  |
| GM15056 | 3.4213328  |
| GM15348 | 0.24075031 |
| GM15413 | 0.49220037 |
| GM15455 | 0.65976906 |
| GM15466 | 1.0883145  |
| GM15645 | 1.9194002  |
| GM15998 | 2.709092   |
| GM16340 | 1.0612068  |
| GM16367 | 1.504431   |
| GM16500 | 0.59740686 |
| GM16523 | 0.4788444  |
| GM16524 | 1.0371208  |
| GM166   | 0.5962255  |
| GM1673  | 0.7053137  |
| GM16894 | 2.3547108  |
| GM17019 | 1.709491   |
| GM1715  | 1.6830018  |
| GM17501 | 0.47507167 |
| GM17758 | 0.76527643 |
| GM17778 | 0.74928546 |
| GM17821 | 1.1269469  |
| GM1966  | 2.4449477  |
| GM1987  | 1.9489446  |
| GM2030  | 0.41276908 |
| GM2042  | 1.2966795  |
| GM2044  | 0.5631187  |
| GM20556 | 1.5114381  |
| GM20558 | 7.2332993  |
| GM20611 | 1.5627823  |
| GM20767 | 1.945384   |
| GM21944 | 5.1066694  |
| GM2447  | 0.96134377 |
| GM2511  | 2.712713   |

|        |            |
|--------|------------|
| GM2590 | 1.308526   |
| GM266  | 1.0822561  |
| GM2694 | 1.4323275  |
| GM2696 | 0.697598   |
| GM2701 | 0.48428202 |
| GM3081 | 1.3625853  |
| GM3086 | 0.7511642  |
| GM3099 | 1.3066096  |
| GM3161 | 2.8424125  |
| GM3239 | 2.0999284  |
| GM3252 | 1.5681415  |
| GM3364 | 1.9406562  |
| GM3367 | 0.8173702  |
| GM3383 | 1.4711342  |
| GM3414 | 1.890203   |
| GM3556 | 0.36428332 |
| GM3893 | 1.4930191  |
| GM3916 | 1.5301354  |
| GM4120 | 0.6795306  |
| GM4123 | 0.5988195  |
| GM4349 | 0.7620611  |
| GM4425 | 0.2312994  |
| GM4470 | 1.6876526  |
| GM4610 | 6.421304   |
| GM4759 | 0.9122441  |
| GM4841 | 0.16787004 |
| GM4884 | 0.7677398  |
| GM4907 | 5.3614383  |
| GM4956 | 5.2982993  |
| GM4983 | 1.3197851  |
| GM5067 | 2.6464686  |
| GM5068 | 2.365584   |
| GM5088 | 0.43731117 |
| GM5092 | 0.23589182 |
| GM5106 | 1.6722007  |
| GM5107 | 0.66747546 |
| GM5115 | 0.8250854  |
| GM5150 | 0.3943329  |
| GM5176 | 1.2446241  |
| GM527  | 1.7275717  |
| GM5396 | 1.1235733  |
| GM5416 | 4.8238907  |
| GM5483 | 6.2109313  |
| GM5485 | 0.7739496  |
| GM5486 | 0.33486795 |

|        |            |
|--------|------------|
| GM5532 | 1.3994067  |
| GM5547 | 1.0075119  |
| GM5595 | 0.21737766 |
| GM5602 | 1.4242373  |
| GM5608 | 0.7688036  |
| GM5640 | 0.85413766 |
| GM5643 | 0.4072547  |
| GM5797 | 1.6616151  |
| GM5820 | 1.347976   |
| GM5858 | 1.0165362  |
| GM5862 | 0.7675128  |
| GM5878 | 1.6462493  |
| GM5936 | 1.19449    |
| GM6115 | 1.0805593  |
| GM6116 | 0.28641057 |
| GM614  | 1.1248424  |
| GM6146 | 1.5858383  |
| GM6211 | 0.22045994 |
| GM6252 | 0.34501934 |
| GM6329 | 0.5533395  |
| GM6377 | 3.574789   |
| GM6403 | 4.724528   |
| GM6524 | 0.74520206 |
| GM6557 | 1.5642619  |
| GM6579 | 0.18928003 |
| GM6625 | 0.63919115 |
| GM6756 | 2.1770558  |
| GM684  | 1.5304749  |
| GM6934 | 1.3263173  |
| GM7068 | 1.6854177  |
| GM7111 | 1.1266422  |
| GM7285 | 1.6052532  |
| GM7420 | 1.5657625  |
| GM7609 | 0.43815374 |
| GM7644 | 0.45814872 |
| GM7710 | 1.4901996  |
| GM7931 | 1.1899614  |
| GM7932 | 1.5406487  |
| GM7967 | 1.2828319  |
| GM807  | 1.6935353  |
| GM8096 | 1.8438053  |
| GM8232 | 1.1123819  |
| GM8439 | 1.0620587  |
| GM8556 | 1.6566954  |
| GM867  | 4.3673844  |

|        |            |
|--------|------------|
| GM8675 | 0.6615951  |
| GM8884 | 3.6249156  |
| GM8995 | 2.708291   |
| GM9049 | 0.39988375 |
| GM9099 | 3.194146   |
| GM9257 | 1.4841132  |
| GM94   | 4.354566   |
| GM9456 | 1.855809   |
| GM9465 | 0.80954385 |
| GM9510 | 1.3414443  |
| GM9648 | 0.8846626  |
| GM9693 | 1.4145489  |
| GM9706 | 2.8027601  |
| GM9733 | 0.9348006  |
| GM9758 | 2.010123   |
| GM9798 | 0.8091769  |
| GM9855 | 0.7840061  |
| GM9856 | 0.682703   |
| GM9868 | 1.0951123  |
| GM9889 | 3.0146878  |
| GM9910 | 1.6231902  |
| GM9917 | 1.69156    |
| GM9920 | 0.50945234 |
| GM9926 | 1.6838078  |
| GM9948 | 0.94949627 |
| GM9975 | 1.7194021  |
| GMDS   | 0.15916967 |
| GMEB1  | 0.5804491  |
| GMFG   | 1.4346809  |
| GMIP   | 0.5800681  |
| GMPR   | 2.702506   |
| GNA13  | 1.0937729  |
| GNA14  | 2.4823546  |
| GNAI1  | 1.9498744  |
| GNAI2  | 0.33216572 |
| GNAL   | 2.2870824  |
| GNAO1  | 2.8566258  |
| GNAQ   | 0.7829528  |
| GNB1   | 0.5033541  |
| GNB4   | 0.92256165 |
| GNB5   | 1.4316125  |
| GNG12  | 0.955791   |
| GNG13  | 5.179943   |
| GNG2   | 0.92865276 |
| GNL1   | 1.3154545  |

|            |            |
|------------|------------|
| GNL3       | 0.63027525 |
| GNL3L      | 1.6045637  |
| GNPDA2     | 1.3135619  |
| GNPTAB     | 1.2764864  |
| GOLGA2     | 0.2835307  |
| GOLGA3     | 0.44119024 |
| GOLGB1     | 0.22348118 |
| GOLPH3     | 0.2709446  |
| GOLPH3L    | 1.0681834  |
| GOLT1B     | 1.5289583  |
| GON4L      | 1.279839   |
| GP1BA      | 1.6379514  |
| GP2        | 5.0623064  |
| GP49A      | 3.3029919  |
| GP6        | 0.3757887  |
| GP9        | 0.8382828  |
| GPA33      | 1.0354176  |
| GPANK1     | 0.4168725  |
| GPATCH8    | 0.53446054 |
| GPBP1      | 0.19524622 |
| GPC1       | 0.84576225 |
| GPC3       | 0.83946323 |
| GPCPD1     | 1.5234709  |
| GPHA2      | 0.87960315 |
| GPKOW      | 0.58801794 |
| GPM6A      | 1.0704741  |
| GPM6B      | 4.1676016  |
| GPNMB      | 5.233681   |
| GPR113     | 2.7429876  |
| GPR114     | 1.2198749  |
| GPR116     | 2.938017   |
| GPR126     | 1.5212646  |
| GPR132     | 2.748435   |
| GPR133     | 2.8527637  |
| GPR137B    | 1.5470152  |
| GPR137B-PS | 1.9923553  |
| GPR141     | 3.2410502  |
| GPR146     | 0.41311502 |
| GPR153     | 0.94478846 |
| GPR160     | 0.740365   |
| GPR171     | 3.55764    |
| GPR174     | 1.2332067  |
| GPR179     | 2.7221363  |
| GPR18      | 2.798338   |
| GPR183     | 1.4037104  |

|         |            |
|---------|------------|
| GPR20   | 0.711864   |
| GPR25   | 0.65853095 |
| GPR27   | 0.5711789  |
| GPR31B  | 1.9194934  |
| GPR33   | 1.9762828  |
| GPR35   | 0.9534662  |
| GPR4    | 2.589366   |
| GPR56   | 2.1539636  |
| GPR6    | 0.8554139  |
| GPR65   | 0.55839586 |
| GPR68   | 1.0626674  |
| GPR82   | 1.776211   |
| GPR84   | 4.660898   |
| GPR85   | 2.2379324  |
| GPR87   | 1.6964068  |
| GPR88   | 1.8028016  |
| GPR97   | 0.14103508 |
| GPRASP1 | 0.5717006  |
| GPRC5A  | 3.490933   |
| GPRC5B  | 5.7025967  |
| GPSM1   | 1.0915284  |
| GPSM3   | 0.62744427 |
| GPX2    | 4.9070983  |
| GPX3    | 4.869183   |
| GPX8    | 2.556345   |
| GRAMD1A | 0.709075   |
| GRAMD1B | 1.9322519  |
| GRAMD2  | 3.5425043  |
| GRAMD4  | 0.515996   |
| GRAP    | 1.7446504  |
| GRAP2   | 0.79058003 |
| GRASP   | 1.054636   |
| GREB1   | 0.8856282  |
| GREM1   | 3.1158626  |
| GREM2   | 0.27176046 |
| GRHL1   | 1.3255377  |
| GRHL2   | 3.7259412  |
| GRHL3   | 2.5049887  |
| GRIN2C  | 4.1339617  |
| GRK4    | 0.77311635 |
| GRK5    | 2.5780983  |
| GRP     | 1.8222568  |
| GRRP1   | 4.7703667  |
| GSDMA   | 3.6019561  |
| GSDMC   | 0.9541931  |

|         |            |
|---------|------------|
| GSDMC3  | 0.642534   |
| GSDMC4  | 0.78330255 |
| GSG1    | 1.5161142  |
| GSG2    | 0.57736754 |
| GSK3B   | 0.46723032 |
| GSN     | 3.8144612  |
| GSTO2   | 0.68048096 |
| GTF2F1  | 0.7536192  |
| GTF2F2  | 0.9473605  |
| GTF2H1  | 0.28800774 |
| GTPBP2  | 0.77547693 |
| GTSF1   | 1.809166   |
| GUCA2A  | 0.2573092  |
| GUCA2B  | 0.552078   |
| GUCY1A3 | 0.50548315 |
| GUCY1B3 | 0.8506918  |
| GULP1   | 1.4909699  |
| GVIN1   | 1.7787628  |
| GXYLT1  | 1.1704578  |
| GYG     | 1.3664508  |
| GYS1    | 1.7983017  |
| GZMA    | 1.3248725  |
| GZMB    | 1.760294   |
| GZMC    | 2.4310632  |
| GZMK    | 1.5430565  |
| GZMM    | 0.19088292 |
| H2AFY2  | 0.5472665  |
| H2AFY3  | 1.6076541  |
| H2-EB2  | 3.179714   |
| H2-T24  | 2.0622087  |
| H3F3B   | 0.9403763  |
| H60A    | 1.7503984  |
| H60B    | 2.4951015  |
| HACE1   | 0.59673023 |
| HAP1    | 1.7062721  |
| HAS1    | 7.5788207  |
| HAS2    | 1.9987178  |
| HAUS6   | 0.44212294 |
| HAVCR2  | 3.8132982  |
| HBB-B1  | 0.61222124 |
| HBB-B2  | 0.38966084 |
| HBEGF   | 4.1092362  |
| HBQ1B   | 1.2028224  |
| HCAR2   | 3.396492   |
| HCK     | 1.4818735  |



|           |            |
|-----------|------------|
| HCLS1     | 2.0419626  |
| HCRTR1    | 0.57841516 |
| HCST      | 1.0495701  |
| HDAC1     | 0.25656414 |
| HDAC4     | 1.2246585  |
| HDAC7     | 1.9884233  |
| HDAC9     | 0.5861554  |
| HDC       | 4.4994674  |
| HDDC2     | 0.2916808  |
| HDGFRP3   | 2.429504   |
| HDX       | 1.6555624  |
| HEATR1    | 0.54695606 |
| HEATR3    | 0.3980484  |
| HECA      | 0.15353394 |
| HECW2     | 0.9937115  |
| HEG1      | 2.1483848  |
| HEPACAM   | 1.0499084  |
| HERC1     | 0.33620548 |
| HERC3     | 0.2094531  |
| HERC6     | 1.1726785  |
| HES1      | 0.49357677 |
| HES2      | 0.5818322  |
| HEY1      | 3.4242048  |
| HEY2      | 1.9431527  |
| HEYL      | 2.1170006  |
| HHATL     | 2.3465576  |
| HHIP      | 0.31815863 |
| HIC1      | 0.22654438 |
| HID1      | 3.0263782  |
| HIF1A     | 2.37042    |
| HIF1AN    | 0.66578674 |
| HIF3A     | 3.480293   |
| HIGD1B    | 2.2654138  |
| HILPDA    | 3.1254811  |
| HINFP     | 0.18300414 |
| HIP1      | 0.25160456 |
| HIP1R     | 0.755239   |
| HIPK1     | 1.5068517  |
| HIPK3     | 0.39861488 |
| HIRA      | 1.0491853  |
| HIST1H1A  | 0.450521   |
| HIST1H1B  | 1.3906336  |
| HIST1H1E  | 0.91997147 |
| HIST1H2AB | 1.5264568  |
| HIST1H2AG | 0.24137402 |

|            |            |
|------------|------------|
| HIST1H2BB  | 1.214339   |
| HIST1H2BE  | 3.218068   |
| HIST1H3A   | 1.3231988  |
| HIST1H3C   | 0.7827859  |
| HIST1H3D   | 0.94839907 |
| HIST1H3F   | 1.2812169  |
| HIST1H3G   | 1.9076207  |
| HIST1H3I   | 0.769336   |
| HIST1H4C   | 1.2913556  |
| HIST1H4D   | 2.5597868  |
| HIST1H4J   | 1.6424232  |
| HIST1H4K   | 2.1805534  |
| HIST1H4M   | 0.8454957  |
| HIST2H2BB  | 0.34581184 |
| HIST2H3B   | 1.0717297  |
| HIST2H4    | 1.895421   |
| HIST4H4    | 2.055563   |
| HIVEP1     | 1.038064   |
| HIVEP2     | 3.0158124  |
| HK2        | 2.0814304  |
| HKDC1      | 5.4514356  |
| HLX        | 1.4042239  |
| HMGA1      | 0.6919193  |
| HMGA2-PS1  | 0.5394993  |
| HMGB1      | 0.5461979  |
| HMGB1-RS17 | 0.6340251  |
| HMGB2      | 1.8003082  |
| HMGB4OS    | 0.65778637 |
| HMGCLL1    | 0.92497396 |
| HMGN3      | 2.082934   |
| HMGXB4     | 0.19836092 |
| HMHA1      | 1.0773478  |
| HMOX1      | 2.1216912  |
| HMX3       | 1.3542979  |
| HNRNPA1    | 0.78149366 |
| HNRNPA3    | 0.88509655 |
| HNRNPD     | 0.55710936 |
| HNRNPDL    | 0.9435024  |
| HNRNPH1    | 0.86552715 |
| HNRNPH2    | 0.29447126 |
| HNRNPL     | 0.9522028  |
| HNRNPUL1   | 1.0133281  |
| HOMER3     | 0.8972025  |
| HOPX       | 2.067799   |
| HOXA3      | 1.7193711  |

|          |            |
|----------|------------|
| HOXA4    | 1.4483182  |
| HOXA5    | 4.2371664  |
| HOXA7    | 0.729789   |
| HOXB2    | 1.2844405  |
| HOXB3    | 1.0070741  |
| HOXB4    | 1.3059764  |
| HOXB5    | 1.2021298  |
| HOXB5OS  | 1.9962277  |
| HOXB6    | 3.6336572  |
| HOXB7    | 0.8092468  |
| HOXD8    | 1.0746939  |
| HPCAL1   | 0.60887575 |
| HPGDS    | 1.9357374  |
| HRC      | 3.7291498  |
| HRCT1    | 3.1674304  |
| HRNR     | 3.4276547  |
| HS3ST1   | 0.89141345 |
| HS6ST2   | 1.4503355  |
| HSD17B14 | 1.0515702  |
| HSDL1    | 0.57266235 |
| HSH2D    | 2.4420357  |
| HSPA12B  | 1.5782423  |
| HSPA2    | 1.5885916  |
| HSPA4L   | 1.0030127  |
| HSPB1    | 6.246183   |
| HSPB2    | 0.88557625 |
| HSPB6    | 0.3842163  |
| HSPB7    | 2.8144083  |
| HTATSF1  | 1.499609   |
| HTR2B    | 4.4110765  |
| HTR7     | 4.8206177  |
| HTRA1    | 2.2732491  |
| HTRA3    | 0.25559282 |
| HTT      | 2.0477247  |
| HUS1     | 0.52335405 |
| HUWE1    | 0.21311855 |
| HVCN1    | 1.3496199  |
| HYDIN    | 2.8037112  |
| HYOU1    | 0.34786224 |
| ICA1     | 1.9701381  |
| ICAM1    | 3.3403993  |
| ICAM2    | 1.327426   |
| ICAM5    | 1.8685026  |
| ICOS     | 0.6199961  |
| ICOSL    | 2.3906593  |

|           |            |
|-----------|------------|
| ID1       | 0.96322155 |
| ID3       | 0.545599   |
| IDO1      | 0.89231443 |
| IDS       | 1.6067758  |
| IER2      | 1.2036185  |
| IER3      | 5.231737   |
| IER5      | 1.6366782  |
| IER5L     | 3.1136127  |
| IFI202B   | 1.7217946  |
| IFI204    | 1.1162572  |
| IFI27L2A  | 0.68051624 |
| IFI47     | 0.8051219  |
| IFIH1     | 0.2952175  |
| IFIT1     | 1.8293304  |
| IFIT2     | 1.2967954  |
| IFIT3     | 1.3492942  |
| IFITM1    | 2.8743567  |
| IFITM10   | 0.34425783 |
| IFITM5    | 2.8649728  |
| IFITM6    | 4.3384113  |
| IFNA1     | 0.16362357 |
| IFNA14    | 0.5930052  |
| IFNA5     | 0.87249565 |
| IFNAB     | 0.97302294 |
| IFNG      | 4.575471   |
| IFNGR1    | 0.77543116 |
| IFNLR1    | 3.0288448  |
| IFRD1     | 2.0623827  |
| IFT122    | 0.8446703  |
| IFT140    | 0.3758464  |
| IFT43     | 1.4960871  |
| IFT57     | 2.6274505  |
| IFT80     | 0.43305302 |
| IFT81     | 1.3757553  |
| IFT88     | 0.6094675  |
| IGF1R     | 2.8095655  |
| IGF2BP2   | 1.040834   |
| IGFBP3    | 1.4336133  |
| IGFBP5    | 2.6094751  |
| IGFBP6    | 5.1705093  |
| IGFLR1    | 0.49654913 |
| IGHV14-2  | 2.8346715  |
| IGH-VJ558 | 3.290441   |
| IGJ       | 3.1736054  |
| IGKV4-53  | 0.19722366 |

|          |            |
|----------|------------|
| IGKV6-20 | 4.5988116  |
| IGLV1    | 1.5066428  |
| IGSF1    | 1.3561685  |
| IGSF23   | 0.5071213  |
| IGSF3    | 1.8971281  |
| IGSF6    | 0.75402546 |
| IK       | 0.19546747 |
| IKBKE    | 0.77524424 |
| IKZF1    | 1.4038396  |
| IKZF2    | 0.944361   |
| IKZF4    | 3.5686002  |
| IKZF5    | 1.6993012  |
| IL10     | 3.2818475  |
| IL10RA   | 0.26600552 |
| IL10RB   | 1.1920409  |
| IL11     | 5.247109   |
| IL12B    | 2.0384638  |
| IL12RB2  | 0.6264956  |
| IL16     | 0.98986053 |
| IL17A    | 4.654379   |
| IL17D    | 1.1243224  |
| IL17F    | 3.6789186  |
| IL17RA   | 2.0093846  |
| IL17RD   | 2.1577473  |
| IL17RE   | 3.2344165  |
| IL18R1   | 3.4209142  |
| IL18RAP  | 3.772426   |
| IL19     | 0.7631035  |
| IL1A     | 1.5567865  |
| IL1B     | 3.7900834  |
| IL1F6    | 5.8234925  |
| IL1F8    | 1.0825574  |
| IL1F9    | 6.3062825  |
| IL1R2    | 7.9986944  |
| IL1RL1   | 3.3952246  |
| IL1RL2   | 0.96919036 |
| IL1RN    | 3.037136   |
| IL20RB   | 1.5779648  |
| IL21R    | 0.97877145 |
| IL22     | 0.78087616 |
| IL22RA2  | 2.5328484  |
| IL23A    | 2.3482237  |
| IL23R    | 0.9036491  |
| IL2RA    | 4.819016   |
| IL2RB    | 1.0919466  |

|         |            |
|---------|------------|
| IL2RG   | 1.2892513  |
| IL33    | 2.6481495  |
| IL3RA   | 0.44489384 |
| IL4I1   | 3.6551342  |
| IL4RA   | 2.5053735  |
| IL6     | 9.970649   |
| IL6ST   | 0.54155016 |
| IL7R    | 5.643655   |
| ILD1R1  | 3.8014665  |
| ILF2    | 0.8809352  |
| IMPACT  | 0.21614933 |
| IMPDH1  | 0.8075237  |
| INADL   | 1.1465921  |
| INCENP  | 0.4602766  |
| ING1    | 0.4990778  |
| ING3    | 1.3985691  |
| ING5    | 0.5163703  |
| INHA    | 2.3208475  |
| INHBB   | 6.695317   |
| INIP    | 0.36547232 |
| INO80   | 0.5103755  |
| INO80B  | 1.3367572  |
| INO80D  | 2.2113895  |
| INO80E  | 0.6027813  |
| INPP4A  | 1.3958721  |
| INPP4B  | 0.55357695 |
| INPP5B  | 0.16314316 |
| INPP5D  | 1.6885242  |
| INPP5J  | 0.8444557  |
| INPP5K  | 0.40121222 |
| INSL6   | 0.6388979  |
| INTS12  | 0.8912802  |
| IP6K3   | 2.418774   |
| IPO13   | 0.6310015  |
| IPO7    | 0.5094485  |
| IQCA    | 4.028528   |
| IQCB1   | 1.2108271  |
| IQCF1   | 1.1687572  |
| IQCK    | 0.9626341  |
| IQGAP1  | 2.5500941  |
| IRAK3   | 2.5157876  |
| IRF1    | 0.71927166 |
| IRF2BP2 | 0.55359983 |
| IRF2BPL | 0.31828976 |
| IRF4    | 2.3242917  |

|          |            |
|----------|------------|
| IRF7     | 0.1748352  |
| IRG1     | 3.7573962  |
| IRS2     | 1.7258911  |
| IRX1     | 8.916662   |
| IRX2     | 4.0495486  |
| IRX3     | 7.1910133  |
| IRX5     | 3.4755316  |
| ISG15    | 2.1820116  |
| ISG20    | 2.9167676  |
| ISLR2    | 3.2908137  |
| ISM1     | 4.9650345  |
| ITGA1    | 0.9506445  |
| ITGA11   | 1.4552181  |
| ITGA2    | 0.6890826  |
| ITGA2B   | 1.1161757  |
| ITGA3    | 2.4683657  |
| ITGA4    | 1.3683     |
| ITGA6    | 2.045701   |
| ITGA7    | 1.3154354  |
| ITGAE    | 1.6503606  |
| ITGAM    | 1.5239978  |
| ITGAV    | 0.6529298  |
| ITGAX    | 2.6492462  |
| ITGB1    | 0.5748148  |
| ITGB1BP2 | 3.0825844  |
| ITGB2    | 0.9821358  |
| ITGB2L   | 3.9498715  |
| ITGB3    | 3.0878954  |
| ITGB4    | 2.5462008  |
| ITGB6    | 3.7605484  |
| ITGB8    | 1.323009   |
| ITGBL1   | 1.3514528  |
| ITK      | 1.4300728  |
| ITLN1    | 6.1969485  |
| ITLNB    | 1.7003953  |
| ITM2A    | 1.6524863  |
| ITPKB    | 2.5307722  |
| ITPKC    | 1.2235074  |
| ITPR3    | 1.8189054  |
| ITPRIP   | 4.022718   |
| ITPRIPL2 | 1.7985969  |
| ITSN2    | 0.7138295  |
| IWS1     | 0.68726087 |
| JADE2    | 1.041326   |
| JAG1     | 2.0302835  |

|         |            |
|---------|------------|
| JAG2    | 2.1347225  |
| JAK2    | 1.3125324  |
| JAK3    | 0.29992437 |
| JAKMIP1 | 1.976969   |
| JAM2    | 0.5825348  |
| JAM3    | 1.382802   |
| JDP2    | 2.4829412  |
| JMJD1C  | 1.3619657  |
| JMY     | 0.6829295  |
| JSRP1   | 1.5923214  |
| JUN     | 3.9256206  |
| JUNB    | 2.8101377  |
| JUND    | 0.58947563 |
| JUP     | 1.1045372  |
| KANK3   | 1.3043952  |
| KANK4   | 0.7290771  |
| KANSL1  | 1.075258   |
| KANSL3  | 0.4235325  |
| KAT5    | 0.5765314  |
| KAT6A   | 0.4357605  |
| KAT6B   | 0.8704667  |
| KAT7    | 0.28941393 |
| KATNA1  | 0.49103403 |
| KATNAL1 | 0.7907777  |
| KATNAL2 | 0.74543476 |
| KATNB1  | 0.758132   |
| KATNBL1 | 0.58290625 |
| KAZN    | 3.131782   |
| KBTBD11 | 3.1895852  |
| KBTBD8  | 0.34937453 |
| KCNA3   | 1.8920965  |
| KCNC1   | 0.4117241  |
| KCNC2   | 1.0879543  |
| KCND3   | 0.6161244  |
| KCNE2   | 6.3410373  |
| KCNE3   | 2.7791643  |
| KCNE4   | 5.2553954  |
| KCNH3   | 1.7252421  |
| KCNIP3  | 1.0856118  |
| KCNJ13  | 3.315791   |
| KCNJ15  | 4.3448586  |
| KCNJ2   | 1.7893934  |
| KCNJ5   | 1.923852   |
| KCNJ8   | 2.2396054  |
| KCNK1   | 5.2995777  |



|           |            |
|-----------|------------|
| KCNK12    | 1.0133762  |
| KCNK13    | 1.2584004  |
| KCNK3     | 1.4128969  |
| KCNK4     | 0.19653058 |
| KCNK6     | 0.51947594 |
| KCNMB1    | 2.0924678  |
| KCNMB2    | 1.2087343  |
| KCNMB4    | 3.376683   |
| KCNN3     | 1.8865314  |
| KCNN4     | 0.3547125  |
| KCNQ1     | 1.5337424  |
| KCNRG     | 4.7660065  |
| KCNS3     | 2.8877983  |
| KCNT1     | 0.4415462  |
| KCTD1     | 3.768394   |
| KCTD10    | 2.689231   |
| KCTD11    | 2.0020556  |
| KCTD12    | 0.32600832 |
| KCTD12B   | 1.3808718  |
| KCTD19    | 0.5140557  |
| KCTD5     | 1.7712169  |
| KCTD9     | 0.59517336 |
| KDELC2    | 0.22687364 |
| KDELR3    | 1.4922009  |
| KDM1A     | 0.3881936  |
| KDM3A     | 1.8639517  |
| KDM5A     | 1.4279475  |
| KDM5B     | 0.6748071  |
| KDM6A     | 0.860322   |
| KDM6B     | 1.962575   |
| KDM7A     | 1.2543669  |
| KHDC3     | 2.2178082  |
| KHDRBS1   | 0.26792812 |
| KIDINS220 | 0.42245197 |
| KIF1A     | 4.830691   |
| KIF21B    | 0.74723244 |
| KIF27     | 2.129265   |
| KIF2A     | 0.24191785 |
| KIF3A     | 1.0329933  |
| KIF3B     | 1.105715   |
| KIF5A     | 0.64220214 |
| KIF5B     | 0.56639814 |
| KIF5C     | 1.4444685  |
| KIF6      | 1.3756092  |
| KIF9      | 1.0993762  |

|         |            |
|---------|------------|
| KIFAP3  | 0.47479582 |
| KIRREL  | 1.9700837  |
| KISS1R  | 1.0149136  |
| KIT     | 1.4887748  |
| KITL    | 5.24218    |
| KIZ     | 0.37843037 |
| KLC1    | 0.557899   |
| KLC2    | 0.50530386 |
| KLC3    | 2.0564795  |
| KLF11   | 0.93518806 |
| KLF13   | 0.62172556 |
| KLF2    | 1.6643157  |
| KLF3    | 1.1654062  |
| KLF4    | 3.3048878  |
| KLF5    | 5.934026   |
| KLF6    | 2.9372482  |
| KLF7    | 2.3609185  |
| KLF8    | 0.98985386 |
| KLF9    | 1.1081214  |
| KLHDC1  | 1.523993   |
| KLHDC4  | 0.6040125  |
| KLHDC9  | 2.1934648  |
| KLHL1   | 1.1078568  |
| KLHL11  | 0.39012718 |
| KLHL15  | 0.5645783  |
| KLHL2   | 0.35172462 |
| KLHL21  | 0.21339798 |
| KLHL24  | 1.4250131  |
| KLHL28  | 0.9631009  |
| KLHL29  | 1.9228427  |
| KLHL32  | 0.7876351  |
| KLHL38  | 2.1583042  |
| KLHL40  | 1.5123043  |
| KLHL41  | 2.6040418  |
| KLHL5   | 0.91203594 |
| KLHL6   | 3.1334805  |
| KLK10   | 0.8745291  |
| KLK11   | 5.4602404  |
| KLK13   | 1.7471004  |
| KLK14   | 2.365542   |
| KLK1B26 | 0.5556209  |
| KLK1B27 | 1.4735949  |
| KLK4    | 1.536977   |
| KLK8    | 1.4593315  |
| KLK9    | 4.13498    |

|        |            |
|--------|------------|
| KLRA1  | 0.22176623 |
| KLRA15 | 1.9682055  |
| KLRA16 | 0.41233206 |
| KLRA2  | 2.2863026  |
| KLRA22 | 0.90702677 |
| KLRA23 | 0.73200274 |
| KLRA4  | 1.9037199  |
| KLRA7  | 1.1680212  |
| KLRA8  | 2.2663393  |
| KLRA9  | 0.9162178  |
| KLRB1A | 1.4250989  |
| KLRB1B | 0.8441405  |
| KLRB1C | 0.340966   |
| KLRB1F | 1.45821    |
| KLRC1  | 0.78076315 |
| KLRG1  | 0.44470572 |
| KLRG2  | 0.3690033  |
| KLRI2  | 1.644774   |
| KMT2A  | 2.6467566  |
| KMT2D  | 0.35726166 |
| KMT2E  | 1.0001869  |
| KNDC1  | 2.0699918  |
| KPNA4  | 0.5605316  |
| KPRP   | 3.1387813  |
| KRAS   | 0.45829868 |
| KRI1   | 1.1773777  |
| KRIT1  | 0.13612795 |
| KRR1   | 0.20586395 |
| KRT13  | 4.4069085  |
| KRT14  | 3.8993258  |
| KRT15  | 2.7126632  |
| KRT16  | 2.108397   |
| KRT17  | 3.8537023  |
| KRT19  | 3.2584538  |
| KRT23  | 0.22585344 |
| KRT4   | 2.3619256  |
| KRT42  | 1.8978481  |
| KRT5   | 4.9773192  |
| KRT6A  | 2.5060802  |
| KRT6B  | 5.6755347  |
| KRT7   | 5.3762717  |
| KRT78  | 3.8809748  |
| KRT79  | 4.196703   |
| KRT80  | 0.8604169  |
| KRT81  | 1.2748871  |

|            |            |
|------------|------------|
| KRT83      | 0.82666326 |
| KRT85      | 0.16398191 |
| KRT86      | 1.6120293  |
| KRTAP10-10 | 0.72674656 |
| KRTAP11-1  | 0.69887304 |
| KRTAP19-4  | 1.6921272  |
| KRTAP20-2  | 0.36263275 |
| KRTAP28-13 | 0.4998865  |
| KRTAP31-1  | 0.9972453  |
| KRTAP5-1   | 0.35860038 |
| KRTAP5-3   | 0.16836262 |
| KRTCAP3    | 1.9885592  |
| KRTDAP     | 7.6025057  |
| KSR1       | 1.2868888  |
| KTN1       | 3.4596996  |
| L1CAM      | 1.1483574  |
| L3MBTL3    | 1.1142764  |
| LAD1       | 1.5497296  |
| LAIR1      | 0.26972723 |
| LAMA2      | 0.6962223  |
| LAMA3      | 2.2859654  |
| LAMA4      | 2.3137937  |
| LAMA5      | 2.9092116  |
| LAMB1      | 1.2940497  |
| LAMB2      | 1.4057393  |
| LAMB3      | 1.9636173  |
| LAMC1      | 1.3958383  |
| LAMC2      | 7.762702   |
| LAMC3      | 0.75221515 |
| LAMP3      | 2.2633448  |
| LANCL2     | 0.25499344 |
| LAPTM4A    | 0.31534052 |
| LAPTM5     | 1.7756042  |
| LARGE      | 0.24211311 |
| LARP6      | 3.2374728  |
| LARP7      | 0.57476425 |
| LAT2       | 1.8650618  |
| LATS1      | 0.6891327  |
| LATS2      | 2.1295757  |
| LAX1       | 0.48196816 |
| LAYN       | 1.2695525  |
| LBR        | 1.0166416  |
| LBX1       | 1.0504959  |
| LCA5       | 1.4890311  |
| LCA5L      | 0.98932123 |

|         |            |
|---------|------------|
| LCE1A1  | 6.1379256  |
| LCE1A2  | 1.3926897  |
| LCE1B   | 4.6982155  |
| LCE1C   | 5.020638   |
| LCE1D   | 6.144812   |
| LCE1E   | 5.2203717  |
| LCE1F   | 4.95566    |
| LCE1G   | 2.8042672  |
| LCE1H   | 2.3901463  |
| LCE1I   | 5.494845   |
| LCE1J   | 0.8820529  |
| LCE1K   | 4.6570024  |
| LCE1L   | 2.6926699  |
| LCE1M   | 1.0883846  |
| LCE3A   | 8.005016   |
| LCE3B   | 7.859097   |
| LCE3C   | 7.2002835  |
| LCE3D   | 5.062594   |
| LCE3E   | 5.1897826  |
| LCE3F   | 3.1668773  |
| LCK     | 0.50845146 |
| LCN2    | 2.0486598  |
| LCN6    | 0.7481668  |
| LCOR    | 1.310175   |
| LCORL   | 0.38861585 |
| LCP1    | 1.2648077  |
| LCP2    | 0.49703765 |
| LDB2    | 2.603901   |
| LDB3    | 2.5548885  |
| LDHB    | 1.5360174  |
| LDLRAD1 | 2.36374    |
| LDLRAD4 | 0.97670555 |
| LDOC1L  | 0.14756584 |
| LEF1    | 3.4992251  |
| LEFTY2  | 2.2145455  |
| LEKR1   | 1.5626543  |
| LEMD3   | 0.5208745  |
| LENG8   | 0.42968702 |
| LEPREL4 | 0.9312153  |
| LGALS1  | 0.5859351  |
| LGALS3  | 1.304491   |
| LGALS7  | 2.4259772  |
| LGI2    | 2.8387938  |
| LGI3    | 5.3719482  |
| LGI4    | 0.6442895  |

|             |            |
|-------------|------------|
| LHB         | 1.553438   |
| LHFP        | 1.5751996  |
| LHX1OS      | 0.8491111  |
| LHX4        | 0.51687336 |
| LIF         | 1.1804101  |
| LILRA6      | 1.5478063  |
| LILRB4      | 2.3060231  |
| LIMA1       | 0.53284025 |
| LIMCH1      | 5.739079   |
| LIME1       | 0.409297   |
| LIMK1       | 0.35792542 |
| LIMK2       | 0.4546504  |
| LIMS1       | 0.98956347 |
| LIN52       | 0.312891   |
| LIN7C       | 0.3890872  |
| LINGO4      | 1.9973431  |
| LIPF        | 2.659809   |
| LIPG        | 4.171123   |
| LIPH        | 5.217876   |
| LIPO1       | 1.2866664  |
| LITAF       | 0.58360624 |
| LIX1L       | 2.4901543  |
| LMAN1L      | 1.1149554  |
| LMCD1       | 2.2080846  |
| LMLN        | 2.1022282  |
| LMNB1       | 1.3526177  |
| LMO1        | 3.0912786  |
| LMO4        | 1.1642079  |
| LMO7        | 3.117228   |
| LMTK3       | 0.8547404  |
| LNPEP       | 1.6058946  |
| LNX1        | 0.5250881  |
| LOC10004170 | 1.1862497  |
| LOC10105580 | 0.7470751  |
| LOC10105620 | 1.6525898  |
| LOC10105620 | 1.8761578  |
| LOC10105620 | 1.0892739  |
| LOC10263260 | 0.52225304 |
| LOC10263320 | 0.8290348  |
| LOC10263330 | 0.98481154 |
| LOC10263360 | 2.567357   |
| LOC10263360 | 0.5269871  |
| LOC10263370 | 3.1584995  |
| LOC10263380 | 0.4440987  |
| LOC10263440 | 0.621222   |

|            |            |
|------------|------------|
| LOC1026380 | 2.8528073  |
| LOC1026385 | 0.32975483 |
| LOC1026391 | 1.7358747  |
| LOC1026395 | 2.283958   |
| LOC1026416 | 1.253881   |
| LOC1026416 | 0.8459964  |
| LOC1026416 | 0.61408734 |
| LOC1026423 | 2.0049994  |
| LOC1026423 | 1.5481663  |
| LOC1026424 | 0.40545845 |
| LOC1026424 | 1.629791   |
| LOC1026425 | 0.9672663  |
| LOC1026426 | 0.63806105 |
| LOC1026427 | 0.9537051  |
| LOC1026427 | 0.21173    |
| LOC1026428 | 0.7960968  |
| LOC1026430 | 0.6652131  |
| LONRF3     | 0.471519   |
| LOR        | 6.0487165  |
| LOX        | 7.715526   |
| LOXL1      | 3.469226   |
| LOXL4      | 0.389791   |
| LPAR1      | 3.6387627  |
| LPAR3      | 3.6523204  |
| LPCAT1     | 2.8417935  |
| LPCAT2     | 0.47139072 |
| LPCAT2B    | 0.76794624 |
| LPXN       | 1.4633594  |
| LRCH1      | 1.6880355  |
| LRFN4      | 4.012564   |
| LRGUK      | 2.7628992  |
| LRIF1      | 0.29576063 |
| LRP12      | 0.4620142  |
| LRP2       | 4.349502   |
| LRR1       | 1.647224   |
| LRR10      | 3.5600536  |
| LRR10B     | 3.5660014  |
| LRR16A     | 2.219091   |
| LRR2       | 2.218173   |
| LRR23      | 5.394993   |
| LRR25      | 1.6213474  |
| LRR26      | 6.869556   |
| LRR27      | 0.3213365  |
| LRR32      | 1.8562598  |
| LRR34      | 2.86948    |

|         |            |
|---------|------------|
| LRR36   | 5.477016   |
| LRR38   | 1.1146545  |
| LRR4    | 0.26604223 |
| LRR43   | 3.0868387  |
| LRR49   | 2.822702   |
| LRR4B   | 2.7860303  |
| LRR51   | 0.76175976 |
| LRR71   | 0.57698345 |
| LRR73   | 0.7998946  |
| LRR75A  | 1.015317   |
| LRR75B  | 1.360975   |
| LRR8A   | 1.1509261  |
| LRR8B   | 3.9497533  |
| LRR8C   | 1.9765544  |
| LRR8E   | 1.710372   |
| LRRFIP1 | 0.91953945 |
| LRRFIP2 | 0.24200153 |
| LRRIQ1  | 0.87649703 |
| LRRK1   | 0.5319071  |
| LRRK2   | 4.066656   |
| LRRN4CL | 3.1558988  |
| LRTM2   | 4.246707   |
| LSM12   | 0.2663517  |
| LSM8    | 1.0044804  |
| LSP1    | 1.7362571  |
| LTB     | 0.5080843  |
| LTB4R1  | 2.91679    |
| LTBP1   | 2.4482026  |
| LTBP2   | 2.119833   |
| LTBP3   | 1.9996781  |
| LTBP4   | 1.3876338  |
| LTC4S   | 0.8623791  |
| LTF     | 4.723978   |
| LTV1    | 0.4611001  |
| LUC7L3  | 0.9124274  |
| LURAP1  | 2.1125755  |
| LUZP1   | 0.6006398  |
| LXN     | 1.2105169  |
| LY6A    | 2.1110244  |
| LY6C1   | 2.0834537  |
| LY6F    | 2.231257   |
| LY6G5B  | 1.7859266  |
| LY6G6C  | 3.4810848  |
| LY6G6D  | 0.93728375 |
| LY6G6E  | 0.30941677 |



|           |            |
|-----------|------------|
| LY6H      | 1.2815042  |
| LY6I      | 1.67414    |
| LY6K      | 1.8761792  |
| LY75      | 1.4495606  |
| LYN       | 0.65457535 |
| LYNX1     | 1.1728473  |
| LYPD2     | 5.0305624  |
| LYPD3     | 5.1299343  |
| LYPD5     | 2.9711266  |
| LYPD6B    | 4.8910227  |
| LYSMD2    | 1.7974591  |
| LYST      | 0.6372273  |
| LYVE1     | 5.5131235  |
| LYZ1      | 1.8930225  |
| LYZ2      | 2.2324562  |
| LZTS1     | 1.3699691  |
| LZTS2     | 0.69394493 |
| LZTS3     | 0.52826786 |
| M1AP      | 2.7316005  |
| MAATS1    | 2.0468206  |
| MAB21L3   | 3.1795483  |
| MACC1     | 2.697443   |
| MACF1     | 1.258565   |
| MADCAM1   | 2.069503   |
| MAFF      | 4.047655   |
| MAFK      | 1.7100258  |
| MAG       | 0.8002918  |
| MAGEA7-PS | 0.99852514 |
| MAGEF1    | 0.79290485 |
| MAGI3     | 1.1380157  |
| MAGOH     | 0.3086896  |
| MAGOHB    | 1.866746   |
| MAK       | 1.0540245  |
| MAK16     | 0.59055996 |
| MAL       | 2.0482235  |
| MAL2      | 0.5479245  |
| MALAT1    | 2.8903694  |
| MALL      | 4.5910745  |
| MALT1     | 2.6805763  |
| MAML1     | 0.53778696 |
| MAML3     | 1.977354   |
| MAMSTR    | 2.8507452  |
| MAN1C1    | 0.57624865 |
| MAP10     | 1.4711859  |
| MAP1A     | 1.2171082  |

|          |            |
|----------|------------|
| MAP1B    | 3.223871   |
| MAP1S    | 0.24115467 |
| MAP2     | 0.9356251  |
| MAP2K1   | 0.50737953 |
| MAP3K1   | 0.66468716 |
| MAP3K14  | 0.8995886  |
| MAP3K15  | 0.74430466 |
| MAP3K3   | 0.88606405 |
| MAP3K6   | 5.0145845  |
| MAP3K7   | 0.28575993 |
| MAP3K8   | 2.512198   |
| MAP3K9   | 2.6236064  |
| MAP4     | 1.5576868  |
| MAP4K1   | 1.508429   |
| MAP4K4   | 1.939044   |
| MAP6     | 3.6005697  |
| MAPK10   | 2.7744236  |
| MAPK11   | 0.7786231  |
| MAPK12   | 0.49197865 |
| MAPK13   | 4.022091   |
| MAPK6    | 0.79683256 |
| MAPK7    | 1.1563973  |
| MAPKAPK3 | 2.081365   |
| MAPKBP1  | 1.5773585  |
| MAPRE1   | 0.896503   |
| MAPRE2   | 0.655777   |
| MAPT     | 2.2219925  |
| MARCKS   | 1.8419809  |
| MARCKSL1 | 1.4132767  |
| MARF1    | 0.35340476 |
| MARK1    | 2.173461   |
| MARK2    | 0.7936077  |
| MARK4    | 0.44892788 |
| MARVELD3 | 2.1282802  |
| MAST2    | 0.37914371 |
| MAST4    | 1.9325833  |
| MAT2A    | 0.43461275 |
| MATN4    | 2.4468827  |
| MB       | 8.392814   |
| MB21D1   | 0.82229185 |
| MBD1     | 1.3425202  |
| MBD2     | 1.2131481  |
| MBD4     | 0.355592   |
| MBD5     | 1.0132806  |
| MBIP     | 1.1547966  |

|        |            |
|--------|------------|
| MBNL2  | 1.1285458  |
| MBNL3  | 2.105342   |
| MBOAT1 | 3.425228   |
| MBOAT2 | 0.7775507  |
| MBP    | 3.5127378  |
| MC5R   | 1.3316598  |
| MCEMP1 | 4.075736   |
| MCF2L  | 2.959248   |
| MCL1   | 0.93355083 |
| MCM3   | 0.50289917 |
| MCM6   | 0.5586519  |
| MCMBP  | 0.26369238 |
| MCOLN2 | 3.326748   |
| MCOLN3 | 0.74075675 |
| MCPT4  | 2.5720048  |
| MCRS1  | 0.55657816 |
| MCTP1  | 2.7508154  |
| MCTP2  | 0.78467846 |
| MDFI   | 2.451675   |
| MDFIC  | 0.84595394 |
| MDGA1  | 0.6247697  |
| MDH1B  | 4.307129   |
| MDM2   | 0.17502022 |
| MDM4   | 1.9399025  |
| MDN1   | 0.86545014 |
| ME2    | 0.43153286 |
| ME3    | 4.20266    |
| MECP2  | 1.1378226  |
| MED12  | 0.20059013 |
| MED13  | 0.76770425 |
| MED13L | 2.7667847  |
| MED24  | 0.45391512 |
| MED26  | 0.2841072  |
| MED27  | 0.2341857  |
| MED31  | 0.7610202  |
| MEF2A  | 0.8802881  |
| MEF2B  | 0.42892003 |
| MEF2C  | 1.0044878  |
| MEF2D  | 0.5123725  |
| MEFV   | 2.315154   |
| MEGF10 | 0.64354444 |
| MEGF6  | 1.5995858  |
| MEGF8  | 0.25767994 |
| MEIG1  | 5.5326366  |
| MEOX1  | 3.2815523  |

|           |            |
|-----------|------------|
| MEOX2     | 4.018817   |
| MESDC1    | 1.0248334  |
| MESP1     | 1.7310023  |
| METRNL    | 0.6723809  |
| METTLL14  | 0.6477659  |
| METTLL21C | 2.1129172  |
| METTLL24  | 0.55560255 |
| METTLL25  | 0.16234303 |
| METTLL6   | 0.39806366 |
| MEX3B     | 0.48949695 |
| MEX3C     | 0.65162516 |
| MEX3D     | 0.7195158  |
| MFAP1A    | 0.96546316 |
| MFAP1B    | 1.3186913  |
| MFAP2     | 2.183249   |
| MFAP3L    | 1.0923321  |
| MFAP4     | 3.395668   |
| MFAP5     | 5.4547195  |
| MFGE8     | 0.8590684  |
| MFNG      | 1.7624493  |
| MFSD4     | 2.7105043  |
| MFSD6     | 1.1851797  |
| MFSD6L    | 3.836154   |
| MFSD7A    | 1.1067321  |
| MFSD7B    | 1.3929448  |
| MGA       | 0.6605096  |
| MGARP     | 2.7050164  |
| MGAT3     | 3.6078897  |
| MGAT4A    | 2.557509   |
| MGAT5     | 0.53680134 |
| MGEA5     | 1.7421827  |
| MGP       | 3.4573336  |
| MIA       | 1.1653643  |
| MICAL1    | 2.3959613  |
| MICAL2    | 0.6652386  |
| MICALL1   | 0.5972986  |
| MICU3     | 1.5924842  |
| MID2      | 0.8768766  |
| MIDN      | 0.7310438  |
| MIER1     | 0.8968735  |
| MILL2     | 1.752568   |
| MIPOL1    | 0.93408537 |
| MIR17HG   | 0.6760998  |
| MIR22HG   | 1.3901424  |
| MISP      | 1.774971   |

|        |            |
|--------|------------|
| MITD1  | 0.41073465 |
| MITF   | 0.6196871  |
| MKI67  | 0.2657094  |
| MKL1   | 1.1139493  |
| MKRN1  | 0.22687292 |
| MLANA  | 3.9443     |
| MLC1   | 7.9406877  |
| MLF1   | 3.7052374  |
| MLIP   | 1.1904261  |
| MLKL   | 0.69699097 |
| MLLT10 | 0.9498415  |
| MLLT11 | 1.0157351  |
| MLLT4  | 3.8104253  |
| MLLT6  | 1.148459   |
| MLPH   | 2.823029   |
| MLXIP  | 1.5140834  |
| MMP11  | 0.69358206 |
| MMP12  | 2.3194137  |
| MMP13  | 3.261489   |
| MMP14  | 0.4488573  |
| MMP17  | 0.6082382  |
| MMP2   | 3.345994   |
| MMP23  | 0.2268095  |
| MMP25  | 5.010382   |
| MMP3   | 7.348541   |
| MMP7   | 0.36163688 |
| MMP8   | 5.436223   |
| MMP9   | 4.664946   |
| MMRN1  | 2.8394852  |
| MNDA   | 1.9916654  |
| MNS1   | 3.9105759  |
| MNT    | 1.0036469  |
| MOAP1  | 0.15405321 |
| MOB1A  | 0.5384126  |
| MOB1B  | 1.6145678  |
| MOB3A  | 1.7767391  |
| MOB4   | 0.8814697  |
| MOK    | 2.915523   |
| MON1B  | 0.67866945 |
| MON2   | 0.7563429  |
| MORC1  | 3.57994    |
| MORC3  | 0.5206804  |
| MORN3  | 1.236212   |
| MORN4  | 1.9846401  |
| MORN5  | 4.558945   |

|           |            |
|-----------|------------|
| MOSPD1    | 0.6519122  |
| MOXD1     | 1.8658006  |
| MPHOSPH10 | 0.76393247 |
| MPHOSPH6  | 1.3367596  |
| MPP3      | 0.53027105 |
| MPP5      | 1.6061287  |
| MPP7      | 1.6917701  |
| MPRIP     | 0.59978724 |
| MPZL1     | 1.042315   |
| MRAP2     | 3.6147447  |
| MRE11A    | 0.50280905 |
| MRGPRA2A  | 4.8319683  |
| MRGPRA2B  | 4.8577766  |
| MRGPRA6   | 4.1009912  |
| MROH1     | 1.0414948  |
| MRPL20    | 0.9469242  |
| MRPL3     | 0.29572153 |
| MRPS6     | 0.7615714  |
| MRVI1     | 0.60224557 |
| MS4A1     | 2.2895923  |
| MS4A14    | 0.9583247  |
| MS4A15    | 0.5142708  |
| MS4A3     | 1.1312108  |
| MS4A4A    | 5.3973947  |
| MS4A4B    | 1.386363   |
| MS4A4D    | 2.7662034  |
| MS4A6B    | 3.241646   |
| MS4A6C    | 2.210641   |
| MS4A6D    | 2.5914493  |
| MS4A7     | 1.9628353  |
| MS4A8A    | 1.330895   |
| MSANTD1   | 1.0492775  |
| MSANTD3   | 1.8364768  |
| MSI2      | 0.8796859  |
| MSL2      | 1.2758007  |
| MSL3L2    | 0.2897215  |
| MSLN      | 2.390955   |
| MSN       | 2.0879922  |
| MSR1      | 0.20555592 |
| MSRB3     | 0.7885313  |
| MST1R     | 2.2744646  |
| MSX1      | 0.71328735 |
| MSX2      | 0.6651659  |
| MT4       | 2.5522425  |
| MTA2      | 1.0888476  |

|         |            |
|---------|------------|
| MTAP7D3 | 2.4509861  |
| MTBP    | 0.91923904 |
| MTCL1   | 5.222236   |
| MTDH    | 0.7806449  |
| MTF2    | 0.3372693  |
| MTHFD1L | 1.425056   |
| MTHFD2  | 3.6204991  |
| MTHFD2L | 0.4490435  |
| MTIF2   | 1.2005191  |
| MTMR12  | 0.8522682  |
| MTMR3   | 0.8599882  |
| MTRR    | 0.73780584 |
| MTURN   | 1.3066812  |
| MTUS2   | 1.1027365  |
| MUC1    | 5.9573727  |
| MUC13   | 4.7969627  |
| MUC20   | 4.6204195  |
| MUC4    | 6.5283513  |
| MUC5AC  | 1.3080428  |
| MUC5B   | 9.865908   |
| MUM1L1  | 2.5170221  |
| MURC    | 1.779084   |
| MUSTN1  | 1.6015491  |
| MVB12B  | 1.6254301  |
| MVP     | 0.8980131  |
| MX1     | 1.8466363  |
| MX2     | 0.5556092  |
| MXD1    | 3.7566347  |
| MXRA7   | 0.9523928  |
| MXRA8   | 0.34806252 |
| MYADM   | 1.0283365  |
| MYADML2 | 0.5627792  |
| MYB     | 2.397955   |
| MYBL2   | 1.262867   |
| MYBPC1  | 4.907195   |
| MYBPC2  | 5.736462   |
| MYBPC3  | 4.00275    |
| MYBPH   | 1.0880415  |
| MYBPHL  | 4.575226   |
| MYC     | 2.0321965  |
| MYCBP2  | 0.42151737 |
| MYCBPAP | 2.750482   |
| MYD88   | 1.457026   |
| MYEF2   | 1.5521922  |
| MYF6    | 4.5680943  |

|        |            |
|--------|------------|
| MYH1   | 8.433739   |
| MYH11  | 2.810505   |
| MYH14  | 2.8378043  |
| MYH2   | 2.2012827  |
| MYH3   | 1.5653617  |
| MYH4   | 2.2491972  |
| MYH6   | 7.1083665  |
| MYH7   | 5.377422   |
| MYH7B  | 1.5241926  |
| MYH8   | 7.4964685  |
| MYH9   | 1.0785208  |
| MYL1   | 6.559048   |
| MYL12A | 0.6509919  |
| MYL3   | 7.522196   |
| MYL4   | 5.514036   |
| MYL7   | 6.3049207  |
| MYL9   | 1.6760693  |
| MYLK2  | 4.245859   |
| MYLK3  | 0.9593458  |
| MYO10  | 1.3146958  |
| MYO18B | 0.8810997  |
| MYO1C  | 1.4463859  |
| MYO1D  | 3.0098667  |
| MYO1F  | 0.6958499  |
| MYO1G  | 1.5464005  |
| MYO1H  | 1.9839232  |
| MYO5A  | 2.8783255  |
| MYO5C  | 3.5899315  |
| MYO9A  | 0.30587745 |
| MYOCD  | 1.8382196  |
| MYOF   | 0.4126897  |
| MYOM1  | 4.7461634  |
| MYOM2  | 5.5947857  |
| MYOM3  | 3.6329656  |
| MYOT   | 3.3685703  |
| MYOZ1  | 4.2565866  |
| MYOZ2  | 6.009225   |
| MYRF   | 0.9926641  |
| MYRIP  | 4.8143373  |
| MYSM1  | 0.3536477  |
| MYZAP  | 1.8335238  |
| MZB1   | 1.5074649  |
| MZT1   | 0.7648668  |
| N28178 | 1.9925418  |
| N4BP1  | 1.8636923  |



|          |            |
|----------|------------|
| N4BP2    | 0.5154009  |
| N4BP2L2  | 1.0263829  |
| N4BP3    | 1.7992792  |
| NAA15    | 0.2572646  |
| NAA25    | 0.6573782  |
| NAAA     | 1.2261372  |
| NAB1     | 0.30880308 |
| NAF1     | 0.7544036  |
| NAIP1    | 0.24072242 |
| NAIP6    | 0.5756221  |
| NAMPT    | 0.5924158  |
| NAP1L1   | 0.6810703  |
| NAPEPLD  | 0.6816225  |
| NAPSA    | 4.2252593  |
| NAT14    | 0.70611835 |
| NAT8L    | 0.9677305  |
| NAV1     | 1.1048908  |
| NAV3     | 0.46875477 |
| NBEA     | 2.9512339  |
| NBEAL1   | 0.81401634 |
| NBL1     | 4.5206165  |
| NBN      | 0.9919417  |
| NCAPG2   | 0.23446083 |
| NCAPH    | 1.0119658  |
| NCCRP1   | 2.702973   |
| NCDN     | 0.2933569  |
| NCF1     | 1.8025889  |
| NCF2     | 1.8268604  |
| NCF4     | 1.9593868  |
| NCK2     | 0.7011013  |
| NCKAP1L  | 0.693398   |
| NCKAP5   | 4.3995414  |
| NCL      | 1.1535993  |
| NCOA6    | 0.4953704  |
| NCOA7    | 3.067037   |
| NCOR2    | 0.32226706 |
| NCR1     | 0.389179   |
| NCS1     | 1.6011109  |
| NCSTN    | 0.49711752 |
| ND6      | 1.5145569  |
| NDE1     | 0.28775263 |
| NDEL1    | 0.67400694 |
| NDRG1    | 1.9691801  |
| NDRG4    | 3.5886216  |
| NDUFA4L2 | 0.35314178 |

|          |            |
|----------|------------|
| NEAT1    | 0.9640374  |
| NEB      | 3.0410833  |
| NEBL     | 3.3031108  |
| NEDD9    | 2.738853   |
| NEIL1    | 0.35726452 |
| NEK11    | 2.1589866  |
| NEK5     | 4.4541306  |
| NEK7     | 0.913723   |
| NEK8     | 0.21934032 |
| NEMF     | 0.4168191  |
| NEO1     | 0.51161957 |
| NES      | 3.0166912  |
| NET1     | 0.29827738 |
| NEURL1A  | 3.0006561  |
| NEURL3   | 1.9878278  |
| NEUROG1  | 0.81342006 |
| NEXN     | 2.2639456  |
| NFASC    | 2.6087308  |
| NFAT5    | 1.9839082  |
| NFATC1   | 1.2170839  |
| NFATC2IP | 0.5884495  |
| NFATC4   | 3.4337916  |
| NFE2     | 1.2437153  |
| NFE2L1   | 0.7544856  |
| NFE2L2   | 0.26925325 |
| NFE2L3   | 1.1187165  |
| NFIL3    | 0.84005547 |
| NFKB1    | 1.6841941  |
| NFKB2    | 1.5333934  |
| NFKBIA   | 2.9988866  |
| NFKBID   | 2.443705   |
| NFKBIE   | 1.3137097  |
| NFKBIZ   | 2.119977   |
| NFRKB    | 0.478446   |
| NFYA     | 0.4485879  |
| NGDN     | 0.14067984 |
| NGFRAP1  | 2.0958095  |
| NGP      | 3.5478158  |
| NHLH1    | 1.5580807  |
| NHLRC4   | 2.6288724  |
| NHSL2    | 1.9930925  |
| NID1     | 0.7398224  |
| NIN      | 1.3709493  |
| NINJ2    | 0.71096253 |
| NIPA1    | 0.29296923 |

|        |            |
|--------|------------|
| NIPAL2 | 3.4826891  |
| NIPAL3 | 0.57095957 |
| NIPBL  | 1.0790925  |
| NKAIN1 | 0.28472757 |
| NKD1   | 2.415708   |
| NKG7   | 0.16600847 |
| NKTR   | 1.1526694  |
| NKX2-1 | 6.8048463  |
| NKX2-5 | 1.6737835  |
| NKX6-1 | 0.9481337  |
| NLGN2  | 1.8338976  |
| NLGN3  | 0.5977442  |
| NLK    | 0.14549065 |
| NLRC3  | 0.5572815  |
| NLRC4  | 1.1881046  |
| NLRC5  | 0.7753253  |
| NLRP10 | 0.6517341  |
| NLRP3  | 3.6826568  |
| NMB    | 0.92876005 |
| NME5   | 4.3436875  |
| NME9   | 0.36432457 |
| NMT2   | 0.58660316 |
| NMUR2  | 3.984168   |
| NNAT   | 2.4915032  |
| NOC3L  | 0.38489628 |
| NOD1   | 1.8676729  |
| NOD2   | 3.350358   |
| NOG    | 1.736268   |
| NOL10  | 0.76855946 |
| NOL3   | 0.4756546  |
| NOLC1  | 0.52898836 |
| NOM1   | 0.44324398 |
| NOP14  | 1.1315837  |
| NOP56  | 0.53846025 |
| NOP58  | 0.5773277  |
| NOS2   | 3.9243927  |
| NOS3   | 1.4072819  |
| NOTCH1 | 1.1010866  |
| NOTCH2 | 0.68213844 |
| NOTCH3 | 1.1988492  |
| NOTCH4 | 1.8910198  |
| NOV    | 3.1269524  |
| NOVA2  | 0.5955405  |
| NOX4   | 4.8420086  |
| NOXA1  | 0.582746   |

|        |            |
|--------|------------|
| NOXO1  | 1.7056046  |
| NPAS2  | 0.35172915 |
| NPC2   | 1.4872303  |
| NPCD   | 0.24578881 |
| NPDC1  | 1.6671634  |
| NPEPPS | 0.97282934 |
| NPHP1  | 1.5997894  |
| NPHP4  | 1.9735138  |
| NPHS2  | 0.78079057 |
| NPM1   | 0.7611971  |
| NPM2   | 1.3087807  |
| NPNT   | 4.429858   |
| NPPA   | 8.985999   |
| NPPB   | 1.9629972  |
| NPR2   | 0.56367874 |
| NPR3   | 3.0338364  |
| NPW    | 5.6632905  |
| NPY    | 3.1355886  |
| NPY1R  | 1.0822527  |
| NR2C2  | 1.3276734  |
| NR4A1  | 4.7932887  |
| NR4A2  | 3.3974133  |
| NR4A3  | 1.0576825  |
| NRADD  | 0.23477507 |
| NRARP  | 2.5119684  |
| NRAS   | 1.1408324  |
| NRCAM  | 5.0544844  |
| NRD1   | 1.3782096  |
| NRF1   | 0.33074427 |
| NRG1   | 0.4078722  |
| NRG3OS | 0.5071044  |
| NRG4   | 0.38327026 |
| NRGN   | 0.716485   |
| NRIP1  | 1.566999   |
| NRIP3  | 3.052351   |
| NRP2   | 0.8380923  |
| NRSN1  | 0.7309792  |
| NSD1   | 0.3479185  |
| NSF    | 1.6775985  |
| NSG1   | 3.2825556  |
| NSG2   | 1.8491874  |
| NSMCE2 | 0.30964327 |
| NT5C3B | 0.38978577 |
| NTF5   | 0.36728215 |
| NTN1   | 0.95731306 |

|        |            |
|--------|------------|
| NTN4   | 0.2644043  |
| NTN5   | 1.0702808  |
| NTNG2  | 4.066696   |
| NTRK2  | 2.9319053  |
| NTS    | 1.3371501  |
| NTSR2  | 1.4025414  |
| NUAK1  | 0.5500963  |
| NUAK2  | 1.1301794  |
| NUB1   | 0.26378155 |
| NUCB2  | 2.716682   |
| NUDT10 | 1.0528696  |
| NUDT11 | 1.3440392  |
| NUDT17 | 0.6839018  |
| NUFIP2 | 0.41561556 |
| NUMA1  | 0.46100903 |
| NUMBL  | 2.2706075  |
| NUP107 | 0.47766733 |
| NUP153 | 0.7967262  |
| NUP160 | 0.41238594 |
| NUP188 | 0.68890667 |
| NUP205 | 0.47820616 |
| NUP62  | 0.9013066  |
| NUP93  | 0.8001466  |
| NUP98  | 1.9222841  |
| NUPR1  | 5.1910534  |
| NUPR1L | 0.25307393 |
| NUS1   | 0.56691265 |
| NVL    | 0.3981502  |
| NWD2   | 2.2605114  |
| NXF1   | 0.43110895 |
| NXF2   | 1.5117254  |
| NXNL2  | 1.5975859  |
| NXPE3  | 1.3702064  |
| NXPH3  | 2.2275667  |
| NYX    | 2.5669312  |
| OAS2   | 0.6683512  |
| OAS3   | 1.407125   |
| OASL2  | 2.0733194  |
| OAZ2   | 1.1053252  |
| OBFC1  | 1.1990733  |
| OBSCN  | 0.8405483  |
| OBSL1  | 3.70688    |
| OCM    | 0.75189877 |
| ODC1   | 1.524611   |
| ODF2   | 1.254559   |

|             |            |
|-------------|------------|
| ODF2L       | 0.25798273 |
| OFD1        | 0.9165993  |
| OGN         | 2.7012239  |
| OIT1        | 0.9580064  |
| OLFM1       | 1.7187252  |
| OLFM4       | 2.7395635  |
| OLFML2B     | 2.8101735  |
| OLFR103     | 0.22166824 |
| OLFR1043    | 0.7456479  |
| OLFR1131    | 0.84493876 |
| OLFR1134    | 0.7207875  |
| OLFR1180    | 1.4095402  |
| OLFR1243    | 0.3100903  |
| OLFR1252    | 0.9748235  |
| OLFR1368    | 0.88958406 |
| OLFR1372-PS | 1.329473   |
| OLFR1384    | 1.3091371  |
| OLFR1396    | 1.618931   |
| OLFR1402    | 0.74279046 |
| OLFR1443    | 0.40668654 |
| OLFR15      | 0.8486736  |
| OLFR1505    | 1.1032739  |
| OLFR213     | 1.2066576  |
| OLFR224     | 1.1694331  |
| OLFR259     | 0.6990063  |
| OLFR391-PS  | 0.41342282 |
| OLFR414     | 1.2614694  |
| OLFR470     | 1.253439   |
| OLFR482     | 1.457634   |
| OLFR513     | 1.2576177  |
| OLFR524     | 0.47057414 |
| OLFR544     | 1.1209202  |
| OLFR56      | 1.3995197  |
| OLFR609     | 0.23475742 |
| OLFR635     | 1.5473797  |
| OLFR700     | 1.7433147  |
| OLFR738     | 0.5931697  |
| OLR1        | 3.697684   |
| OOSP1       | 2.4905455  |
| OPHN1       | 0.38816476 |
| OPN3        | 0.9730737  |
| ORAI2       | 1.9145851  |
| ORC4        | 1.7638547  |
| OSBPL10     | 2.2887912  |
| OSBPL3      | 1.8433614  |

|          |            |
|----------|------------|
| OSBPL5   | 2.1144552  |
| OSBPL6   | 1.5824692  |
| OSBPL7   | 0.5669732  |
| OSBPL9   | 2.1607904  |
| OSCP1    | 3.4273996  |
| OSGIN2   | 1.7413902  |
| OSM      | 4.328584   |
| OSMR     | 3.8426318  |
| OSR1     | 5.165198   |
| OSTF1    | 0.9088669  |
| OTOP2    | 1.8914244  |
| OTOP3    | 1.9337432  |
| OTUD1    | 0.8211293  |
| OTUD4    | 0.33885002 |
| OTUD5    | 0.447093   |
| OTUD7B   | 0.8439958  |
| OVGP1    | 2.0846741  |
| OXCT1    | 1.3025327  |
| OXR1     | 0.27486563 |
| P2RX5    | 3.7208357  |
| P2RY10   | 3.188993   |
| P2RY14   | 0.48071718 |
| P2RY2    | 2.7182636  |
| P2RY6    | 0.49605274 |
| P4HA1    | 0.38252258 |
| P4HA2    | 2.6429892  |
| P4HTM    | 0.9437585  |
| PA2G4    | 0.4787016  |
| PABPC1   | 0.5078416  |
| PABPC1L  | 2.708666   |
| PABPN1   | 0.43200493 |
| PACRG    | 3.1503847  |
| PACS1    | 1.5932574  |
| PACS2    | 0.43639755 |
| PADI1    | 0.35820985 |
| PADI4    | 0.6486697  |
| PAFAH1B1 | 0.2434268  |
| PAG1     | 2.6573775  |
| PAK2     | 0.61969376 |
| PAK6     | 1.2712414  |
| PAK7     | 0.15738535 |
| PAM      | 2.215785   |
| PAN3     | 0.90826845 |
| PANCT2   | 0.7163875  |
| PANK2    | 0.29380274 |

|         |            |
|---------|------------|
| PANK3   | 0.56144404 |
| PANX1   | 0.1969347  |
| PAPL    | 0.31184483 |
| PAPOLG  | 0.39925694 |
| PAPPA   | 5.3638053  |
| PAPPA2  | 3.4078777  |
| PAQR5   | 1.3552096  |
| PAQR6   | 1.1372106  |
| PAQR8   | 2.614602   |
| PARD6B  | 4.0465126  |
| PARD6G  | 2.5708346  |
| PARL    | 0.22859621 |
| PARM1   | 5.7541633  |
| PARP10  | 0.4720168  |
| PARP14  | 0.7633681  |
| PARP2   | 0.16701937 |
| PARP4   | 1.7532535  |
| PARP8   | 2.4193048  |
| PARVB   | 1.53285    |
| PATL1   | 0.19205332 |
| PATZ1   | 0.8451185  |
| PAWR    | 1.5088892  |
| PAX5    | 0.4356246  |
| PAX9    | 1.0966918  |
| PAXBP1  | 0.20551443 |
| PAXIP1  | 0.9640782  |
| PBRM1   | 0.6231103  |
| PBX1    | 0.9793763  |
| PBX3    | 1.5433116  |
| PBXIP1  | 1.6504273  |
| PCBP3   | 2.3971958  |
| PCDH17  | 2.6685858  |
| PCDH18  | 0.79152775 |
| PCDH19  | 4.4143176  |
| PCDHB10 | 2.0729592  |
| PCDHB14 | 2.0323594  |
| PCDHB16 | 2.27096    |
| PCDHB17 | 1.5874476  |
| PCDHB18 | 2.1092358  |
| PCDHB20 | 2.6968315  |
| PCDHB21 | 2.9470568  |
| PCDHB22 | 1.9387419  |
| PCDHB3  | 1.0962875  |
| PCDHB6  | 2.11526    |
| PCDHB7  | 2.3130841  |



|          |            |
|----------|------------|
| PCDHGA1  | 2.1416602  |
| PCDHGA10 | 2.9060748  |
| PCDHGA9  | 2.049271   |
| PCF11    | 1.5443804  |
| PCGF3    | 1.1997933  |
| PCGF5    | 1.0695682  |
| PCIF1    | 1.000195   |
| PCK2     | 0.5455899  |
| PCM1     | 0.8563609  |
| PCNA     | 0.2960806  |
| PCNT     | 1.8279285  |
| PCNXL2   | 1.4012189  |
| PCNXL4   | 0.5197499  |
| PCOLCE2  | 0.34004736 |
| PCP4     | 0.7101679  |
| PCSK2    | 0.9477298  |
| PCSK5    | 2.0422635  |
| PCYT1A   | 0.21110821 |
| PDCD1    | 2.3510494  |
| PDCD11   | 0.26200747 |
| PDCD1LG2 | 1.3529508  |
| PDCD6IP  | 0.34478998 |
| PDCL3    | 1.6499853  |
| PDE1B    | 1.2331839  |
| PDE3A    | 2.3892004  |
| PDE4B    | 4.211302   |
| PDE4D    | 1.9015667  |
| PDE5A    | 0.6240711  |
| PDE7A    | 1.7865047  |
| PDE7B    | 2.4192898  |
| PDE8B    | 1.3863993  |
| PDGFA    | 1.9476962  |
| PDGFB    | 1.9077516  |
| PDGFRA   | 3.98453    |
| PDGFRB   | 0.36302376 |
| PDGFRL   | 2.0067163  |
| PDIA2    | 1.2683835  |
| PDK3     | 2.0508876  |
| PDK4     | 2.3167973  |
| PDLIM2   | 2.7759843  |
| PDLIM3   | 2.4378052  |
| PDLIM5   | 1.0497074  |
| PDLIM7   | 2.3101182  |
| PDP1     | 0.81862307 |
| PDPN     | 5.412135   |

|         |            |
|---------|------------|
| PDPR    | 0.18282104 |
| PDS5A   | 0.25260115 |
| PDZD2   | 2.3898304  |
| PDZD4   | 2.3614104  |
| PDZD8   | 0.74191666 |
| PEAK1   | 0.17712355 |
| PEAR1   | 0.63883543 |
| PECAM1  | 1.8081269  |
| PEG13   | 1.4658561  |
| PEG3    | 1.3237884  |
| PEG3OS  | 1.0413113  |
| PELI1   | 0.51265    |
| PENK    | 1.7936578  |
| PER1    | 1.4225421  |
| PERM1   | 0.7218168  |
| PES1    | 0.21989632 |
| PF4     | 2.13722    |
| PFDN2   | 0.17846394 |
| PFKFB2  | 0.6598878  |
| PFKFB3  | 4.219854   |
| PFKFB4  | 2.1368241  |
| PFKP    | 1.2310667  |
| PGAM2   | 4.12155    |
| PGAP3   | 0.25191355 |
| PGBD5   | 0.81068444 |
| PGF     | 1.2085481  |
| PGGT1B  | 0.9262366  |
| PGLYRP1 | 7.14597    |
| PGM1    | 1.0457726  |
| PGS1    | 2.1354008  |
| PHACTR1 | 3.154193   |
| PHACTR2 | 1.0972309  |
| PHC1    | 1.2933276  |
| PHC2    | 0.9231868  |
| PHC3    | 0.51558495 |
| PHF11A  | 1.3521929  |
| PHF11B  | 1.331728   |
| PHF11D  | 1.4113479  |
| PHF13   | 0.65051174 |
| PHF2    | 0.21631622 |
| PHF20   | 0.75385094 |
| PHF20L1 | 0.8937416  |
| PHF21B  | 0.5044668  |
| PHF23   | 0.31096506 |
| PHF8    | 0.9601536  |

|          |            |
|----------|------------|
| PHGDH    | 1.6988153  |
| PHIP     | 0.73178196 |
| PHKA1    | 1.2976608  |
| PHKG1    | 0.87150526 |
| PHLDA1   | 0.45865345 |
| PHLDB1   | 0.8531213  |
| PHLPP2   | 0.48183107 |
| PHOSPHO1 | 0.46796322 |
| PHOX2A   | 1.6801538  |
| PHTF1    | 0.27690315 |
| PHXR4    | 2.0849564  |
| PI15     | 4.1737127  |
| PI16     | 7.5875044  |
| PI4KA    | 0.22324848 |
| PIANP    | 0.16814089 |
| PIAS1    | 0.24144077 |
| PIAS3    | 0.37434602 |
| PIBF1    | 0.5584738  |
| PICALM   | 0.9397526  |
| PIEZO1   | 1.5818315  |
| PIFO     | 1.9607365  |
| PIGM     | 0.7745075  |
| PIH1D2   | 1.7493777  |
| PIK3AP1  | 1.1570759  |
| PIK3C2A  | 1.1445584  |
| PIK3CD   | 0.48172235 |
| PIK3CG   | 2.110302   |
| PIK3IP1  | 3.0046477  |
| PIK3R3   | 1.2640414  |
| PIK3R5   | 2.1143775  |
| PIK3R6   | 1.5229454  |
| PILRA    | 1.2103457  |
| PILRB2   | 0.31333637 |
| PIM1     | 2.7136235  |
| PIM2     | 0.2732389  |
| PIM3     | 1.0634937  |
| PIP4K2A  | 1.3427906  |
| PIP4K2C  | 0.33566284 |
| PIP5K1A  | 1.6230102  |
| PIP5K1C  | 0.75268984 |
| PIRA11   | 0.92350626 |
| PIRA2    | 1.1941514  |
| PIRA6    | 0.8562932  |
| PIRA7    | 0.8951416  |
| PITPNA   | 0.4303832  |

|         |            |
|---------|------------|
| PITPNM3 | 3.051601   |
| PITX1   | 4.4256206  |
| PIWIL4  | 2.6839173  |
| PJA2    | 0.66337204 |
| PKD1L3  | 1.3412728  |
| PKD2    | 1.8772464  |
| PKIA    | 0.6222365  |
| PKIB    | 0.30065417 |
| PKM     | 2.3642416  |
| PKN2    | 0.5005865  |
| PKNOX2  | 3.2869422  |
| PKP1    | 2.2277117  |
| PLA2G1B | 3.367246   |
| PLA2G2C | 0.9338832  |
| PLA2G2E | 0.7519386  |
| PLA2G4A | 0.64863205 |
| PLA2G4D | 2.237095   |
| PLA2G4F | 1.554033   |
| PLA2G7  | 1.4877057  |
| PLAC8   | 1.4399171  |
| PLAC9A  | 0.80231524 |
| PLAGL1  | 1.490181   |
| PLAGL2  | 1.3266816  |
| PLAT    | 6.8966217  |
| PLAU    | 2.147454   |
| PLAUR   | 5.3702707  |
| PLB1    | 0.60851645 |
| PLCB2   | 0.69713664 |
| PLCB3   | 0.46345425 |
| PLCB4   | 2.9854612  |
| PLCD1   | 2.0267096  |
| PLCD3   | 1.6022549  |
| PLCG2   | 1.0147638  |
| PLCH1   | 3.18655    |
| PLCH2   | 1.8501904  |
| PLCL1   | 1.6669934  |
| PLCXD3  | 0.8761549  |
| PLD2    | 0.39085293 |
| PLD3    | 0.4358673  |
| PLEK    | 2.644607   |
| PLEKHA1 | 2.335608   |
| PLEKHA2 | 0.853199   |
| PLEKHA4 | 2.2543535  |
| PLEKHB1 | 0.8027296  |
| PLEKHB2 | 1.1509895  |

|          |            |
|----------|------------|
| PLEKHD1  | 2.9160457  |
| PLEKHF2  | 1.0495358  |
| PLEKHG2  | 0.6566415  |
| PLEKHG4  | 2.939907   |
| PLEKHH1  | 2.498273   |
| PLEKHM1  | 0.38266993 |
| PLEKHM2  | 0.87693787 |
| PLEKHM3  | 0.8673868  |
| PLEKHO1  | 0.40539694 |
| PLEKHO2  | 1.144867   |
| PLEKHS1  | 3.7853932  |
| PLET1    | 4.7859936  |
| PLGRKT   | 0.40766096 |
| PLIN1    | 2.4351087  |
| PLIN4    | 3.120161   |
| PLK2     | 0.9400983  |
| PLN      | 2.6414845  |
| PLOD2    | 3.3783255  |
| PLOD3    | 0.20653296 |
| PLP2     | 4.2357416  |
| PLSCR1   | 1.3293071  |
| PLSCR3   | 0.31855106 |
| PLVAP    | 0.81197023 |
| PLXDC2   | 2.9234028  |
| PLXNA2   | 0.92957544 |
| PLXNA4   | 1.7692485  |
| PMAIP1   | 3.1769748  |
| PMEPA1   | 3.2353158  |
| PML      | 0.59098625 |
| PMP22    | 3.1704469  |
| PNCK     | 0.8117893  |
| PNLIPRP1 | 0.7295785  |
| PNN      | 0.44650745 |
| PNPLA2   | 0.43745804 |
| POC1A    | 0.59101534 |
| POC1B    | 0.7461648  |
| POC5     | 1.275167   |
| PODXL    | 2.4243984  |
| POF1B    | 2.0265331  |
| POGK     | 2.4387476  |
| POLD3    | 0.46538877 |
| POLE2    | 0.46072507 |
| POLH     | 1.9079366  |
| POLK     | 0.5189979  |
| POLM     | 0.46010303 |

|          |            |
|----------|------------|
| POLR3D   | 0.1348238  |
| POLR3E   | 1.2952266  |
| POLR3GL  | 0.28789282 |
| PON2     | 0.48397827 |
| POP4     | 0.7650566  |
| POPDC2   | 3.1125836  |
| POPDC3   | 3.8019493  |
| PORCN    | 2.827474   |
| POSTN    | 0.9829836  |
| POT1B    | 0.8601978  |
| POU2AF1  | 2.935678   |
| POU2F2   | 0.83620644 |
| POU5F2   | 0.38905907 |
| PPAP2A   | 0.575212   |
| PPARD    | 0.43107128 |
| PPBP     | 0.46439886 |
| PPFIA1   | 0.23352432 |
| PPFIBP1  | 0.27105093 |
| PPIC     | 2.1515465  |
| PPIG     | 0.54348373 |
| PPIL4    | 0.1943965  |
| PPIL6    | 2.4190621  |
| PPIP5K1  | 1.6357026  |
| PPL      | 2.0541267  |
| PPM1D    | 0.7462797  |
| PPM1F    | 0.35048962 |
| PPM1H    | 0.87709284 |
| PPM1J    | 2.670391   |
| PPM1M    | 0.59776974 |
| PPP1R12A | 1.4888911  |
| PPP1R12B | 0.51875496 |
| PPP1R13B | 0.4572444  |
| PPP1R14A | 0.5757823  |
| PPP1R14D | 4.967951   |
| PPP1R15A | 2.035325   |
| PPP1R16B | 0.99667    |
| PPP1R18  | 1.7404289  |
| PPP1R2   | 1.5749836  |
| PPP1R26  | 2.7398276  |
| PPP1R27  | 1.1502602  |
| PPP1R32  | 4.0082164  |
| PPP1R3A  | 3.3167048  |
| PPP1R3D  | 1.9001479  |
| PPP1R8   | 0.55405045 |
| PPP1R9A  | 1.1548538  |

|          |            |
|----------|------------|
| PPP1R9B  | 1.3885942  |
| PPP2CB   | 0.6208973  |
| PPP2R2A  | 0.81175995 |
| PPP2R5B  | 0.4674859  |
| PPP3CC   | 0.86762524 |
| PPP4R1   | 0.7082534  |
| PPP4R2   | 0.94005203 |
| PPP6R3   | 0.6431422  |
| PPRC1    | 0.34568024 |
| PPT1     | 0.6375499  |
| PQLC3    | 2.2511783  |
| PRAF2    | 0.48622465 |
| PRAM1    | 2.147643   |
| PRAMEF8  | 0.3645649  |
| PRCC     | 0.17614794 |
| PRDM1    | 2.5201826  |
| PRDM16   | 3.4571803  |
| PRDM2    | 0.96731496 |
| PRDM4    | 0.7302046  |
| PRDM5    | 2.9911203  |
| PRDM6    | 2.9233804  |
| PRDM8    | 1.844619   |
| PREX1    | 0.2893648  |
| PREX2    | 0.98978734 |
| PRF1     | 1.3226485  |
| PRICKLE2 | 0.90919924 |
| PRKAB2   | 0.2856145  |
| PRKAR1B  | 3.6815352  |
| PRKAR2B  | 2.6249948  |
| PRKCA    | 0.4711795  |
| PRKCB    | 0.74161196 |
| PRKCD    | 1.2187867  |
| PRKCDBP  | 2.6782722  |
| PRKCE    | 1.3662512  |
| PRKCH    | 2.586831   |
| PRKCI    | 0.29452658 |
| PRKCQ    | 0.7634604  |
| PRKD1    | 3.4183323  |
| PRKD2    | 0.7731581  |
| PRKG1    | 4.032466   |
| PRKG2    | 1.7034342  |
| PRKX     | 1.2815495  |
| PRL2C1   | 3.290299   |
| PRM2     | 1.673645   |
| PRMT1    | 0.5083232  |

|          |            |
|----------|------------|
| PRMT2    | 2.6584787  |
| PRMT8    | 2.4008772  |
| PROCR    | 1.8394513  |
| PROK2    | 6.0423384  |
| PROM1    | 0.1808939  |
| PRPF3    | 0.46070862 |
| PRPF31   | 0.7827983  |
| PRPF38B  | 0.9727044  |
| PRPF39   | 0.42165422 |
| PRPF4    | 0.20053577 |
| PRPF4B   | 0.4981141  |
| PRR13    | 0.7519512  |
| PRR15    | 1.2866926  |
| PRR15L   | 5.547386   |
| PRR18    | 4.82226    |
| PRR24    | 0.7113652  |
| PRR5L    | 0.70859766 |
| PRR7     | 3.1019082  |
| PRR9     | 1.3026974  |
| PRRC2C   | 1.8835068  |
| PRRG3    | 5.596603   |
| PRRG4    | 0.7548382  |
| PRRT1    | 0.6129658  |
| PRRX1    | 1.4428053  |
| PRRX2    | 2.910242   |
| PRSS12   | 4.472967   |
| PRSS16   | 2.637184   |
| PRSS22   | 2.87144    |
| PRSS23   | 3.7365642  |
| PRSS23OS | 4.472372   |
| PRSS30   | 1.3577383  |
| PRSS53   | 2.2212105  |
| PRSS8    | 1.0318723  |
| PRX      | 8.232361   |
| PSAPL1   | 3.4114962  |
| PSAT1    | 2.080205   |
| PSCA     | 1.5324271  |
| PSD      | 0.81374407 |
| PSD4     | 0.6657481  |
| PSG16    | 0.43904114 |
| PSMC3IP  | 0.343163   |
| PSMD8    | 0.40947008 |
| PSME4    | 0.22642422 |
| PSORS1C2 | 3.8909814  |
| PSPC1    | 0.33204937 |



|         |            |
|---------|------------|
| PSTPIP1 | 1.361382   |
| PTAFR   | 2.7049103  |
| PTAR1   | 1.3316183  |
| PTBP3   | 0.88062716 |
| PTCHD3  | 0.60904074 |
| PTGER1  | 0.18411088 |
| PTGER2  | 0.42513514 |
| PTGER4  | 1.9354014  |
| PTGES3L | 0.22464085 |
| PTGFRN  | 2.8454356  |
| PTGIR   | 2.8060808  |
| PTGIS   | 2.6751819  |
| PTGS2   | 6.7818155  |
| PTHLH   | 2.52777    |
| PTK7    | 0.9741154  |
| PTPN1   | 0.8368406  |
| PTPN11  | 0.5375447  |
| PTPN12  | 1.3814707  |
| PTPN13  | 3.4313374  |
| PTPN14  | 4.1067767  |
| PTPN2   | 1.6378021  |
| PTPN21  | 0.72780085 |
| PTPN22  | 2.3020082  |
| PTPN23  | 1.2740154  |
| PTPN7   | 1.222784   |
| PTPRA   | 0.2381649  |
| PTPRB   | 0.52241325 |
| PTPRC   | 1.2305136  |
| PTPRE   | 1.988481   |
| PTPRG   | 0.94168353 |
| PTPRN2  | 0.5956223  |
| PTPRU   | 2.8985496  |
| PTPRZ1  | 4.0094485  |
| PTRF    | 1.498168   |
| PTRH1   | 0.9304147  |
| PTX3    | 6.595067   |
| PUM1    | 0.3874936  |
| PUM2    | 0.44349337 |
| PURB    | 0.82912874 |
| PUS3    | 0.16719341 |
| PUS7    | 0.2920766  |
| PUS7L   | 0.23037219 |
| PVALB   | 0.92695236 |
| PVR     | 3.8597398  |
| PVRL4   | 1.8843536  |

|           |            |
|-----------|------------|
| PWWP2A    | 0.23162103 |
| PWWP2B    | 0.815238   |
| PXDN      | 0.33439922 |
| PXN       | 1.6619797  |
| PYCARD    | 1.8572445  |
| PYCR2     | 0.636919   |
| PYDC4     | 1.4750533  |
| PYGM      | 3.3119578  |
| PYGO2     | 0.32314205 |
| PYHIN1    | 2.0391068  |
| PYY       | 1.2869751  |
| QK        | 1.7309871  |
| RAB10OS   | 0.9606085  |
| RAB11FIP1 | 1.7486267  |
| RAB11FIP5 | 2.2257261  |
| RAB12     | 0.3641305  |
| RAB15     | 7.5923624  |
| RAB19     | 0.5856228  |
| RAB20     | 0.9692826  |
| RAB25     | 5.453719   |
| RAB27A    | 4.2224336  |
| RAB27B    | 2.1878881  |
| RAB28     | 0.16909456 |
| RAB2B     | 0.706059   |
| RAB31     | 1.3707786  |
| RAB33A    | 1.1032817  |
| RAB33B    | 0.31411648 |
| RAB34     | 0.4190731  |
| RAB35     | 0.52359915 |
| RAB37     | 0.46046543 |
| RAB38     | 1.0343976  |
| RAB3C     | 0.97966146 |
| RAB44     | 4.144387   |
| RAB6A     | 0.2621627  |
| RAB6B     | 3.3182032  |
| RAB8B     | 1.4616966  |
| RAB9B     | 0.36216307 |
| RABGAP1   | 0.54146767 |
| RABGAP1L  | 1.0129042  |
| RABGEF1   | 0.62326765 |
| RABL2     | 0.589509   |
| RAC2      | 1.1675053  |
| RAC3      | 1.7309184  |
| RACGAP1   | 0.26365948 |
| RAD18     | 1.3765459  |

|          |            |
|----------|------------|
| RADIL    | 2.638349   |
| RAE1     | 0.28651285 |
| RAI1     | 0.5752511  |
| RAI14    | 1.0397911  |
| RALB     | 1.3132071  |
| RALBP1   | 0.7604823  |
| RALGAPA1 | 1.6914086  |
| RALGAPA2 | 0.31683636 |
| RALGAPB  | 0.98612356 |
| RALGDS   | 2.7891827  |
| RAMP2    | 0.9354243  |
| RAMP3    | 6.099728   |
| RANBP2   | 0.33810902 |
| RANBP9   | 0.62045383 |
| RAP1A    | 0.5900388  |
| RAP1B    | 1.1863432  |
| RAP1GDS1 | 0.3567338  |
| RAP2A    | 0.5507288  |
| RAP2B    | 0.63792396 |
| RAPGEF3  | 2.1039853  |
| RAPGEF5  | 3.8785257  |
| RAPGEF6  | 1.4166679  |
| RAPGEFL1 | 0.86034393 |
| RARA     | 0.16391945 |
| RARS     | 0.75638914 |
| RASA2    | 2.1330843  |
| RASA3    | 1.2544241  |
| RASAL3   | 0.69985104 |
| RASD1    | 4.785783   |
| RASD2    | 1.9399908  |
| RASEF    | 4.161778   |
| RASGEF1A | 7.4718394  |
| RASGEF1C | 1.7449677  |
| RASGRP3  | 0.5162301  |
| RASGRP4  | 0.83943987 |
| RASIP1   | 4.5453153  |
| RASL10B  | 0.7189436  |
| RASL11A  | 1.9676499  |
| RASL11B  | 1.4331174  |
| RASL12   | 5.592711   |
| RASSF1   | 2.411499   |
| RASSF2   | 2.7209725  |
| RASSF5   | 0.6223402  |
| RASSF9   | 4.6792836  |
| RB1      | 1.279419   |

|         |            |
|---------|------------|
| RB1CC1  | 0.3876748  |
| RBAK    | 0.9772301  |
| RBBP4   | 0.23604918 |
| RBBP8NL | 1.7431285  |
| RBFOX1  | 2.7742004  |
| RBM12   | 0.33061647 |
| RBM15B  | 0.45573378 |
| RBM18   | 0.7063832  |
| RBM24   | 5.3384285  |
| RBM27   | 1.4554706  |
| RBM28   | 0.37790823 |
| RBM3    | 1.0728431  |
| RBM39   | 0.620172   |
| RBM41   | 1.1123803  |
| RBM48   | 0.7520194  |
| RBM5    | 0.40725994 |
| RBMS1   | 1.7251334  |
| RBMS2   | 1.3736606  |
| RBMS3   | 2.1914077  |
| RBMX    | 0.749063   |
| RBMX2   | 0.55262756 |
| RBMXL1  | 0.39343643 |
| RBP7    | 1.9986026  |
| RBPJ    | 1.3347311  |
| RBPJL   | 3.519784   |
| RC3H2   | 0.4087491  |
| RCAN1   | 0.9919205  |
| RCC2    | 0.48283863 |
| RCN1    | 0.5518365  |
| RCOR1   | 0.23000765 |
| RCSD1   | 0.55652285 |
| RD3     | 1.9862907  |
| RECK    | 1.3552356  |
| RECQL   | 0.71213484 |
| REEP5   | 0.6077113  |
| REG3B   | 5.4499755  |
| REG3G   | 11.221197  |
| RELA    | 0.74139357 |
| RELB    | 2.1321206  |
| RELL1   | 1.4222655  |
| RELT    | 1.0461106  |
| REP15   | 0.60049057 |
| REPS1   | 0.5877242  |
| RERE    | 0.6980262  |
| RESP18  | 2.7680523  |

|        |            |
|--------|------------|
| REST   | 1.3096952  |
| RET    | 1.700979   |
| RETN   | 2.4018292  |
| RETNLA | 7.4446454  |
| RETNLB | 2.121073   |
| RETNLG | 2.9243197  |
| REV3L  | 2.5895915  |
| RFTN1  | 1.6901779  |
| RFTN2  | 1.1719372  |
| RFX2   | 1.385412   |
| RFX3   | 0.73327255 |
| RFX8   | 2.4877195  |
| RGCC   | 8.2415085  |
| RGMA   | 0.5545287  |
| RGMB   | 1.4321108  |
| RGS1   | 3.2797594  |
| RGS11  | 2.286849   |
| RGS12  | 0.63197994 |
| RGS14  | 0.9590926  |
| RGS17  | 2.518822   |
| RGS18  | 2.2638779  |
| RGS19  | 1.235362   |
| RGS2   | 2.4729972  |
| RGS22  | 1.8127158  |
| RGS4   | 2.9751468  |
| RGS9   | 3.5335784  |
| RHBDF1 | 0.3295169  |
| RHBDF2 | 1.093895   |
| RHBDL3 | 2.8382912  |
| RHEBL1 | 0.9568331  |
| RHOA   | 0.26532316 |
| RHOB   | 2.2018342  |
| RHOC   | 2.6950884  |
| RHOF   | 2.4531703  |
| RHOG   | 0.4785881  |
| RHOJ   | 3.7702818  |
| RHOQ   | 1.0464225  |
| RHOV   | 2.2265265  |
| RHOX7  | 0.2984624  |
| RIC8   | 0.8024502  |
| RICTOR | 0.9284358  |
| RIF1   | 0.41497755 |
| RIIAD1 | 1.8906887  |
| RILPL1 | 1.41078    |
| RILPL2 | 0.7079239  |

|         |            |
|---------|------------|
| RIN1    | 1.0335565  |
| RIN2    | 3.0075178  |
| RIN3    | 2.1572728  |
| RINL    | 0.538651   |
| RIOK1   | 0.9106102  |
| RIPK1   | 0.6664424  |
| RIPK2   | 2.5903394  |
| RIPK3   | 1.5557728  |
| RIPK4   | 0.52560425 |
| RLF     | 0.79906607 |
| RLIM    | 2.4947114  |
| RMRP    | 1.2808032  |
| RN18S   | 6.273375   |
| RNASE1  | 0.35770035 |
| RNASE10 | 1.3236766  |
| RNASE2A | 4.1561236  |
| RNASE2B | 1.5820367  |
| RNASEL  | 1.449224   |
| RND1    | 1.7811403  |
| RNF111  | 0.34043312 |
| RNF114  | 0.26269722 |
| RNF122  | 1.4147809  |
| RNF144A | 1.388782   |
| RNF146  | 0.9486184  |
| RNF150  | 2.2263947  |
| RNF157  | 0.6504452  |
| RNF166  | 0.21951246 |
| RNF180  | 0.3263116  |
| RNF19B  | 1.1458964  |
| RNF207  | 2.4598227  |
| RNF208  | 3.5107954  |
| RNF213  | 0.63545036 |
| RNF216  | 0.27992153 |
| RNF220  | 0.35005856 |
| RNF32   | 0.87329483 |
| RNF34   | 0.42706442 |
| RNF38   | 1.070075   |
| RNF39   | 1.1260481  |
| RNF41   | 0.27362156 |
| RNF6    | 0.33595562 |
| RNLS    | 0.6218338  |
| RNMT    | 1.130486   |
| RNU12   | 0.35772657 |
| RNU1B6  | 2.6118875  |
| RNU2-10 | 2.0872078  |

|            |            |
|------------|------------|
| ROBO1      | 0.38479185 |
| ROBO4      | 1.8936377  |
| ROCK1      | 0.77979517 |
| ROCK2      | 1.7911196  |
| ROR2       | 2.9619105  |
| RP2H       | 1.0574403  |
| RPGR       | 1.0572433  |
| RPGRIP1    | 2.6815171  |
| RPGRIP1L   | 0.48530412 |
| RPH3AL     | 0.3906846  |
| RPIA       | 0.67893887 |
| RPL29      | 0.41473532 |
| RPL39L     | 0.50892234 |
| RPL3L      | 2.9633744  |
| RPRD2      | 1.2989178  |
| RPRM       | 4.744242   |
| RPRML      | 0.5002885  |
| RPS15A-PS6 | 0.9673171  |
| RPS19      | 0.26845598 |
| RPS4L      | 0.1933775  |
| RPS6KA2    | 2.210785   |
| RPS6KA3    | 1.7599187  |
| RPS6KA4    | 0.37386465 |
| RPS6KB1    | 0.62437916 |
| RPS6KL1    | 0.84040666 |
| RPTN       | 4.2143583  |
| RRAD       | 4.130578   |
| RRAGD      | 1.692208   |
| RRP12      | 1.3549969  |
| RRP1B      | 2.0309858  |
| RS5-8S1    | 2.6410527  |
| RSAD2      | 1.6093502  |
| RSBN1      | 0.9325514  |
| RSBN1L     | 0.7224808  |
| RSL24D1    | 0.3725462  |
| RSPH1      | 3.513255   |
| RSPH3A     | 3.2310705  |
| RSPH9      | 4.080892   |
| RSPO1      | 0.5650716  |
| RTDR1      | 2.9106045  |
| RTKN2      | 5.0564528  |
| RTN1       | 0.83467627 |
| RTN2       | 0.60376453 |
| RTP4       | 0.71141815 |
| RUFY2      | 0.41938257 |

|          |            |
|----------|------------|
| RUFY4    | 0.46481442 |
| RUNDC3B  | 1.1284356  |
| RUNX1    | 4.275058   |
| RUNX1T1  | 3.122151   |
| RUNX2OS1 | 2.1759977  |
| RUSC1    | 0.4787073  |
| RWDD1    | 0.18543768 |
| RYBP     | 1.185236   |
| RYR1     | 2.3850732  |
| RYR2     | 2.60393    |
| S100A11  | 2.6551666  |
| S100A14  | 5.872339   |
| S100A4   | 2.2686367  |
| S100A6   | 3.9606347  |
| S100A8   | 4.37015    |
| S100A9   | 2.8123584  |
| S100B    | 2.194314   |
| S100G    | 2.1364822  |
| S100PBP  | 0.39318657 |
| S1PR1    | 2.0484815  |
| S1PR3    | 2.9833212  |
| S1PR4    | 1.9378417  |
| SAA3     | 3.7311149  |
| SAMD14   | 1.3054147  |
| SAMD4    | 1.7983382  |
| SAMD4B   | 0.8918271  |
| SAMD5    | 1.9396911  |
| SAMD8    | 0.8739722  |
| SAMD9L   | 1.6024852  |
| SAMHD1   | 1.3201313  |
| SAMSN1   | 4.0273476  |
| SAP30    | 1.1161609  |
| SAPCD1   | 0.77270126 |
| SART3    | 0.2786932  |
| SASH1    | 1.2553158  |
| SASH3    | 0.7724967  |
| SASS6    | 1.2164114  |
| SATB1    | 3.045712   |
| SAV1     | 2.0222344  |
| SBDS     | 0.28081703 |
| SBK3     | 6.316168   |
| SBNO2    | 1.8893061  |
| SBSN     | 3.013678   |
| SCAF8    | 0.18929577 |
| SCAPER   | 0.26810527 |



|           |            |
|-----------|------------|
| SCARA5    | 1.3215866  |
| SCARF2    | 1.1318307  |
| SCCPDH    | 1.1876736  |
| SCD2      | 0.7532749  |
| SCEL      | 4.096954   |
| SCG5      | 2.892514   |
| SCGB1A1   | 11.401237  |
| SCGB1C1   | 5.2214746  |
| SCGB3A1   | 11.172961  |
| SCGB3A2   | 7.5824294  |
| SCHIP1    | 3.1216717  |
| SCIN      | 3.6459832  |
| SCML4     | 1.6356575  |
| SCN10A    | 0.8180063  |
| SCN2B     | 0.53054667 |
| SCN3A     | 0.48849154 |
| SCN3B     | 3.5708356  |
| SCN5A     | 1.1331754  |
| SCN7A     | 2.5152051  |
| SCNN1A    | 4.2661824  |
| SCNN1B    | 5.208856   |
| SCOC      | 0.2980771  |
| SCRG1     | 4.506759   |
| SCRN1     | 3.8577092  |
| SCTR      | 0.63427687 |
| SCUBE1    | 1.0684335  |
| SCUBE2    | 2.4833     |
| SCUBE3    | 0.76115537 |
| SCX       | 3.0310426  |
| SDAD1     | 1.0781107  |
| SDC4      | 0.3266015  |
| SDCBP     | 1.6814489  |
| SDCBP2    | 3.5889187  |
| SDCCAG8   | 0.5888226  |
| SDK1      | 0.5461359  |
| SEC1      | 4.9453177  |
| SEC14L1   | 1.3660364  |
| SEC14L3   | 4.2350984  |
| SEC24B    | 0.6414037  |
| SEC61A2   | 0.8141577  |
| SECISBP2  | 0.55780125 |
| SECISBP2L | 2.8140898  |
| SECTM1B   | 3.4813857  |
| SELE      | 6.237152   |
| SELL      | 2.9601846  |

|           |            |
|-----------|------------|
| SELP      | 6.1561007  |
| SELPLG    | 1.3456335  |
| SEMA3A    | 2.175337   |
| SEMA3B    | 3.8868465  |
| SEMA3C    | 3.7591352  |
| SEMA3E    | 2.5082226  |
| SEMA3F    | 2.1155748  |
| SEMA3G    | 6.694681   |
| SEMA4D    | 2.0406885  |
| SEMA4F    | 0.3841691  |
| SEMA5A    | 4.2541237  |
| SEMA6A    | 0.32291222 |
| SEMA6B    | 0.5199151  |
| SEMA7A    | 8.501173   |
| SENP2     | 0.5184121  |
| SENP6     | 2.048287   |
| SENP7     | 0.7490711  |
| SEPN1     | 0.6203046  |
| SERINC3   | 0.72218513 |
| SERINC4   | 1.586941   |
| SERP2     | 1.4477177  |
| SERPINA3B | 0.9443283  |
| SERPINA3F | 2.6782641  |
| SERPINA3G | 0.6021261  |
| SERPINA3I | 2.0233684  |
| SERPINA3N | 0.62102795 |
| SERPINA9  | 3.498487   |
| SERPINB10 | 1.2415214  |
| SERPINB11 | 4.577564   |
| SERPINB12 | 2.953943   |
| SERPINB1A | 2.2663069  |
| SERPINB1B | 1.040617   |
| SERPINB2  | 4.399993   |
| SERPINB3A | 6.302219   |
| SERPINB3B | 0.47437143 |
| SERPINB3C | 8.042018   |
| SERPINB5  | 4.791759   |
| SERPINB6A | 0.79302263 |
| SERPINB6B | 3.692594   |
| SERPINB6C | 0.6252942  |
| SERPINB9  | 1.4936881  |
| SERPINE1  | 8.162041   |
| SERPINE2  | 3.2492533  |
| SERPINH1  | 0.78915644 |
| SERPINI1  | 0.93442655 |

|          |            |
|----------|------------|
| SERTAD1  | 1.0837336  |
| SERTAD2  | 0.23336935 |
| SERTAD3  | 0.96079254 |
| SESN2    | 0.7724576  |
| SESTD1   | 2.330186   |
| SETBP1   | 2.500367   |
| SETD2    | 0.37975407 |
| SETD5    | 1.3025055  |
| SETD7    | 0.637825   |
| SETX     | 0.27722788 |
| SF3B4    | 0.5630202  |
| SFI1     | 1.5782127  |
| SFMBT2   | 0.87082076 |
| SFN      | 2.5009265  |
| SFPQ     | 0.3511448  |
| SFRP4    | 2.2044277  |
| SFRP5    | 2.1208456  |
| SFSWAP   | 0.9511719  |
| SFTA2    | 6.889769   |
| SFTPA1   | 10.024581  |
| SFTPB    | 9.869207   |
| SFTPC    | 10.839071  |
| SFTPD    | 8.144107   |
| SFXN3    | 3.1219358  |
| SGCA     | 2.375127   |
| SGCB     | 1.4508686  |
| SGCD     | 0.30009174 |
| SGCG     | 1.8004944  |
| SGIP1    | 0.7454684  |
| SGK1     | 1.2314005  |
| SGMS1    | 2.0863285  |
| SGPP2    | 1.892241   |
| SH2B2    | 0.8339     |
| SH2B3    | 0.31229258 |
| SH2D1A   | 0.7789097  |
| SH2D1B1  | 2.0258038  |
| SH2D2A   | 0.5522232  |
| SH2D3C   | 1.634594   |
| SH2D4B   | 0.6220858  |
| SH2D5    | 3.1952658  |
| SH3BGR   | 4.1048384  |
| SH3BGRL3 | 1.0307794  |
| SH3BP4   | 1.424809   |
| SH3D21   | 3.5837703  |
| SH3GL3   | 3.3959923  |

|          |            |
|----------|------------|
| SH3KBP1  | 2.0464125  |
| SH3PXD2A | 2.8276339  |
| SH3PXD2B | 3.1010017  |
| SH3RF1   | 0.8611865  |
| SH3TC1   | 1.2109466  |
| SHANK3   | 2.8286371  |
| SHC4     | 0.5642314  |
| SHH      | 0.6276567  |
| SHISA4   | 0.45189404 |
| SHISA5   | 0.7991657  |
| SHOC2    | 0.52478313 |
| SHROOM3  | 1.4723856  |
| SIAH1A   | 0.62102675 |
| SIAH1B   | 0.32364416 |
| SIDT1    | 2.1024652  |
| SIGLEC5  | 3.3432417  |
| SIGLECE  | 0.20599508 |
| SIGLECG  | 1.3054554  |
| SIK1     | 2.4725518  |
| SIK2     | 0.50405264 |
| SIKE1    | 0.43316174 |
| SIM2     | 1.328749   |
| SIN3A    | 0.4905548  |
| SIPA1L2  | 1.9955726  |
| SIPA1L3  | 1.1280417  |
| SIRPB1A  | 1.6375847  |
| SIRPB1B  | 1.8466315  |
| SIRT1    | 0.48348427 |
| SIT1     | 0.6929271  |
| SIX1     | 3.812257   |
| SIX4     | 3.8651736  |
| SKAP1    | 0.34837675 |
| SKAP2    | 1.2936339  |
| SKIL     | 1.816678   |
| SLA      | 2.6894302  |
| SLAIN1   | 2.2118206  |
| SLAMF1   | 3.4626787  |
| SLAMF6   | 1.7293882  |
| SLAMF7   | 1.4159482  |
| SLAMF9   | 0.77368593 |
| SLC10A3  | 0.9467282  |
| SLC10A6  | 5.1233892  |
| SLC10A7  | 1.8615668  |
| SLC11A2  | 0.38126945 |
| SLC12A2  | 1.139288   |

|          |            |
|----------|------------|
| SLC12A4  | 0.79283    |
| SLC12A6  | 0.9236045  |
| SLC13A2  | 2.8310113  |
| SLC13A4  | 1.274514   |
| SLC13A5  | 1.5316744  |
| SLC15A2  | 2.849791   |
| SLC15A3  | 1.8300476  |
| SLC16A13 | 1.0360236  |
| SLC16A3  | 3.273131   |
| SLC16A6  | 0.6970296  |
| SLC16A8  | 1.009906   |
| SLC16A9  | 1.1598625  |
| SLC18A3  | 0.5691011  |
| SLC19A3  | 1.1605716  |
| SLC1A1   | 5.2631145  |
| SLC1A3   | 2.5574512  |
| SLC1A5   | 3.3209777  |
| SLC22A13 | 1.101244   |
| SLC22A17 | 0.40829802 |
| SLC23A2  | 1.2422075  |
| SLC23A3  | 0.8361325  |
| SLC24A3  | 4.080875   |
| SLC24A4  | 3.5328176  |
| SLC25A24 | 1.5410848  |
| SLC25A29 | 0.5555577  |
| SLC25A35 | 2.1317492  |
| SLC25A36 | 2.9739017  |
| SLC25A4  | 2.1512442  |
| SLC25A41 | 1.6400621  |
| SLC26A2  | 1.7399733  |
| SLC26A4  | 4.92711    |
| SLC26A9  | 4.010512   |
| SLC27A3  | 0.72479486 |
| SLC27A6  | 0.917202   |
| SLC28A2  | 1.0220456  |
| SLC28A3  | 2.6171193  |
| SLC29A4  | 1.1093788  |
| SLC2A1   | 1.2615371  |
| SLC2A10  | 1.5433354  |
| SLC2A12  | 2.439136   |
| SLC2A13  | 0.9449115  |
| SLC2A3   | 1.1511145  |
| SLC2A6   | 2.243915   |
| SLC30A7  | 0.33629942 |
| SLC31A2  | 0.5786953  |

|          |            |
|----------|------------|
| SLC34A2  | 5.074162   |
| SLC35A4  | 0.2820487  |
| SLC35E3  | 1.1211321  |
| SLC35E4  | 2.9232492  |
| SLC35F2  | 0.5895314  |
| SLC35F3  | 0.29732227 |
| SLC35G2  | 1.533145   |
| SLC36A2  | 5.396637   |
| SLC36A4  | 0.87836957 |
| SLC37A1  | 0.7430601  |
| SLC38A1  | 2.8533597  |
| SLC38A2  | 0.6641574  |
| SLC38A5  | 0.69936943 |
| SLC39A10 | 2.1080108  |
| SLC39A3  | 0.4490242  |
| SLC39A6  | 2.1308684  |
| SLC39A7  | 0.38683462 |
| SLC39A8  | 2.3875914  |
| SLC39A9  | 0.97342896 |
| SLC3A2   | 1.0485878  |
| SLC41A1  | 2.007537   |
| SLC43A2  | 1.3611865  |
| SLC43A3  | 5.209751   |
| SLC44A2  | 2.0664687  |
| SLC44A4  | 4.1941047  |
| SLC45A4  | 0.46152925 |
| SLC4A11  | 1.7023041  |
| SLC4A3   | 1.4798243  |
| SLC4A5   | 0.85276914 |
| SLC4A8   | 1.6817107  |
| SLC52A3  | 4.2693563  |
| SLC5A1   | 2.7519014  |
| SLC5A9   | 3.4096422  |
| SLC6A14  | 4.616393   |
| SLC6A2   | 0.90876126 |
| SLC6A20A | 1.695363   |
| SLC6A4   | 1.565098   |
| SLC6A8   | 1.0823464  |
| SLC7A1   | 4.416548   |
| SLC7A10  | 0.74865365 |
| SLC7A11  | 4.234845   |
| SLC7A3   | 3.3218658  |
| SLC7A5   | 1.9175067  |
| SLC7A6   | 2.7632341  |
| SLC8A1   | 1.0359745  |

|            |            |
|------------|------------|
| SLC9A1     | 0.8725939  |
| SLC9A4     | 1.84953    |
| SLCO1A5    | 1.3492355  |
| SLCO2A1    | 0.7455578  |
| SLCO3A1    | 2.4067025  |
| SLCO4A1    | 3.6831775  |
| SLCO4C1    | 3.8481584  |
| SLFN1      | 3.7888412  |
| SLFN10-PS  | 2.1505322  |
| SLFN2      | 2.430634   |
| SLFN3      | 3.9759479  |
| SLFN4      | 5.9662714  |
| SLFN8      | 1.6627555  |
| SLIT2      | 1.076462   |
| SLIT3      | 3.355969   |
| SLITRK6    | 0.29260755 |
| SLK        | 0.7156143  |
| SLMO1      | 0.8434851  |
| SLN        | 9.736036   |
| SLPI       | 1.9433913  |
| SLTM       | 0.2031231  |
| SLU7       | 0.38098097 |
| SLURP1     | 2.3209345  |
| SLX4       | 0.5107341  |
| SLX4IP     | 1.0144465  |
| SMAD1      | 1.6488786  |
| SMAD3      | 1.1446466  |
| SMAD4      | 0.58476496 |
| SMAD5      | 0.16562796 |
| SMAD6      | 1.2821164  |
| SMAD7      | 0.8131881  |
| SMAP1      | 0.4534731  |
| SMARCA4    | 0.16677761 |
| SMARCA5-PS | 1.3036947  |
| SMARCD3    | 0.22364902 |
| SMC1A      | 0.19465399 |
| SMC5       | 0.5074229  |
| SMCHD1     | 1.2029524  |
| SMEK2      | 0.45271206 |
| SMG1       | 0.44253254 |
| SMIM15     | 0.48096466 |
| SMIM3      | 3.3069315  |
| SMIM5      | 3.7676885  |
| SMOX       | 2.800736   |
| SMPDL3B    | 2.1396217  |

|          |            |
|----------|------------|
| SMPX     | 2.0875473  |
| SMS      | 0.37567663 |
| SMTN     | 0.7843962  |
| SMTNL1   | 1.9818678  |
| SMTNL2   | 3.3557186  |
| SNAI1    | 2.6049309  |
| SNAP23   | 0.33603144 |
| SNAPC1   | 0.8184304  |
| SNAPIN   | 0.7977123  |
| SNCG     | 1.5517478  |
| SNHG1    | 1.639883   |
| SNHG11   | 1.6164865  |
| SNHG12   | 0.26675606 |
| SNHG18   | 0.30464458 |
| SNHG3    | 0.31449223 |
| SNHG5    | 1.7555583  |
| SNHG7    | 0.26474237 |
| SNN      | 1.3131847  |
| SNORA74A | 1.52847    |
| SNRNP40  | 0.20462322 |
| SNRPD1   | 0.6057277  |
| SNRPF    | 0.35720778 |
| SNTB2    | 2.3708596  |
| SNTN     | 3.4306624  |
| SNX1     | 1.3572073  |
| SNX10    | 0.6114931  |
| SNX11    | 0.4939251  |
| SNX13    | 0.35047388 |
| SNX17    | 0.5995393  |
| SNX18    | 1.1205893  |
| SNX20    | 2.3777208  |
| SNX22    | 2.7733874  |
| SNX25    | 1.0279722  |
| SNX29    | 0.9166086  |
| SNX30    | 0.47254944 |
| SNX6     | 0.25310993 |
| SOAT1    | 0.91009283 |
| SOBP     | 3.0999622  |
| SOCS1    | 1.6230025  |
| SOCS2    | 2.1204147  |
| SOCS3    | 4.0248637  |
| SOCS4    | 0.41125202 |
| SOCS5    | 0.782423   |
| SOCS7    | 0.657146   |
| SOGA1    | 0.27864838 |



|            |            |
|------------|------------|
| SON        | 0.46853876 |
| SORBS3     | 0.37249756 |
| SORCS2     | 3.5710993  |
| SORL1      | 3.03585    |
| SORT1      | 2.680657   |
| SOS2       | 0.4980402  |
| SOSTDC1    | 3.2619832  |
| SOWAHC     | 0.86135054 |
| SOX10      | 1.3191242  |
| SOX17      | 0.84169436 |
| SOX2       | 3.8747914  |
| SOX4       | 2.0121493  |
| SOX7       | 2.9437785  |
| SP100      | 1.046489   |
| SP140      | 1.0597267  |
| SP2        | 1.6127439  |
| SP3OS      | 0.7601485  |
| SP4        | 0.899127   |
| SP6        | 1.82708    |
| SPA17      | 0.91395545 |
| SPACA6     | 1.8104525  |
| SPAG1      | 0.77542853 |
| SPAG16     | 1.5264153  |
| SPAG17     | 0.8077071  |
| SPAG6      | 4.4802322  |
| SPAG9      | 0.31143856 |
| SPARCL1    | 4.661193   |
| SPATA1     | 0.5846894  |
| SPATA13    | 0.28569603 |
| SPATA17    | 0.6050918  |
| SPATA18    | 3.0166392  |
| SPATA31    | 0.4572935  |
| SPATA31D1B | 1.0614641  |
| SPATA6     | 1.9942579  |
| SPATA7     | 0.45659828 |
| SPATS2     | 0.6110444  |
| SPDEF      | 2.1549544  |
| SPECC1     | 1.2768025  |
| SPECC1L    | 1.5260315  |
| SPEER1-PS1 | 2.5595572  |
| SPEER2     | 1.1143062  |
| SPEER4B    | 1.7790828  |
| SPEER4C    | 3.1074924  |
| SPEER4D    | 1.6430047  |
| SPEER5-PS1 | 2.8066304  |

|           |            |
|-----------|------------|
| SPEF1     | 1.1571703  |
| SPEF2     | 1.5869856  |
| SPEM1     | 0.9781897  |
| SPEN      | 0.2858014  |
| SPERT     | 0.7993319  |
| SPG21     | 0.44422722 |
| SPHK1     | 8.527199   |
| SPI1      | 1.6046071  |
| SPIB      | 2.7037516  |
| SPICE1    | 0.2340765  |
| SPIDR     | 2.090498   |
| SPIN4     | 1.6997702  |
| SPINK2    | 0.84518313 |
| SPINK5    | 5.9559793  |
| SPINT1    | 4.2794576  |
| SPIRE1    | 1.7783229  |
| SPN       | 1.527298   |
| SPOCK2    | 5.549729   |
| SPON1     | 4.088042   |
| SPOPL     | 0.82161355 |
| SPP1      | 0.15917444 |
| SPRED1    | 1.4605398  |
| SPRED2    | 1.2894292  |
| SPRR1A    | 0.36727667 |
| SPRR1B    | 1.6832259  |
| SPRR2B    | 2.8562236  |
| SPRR2D    | 9.195426   |
| SPRR2E    | 2.9325757  |
| SPRR2F    | 2.389241   |
| SPRR2G    | 1.4832437  |
| SPRR2H    | 2.5655794  |
| SPRR2I    | 6.6363096  |
| SPRR2J-PS | 3.7162876  |
| SPRR3     | 3.79263    |
| SPRTN     | 0.5269449  |
| SPRY1     | 2.6193838  |
| SPRY2     | 2.1336806  |
| SPSB1     | 1.3673306  |
| SPTAN1    | 0.464231   |
| SPTB      | 0.8927927  |
| SPTBN1    | 2.711038   |
| SPTLC2    | 1.7305217  |
| SPTY2D1   | 0.54379463 |
| SRCAP     | 1.2171922  |
| SRCIN1    | 2.4923575  |

|            |            |
|------------|------------|
| SRF        | 0.5676975  |
| SRFBP1     | 0.22255993 |
| SRGAP1     | 2.5428958  |
| SRGN       | 2.9641466  |
| SRI        | 0.56572723 |
| SRL        | 4.6244984  |
| SRPK3      | 0.8469887  |
| SRPX       | 3.3923419  |
| SRRM2      | 1.0637956  |
| SRRT       | 0.2356062  |
| SRSF10     | 0.271245   |
| SRSF11     | 0.7830868  |
| SRSF3      | 1.0222192  |
| SRSF5      | 0.36251307 |
| SRSF7      | 0.39538097 |
| SSB        | 1.2688689  |
| SSBP2      | 0.3979864  |
| SSBP4      | 0.32794    |
| SSH2       | 1.2592449  |
| SSH3       | 0.7246094  |
| SSPN       | 1.3446302  |
| ST14       | 3.7980766  |
| ST3GAL2    | 1.742063   |
| ST3GAL6    | 3.1338978  |
| ST6GALNAC2 | 1.8393316  |
| ST6GALNAC5 | 2.6547303  |
| ST8SIA1    | 1.2738068  |
| ST8SIA4    | 1.7025814  |
| ST8SIA6    | 2.852315   |
| STAC2      | 2.0682576  |
| STAG1      | 0.37184763 |
| STAG2      | 0.41453075 |
| STAM       | 0.6151786  |
| STAM2      | 1.0407138  |
| STAP1      | 0.3114488  |
| STAR       | 0.45800138 |
| STARD13    | 0.87596893 |
| STARD3NL   | 0.1442051  |
| STAT1      | 0.37354946 |
| STAT3      | 1.1934619  |
| STAT4      | 2.1863155  |
| STC2       | 1.6674292  |
| STEAP1     | 5.0714064  |
| STEAP2     | 0.50992775 |
| STEAP4     | 0.28921223 |

|         |            |
|---------|------------|
| STFA1   | 4.472617   |
| STFA2   | 4.473102   |
| STFA2L1 | 5.3194184  |
| STFA3   | 5.788344   |
| STIL    | 0.5656841  |
| STK10   | 0.7597885  |
| STK11IP | 0.6090903  |
| STK17B  | 2.5017085  |
| STK19   | 0.7145839  |
| STK24   | 0.38867188 |
| STK3    | 0.58242655 |
| STK33   | 5.171219   |
| STK36   | 1.1037309  |
| STK39   | 2.0592566  |
| STK4    | 0.9083972  |
| STK40   | 0.24390888 |
| STMN2   | 1.6379623  |
| STMN4   | 1.1541066  |
| STMND1  | 2.3365784  |
| STOML1  | 0.2575631  |
| STON1   | 0.8154342  |
| STON2   | 0.7954831  |
| STRA6   | 3.7720716  |
| STRIP2  | 2.8528605  |
| STRN    | 1.043803   |
| STRN3   | 0.49952316 |
| STX11   | 3.0348253  |
| STX12   | 1.1351619  |
| STX16   | 0.67468023 |
| STX19   | 1.0636597  |
| STX3    | 1.5662236  |
| STX6    | 1.2363615  |
| STX7    | 0.7843499  |
| STXBP1  | 1.6604123  |
| STXBP3A | 0.98812675 |
| STXBP3B | 1.9954877  |
| STYX    | 0.80475473 |
| STYXL1  | 2.6348124  |
| SUCO    | 1.9836524  |
| SUFU    | 0.8190932  |
| SULF1   | 3.0510106  |
| SULF2   | 0.3206854  |
| SULT2B1 | 2.1158366  |
| SUN1    | 0.38954592 |
| SURF6   | 0.17556763 |

|          |            |
|----------|------------|
| SUSD2    | 1.0706053  |
| SUSD3    | 0.5445533  |
| SUSD4    | 3.8516483  |
| SUV39H1  | 1.9957728  |
| SUV420H1 | 1.2112737  |
| SUZ12    | 0.18389797 |
| SVEP1    | 2.5668945  |
| SVIL     | 1.0874186  |
| SWAP70   | 1.3341465  |
| SWT1     | 0.4253974  |
| SYCE1    | 0.98659205 |
| SYCN     | 0.74194884 |
| SYDE1    | 1.4717216  |
| SYF2     | 1.4549446  |
| SYK      | 1.7485085  |
| SYN2     | 1.9166427  |
| SYNC     | 2.6918638  |
| SYNCRIP  | 1.0238423  |
| SYNE1    | 0.6926038  |
| SYNE2    | 0.9123869  |
| SYNGR1   | 2.6679792  |
| SYNJ1    | 1.254147   |
| SYNM     | 2.6694956  |
| SYNPO    | 2.8100023  |
| SYNPO2   | 2.6655428  |
| SYNRG    | 0.5249219  |
| SYT11    | 1.86731    |
| SYT12    | 2.1213114  |
| SYT13    | 5.5682564  |
| SYT5     | 5.4889374  |
| SYTL2    | 1.0978305  |
| SYTL3    | 1.7008948  |
| T2       | 2.3555007  |
| TAB3     | 0.44628    |
| TACC1    | 1.3163891  |
| TACR1    | 1.318716   |
| TACSTD2  | 3.44461    |
| TAF1     | 1.4997368  |
| TAF1D    | 1.3480635  |
| TAF3     | 0.88864326 |
| TAF5     | 0.384614   |
| TAF7     | 0.8295579  |
| TAF7L    | 0.7551613  |
| TAF9B    | 2.1537216  |
| TAGAP    | 1.6945009  |

|          |            |
|----------|------------|
| TAGAP1   | 0.87314034 |
| TAGLN    | 0.6978326  |
| TAGLN2   | 1.853991   |
| TAL1     | 1.5637898  |
| TANC1    | 1.3581281  |
| TANC2    | 1.9658835  |
| TANK     | 0.93147373 |
| TAOK1    | 0.9840317  |
| TAP1     | 0.45326138 |
| TARM1    | 2.7144814  |
| TAS2R131 | 1.4684496  |
| TAX1BP1  | 0.9267831  |
| TBC1D1   | 0.59334755 |
| TBC1D10B | 0.9061904  |
| TBC1D10C | 0.32827473 |
| TBC1D12  | 1.2755709  |
| TBC1D14  | 0.19351578 |
| TBC1D16  | 1.9049706  |
| TBC1D19  | 0.8224087  |
| TBC1D2   | 2.280118   |
| TBC1D20  | 1.4405804  |
| TBC1D22B | 0.5414715  |
| TBC1D23  | 0.6298957  |
| TBC1D30  | 0.20160532 |
| TBC1D4   | 1.2982807  |
| TBC1D5   | 1.4699836  |
| TBC1D8   | 3.4312491  |
| TBC1D9   | 1.5927963  |
| TBK1     | 1.2851996  |
| TBKBP1   | 0.29672813 |
| TBL1XR1  | 0.48241282 |
| TBPL1    | 0.45797396 |
| TBRG1    | 0.2075715  |
| TBX1     | 6.9883494  |
| TBX2     | 2.0175118  |
| TBX22    | 0.27719665 |
| TBX4     | 6.9987926  |
| TBX5     | 6.167051   |
| TBX6     | 0.29242706 |
| TC2N     | 3.349247   |
| TCAP     | 6.586297   |
| TCEAL1   | 0.5341811  |
| TCEAL3   | 0.86738944 |
| TCEAL6   | 3.1751273  |
| TCEAL7   | 1.5330775  |

|          |            |
|----------|------------|
| TCEANC2  | 0.20870686 |
| TCERG1   | 0.6857867  |
| TCF15    | 1.1489105  |
| TCF20    | 0.184834   |
| TCF21    | 0.88731956 |
| TCF23    | 3.0688133  |
| TCF4     | 2.0809965  |
| TCF7     | 0.40763903 |
| TCHH     | 3.3816717  |
| TCHP     | 0.49418068 |
| TCL1B2   | 0.5739634  |
| TCOF1    | 0.99846935 |
| TCP10B   | 0.5485172  |
| TCP10C   | 0.4770627  |
| TCP11    | 2.8608854  |
| TCSTV3   | 0.40663648 |
| TCTE1    | 0.64498997 |
| TCTEX1D2 | 1.2935658  |
| TCTEX1D4 | 4.5990777  |
| TCTN2    | 1.1263566  |
| TCTN3    | 1.5842409  |
| TDG      | 0.3195014  |
| TDRD3    | 0.19509935 |
| TEAD1    | 1.9980583  |
| TEAD3    | 1.2833841  |
| TEAD4    | 4.595139   |
| TECRL    | 1.236969   |
| TEK      | 0.15780067 |
| TEKT1    | 7.102256   |
| TEKT2    | 0.41491532 |
| TEKT4    | 2.2111435  |
| TEN1     | 1.0079961  |
| TENC1    | 0.47389793 |
| TEPP     | 0.83503103 |
| TERC     | 1.2952597  |
| TERF2    | 0.53271246 |
| TES      | 3.6542392  |
| TESCL    | 0.85499334 |
| TET2     | 0.9536114  |
| TET3     | 0.39559126 |
| TEX26    | 3.327848   |
| TEX30    | 0.2304802  |
| TEX40    | 1.2522285  |
| TEX9     | 0.3406284  |
| TFAP2A   | 1.507108   |

|          |            |
|----------|------------|
| TFCP2L1  | 0.80938673 |
| TFDP2    | 0.8735242  |
| TFF1     | 1.9244885  |
| TFF2     | 5.2159343  |
| TG       | 1.7042487  |
| TGFB1I1  | 2.691111   |
| TGFB2    | 2.7732306  |
| TGFB3    | 1.7257748  |
| TGFBI    | 0.7787914  |
| TGFBR1   | 0.98875713 |
| TGFBR2   | 1.6033506  |
| TGFBR3   | 1.7483993  |
| TGIF1    | 1.0051022  |
| TGIF2    | 0.86864686 |
| TGM2     | 1.6620135  |
| TGOLN1   | 0.24897861 |
| THAP2    | 0.43477988 |
| THBD     | 3.8901706  |
| THBS1    | 6.55743    |
| THBS3    | 2.6157742  |
| THBS4    | 3.7257855  |
| THEM5    | 3.0202086  |
| THG1L    | 1.2124093  |
| THOC2    | 0.45070076 |
| THOC6    | 0.35284615 |
| THRAP3   | 0.36864662 |
| THSD4    | 2.8771076  |
| THSD7A   | 0.9141884  |
| TIAM1    | 1.2450492  |
| TIAM2    | 2.666481   |
| TICRR    | 0.4751413  |
| TIFA     | 1.9953904  |
| TIGD2    | 0.3737383  |
| TIGIT    | 3.6209788  |
| TIMELESS | 2.4420357  |
| TIMP1    | 5.9118457  |
| TIMP2    | 1.9408188  |
| TIMP3    | 5.539886   |
| TIMP4    | 2.1320868  |
| TINAG    | 2.8176904  |
| TINAGL1  | 2.5267363  |
| TIPARP   | 3.0193152  |
| TJP1     | 1.2872844  |
| TJP2     | 1.8740768  |
| TLE3     | 0.8318467  |



|          |            |
|----------|------------|
| TLE4     | 0.23465538 |
| TLK2     | 1.0227175  |
| TLN1     | 0.5632992  |
| TLR13    | 1.6094165  |
| TLR2     | 1.6774573  |
| TLR4     | 1.5636492  |
| TLR6     | 1.0308485  |
| TLR7     | 1.0072207  |
| TLR8     | 2.4631145  |
| TM4SF1   | 2.4085293  |
| TM6SF1   | 0.86693573 |
| TMBIM1   | 0.79831266 |
| TMC4     | 3.376832   |
| TMC5     | 5.080132   |
| TMCC2    | 1.1830313  |
| TMCC3    | 2.7301435  |
| TMCO3    | 1.0309699  |
| TMED8    | 0.96959925 |
| TMED9    | 0.24640608 |
| TMEFF1   | 3.159181   |
| TMEM100  | 6.2316413  |
| TMEM107  | 1.0733151  |
| TMEM116  | 3.0163045  |
| TMEM117  | 1.3670893  |
| TMEM119  | 4.6363306  |
| TMEM120B | 0.30065536 |
| TMEM123  | 0.8084917  |
| TMEM128  | 0.2341547  |
| TMEM132C | 1.0283656  |
| TMEM132D | 2.4995286  |
| TMEM138  | 0.2450347  |
| TMEM139  | 1.1269045  |
| TMEM140  | 0.86839485 |
| TMEM151A | 0.6172035  |
| TMEM151B | 0.48918748 |
| TMEM154  | 2.0545325  |
| TMEM159  | 2.7896085  |
| TMEM164  | 0.49741268 |
| TMEM165  | 1.0417147  |
| TMEM167B | 0.21580458 |
| TMEM17   | 0.15849042 |
| TMEM170B | 0.4571519  |
| TMEM171  | 1.2295399  |
| TMEM173  | 1.9512148  |
| TMEM178  | 1.7395549  |

|            |            |
|------------|------------|
| TMEM181A   | 1.0759859  |
| TMEM181B-f | 4.066783   |
| TMEM189    | 0.4239266  |
| TMEM194B   | 0.34245753 |
| TMEM196    | 1.2276685  |
| TMEM198    | 1.306067   |
| TMEM2      | 2.3517165  |
| TMEM200A   | 1.0553236  |
| TMEM202    | 0.734637   |
| TMEM204    | 1.4559803  |
| TMEM212    | 6.9157233  |
| TMEM213    | 6.0053134  |
| TMEM229B   | 0.39842653 |
| TMEM231    | 1.5219424  |
| TMEM232    | 3.4931495  |
| TMEM243    | 0.56700945 |
| TMEM246    | 2.4158525  |
| TMEM251    | 0.37946033 |
| TMEM252    | 5.713475   |
| TMEM255B   | 0.7054353  |
| TMEM38A    | 1.8420911  |
| TMEM40     | 2.5783572  |
| TMEM43     | 0.42057562 |
| TMEM45B    | 1.2915642  |
| TMEM50B    | 2.3556256  |
| TMEM54     | 1.7115467  |
| TMEM59L    | 2.5309477  |
| TMEM61     | 1.4468842  |
| TMEM63A    | 0.4317627  |
| TMEM68     | 0.5134654  |
| TMEM79     | 0.5312791  |
| TMEM87A    | 1.8975701  |
| TMEM87B    | 1.0581465  |
| TMEM88     | 0.7510209  |
| TMEM9B     | 0.3519435  |
| TMF1       | 0.57706976 |
| TMOD1      | 4.935547   |
| TMOD3      | 0.5970864  |
| TMPRSS11A  | 1.905236   |
| TMPRSS11G  | 2.3955972  |
| TMPRSS13   | 5.2050676  |
| TMPRSS4    | 1.9491005  |
| TMSB10     | 1.5247326  |
| TMTC1      | 2.8529453  |
| TMX3       | 1.2321496  |

|           |            |
|-----------|------------|
| TNC       | 1.4975402  |
| TNF       | 3.7834496  |
| TNFAIP1   | 0.8339672  |
| TNFAIP2   | 0.9838433  |
| TNFAIP3   | 4.2975836  |
| TNFAIP6   | 1.9653835  |
| TNFAIP8   | 1.6482368  |
| TNFAIP8L3 | 1.6727545  |
| TNFRSF10B | 2.8815746  |
| TNFRSF11A | 0.9960127  |
| TNFRSF12A | 1.8393402  |
| TNFRSF13B | 2.603518   |
| TNFRSF13C | 2.9831812  |
| TNFRSF17  | 0.28229785 |
| TNFRSF18  | 2.324698   |
| TNFRSF1B  | 1.5765085  |
| TNFRSF21  | 1.1721253  |
| TNFRSF23  | 0.61126184 |
| TNFRSF25  | 0.9008632  |
| TNFRSF26  | 3.798902   |
| TNFRSF4   | 1.4969172  |
| TNFSF11   | 1.3256779  |
| TNFSF13B  | 2.3018198  |
| TNFSF13OS | 1.172957   |
| TNFSF14   | 1.8618245  |
| TNFSF15   | 2.6855485  |
| TNFSF8    | 0.7684989  |
| TNFSF9    | 4.410564   |
| TNIK      | 0.4513924  |
| TNIP1     | 2.9197683  |
| TNIP2     | 1.5451984  |
| TNIP3     | 2.6862535  |
| TNK1      | 5.264709   |
| TNKS      | 1.0745041  |
| TNKS1BP1  | 0.60326576 |
| TNKS2     | 0.38150167 |
| TNN       | 2.4856093  |
| TNNC1     | 1.243432   |
| TNNC2     | 8.57741    |
| TNNI2     | 6.2824864  |
| TNNI3     | 3.8245807  |
| TNNI3K    | 0.61338735 |
| TNNT2     | 6.7358956  |
| TNNT3     | 5.3878202  |
| TNP2      | 0.5894511  |

|          |            |
|----------|------------|
| TNS1     | 1.9212656  |
| TNS4     | 0.5471256  |
| TOM1L2   | 0.32705402 |
| TOP2A    | 0.88742733 |
| TOPBP1   | 0.3415413  |
| TOR3A    | 0.5877404  |
| TOX2     | 1.5828302  |
| TOX3     | 3.5283558  |
| TOX4     | 0.28495407 |
| TPBG     | 3.535878   |
| TPD52    | 1.6278052  |
| TPM1     | 0.7925205  |
| TPM2     | 2.1732626  |
| TPM3     | 1.3417373  |
| TPM4     | 2.6285453  |
| TPPP3    | 4.135328   |
| TPR      | 1.0512376  |
| TPRG     | 1.8128009  |
| TPSB2    | 1.8725457  |
| TRA2A    | 1.129477   |
| TRABD2B  | 2.939497   |
| TRAF1    | 3.8939877  |
| TRAF3    | 0.5675473  |
| TRAF3IP2 | 1.4614625  |
| TRAF6    | 0.5436778  |
| TRAF7    | 0.77013063 |
| TRAK2    | 1.358283   |
| TRAPPC10 | 0.320014   |
| TRAPPC8  | 0.26804996 |
| TRAT1    | 0.6332779  |
| TRAV3N-3 | 0.3318298  |
| TRCG1    | 0.6834655  |
| TRDMT1   | 0.20995617 |
| TRDN     | 1.6207867  |
| TREM1    | 2.521728   |
| TREM2    | 3.3044086  |
| TREM3    | 3.6383777  |
| TREML2   | 1.7590084  |
| TRERF1   | 1.9721887  |
| TREX1    | 1.9431944  |
| TREX2    | 4.42312    |
| TRIB1    | 0.7276063  |
| TRIB2    | 2.6539097  |
| TRIB3    | 0.8895712  |
| TRIM10   | 2.040784   |

|           |            |
|-----------|------------|
| TRIM12A   | 0.54737806 |
| TRIM12C   | 1.455709   |
| TRIM13    | 0.9298663  |
| TRIM15    | 1.7815061  |
| TRIM16    | 4.282848   |
| TRIM21    | 0.34290123 |
| TRIM29    | 3.9259887  |
| TRIM3     | 1.1889443  |
| TRIM30A   | 1.4289613  |
| TRIM30B   | 2.8710723  |
| TRIM30C   | 1.7508609  |
| TRIM30D   | 1.7044616  |
| TRIM33    | 0.6648226  |
| TRIM34A   | 0.4408641  |
| TRIM34B   | 0.7106662  |
| TRIM35    | 1.6246595  |
| TRIM36    | 0.6964431  |
| TRIM39    | 0.557312   |
| TRIM44    | 0.41874456 |
| TRIM46    | 1.0347886  |
| TRIM54    | 3.2715116  |
| TRIM56    | 2.007823   |
| TRIM59    | 0.8465643  |
| TRIM62    | 1.0053642  |
| TRIM63    | 5.7284164  |
| TRIM69    | 1.0408626  |
| TRIM72    | 1.3507886  |
| TRIM8     | 0.35892344 |
| TRIO      | 0.5050616  |
| TRIP10    | 1.2490177  |
| TRIP11    | 0.81332016 |
| TRIQK     | 0.4890623  |
| TRNP1     | 3.0238876  |
| TRNT1     | 0.30985212 |
| TROVE2    | 1.6272197  |
| TRP53BP1  | 0.5005667  |
| TRP53BP2  | 0.58623385 |
| TRP53I11  | 2.500945   |
| TRP53INP1 | 0.4498725  |
| TRP73     | 0.75920606 |
| TRPC1     | 0.77642846 |
| TRPC6     | 3.2186859  |
| TRPM6     | 3.9725657  |
| TRPS1     | 2.6549711  |
| TRPV2     | 1.2643514  |

|          |            |
|----------|------------|
| TRPV4    | 2.5700846  |
| TRPV6    | 3.997891   |
| TSC22D1  | 1.0813346  |
| TSC22D3  | 0.50190735 |
| TSGA10   | 1.6260452  |
| TSHZ1    | 0.43974972 |
| TSHZ3    | 1.8598804  |
| TSLP     | 2.9447913  |
| TSNAXIP1 | 1.9723647  |
| TSPAN1   | 9.685123   |
| TSPAN11  | 5.59625    |
| TSPAN13  | 2.1258378  |
| TSPAN15  | 0.82661057 |
| TSPAN17  | 0.244524   |
| TSPAN18  | 0.666697   |
| TSPAN2   | 3.7631402  |
| TSPAN3   | 1.2837219  |
| TSPAN32  | 0.42578745 |
| TSPAN5   | 3.5426197  |
| TSPAN6   | 1.5278912  |
| TSPAN8   | 4.4403424  |
| TSPAN9   | 0.29118443 |
| TSPO     | 0.42440748 |
| TSPO2    | 0.83029985 |
| TSPYL2   | 1.0898714  |
| TSPYL3   | 0.93007016 |
| TSPYL4   | 1.5382061  |
| TSR1     | 0.5451031  |
| TSSK4    | 0.61825156 |
| TTBK2    | 1.0204177  |
| TTC12    | 2.75809    |
| TTC16    | 1.0230112  |
| TTC18    | 3.9144688  |
| TTC21A   | 2.9755542  |
| TTC22    | 0.88589525 |
| TTC25    | 0.49845314 |
| TTC26    | 0.80279064 |
| TTC28    | 0.3647666  |
| TTC29    | 3.583594   |
| TTC34    | 4.1474686  |
| TTC39B   | 1.0638547  |
| TTC9     | 2.111638   |
| TTLL11   | 1.0701423  |
| TTLL2    | 1.0436502  |
| TTLL3    | 1.6279755  |

|          |            |
|----------|------------|
| TTLL6    | 3.4352844  |
| TTLL7    | 3.159776   |
| TTLL9    | 2.1883268  |
| TTN      | 3.73734    |
| TTPAL    | 0.9907613  |
| TTYH1    | 0.6775081  |
| TUBA1A   | 3.3153872  |
| TUBA1B   | 0.15691423 |
| TUBA8    | 0.92764425 |
| TUBB2B   | 3.121043   |
| TUBB3    | 0.54621744 |
| TUBB4A   | 0.31021738 |
| TUBB6    | 1.5189543  |
| TUBG2    | 0.7347255  |
| TUBGCP5  | 1.0357032  |
| TUFT1    | 0.58342695 |
| TULP3    | 1.4527464  |
| TULP4    | 0.6976156  |
| TUSC1    | 0.77125645 |
| TUSC5    | 1.999974   |
| TWF2     | 0.52193975 |
| TWIST2   | 2.1033823  |
| TXK      | 2.0250626  |
| TXLNB    | 4.672156   |
| TXNIP    | 1.266398   |
| TXNRD3   | 1.8340254  |
| TYRO3    | 1.8487878  |
| TYROBP   | 0.20925522 |
| U2AF1    | 0.25090075 |
| UACA     | 1.0629406  |
| UBA1Y    | 0.42686868 |
| UBA2     | 0.22083187 |
| UBA6     | 0.27590108 |
| UBALD2   | 0.5466614  |
| UBASH3B  | 1.4440651  |
| UBE2H    | 0.8499336  |
| UBE2O    | 0.26410294 |
| UBE2Q2   | 1.4286227  |
| UBE2V2   | 0.45525837 |
| UBE3A    | 0.2564354  |
| UBE4BOS1 | 0.54827046 |
| UBL3     | 0.433949   |
| UBN1     | 1.3286748  |
| UBN2     | 0.18606234 |
| UBP1     | 0.9039159  |

|        |            |
|--------|------------|
| UBQLN2 | 0.41133547 |
| UBTD2  | 1.6509852  |
| UBXN10 | 4.621902   |
| UBXN11 | 2.0074244  |
| UBXN2A | 0.78330374 |
| UBXN7  | 0.27586293 |
| UCHL1  | 1.7051866  |
| UCK2   | 0.9781585  |
| UCP1   | 2.4183905  |
| UCP2   | 1.9773273  |
| UCP3   | 1.6485     |
| UGGT2  | 0.39015746 |
| UGT2A1 | 2.480959   |
| UIMC1  | 1.9931037  |
| ULK4   | 0.9554014  |
| UNC13B | 2.5561438  |
| UNC13D | 0.8875756  |
| UNC45B | 1.366107   |
| UNC5B  | 1.0212293  |
| UNC5C  | 1.6900063  |
| UNC79  | 0.5621705  |
| UPF3A  | 0.1752305  |
| UPF3B  | 0.32064438 |
| UPK1B  | 2.2339323  |
| UPK2   | 2.811908   |
| UPK3BL | 2.2248769  |
| UPP1   | 4.816348   |
| URB2   | 1.9777226  |
| USP1   | 0.37528133 |
| USP11  | 1.0635314  |
| USP13  | 1.69982    |
| USP16  | 0.6288123  |
| USP18  | 0.66593456 |
| USP31  | 0.6957078  |
| USP32  | 0.61516905 |
| USP33  | 0.26843262 |
| USP34  | 1.705411   |
| USP36  | 0.69665766 |
| USP37  | 1.7095287  |
| USP42  | 0.2934065  |
| USP43  | 1.9732442  |
| USP47  | 0.8174195  |
| USP53  | 2.3961117  |
| USP54  | 2.2246923  |
| USP6NL | 2.2457085  |



|         |            |
|---------|------------|
| USP7    | 0.26909256 |
| USP9X   | 1.0312128  |
| UTF1    | 2.7843256  |
| UTP14A  | 1.8231668  |
| UTRN    | 1.1012611  |
| VAMP2   | 0.23388863 |
| VAMP3   | 1.0633917  |
| VAMP4   | 0.24754906 |
| VAMP5   | 0.79716396 |
| VANGL2  | 0.76381636 |
| VAPA    | 0.45069742 |
| VASN    | 0.35794878 |
| VASP    | 1.8506393  |
| VAT1L   | 0.370934   |
| VAV1    | 1.6077347  |
| VAV3    | 0.82796955 |
| VBP1    | 0.46576738 |
| VCAM1   | 0.64147043 |
| VCAN    | 2.3611517  |
| VCL     | 0.7393837  |
| VDR     | 3.0891743  |
| VEGFA   | 1.2638874  |
| VEPH1   | 1.2793367  |
| VGFB    | 4.270973   |
| VGLL3   | 0.2121911  |
| VGLL4   | 1.72119    |
| VILL    | 0.6470089  |
| VIM     | 0.58179474 |
| VIPR2   | 1.8243635  |
| VIT     | 0.58290863 |
| VMN1R52 | 0.3970406  |
| VMN1R59 | 0.8013241  |
| VMN1R70 | 0.2747221  |
| VMN1R87 | 1.3740427  |
| VMN2R11 | 1.0384784  |
| VOPP1   | 1.2252102  |
| VPREB3  | 2.5900984  |
| VPS13A  | 0.54295826 |
| VPS37C  | 0.5931802  |
| VPS51   | 1.1049056  |
| VPS53   | 0.44576883 |
| VPS54   | 0.44048882 |
| VRK1    | 0.9237871  |
| VSIG10  | 0.98881245 |
| VSIG10L | 1.0801568  |

|        |            |
|--------|------------|
| VSIG2  | 3.6289196  |
| VSIG8  | 4.097329   |
| VSTM4  | 1.3347456  |
| VWA3A  | 4.6560507  |
| VWA5A  | 0.25628662 |
| VWF    | 1.6854692  |
| WARS   | 1.9059324  |
| WARS2  | 0.1823821  |
| WAS    | 0.74765587 |
| WASF2  | 1.8320656  |
| WBP5   | 1.9911385  |
| WDFY3  | 0.28352642 |
| WDFY4  | 0.9047117  |
| WDHD1  | 0.5057075  |
| WDPCP  | 0.5138378  |
| WDR1   | 0.8159137  |
| WDR16  | 5.0823874  |
| WDR35  | 0.806025   |
| WDR37  | 0.48316336 |
| WDR38  | 0.56401396 |
| WDR43  | 0.5219836  |
| WDR44  | 1.0935872  |
| WDR45B | 0.5007596  |
| WDR47  | 2.5058131  |
| WDR48  | 0.39487314 |
| WDR49  | 0.3679614  |
| WDR52  | 1.349292   |
| WDR54  | 1.3190241  |
| WDR5B  | 2.9176946  |
| WDR63  | 2.7230883  |
| WDR65  | 3.95331    |
| WDR66  | 3.9847925  |
| WDR75  | 0.5080404  |
| WDR76  | 0.8165381  |
| WDR78  | 3.3651333  |
| WDR92  | 1.9811702  |
| WDR95  | 1.6950302  |
| WDR96  | 2.9471269  |
| WFDC10 | 1.9171624  |
| WFDC12 | 4.121529   |
| WFDC17 | 1.444284   |
| WFDC18 | 4.578006   |
| WFDC2  | 5.031354   |
| WFDC3  | 0.26956606 |
| WFDC5  | 0.27243733 |

|         |            |
|---------|------------|
| WFDC6B  | 0.88360095 |
| WFIKKN2 | 1.3953335  |
| WFS1    | 0.3215499  |
| WHRN    | 3.8222091  |
| WHSC1   | 0.52833176 |
| WHSC1L1 | 1.3141632  |
| WIF1    | 4.130321   |
| WIPF1   | 1.3039031  |
| WISP2   | 1.0205846  |
| WIZ     | 0.2993412  |
| WLS     | 1.3750687  |
| WNK1    | 1.1308789  |
| WNK2    | 0.934803   |
| WNK4    | 0.5881927  |
| WNT10A  | 0.8919096  |
| WNT10B  | 0.5206568  |
| WNT11   | 2.095677   |
| WNT16   | 1.5655906  |
| WNT4    | 0.51129866 |
| WNT6    | 0.6531849  |
| WNT7A   | 1.735275   |
| WNT7B   | 0.8504994  |
| WNT9A   | 1.9890513  |
| WSB1    | 1.2641435  |
| WSCD2   | 0.6734047  |
| WT1     | 2.504437   |
| WTAP    | 0.3204198  |
| WTIP    | 0.42737055 |
| WWC1    | 0.16136456 |
| WWC2    | 1.1069932  |
| WWP2    | 0.21008158 |
| WWTR1   | 1.2149286  |
| XAF1    | 1.3701954  |
| XBP1    | 0.36198902 |
| XDH     | 0.9333348  |
| XIRP1   | 1.6033027  |
| XIRP2   | 1.1169648  |
| XKRX    | 1.7130513  |
| XLR3B   | 0.6864872  |
| XLR4A   | 1.6997209  |
| XLR4B   | 1.9374895  |
| XPNPEP2 | 3.9902825  |
| XPO4    | 0.78653955 |
| XRN1    | 2.248176   |
| XRN2    | 0.20226717 |

|         |            |
|---------|------------|
| XXYLT1  | 0.81611514 |
| YARS    | 0.43349957 |
| YBX2    | 0.68529844 |
| YBX3    | 0.7626405  |
| YDJC    | 1.0016572  |
| YEATS4  | 3.9709744  |
| YIPF7   | 1.0361586  |
| YTHDC1  | 0.69573116 |
| YWHAZ   | 1.1666713  |
| YY2     | 1.1136713  |
| ZAK     | 2.0452528  |
| ZBED3   | 2.2662985  |
| ZBED4   | 0.19776297 |
| ZBED6   | 1.4466424  |
| ZBP1    | 0.4407215  |
| ZBTB10  | 1.053263   |
| ZBTB11  | 0.42812204 |
| ZBTB16  | 2.1508675  |
| ZBTB25  | 0.43397522 |
| ZBTB32  | 2.647694   |
| ZBTB34  | 0.7140894  |
| ZBTB37  | 0.6406729  |
| ZBTB38  | 0.55114317 |
| ZBTB4   | 0.5569725  |
| ZBTB41  | 0.6336031  |
| ZBTB42  | 0.2750764  |
| ZBTB46  | 0.4677055  |
| ZBTB5   | 0.22079182 |
| ZBTB6   | 1.7579634  |
| ZBTB7A  | 0.5267453  |
| ZC2HC1A | 2.2934294  |
| ZC3H10  | 0.24589062 |
| ZC3H12A | 3.1263032  |
| ZC3H12C | 1.701364   |
| ZC3H12D | 0.88859653 |
| ZC3H13  | 1.455728   |
| ZC3H3   | 0.20861816 |
| ZC3H6   | 0.764282   |
| ZC3H7A  | 0.6661229  |
| ZC3HAV1 | 0.51197577 |
| ZCCHC11 | 0.709929   |
| ZCCHC7  | 0.39358473 |
| ZDHHC1  | 1.8482943  |
| ZDHHC13 | 0.27572584 |
| ZDHHC17 | 0.59452105 |

|         |            |
|---------|------------|
| ZDHHC18 | 0.62430954 |
| ZDHHC21 | 0.43872547 |
| ZDHHC22 | 1.0819097  |
| ZDHHC23 | 0.72980356 |
| ZDHHC8  | 0.17523432 |
| ZEB1    | 1.3453436  |
| ZEB2    | 0.8336978  |
| ZEB2OS  | 0.85449624 |
| ZFAND2A | 0.582201   |
| ZFAND6  | 0.5633168  |
| ZFP1    | 0.9249358  |
| ZFP105  | 1.0940971  |
| ZFP106  | 0.67216635 |
| ZFP11   | 0.40250063 |
| ZFP12   | 0.50326085 |
| ZFP131  | 0.56457853 |
| ZFP142  | 0.74256706 |
| ZFP143  | 0.86297536 |
| ZFP146  | 1.0069818  |
| ZFP169  | 0.47219086 |
| ZFP182  | 0.929739   |
| ZFP184  | 0.8534837  |
| ZFP185  | 2.5833035  |
| ZFP202  | 0.4948938  |
| ZFP212  | 0.5321498  |
| ZFP217  | 0.7606778  |
| ZFP239  | 0.36626768 |
| ZFP251  | 0.9829178  |
| ZFP26   | 1.5125732  |
| ZFP263  | 0.2562251  |
| ZFP28   | 0.28803372 |
| ZFP280D | 0.750648   |
| ZFP281  | 1.1588788  |
| ZFP286  | 0.9780252  |
| ZFP287  | 1.2734344  |
| ZFP296  | 0.39063168 |
| ZFP317  | 0.9371135  |
| ZFP352  | 3.089064   |
| ZFP36   | 1.920269   |
| ZFP365  | 3.5651968  |
| ZFP366  | 1.8259213  |
| ZFP36L1 | 0.4963045  |
| ZFP382  | 0.72921133 |
| ZFP384  | 0.79071    |
| ZFP397  | 0.5030279  |

|        |            |
|--------|------------|
| ZFP407 | 0.3923831  |
| ZFP423 | 0.524842   |
| ZFP429 | 0.7859497  |
| ZFP445 | 1.0806966  |
| ZFP456 | 1.8766503  |
| ZFP46  | 1.4806318  |
| ZFP462 | 2.933673   |
| ZFP474 | 4.4731197  |
| ZFP503 | 0.89011526 |
| ZFP51  | 0.78241634 |
| ZFP512 | 0.4340191  |
| ZFP513 | 0.35448742 |
| ZFP52  | 3.4612894  |
| ZFP521 | 0.93327    |
| ZFP53  | 1.0028713  |
| ZFP532 | 0.8120353  |
| ZFP534 | 0.5323677  |
| ZFP536 | 1.2631211  |
| ZFP566 | 0.4870553  |
| ZFP568 | 0.43829775 |
| ZFP580 | 0.838294   |
| ZFP583 | 1.0661528  |
| ZFP592 | 0.20247364 |
| ZFP593 | 1.1299605  |
| ZFP597 | 0.92083406 |
| ZFP607 | 0.28413105 |
| ZFP608 | 1.7708673  |
| ZFP61  | 1.9253793  |
| ZFP62  | 1.4776325  |
| ZFP626 | 1.0036983  |
| ZFP641 | 2.4374561  |
| ZFP644 | 0.19955444 |
| ZFP651 | 0.77745247 |
| ZFP664 | 0.7261281  |
| ZFP668 | 0.34602928 |
| ZFP677 | 1.0841572  |
| ZFP687 | 0.26606798 |
| ZFP697 | 4.0698385  |
| ZFP7   | 1.2810206  |
| ZFP703 | 1.1672277  |
| ZFP704 | 0.7728708  |
| ZFP711 | 1.384073   |
| ZFP715 | 0.32961988 |
| ZFP719 | 1.0540423  |
| ZFP74  | 0.336905   |

|         |            |
|---------|------------|
| ZFP740  | 1.348144   |
| ZFP747  | 0.6256819  |
| ZFP758  | 1.1891451  |
| ZFP764  | 0.33605576 |
| ZFP781  | 0.5689521  |
| ZFP783  | 0.79073715 |
| ZFP790  | 3.5059762  |
| ZFP800  | 0.1828146  |
| ZFP819  | 0.9960823  |
| ZFP821  | 0.49571037 |
| ZFP839  | 1.0146282  |
| ZFP84   | 0.33334637 |
| ZFP850  | 1.933141   |
| ZFP865  | 0.48120975 |
| ZFP868  | 0.34739304 |
| ZFP9    | 0.9938257  |
| ZFP92   | 0.42525077 |
| ZFP945  | 0.5698061  |
| ZFP948  | 1.08775    |
| ZFP959  | 0.13657618 |
| ZFPM2   | 0.6526842  |
| ZFR2    | 0.46655512 |
| ZFX     | 0.240942   |
| ZFYVE16 | 0.705214   |
| ZFYVE20 | 0.39239693 |
| ZHX2    | 2.4287312  |
| ZKSCAN6 | 1.1036725  |
| ZMIZ1   | 1.9813447  |
| ZMYM2   | 0.28659868 |
| ZMYND10 | 1.727448   |
| ZMYND11 | 0.66260576 |
| ZMYND12 | 2.9460382  |
| ZMYND15 | 0.3753276  |
| ZNFX1   | 0.2348628  |
| ZNRF1   | 1.0356731  |
| ZRANB2  | 0.37111092 |
| ZRSR2   | 0.2922492  |
| ZSCAN18 | 2.0152798  |
| ZSCAN25 | 1.0893178  |
| ZSWIM4  | 0.71466017 |
| ZSWIM6  | 1.4442682  |
| ZSWIM8  | 0.39492702 |
| ZUFSP   | 0.33014393 |
| ZXDB    | 1.3857064  |
| ZYG11B  | 0.24231935 |

**Mice\_onset\_liver\_DEgenes\_fc**

| <b>Gene</b> | <b>Log2 Fold Change</b> |
|-------------|-------------------------|
| A26C2       | -1.7508829              |
| A3GALT2     | -2.017697               |
| A4GNT       | -7.7581644              |
| AADACL3     | -3.0964508              |
| AADAT       | -3.7811966              |
| ABCA12      | -7.2174435              |
| ABCA14      | -4.5211353              |
| ABCA16      | -3.8805795              |
| ABCB5       | -1.5646036              |
| ABCC12      | -3.6949248              |
| ABCG3       | -4.5412216              |
| ABHD11OS    | -2.1867795              |
| ABHD12B     | -2.0941937              |
| ABHD16B     | -2.7477543              |
| ABLIM2      | -2.836097               |
| ABT1        | -3.140681               |
| ACER1       | -4.498188               |
| ACHE        | -3.8119133              |
| ACKR4       | -4.2922435              |
| ACOT5       | -3.130099               |
| ACPT        | -6.079832               |
| ACR         | -4.0470543              |
| ACSBG2      | -5.6772847              |
| ACSL6       | -3.8674092              |
| ACSM2       | -2.6844282              |
| ACSM4       | -3.5163043              |
| ACTA1       | -3.139305               |
| ACTBL2      | -1.6212232              |
| ACTL10      | -2.526831               |
| ACTL11      | -3.3588636              |
| ACTL6B      | -4.0819383              |
| ACTL7B      | -6.299217               |
| ACTL9       | -3.0782325              |
| ACTR3B      | -0.9729364              |
| ACTRT2      | -3.7191534              |
| ACTRT3      | -2.416055               |
| ACYP2       | -2.0640123              |
| ADAD1       | -1.8344796              |
| ADAD2       | -3.2383819              |
| ADAM12      | -2.9575188              |
| ADAM18      | -4.356778               |
| ADAM1A      | -1.3719141              |
| ADAM1B      | -3.3723748              |



|          |            |
|----------|------------|
| ADAM2    | -3.5821834 |
| ADAM21   | -2.5229669 |
| ADAM24   | -3.8433323 |
| ADAM25   | -3.010058  |
| ADAM26A  | -3.7795339 |
| ADAM26B  | -2.180071  |
| ADAM30   | -3.5007176 |
| ADAM39   | -3.790896  |
| ADAM5    | -1.9344366 |
| ADAM6B   | -1.2890937 |
| ADAM7    | -1.8018007 |
| ADAMTS12 | -3.2154708 |
| ADAMTS16 | -4.6648207 |
| ADAMTS18 | -2.5895293 |
| ADAMTS20 | -1.7056932 |
| ADAMTS3  | -2.7157152 |
| ADAMTS6  | -1.5980968 |
| ADARB2   | -3.242807  |
| ADCY10   | -3.4994392 |
| ADD2     | -2.2961354 |
| ADH6A    | -2.417916  |
| ADM2     | -2.4244828 |
| ADPRHL1  | -2.2090704 |
| ADRA1A   | -2.6498404 |
| ADRA1D   | -4.1884193 |
| ADRA2B   | -2.696878  |
| ADRA2C   | -2.4359355 |
| ADRB3    | -1.924114  |
| AGBL4    | -4.8188596 |
| AGBL5    | -2.0513935 |
| AGTR2    | -4.05326   |
| AHNAK2   | -2.7368848 |
| AHRR     | -2.1827366 |
| AHSA2    | -1.9080956 |
| AICDA    | -3.602463  |
| AIPL1    | -2.5287971 |
| AIRE     | -3.2848554 |
| AKAP3    | -5.3092484 |
| AKAP6    | -1.7557709 |
| AKNAD1   | -5.3483276 |
| AKP3     | -2.2981849 |
| AKR1CL   | -2.5569031 |
| ALDH3B2  | -2.0213265 |
| ALDOART1 | -5.1838036 |
| ALDOART2 | -1.8022788 |

|          |            |
|----------|------------|
| ALK      | -2.8846917 |
| ALMS1    | -4.192436  |
| ALOX12B  | -3.9776797 |
| ALOX15   | -3.2607255 |
| ALPI     | -1.2997758 |
| ALPK2    | -5.328273  |
| ALPK3    | -2.7464626 |
| ALS2CR11 | -1.9146538 |
| ALX1     | -3.099661  |
| ALX3     | -1.514035  |
| AMBN     | -5.7621765 |
| AMELX    | -2.7582216 |
| AMH      | -1.1146886 |
| AMTN     | -3.6921806 |
| ANGEL1   | -1.9441271 |
| ANGPT4   | -4.3998337 |
| ANGPTL1  | -5.245061  |
| ANK2     | -1.8860672 |
| ANKDD1A  | -2.9494395 |
| ANKFN1   | -4.7282968 |
| ANKLE1   | -2.7826967 |
| ANKRD33  | -4.8061194 |
| ANKRD34A | -4.751786  |
| ANKRD36  | -6.4857025 |
| ANKRD42  | -2.2872682 |
| ANKRD55  | -3.7313375 |
| ANKRD6   | -4.924859  |
| ANKRD61  | -1.4563584 |
| ANKRD63  | -3.3800523 |
| ANKRD65  | -2.4451    |
| ANKRD7   | -4.16416   |
| ANKS1B   | -3.8107133 |
| ANKUB1   | -2.5476894 |
| ANO3     | -4.6560035 |
| ANO5     | -3.147168  |
| ANO7     | -5.0641212 |
| ANO8     | -1.8869224 |
| ANXA10   | -5.1538873 |
| ANXA13   | -2.647185  |
| AP1G2    | -1.6910486 |
| AP3B2    | -2.2545676 |
| AP4E1    | -1.1593411 |
| APBA2    | -2.541272  |
| APC      | -1.0080347 |
| APOL6    | -3.8623984 |

|            |            |
|------------|------------|
| APOL8      | -2.22733   |
| AQP12      | -2.7369282 |
| AQP2       | -1.376539  |
| AQP6       | -5.3415146 |
| ARHGAP19   | -2.4838123 |
| ARHGAP200! | -3.674704  |
| ARHGAP24   | -4.7649336 |
| ARHGAP27   | -3.337711  |
| ARHGAP330! | -4.333864  |
| ARHGAP36   | -1.4817772 |
| ARHGEF33   | -3.46566   |
| ARHGEF37   | -1.206023  |
| ARID3C     | -4.8859825 |
| ARL10      | -0.6690297 |
| ARL13A     | -3.9076629 |
| ARL14      | -3.2694337 |
| ARL14EPL   | -3.0800362 |
| ARL2       | -1.8065538 |
| ARMC12     | -6.0979967 |
| ARMC7      | -1.2245698 |
| ARMC9      | -2.3759248 |
| ARNT2      | -5.8301945 |
| ARPP21     | -4.4069185 |
| ARRDC5     | -5.1218023 |
| ARV1       | -1.207277  |
| ASB10      | -5.7739186 |
| ASB16      | -3.409896  |
| ASB17      | -1.775981  |
| ASB18      | -3.7287297 |
| ASB3       | -1.1226363 |
| ASB5       | -2.9188356 |
| ASB9       | -4.819237  |
| ASCL4      | -1.4759855 |
| ASIC1      | -5.826148  |
| ASIC2      | -3.033411  |
| ASIC4      | -2.6768837 |
| ASPHD1     | -1.8601224 |
| ASPHD2     | -2.485334  |
| ASTE1      | -2.9421396 |
| ASTL       | -3.2995336 |
| ASTN1      | -5.0313377 |
| ASTN2      | -5.4274864 |
| ASTX       | -5.561833  |
| ASXL3      | -3.3097925 |
| ASZ1       | -2.4295545 |

|          |            |
|----------|------------|
| ATAD2    | -1.4749348 |
| ATCAY    | -2.5552938 |
| ATCAYOS  | -2.1289034 |
| ATF7IP2  | -4.4478326 |
| ATG9B    | -4.059923  |
| ATOH7    | -3.0262628 |
| ATOH8    | -2.3694246 |
| ATP10B   | -3.0452907 |
| ATP12A   | -2.904962  |
| ATP13A5  | -3.982027  |
| ATP2B4   | -2.6220188 |
| ATP4A    | -1.3418269 |
| ATP4B    | -3.094856  |
| ATP6AP1L | -4.0513997 |
| ATP6V1B1 | -4.68404   |
| ATP6V1E2 | -3.101808  |
| ATP6V1G3 | -3.5421407 |
| ATP8A2   | -3.6615708 |
| ATP8B3   | -4.052718  |
| AU014756 | -5.593396  |
| AU015228 | -2.2332249 |
| AU015230 | -6.303293  |
| AU015558 | -5.841559  |
| AU015584 | -2.1469874 |
| AU015621 | -2.2290459 |
| AU015680 | -1.320179  |
| AU015723 | -1.6176634 |
| AU016102 | -3.500289  |
| AU017674 | -2.0188413 |
| AU018091 | -3.1141558 |
| AU018794 | -1.6106415 |
| AU019176 | -4.630427  |
| AU019990 | -3.2057652 |
| AU020094 | -1.9203842 |
| AU020951 | -3.6777394 |
| AU022434 | -3.8407633 |
| AU022751 | -4.7884245 |
| AU022934 | -3.7049098 |
| AU023617 | -2.3416905 |
| AU023639 | -6.167323  |
| AU023762 | -4.884445  |
| AU024180 | -3.805513  |
| AU024245 | -4.1719723 |
| AU040096 | -1.025276  |
| AU041480 | -1.2677233 |

|          |            |
|----------|------------|
| AU042410 | -5.348673  |
| AU042950 | -6.603118  |
| AU045094 | -1.8390398 |
| AU045717 | -2.1260986 |
| AU046084 | -5.394721  |
| AU067648 | -5.1901727 |
| AV320801 | -1.5475008 |
| AVIL     | -5.0728207 |
| AVP      | -1.8315935 |
| AVPR1B   | -4.2545    |
| AVPR2    | -7.141492  |
| AWAT2    | -2.9423094 |
| B3GALT2  | -1.1617026 |
| B3GALT5  | -4.231738  |
| B3GAT1   | -1.1261725 |
| B3GAT2   | -5.107932  |
| B3GNT3   | -4.9774923 |
| B3GNT7   | -2.9926047 |
| B3GNTL1  | -1.3592992 |
| B4GALNT3 | -2.5796876 |
| BAG2     | -2.5729024 |
| BAI1     | -5.4253025 |
| BAI3     | -4.409077  |
| BAIAP3   | -6.212347  |
| BAMBI    | -2.876198  |
| BANF2    | -3.3502836 |
| BANK1    | -2.0712264 |
| BARX1    | -3.2740455 |
| BARX2    | -1.2800431 |
| BAZ1B    | -1.3305564 |
| BBS7     | -1.126689  |
| BCAS1OS2 | -3.176046  |
| BCAS3    | -1.2062879 |
| BCAT1    | -3.6515594 |
| BCL11A   | -1.5728247 |
| BCL2L10  | -2.8137183 |
| BCORL1   | -0.7605329 |
| BECN2    | -1.802563  |
| BEND6    | -1.3720582 |
| BEST1    | -3.3738904 |
| BEST3    | -2.4792452 |
| BEX6     | -5.5972033 |
| BFSP2    | -1.5627167 |
| BGLAP    | -4.0419254 |
| BHLHA9   | -1.3330941 |

|          |            |
|----------|------------|
| BHLHB9   | -2.3007786 |
| BHLHE23  | -4.8839693 |
| BHLHE41  | -4.7559547 |
| BLK      | -2.7868466 |
| BMP8B    | -2.5619073 |
| BOLL     | -2.4285219 |
| BPI      | -3.9833171 |
| BPIFA2   | -4.030844  |
| BPIFA5   | -2.32556   |
| BPIFA6   | -5.2289686 |
| BPIFB2   | -2.6594253 |
| BPIFB3   | -1.8491735 |
| BPIFB4   | -2.5860145 |
| BPIFB6   | -3.7310832 |
| BPIFB9B  | -3.6939025 |
| BRICD5   | -3.4325275 |
| BRINP3   | -6.5619326 |
| BRS3     | -3.8334513 |
| BRSK2    | -3.6918695 |
| BSN      | -2.989301  |
| BSND     | -7.094059  |
| BSPH2    | -3.2546866 |
| BSX      | -4.9607344 |
| BTBD17   | -1.8183069 |
| BTBD8    | -2.8176436 |
| BTG4     | -4.0853357 |
| BTNL1    | -5.1924725 |
| BTNL4    | -1.3092256 |
| BTNL5-PS | -1.4884493 |
| BTNL6    | -2.4349809 |
| BTNL9    | -1.7562757 |
| BZRAP1   | -3.3650484 |
| C1QL2    | -4.62964   |
| C1QL4    | -6.0135293 |
| C1QTNF4  | -2.8030515 |
| C2CD4C   | -5.28119   |
| C2CD4D   | -2.7682319 |
| CABP1    | -2.9384158 |
| CABS1    | -1.5173285 |
| CACNA1A  | -1.0077746 |
| CACNA1B  | -4.131935  |
| CACNA1E  | -6.019102  |
| CACNA1F  | -1.6924078 |
| CACNA1G  | -1.390549  |
| CACNA1H  | -0.9916005 |

|          |            |
|----------|------------|
| CACNA1I  | -3.8124359 |
| CACNA1S  | -2.0476704 |
| CACNA2D3 | -2.3111706 |
| CACNB2   | -2.8924425 |
| CACNB4   | -3.3141844 |
| CACNG1   | -4.8669596 |
| CACNG2   | -3.5902338 |
| CACNG3   | -2.0575032 |
| CACNG4   | -4.232065  |
| CACNG6   | -2.3263326 |
| CACNG8   | -6.1158905 |
| CADM2    | -2.6507893 |
| CALB1    | -5.011591  |
| CALB2    | -6.812819  |
| CALCB    | -4.0827827 |
| CALCOCO2 | -3.616529  |
| CALCR    | -4.440233  |
| CALHM1   | -5.74175   |
| CALM4    | -4.1602473 |
| CALM5    | -2.3814256 |
| CAMKV    | -4.394308  |
| CAPN1    | -2.0615022 |
| CAPN12   | -1.8256695 |
| CAPN5    | -3.4202483 |
| CAPN6    | -1.6930592 |
| CAPN8    | -1.6533282 |
| CAPN9    | -2.7757812 |
| CAPZA3   | -3.0360448 |
| CAR1     | -1.9366577 |
| CAR10    | -2.8778317 |
| CAR6     | -6.0140724 |
| CARF     | -1.9680839 |
| CARLR    | -5.4962134 |
| CARTPT   | -3.0082207 |
| CASC5    | -2.105989  |
| CASKIN1  | -1.8707485 |
| CASP16   | -5.003069  |
| CASP3    | -2.448705  |
| CASQ1    | -3.4129405 |
| CASR     | -2.516424  |
| CASS4    | -3.859945  |
| CATIP    | -2.1150858 |
| CATSPER3 | -3.4191477 |
| CATSPER4 | -3.2078123 |
| CATSPERB | -4.754663  |

|           |            |
|-----------|------------|
| CATSPERG1 | -1.6928711 |
| CATSPERG2 | -1.7318006 |
| CBLN1     | -2.523894  |
| CBLN2     | -5.229104  |
| CBLN3     | -1.0636683 |
| CCDC105   | -3.952608  |
| CCDC110   | -4.064291  |
| CCDC114   | -0.6590965 |
| CCDC116   | -2.7164114 |
| CCDC122   | -2.1544328 |
| CCDC130   | -1.7274868 |
| CCDC14    | -4.390803  |
| CCDC142   | -2.3089187 |
| CCDC148   | -1.9409924 |
| CCDC152   | -5.436677  |
| CCDC154   | -1.6573956 |
| CCDC158   | -4.542261  |
| CCDC169   | -1.8126016 |
| CCDC172   | -2.8978646 |
| CCDC177   | -3.2036066 |
| CCDC178   | -1.2000799 |
| CCDC18    | -2.2356505 |
| CCDC183   | -4.044448  |
| CCDC185   | -5.232163  |
| CCDC24    | -3.165389  |
| CCDC27    | -8.398628  |
| CCDC42    | -2.2314446 |
| CCDC42OS  | -5.758211  |
| CCDC50    | -4.4911795 |
| CCDC54    | -3.2506814 |
| CCDC60    | -2.4762838 |
| CCDC62    | -3.3880954 |
| CCDC63    | -1.9270263 |
| CCDC7     | -3.2602448 |
| CCDC70    | -4.873865  |
| CCDC73    | -5.706081  |
| CCDC79    | -2.0004306 |
| CCDC8     | -4.3645897 |
| CCDC83    | -3.794846  |
| CCDC85B   | -3.2402377 |
| CCDC87    | -3.720035  |
| CCDC89    | -1.9951944 |
| CCK       | -3.3338437 |
| CCKBR     | -1.8523657 |
| CCL20     | -5.3968306 |



|          |            |
|----------|------------|
| CCL22    | -0.9622495 |
| CCL26    | -5.1104994 |
| CCNB1IP1 | -3.2324526 |
| CCNB3    | -3.2398362 |
| CCNE2    | -1.1812129 |
| CCNJL    | -1.2501154 |
| CCNY     | -0.8902319 |
| CCR3     | -3.5176468 |
| CCSER1   | -3.16009   |
| CCT8L1   | -3.3150783 |
| CD101    | -3.2137876 |
| CD180    | -2.5411339 |
| CD200R2  | -3.5823398 |
| CD209G   | -4.3163004 |
| CD22     | -1.4174984 |
| CD300A   | -1.672255  |
| CD300LB  | -1.2462232 |
| CD300LH  | -1.5159521 |
| CD40LG   | -4.909962  |
| CD59B    | -3.3219051 |
| CD70     | -0.9809594 |
| CDAN1    | -2.0677881 |
| CDC20B   | -4.042754  |
| CDC23    | -0.692652  |
| CDC45    | -1.6238687 |
| CDC7     | -3.2302318 |
| CDH10    | -5.486886  |
| CDH12    | -3.0741415 |
| CDH17    | -4.5898952 |
| CDH18    | -4.2845364 |
| CDH20    | -6.9300337 |
| CDH23    | -2.7860034 |
| CDH24    | -3.1923356 |
| CDH26    | -3.5107887 |
| CDH7     | -2.268508  |
| CDH8     | -3.289202  |
| CDH9     | -2.9740434 |
| CDHR1    | -2.8934247 |
| CDK1     | -1.6528392 |
| CDK15    | -2.7362716 |
| CDK19OS  | -4.9335737 |
| CDK5R2   | -5.10495   |
| CDKN2A   | -0.9768834 |
| CDNF     | -2.2312243 |
| CDRT4    | -3.1222684 |

|            |            |
|------------|------------|
| CDRT4OS1   | -3.838694  |
| CDSN       | -2.9483786 |
| CDX2       | -3.3991413 |
| CDX4       | -2.2653708 |
| CEACAM12   | -3.9985626 |
| CEACAM13   | -4.4734774 |
| CEACAM14   | -1.5630214 |
| CEACAM19   | -2.4277368 |
| CEACAM20   | -4.8941855 |
| CEACAM5    | -4.71708   |
| CEACAM9    | -3.4605281 |
| CEACAM-PS1 | -2.3559897 |
| CECR6      | -6.4820805 |
| CEL        | -2.3172815 |
| CELA1      | -4.185313  |
| CELA3B     | -4.016753  |
| CELF3      | -4.3716917 |
| CELF5      | -3.6897864 |
| CELF6      | -3.5674822 |
| CELRR      | -5.5233583 |
| CEMIP      | -3.7376754 |
| CEND1      | -2.5403671 |
| CENPI      | -4.170554  |
| CENPP      | -2.935065  |
| CEP135     | -1.8110356 |
| CEP57L1    | -3.1170812 |
| CEP78      | -2.581548  |
| CER1       | -4.6147313 |
| CERS3      | -4.8044415 |
| CES1H      | -2.0936267 |
| CES2H      | -4.612711  |
| CES4A      | -4.751436  |
| CES5A      | -4.571713  |
| CETN1      | -2.8665795 |
| CFC1       | -1.1757905 |
| CFTR       | -0.7845092 |
| CGA        | -2.5155766 |
| CHAF1A     | -2.1069639 |
| CHEK2      | -3.7863526 |
| CHIT1      | -3.003421  |
| CHODL      | -2.063883  |
| CHP2       | -2.2343843 |
| CHRD       | -1.5320399 |
| CHRD2      | -2.1931267 |
| CHRM1      | -2.5978332 |



|          |            |
|----------|------------|
| CLPSL2   | -1.933455  |
| CLRN1    | -4.467123  |
| CLRN2    | -5.048008  |
| CLRN3    | -4.9694567 |
| CLSTN3   | -1.1423106 |
| CLVS1    | -2.9127173 |
| CML5     | -2.9913268 |
| CMTM2A   | -2.3895886 |
| CMTM5    | -2.038147  |
| CNBD1    | -3.2710369 |
| CNDP1    | -4.8318605 |
| CNFN     | -1.9387574 |
| CNGA3    | -3.7343514 |
| CNGA4    | -1.918895  |
| CNGB1    | -1.7794008 |
| CNIH3    | -3.4263659 |
| CNNM1    | -3.097611  |
| CNPY1    | -4.086199  |
| CNTD1    | -2.5181284 |
| CNTN2    | -2.9128225 |
| CNTN3    | -2.0673535 |
| CNTN4    | -2.7646854 |
| CNTN5    | -7.53813   |
| CNTN6    | -2.215419  |
| CNTNAP2  | -3.7768445 |
| CNTNAP3  | -5.4758997 |
| CNTNAP5A | -5.7381115 |
| CNTNAP5B | -5.4810534 |
| CNTNAP5C | -2.7861934 |
| COCH     | -1.1952493 |
| COL10A1  | -3.9807904 |
| COL11A2  | -3.6839435 |
| COL15A1  | -2.327864  |
| COL19A1  | -2.2077203 |
| COL22A1  | -2.8135037 |
| COL24A1  | -3.441538  |
| COL25A1  | -5.4554777 |
| COL26A1  | -2.0484734 |
| COL28A1  | -3.1977162 |
| COL6A6   | -3.4874685 |
| COL8A1   | -2.386883  |
| COL9A1   | -5.2306433 |
| COL9A2   | -2.0323894 |
| COPG2OS2 | -4.204694  |
| COPS7B   | -0.6767805 |

|        |            |
|--------|------------|
| COQ3   | -2.19593   |
| CORT   | -1.7125015 |
| COX10  | -4.485511  |
| COX8C  | -2.8297021 |
| CPA1   | -3.6948    |
| CPA2   | -5.5349445 |
| CPA4   | -5.07251   |
| CPA5   | -2.902794  |
| CPLX3  | -4.037681  |
| CPLX4  | -3.9281442 |
| CPNE4  | -3.9913516 |
| CPNE6  | -2.7222593 |
| CPNE7  | -2.3362515 |
| CPSF4L | -3.7867591 |
| CPVL   | -4.1761885 |
| CPXCR1 | -2.4298742 |
| CPXM2  | -5.412303  |
| CRABP1 | -2.0423024 |
| CRB1   | -2.2458699 |
| CRB2   | -2.448843  |
| CRCT1  | -6.0771017 |
| CREG2  | -4.5998945 |
| CRH    | -4.982259  |
| CRHBP  | -5.934413  |
| CRHR1  | -1.9103832 |
| CRISP1 | -2.3050728 |
| CRISP2 | -2.2090232 |
| CRISP3 | -3.809449  |
| CRNN   | -5.905733  |
| CRTAC1 | -2.7698205 |
| CRX    | -1.3703177 |
| CRXOS  | -3.2341099 |
| CRYBA1 | -3.4480717 |
| CRYBA2 | -4.8583527 |
| CRYBB1 | -3.394464  |
| CRYBB2 | -4.100625  |
| CRYGB  | -5.894858  |
| CRYGC  | -5.72671   |
| CRYGD  | -1.8668482 |
| CRYGE  | -2.470307  |
| CRYGF  | -3.7024393 |
| CRYGN  | -2.13141   |
| CSDC2  | -2.1513855 |
| CSMD1  | -2.3506322 |
| CSMD2  | -5.2425594 |

|          |            |
|----------|------------|
| CSMD2OS  | -3.53895   |
| CSN1S2A  | -2.6157804 |
| CSN1S2B  | -4.19029   |
| CSN3     | -3.9191034 |
| CSNKA2IP | -1.9609652 |
| CST10    | -5.256765  |
| CST11    | -3.1028888 |
| CST12    | -5.035165  |
| CST13    | -2.338666  |
| CST6     | -2.5859268 |
| CSTAD    | -1.7579231 |
| CSTL1    | -4.1864095 |
| CTCFL    | -2.6708908 |
| CTF2     | -1.8370132 |
| CTHRC1   | -2.8919606 |
| CTNNA2   | -1.577733  |
| CTNNA3   | -2.66833   |
| CTRL     | -0.9415321 |
| CTS3     | -4.5734224 |
| CTS6     | -4.9927516 |
| CTS7     | -6.1256    |
| CTS8     | -1.9302351 |
| CTSM     | -1.5775535 |
| CTSQ     | -1.4090633 |
| CTTNBP2  | -2.1292062 |
| CTXN2    | -4.8507543 |
| CTXN3    | -1.3222365 |
| CUBN     | -3.1219702 |
| CUZD1    | -2.4677045 |
| CWH43    | -2.7246842 |
| CXXC4    | -2.8874865 |
| CYB5R2   | -4.1341076 |
| CYCT     | -5.5045576 |
| CYLC2    | -6.3389306 |
| CYP11A1  | -2.5175955 |
| CYP11B2  | -3.5317984 |
| CYP19A1  | -2.5254884 |
| CYP24A1  | -1.454447  |
| CYP26B1  | -4.651969  |
| CYP26C1  | -3.4344387 |
| CYP2AB1  | -3.1438034 |
| CYP2B23  | -3.7608173 |
| CYP2C65  | -3.0584462 |
| CYP2J11  | -4.2105193 |
| CYP2J9   | -1.6280842 |

|            |            |
|------------|------------|
| CYP4A29    | -6.328577  |
| CYP4A30B   | -2.5463834 |
| CYP4F39    | -2.4348598 |
| CYP4F40    | -4.331174  |
| CYP4F41-PS | -4.195306  |
| CYP4X1     | -5.2163754 |
| CYPT10     | -2.0066185 |
| CYPT12     | -5.7118874 |
| CYPT15     | -2.7324495 |
| CYPT2      | -3.3263156 |
| CYPT8      | -3.1737132 |
| CYPT9      | -2.3692296 |
| DAB1       | -1.670114  |
| DACH2      | -2.8798888 |
| DAO        | -4.418554  |
| DBHOS      | -4.889377  |
| DBIL5      | -2.7817564 |
| DBP        | -2.346736  |
| DBPHT2     | -1.0115166 |
| DBX2       | -3.1958256 |
| DCDC2A     | -2.586745  |
| DCDC2B     | -2.5060341 |
| DCDC2C     | -1.6042938 |
| DCLK1      | -1.8010266 |
| DCPP1      | -5.3880687 |
| DCST1      | -2.673536  |
| DCST2      | -2.6143754 |
| DCTD       | -3.4204118 |
| DCUN1D3    | -1.8191543 |
| DCX        | -3.176572  |
| DDI1       | -1.1389709 |
| DDIT4L     | -1.54674   |
| DDX11      | -1.9609847 |
| DEAR1      | -3.9125304 |
| DEFA1      | -6.246646  |
| DEFA10     | -6.2286377 |
| DEFA2      | -5.3009114 |
| DEFA21     | -4.509836  |
| DEFA23     | -7.524692  |
| DEFA25     | -6.616301  |
| DEFA26     | -5.0200205 |
| DEFA3      | -4.1984963 |
| DEFA-PS1   | -6.228673  |
| DEFA-PS13  | -2.5534618 |
| DEFA-RS1   | -4.536931  |

|           |            |
|-----------|------------|
| DEFA-RS12 | -2.7933235 |
| DEFA-RS2  | -1.1588836 |
| DEFA-RS4  | -1.3645506 |
| DEFA-RS7  | -1.8768275 |
| DEFB10    | -1.8107364 |
| DEFB13    | -5.899048  |
| DEFB14    | -4.906064  |
| DEFB18    | -6.281938  |
| DEFB19    | -3.8383884 |
| DEFB2     | -5.00808   |
| DEFB20    | -7.765526  |
| DEFB21    | -3.7193406 |
| DEFB22    | -5.3504972 |
| DEFB23    | -2.1373088 |
| DEFB26    | -4.5527515 |
| DEFB28    | -3.6976898 |
| DEFB29    | -3.444456  |
| DEFB30    | -3.8393946 |
| DEFB35    | -3.427053  |
| DEFB36    | -5.5332227 |
| DEFB38    | -4.2435255 |
| DEFB39    | -4.331663  |
| DEFB4     | -3.9947493 |
| DEFB40    | -4.291498  |
| DEFB41    | -5.0626793 |
| DEFB44-PS | -1.8366172 |
| DEFB45    | -2.124277  |
| DEFB46    | -4.37479   |
| DEFB47    | -4.085261  |
| DEFB48    | -4.8289747 |
| DEFB6     | -6.1686254 |
| DEFB7     | -6.437699  |
| DEFB9     | -4.151095  |
| DEGS2     | -2.3338013 |
| DEPDC5    | -1.1000576 |
| DFNB59    | -3.6771295 |
| DGKB      | -2.922951  |
| DGKI      | -2.8175712 |
| DGKK      | -6.1034184 |
| DHRS2     | -3.7866244 |
| DHX37     | -0.981859  |
| DIO3      | -2.125058  |
| DIO3OS    | -2.3099144 |
| DIRAS1    | -3.1907153 |
| DISP1     | -0.8699331 |



|          |            |
|----------|------------|
| DISP2    | -4.391842  |
| DIXDC1   | -4.2392325 |
| DKK1     | -1.4382823 |
| DKK4     | -5.769397  |
| DLEC1    | -1.4103565 |
| DLG2     | -2.6669405 |
| DLGAP2   | -1.6467083 |
| DLGAP3   | -1.6813412 |
| DLX1     | -2.1133378 |
| DLX5     | -5.8606873 |
| DLX6     | -6.7720695 |
| DLX6AS2  | -1.8609223 |
| DLX6OS1  | -4.4544106 |
| DMBT1    | -3.2599566 |
| DMC1     | -3.942582  |
| DMP1     | -2.402099  |
| DMRT1    | -1.9719753 |
| DMRT3    | -5.132558  |
| DMRTA1   | -1.1247587 |
| DMRTB1   | -3.861589  |
| DMRTC1B  | -2.498415  |
| DMRTC1C2 | -3.402088  |
| DNAH14   | -2.1874495 |
| DNAH17   | -4.106693  |
| DNAH3    | -1.2301905 |
| DNAJB7   | -2.2079358 |
| DNAJB8   | -4.7765265 |
| DNAJC5G  | -1.7226493 |
| DNAJC6   | -1.5760136 |
| DNASE1   | -5.420412  |
| DNER     | -1.7928929 |
| DNMBP    | -2.041287  |
| DNMT3AOS | -2.3234727 |
| DNMT3BOS | -1.8055279 |
| DOC2A    | -6.164473  |
| DOCK7    | -3.3705204 |
| DOK6     | -4.35983   |
| DOXL2    | -3.3006659 |
| DPF1     | -3.6167254 |
| DPPA2    | -2.2914562 |
| DPPA3    | -4.4237    |
| DPPA4    | -2.7622175 |
| DPYSL4   | -2.1521587 |
| DRAXIN   | -6.423621  |
| DRD1A    | -1.3661315 |

|         |            |
|---------|------------|
| DRD2    | -4.357682  |
| DRD3    | -5.1903048 |
| DRD4    | -4.1635923 |
| DRD5    | -2.5244217 |
| DRP2    | -3.2710772 |
| DSC1    | -2.4854608 |
| DSC3    | -4.059827  |
| DSCAM   | -4.0546746 |
| DSCAML1 | -2.0487912 |
| DSG1C   | -3.192582  |
| DSG3    | -3.456806  |
| DSG4    | -4.300971  |
| DSPP    | -6.1720715 |
| DTWD2   | -1.0935915 |
| DUOX1   | -2.668474  |
| DUPD1   | -6.8225527 |
| DUSP13  | -3.8603854 |
| DUSP15  | -4.1045046 |
| DUSP18  | -8.366945  |
| DUSP27  | -3.0667264 |
| DUX     | -1.2409832 |
| DUXBL1  | -4.1200366 |
| DUXBL2  | -3.8608687 |
| DYDC1   | -3.6417847 |
| DYNAP   | -4.2602625 |
| DYNC1I1 | -2.3342378 |
| DYRK4   | -4.7767806 |
| DYTN    | -4.5203934 |
| DZIP1L  | -4.436671  |
| EAR4    | -8.288403  |
| EBF3    | -1.2609916 |
| EBF4    | -2.4453166 |
| ECEL1   | -4.7359676 |
| EDA2R   | -1.3275678 |
| EDAR    | -3.921781  |
| EDARADD | -1.9112864 |
| EDDM3B  | -4.8012915 |
| EDN2    | -5.361759  |
| EDN3    | -3.1911175 |
| EEF2K   | -2.8362842 |
| EFCAB11 | -3.7470107 |
| EFCAB3  | -4.6708694 |
| EFCAB4B | -1.595099  |
| EFCAB7  | -3.5085444 |
| EFCAB8  | -3.3171172 |

|         |            |
|---------|------------|
| EFCAB9  | -6.7866755 |
| EFCC1   | -4.548435  |
| EFHD1   | -2.9580076 |
| EFNA2   | -2.6056006 |
| EFNA3   | -2.9595454 |
| EFNA4   | -1.2391798 |
| EGLN1   | -2.4779208 |
| EGR3    | -4.3297358 |
| EGR4    | -1.3557856 |
| EIF4E1B | -1.8398862 |
| ELAVL3  | -4.721821  |
| ELFN2   | -3.5602725 |
| ELL3    | -1.2083366 |
| ELMO1   | -3.7964077 |
| ELOVL4  | -2.3845751 |
| EMC10   | -2.100973  |
| EMILIN3 | -1.7043157 |
| EMX1    | -4.372904  |
| EMX2    | -2.3190784 |
| EMX2OS  | -3.5334647 |
| EN2     | -0.750931  |
| ENAM    | -3.8876534 |
| ENPP6   | -4.6246066 |
| ENPP7   | -2.01517   |
| ENTHD1  | -4.2766447 |
| EPB4.2  | -3.382096  |
| EPGN    | -1.7463081 |
| EPHA10  | -4.104055  |
| EPHA6   | -2.766456  |
| EPHX3   | -1.7443516 |
| EPO     | -4.5406704 |
| EPPIN   | -4.988168  |
| EPS8L2  | -3.2182102 |
| EPST11  | -3.0946147 |
| EPX     | -2.2255156 |
| EQTN    | -1.6066487 |
| ERAS    | -5.2096577 |
| ERBB3   | -0.6780746 |
| ERC1    | -1.149365  |
| ERICH6  | -1.4584887 |
| ERMAP   | -1.0334384 |
| ERN2    | -1.7259424 |
| ERV3    | -3.6589303 |
| ESP1    | -1.7441483 |
| ESP6    | -5.8843718 |

|             |            |
|-------------|------------|
| ESPN        | -2.931613  |
| ESPNL       | -0.8264735 |
| ESRRB       | -1.8232665 |
| ESRRG       | -1.5931587 |
| ETOHD2      | -0.9464438 |
| ETOH11      | -1.4741235 |
| ETV2        | -7.158449  |
| ETV3L       | -3.5415528 |
| EVC         | -3.1516542 |
| EVI2A-EVI2B | -1.2839074 |
| EXOC3L2     | -3.149057  |
| EXOC4       | -0.8835337 |
| EXOG        | -1.2161419 |
| EXT2        | -1.1076231 |
| EYA4        | -1.3999796 |
| F2RL2       | -1.0535429 |
| F2RL3       | -2.3809783 |
| F8A         | -4.0482597 |
| FABP6       | -4.794379  |
| FABP9       | -5.910386  |
| FADDOS      | -3.76435   |
| FAM115E     | -1.3737304 |
| FAM131B     | -5.1412387 |
| FAM131C     | -4.3671536 |
| FAM132B     | -4.0977683 |
| FAM135B     | -3.027444  |
| FAM154A     | -3.9969547 |
| FAM160A1    | -2.2993848 |
| FAM163B     | -5.5107183 |
| FAM166A     | -1.3309815 |
| FAM169A     | -2.2242181 |
| FAM170A     | -4.379751  |
| FAM171A2    | -4.054721  |
| FAM181A     | -4.528     |
| FAM184A     | -1.1573172 |
| FAM184B     | -3.0311332 |
| FAM187A     | -1.9525557 |
| FAM188B2    | -5.976037  |
| FAM196B     | -2.3096325 |
| FAM198A     | -3.0709653 |
| FAM19A4     | -1.4787669 |
| FAM19A5     | -1.9088626 |
| FAM209      | -1.5497174 |
| FAM217A     | -2.2140343 |
| FAM217B     | -1.964078  |

|           |            |
|-----------|------------|
| FAM219AOS | -4.4408455 |
| FAM221B   | -3.5957186 |
| FAM227A   | -4.6089854 |
| FAM227B   | -4.0656834 |
| FAM228A   | -1.6626489 |
| FAM228B   | -4.06659   |
| FAM24A    | -3.5914705 |
| FAM3B     | -2.2606776 |
| FAM46D    | -2.8682714 |
| FAM50B    | -3.8745768 |
| FAM57A    | -2.742374  |
| FAM57B    | -2.0960186 |
| FAM69C    | -2.504882  |
| FAM71A    | -3.9144151 |
| FAM71E2   | -4.765522  |
| FAM71F1   | -4.3594065 |
| FAM83B    | -2.2975047 |
| FAM83C    | -4.8761635 |
| FAN1      | -1.5124838 |
| FANCG     | -3.1622508 |
| FANCI     | -4.91901   |
| FAR2OS2   | -3.3212347 |
| FAT2      | -0.8987064 |
| FATE1     | -2.5563133 |
| FBLL1     | -7.5875535 |
| FBLN7     | -3.883827  |
| FBN2      | -2.94859   |
| FBP2      | -3.0116384 |
| FBXL2     | -1.1385605 |
| FBXL21    | -1.3511553 |
| FBXO16    | -2.653238  |
| FBXO39    | -3.3382776 |
| FBXO40    | -1.890919  |
| FBXO41    | -5.7716117 |
| FBXO43    | -5.7568464 |
| FBXO44    | -4.048739  |
| FBXO47    | -5.4022994 |
| FBXO48    | -3.6716182 |
| FBXW10    | -4.655546  |
| FBXW14    | -3.3931358 |
| FBXW15    | -2.7570815 |
| FBXW16    | -1.6392217 |
| FBXW18    | -2.9930644 |
| FBXW19    | -4.5439043 |
| FBXW20    | -1.6113856 |

|         |            |
|---------|------------|
| FBXW21  | -2.2289326 |
| FBXW22  | -3.037213  |
| FBXW26  | -4.5296383 |
| FBXW27  | -1.4889853 |
| FCAMR   | -3.2233617 |
| FCER2A  | -1.5521777 |
| FCNB    | -0.8550563 |
| FCRL1   | -1.2732265 |
| FCRL6   | -4.0035667 |
| FCRLB   | -3.8182683 |
| FER1L6  | -3.245083  |
| FERD3L  | -6.3352942 |
| FEV     | -2.738444  |
| FEZ1    | -3.6162505 |
| FFAR2   | -2.6874776 |
| FFAR3   | -0.8371663 |
| FGD1    | -2.8791611 |
| FGF13   | -2.2413974 |
| FGF14   | -3.622183  |
| FGF15   | -2.4129305 |
| FGF16   | -1.4395387 |
| FGF2    | -2.576109  |
| FGF20   | -4.917815  |
| FGF3    | -1.4344218 |
| FGF4    | -5.9047513 |
| FGF6    | -1.0400689 |
| FGF8    | -2.7719028 |
| FHIT    | -3.4539735 |
| FHL5    | -2.4470003 |
| FIGLA   | -4.9415035 |
| FKBP11  | -4.4383717 |
| FLG     | -4.00576   |
| FLG2    | -3.0886188 |
| FMN1    | -2.7893806 |
| FMNL1   | -4.316779  |
| FMO6    | -2.3251448 |
| FMO9    | -2.1853392 |
| FMR1NB  | -4.349582  |
| FND3C2  | -4.175272  |
| FNDC3C1 | -7.1435065 |
| FNDC9   | -2.4005823 |
| FOLR1   | -2.7037127 |
| FOLR4   | -0.7939684 |
| FOXB1   | -3.6084678 |
| FOXB2   | -6.4648356 |

|         |            |
|---------|------------|
| FOXD3   | -1.3796592 |
| FOXD4   | -3.4436805 |
| FOXE1   | -6.1881294 |
| FOXE3   | -1.6748383 |
| FOXG1   | -2.708455  |
| FOXH1   | -3.8677664 |
| FOXI1   | -1.9097517 |
| FOXI2   | -2.457476  |
| FOXI3   | -3.0012915 |
| FOXJ2   | -3.1550705 |
| FOXL1   | -3.3099284 |
| FOXL2OS | -3.3777628 |
| FOXN1   | -2.317119  |
| FOXO4   | -3.0437298 |
| FOXP2   | -2.2836266 |
| FOXR1   | -3.9673193 |
| FREM2   | -0.9466965 |
| FREM3   | -3.0302408 |
| FRMD3   | -2.5536623 |
| FRMD6   | -3.448892  |
| FRMD7   | -2.3038518 |
| FRMPD3  | -2.3037758 |
| FRRS1L  | -4.3402376 |
| FRS3OS  | -4.3273134 |
| FSBP    | -2.9383602 |
| FSCN2   | -2.5890617 |
| FSCN3   | -3.3838258 |
| FSD1    | -3.2220018 |
| FSD2    | -10.325954 |
| FSHB    | -5.0352783 |
| FSHR    | -4.3063    |
| FSIP1   | -2.3163457 |
| FSIP2   | -4.4635525 |
| FTHL17  | -2.4432738 |
| FTMT    | -3.2454772 |
| FTX     | -1.0633507 |
| FUT9    | -2.173056  |
| FV1     | -3.651067  |
| FXD2    | -2.303481  |
| FXD7    | -5.070912  |
| FZD5    | -3.0207152 |
| G6BOS   | -1.9392171 |
| G6PC2   | -5.9832325 |
| GAB2    | -3.664959  |
| GABRA1  | -1.9547961 |

|         |            |
|---------|------------|
| GABRA2  | -1.5220866 |
| GABRA3  | -2.1183453 |
| GABRB1  | -4.834883  |
| GABRB2  | -3.6497993 |
| GABRD   | -2.9266026 |
| GABRG1  | -7.626641  |
| GABRG2  | -3.3652341 |
| GABRG3  | -3.7827094 |
| GABRR3  | -3.994593  |
| GAD1    | -3.7204967 |
| GAD1OS  | -5.7397203 |
| GAD2    | -7.0373106 |
| GADL1   | -2.964863  |
| GAL     | -1.310132  |
| GAL3ST2 | -2.0298278 |
| GALNT13 | -3.0755773 |
| GALNT14 | -2.6657255 |
| GALNT5  | -5.459552  |
| GALNT9  | -1.7234323 |
| GALNTL5 | -2.7277074 |
| GALP    | -3.6396952 |
| GALR3   | -5.7415304 |
| GALT    | -1.0914662 |
| GAPDHS  | -1.5896101 |
| GAREML  | -4.8301306 |
| GAS1    | -1.3886452 |
| GAS2L2  | -5.494871  |
| GAS7    | -1.461515  |
| GAST    | -3.1152284 |
| GATA5OS | -2.510133  |
| GBGT1   | -4.117504  |
| GBX1    | -6.0631247 |
| GBX2    | -2.9663565 |
| GCAP8   | -3.82347   |
| GCG     | -3.4406917 |
| GCM2    | -4.8970356 |
| GCNT3   | -7.099262  |
| GCNT4   | -3.1730795 |
| GCNT7   | -0.9776223 |
| GDAP1   | -2.010913  |
| GDAP5   | -3.7437563 |
| GDF1    | -3.2839587 |
| GDF11   | -3.2652142 |
| GDF3    | -1.2671051 |
| GDF5    | -5.826496  |



|          |            |
|----------|------------|
| GDF6     | -4.6176777 |
| GDF7     | -4.3783336 |
| GDPD4    | -2.533965  |
| GEN1     | -1.9626741 |
| GFAP     | -3.6667275 |
| GFOD1    | -1.4687021 |
| GFRA3    | -2.2797375 |
| GFRAL    | -4.0035634 |
| GFY      | -4.013758  |
| GGT1     | -6.3308077 |
| GH       | -3.4749074 |
| GHRH     | -1.7082069 |
| GHRHR    | -2.9786975 |
| GIMAP1OS | -2.7393992 |
| GINS2    | -0.9410045 |
| GIP      | -6.4738493 |
| GIPC3    | -5.223678  |
| GIPR     | -5.1091824 |
| GJA10    | -1.8764403 |
| GJA3     | -4.838089  |
| GJA6     | -2.95549   |
| GJA8     | -3.1209078 |
| GJD2     | -4.8009577 |
| GJE1     | -1.9479885 |
| GK2      | -7.165703  |
| GLB1L3   | -2.8369668 |
| GLDN     | -3.208217  |
| GLDNOS   | -5.5968795 |
| GLI1     | -3.3219295 |
| GLI2     | -1.6690044 |
| GLIPR1L1 | -4.8732986 |
| GLIS1    | -1.4661787 |
| GLP1R    | -3.4629338 |
| GLRA1    | -2.4936557 |
| GLRA2    | -2.2168665 |
| GLRA4    | -6.284828  |
| GLRB     | -4.740969  |
| GLRP1    | -2.1093931 |
| GLT6D1   | -3.1048903 |
| GLYATL3  | -5.834057  |
| GLYCAM1  | -5.83482   |
| GM10007  | -1.960135  |
| GM10023  | -1.8975909 |
| GM10024  | -4.4893093 |
| GM10069  | -6.553505  |

|         |            |
|---------|------------|
| GM10071 | -4.018426  |
| GM10081 | -4.2136993 |
| GM10113 | -3.9171464 |
| GM10125 | -2.9776084 |
| GM10143 | -1.6251774 |
| GM10158 | -2.4553754 |
| GM10165 | -1.995347  |
| GM10190 | -1.2947185 |
| GM10199 | -4.3191814 |
| GM10209 | -2.762049  |
| GM10220 | -5.12807   |
| GM10229 | -3.385319  |
| GM10265 | -2.7811537 |
| GM10266 | -2.887699  |
| GM10276 | -3.3392348 |
| GM10278 | -5.37289   |
| GM10286 | -2.7870636 |
| GM10287 | -2.801547  |
| GM10334 | -2.019175  |
| GM10369 | -3.8875968 |
| GM10370 | -5.6997757 |
| GM10371 | -1.6370134 |
| GM10372 | -5.1682215 |
| GM10373 | -4.1295195 |
| GM10375 | -5.2374    |
| GM10385 | -2.9834828 |
| GM10389 | -2.5696414 |
| GM10403 | -5.2980614 |
| GM10408 | -3.9432724 |
| GM10413 | -3.147041  |
| GM10415 | -4.543681  |
| GM10419 | -4.0295076 |
| GM10421 | -1.9440131 |
| GM10426 | -1.5350404 |
| GM10428 | -1.6313205 |
| GM1043  | -4.949793  |
| GM10431 | -6.652645  |
| GM10432 | -4.813204  |
| GM10435 | -0.7701559 |
| GM10437 | -3.5185084 |
| GM10439 | -2.37968   |
| GM10440 | -4.5341415 |
| GM10441 | -2.9568923 |
| GM10445 | -1.8464396 |
| GM10450 | -4.015571  |

|         |            |
|---------|------------|
| GM10457 | -1.9792099 |
| GM10465 | -5.456974  |
| GM10469 | -4.6156588 |
| GM10471 | -3.4892795 |
| GM10474 | -3.4061894 |
| GM10475 | -3.939812  |
| GM10482 | -4.0965204 |
| GM10487 | -1.6163783 |
| GM10489 | -4.311122  |
| GM10493 | -2.4476123 |
| GM10498 | -5.3928022 |
| GM10501 | -4.041031  |
| GM10503 | -6.046542  |
| GM10510 | -2.7286549 |
| GM10512 | -3.9402497 |
| GM10513 | -4.7292037 |
| GM10516 | -4.1218095 |
| GM10531 | -5.9520016 |
| GM10532 | -2.72777   |
| GM10535 | -3.3428485 |
| GM10536 | -7.214511  |
| GM10537 | -2.9901812 |
| GM10538 | -5.3884683 |
| GM10544 | -1.9664552 |
| GM10548 | -4.8947215 |
| GM10555 | -2.3728054 |
| GM10560 | -3.6117725 |
| GM10561 | -4.669379  |
| GM10568 | -2.6701424 |
| GM10572 | -3.1300416 |
| GM10578 | -2.2033727 |
| GM10579 | -3.9220605 |
| GM10584 | -5.1034207 |
| GM10588 | -3.5993109 |
| GM10603 | -3.05697   |
| GM10609 | -2.5218766 |
| GM10614 | -3.6554463 |
| GM10616 | -2.3917964 |
| GM10618 | -1.2660906 |
| GM10620 | -1.558986  |
| GM10623 | -3.642943  |
| GM10624 | -3.2030566 |
| GM10632 | -1.2058372 |
| GM10637 | -2.9397297 |
| GM10651 | -2.2699966 |

|         |            |
|---------|------------|
| GM10673 | -0.8409939 |
| GM10674 | -5.1707354 |
| GM10677 | -3.279762  |
| GM10682 | -3.1209333 |
| GM10683 | -3.1115055 |
| GM10684 | -3.2964313 |
| GM10687 | -4.350784  |
| GM10688 | -4.9837503 |
| GM10690 | -3.0405173 |
| GM10701 | -3.565334  |
| GM10703 | -1.409776  |
| GM10706 | -4.322626  |
| GM10714 | -3.9139721 |
| GM10723 | -2.1636178 |
| GM10724 | -3.5978951 |
| GM10727 | -3.2406971 |
| GM10732 | -3.8830779 |
| GM10739 | -1.261558  |
| GM10741 | -5.222952  |
| GM10744 | -4.70949   |
| GM10745 | -3.0556514 |
| GM10747 | -5.7134857 |
| GM10752 | -5.152336  |
| GM10754 | -4.817847  |
| GM10755 | -2.5390978 |
| GM10757 | -3.443757  |
| GM10759 | -2.8663137 |
| GM10764 | -1.8412676 |
| GM10773 | -2.543113  |
| GM10779 | -5.0963016 |
| GM10781 | -3.5494914 |
| GM10782 | -3.1203718 |
| GM10787 | -3.9527173 |
| GM10789 | -4.2965164 |
| GM10790 | -2.3537858 |
| GM10802 | -6.324935  |
| GM10804 | -4.352523  |
| GM10814 | -3.5295649 |
| GM10815 | -4.2032146 |
| GM10817 | -4.7923207 |
| GM10822 | -2.4434144 |
| GM10823 | -2.9240227 |
| GM10826 | -3.1284409 |
| GM10830 | -3.2888696 |
| GM10831 | -3.1851156 |

|         |            |
|---------|------------|
| GM10835 | -3.2203295 |
| GM10836 | -5.7204847 |
| GM10844 | -4.0270076 |
| GM10846 | -2.3611715 |
| GM10848 | -1.2269735 |
| GM10857 | -4.996564  |
| GM10860 | -2.78358   |
| GM10863 | -3.2531953 |
| GM10864 | -3.7541342 |
| GM10867 | -5.597349  |
| GM10869 | -1.6808119 |
| GM10873 | -1.8197196 |
| GM10876 | -2.5540693 |
| GM10926 | -5.6006584 |
| GM10933 | -2.4133663 |
| GM1096  | -3.662611  |
| GM1110  | -1.5695963 |
| GM11128 | -2.2141142 |
| GM11149 | -2.1700537 |
| GM11159 | -2.6318946 |
| GM11237 | -2.3685722 |
| GM11266 | -3.4983368 |
| GM11381 | -4.201885  |
| GM11468 | -4.7523484 |
| GM11492 | -1.0458896 |
| GM11497 | -2.9814415 |
| GM11529 | -3.528121  |
| GM11541 | -6.252399  |
| GM11543 | -4.3305645 |
| GM11544 | -2.1305556 |
| GM11546 | -3.5437062 |
| GM11554 | -2.922224  |
| GM11563 | -2.05876   |
| GM11568 | -1.9164138 |
| GM11570 | -2.2510734 |
| GM11595 | -2.0156567 |
| GM11634 | -2.6992946 |
| GM11677 | -1.2560132 |
| GM11681 | -2.6501637 |
| GM11691 | -5.4440527 |
| GM11710 | -1.3243926 |
| GM11735 | -6.0147963 |
| GM11747 | -1.0283442 |
| GM11757 | -2.5031204 |
| GM11780 | -1.6567667 |

|         |            |
|---------|------------|
| GM11938 | -2.7889473 |
| GM11961 | -1.1093202 |
| GM12    | -1.4892173 |
| GM12000 | -3.3200767 |
| GM12052 | -1.4008899 |
| GM12059 | -4.0016174 |
| GM12108 | -3.0964317 |
| GM12128 | -4.8332515 |
| GM12169 | -1.4593747 |
| GM12171 | -2.2349677 |
| GM12253 | -1.7496672 |
| GM12258 | -4.388034  |
| GM12273 | -4.451142  |
| GM12298 | -1.5137358 |
| GM12302 | -2.2283287 |
| GM12349 | -2.1635628 |
| GM12359 | -1.9147077 |
| GM12371 | -3.9142807 |
| GM12408 | -4.4949408 |
| GM12409 | -2.9486613 |
| GM12472 | -4.293893  |
| GM12474 | -2.0691156 |
| GM12511 | -3.330959  |
| GM12542 | -4.9969883 |
| GM12568 | -1.972585  |
| GM12580 | -4.6451626 |
| GM12633 | -3.7780612 |
| GM12680 | -1.3472543 |
| GM12695 | -9.486035  |
| GM12789 | -4.1703835 |
| GM12790 | -5.094413  |
| GM12794 | -4.2278004 |
| GM12830 | -2.8018913 |
| GM12863 | -4.1270747 |
| GM12866 | -2.7989664 |
| GM12886 | -3.2762523 |
| GM12888 | -4.964997  |
| GM12992 | -2.941951  |
| GM13011 | -3.0043018 |
| GM13032 | -4.1276064 |
| GM13051 | -4.292367  |
| GM13078 | -1.8022599 |
| GM13084 | -2.7829251 |
| GM13088 | -3.465682  |
| GM13112 | -4.2434235 |

|         |            |
|---------|------------|
| GM13119 | -4.9660497 |
| GM13124 | -4.8317814 |
| GM13125 | -3.4208388 |
| GM13128 | -4.077855  |
| GM13152 | -3.4898753 |
| GM13205 | -5.171689  |
| GM13219 | -3.2669463 |
| GM1322  | -5.8876095 |
| GM13247 | -1.952807  |
| GM13275 | -2.8608902 |
| GM13372 | -3.962556  |
| GM13375 | -3.2669284 |
| GM13391 | -2.262538  |
| GM13403 | -5.266036  |
| GM13420 | -1.7750506 |
| GM13429 | -3.3533864 |
| GM13446 | -4.950182  |
| GM13490 | -3.0593226 |
| GM13498 | -1.9624314 |
| GM13522 | -1.666208  |
| GM136   | -3.3245854 |
| GM13629 | -1.4914782 |
| GM13710 | -3.0131104 |
| GM13769 | -4.0513773 |
| GM13807 | -5.452168  |
| GM13939 | -1.7984138 |
| GM14025 | -1.9979064 |
| GM14085 | -1.6221027 |
| GM14092 | -4.8594    |
| GM14124 | -1.6908267 |
| GM14129 | -4.0775213 |
| GM14149 | -3.2971365 |
| GM14164 | -4.069101  |
| GM14243 | -5.4256816 |
| GM14317 | -3.1961179 |
| GM14340 | -2.8142836 |
| GM14461 | -3.5990736 |
| GM14483 | -4.4919586 |
| GM14484 | -2.5564337 |
| GM14486 | -4.467004  |
| GM14488 | -2.7587452 |
| GM14496 | -4.106476  |
| GM14499 | -4.2966795 |
| GM14634 | -3.3450418 |
| GM14725 | -3.5252352 |

|         |            |
|---------|------------|
| GM14743 | -2.5516608 |
| GM14762 | -1.3213811 |
| GM14851 | -8.741274  |
| GM14920 | -4.95957   |
| GM15023 | -5.8333983 |
| GM15085 | -2.5632908 |
| GM15104 | -4.78306   |
| GM15130 | -3.2762086 |
| GM15217 | -1.5135441 |
| GM15232 | -2.058841  |
| GM1527  | -5.2920737 |
| GM15292 | -3.5421236 |
| GM15299 | -6.8341055 |
| GM15401 | -2.8530717 |
| GM15411 | -4.5224886 |
| GM15412 | -4.8444843 |
| GM15413 | -3.957052  |
| GM15417 | -1.9415472 |
| GM15441 | -3.4182029 |
| GM15478 | -4.2037354 |
| GM15482 | -2.1972752 |
| GM15498 | -9.008722  |
| GM15506 | -2.9305727 |
| GM15514 | -5.290999  |
| GM1553  | -2.4811535 |
| GM156   | -2.980731  |
| GM15612 | -4.743779  |
| GM15628 | -3.6602921 |
| GM1564  | -2.8104568 |
| GM15762 | -4.2292356 |
| GM15821 | -1.1706266 |
| GM15850 | -1.509016  |
| GM1587  | -2.2828941 |
| GM1604B | -1.9274435 |
| GM1631  | -3.0381565 |
| GM16367 | -1.7607527 |
| GM16390 | -2.711967  |
| GM16428 | -5.520916  |
| GM16441 | -1.6954715 |
| GM16462 | -5.043065  |
| GM16486 | -2.9689405 |
| GM16488 | -4.9278173 |
| GM16489 | -3.9628043 |
| GM16491 | -2.0787203 |
| GM16497 | -3.3365543 |



|         |            |
|---------|------------|
| GM16498 | -4.6011662 |
| GM16499 | -3.213019  |
| GM16505 | -2.269846  |
| GM16508 | -3.253023  |
| GM16527 | -4.339819  |
| GM16532 | -5.201141  |
| GM16686 | -2.941895  |
| GM16863 | -3.4157956 |
| GM16982 | -2.5655372 |
| GM17727 | -6.0651617 |
| GM17767 | -4.266345  |
| GM17769 | -3.5165372 |
| GM17783 | -5.157304  |
| GM19410 | -5.058082  |
| GM1965  | -2.4217043 |
| GM1968  | -4.155869  |
| GM1971  | -1.9093976 |
| GM1993  | -4.4894586 |
| GM2002  | -1.4536445 |
| GM2022  | -2.555053  |
| GM2027  | -4.5391893 |
| GM2042  | -3.967278  |
| GM20554 | -1.0231619 |
| GM20604 | -3.521248  |
| GM20611 | -2.3098197 |
| GM20740 | -4.0576496 |
| GM20747 | -5.3367577 |
| GM20754 | -3.0020916 |
| GM20758 | -2.4067416 |
| GM20783 | -1.38766   |
| GM20806 | -4.6751194 |
| GM20837 | -6.649642  |
| GM20865 | -2.8241155 |
| GM20867 | -3.1210997 |
| GM20877 | -4.3303165 |
| GM2090  | -4.1967697 |
| GM21064 | -1.3443532 |
| GM21276 | -2.9966168 |
| GM21292 | -3.364309  |
| GM2137  | -3.2348123 |
| GM21404 | -1.6364667 |
| GM21464 | -5.949211  |
| GM21498 | -2.0327225 |
| GM2155  | -1.329993  |
| GM21637 | -4.2288465 |

|         |            |
|---------|------------|
| GM2164  | -3.352046  |
| GM2176  | -1.7602069 |
| GM21951 | -4.3948526 |
| GM22    | -0.7229285 |
| GM2233  | -3.6349182 |
| GM2238  | -2.5654066 |
| GM2240  | -5.0763893 |
| GM2287  | -3.1437726 |
| GM2483  | -3.5806708 |
| GM2491  | -5.287259  |
| GM2545  | -2.6537085 |
| GM2560  | -2.8221889 |
| GM2582  | -2.4272735 |
| GM266   | -2.74516   |
| GM2670  | -5.316619  |
| GM2675  | -3.4456036 |
| GM2693  | -2.2028325 |
| GM2694  | -1.0351171 |
| GM2716  | -3.7717192 |
| GM2795  | -1.8471215 |
| GM2800  | -4.7006836 |
| GM2824  | -0.862725  |
| GM2837  | -2.1062617 |
| GM2927  | -5.1912065 |
| GM2990  | -5.994297  |
| GM3002  | -6.4989176 |
| GM3032  | -2.3619323 |
| GM3045  | -3.0220127 |
| GM3052  | -2.6988337 |
| GM3081  | -1.962044  |
| GM3086  | -2.808846  |
| GM3143  | -3.0101802 |
| GM318   | -2.8331606 |
| GM3227  | -4.0275316 |
| GM3230  | -5.262446  |
| GM3234  | -1.4643676 |
| GM3238  | -3.1146624 |
| GM3264  | -2.6496687 |
| GM3279  | -1.9309146 |
| GM3300  | -1.1270769 |
| GM3317  | -3.1375365 |
| GM3325  | -1.9249976 |
| GM3331  | -2.4986598 |
| GM3336  | -5.9726753 |
| GM3428  | -3.7967272 |

|        |            |
|--------|------------|
| GM3453 | -3.2697246 |
| GM3470 | -2.5068662 |
| GM3509 | -3.7391524 |
| GM3510 | -4.3149796 |
| GM3519 | -1.4970384 |
| GM355  | -4.919246  |
| GM3561 | -2.0073104 |
| GM3596 | -4.344055  |
| GM3598 | -5.1591244 |
| GM362  | -5.0896044 |
| GM3625 | -2.1710868 |
| GM364  | -3.9493673 |
| GM3646 | -4.3178673 |
| GM3669 | -4.4468436 |
| GM3696 | -1.762136  |
| GM3718 | -2.3237538 |
| GM3740 | -4.100268  |
| GM3763 | -5.2002544 |
| GM3772 | -2.788282  |
| GM3775 | -3.5781286 |
| GM3807 | -2.357412  |
| GM382  | -5.4286785 |
| GM3831 | -3.1209774 |
| GM3858 | -2.8325906 |
| GM3871 | -1.5380261 |
| GM3877 | -2.820966  |
| GM3881 | -3.5118082 |
| GM3896 | -0.7906258 |
| GM3907 | -2.6109302 |
| GM3916 | -0.685097  |
| GM3942 | -2.8200865 |
| GM3952 | -2.074495  |
| GM3961 | -5.1811705 |
| GM3970 | -1.8934498 |
| GM3985 | -5.5060344 |
| GM4022 | -2.997722  |
| GM4035 | -2.3110096 |
| GM4081 | -3.1606429 |
| GM4131 | -5.8319464 |
| GM4132 | -2.2640805 |
| GM4151 | -6.395089  |
| GM4200 | -1.5416319 |
| GM4201 | -5.776016  |
| GM4203 | -5.7059937 |
| GM4208 | -3.220603  |

|        |            |
|--------|------------|
| GM4211 | -5.7689285 |
| GM4221 | -1.7803364 |
| GM4224 | -5.4408693 |
| GM4230 | -3.162068  |
| GM4241 | -2.760814  |
| GM4251 | -2.1386533 |
| GM4278 | -4.364106  |
| GM4279 | -3.6154268 |
| GM4297 | -3.2829235 |
| GM4311 | -1.9627421 |
| GM4312 | -3.0653048 |
| GM4319 | -2.434168  |
| GM4340 | -1.036411  |
| GM4354 | -2.3624032 |
| GM436  | -2.2511644 |
| GM4371 | -4.140049  |
| GM438  | -4.136548  |
| GM4419 | -4.572242  |
| GM4430 | -1.103893  |
| GM4432 | -5.5261574 |
| GM4454 | -4.5605116 |
| GM4461 | -1.78898   |
| GM4466 | -3.7293048 |
| GM4489 | -7.343181  |
| GM4491 | -2.030775  |
| GM4532 | -1.9801087 |
| GM4566 | -3.4403853 |
| GM4567 | -5.39943   |
| GM4593 | -0.9751401 |
| GM4598 | -6.7401266 |
| GM46   | -2.1247003 |
| GM4606 | -2.1385484 |
| GM4632 | -2.3741913 |
| GM4657 | -4.6751966 |
| GM4665 | -4.8558817 |
| GM4668 | -1.3428254 |
| GM4719 | -2.3561306 |
| GM4736 | -4.103694  |
| GM4745 | -6.4317083 |
| GM4755 | -6.548071  |
| GM4758 | -2.6481488 |
| GM4763 | -3.8333256 |
| GM4776 | -4.7895293 |
| GM4791 | -3.8415961 |
| GM4792 | -5.077054  |

|        |            |
|--------|------------|
| GM4814 | -1.0291874 |
| GM4827 | -2.2891254 |
| GM4850 | -2.3551834 |
| GM4868 | -7.0875816 |
| GM4872 | -6.420953  |
| GM4906 | -0.98805   |
| GM4922 | -3.6758633 |
| GM4937 | -2.9219174 |
| GM4975 | -4.543335  |
| GM4981 | -2.745389  |
| GM4994 | -5.5120544 |
| GM5065 | -2.4084272 |
| GM5082 | -1.4566424 |
| GM5083 | -4.061184  |
| GM5084 | -4.4737387 |
| GM5086 | -2.388517  |
| GM5087 | -1.5191171 |
| GM5089 | -1.9556704 |
| GM5091 | -2.7414079 |
| GM5094 | -3.3578172 |
| GM5095 | -3.1189516 |
| GM5099 | -3.4375467 |
| GM5105 | -1.7083774 |
| GM5106 | -1.9714289 |
| GM5108 | -4.559951  |
| GM5111 | -1.1239297 |
| GM5118 | -3.645193  |
| GM5122 | -5.183969  |
| GM5124 | -5.8686833 |
| GM5127 | -6.412524  |
| GM5129 | -3.1229453 |
| GM5134 | -6.780183  |
| GM5144 | -4.181238  |
| GM5148 | -2.9588082 |
| GM5155 | -4.529773  |
| GM5166 | -3.6177444 |
| GM5174 | -4.163549  |
| GM5215 | -1.1742916 |
| GM5258 | -2.9600098 |
| GM5294 | -4.258573  |
| GM5296 | -1.9627197 |
| GM53   | -5.883404  |
| GM5331 | -3.4702854 |
| GM5334 | -4.155544  |
| GM534  | -2.6262276 |

|        |            |
|--------|------------|
| GM5346 | -2.604248  |
| GM536  | -4.3070827 |
| GM5409 | -2.9482815 |
| GM5415 | -3.0595734 |
| GM5420 | -2.0159352 |
| GM5434 | -2.404111  |
| GM5441 | -1.934272  |
| GM5447 | -3.466525  |
| GM5458 | -2.8181608 |
| GM5460 | -2.3148904 |
| GM5468 | -5.198654  |
| GM5475 | -1.2023327 |
| GM5476 | -5.3070865 |
| GM5477 | -4.600315  |
| GM5485 | -4.413928  |
| GM5493 | -3.8175044 |
| GM550  | -6.4243073 |
| GM553  | -6.2738686 |
| GM5532 | -6.457628  |
| GM5535 | -2.8557763 |
| GM5538 | -2.9123337 |
| GM5553 | -1.4640393 |
| GM5563 | -6.1654644 |
| GM5570 | -3.4846795 |
| GM5585 | -2.7361202 |
| GM5589 | -4.3512344 |
| GM5590 | -2.202419  |
| GM5591 | -3.7716231 |
| GM5592 | -2.3861804 |
| GM5600 | -2.9189727 |
| GM5606 | -6.423518  |
| GM5607 | -4.0513067 |
| GM5608 | -2.0354455 |
| GM5615 | -2.8339367 |
| GM5622 | -3.7644358 |
| GM5627 | -5.4101143 |
| GM5635 | -2.7014446 |
| GM5636 | -3.7330227 |
| GM5665 | -1.8556783 |
| GM567  | -2.2318397 |
| GM568  | -4.9025464 |
| GM5709 | -3.1493328 |
| GM572  | -4.724631  |
| GM5724 | -2.960693  |
| GM5737 | -0.9118607 |

|        |            |
|--------|------------|
| GM5751 | -1.9033835 |
| GM5755 | -1.91379   |
| GM5771 | -3.4282405 |
| GM5796 | -2.3192203 |
| GM5800 | -4.544648  |
| GM5820 | -2.7580044 |
| GM5849 | -1.803539  |
| GM5860 | -5.472963  |
| GM5862 | -2.3804343 |
| GM5868 | -4.140953  |
| GM5893 | -3.6362605 |
| GM590  | -4.4914575 |
| GM5901 | -2.050389  |
| GM5907 | -2.073978  |
| GM5916 | -4.1551332 |
| GM5922 | -1.1259053 |
| GM5925 | -3.6266406 |
| GM5932 | -1.8202174 |
| GM5934 | -2.2634466 |
| GM5938 | -3.946476  |
| GM595  | -4.345859  |
| GM5953 | -4.420869  |
| GM5958 | -3.5542336 |
| GM597  | -2.8160777 |
| GM6040 | -2.870884  |
| GM6042 | -3.90216   |
| GM6086 | -2.4139845 |
| GM6093 | -3.4924488 |
| GM6117 | -6.99099   |
| GM614  | -1.8213613 |
| GM6145 | -3.9092312 |
| GM6150 | -2.9053006 |
| GM6219 | -4.0925207 |
| GM6225 | -2.3135805 |
| GM6249 | -1.6368957 |
| GM6260 | -3.6268196 |
| GM6268 | -3.3571959 |
| GM6277 | -3.004029  |
| GM6287 | -3.4873047 |
| GM6288 | -2.2201412 |
| GM6289 | -4.3091187 |
| GM6307 | -5.722182  |
| GM6329 | -2.7748814 |
| GM6360 | -3.6555865 |
| GM6370 | -3.578156  |

|        |            |
|--------|------------|
| GM6406 | -2.3505726 |
| GM6416 | -3.9296625 |
| GM6436 | -1.8651576 |
| GM6460 | -2.5649562 |
| GM6471 | -3.3923967 |
| GM6537 | -3.682403  |
| GM6556 | -3.3075402 |
| GM6559 | -2.6374598 |
| GM6566 | -4.5533266 |
| GM6590 | -4.33539   |
| GM6600 | -3.2734542 |
| GM6602 | -2.5033607 |
| GM6614 | -6.7486477 |
| GM6639 | -4.7439966 |
| GM6653 | -3.2585971 |
| GM6713 | -3.764016  |
| GM6729 | -1.3617623 |
| GM6760 | -4.9016438 |
| GM6787 | -4.894424  |
| GM6792 | -3.0420237 |
| GM6818 | -6.032345  |
| GM6846 | -3.114413  |
| GM6890 | -2.32112   |
| GM6927 | -3.9173322 |
| GM6936 | -1.9113142 |
| GM694  | -5.5865135 |
| GM6943 | -4.7352333 |
| GM6958 | -3.4707808 |
| GM6961 | -2.1186323 |
| GM6999 | -1.607106  |
| GM7056 | -3.1690068 |
| GM7104 | -3.6138144 |
| GM7133 | -3.9737132 |
| GM7134 | -4.4100223 |
| GM7135 | -2.0132651 |
| GM715  | -2.8614366 |
| GM7157 | -6.1348114 |
| GM7167 | -10.961824 |
| GM725  | -1.432785  |
| GM7257 | -5.323002  |
| GM7271 | -3.2165847 |
| GM7276 | -4.021352  |
| GM7285 | -2.5289433 |
| GM732  | -5.738241  |
| GM7325 | -2.579227  |



|        |            |
|--------|------------|
| GM7444 | -3.8612845 |
| GM7457 | -3.6069024 |
| GM7467 | -2.5559316 |
| GM7480 | -3.2543218 |
| GM7489 | -4.729655  |
| GM7534 | -6.8397846 |
| GM7538 | -3.8479214 |
| GM7546 | -4.6487303 |
| GM7562 | -3.7753265 |
| GM7596 | -5.2025146 |
| GM7616 | -3.4400449 |
| GM7628 | -2.9795659 |
| GM7644 | -2.583038  |
| GM765  | -2.2712262 |
| GM766  | -4.3547144 |
| GM7714 | -5.7949476 |
| GM773  | -2.789125  |
| GM7789 | -3.6324253 |
| GM7827 | -2.5221841 |
| GM7849 | -6.394404  |
| GM7894 | -4.7695694 |
| GM7968 | -1.1945896 |
| GM7972 | -4.953389  |
| GM7978 | -5.869553  |
| GM7980 | -4.7153893 |
| GM8013 | -2.811759  |
| GM805  | -3.933032  |
| GM806  | -3.8237927 |
| GM8094 | -4.2203918 |
| GM813  | -2.2860804 |
| GM8140 | -3.222237  |
| GM8149 | -4.9234753 |
| GM815  | -2.8120651 |
| GM8165 | -3.1567774 |
| GM8212 | -3.235177  |
| GM826  | -3.3191676 |
| GM8273 | -1.4945796 |
| GM8298 | -1.7119136 |
| GM8300 | -3.4960494 |
| GM833  | -1.3113885 |
| GM8359 | -2.066424  |
| GM8439 | -4.5259714 |
| GM8479 | -1.7076583 |
| GM8505 | -3.3301525 |
| GM8579 | -3.9187138 |

|        |            |
|--------|------------|
| GM8630 | -2.5733423 |
| GM8633 | -2.1189415 |
| GM8672 | -5.067336  |
| GM8674 | -6.3598385 |
| GM8700 | -1.7407601 |
| GM8702 | -3.7822838 |
| GM8765 | -1.49844   |
| GM8787 | -1.66994   |
| GM8817 | -4.5155096 |
| GM884  | -5.0681486 |
| GM904  | -4.759671  |
| GM9047 | -2.8473022 |
| GM9054 | -1.7718267 |
| GM9059 | -2.475089  |
| GM9099 | -2.1303782 |
| GM9112 | -3.1790934 |
| GM9125 | -2.920663  |
| GM9258 | -1.882931  |
| GM9325 | -4.428261  |
| GM9376 | -6.160387  |
| GM94   | -1.832202  |
| GM9465 | -3.1146576 |
| GM9502 | -1.2479038 |
| GM9513 | -4.609151  |
| GM9519 | -2.5545416 |
| GM9548 | -4.852371  |
| GM9558 | -2.290281  |
| GM9564 | -3.2270758 |
| GM9573 | -4.99974   |
| GM960  | -4.0344744 |
| GM973  | -3.116269  |
| GM9753 | -2.8615723 |
| GM9758 | -1.5322876 |
| GM9767 | -5.3585415 |
| GM9776 | -2.882756  |
| GM9777 | -3.931867  |
| GM9779 | -2.4350607 |
| GM9789 | -4.800221  |
| GM9801 | -3.096896  |
| GM9804 | -1.7445147 |
| GM9831 | -3.6619148 |
| GM9839 | -2.3218794 |
| GM9860 | -4.4523354 |
| GM9866 | -4.8530865 |
| GM9868 | -1.1075916 |

|        |            |
|--------|------------|
| GM9869 | -4.646158  |
| GM9871 | -4.9180555 |
| GM9872 | -2.9584527 |
| GM9873 | -4.801881  |
| GM9876 | -2.5654223 |
| GM9878 | -3.5015154 |
| GM9886 | -3.3134243 |
| GM9902 | -4.6177945 |
| GM9910 | -0.7951014 |
| GM9916 | -0.7842708 |
| GM9918 | -3.9227757 |
| GM9919 | -3.7128417 |
| GM9921 | -3.168201  |
| GM9928 | -5.5308485 |
| GM9937 | -6.116662  |
| GM9946 | -1.9621024 |
| GM9951 | -5.086642  |
| GM9958 | -2.5884793 |
| GM9959 | -2.8954618 |
| GM996  | -3.3809254 |
| GM9960 | -2.8361666 |
| GM9961 | -3.2460463 |
| GM9962 | -6.965482  |
| GM9963 | -1.9290078 |
| GM9973 | -4.2757115 |
| GM9979 | -2.6813498 |
| GM9981 | -2.549084  |
| GM9984 | -5.4608364 |
| GML    | -5.671089  |
| GMNN   | -2.9563673 |
| GNA15  | -2.0863395 |
| GNAT3  | -3.304484  |
| GNAZ   | -3.269711  |
| GNB3   | -1.0047245 |
| GNG3   | -2.9110386 |
| GNG7   | -0.6719136 |
| GNRHR  | -4.6265445 |
| GON4L  | -2.968306  |
| GOT1L1 | -2.234766  |
| GP2    | -3.3204756 |
| GP6    | -1.7111275 |
| GPAT2  | -1.5476191 |
| GPBAR1 | -4.8382034 |
| GPC2   | -3.6911335 |
| GPC5   | -2.6519856 |

|         |            |
|---------|------------|
| GPC6    | -2.0527403 |
| GPER1   | -7.6600256 |
| GPR101  | -4.4681544 |
| GPR111  | -5.6436806 |
| GPR112  | -3.0864    |
| GPR115  | -6.570714  |
| GPR119  | -1.8337781 |
| GPR12   | -2.0955372 |
| GPR123  | -5.938904  |
| GPR128  | -2.310864  |
| GPR135  | -5.6611958 |
| GPR137C | -4.0191607 |
| GPR139  | -2.6929016 |
| GPR142  | -4.3416176 |
| GPR143  | -3.5256362 |
| GPR149  | -1.7004824 |
| GPR150  | -1.199167  |
| GPR151  | -2.6280746 |
| GPR152  | -3.069269  |
| GPR158  | -3.4835107 |
| GPR161  | -3.797951  |
| GPR162  | -2.0915487 |
| GPR165  | -1.1330812 |
| GPR17   | -3.8257024 |
| GPR183  | -2.2170777 |
| GPR21   | -4.454313  |
| GPR27   | -3.4261158 |
| GPR35   | -2.7366896 |
| GPR37   | -2.6680849 |
| GPR37L1 | -4.120364  |
| GPR45   | -2.5651524 |
| GPR50   | -2.862615  |
| GPR55   | -3.5011413 |
| GPR61   | -5.8186817 |
| GPR63   | -4.0010467 |
| GPR75   | -4.253861  |
| GPRC5D  | -1.6728163 |
| GPRIN2  | -2.641259  |
| GPX5    | -2.1682415 |
| GPX6    | -4.406903  |
| GRB10   | -1.6471591 |
| GRHL3   | -2.9232044 |
| GRIA2   | -2.6831036 |
| GRID1   | -2.5596495 |
| GRID2   | -4.0667963 |

|           |            |
|-----------|------------|
| GRIFIN    | -3.7075944 |
| GRIK1     | -2.1860979 |
| GRIK2     | -2.6825025 |
| GRIK3     | -2.3116171 |
| GRIK4     | -3.6008923 |
| GRIN1     | -1.5364654 |
| GRIN2A    | -2.9443612 |
| GRIN2B    | -2.9967713 |
| GRIN2D    | -3.7254972 |
| GRIN3A    | -5.086169  |
| GRIN3B    | -3.0638068 |
| GRIP1OS1  | -2.7083144 |
| GRIP2     | -4.5259843 |
| GRK1      | -3.7409444 |
| GRK4      | -2.0059934 |
| GRM1      | -3.1952517 |
| GRM4      | -4.1602983 |
| GRM5      | -1.6814337 |
| GRM7      | -1.8718097 |
| GRM8      | -1.6919823 |
| GRPR      | -4.9666004 |
| GRXCR1    | -2.2321417 |
| GRXCR2    | -3.9862838 |
| GSC       | -1.6225185 |
| GSC2      | -3.1407733 |
| GSDMA2    | -3.8019953 |
| GSDMA3    | -4.4102907 |
| GSDMC4    | -5.222577  |
| GSDMCL1   | -2.7632737 |
| GSDMCL2   | -7.2210784 |
| GSDMCL-PS | -1.7806344 |
| GSG1L     | -5.0406523 |
| GSTT4     | -0.7829077 |
| GSX2      | -4.241929  |
| GTF2A1L   | -3.3586504 |
| GTPBP3    | -1.819308  |
| GUCY1B2   | -2.6322403 |
| GUCY2E    | -3.6438942 |
| GUCY2F    | -4.401269  |
| GUCY2G    | -2.0824099 |
| GUF1      | -1.5950742 |
| GYKL1     | -5.7711344 |
| GZMD      | -2.2905974 |
| GZME      | -3.8747725 |
| GZMG      | -1.8528752 |

|          |            |
|----------|------------|
| H1FNT    | -1.7178168 |
| H1FOO    | -4.275447  |
| H1FX     | -4.3072414 |
| H2AFB1   | -3.0758657 |
| H2AFB2   | -4.902452  |
| H2BFM    | -1.463515  |
| H2-DMA   | -5.3222623 |
| H2-M1    | -4.1542215 |
| H2-M10.2 | -3.6921062 |
| H2-M10.3 | -3.1768317 |
| H2-M5    | -2.107426  |
| H2-M9    | -2.962242  |
| H2-T18   | -3.3959649 |
| H2-T3    | -3.0290623 |
| HAND1    | -1.7396023 |
| HAPLN1   | -1.9351606 |
| HAPLN2   | -1.8892238 |
| HAPLN3   | -2.6508756 |
| HAS2OS   | -3.065279  |
| HAS3     | -4.7130575 |
| HBA-X    | -3.033917  |
| HBB-BH2  | -4.885604  |
| HBB-Y    | -1.8756795 |
| HBQ1A    | -4.2914457 |
| HCAR1    | -1.6888347 |
| HCN3     | -5.30391   |
| HCN4     | -3.3316214 |
| HCRT     | -4.663028  |
| HCRTR1   | -1.3816075 |
| HCRTR2   | -4.3205833 |
| HDAC6    | -1.176353  |
| HDGFL1   | -7.4024715 |
| HDHD1A   | -4.9242306 |
| HEATR9   | -5.7652235 |
| HEMT1    | -2.7167137 |
| HENMT1   | -2.24131   |
| HEPHL1   | -5.547655  |
| HES2     | -2.2273307 |
| HES3     | -3.2244344 |
| HES7     | -1.0285785 |
| HFM1     | -3.205665  |
| HHIPL1   | -3.2931604 |
| HHIPL2   | -1.3344214 |
| HHLA1    | -5.8022094 |
| HIGD1C   | -3.8116503 |

|             |            |
|-------------|------------|
| HILS1       | -5.037891  |
| HIST1H1D    | -3.0766723 |
| HIST1H1T    | -7.20014   |
| HIST1H2BB   | -1.4475064 |
| HIST1H2BP   | -4.011806  |
| HIST1H3I    | -3.2393596 |
| HIST2H2AB   | -1.4214487 |
| HIST3H2BB-P | -2.662957  |
| HIVEP3      | -4.3380265 |
| HMBOX1      | -1.063107  |
| HMGB4       | -5.870391  |
| HMGB4OS     | -2.3352401 |
| HMX1        | -3.283226  |
| HMX2        | -5.972131  |
| HNF4G       | -3.4515846 |
| HOMER3      | -0.7885544 |
| HORMAD1     | -2.5692172 |
| HOTTIP      | -1.8836195 |
| HOXA10      | -2.7066226 |
| HOXA11      | -2.2320042 |
| HOXA11OS    | -2.3882475 |
| HOXA13      | -6.0638366 |
| HOXA6       | -4.4786587 |
| HOXB8       | -2.5228868 |
| HOXB9       | -3.881371  |
| HOXC10      | -7.0252414 |
| HOXC11      | -3.7412202 |
| HOXC12      | -3.506839  |
| HOXC4       | -3.7307985 |
| HOXC5       | -5.232769  |
| HOXC6       | -3.7535946 |
| HOXC8       | -2.6273975 |
| HOXC9       | -3.1859994 |
| HOXD1       | -4.0210266 |
| HOXD10      | -6.019288  |
| HOXD11      | -3.2266612 |
| HOXD13      | -2.6327307 |
| HOXD3       | -4.0712204 |
| HOXD3OS1    | -4.9795794 |
| HOXD4       | -2.512275  |
| HOXD8       | -3.2934718 |
| HOXD9       | -2.311613  |
| HPCAL4      | -4.838827  |
| HPDL        | -2.9073546 |
| HPSE2       | -2.9877324 |

|          |            |
|----------|------------|
| HRASLS5  | -2.5359747 |
| HRH1     | -2.1954112 |
| HRH3     | -3.4589694 |
| HRK      | -3.66172   |
| HRNR     | -4.0818443 |
| HS3ST2   | -3.4369917 |
| HS3ST3A1 | -1.4572501 |
| HS3ST3B1 | -2.325528  |
| HS3ST4   | -3.0312355 |
| HS3ST5   | -2.489364  |
| HS6ST3   | -1.3265235 |
| HSD11B2  | -2.5523665 |
| HSD17B1  | -2.6337192 |
| HSD3B4   | -3.3145654 |
| HSF2BP   | -2.9634662 |
| HSF3     | -3.8138175 |
| HSF4     | -1.7980208 |
| HSFY2    | -4.7743235 |
| HSPB3    | -3.3852186 |
| HSPB9    | -2.646533  |
| HTR1A    | -4.298956  |
| HTR1F    | -4.9929543 |
| HTR2A    | -6.457646  |
| HTR3B    | -4.29214   |
| HTR4     | -3.0307105 |
| HTR5A    | -1.3587122 |
| HTR6     | -3.4141958 |
| HTRA3    | -2.3491712 |
| HYAL5    | -0.8199496 |
| HYAL6    | -4.514165  |
| IBSP     | -4.1398263 |
| ICAM5    | -2.5609574 |
| IDI2     | -5.8142347 |
| IFLTD1   | -3.8340676 |
| IFNA11   | -5.422912  |
| IFNA12   | -2.653967  |
| IFNA13   | -4.1656275 |
| IFNA14   | -2.4879448 |
| IFNA16   | -4.3426256 |
| IFNA4    | -3.650927  |
| IFNAB    | -1.9335701 |
| IFNB1    | -1.15639   |
| IFNE     | -1.2513981 |
| IFNK     | -2.1920085 |
| IFNL3    | -4.122205  |



|           |            |
|-----------|------------|
| IFT88OS   | -3.4890337 |
| IGBP1B    | -5.1332746 |
| IGDCC3    | -2.2179708 |
| IGF2OS    | -2.2384953 |
| IGFL3     | -4.773981  |
| IGFN1     | -2.8840442 |
| IGH-V3660 | -4.240699  |
| IGKV4-53  | -2.4096582 |
| IGKV4-55  | -2.1512692 |
| IGKV4-72  | -3.072475  |
| IGKV6-20  | -1.7350099 |
| IGLL1     | -2.3171613 |
| IGLON5    | -2.2092383 |
| IGSF21    | -2.625145  |
| IGSF9B    | -0.957896  |
| IHH       | -3.733116  |
| IIGP1B    | -3.7436087 |
| IKZF3     | -1.0966187 |
| IL12RB2   | -1.3263693 |
| IL13      | -4.3620777 |
| IL17B     | -6.2627215 |
| IL17C     | -1.6814907 |
| IL1BOS    | -3.628491  |
| IL1F10    | -2.249038  |
| IL1F5     | -3.6485677 |
| IL1RAPL1  | -3.4766335 |
| IL2       | -1.4715028 |
| IL22      | -4.90552   |
| IL24      | -2.674055  |
| IL25      | -5.596991  |
| IL3       | -2.8395393 |
| IL31      | -4.6347756 |
| IL31RA    | -2.8403764 |
| IL4       | -2.4555616 |
| IL5       | -3.53581   |
| IL5RA     | -3.71017   |
| IL9       | -2.1009743 |
| IL9R      | -2.5235379 |
| INA       | -1.3759797 |
| INS1      | -2.1102016 |
| INS2      | -2.5561054 |
| INSM1     | -4.271064  |
| INSM2     | -2.7593222 |
| INSRR     | -1.3789923 |
| INTS1     | -0.9240294 |

|          |            |
|----------|------------|
| INTS2    | -0.6707408 |
| INTS6    | -1.7501409 |
| IPW      | -3.4336562 |
| IQCF1    | -3.336814  |
| IQCF3    | -5.6819735 |
| IQCF4    | -4.94003   |
| IQCF5    | -3.419416  |
| IQCF6    | -1.662852  |
| IQCJ     | -1.5039895 |
| IRGC1    | -3.8633733 |
| IRS3     | -3.124566  |
| IRS4     | -0.8772311 |
| IRX3OS   | -2.2908084 |
| IRX4     | -5.0738087 |
| ISL1     | -4.1922617 |
| ISL2     | -1.8846829 |
| ISLR2    | -2.3204925 |
| ISM2     | -6.170227  |
| ISOC2B   | -1.46894   |
| ISPD     | -1.8495994 |
| ISX      | -1.6328301 |
| ITGA2B   | -2.451355  |
| ITGAD    | -4.679532  |
| ITGB8    | -3.8211927 |
| ITPR3OS  | -2.426885  |
| ITPRIPL1 | -2.5768535 |
| IVL      | -5.198413  |
| IZUMO1   | -7.160513  |
| IZUMO2   | -6.074259  |
| IZUMO3   | -1.2437611 |
| JADE3    | -4.0966134 |
| JAKMIP1  | -3.4638968 |
| JAKMIP2  | -5.1249685 |
| JAKMIP3  | -5.681075  |
| JAZF1    | -3.4429064 |
| JMJD7    | -1.1429915 |
| JPH3     | -3.3420453 |
| JPH4     | -5.837138  |
| JUNOS    | -5.4146223 |
| JUP      | -0.9868276 |
| KANSL1L  | -3.8854048 |
| KAP      | -5.7270174 |
| KATNAL2  | -4.631465  |
| KBTBD12  | -3.9570029 |
| KBTBD13  | -3.192463  |

|           |            |
|-----------|------------|
| KCNA10    | -3.220358  |
| KCNA2     | -2.2868562 |
| KCNA5     | -2.9526558 |
| KCNA6     | -2.1908443 |
| KCNAB1    | -2.5407145 |
| KCNAB2    | -1.8732784 |
| KCNAB3    | -2.1991482 |
| KCNB2     | -4.2584653 |
| KCNC1     | -2.904389  |
| KCNC3     | -3.0091245 |
| KCNC4     | -2.5660846 |
| KCND2     | -3.760169  |
| KCND3OS   | -2.6273394 |
| KCNF1     | -3.329451  |
| KCNG1     | -3.7829235 |
| KCNG2     | -1.715251  |
| KCNG3     | -3.3317437 |
| KCNG4     | -2.7496881 |
| KCNH1     | -3.2291625 |
| KCNH5     | -2.1776476 |
| KCNH6     | -2.8542135 |
| KCNH7     | -3.1736505 |
| KCNH8     | -5.1854415 |
| KCNIP1    | -1.4124732 |
| KCNIP2    | -6.586464  |
| KCNJ1     | -2.8036265 |
| KCNJ11    | -3.6886978 |
| KCNJ14    | -2.0333903 |
| KCNJ3     | -2.8984659 |
| KCNJ6     | -1.4846728 |
| KCNJ9     | -5.425251  |
| KCNK10    | -3.7551594 |
| KCNK15    | -5.0808573 |
| KCNK16    | -3.4496439 |
| KCNK18    | -5.4681134 |
| KCNK4     | -1.2837577 |
| KCNK7     | -3.6127756 |
| KCNMA1    | -3.7275898 |
| KCNMB3    | -4.171177  |
| KCNMB4OS2 | -3.402532  |
| KCNN1     | -5.7257414 |
| KCNQ2     | -2.6996517 |
| KCNQ3     | -3.3689427 |
| KCNS1     | -4.0881557 |
| KCNS2     | -2.1932454 |

|         |            |
|---------|------------|
| KCNT1   | -3.8574462 |
| KCNU1   | -2.6143441 |
| KCNV1   | -1.7445967 |
| KCTD16  | -4.3127594 |
| KCTD7   | -7.426784  |
| KDM2A   | -1.0316973 |
| KHDC1B  | -2.7654347 |
| KHDC1C  | -6.7129025 |
| KHDRBS2 | -2.1293766 |
| KIF13B  | -3.032969  |
| KIF14   | -2.6480513 |
| KIF17   | -2.3966863 |
| KIF24   | -2.1922455 |
| KIF26B  | -1.633956  |
| KIF2A   | -2.0138884 |
| KIF2B   | -3.9998496 |
| KIF4-PS | -3.3291388 |
| KIF5B   | -0.8725309 |
| KIF7    | -3.4362028 |
| KIR3DL1 | -4.0319304 |
| KIR3DL2 | -1.4599838 |
| KIRREL2 | -6.91535   |
| KIS2    | -2.1634328 |
| KISS1   | -4.517874  |
| KL      | -1.3072832 |
| KLF14   | -2.8784385 |
| KLF17   | -5.2435894 |
| KLHDC7B | -2.1364818 |
| KLHDC8A | -1.9830451 |
| KLHL1   | -8.759438  |
| KLHL10  | -3.404248  |
| KLHL14  | -2.0549984 |
| KLHL23  | -3.281408  |
| KLHL3   | -5.4943757 |
| KLHL30  | -3.9401712 |
| KLHL31  | -4.325609  |
| KLHL34  | -4.9216146 |
| KLHL40  | -5.585018  |
| KLK10   | -3.0640957 |
| KLK12   | -3.2098908 |
| KLK14   | -2.3455427 |
| KLK15   | -3.4270306 |
| KLK1B1  | -5.176775  |
| KLK1B11 | -3.6140113 |
| KLK1B21 | -1.0798092 |

|           |            |
|-----------|------------|
| KLK1B7-PS | -2.847387  |
| KLK1B9    | -0.916512  |
| KLK4      | -2.3577323 |
| KLK5      | -4.777045  |
| KLK6      | -4.2523923 |
| KLK7      | -2.306225  |
| KLK9      | -1.4415364 |
| KLRA10    | -4.316268  |
| KLRA19    | -1.4962394 |
| KLRB1     | -3.9195824 |
| KLRB1-PS1 | -5.3733506 |
| KLRG2     | -2.8966868 |
| KMT2D     | -0.9308987 |
| KNCN      | -2.1890552 |
| KPNA7     | -3.2359552 |
| KPRP      | -5.594097  |
| KREMEN2   | -4.6620617 |
| KRT1      | -1.9375443 |
| KRT10     | -1.353467  |
| KRT12     | -2.3439145 |
| KRT13     | -4.026352  |
| KRT14     | -1.2128761 |
| KRT2      | -4.4508467 |
| KRT20     | -5.918381  |
| KRT24     | -6.094632  |
| KRT25     | -1.618021  |
| KRT26     | -5.7479277 |
| KRT27     | -7.99304   |
| KRT28     | -3.0286326 |
| KRT32     | -2.0331569 |
| KRT33A    | -5.4470367 |
| KRT33B    | -2.7893672 |
| KRT34     | -2.9728367 |
| KRT35     | -3.9616334 |
| KRT36     | -3.774659  |
| KRT39     | -5.000224  |
| KRT4      | -6.8684893 |
| KRT40     | -3.1896243 |
| KRT5      | -4.1964445 |
| KRT6A     | -4.3294487 |
| KRT6B     | -4.574517  |
| KRT71     | -2.2534037 |
| KRT72     | -4.4676266 |
| KRT74     | -5.794335  |
| KRT76     | -3.174762  |

|            |            |
|------------|------------|
| KRT77      | -2.0001702 |
| KRT82      | -3.8679676 |
| KRT84      | -2.3310273 |
| KRT9       | -4.499755  |
| KRTAP10-4  | -2.6835651 |
| KRTAP1-3   | -2.5949388 |
| KRTAP1-4   | -1.4834731 |
| KRTAP15    | -5.247716  |
| KRTAP16-1  | -3.7866416 |
| KRTAP16-3  | -1.8750658 |
| KRTAP19-5  | -2.5568492 |
| KRTAP19-9B | -2.7890432 |
| KRTAP21-1  | -3.7395506 |
| KRTAP2-4   | -3.3082924 |
| KRTAP24-1  | -5.392658  |
| KRTAP26-1  | -3.6388724 |
| KRTAP31-2  | -6.2275105 |
| KRTAP4-1   | -4.277997  |
| KRTAP4-2   | -3.2917204 |
| KRTAP4-7   | -3.787697  |
| KRTAP4-9   | -2.7691176 |
| KRTAP5-5   | -1.8858116 |
| KRTAP6-2   | -2.119956  |
| KRTAP6-5   | -3.3706799 |
| KRTAP8-1   | -4.568946  |
| KRTAP9-3   | -3.3744729 |
| KRTDAP     | -4.8046327 |
| KSR2       | -2.3546717 |
| KY         | -5.2681484 |
| L1CAM      | -2.854489  |
| L3MBTL1    | -2.8726282 |
| L3MBTL2    | -2.9680605 |
| L3MBTL4    | -3.1934323 |
| LACTBL1    | -4.156348  |
| LAD1       | -1.3517416 |
| LALBA      | -0.9794095 |
| LAMP5      | -1.9003625 |
| LAO1       | -2.5465283 |
| LAX1       | -3.6916645 |
| LCE1A1     | -2.8552997 |
| LCE1C      | -2.2057247 |
| LCE1E      | -2.3280323 |
| LCE1G      | -4.9409533 |
| LCE1H      | -4.0313835 |
| LCE1I      | -4.6022034 |

|          |            |
|----------|------------|
| LCE1J    | -2.618264  |
| LCE1K    | -2.5353265 |
| LCE1L    | -3.787541  |
| LCE1M    | -3.306523  |
| LCE3C    | -4.1594725 |
| LCE3D    | -1.6423578 |
| LCE3F    | -2.5858212 |
| LCN10    | -6.531321  |
| LCN11    | -4.488651  |
| LCN3     | -5.676535  |
| LCN5     | -4.2220316 |
| LCN9     | -2.7560103 |
| LCT      | -3.1195202 |
| LCTL     | -4.0608783 |
| LDHAL6B  | -1.1104186 |
| LDHC     | -3.9788878 |
| LEFTY1   | -2.0959074 |
| LELP1    | -2.0081122 |
| LEMD1    | -2.5455735 |
| LEP      | -2.4927282 |
| LGALS7   | -3.984495  |
| LGI1     | -2.7154508 |
| LHB      | -2.1102345 |
| LHFPL1   | -4.950965  |
| LHX1     | -4.6933727 |
| LHX4     | -3.7426136 |
| LHX8     | -1.7305572 |
| LHX9     | -2.5549347 |
| LIF      | -4.5766582 |
| LIM2     | -5.603474  |
| LIMK2    | -1.2264769 |
| LIN28B   | -3.4825475 |
| LIN7B    | -3.6914232 |
| LINGO3   | -4.5548525 |
| LIPM     | -1.8633459 |
| LIPN     | -3.3274133 |
| LIPO4    | -5.26951   |
| LIX1     | -4.308586  |
| LKAAEAR1 | -4.8570127 |
| LMAN1L   | -2.0297077 |
| LMO3     | -1.6406498 |
| LMOD1    | -3.0069635 |
| LMOD2    | -2.2089942 |
| LMX1A    | -1.9857285 |
| LMX1B    | -3.3972836 |

LOC1000481: -2.5918853  
LOC1005025: -2.5978274  
LOC1005030: -5.5242243  
LOC1008621: -4.338274  
LOC1008624: -2.3899093  
LOC1010556: -4.8261967  
LOC1010557: -3.634882  
LOC1010558: -2.5313375  
LOC1010559: -4.649659  
LOC1010559: -4.4355373  
LOC1010559: -3.7477102  
LOC1010559: -3.177519  
LOC1010560: -3.369617  
LOC1010560: -3.156851  
LOC1010562: -1.2049153  
LOC1010562: -5.715647  
LOC1026318: -5.5824604  
LOC1026321: -2.1954024  
LOC1026322: -3.3871145  
LOC1026324: -4.336919  
LOC1026328: -3.0986328  
LOC1026330: -3.5647562  
LOC1026331: -4.3127995  
LOC1026333: -3.2348025  
LOC1026337: -5.965897  
LOC1026338: -4.520099  
LOC1026340: -1.8399506  
LOC1026341: -3.1605015  
LOC1026344: -1.1449075  
LOC1026345: -3.7211027  
LOC1026345: -3.5422134  
LOC1026346: -4.038794  
LOC1026352: -5.5394697  
LOC1026353: -3.5684052  
LOC1026354: -2.6053162  
LOC1026355: -5.356573  
LOC1026356: -3.7291496  
LOC1026356: -2.7266483  
LOC1026360: -5.8620977  
LOC1026361: -2.6188004  
LOC1026362: -1.8649662  
LOC1026367: -1.7463  
LOC1026367: -3.1098692  
LOC1026369: -4.5903854  
LOC1026369: -0.8360066



|            |            |
|------------|------------|
| LOC1026370 | -4.094926  |
| LOC1026374 | -1.310698  |
| LOC1026377 | -2.89603   |
| LOC1026377 | -2.1133256 |
| LOC1026379 | -3.6578608 |
| LOC1026379 | -2.2005384 |
| LOC1026382 | -2.7942207 |
| LOC1026386 | -5.02042   |
| LOC1026387 | -4.4621716 |
| LOC1026389 | -2.6006322 |
| LOC1026392 | -1.4110506 |
| LOC1026396 | -5.312641  |
| LOC1026396 | -1.6884685 |
| LOC1026397 | -3.6424763 |
| LOC1026398 | -5.8661237 |
| LOC1026412 | -2.2423503 |
| LOC1026412 | -5.100396  |
| LOC1026413 | -1.7302017 |
| LOC1026413 | -2.8819032 |
| LOC1026416 | -2.5795414 |
| LOC1026416 | -3.160191  |
| LOC1026417 | -4.60875   |
| LOC1026418 | -2.2519717 |
| LOC1026420 | -5.1147566 |
| LOC1026420 | -3.705585  |
| LOC1026420 | -4.377096  |
| LOC1026421 | -3.8898063 |
| LOC1026422 | -4.8493342 |
| LOC1026423 | -2.7334924 |
| LOC1026424 | -4.1475916 |
| LOC1026424 | -4.2822976 |
| LOC1026425 | -1.5051396 |
| LOC1026426 | -4.9622936 |
| LOC1026427 | -0.8210113 |
| LOC1026427 | -1.4523141 |
| LOC1026429 | -1.5909655 |
| LOC1026431 | -6.0854816 |
| LOC1026431 | -4.539545  |
| LOC171588  | -3.149933  |
| LONRF2     | -1.5268996 |
| LOR        | -2.1946437 |
| LOXHD1     | -4.3951135 |
| LPAR4      | -5.0638795 |
| LPAR5      | -1.3103969 |
| LPCAT2B    | -4.690996  |

|           |            |
|-----------|------------|
| LRCH3     | -2.9307292 |
| LRFN1     | -0.9407802 |
| LRFN5     | -4.0385947 |
| LRP1B     | -4.5561066 |
| LRR1      | -2.7685928 |
| LRRC15    | -2.192705  |
| LRRC16B   | -3.6668634 |
| LRRC18    | -2.629334  |
| LRRC29    | -3.3383658 |
| LRRC30    | -3.0084267 |
| LRRC39    | -2.8143036 |
| LRRC4C    | -2.6854224 |
| LRRC55    | -2.5158694 |
| LRRC57    | -0.8346856 |
| LRRC63    | -1.6493678 |
| LRRC66    | -2.0100894 |
| LRRC69    | -1.8266225 |
| LRRC7     | -2.4550855 |
| LRRC74    | -7.1988797 |
| LRRC9     | -3.1192105 |
| LRRD1     | -2.7883456 |
| LRRIQ4    | -6.359236  |
| LRRN2     | -3.4896548 |
| LRRTM1    | -3.4696634 |
| LRRTM2    | -4.7368183 |
| LRRTM3    | -2.3814077 |
| LRTM1     | -3.9360802 |
| LTA       | -3.227303  |
| LUZP2     | -3.2537394 |
| LY6G5C    | -2.4849052 |
| LY6G6F    | -3.2172983 |
| LY6H      | -3.0574567 |
| LY75      | -1.8872881 |
| LYG1      | -2.4854293 |
| LYG2      | -5.465376  |
| LYPD3     | -2.8647718 |
| LYPD6     | -1.8696692 |
| LYPD8     | -5.9833755 |
| LYZL1     | -4.8114805 |
| LYZL4     | -3.458561  |
| LYZL6     | -2.4113455 |
| MAB21L3   | -1.228035  |
| MACROD2OS | -5.1884103 |
| MAD2L1    | -1.2737751 |
| MADCAM1   | -1.685276  |

|            |            |
|------------|------------|
| MAEL       | -5.735488  |
| MAGEA1     | -4.7758064 |
| MAGEA10    | -5.5531945 |
| MAGEA3     | -2.8955128 |
| MAGEA4     | -2.2842124 |
| MAGEA5     | -6.969707  |
| MAGEA6     | -2.633354  |
| MAGEB1     | -3.0822756 |
| MAGEB16-PS | -3.5773487 |
| MAGEB18    | -2.5573907 |
| MAGEB3     | -3.3453026 |
| MAGEB4     | -2.0604653 |
| MAGEE1     | -1.1909904 |
| MAGEE2     | -4.2821097 |
| MAGEL2     | -3.089499  |
| MAGI2      | -2.9173193 |
| MAMDC4     | -1.4502852 |
| MAMLD1     | -4.2589808 |
| MAN2C1OS   | -0.9284124 |
| MANEAL     | -4.627206  |
| MAP2K6     | -1.8589709 |
| MAP2K7     | -2.1896813 |
| MAP3K10    | -2.9099264 |
| MAP3K12    | -1.5994437 |
| MAP3K13    | -1.2672482 |
| MAP3K7CL   | -3.922086  |
| MAP7D2     | -3.2660842 |
| MAPK8      | -9.027595  |
| MAPK8IP2   | -2.693372  |
| MAPKBP1    | -2.0098932 |
| MAST1      | -2.5717058 |
| MATK       | -1.6098495 |
| MATN3      | -2.546807  |
| MBD3L1     | -2.4634707 |
| MBOAT4     | -1.7453752 |
| MC1R       | -1.8706594 |
| MC4R       | -1.5309014 |
| MCHR1      | -4.247959  |
| MCM8       | -1.51003   |
| MCPT1      | -2.9844642 |
| MCPT2      | -3.822451  |
| MCPT9      | -7.514761  |
| MCPT-PS1   | -4.229372  |
| MDGA2      | -3.5288944 |
| MDK        | -0.9798765 |

|          |            |
|----------|------------|
| MED18    | -1.0545766 |
| MEF2B    | -2.733096  |
| MEGF10   | -2.856425  |
| MEGF11   | -2.5346692 |
| MEI1     | -5.1086235 |
| MEI4     | -2.9251502 |
| MEIS3    | -1.2453597 |
| MEP1A    | -1.817694  |
| MEP1B    | -2.6527255 |
| METTL11B | -5.6761374 |
| METTL13  | -4.6400256 |
| METTL21E | -2.7702086 |
| METTL7A1 | -1.3349617 |
| METTL8   | -2.1243274 |
| MEX3A    | -3.898879  |
| MFSD9    | -2.389096  |
| MGAT4C   | -5.0565495 |
| MGAT5    | -0.8662412 |
| MICAL2   | -1.0030017 |
| MICALCL  | -3.5468295 |
| MICU3    | -1.959852  |
| MID2     | -2.3978617 |
| MIP      | -3.2762887 |
| MIPOL1   | -1.8892789 |
| MIRG     | -3.1610887 |
| MISP     | -4.655727  |
| MIXL1    | -3.5849125 |
| MKKNK1   | -1.5002728 |
| MKRN2    | -1.0156107 |
| MMP10    | -4.370723  |
| MMP16    | -2.346756  |
| MMP1B    | -4.598752  |
| MMP21    | -4.121434  |
| MMP24    | -1.3726776 |
| MMP27    | -0.8985679 |
| MMP28    | -3.304237  |
| MMS19    | -1.064462  |
| MOG      | -0.6696463 |
| MOGAT1   | -2.7006927 |
| MORC1    | -1.1351688 |
| MORC2B   | -3.4252305 |
| MORN2    | -0.9234338 |
| MOS      | -4.02666   |
| MOV10L1  | -3.1164143 |
| MOXD2    | -3.0937948 |

|          |            |
|----------|------------|
| MPHOSPH9 | -2.9288704 |
| MPP3     | -1.6821375 |
| MPP4     | -3.2204225 |
| MPTX1    | -1.7902944 |
| MRGPRA1  | -3.775188  |
| MRGPRA4  | -2.0637608 |
| MRGPRA8  | -3.2755122 |
| MRGPRB1  | -2.727656  |
| MRGPRB13 | -1.6694157 |
| MRGPRB3  | -3.0889492 |
| MRGPRB4  | -3.0375621 |
| MRGPRE   | -2.0135314 |
| MRGPRH   | -3.899016  |
| MRGPRX1  | -3.0410914 |
| MRGPRX2  | -2.2785842 |
| MRO      | -2.5492575 |
| MROH2A   | -3.1962862 |
| MROH2B   | -1.7499673 |
| MROH7    | -5.513009  |
| MROH8    | -1.6306641 |
| MROH9    | -2.4980278 |
| MRPL28   | -5.393664  |
| MS4A10   | -4.5368257 |
| MS4A12   | -2.1591678 |
| MS4A13   | -2.6323404 |
| MS4A14   | -2.1309433 |
| MS4A18   | -2.4723742 |
| MS4A5    | -1.9871836 |
| MSGN1    | -4.625385  |
| MSH4     | -2.3523133 |
| MSH5     | -2.8778543 |
| MSLNL    | -4.4913836 |
| MSMB     | -4.3231754 |
| MSMP     | -3.7566605 |
| MSX2     | -1.326273  |
| MSX3     | -3.6796117 |
| MT4      | -0.8495805 |
| MTAG2    | -2.25491   |
| MTERF1B  | -0.9420099 |
| MTL5     | -1.7746758 |
| MTNR1A   | -1.8037832 |
| MTNR1B   | -5.256503  |
| MTRR     | -1.1074636 |
| MUC15    | -2.4208572 |
| MUC19    | -2.9614828 |

|          |            |
|----------|------------|
| MUC5AC   | -1.7289014 |
| MUC6     | -3.0186346 |
| MUCL1    | -5.142537  |
| MUP6     | -4.1360283 |
| MURC     | -3.5713203 |
| MUSK     | -1.0005825 |
| MXI1     | -2.711308  |
| MYBPC1   | -3.1717448 |
| MYBPH    | -3.4566126 |
| MYCS     | -3.480309  |
| MYCT1    | -2.8041158 |
| MYH1     | -5.290783  |
| MYH13    | -4.48386   |
| MYH15    | -5.495089  |
| MYH2     | -0.8346567 |
| MYH4     | -4.861977  |
| MYL10    | -5.1563077 |
| MYL2     | -5.955183  |
| MYL6B    | -1.1940727 |
| MYLK4    | -1.5168912 |
| MYLPF    | -2.3126352 |
| MYO15    | -4.0545883 |
| MYO16    | -3.2620502 |
| MYO18B   | -1.8080754 |
| MYO1A    | -2.9918933 |
| MYO3A    | -4.290766  |
| MYO3B    | -2.0746896 |
| MYO7A    | -0.9350793 |
| MYO7B    | -2.521913  |
| MYOC     | -3.5920517 |
| MYOD1    | -3.3152626 |
| MYOG     | -2.609749  |
| MYOM3    | -1.394969  |
| MYOT     | -9.734974  |
| MYOZ1    | -3.7018337 |
| MYOZ3    | -3.3205144 |
| MYPN     | -4.9683857 |
| MYRFL    | -2.2018726 |
| MYT1L    | -3.6745455 |
| N4BP1    | -0.9758856 |
| N4BP2OS  | -2.8097086 |
| NAA11    | -3.4246676 |
| NAALADL1 | -3.2249062 |
| NAIF1    | -2.5686088 |
| NAIP7    | -3.41514   |

|           |            |
|-----------|------------|
| NALCN     | -3.7949057 |
| NANOS2    | -3.543546  |
| NAP1L2    | -1.1048834 |
| NAP1L3    | -0.8841124 |
| NAP1L5    | -2.7773757 |
| NAT14     | -1.5481796 |
| NAT3      | -3.506845  |
| NAV3      | -1.676553  |
| NCAM2     | -3.2308843 |
| NCAN      | -3.4217603 |
| NCKAP5L   | -3.63272   |
| NCTC1     | -1.5535033 |
| NDC80     | -4.669631  |
| NDFIP2    | -3.987218  |
| NDP       | -2.484322  |
| NDST3     | -5.325759  |
| NDST4     | -3.3703463 |
| NDUFAF5   | -1.2424033 |
| NEB       | -2.836904  |
| NEFH      | -3.0944037 |
| NEFM      | -4.46476   |
| NEK10     | -3.8179011 |
| NELL1     | -2.5328946 |
| NEPN      | -4.2268515 |
| NESPAS    | -4.9021983 |
| NETO1     | -2.7337737 |
| NETO2     | -1.8036807 |
| NEU2      | -1.6696517 |
| NEU4      | -2.67321   |
| NEUROD4   | -3.0510676 |
| NEUROG1   | -1.2900763 |
| NEUROG3   | -3.318427  |
| NGB       | -3.383409  |
| NHLH1     | -0.7452915 |
| NHLH2     | -1.880444  |
| NIM1K     | -3.8822238 |
| NINJ2     | -1.2596014 |
| NIPAL4    | -0.9452825 |
| NIPSNAP3A | -1.6906681 |
| NKAIN1    | -0.9612713 |
| NKAIN2    | -2.5632763 |
| NKAIN3    | -1.4287271 |
| NKPD1     | -5.645807  |
| NKX1-1    | -2.5803478 |
| NKX1-2    | -4.364814  |

|          |            |
|----------|------------|
| NKX2-3   | -4.849162  |
| NKX2-5   | -1.6884961 |
| NKX2-6   | -5.318774  |
| NKX2-9   | -3.9286366 |
| NKX3-1   | -4.340516  |
| NKX3-2   | -7.1323395 |
| NKX6-2   | -2.209157  |
| NKX6-3   | -5.678098  |
| NLE1     | -2.9468246 |
| NLGN1    | -3.6439528 |
| NLRP10   | -4.4217367 |
| NLRP14   | -2.9053657 |
| NLRP1B   | -1.8543477 |
| NLRP2    | -3.6519916 |
| NLRP4A   | -3.35178   |
| NLRP4B   | -5.426713  |
| NLRP4C   | -6.5631433 |
| NLRP4D   | -4.490678  |
| NLRP4E   | -3.971736  |
| NLRP4F   | -5.2535105 |
| NLRP4G   | -4.5464153 |
| NLRP5    | -2.859994  |
| NLRP5-PS | -3.4257011 |
| NLRP9A   | -3.7346995 |
| NLRP9C   | -1.6477242 |
| NMBR     | -3.7638829 |
| NME8     | -4.4510574 |
| NMS      | -1.1531699 |
| NMU      | -2.9391377 |
| NMUR1    | -4.5711184 |
| NOBOX    | -3.2214293 |
| NOL3     | -3.2803323 |
| NOL4     | -1.5157394 |
| NOP9     | -1.1351099 |
| NOS1     | -3.334188  |
| NOTO     | -4.5557714 |
| NOTUMOS  | -3.110425  |
| NPAS1    | -3.9318895 |
| NPAS3    | -2.4845345 |
| NPAS4    | -12.536355 |
| NPAT     | -2.173613  |
| NPBWR1   | -3.94304   |
| NPC1L1   | -1.5183241 |
| NPFFR1   | -3.5557578 |
| NPFFR2   | -3.473548  |



|          |            |
|----------|------------|
| NPHS1    | -3.3786922 |
| NPM3     | -1.3204911 |
| NPM3-PS1 | -2.307826  |
| NPPB     | -3.0482402 |
| NPS      | -1.413661  |
| NPSR1    | -3.5490937 |
| NPTX2    | -1.9741998 |
| NPVF     | -3.1686592 |
| NPY2R    | -4.466177  |
| NPY4R    | -3.2645524 |
| NPY5R    | -2.2146509 |
| NPY6R    | -1.5535171 |
| NROB1    | -2.0299823 |
| NROB2    | -3.276401  |
| NR2E3    | -1.7622294 |
| NR3C2    | -4.6653924 |
| NRAP     | -0.8857369 |
| NRG2     | -2.3539867 |
| NRG3     | -2.3238251 |
| NRGN     | -1.9505813 |
| NRIP2    | -3.2899325 |
| NRK      | -2.055793  |
| NRL      | -6.121304  |
| NRP      | -5.3800116 |
| NRSN1    | -2.5019841 |
| NRXN3    | -2.3252625 |
| NSG2     | -3.630865  |
| NSUN7    | -2.3438942 |
| NT5C1A   | -1.8486228 |
| NT5C1B   | -2.8340335 |
| NTF5     | -2.8525765 |
| NTHL1    | -2.6017535 |
| NTN5     | -3.0658937 |
| NTNG1    | -5.7127123 |
| NTRK1    | -6.1468897 |
| NTSR1    | -5.099345  |
| NUAK1    | -2.7935145 |
| NUDT12OS | -4.293097  |
| NUDT15   | -1.8137763 |
| NUDT17   | -3.4282055 |
| NUDT18   | -2.269577  |
| NUP62CL  | -1.5795865 |
| NXF2     | -1.3338642 |
| NXNL1    | -1.4294021 |
| NXPH1    | -3.6413426 |

|          |            |
|----------|------------|
| NYAP2    | -4.972131  |
| NYNRIN   | -4.04105   |
| OAS1D    | -4.517184  |
| OAS1E    | -0.9729197 |
| OAS1G    | -0.8600166 |
| OAS1H    | -4.7283745 |
| OAZ3     | -7.6977386 |
| OBOX1    | -2.6054637 |
| OBOX3    | -3.7555666 |
| OBOX5    | -5.7390866 |
| OBOX6    | -2.0419168 |
| OBP1A    | -1.392004  |
| OBP2B    | -4.2004137 |
| OCA2     | -1.9256866 |
| OCM      | -3.4994066 |
| ODAM     | -3.120577  |
| ODF1     | -4.7644486 |
| ODF3     | -3.0284061 |
| ODF3L2   | -3.2171066 |
| ODF4     | -4.580792  |
| OFCC1    | -4.53906   |
| OGDHL    | -3.8518891 |
| OIP5     | -3.4027538 |
| OIT1     | -3.0525706 |
| OLAH     | -6.8091955 |
| OLFM2    | -1.527492  |
| OLFM3    | -4.1199703 |
| OLFML1   | -1.080867  |
| OLFML2A  | -1.6039386 |
| OLFR1    | -3.388219  |
| OLFR10   | -2.694504  |
| OLFR100  | -3.6063604 |
| OLFR1000 | -4.494857  |
| OLFR1006 | -4.40602   |
| OLFR1009 | -5.42854   |
| OLFR101  | -3.0054088 |
| OLFR1010 | -4.1235085 |
| OLFR1012 | -4.3266973 |
| OLFR1013 | -4.045413  |
| OLFR1014 | -3.5056472 |
| OLFR1015 | -4.22116   |
| OLFR1016 | -3.0810297 |
| OLFR1018 | -4.271831  |
| OLFR1019 | -5.131439  |
| OLFR102  | -3.239711  |

|            |            |
|------------|------------|
| OLFR1023   | -3.4416153 |
| OLFR1024   | -3.6880205 |
| OLFR1026   | -1.9611864 |
| OLFR1028   | -3.7717712 |
| OLFR1029   | -2.1653764 |
| OLFR1030   | -4.8893456 |
| OLFR1031   | -3.5205982 |
| OLFR1032   | -5.0693445 |
| OLFR1033   | -6.1651273 |
| OLFR1036   | -2.1646323 |
| OLFR1039   | -4.183452  |
| OLFR1040   | -5.6667414 |
| OLFR1042   | -5.598878  |
| OLFR1043   | -2.166436  |
| OLFR1044   | -2.9140136 |
| OLFR1045   | -3.4927156 |
| OLFR1046   | -5.4412403 |
| OLFR1047   | -2.01371   |
| OLFR1049   | -3.0276318 |
| OLFR104-PS | -4.2912025 |
| OLFR1051   | -4.7657633 |
| OLFR1052   | -5.7224593 |
| OLFR1054   | -6.180791  |
| OLFR1055   | -6.8197412 |
| OLFR1056   | -4.433797  |
| OLFR1057   | -3.8900805 |
| OLFR1058   | -1.8028591 |
| OLFR105-PS | -5.154659  |
| OLFR1061   | -4.985028  |
| OLFR1062   | -3.9674513 |
| OLFR1065   | -4.6577244 |
| OLFR1066   | -2.149032  |
| OLFR107    | -5.532036  |
| OLFR108    | -2.2536988 |
| OLFR1082   | -3.413617  |
| OLFR1085   | -3.6815493 |
| OLFR1086   | -4.000363  |
| OLFR1089   | -4.711958  |
| OLFR109    | -1.9884672 |
| OLFR1090   | -4.1439495 |
| OLFR1093   | -2.672543  |
| OLFR1094   | -1.1633673 |
| OLFR1097   | -3.284165  |
| OLFR1099   | -2.533349  |
| OLFR11     | -4.2489347 |

|          |            |
|----------|------------|
| OLFR110  | -6.568904  |
| OLFR1100 | -7.355258  |
| OLFR1102 | -3.607678  |
| OLFR1106 | -2.170474  |
| OLFR1107 | -5.877541  |
| OLFR1109 | -2.5239065 |
| OLFR111  | -4.880269  |
| OLFR1110 | -8.292561  |
| OLFR1111 | -6.3034964 |
| OLFR1112 | -4.8557863 |
| OLFR1115 | -2.2287908 |
| OLFR1118 | -1.2849667 |
| OLFR112  | -1.0831952 |
| OLFR1120 | -2.8690307 |
| OLFR1122 | -2.9111047 |
| OLFR1123 | -4.971882  |
| OLFR1124 | -5.878521  |
| OLFR1128 | -3.3349044 |
| OLFR1129 | -2.397124  |
| OLFR113  | -3.3090186 |
| OLFR1130 | -1.8744397 |
| OLFR1135 | -5.4444723 |
| OLFR1136 | -6.890385  |
| OLFR1137 | -5.6305885 |
| OLFR1138 | -4.473613  |
| OLFR114  | -4.7869377 |
| OLFR1140 | -6.357556  |
| OLFR1141 | -4.7443314 |
| OLFR1145 | -5.982619  |
| OLFR1148 | -1.0956347 |
| OLFR115  | -3.0388806 |
| OLFR1151 | -2.8156736 |
| OLFR1152 | -6.328397  |
| OLFR1153 | -4.6907487 |
| OLFR1155 | -4.377325  |
| OLFR1156 | -4.5095663 |
| OLFR1157 | -5.852304  |
| OLFR1158 | -4.9482813 |
| OLFR1160 | -2.1047404 |
| OLFR1161 | -1.904665  |
| OLFR1162 | -5.1471205 |
| OLFR1164 | -3.8929408 |
| OLFR1168 | -1.2296598 |
| OLFR117  | -2.1689372 |
| OLFR1170 | -4.7185817 |

|          |            |
|----------|------------|
| OLFR1173 | -6.089417  |
| OLFR1176 | -1.6340752 |
| OLFR1178 | -4.5473714 |
| OLFR1179 | -6.437972  |
| OLFR118  | -4.7212095 |
| OLFR1180 | -1.7152438 |
| OLFR1181 | -4.564623  |
| OLFR1182 | -2.948347  |
| OLFR1183 | -2.0335908 |
| OLFR1184 | -3.5195427 |
| OLFR1186 | -2.5739384 |
| OLFR1189 | -5.189066  |
| OLFR1193 | -6.3420544 |
| OLFR1195 | -2.6355953 |
| OLFR1196 | -2.604395  |
| OLFR1199 | -1.7288046 |
| OLFR12   | -2.169     |
| OLFR120  | -4.9717374 |
| OLFR1200 | -5.258831  |
| OLFR1202 | -6.176873  |
| OLFR1205 | -2.9753802 |
| OLFR1206 | -5.595895  |
| OLFR1209 | -1.1555583 |
| OLFR121  | -2.0221055 |
| OLFR1214 | -4.8828163 |
| OLFR1215 | -3.4551659 |
| OLFR1216 | -2.688924  |
| OLFR1217 | -3.5138874 |
| OLFR122  | -4.353279  |
| OLFR1220 | -3.8094053 |
| OLFR1221 | -1.0000277 |
| OLFR1222 | -2.215763  |
| OLFR1223 | -1.5814202 |
| OLFR1226 | -5.949319  |
| OLFR1230 | -1.5609608 |
| OLFR1231 | -4.686142  |
| OLFR1232 | -1.8795967 |
| OLFR1233 | -2.8363943 |
| OLFR1234 | -1.9178119 |
| OLFR1238 | -5.5584793 |
| OLFR124  | -4.4204035 |
| OLFR1241 | -2.991118  |
| OLFR1243 | -2.5407844 |
| OLFR1245 | -5.244704  |
| OLFR1248 | -4.985655  |

|             |            |
|-------------|------------|
| OLFR1250    | -2.8894672 |
| OLFR1251    | -1.6905329 |
| OLFR1252    | -1.3408635 |
| OLFR1254    | -7.3193445 |
| OLFR1255    | -1.6958041 |
| OLFR1256    | -3.9760537 |
| OLFR1257    | -4.1929793 |
| OLFR1258    | -4.3032846 |
| OLFR1259    | -4.696792  |
| OLFR126     | -4.7095213 |
| OLFR1261    | -5.5733314 |
| OLFR1262    | -5.785922  |
| OLFR1263    | -3.5675945 |
| OLFR1265    | -3.9400225 |
| OLFR1270    | -3.3793151 |
| OLFR1271    | -4.4973736 |
| OLFR1272    | -4.897155  |
| OLFR1273-PS | -1.636167  |
| OLFR1275    | -6.3350344 |
| OLFR1276    | -2.7882023 |
| OLFR1277    | -4.087457  |
| OLFR1278    | -5.0232687 |
| OLFR1279    | -3.3756182 |
| OLFR1280    | -3.388985  |
| OLFR1285    | -3.092447  |
| OLFR1286    | -5.164554  |
| OLFR1287    | -4.7364073 |
| OLFR1288    | -5.134206  |
| OLFR1289    | -6.141038  |
| OLFR129     | -7.3803062 |
| OLFR1290    | -2.4310906 |
| OLFR1294    | -2.7643032 |
| OLFR1295    | -2.0889034 |
| OLFR1297    | -4.8283005 |
| OLFR13      | -3.7016678 |
| OLFR130     | -3.914447  |
| OLFR1300-PS | -4.480224  |
| OLFR1302    | -6.236945  |
| OLFR1303    | -4.6127014 |
| OLFR1306    | -2.6706738 |
| OLFR1307    | -2.190363  |
| OLFR1308    | -4.8453803 |
| OLFR131     | -4.8950334 |
| OLFR1310    | -3.2433088 |
| OLFR1311    | -6.3280973 |

|          |            |
|----------|------------|
| OLFR1313 | -6.0218296 |
| OLFR1314 | -5.5574493 |
| OLFR1316 | -2.9294395 |
| OLFR1318 | -3.1665165 |
| OLFR132  | -7.3513885 |
| OLFR1320 | -4.2847986 |
| OLFR1321 | -4.6411743 |
| OLFR1322 | -5.3284945 |
| OLFR1323 | -4.899122  |
| OLFR1324 | -3.1842089 |
| OLFR1325 | -4.938958  |
| OLFR1328 | -5.658992  |
| OLFR1329 | -2.2291818 |
| OLFR133  | -5.4720182 |
| OLFR1330 | -5.183936  |
| OLFR1333 | -9.698632  |
| OLFR1335 | -5.3824196 |
| OLFR1336 | -5.391307  |
| OLFR1337 | -4.7327166 |
| OLFR1338 | -3.975735  |
| OLFR1339 | -3.7143974 |
| OLFR134  | -1.9185731 |
| OLFR1340 | -4.4965153 |
| OLFR1341 | -3.4651046 |
| OLFR1342 | -5.884499  |
| OLFR1344 | -4.9921155 |
| OLFR1346 | -5.3200383 |
| OLFR1347 | -1.6408527 |
| OLFR1348 | -6.187012  |
| OLFR135  | -5.5281525 |
| OLFR1351 | -5.1473465 |
| OLFR1352 | -4.7467136 |
| OLFR1354 | -3.423376  |
| OLFR1358 | -3.5854547 |
| OLFR136  | -2.7790542 |
| OLFR1360 | -7.0919456 |
| OLFR1361 | -3.6763535 |
| OLFR1362 | -5.5808134 |
| OLFR1364 | -5.917015  |
| OLFR1366 | -2.041961  |
| OLFR1367 | -3.9543881 |
| OLFR137  | -4.8711023 |
| OLFR1370 | -3.5825465 |
| OLFR1377 | -4.1920314 |
| OLFR1378 | -5.680814  |

|          |            |
|----------|------------|
| OLFR138  | -3.3706717 |
| OLFR1382 | -2.9789805 |
| OLFR1383 | -3.8241224 |
| OLFR1385 | -4.891505  |
| OLFR1386 | -2.1926045 |
| OLFR1387 | -2.9300153 |
| OLFR1388 | -3.4516377 |
| OLFR1389 | -1.5117521 |
| OLFR1390 | -1.2213647 |
| OLFR1393 | -2.6331105 |
| OLFR1394 | -3.1204638 |
| OLFR1395 | -1.8267434 |
| OLFR1396 | -1.5744491 |
| OLFR1404 | -2.7990744 |
| OLFR1406 | -2.0604506 |
| OLFR1411 | -4.581085  |
| OLFR1414 | -5.452466  |
| OLFR1415 | -6.331277  |
| OLFR1416 | -1.2605841 |
| OLFR1417 | -1.6363263 |
| OLFR1418 | -5.3621507 |
| OLFR1419 | -2.758438  |
| OLFR142  | -3.8004456 |
| OLFR1420 | -4.259772  |
| OLFR1423 | -6.207452  |
| OLFR1424 | -3.9188254 |
| OLFR1425 | -4.494418  |
| OLFR1426 | -1.1222522 |
| OLFR1427 | -3.0970438 |
| OLFR1433 | -5.6314554 |
| OLFR1436 | -2.9609716 |
| OLFR1440 | -1.6845984 |
| OLFR1441 | -4.2080083 |
| OLFR1442 | -3.998749  |
| OLFR1444 | -3.0962467 |
| OLFR1445 | -5.1644826 |
| OLFR1446 | -3.359533  |
| OLFR1448 | -6.3916044 |
| OLFR1449 | -3.3841634 |
| OLFR145  | -3.5675647 |
| OLFR1450 | -3.3245025 |
| OLFR1451 | -7.5804114 |
| OLFR1454 | -6.907421  |
| OLFR1458 | -2.0226865 |
| OLFR1459 | -4.5984735 |



|             |            |
|-------------|------------|
| OLFR146     | -4.1036015 |
| OLFR1461    | -6.1232176 |
| OLFR1462    | -3.7129884 |
| OLFR1465    | -5.1275682 |
| OLFR147     | -5.595417  |
| OLFR1472    | -2.7987332 |
| OLFR1474    | -4.512265  |
| OLFR1475    | -2.4831371 |
| OLFR148     | -2.333831  |
| OLFR1490    | -7.5262055 |
| OLFR1491    | -3.7981474 |
| OLFR1494    | -2.3955889 |
| OLFR1496    | -4.7052803 |
| OLFR1497    | -3.9935167 |
| OLFR1499    | -2.2893946 |
| OLFR150     | -4.9901605 |
| OLFR1500    | -6.1281366 |
| OLFR1501    | -4.7117734 |
| OLFR1502    | -4.037641  |
| OLFR1504    | -1.9327779 |
| OLFR1507    | -3.5701027 |
| OLFR1508    | -5.0468645 |
| OLFR1509    | -3.170713  |
| OLFR1510    | -1.275635  |
| OLFR1511    | -4.2678127 |
| OLFR1513    | -5.3504186 |
| OLFR152     | -5.4011755 |
| OLFR1532-PS | -4.8858614 |
| OLFR1535    | -3.1900718 |
| OLFR154     | -2.1675603 |
| OLFR155     | -3.9723291 |
| OLFR156     | -4.006955  |
| OLFR157     | -3.5738645 |
| OLFR160     | -6.5053635 |
| OLFR161     | -8.19437   |
| OLFR165     | -1.7500129 |
| OLFR166     | -1.8592138 |
| OLFR167     | -3.421996  |
| OLFR17      | -5.6135077 |
| OLFR170     | -2.8913028 |
| OLFR171     | -3.0484905 |
| OLFR175-PS1 | -3.0524204 |
| OLFR176     | -2.9927483 |
| OLFR178     | -4.81559   |
| OLFR181     | -3.3973343 |

|             |            |
|-------------|------------|
| OLFR183     | -4.3327584 |
| OLFR186     | -5.4122324 |
| OLFR187     | -3.825739  |
| OLFR19      | -4.9452477 |
| OLFR190     | -4.462944  |
| OLFR193     | -2.6522527 |
| OLFR194     | -3.1017988 |
| OLFR195     | -3.590829  |
| OLFR196     | -5.4641237 |
| OLFR197     | -1.2309391 |
| OLFR199     | -4.0482707 |
| OLFR2       | -3.0899107 |
| OLFR20      | -4.615279  |
| OLFR203     | -1.2142537 |
| OLFR204     | -5.702698  |
| OLFR205     | -2.6803567 |
| OLFR206     | -2.265892  |
| OLFR207     | -3.2622328 |
| OLFR208     | -6.03832   |
| OLFR211     | -0.6857588 |
| OLFR212     | -3.8833992 |
| OLFR213     | -3.2472136 |
| OLFR218     | -3.456799  |
| OLFR220     | -1.5206542 |
| OLFR221     | -5.2895617 |
| OLFR222     | -4.9376564 |
| OLFR223     | -4.0219803 |
| OLFR225     | -3.181806  |
| OLFR228     | -2.0874543 |
| OLFR229     | -3.041034  |
| OLFR22-PS1  | -2.1197789 |
| OLFR23      | -5.3039885 |
| OLFR231     | -3.697639  |
| OLFR235     | -2.8518767 |
| OLFR237-PS1 | -5.426551  |
| OLFR24      | -4.809211  |
| OLFR242     | -2.9401853 |
| OLFR247     | -6.3025084 |
| OLFR25      | -3.123186  |
| OLFR250     | -6.487712  |
| OLFR255     | -4.774151  |
| OLFR26      | -5.003907  |
| OLFR262     | -2.7808478 |
| OLFR263     | -1.8232355 |
| OLFR267     | -3.0809524 |

|            |            |
|------------|------------|
| OLFR27     | -2.216139  |
| OLFR270    | -5.5234165 |
| OLFR272    | -5.2787676 |
| OLFR275    | -5.911295  |
| OLFR279    | -4.4875965 |
| OLFR281    | -6.953697  |
| OLFR282    | -5.6142683 |
| OLFR283    | -6.6456947 |
| OLFR284    | -3.7755005 |
| OLFR285    | -1.681256  |
| OLFR286    | -3.1749592 |
| OLFR288    | -3.3276842 |
| OLFR290    | -2.4469302 |
| OLFR291    | -3.2499418 |
| OLFR293    | -1.507988  |
| OLFR294    | -2.4318538 |
| OLFR297    | -5.129754  |
| OLFR299    | -3.0765529 |
| OLFR29-PS1 | -3.0823164 |
| OLFR3      | -3.0713236 |
| OLFR30     | -1.4641404 |
| OLFR301    | -3.6623118 |
| OLFR303    | -4.155739  |
| OLFR304    | -3.500463  |
| OLFR305    | -3.7804537 |
| OLFR307    | -6.3433723 |
| OLFR308    | -6.076254  |
| OLFR309    | -4.491317  |
| OLFR310    | -5.143984  |
| OLFR312    | -1.9830806 |
| OLFR314    | -4.4479146 |
| OLFR317    | -3.2774332 |
| OLFR318    | -1.8771868 |
| OLFR32     | -6.3168373 |
| OLFR320    | -2.4985194 |
| OLFR322    | -2.402016  |
| OLFR323    | -3.598803  |
| OLFR328    | -5.3319397 |
| OLFR33     | -2.4394135 |
| OLFR330    | -3.0963764 |
| OLFR331    | -3.1872408 |
| OLFR332    | -4.8621626 |
| OLFR338    | -4.49327   |
| OLFR339    | -4.293194  |
| OLFR340    | -3.3181677 |

|            |            |
|------------|------------|
| OLFR341    | -3.5386589 |
| OLFR342    | -2.4502463 |
| OLFR344    | -4.8836    |
| OLFR345    | -6.460149  |
| OLFR346    | -2.5345516 |
| OLFR347    | -2.4664407 |
| OLFR348    | -5.4343433 |
| OLFR350    | -1.7137794 |
| OLFR351    | -5.046442  |
| OLFR352    | -4.9128456 |
| OLFR354    | -5.6599846 |
| OLFR355    | -4.007475  |
| OLFR356    | -5.71111   |
| OLFR357    | -5.070463  |
| OLFR358    | -4.675497  |
| OLFR360    | -2.2585049 |
| OLFR361    | -2.817996  |
| OLFR362    | -2.5033748 |
| OLFR365    | -4.2321234 |
| OLFR367-PS | -3.6901553 |
| OLFR368    | -5.981045  |
| OLFR370    | -2.8692222 |
| OLFR372    | -4.192444  |
| OLFR374    | -3.4809813 |
| OLFR376    | -2.893803  |
| OLFR38     | -6.0179596 |
| OLFR380    | -5.008568  |
| OLFR381    | -2.965786  |
| OLFR382    | -5.3784723 |
| OLFR384    | -2.077096  |
| OLFR385    | -2.9184976 |
| OLFR389    | -1.3581238 |
| OLFR39     | -5.652604  |
| OLFR390    | -5.332155  |
| OLFR391-PS | -2.601549  |
| OLFR393    | -3.4713013 |
| OLFR394    | -2.9281514 |
| OLFR395    | -2.7791321 |
| OLFR397    | -3.6396976 |
| OLFR398    | -5.516702  |
| OLFR399    | -3.2733736 |
| OLFR401    | -2.6419902 |
| OLFR402    | -5.4381175 |
| OLFR403    | -2.4732132 |
| OLFR406    | -5.297319  |

|             |            |
|-------------|------------|
| OLFR411     | -2.5218372 |
| OLFR412     | -2.7104936 |
| OLFR418-PS1 | -4.3484726 |
| OLFR420     | -3.6283352 |
| OLFR426     | -3.371775  |
| OLFR427     | -5.5757456 |
| OLFR429     | -4.6180725 |
| OLFR43      | -3.396314  |
| OLFR430     | -4.63131   |
| OLFR432     | -4.8728514 |
| OLFR433     | -6.310345  |
| OLFR434     | -2.9971876 |
| OLFR437     | -3.0543082 |
| OLFR441     | -5.1555614 |
| OLFR444     | -3.7785861 |
| OLFR446     | -6.9400845 |
| OLFR447     | -5.4396086 |
| OLFR448     | -2.2778826 |
| OLFR449     | -2.8562894 |
| OLFR450     | -3.247855  |
| OLFR452     | -3.0222347 |
| OLFR455     | -3.2581031 |
| OLFR456     | -2.106014  |
| OLFR458     | -4.4491234 |
| OLFR46      | -4.745468  |
| OLFR460     | -3.3512175 |
| OLFR461     | -5.5274076 |
| OLFR462     | -2.8162417 |
| OLFR463     | -2.4290822 |
| OLFR464     | -4.2436504 |
| OLFR466     | -6.250979  |
| OLFR467     | -4.739443  |
| OLFR469     | -1.8314843 |
| OLFR47      | -1.7041259 |
| OLFR470     | -2.9478436 |
| OLFR472     | -2.44961   |
| OLFR474     | -1.4643307 |
| OLFR476     | -4.360242  |
| OLFR478     | -4.339168  |
| OLFR479     | -4.6906867 |
| OLFR480     | -5.11604   |
| OLFR481     | -7.084715  |
| OLFR484     | -3.2935572 |
| OLFR485     | -3.9432857 |
| OLFR486     | -1.4412324 |

|         |            |
|---------|------------|
| OLFR487 | -5.723073  |
| OLFR49  | -5.1832676 |
| OLFR490 | -5.8805637 |
| OLFR491 | -4.637042  |
| OLFR492 | -3.3366466 |
| OLFR493 | -2.4858587 |
| OLFR494 | -2.7542746 |
| OLFR495 | -6.4350185 |
| OLFR498 | -3.031637  |
| OLFR5   | -4.0061255 |
| OLFR50  | -5.257789  |
| OLFR502 | -4.1281166 |
| OLFR503 | -2.938096  |
| OLFR508 | -4.139533  |
| OLFR509 | -4.509115  |
| OLFR51  | -2.1527293 |
| OLFR510 | -2.7510087 |
| OLFR512 | -4.8782187 |
| OLFR513 | -1.3966396 |
| OLFR514 | -5.6761208 |
| OLFR516 | -3.4409645 |
| OLFR517 | -3.9279423 |
| OLFR518 | -5.5794616 |
| OLFR52  | -4.634733  |
| OLFR520 | -4.9978447 |
| OLFR524 | -1.5806682 |
| OLFR525 | -3.3614135 |
| OLFR527 | -1.1116805 |
| OLFR53  | -2.7162995 |
| OLFR533 | -2.1874437 |
| OLFR535 | -2.3970783 |
| OLFR538 | -3.8311126 |
| OLFR539 | -3.0438452 |
| OLFR543 | -5.886114  |
| OLFR544 | -0.9955454 |
| OLFR545 | -5.1389556 |
| OLFR547 | -5.80689   |
| OLFR550 | -3.8043778 |
| OLFR551 | -4.0196123 |
| OLFR552 | -3.3216655 |
| OLFR553 | -1.7444563 |
| OLFR554 | -7.3473577 |
| OLFR555 | -5.3017707 |
| OLFR556 | -1.8568254 |
| OLFR557 | -3.2015018 |

|         |            |
|---------|------------|
| OLFR558 | -4.720619  |
| OLFR559 | -3.7909744 |
| OLFR560 | -3.6317902 |
| OLFR561 | -2.2925994 |
| OLFR564 | -3.594659  |
| OLFR566 | -2.8547606 |
| OLFR568 | -1.8962669 |
| OLFR569 | -4.818561  |
| OLFR57  | -1.5615752 |
| OLFR570 | -4.4879236 |
| OLFR571 | -4.8502026 |
| OLFR574 | -6.2155666 |
| OLFR575 | -3.0669274 |
| OLFR577 | -3.8812227 |
| OLFR578 | -4.8371854 |
| OLFR58  | -4.012331  |
| OLFR582 | -6.2893276 |
| OLFR584 | -4.7106576 |
| OLFR586 | -3.6522558 |
| OLFR589 | -1.3580527 |
| OLFR59  | -7.092127  |
| OLFR591 | -3.5161037 |
| OLFR593 | -6.055032  |
| OLFR594 | -3.1649795 |
| OLFR596 | -4.299973  |
| OLFR598 | -6.1031294 |
| OLFR599 | -3.2121787 |
| OLFR6   | -5.3397818 |
| OLFR60  | -3.9430296 |
| OLFR601 | -3.5290167 |
| OLFR605 | -2.1275196 |
| OLFR607 | -4.6090183 |
| OLFR608 | -2.1695783 |
| OLFR61  | -4.44053   |
| OLFR610 | -3.323059  |
| OLFR612 | -2.298015  |
| OLFR615 | -2.8606358 |
| OLFR617 | -4.754406  |
| OLFR618 | -4.7068534 |
| OLFR619 | -6.0299673 |
| OLFR62  | -5.1673326 |
| OLFR620 | -4.9109144 |
| OLFR623 | -4.2921033 |
| OLFR624 | -3.408659  |
| OLFR629 | -2.3879182 |

|         |            |
|---------|------------|
| OLFR63  | -2.7425063 |
| OLFR630 | -4.405511  |
| OLFR631 | -3.1571648 |
| OLFR632 | -8.551832  |
| OLFR635 | -1.400821  |
| OLFR638 | -3.1745162 |
| OLFR639 | -3.7355614 |
| OLFR640 | -4.8666263 |
| OLFR645 | -6.5397053 |
| OLFR646 | -4.822464  |
| OLFR648 | -5.172146  |
| OLFR65  | -3.9753437 |
| OLFR651 | -4.726565  |
| OLFR652 | -5.3110037 |
| OLFR653 | -1.3171327 |
| OLFR655 | -5.6213193 |
| OLFR656 | -2.2676635 |
| OLFR657 | -1.660749  |
| OLFR658 | -3.986141  |
| OLFR659 | -3.0604057 |
| OLFR66  | -6.248142  |
| OLFR661 | -4.280135  |
| OLFR665 | -3.52663   |
| OLFR666 | -5.4118285 |
| OLFR667 | -2.1426203 |
| OLFR668 | -4.0869603 |
| OLFR669 | -2.2683203 |
| OLFR67  | -3.6857448 |
| OLFR670 | -8.195032  |
| OLFR671 | -5.263721  |
| OLFR676 | -5.623675  |
| OLFR678 | -6.6500826 |
| OLFR681 | -2.030635  |
| OLFR683 | -3.4063954 |
| OLFR684 | -5.5296774 |
| OLFR686 | -4.0608454 |
| OLFR687 | -1.8683078 |
| OLFR688 | -3.9673731 |
| OLFR69  | -2.0921774 |
| OLFR690 | -2.6516743 |
| OLFR691 | -6.2232466 |
| OLFR692 | -5.3676176 |
| OLFR693 | -2.5699418 |
| OLFR694 | -1.9527025 |
| OLFR695 | -4.4152517 |



|            |            |
|------------|------------|
| OLFR697    | -4.6785593 |
| OLFR698    | -6.2600484 |
| OLFR699    | -6.1065884 |
| OLFR70     | -4.140787  |
| OLFR700    | -1.9097202 |
| OLFR701    | -5.9862475 |
| OLFR702    | -3.9953961 |
| OLFR703    | -2.2752166 |
| OLFR705    | -4.951089  |
| OLFR706    | -1.3877175 |
| OLFR707    | -4.890355  |
| OLFR71     | -6.511918  |
| OLFR710    | -4.721506  |
| OLFR713    | -3.3683987 |
| OLFR714    | -7.0438213 |
| OLFR715    | -4.663487  |
| OLFR716    | -2.4484997 |
| OLFR720    | -4.636197  |
| OLFR722    | -5.773761  |
| OLFR723    | -5.9195175 |
| OLFR724    | -3.1977901 |
| OLFR726    | -2.4944577 |
| OLFR728    | -3.3371656 |
| OLFR729    | -5.09649   |
| OLFR73     | -1.7055657 |
| OLFR731    | -1.3733878 |
| OLFR732    | -3.3443446 |
| OLFR733    | -2.4496694 |
| OLFR734    | -3.116493  |
| OLFR738    | -2.2236793 |
| OLFR739    | -1.3724847 |
| OLFR74     | -0.8977983 |
| OLFR741    | -4.0747104 |
| OLFR743    | -5.953985  |
| OLFR744    | -1.9179313 |
| OLFR745    | -2.3572166 |
| OLFR747    | -2.1541607 |
| OLFR749    | -7.193883  |
| OLFR75-PS1 | -1.5462451 |
| OLFR76     | -6.8737955 |
| OLFR761    | -4.736795  |
| OLFR763    | -3.940657  |
| OLFR764    | -3.7610073 |
| OLFR767    | -5.235125  |
| OLFR768    | -3.3189914 |

|         |            |
|---------|------------|
| OLFR769 | -3.6490166 |
| OLFR77  | -2.5725298 |
| OLFR770 | -3.769795  |
| OLFR771 | -2.3892264 |
| OLFR772 | -3.37384   |
| OLFR773 | -2.1143305 |
| OLFR774 | -3.477512  |
| OLFR775 | -2.2505534 |
| OLFR776 | -4.2036104 |
| OLFR78  | -2.5777674 |
| OLFR780 | -3.6129804 |
| OLFR784 | -3.4958663 |
| OLFR786 | -3.9116082 |
| OLFR787 | -1.0329773 |
| OLFR788 | -3.495594  |
| OLFR790 | -4.7355595 |
| OLFR791 | -2.315247  |
| OLFR792 | -3.2283978 |
| OLFR794 | -1.8627923 |
| OLFR796 | -1.4938316 |
| OLFR798 | -4.512343  |
| OLFR799 | -3.265247  |
| OLFR8   | -1.7255785 |
| OLFR802 | -3.6641252 |
| OLFR803 | -3.8523245 |
| OLFR804 | -3.5326252 |
| OLFR805 | -2.792113  |
| OLFR806 | -5.125165  |
| OLFR808 | -3.1122384 |
| OLFR809 | -2.5279021 |
| OLFR810 | -1.7716646 |
| OLFR811 | -2.5445826 |
| OLFR813 | -3.8359423 |
| OLFR815 | -4.2598114 |
| OLFR816 | -5.097319  |
| OLFR819 | -4.471176  |
| OLFR820 | -4.650645  |
| OLFR821 | -2.521344  |
| OLFR823 | -4.1861596 |
| OLFR824 | -5.0435524 |
| OLFR826 | -1.7824082 |
| OLFR827 | -3.5755486 |
| OLFR828 | -6.778736  |
| OLFR829 | -4.6398506 |
| OLFR830 | -7.3949804 |

|             |            |
|-------------|------------|
| OLFR835     | -2.4186654 |
| OLFR836     | -7.3777723 |
| OLFR837     | -5.601759  |
| OLFR843     | -3.8811493 |
| OLFR845     | -4.476722  |
| OLFR846     | -2.094017  |
| OLFR847     | -4.5616136 |
| OLFR849     | -5.908963  |
| OLFR850     | -6.7813177 |
| OLFR853     | -3.0231304 |
| OLFR854     | -6.4195185 |
| OLFR855     | -4.337046  |
| OLFR860     | -2.8025613 |
| OLFR866     | -4.841757  |
| OLFR867     | -3.9884384 |
| OLFR869     | -3.226602  |
| OLFR870     | -3.6309493 |
| OLFR871     | -4.2079234 |
| OLFR873     | -5.1482306 |
| OLFR874     | -4.0301247 |
| OLFR876     | -4.1013327 |
| OLFR877     | -5.3916254 |
| OLFR878     | -1.1826613 |
| OLFR884     | -2.3876307 |
| OLFR887     | -4.092169  |
| OLFR888     | -2.698884  |
| OLFR889     | -1.1746123 |
| OLFR890     | -2.540849  |
| OLFR891     | -3.9249365 |
| OLFR894     | -1.6481953 |
| OLFR895     | -3.8177555 |
| OLFR899     | -5.0050383 |
| OLFR9       | -3.7790668 |
| OLFR90      | -3.6386878 |
| OLFR901     | -1.989156  |
| OLFR902     | -1.0785353 |
| OLFR904     | -5.6046453 |
| OLFR905     | -4.443569  |
| OLFR906     | -5.701433  |
| OLFR907     | -4.9661865 |
| OLFR908     | -4.0562954 |
| OLFR910     | -5.588648  |
| OLFR911-PS1 | -3.8211734 |
| OLFR912     | -2.3732991 |
| OLFR913     | -4.490458  |

|             |            |
|-------------|------------|
| OLFR914     | -3.8856723 |
| OLFR915     | -3.0323405 |
| OLFR916     | -3.0606368 |
| OLFR917     | -4.5607753 |
| OLFR918     | -5.242674  |
| OLFR919     | -3.3530483 |
| OLFR92      | -2.233837  |
| OLFR920     | -1.5166945 |
| OLFR921     | -5.270172  |
| OLFR922     | -7.940523  |
| OLFR923     | -3.75012   |
| OLFR924     | -2.3684323 |
| OLFR926     | -1.6216407 |
| OLFR930     | -2.838336  |
| OLFR933     | -5.832039  |
| OLFR934     | -3.8521152 |
| OLFR936     | -1.9644687 |
| OLFR938     | -2.5532439 |
| OLFR94      | -3.7448773 |
| OLFR943     | -2.8536665 |
| OLFR945     | -5.091445  |
| OLFR947-PS1 | -2.4100811 |
| OLFR948     | -2.7357314 |
| OLFR95      | -6.0382385 |
| OLFR951     | -3.8310404 |
| OLFR954     | -3.9973395 |
| OLFR955     | -2.3695073 |
| OLFR957     | -6.726713  |
| OLFR958     | -2.9866593 |
| OLFR959     | -2.1834347 |
| OLFR961     | -5.58414   |
| OLFR963     | -5.1461267 |
| OLFR965     | -4.293868  |
| OLFR969     | -3.455248  |
| OLFR971     | -5.3976912 |
| OLFR974     | -3.8312817 |
| OLFR975     | -6.8269186 |
| OLFR976     | -4.5396495 |
| OLFR978     | -3.4946854 |
| OLFR979     | -6.879799  |
| OLFR98      | -2.0273688 |
| OLFR980     | -7.1628475 |
| OLFR981     | -4.5895977 |
| OLFR982     | -5.3119216 |
| OLFR984     | -5.5972166 |

|         |            |
|---------|------------|
| OLFR985 | -5.9555397 |
| OLFR986 | -6.996829  |
| OLFR988 | -2.2637587 |
| OLFR99  | -3.04988   |
| OLFR992 | -1.5556939 |
| OLFR994 | -4.0144444 |
| OLFR995 | -4.037789  |
| OLFR996 | -3.0278897 |
| OLFR998 | -5.3345675 |
| OMP     | -1.7237525 |
| OMT2A   | -11.938915 |
| OOEP    | -3.773709  |
| OOG2    | -3.1977143 |
| OOG3    | -3.0005548 |
| OOG4    | -1.7319083 |
| OOSP1   | -2.1946263 |
| OOSP2   | -1.7035751 |
| OPCML   | -2.6757503 |
| OPN1MW  | -3.2414408 |
| OPN1SW  | -1.142427  |
| OPN4    | -3.2861571 |
| OPN5    | -4.429599  |
| OPRD1   | -5.388998  |
| OPRK1   | -5.0780706 |
| OPRL1   | -3.527539  |
| ORLY    | -3.8584716 |
| OSBP2   | -2.2937    |
| OSTN    | -4.693007  |
| OTOA    | -6.2138844 |
| OTOG    | -2.9822748 |
| OTOGL   | -2.6526399 |
| OTOL1   | -3.8050475 |
| OTOP3   | -3.70848   |
| OTOR    | -3.731528  |
| OTOS    | -3.2945704 |
| OTP     | -4.4293942 |
| OTUB1   | -0.6966162 |
| OTUD6A  | -5.0297575 |
| OTUD7B  | -3.020066  |
| OTX2    | -2.5262764 |
| OVOL1   | -4.3659754 |
| OXCT2A  | -3.29638   |
| OXCT2B  | -1.4276977 |
| OXT     | -1.0713301 |
| P2RX2   | -2.0487633 |

|             |            |
|-------------|------------|
| P2RX6       | -4.53321   |
| P2RY4       | -5.2755384 |
| P4HA3       | -4.2708197 |
| PABPC1L2B-F | -3.2079859 |
| PABPC4L     | -1.0858026 |
| PABPC5      | -2.2533398 |
| PABPC6      | -6.0505505 |
| PADI6       | -3.6715355 |
| PAK7        | -1.5846958 |
| PALM3       | -2.1636283 |
| PANX2       | -4.1431923 |
| PAPL        | -3.4480023 |
| PAPLN       | -1.1631305 |
| PAPOLB      | -4.030156  |
| PAPSS1      | -0.7376909 |
| PARD3B      | -4.4029226 |
| PARD3BOS1   | -5.2142067 |
| PARPBP      | -3.815793  |
| PAX2        | -4.8270283 |
| PAX3        | -2.2777815 |
| PAX4        | -5.0038943 |
| PAX5        | -3.6401386 |
| PAX6OS1     | -3.3009467 |
| PAX7        | -3.2191281 |
| PAX8        | -5.2169447 |
| PAX9        | -3.1446285 |
| PBP2        | -1.569154  |
| PBSN        | -4.0004444 |
| PBX4        | -5.3766127 |
| PCDH10      | -5.779232  |
| PCDH11X     | -2.978423  |
| PCDH15      | -4.135721  |
| PCDH8       | -2.4037974 |
| PCDH9       | -3.5167246 |
| PCDHA11     | -5.072406  |
| PCDHA12     | -4.6141863 |
| PCDHA4      | -3.0310109 |
| PCDHA8      | -0.7569714 |
| PCDHA9      | -4.5182743 |
| PCDHAC1     | -5.321674  |
| PCDHB1      | -3.2649713 |
| PCDHB12     | -1.363586  |
| PCDHB19     | -4.5826263 |
| PCDHB2      | -3.1622531 |
| PCDHGB1     | -2.0144055 |

|         |            |
|---------|------------|
| PCLO    | -3.5561092 |
| PCSK1N  | -2.744006  |
| PCSK2   | -3.0121894 |
| PCSK4   | -1.7697039 |
| PCYT1B  | -2.7775893 |
| PDC     | -2.670245  |
| PDCL2   | -5.080019  |
| PDE10A  | -3.2340393 |
| PDE11A  | -3.587798  |
| PDE1C   | -5.8335686 |
| PDE3A   | -2.0641804 |
| PDE5A   | -2.6189656 |
| PDE6A   | -2.6591148 |
| PDE6C   | -4.9292707 |
| PDGFD   | -2.2745297 |
| PDHA2   | -5.777896  |
| PDK2    | -1.1901898 |
| PDX1    | -3.035834  |
| PDYN    | -2.8740444 |
| PDZD7   | -3.4896998 |
| PDZD9   | -4.3230743 |
| PDZRN4  | -4.3670464 |
| PEA15B  | -3.81331   |
| PEBP4   | -1.3407793 |
| PEG10   | -2.4319224 |
| PEG12   | -2.3179586 |
| PERM1   | -3.0157351 |
| PET100  | -3.0768452 |
| PEX5L   | -1.8045933 |
| PFN3    | -5.0444174 |
| PFN4    | -4.8692327 |
| PFPL    | -4.1398916 |
| PGA5    | -5.187845  |
| PGBD1   | -4.2701235 |
| PGC     | -1.909709  |
| PGK2    | -4.038516  |
| PGLYRP3 | -2.0556817 |
| PGLYRP4 | -0.8815088 |
| PGPEP1L | -5.0330453 |
| PGR     | -1.894995  |
| PHACTR3 | -3.8840914 |
| PHF20L1 | -0.6453853 |
| PHGR1   | -3.2241213 |
| PHLDA2  | -2.4702604 |
| PHOX2A  | -4.484223  |

|           |            |
|-----------|------------|
| PHOX2B    | -1.9452221 |
| PHTF1OS   | -2.7460697 |
| PHYHIP    | -6.0193357 |
| PIBF1     | -2.639569  |
| PIH1D3    | -0.7635047 |
| PIK3C2B   | -3.5579958 |
| PIKFYVE   | -1.9834964 |
| PILRB1    | -1.7915988 |
| PINC      | -4.4570684 |
| PIP       | -4.232048  |
| PIP5K1BOS | -4.7615094 |
| PIP5KL1   | -2.8702087 |
| PIRT      | -2.4185479 |
| PISD-PS2  | -2.531009  |
| PITX1     | -3.3695016 |
| PITX2     | -3.316602  |
| PITX3     | -2.9770565 |
| PIWIL2    | -3.1566834 |
| PKD1L1    | -3.756829  |
| PKD2L1    | -6.9011974 |
| PKDREJ    | -3.1743474 |
| PKHD1     | -2.0587027 |
| PKHD1L1   | -2.5788631 |
| PLA2G2A   | -3.4014995 |
| PLA2G2D   | -0.7288144 |
| PLA2G2E   | -2.261996  |
| PLA2G2F   | -3.0647662 |
| PLA2G3    | -5.681224  |
| PLA2G4C   | -2.0402443 |
| PLA2G4D   | -4.638119  |
| PLA2G4E   | -3.0910673 |
| PLA2G5    | -3.9733086 |
| PLA2R1    | -2.2786496 |
| PLAC1     | -4.4127474 |
| PLAC8L1   | -2.955262  |
| PLAG1     | -4.215987  |
| PLCB2     | -1.781502  |
| PLCZ1     | -2.7049537 |
| PLD6      | -4.167138  |
| PLDI      | -6.2413664 |
| PLEKHG1   | -2.9471798 |
| PLEKHN1   | -5.281152  |
| PLK4      | -2.228648  |
| PLLP      | -2.645696  |
| PMEL      | -1.883182  |



|           |            |
|-----------|------------|
| PMFBP1    | -1.8184559 |
| PMIS2     | -6.502198  |
| PMP2      | -1.7861431 |
| PNLIP     | -3.267707  |
| PNLIPRP2  | -3.1417632 |
| PNMA3     | -2.1499922 |
| PNMAL1    | -3.8046067 |
| PNOC      | -2.7605634 |
| PNPLA5    | -2.4112625 |
| POLK      | -0.8650034 |
| POLR3F    | -1.1789763 |
| POLR3H    | -3.183747  |
| POM121L12 | -8.132439  |
| POM121L2  | -3.9800067 |
| POMC      | -0.9699221 |
| POTEG     | -5.176588  |
| POU1F1    | -2.9225535 |
| POU3F1    | -1.7767196 |
| POU3F2    | -5.9875884 |
| POU3F3OS  | -1.624078  |
| POU3F4    | -2.8261435 |
| POU4F3    | -3.111368  |
| POU5F1    | -2.5163586 |
| PP2D1     | -2.9253938 |
| PPAPDC1A  | -4.431254  |
| PPARGC1B  | -0.869416  |
| PPEF1     | -3.3066664 |
| PPFIA2    | -2.9816651 |
| PPIE      | -0.8559592 |
| PPP1R12B  | -1.7448428 |
| PPP1R17   | -3.0601497 |
| PPP1R27   | -1.2146993 |
| PPP1R3FOS | -2.656006  |
| PPP2R2COS | -1.9977098 |
| PPP2R3A   | -2.9021466 |
| PPP3R2    | -3.1643798 |
| PPP6R2    | -0.9918556 |
| PRAMEF12O | -3.6235828 |
| PRAMEL    | -5.410907  |
| PRAMEL1   | -3.861479  |
| PRAMEL7   | -7.4139624 |
| PRAP1     | -4.305331  |
| PRB1      | -4.239977  |
| PRDM11    | -2.1022437 |
| PRDM12    | -2.7049153 |

|           |            |
|-----------|------------|
| PRDM14    | -2.3712735 |
| PRDM15    | -2.7494488 |
| PRDM9     | -2.6921663 |
| PRDX6B    | -1.3564694 |
| PRG2      | -2.1837466 |
| PRICKLE2  | -5.2964554 |
| PRICKLE4  | -5.9944143 |
| PRKAB1    | -1.2852387 |
| PRKAG2OS1 | -4.987216  |
| PRKAG3    | -3.3217082 |
| PRL2B1    | -5.331045  |
| PRL2C5    | -3.7170858 |
| PRL3A1    | -6.088008  |
| PRL3B1    | -2.493988  |
| PRL3C1    | -4.16755   |
| PRL3D1    | -2.4337997 |
| PRL3D2    | -2.734783  |
| PRL4A1    | -4.550893  |
| PRL6A1    | -2.3950381 |
| PRL7A1    | -5.6884766 |
| PRL7A2    | -3.185488  |
| PRL7C1    | -3.6079452 |
| PRL7D1    | -1.9690659 |
| PRL8A6    | -3.426099  |
| PRL8A8    | -3.1489851 |
| PRL8A9    | -2.0006144 |
| PRLH      | -2.9236794 |
| PRLHR     | -1.358552  |
| PRM1      | -1.8275089 |
| PRM2      | -3.6953325 |
| PRM3      | -3.343301  |
| PRMT8     | -4.777812  |
| PROCA1    | -3.8112261 |
| PROKR1    | -2.5047162 |
| PROKR2    | -2.882614  |
| PROL1     | -2.901943  |
| PROM2     | -2.3654888 |
| PROP1     | -3.203834  |
| PROSER1   | -2.2871904 |
| PRP2      | -1.9757044 |
| PRPH2     | -3.465856  |
| PRPMP5    | -3.5237925 |
| PRPS1L1   | -2.851855  |
| PRR19     | -4.8017616 |
| PRR27     | -1.7780719 |

|         |            |
|---------|------------|
| PRR30   | -5.864298  |
| PRR32   | -2.4458091 |
| PRR33   | -2.0072546 |
| PRR9    | -1.5756595 |
| PRRG4   | -1.6293821 |
| PRRT2   | -6.067554  |
| PRRT4   | -3.3976135 |
| PRRXL1  | -3.9255946 |
| PRSS16  | -3.6612911 |
| PRSS2   | -3.3965929 |
| PRSS22  | -3.3364365 |
| PRSS27  | -2.1732302 |
| PRSS28  | -5.572902  |
| PRSS30  | -3.015337  |
| PRSS32  | -2.6495266 |
| PRSS33  | -2.7837253 |
| PRSS35  | -2.1601696 |
| PRSS39  | -2.9693198 |
| PRSS40  | -1.8406796 |
| PRSS41  | -1.9310031 |
| PRSS42  | -6.7937956 |
| PRSS44  | -5.398526  |
| PRSS45  | -3.1935973 |
| PRSS46  | -3.2059247 |
| PRSS52  | -4.578925  |
| PRSS54  | -6.876036  |
| PRSS55  | -2.002014  |
| PRSS56  | -3.591855  |
| PRSS58  | -6.1165276 |
| PRUNE   | -1.6269495 |
| PRUNE2  | -2.65522   |
| PSD2    | -3.3195083 |
| PSG18   | -4.611459  |
| PSG19   | -3.5584707 |
| PSG20   | -1.1769097 |
| PSG21   | -4.3406982 |
| PSG22   | -2.903414  |
| PSG25   | -3.9792633 |
| PSG27   | -3.4018705 |
| PSG28   | -4.5039325 |
| PSG29   | -3.0640275 |
| PSMA8   | -2.0353677 |
| PSMB11  | -5.4522114 |
| PSMC3IP | -3.834441  |
| PSPN    | -2.4683876 |

|           |            |
|-----------|------------|
| PSTK      | -1.0853362 |
| PTCD1     | -1.7071807 |
| PTCH1     | -2.4038134 |
| PTCHD2    | -3.6033463 |
| PTCRA     | -6.68629   |
| PTF1A     | -6.21486   |
| PTGDR     | -1.8329253 |
| PTGDR2    | -5.6870995 |
| PTHLH     | -1.2546201 |
| PTK6      | -1.367435  |
| PTPN20    | -6.096821  |
| PTPRH     | -3.2733128 |
| PTPRM     | -1.9281874 |
| PTPRN     | -5.133678  |
| PTPRN2    | -2.7777267 |
| PTPRQ     | -4.9018583 |
| PTPRR     | -2.678773  |
| PTX4      | -1.2733519 |
| PVALB     | -2.3319812 |
| PVT1      | -1.0008976 |
| PXT1      | -4.6267347 |
| PYROXD1   | -1.2457848 |
| QRFP      | -5.4019756 |
| QRFPR     | -3.8714614 |
| QTRT1     | -2.57254   |
| R3HDML    | -3.2480018 |
| RAB11FIP2 | -6.457923  |
| RAB11FIP4 | -5.8638496 |
| RAB26     | -1.6075387 |
| RAB9B     | -1.387095  |
| RAD21L    | -1.4718819 |
| RAD51AP2  | -1.1734273 |
| RAD9A     | -0.7703588 |
| RAET1A    | -3.3269823 |
| RAG1      | -1.3468409 |
| RAG2      | -1.2557309 |
| RALYL     | -3.0097957 |
| RANBP17   | -3.4986343 |
| RANBP3L   | -2.3446107 |
| RAP1GAP2  | -2.8155348 |
| RASAL2    | -2.2272022 |
| RASGEF1C  | -2.6976745 |
| RASGRF2   | -2.919597  |
| RASL10B   | -2.7906241 |
| RASSF10   | -1.4808495 |

|          |            |
|----------|------------|
| RAVER2   | -1.2369375 |
| RAX      | -7.5619965 |
| RB1CC1   | -4.009852  |
| RBAKDN   | -3.1764205 |
| RBBP8NL  | -1.2350013 |
| RBM15B   | -1.4907265 |
| RBM20    | -3.4791617 |
| RBM38    | -2.7040327 |
| RBM46    | -1.8964269 |
| RBM46OS  | -3.0951319 |
| RBMY     | -3.128168  |
| RBP2     | -4.929166  |
| RCOR2    | -4.864549  |
| RCVRN    | -2.447382  |
| RD3L     | -1.9863219 |
| RDH18-PS | -3.8225238 |
| RDH19    | -3.8687449 |
| RDH8     | -3.8063357 |
| RECQL4   | -1.5825782 |
| REEP2    | -4.25109   |
| REG2     | -4.7167206 |
| REG3A    | -5.3763747 |
| REG3D    | -2.3217852 |
| REL      | -5.0426254 |
| RELL2    | -1.7925715 |
| REM2     | -3.7990246 |
| RERGL    | -2.3221166 |
| REX2     | -3.0760777 |
| RFC3     | -0.980252  |
| RFESD    | -1.3721883 |
| RFPL3S   | -2.504188  |
| RFPL4    | -2.9200938 |
| RFPL4B   | -3.689995  |
| RFX4     | -3.2219346 |
| RFX8     | -1.7339826 |
| RGAG1    | -6.8226757 |
| RGMA     | -2.3157554 |
| RGR      | -4.4949474 |
| RGS13    | -4.136966  |
| RGS21    | -3.2470436 |
| RGS7     | -3.8870273 |
| RGS8     | -3.8264008 |
| RGS9BP   | -2.2042599 |
| RGSL1    | -0.9683061 |
| RHAG     | -3.5221994 |

|         |            |
|---------|------------|
| RHBDD1  | -2.9819405 |
| RHBDL2  | -6.0489626 |
| RHCG    | -4.4426413 |
| RHO     | -2.4530551 |
| RHOH    | -3.1744297 |
| RHOX1   | -1.3611977 |
| RHOX10  | -5.6053963 |
| RHOX11  | -3.5252228 |
| RHOX12  | -5.651334  |
| RHOX13  | -4.6938496 |
| RHOX2C  | -4.0972366 |
| RHOX2E  | -3.9594889 |
| RHOX2F  | -1.5435867 |
| RHOX2H  | -4.200887  |
| RHOX3E  | -3.9885247 |
| RHOX3F  | -3.7599685 |
| RHOX3G  | -4.217631  |
| RHOX3H  | -2.8776965 |
| RHOX4A  | -7.102749  |
| RHOX4E  | -5.2757206 |
| RHOX4G  | -4.701936  |
| RHOX6   | -3.1293938 |
| RHOX7   | -3.2633932 |
| RHPN2   | -1.5474896 |
| RIBC2   | -3.3188531 |
| RIC3    | -1.5869381 |
| RIMBP2  | -2.8931935 |
| RIMBP3  | -4.2347393 |
| RIMKLB  | -1.1842325 |
| RIMS1   | -4.772647  |
| RIMS2   | -2.0101824 |
| RIPPLY2 | -4.7200212 |
| RLBP1   | -3.7497106 |
| RLN1    | -3.9173055 |
| RLN3    | -3.598702  |
| RLTPR   | -0.9826446 |
| RNASE1  | -5.1709027 |
| RNASE12 | -1.7229862 |
| RNF112  | -2.9200578 |
| RNF122  | -2.3657598 |
| RNF151  | -5.7330847 |
| RNF165  | -1.4309483 |
| RNF180  | -3.0688214 |
| RNF183  | -2.2242165 |
| RNF212  | -2.5924618 |

|            |            |
|------------|------------|
| ROBO3      | -1.6397061 |
| ROPN1      | -2.8680522 |
| ROR1       | -1.8878822 |
| RORB       | -2.7774644 |
| RP1L1      | -2.471543  |
| RPE65      | -5.563098  |
| RPH3A      | -3.508847  |
| RPL10L     | -3.6023521 |
| RPP25      | -6.4818773 |
| RPRML      | -2.700414  |
| RPTN       | -6.907871  |
| RRH        | -2.3576422 |
| RSG1       | -5.967146  |
| RSPH6A     | -5.078081  |
| RSPO4      | -3.862266  |
| RSRC1      | -1.6757414 |
| RTBDN      | -2.826092  |
| RTCA       | -1.0243578 |
| RTL1       | -7.064253  |
| RUNX2      | -2.927674  |
| RWDD2A     | -4.851553  |
| RXFP2      | -2.224088  |
| RXFP3      | -2.980757  |
| RXFP4      | -2.764296  |
| S100A2     | -3.2839563 |
| S100A5     | -1.594666  |
| S100Z      | -2.4051583 |
| SAG        | -1.7812204 |
| SALL3      | -2.1646855 |
| SAMD11     | -4.493487  |
| SAMD15     | -2.3124976 |
| SAMD3      | -2.8343048 |
| SAMD7      | -3.1862595 |
| SAMT2      | -3.319751  |
| SAMT3      | -1.5860224 |
| SARM1      | -3.518775  |
| SATB2      | -2.619034  |
| SATL1      | -2.865425  |
| SBK1       | -2.6045954 |
| SBK2       | -3.8917575 |
| SBP        | -2.7027993 |
| SBPL       | -4.5822325 |
| SCARLETLTR | -6.6272516 |
| SCG3       | -2.1416078 |
| SCGB1B19   | -5.9445715 |

|           |            |
|-----------|------------|
| SCGB1B2   | -6.373408  |
| SCGB1B20  | -4.0826564 |
| SCGB1B24  | -3.059641  |
| SCGB1B27  | -1.0944457 |
| SCGB1B3   | -2.4954567 |
| SCGB1B30  | -0.7277818 |
| SCGB1B7   | -3.6071484 |
| SCGB2B2   | -2.6480331 |
| SCGB2B20  | -1.253042  |
| SCGB2B21  | -3.1143172 |
| SCGB2B24  | -1.3249295 |
| SCGB2B26  | -4.792679  |
| SCGB2B27  | -4.8756256 |
| SCGB2B7   | -3.0299454 |
| SCLT1     | -1.0258665 |
| SCML1     | -3.291329  |
| SCML2     | -6.103098  |
| SCN1A     | -3.444766  |
| SCN2A1    | -3.2453456 |
| SCN4A     | -1.6762633 |
| SCN4B     | -3.238884  |
| SCN9A     | -1.8513603 |
| SCP2D1    | -4.403512  |
| SCRT2     | -2.0845716 |
| SCT       | -2.9323187 |
| SDHD      | -2.6123695 |
| SDK2      | -1.7042925 |
| SDR16C6   | -3.798842  |
| SEC14L5   | -3.826993  |
| SEC22C    | -3.2246306 |
| SECTM1A   | -1.7251592 |
| SEL1L2    | -1.3581672 |
| SEMA3D    | -2.2831876 |
| SEMA5B    | -3.823058  |
| SEMA6C    | -2.1595988 |
| SERAC1    | -1.3070977 |
| SERPINA12 | -1.8800845 |
| SERPINA1F | -2.7286515 |
| SERPINA3A | -4.7503643 |
| SERPINA3J | -3.1994853 |
| SERPINA5  | -4.23606   |
| SERPINB12 | -3.8427145 |
| SERPINB1C | -3.5288253 |
| SERPINB3A | -6.0044847 |
| SERPINB3B | -5.9898205 |



|           |            |
|-----------|------------|
| SERPINB3D | -5.9227734 |
| SERPINB6D | -4.9050126 |
| SERPINB6E | -4.5307302 |
| SERPINB9C | -4.6941752 |
| SERPINB9D | -1.3890688 |
| SERPINB9E | -2.7958498 |
| SERPINB9F | -2.9738066 |
| SERPINI1  | -1.4553809 |
| SERPINI2  | -4.34941   |
| SERTM1    | -2.1039665 |
| SETDB2    | -2.8534997 |
| SEZ6      | -2.5684226 |
| SEZ6L2    | -1.3608389 |
| SFXN4     | -4.0413713 |
| SFXN5     | -2.312157  |
| SGCD      | -4.765771  |
| SGCZ      | -3.254753  |
| SGMS2     | -1.8352537 |
| SGTB      | -4.2587705 |
| SH2D1B2   | -5.918888  |
| SH2D4A    | -1.5190918 |
| SH2D5     | -2.66292   |
| SH2D6     | -1.9503772 |
| SH2D7     | -4.0014944 |
| SH3BP1    | -1.8130674 |
| SH3GL2    | -4.318762  |
| SHANK1    | -1.3034866 |
| SHANK2    | -2.4746475 |
| SHBG      | -6.0256605 |
| SHC3      | -2.8844452 |
| SHCBP1L   | -4.361205  |
| SHD       | -3.8663661 |
| SHISA2    | -2.7919183 |
| SHISA7    | -3.231147  |
| SHISA9    | -4.593496  |
| SHOX2     | -3.5745645 |
| SHROOM3   | -5.3147364 |
| SHROOM4   | -3.8844907 |
| SIAH3     | -2.4366643 |
| SIGLEC15  | -2.7344184 |
| SIM2      | -0.9266093 |
| SIS       | -5.274451  |
| SIT1      | -1.5704412 |
| SIX2      | -3.5587227 |
| SIX3      | -4.48446   |

|           |            |
|-----------|------------|
| SIX3OS1   | -4.0839844 |
| SIX6      | -3.1987348 |
| SKIDA1    | -5.4563684 |
| SKINT1    | -4.703971  |
| SKINT10   | -2.208657  |
| SKINT2    | -3.2296326 |
| SKINT3    | -3.299723  |
| SKINT4    | -4.921582  |
| SKINT5    | -3.739092  |
| SKINT6    | -3.9700284 |
| SKINT8    | -4.773421  |
| SLA2      | -0.6644495 |
| SLAIN1OS  | -3.3679576 |
| SLC10A4   | -5.511042  |
| SLC12A3   | -5.579573  |
| SLC13A1   | -2.1526139 |
| SLC13A2OS | -2.004199  |
| SLC16A1   | -2.0035367 |
| SLC16A4   | -1.86431   |
| SLC17A7   | -2.3457382 |
| SLC17A8   | -0.9788702 |
| SLC18A1   | -1.1138809 |
| SLC18A3   | -3.773665  |
| SLC1A7    | -3.201942  |
| SLC22A12  | -3.007864  |
| SLC22A19  | -1.7730777 |
| SLC22A2   | -3.6987667 |
| SLC22A22  | -3.970315  |
| SLC22A4   | -2.716271  |
| SLC24A1   | -2.5444593 |
| SLC24A2   | -2.7114468 |
| SLC25A18  | -2.6056988 |
| SLC25A31  | -3.5307271 |
| SLC25A43  | -3.8692453 |
| SLC25A53  | -2.1551108 |
| SLC25A54  | -2.5075595 |
| SLC26A3   | -3.3959472 |
| SLC26A5   | -5.0026484 |
| SLC26A7   | -2.6917481 |
| SLC26A8   | -2.885457  |
| SLC2A7    | -4.9973087 |
| SLC30A2   | -2.2991724 |
| SLC30A3   | -2.3506522 |
| SLC32A1   | -2.2957475 |
| SLC34A1   | -2.0280092 |

|           |            |
|-----------|------------|
| SLC34A3   | -2.2568033 |
| SLC35A5   | -2.5468364 |
| SLC35D3   | -2.3689435 |
| SLC35F1   | -2.3046503 |
| SLC35F4   | -1.4028866 |
| SLC35G2   | -1.982444  |
| SLC35G3   | -1.7607911 |
| SLC36A1OS | -3.642194  |
| SLC36A3   | -1.7260542 |
| SLC36A4   | -1.0690923 |
| SLC37A2   | -2.0624714 |
| SLC38A11  | -3.7693334 |
| SLC38A8   | -3.8376496 |
| SLC39A12  | -1.9816177 |
| SLC39A2   | -1.3625786 |
| SLC39A5   | -3.669244  |
| SLC44A5   | -1.8529036 |
| SLC45A2   | -4.55389   |
| SLC46A2   | -2.7442503 |
| SLC51A    | -6.098879  |
| SLC52A2   | -1.3981509 |
| SLC5A10   | -2.5987685 |
| SLC5A11   | -4.7362394 |
| SLC5A12   | -3.9861934 |
| SLC5A4A   | -4.8608284 |
| SLC5A4B   | -1.0907452 |
| SLC5A5    | -1.8562629 |
| SLC5A7    | -2.873319  |
| SLC5A8    | -4.1784606 |
| SLC6A1    | -4.2309837 |
| SLC6A16   | -3.0720026 |
| SLC6A17   | -5.233758  |
| SLC6A18   | -4.2878613 |
| SLC6A19OS | -4.0052476 |
| SLC6A20B  | -2.9768863 |
| SLC6A7    | -2.564607  |
| SLC7A12   | -1.1910849 |
| SLC7A13   | -3.9205759 |
| SLC7A14   | -3.3391368 |
| SLC7A15   | -4.1978445 |
| SLC8A1    | -1.5848043 |
| SLC9A2    | -2.1188471 |
| SLC9A5    | -3.5425532 |
| SLC9A9    | -3.0072877 |
| SLC9B1    | -5.9887934 |

|          |            |
|----------|------------|
| SLC9B2   | -3.618931  |
| SLC9C1   | -4.3169394 |
| SLCO1C1  | -2.7785978 |
| SLCO5A1  | -3.7474504 |
| SLCO6B1  | -1.4523411 |
| SLCO6C1  | -4.3180265 |
| SLFNL1   | -2.61598   |
| SLITRK2  | -1.0111439 |
| SLITRK3  | -6.2423935 |
| SLITRK4  | -5.9913626 |
| SLITRK5  | -4.9182105 |
| SLMO1    | -0.9985969 |
| SLX1B    | -0.9838579 |
| SLXL1    | -2.5496628 |
| SLY      | -3.3661573 |
| SMC2OS   | -2.0049708 |
| SMCO1    | -3.9420085 |
| SMCO2    | -1.9203777 |
| SMCO3    | -3.6236007 |
| SMCP     | -5.5788765 |
| SMEK3-PS | -3.4017508 |
| SMIM23   | -4.133399  |
| SMIM9    | -1.8770185 |
| SMOK2A   | -3.3377883 |
| SMOK2B   | -1.5898359 |
| SMOK3B   | -1.385071  |
| SMOK4A   | -4.95979   |
| SMPD5    | -1.0141788 |
| SMR2     | -3.0881505 |
| SMR3A    | -1.7382793 |
| SMURF1   | -1.3160167 |
| SMYD3    | -1.46996   |
| SMYD4    | -1.3848703 |
| SNAI3    | -4.1089625 |
| SNAP91   | -1.6984687 |
| SNCB     | -2.485081  |
| SNHG7OS  | -1.1686373 |
| SNHG8    | -3.4784825 |
| SNTB1    | -1.0363183 |
| SOGA3    | -5.24195   |
| SOHLH1   | -3.6166682 |
| SORCS1   | -4.404067  |
| SOSTDC1  | -2.07438   |
| SOX1     | -1.278203  |
| SOX11    | -2.7883086 |

|            |            |
|------------|------------|
| SOX12      | -3.9743774 |
| SOX14      | -3.530554  |
| SOX15      | -3.8909209 |
| SOX21      | -1.5385547 |
| SOX3       | -4.244216  |
| SOX30      | -8.187131  |
| SOX5IT     | -2.1080825 |
| SOX5OS1    | -2.7075276 |
| SOX6OS     | -2.7562573 |
| SOX8       | -2.2212162 |
| SP7        | -2.9806635 |
| SP9        | -5.5171876 |
| SPACA1     | -3.26965   |
| SPACA5     | -1.3724265 |
| SPACA7     | -4.0318985 |
| SPAG11A    | -3.372145  |
| SPAG11B    | -3.0983498 |
| SPAG17OS   | -4.2405486 |
| SPAG8      | -4.1565127 |
| SPAM1      | -4.0030556 |
| SPATA16    | -1.7214341 |
| SPATA19    | -1.7873802 |
| SPATA20    | -4.668265  |
| SPATA21    | -2.9582105 |
| SPATA24    | -2.1136763 |
| SPATA25    | -2.6089988 |
| SPATA2L    | -2.197797  |
| SPATA3     | -1.7652063 |
| SPATA31    | -2.6891363 |
| SPATA31D1B | -3.4097486 |
| SPATA31D1D | -5.431061  |
| SPATA33    | -5.170229  |
| SPATA4     | -6.1672816 |
| SPATA45    | -3.805756  |
| SPATA9     | -2.5007849 |
| SPATC1     | -3.3376467 |
| SPDL1      | -1.7127926 |
| SPDYA      | -3.2993891 |
| SPDYB      | -4.451607  |
| SPEER1-PS1 | -4.442157  |
| SPEER2     | -5.6679525 |
| SPEER3     | -2.4638293 |
| SPEER4A    | -4.390025  |
| SPEER4D    | -3.9666467 |
| SPEER4F    | -2.1697576 |

|            |            |
|------------|------------|
| SPEER5-PS1 | -2.5620081 |
| SPEER8-PS1 | -5.3218327 |
| SPEER9-PS1 | -7.887099  |
| SPEM1      | -1.153662  |
| SPERT      | -3.2781272 |
| SPESP1     | -1.568841  |
| SPIN2D     | -2.807621  |
| SPINK11    | -2.8468227 |
| SPINK13    | -3.6968496 |
| SPINK6     | -2.2800364 |
| SPINK7     | -3.606971  |
| SPINK8     | -3.421526  |
| SPINKL     | -2.6995432 |
| SPINT3     | -2.3068082 |
| SPINT4     | -3.0522406 |
| SPINT5     | -4.442478  |
| SPO11      | -3.7349021 |
| SPOCD1     | -2.1180375 |
| SPON2      | -2.4808931 |
| SPPL2C     | -3.1110396 |
| SPRN       | -1.8368213 |
| SPRR1B     | -4.9284067 |
| SPRR2B     | -1.2808793 |
| SPRR2F     | -2.5676756 |
| SPRR2H     | -7.3196497 |
| SPRR2I     | -3.7336812 |
| SPRR2J-PS  | -3.2006567 |
| SPRR4      | -5.705799  |
| SPRTN      | -2.029925  |
| SPRY2      | -2.7773132 |
| SPRY4      | -1.6537411 |
| SPSB4      | -2.9840045 |
| SPTBN5     | -3.796852  |
| SPTSSB     | -1.1591053 |
| SPZ1       | -2.2932863 |
| SRC        | -3.5992906 |
| SRCRB4D    | -2.6026843 |
| SRRM3      | -3.2737093 |
| SRRM3OS    | -5.174608  |
| SRRM4OS    | -4.397331  |
| SRSF12     | -4.4309487 |
| SRY        | -3.989     |
| SSMEM1     | -3.025287  |
| SST        | -2.6187785 |
| SSTR1      | -4.8473487 |

|            |            |
|------------|------------|
| SSTR2      | -2.0064206 |
| SSTR5      | -1.6404309 |
| SSTY1      | -3.8526506 |
| SSU2       | -3.043851  |
| SSX9       | -4.308833  |
| SSXA1      | -3.8590362 |
| SSXB1      | -5.615633  |
| SSXB10     | -5.193306  |
| SSXB7      | -4.2519627 |
| SSXB8      | -3.9055912 |
| ST18       | -4.917457  |
| ST6GAL2    | -3.2471669 |
| ST6GALNAC3 | -2.471839  |
| ST8SIA3    | -2.3528707 |
| ST8SIA5    | -2.8774464 |
| STC2       | -3.8036747 |
| STEAP3     | -1.8829615 |
| STIL       | -1.42367   |
| STIM2      | -2.1063044 |
| STK32B     | -13.82603  |
| STK32C     | -4.190162  |
| STK36      | -2.1690207 |
| STMN4      | -4.068952  |
| STOML3     | -4.867666  |
| STON2      | -1.4463212 |
| STOX2      | -1.1651716 |
| STPG2      | -1.7402892 |
| STRA8      | -3.4719768 |
| STRC       | -5.148964  |
| STRM       | -5.4692626 |
| STXBP5L    | -3.6439278 |
| STYK1      | -2.347897  |
| SUFU       | -1.2276962 |
| SULT2A7    | -3.5730867 |
| SUN5       | -2.0981812 |
| SUPT20     | -1.016381  |
| SUPT3      | -0.9711878 |
| SUSD1      | -3.1064801 |
| SUSD3      | -3.050082  |
| SUV39H1    | -1.5811303 |
| SV2A       | -1.6373672 |
| SV2B       | -3.0488026 |
| SV2C       | -0.9281292 |
| SVAL1      | -4.348947  |
| SVAL2      | -2.8791428 |

|           |            |
|-----------|------------|
| SVAL3     | -1.5340204 |
| SVOP      | -3.427142  |
| SVOPL     | -0.9411304 |
| SVS1      | -1.7494049 |
| SVS2      | -3.8901172 |
| SVS3B     | -3.4324236 |
| SVS4      | -3.75925   |
| SVS5      | -4.831647  |
| SYCE1L    | -3.9195526 |
| SYCE3     | -4.10499   |
| SYCN      | -5.555417  |
| SYCP1-PS1 | -2.1450946 |
| SYCP2L    | -2.124297  |
| SYN1      | -3.109037  |
| SYN3      | -1.3126926 |
| SYNA      | -5.15222   |
| SYNB      | -1.758704  |
| SYNDIG1   | -2.36566   |
| SYNDIG1L  | -4.956065  |
| SYNGAP1   | -3.361579  |
| SYNGR3    | -3.32824   |
| SYNGR4    | -2.2323217 |
| SYNPR     | -10.606516 |
| SYPL2     | -2.6386697 |
| SYT10     | -4.890686  |
| SYT14     | -5.3602915 |
| SYT16     | -4.4154134 |
| SYT17     | -3.904647  |
| SYT2      | -3.0474567 |
| SYT3      | -2.0629723 |
| SYT7      | -4.276276  |
| SYT8      | -5.527748  |
| SYTL1     | -2.3171124 |
| SYTL4     | -2.07582   |
| SYTL5     | -4.2066407 |
| TAAR1     | -3.0497465 |
| TAAR5     | -3.2423759 |
| TAAR6     | -1.4619842 |
| TAAR7A    | -4.301094  |
| TAAR7B    | -2.6260374 |
| TAAR7D    | -3.1277242 |
| TAAR7F    | -5.744463  |
| TAAR8A    | -5.555339  |
| TAAR9     | -2.1131394 |
| TAC2      | -2.1433954 |



|            |            |
|------------|------------|
| TAC4       | -2.5237203 |
| TACO1OS    | -4.5420456 |
| TACR1      | -0.6585505 |
| TACR3      | -3.780856  |
| TAGLN3     | -3.0595555 |
| TAMM41     | -1.6278818 |
| TANC2      | -2.0374973 |
| TAS1R1     | -3.6277823 |
| TAS1R2     | -4.6381903 |
| TAS2R103   | -3.792573  |
| TAS2R104   | -5.0881014 |
| TAS2R105   | -1.7791181 |
| TAS2R106   | -4.218651  |
| TAS2R107   | -1.5186851 |
| TAS2R110   | -4.693568  |
| TAS2R114   | -2.7965727 |
| TAS2R115   | -2.5478122 |
| TAS2R118   | -3.6328237 |
| TAS2R119   | -3.2297363 |
| TAS2R120   | -3.3234088 |
| TAS2R121   | -3.6972692 |
| TAS2R122   | -1.459245  |
| TAS2R124   | -6.524609  |
| TAS2R125   | -3.9434667 |
| TAS2R126   | -1.6506801 |
| TAS2R130   | -2.6702938 |
| TAS2R134   | -6.544508  |
| TAS2R135   | -2.444213  |
| TAS2R138   | -4.24039   |
| TAS2R139   | -4.0914326 |
| TAS2R140   | -4.9638553 |
| TAS2R143   | -2.9082737 |
| TBATA      | -2.0977602 |
| TBC1D22BOS | -2.4621458 |
| TBC1D31    | -1.4486792 |
| TBCE       | -2.2489998 |
| TBL3       | -2.1534305 |
| TBPL2      | -2.429541  |
| TBR1       | -5.1731634 |
| TBX10      | -2.484687  |
| TBX15      | -4.1974974 |
| TBX20      | -3.9713798 |
| TBX3OS1    | -5.1774426 |
| TCAM1      | -3.0793362 |
| TCEA2      | -2.5054324 |

|          |            |
|----------|------------|
| TCEANC   | -3.2838507 |
| TCERG1L  | -2.6618774 |
| TCFL5    | -5.1389637 |
| TCHHL1   | -2.7614155 |
| TCL1     | -4.1890955 |
| TCL1B1   | -1.5191531 |
| TCL1B3   | -4.702839  |
| TCL1B4   | -2.7287998 |
| TCL1B5   | -5.6097693 |
| TCP10C   | -2.906824  |
| TCRA     | -3.0324306 |
| TCRB-J   | -2.2855804 |
| TCSTV1   | -1.9384701 |
| TCTE1    | -1.8718014 |
| TCTE2    | -6.394599  |
| TCTEX1D1 | -1.9659944 |
| TDH      | -3.3639479 |
| TDPOZ3   | -2.6679337 |
| TDPOZ4   | -2.374281  |
| TDRD1    | -4.9777064 |
| TDRD6    | -2.7649646 |
| TDRD9    | -2.896362  |
| TECTA    | -1.9458008 |
| TEKT3    | -3.6971133 |
| TEKT5    | -3.368927  |
| TENM2    | -5.9046416 |
| TENM3    | -2.7991965 |
| TEPP     | -1.255599  |
| TET1     | -1.5979631 |
| TET3     | -2.050164  |
| TEX101   | -6.907621  |
| TEX13    | -5.4187403 |
| TEX13A   | -4.6141834 |
| TEX16    | -1.5682628 |
| TEX19.1  | -3.3752258 |
| TEX19.2  | -3.5638638 |
| TEX21    | -4.900079  |
| TEX24    | -3.5027003 |
| TEX29    | -2.8497944 |
| TEX33    | -4.747443  |
| TEX35    | -2.8411229 |
| TEX36    | -5.116211  |
| TEX37    | -5.6394405 |
| TEX38    | -5.0595217 |
| TEX40    | -2.261105  |

|          |            |
|----------|------------|
| TEX43    | -4.3836803 |
| TFAP2A   | -2.6681814 |
| TFAP2D   | -2.7286723 |
| TFAP2E   | -1.1617308 |
| TFAP4    | -1.3728724 |
| TG       | -4.1022134 |
| TGIF2    | -2.7402077 |
| TGIF2LX1 | -2.605959  |
| TGIF2LX2 | -4.977434  |
| TGM4     | -3.3230991 |
| TGM5     | -2.5916085 |
| TGM7     | -6.3183303 |
| TH       | -0.9850004 |
| THADA    | -1.6480513 |
| THEG     | -4.504755  |
| THEM5    | -2.2398472 |
| THEM6    | -1.3192513 |
| THEMIS   | -3.0552227 |
| THEMIS3  | -3.9861858 |
| THNSL1   | -2.865372  |
| THSD7A   | -0.9874933 |
| TIA1     | -8.604101  |
| TKTL1    | -3.2992053 |
| TKTL2    | -4.8288608 |
| TLL2     | -3.0157447 |
| TLR11    | -3.2062953 |
| TLR8     | -2.624621  |
| TLX1     | -3.201826  |
| TLX3     | -4.0923853 |
| TMBIM7   | -2.6213799 |
| TMC1     | -4.3474674 |
| TMC2     | -4.3455467 |
| TMCO2    | -2.4564197 |
| TMCO5B   | -4.119493  |
| TMED11   | -4.332806  |
| TMEM106A | -0.8072553 |
| TMEM108  | -1.9514151 |
| TMEM130  | -3.692221  |
| TMEM132B | -3.6340666 |
| TMEM143  | -0.8982611 |
| TMEM144  | -0.7729971 |
| TMEM150B | -2.2989395 |
| TMEM150C | -4.6615186 |
| TMEM151A | -1.092099  |
| TMEM156  | -1.9916048 |

|           |            |
|-----------|------------|
| TMEM163   | -4.296758  |
| TMEM168   | -1.2075934 |
| TMEM169   | -5.5865335 |
| TMEM179   | -4.2037473 |
| TMEM182   | -5.913478  |
| TMEM191C  | -2.9852004 |
| TMEM196   | -3.6927316 |
| TMEM198   | -1.3578236 |
| TMEM209   | -1.3126674 |
| TMEM210   | -3.3004537 |
| TMEM217   | -3.8258157 |
| TMEM218   | -2.5199172 |
| TMEM221   | -4.9748025 |
| TMEM225   | -3.2724364 |
| TMEM233   | -4.137523  |
| TMEM240   | -2.0685482 |
| TMEM247   | -2.2423477 |
| TMEM253   | -3.4483173 |
| TMEM26    | -1.3671775 |
| TMEM28    | -0.9513736 |
| TMEM30C   | -1.1033056 |
| TMEM51OS1 | -2.1759858 |
| TMEM52    | -2.5939777 |
| TMEM63C   | -3.6615112 |
| TMEM72    | -4.2505608 |
| TMEM74    | -4.8388247 |
| TMEM74B   | -1.9064317 |
| TMEM74BOS | -0.999383  |
| TMEM95    | -3.2762072 |
| TMIGD1    | -1.7022212 |
| TMPRSS11C | -2.4592195 |
| TMPRSS11D | -2.8142486 |
| TMPRSS11E | -2.0869408 |
| TMPRSS11G | -3.7689888 |
| TMPRSS12  | -4.4211807 |
| TMPRSS5   | -1.1534402 |
| TMPRSS9   | -3.4342728 |
| TNC       | -4.1507797 |
| TNFRSF14  | -0.7419527 |
| TNFRSF8   | -4.167822  |
| TNFSF18   | -3.7517452 |
| TNK2OS    | -6.9377394 |
| TNMD      | -1.1763206 |
| TNNC2     | -3.1491444 |
| TNNI1     | -5.5238056 |

|             |            |
|-------------|------------|
| TNNI3K      | -3.4146607 |
| TNR         | -4.486164  |
| TNS4        | -1.1614542 |
| TOPAZ1      | -2.7857628 |
| TOPORSL     | -1.6327491 |
| TPBPB       | -3.4015777 |
| TPCN2       | -2.4450188 |
| TPGS2       | -1.9949524 |
| TPH1        | -2.700597  |
| TPH2        | -3.8834307 |
| TPPP2       | -3.480716  |
| TPSG1       | -4.645091  |
| TPST1       | -1.4059386 |
| TPTE        | -4.3757615 |
| TRAF3IP1    | -1.5421195 |
| TRAIP       | -3.7194953 |
| TRANK1      | -1.0761871 |
| TRAV14N-1   | -4.817217  |
| TRAV3-4     | -2.3799202 |
| TRAV7N-5    | -2.159534  |
| TRAV9D-3    | -1.003901  |
| TRAV9N-2    | -3.677767  |
| TREX2       | -3.1929352 |
| TRGV2       | -5.0786343 |
| TRH         | -1.6196017 |
| TRIM15      | -5.1929283 |
| TRIM17      | -2.3224058 |
| TRIM30E-PS1 | -0.7359676 |
| TRIM31      | -3.4738002 |
| TRIM36      | -1.2844193 |
| TRIM42      | -5.76684   |
| TRIM45      | -2.6572745 |
| TRIM50      | -4.0492163 |
| TRIM55      | -5.903928  |
| TRIM58      | -3.5645711 |
| TRIM61      | -6.2549453 |
| TRIM66      | -3.8188848 |
| TRIM67      | -3.1491926 |
| TRIM7       | -2.5030246 |
| TRIM71      | -4.5994053 |
| TRIM9       | -1.2948883 |
| TRIML1      | -4.5373425 |
| TRIML2      | -4.400958  |
| TROAP       | -2.8023453 |
| TRP53TG5    | -5.500961  |

|          |            |
|----------|------------|
| TRPA1    | -3.3461263 |
| TRPC3    | -2.4467843 |
| TRPC4    | -3.2966914 |
| TRPC5    | -4.2942624 |
| TRPC5OS  | -2.556087  |
| TRPD52L3 | -1.3257539 |
| TRPM3    | -1.9467561 |
| TRPM5    | -2.530611  |
| TRPV3    | -3.8881073 |
| TRY5     | -4.820259  |
| TSC2     | -4.015598  |
| TSGA10IP | -0.8090446 |
| TSGA13   | -1.9505181 |
| TSGA8    | -1.3282061 |
| TSHR     | -3.624674  |
| TSKS     | -2.841648  |
| TSPAN10  | -3.1011875 |
| TSPAN32  | -4.612625  |
| TSSK1    | -4.552013  |
| TSSK2    | -1.5908527 |
| TSSK3    | -4.062133  |
| TSSK5    | -2.620297  |
| TSSK6    | -2.582741  |
| TSX      | -3.6587164 |
| TTBK1    | -2.4172835 |
| TTC22    | -2.8863013 |
| TTC23L   | -2.5178475 |
| TTC39D   | -5.32092   |
| TTC8     | -0.8870473 |
| TTC9B    | -3.255077  |
| TTLL13   | -4.75481   |
| TTLL2    | -1.377428  |
| TTLL8    | -2.0818107 |
| TUBA3A   | -3.4356117 |
| TUBA3B   | -4.4561963 |
| TUBAL3   | -1.0392985 |
| TUBB3    | -1.9569359 |
| TULP2    | -2.5016594 |
| TXLNG    | -0.6701098 |
| TYMS     | -0.961479  |
| TYR      | -2.63931   |
| TYW3     | -1.7467182 |
| U90926   | -2.7863386 |
| UBAP1L   | -3.1202276 |
| UBE2DNL1 | -4.7838535 |

|          |            |
|----------|------------|
| UBL4B    | -5.0111055 |
| UBQLN3   | -2.8831508 |
| UBQLNL   | -3.8367538 |
| UCN      | -2.676652  |
| UCN2     | -2.9353452 |
| UCN3     | -2.7563195 |
| UCP1     | -2.9498534 |
| UFSP1    | -1.9642184 |
| UGT8A    | -2.1822958 |
| ULK4     | -2.9303668 |
| UNC13A   | -3.4720116 |
| UNC45BOS | -3.1198575 |
| UNC5A    | -3.3003895 |
| UNC5D    | -13.725019 |
| UNC79    | -2.6227424 |
| UNC80    | -2.8666427 |
| UNCX     | -2.0569894 |
| UPK3BL   | -2.9022987 |
| UPRT     | -0.71947   |
| USH1C    | -4.1170683 |
| USH1G    | -2.5141232 |
| USH2A    | -2.7733636 |
| USMG2    | -0.9737954 |
| USP17LE  | -3.8741841 |
| USP26    | -2.061039  |
| USP27X   | -2.8886583 |
| USP29    | -2.0030696 |
| USP35    | -2.817735  |
| USP37    | -2.3054094 |
| USP44    | -4.9939227 |
| USP49    | -2.1152043 |
| USP51    | -2.9586258 |
| USP8     | -0.6278999 |
| USP9Y    | -4.3144865 |
| UTP14B   | -3.7026083 |
| UTP18    | -1.6264732 |
| UTS2     | -3.6228168 |
| UTS2B    | -3.210935  |
| UTY      | -3.5074902 |
| UVSSA    | -4.3789864 |
| V1RA8    | -3.5192547 |
| V1RD19   | -2.330278  |
| VANGL2   | -1.0132167 |
| VASH2    | -4.3956623 |
| VAX1     | -4.5979853 |

|          |            |
|----------|------------|
| VAX2OS   | -2.3120189 |
| VEZT     | -2.0271237 |
| VGLL1    | -3.8687599 |
| VGLL2    | -6.2332544 |
| VGLL3    | -3.1977286 |
| VIL1     | -2.3582473 |
| VIP      | -5.7236814 |
| VMN1R1   | -4.4257526 |
| VMN1R101 | -3.6290407 |
| VMN1R12  | -3.3430753 |
| VMN1R121 | -1.3367324 |
| VMN1R122 | -3.4164352 |
| VMN1R131 | -3.239217  |
| VMN1R132 | -4.771061  |
| VMN1R139 | -2.7074738 |
| VMN1R148 | -4.716922  |
| VMN1R157 | -5.083062  |
| VMN1R16  | -3.448979  |
| VMN1R167 | -1.5132892 |
| VMN1R168 | -2.2045941 |
| VMN1R17  | -3.7138746 |
| VMN1R171 | -3.3590496 |
| VMN1R172 | -4.9310184 |
| VMN1R174 | -2.216755  |
| VMN1R175 | -2.7693677 |
| VMN1R176 | -1.8600326 |
| VMN1R18  | -2.4480293 |
| VMN1R181 | -3.0956473 |
| VMN1R183 | -1.8177819 |
| VMN1R185 | -4.33099   |
| VMN1R188 | -1.6376977 |
| VMN1R189 | -3.15523   |
| VMN1R19  | -2.6303859 |
| VMN1R191 | -2.717335  |
| VMN1R194 | -3.1988754 |
| VMN1R196 | -2.2583592 |
| VMN1R198 | -1.6582766 |
| VMN1R199 | -4.9107494 |
| VMN1R2   | -4.1478148 |
| VMN1R20  | -5.3083067 |
| VMN1R200 | -1.4010425 |
| VMN1R201 | -3.0279343 |
| VMN1R202 | -4.289192  |
| VMN1R203 | -2.0590205 |
| VMN1R205 | -2.4216614 |



|            |            |
|------------|------------|
| VMN1R206   | -3.0068643 |
| VMN1R207-F | -3.528905  |
| VMN1R209   | -2.71053   |
| VMN1R210   | -4.131401  |
| VMN1R211   | -1.9326627 |
| VMN1R212   | -3.2162771 |
| VMN1R214   | -2.897503  |
| VMN1R216   | -2.5242686 |
| VMN1R218   | -1.6605515 |
| VMN1R22    | -3.234173  |
| VMN1R223   | -4.288166  |
| VMN1R224   | -4.000209  |
| VMN1R225   | -4.0263343 |
| VMN1R226   | -3.2207804 |
| VMN1R227   | -4.867984  |
| VMN1R228   | -2.414662  |
| VMN1R230   | -5.5199976 |
| VMN1R231   | -2.5951269 |
| VMN1R234   | -1.0052092 |
| VMN1R235   | -4.5041933 |
| VMN1R236   | -3.2909086 |
| VMN1R24    | -4.6463    |
| VMN1R26    | -2.252701  |
| VMN1R27    | -2.8942313 |
| VMN1R28    | -4.590542  |
| VMN1R30    | -1.8207545 |
| VMN1R31    | -3.3324723 |
| VMN1R32    | -3.7813933 |
| VMN1R33    | -4.6502924 |
| VMN1R34    | -6.8281927 |
| VMN1R35    | -1.671833  |
| VMN1R39    | -4.338155  |
| VMN1R4     | -2.1329153 |
| VMN1R40    | -2.030872  |
| VMN1R41    | -3.9528093 |
| VMN1R42    | -5.8230906 |
| VMN1R45    | -3.0329807 |
| VMN1R47    | -6.8755903 |
| VMN1R51    | -2.246312  |
| VMN1R54    | -3.9390361 |
| VMN1R55    | -3.0270677 |
| VMN1R57    | -2.7739732 |
| VMN1R58    | -3.000473  |
| VMN1R59    | -0.8582883 |
| VMN1R6     | -4.4321275 |

|            |            |
|------------|------------|
| VMN1R62    | -2.0523913 |
| VMN1R63    | -3.7641852 |
| VMN1R64    | -3.8000956 |
| VMN1R66    | -6.746436  |
| VMN1R67    | -5.8446145 |
| VMN1R68    | -1.3505466 |
| VMN1R69    | -2.7378783 |
| VMN1R72    | -3.278473  |
| VMN1R73    | -3.2846074 |
| VMN1R74    | -4.277013  |
| VMN1R75    | -6.01675   |
| VMN1R76    | -2.6860068 |
| VMN1R8     | -1.8983688 |
| VMN1R80    | -2.763537  |
| VMN1R81    | -3.6447082 |
| VMN1R82    | -2.5710723 |
| VMN1R84    | -5.755088  |
| VMN1R85    | -2.3553448 |
| VMN1R86    | -5.60122   |
| VMN1R89    | -2.8266892 |
| VMN1R-PS79 | -1.6453905 |
| VMN2R10    | -1.8434372 |
| VMN2R100   | -1.8619783 |
| VMN2R101   | -3.3168187 |
| VMN2R102   | -3.583321  |
| VMN2R103   | -3.9827516 |
| VMN2R104   | -4.494755  |
| VMN2R106   | -2.8755798 |
| VMN2R107   | -4.147086  |
| VMN2R108   | -2.3808331 |
| VMN2R109   | -2.8858757 |
| VMN2R11    | -1.4318252 |
| VMN2R111   | -3.8389733 |
| VMN2R112   | -3.0773816 |
| VMN2R114   | -4.0790615 |
| VMN2R115   | -3.5754466 |
| VMN2R116   | -2.4842184 |
| VMN2R118   | -6.758322  |
| VMN2R12    | -2.7390227 |
| VMN2R120   | -3.5418057 |
| VMN2R121   | -3.0477772 |
| VMN2R123   | -2.256913  |
| VMN2R13    | -2.1802409 |
| VMN2R17    | -2.836586  |
| VMN2R20    | -1.1661172 |

|            |            |
|------------|------------|
| VMN2R27    | -3.112913  |
| VMN2R29    | -1.2067659 |
| VMN2R3     | -2.8963654 |
| VMN2R35    | -3.2810595 |
| VMN2R37    | -2.548988  |
| VMN2R39    | -4.5794716 |
| VMN2R42    | -2.24144   |
| VMN2R43    | -1.7883964 |
| VMN2R48    | -4.467497  |
| VMN2R5     | -3.3208215 |
| VMN2R53    | -3.1051388 |
| VMN2R54    | -5.229656  |
| VMN2R55    | -2.917046  |
| VMN2R57    | -2.891217  |
| VMN2R58    | -4.394376  |
| VMN2R60    | -6.0621414 |
| VMN2R62    | -5.0139213 |
| VMN2R65    | -2.2615836 |
| VMN2R67    | -4.5748725 |
| VMN2R68    | -1.6600914 |
| VMN2R7     | -3.5693426 |
| VMN2R71    | -4.3546343 |
| VMN2R72    | -4.615489  |
| VMN2R73    | -4.4241266 |
| VMN2R77    | -6.6213408 |
| VMN2R80    | -5.972185  |
| VMN2R81    | -3.0639985 |
| VMN2R82    | -4.3073606 |
| VMN2R83    | -4.2942805 |
| VMN2R85    | -3.8316169 |
| VMN2R86    | -2.9309425 |
| VMN2R89    | -2.5459619 |
| VMN2R90    | -3.041712  |
| VMN2R91    | -4.522463  |
| VMN2R96    | -2.263112  |
| VMN2R97    | -1.0099461 |
| VMN2R98    | -3.793233  |
| VMN2R99    | -1.079102  |
| VMN2R-PS1C | -3.3508534 |
| VMN2R-PS12 | -5.7780848 |
| VMN2R-PS54 | -4.0187902 |
| VMN2R-PS57 | -3.9950244 |
| VPREB1     | -2.8396635 |
| VPREB2     | -6.349286  |
| VPS72      | -2.2760448 |

|         |            |
|---------|------------|
| VSIG1   | -1.1930668 |
| VSIG10L | -2.6786895 |
| VSTM2A  | -2.3129742 |
| VSTM2B  | -2.4867263 |
| VSTM2L  | -6.46608   |
| VSTM5   | -3.8842742 |
| VSX2    | -4.1824675 |
| VTCN1   | -3.2136483 |
| VWA2    | -4.3283973 |
| VWA5B1  | -4.513956  |
| VWA5B2  | -1.8585808 |
| VWC2    | -2.6131415 |
| VWC2L   | -4.0718403 |
| VWDE    | -3.654659  |
| WAP     | -3.4128385 |
| WBP2NL  | -2.9608934 |
| WBSCR17 | -2.7780035 |
| WBSCR25 | -3.5655975 |
| WBSCR28 | -2.4137979 |
| WDHD1   | -1.2884514 |
| WDR17   | -4.7665462 |
| WDR20RT | -1.6397767 |
| WDR27   | -4.4325795 |
| WDR49   | -3.698693  |
| WDR62   | -2.7193315 |
| WDR64   | -3.9160402 |
| WDR70   | -2.4971538 |
| WDR86   | -2.2183156 |
| WDR88   | -1.383193  |
| WDR93   | -2.6724124 |
| WEE2    | -2.3392339 |
| WFDC11  | -5.116538  |
| WFDC12  | -4.5187464 |
| WFDC15A | -7.3227525 |
| WFDC15B | -3.2312849 |
| WFDC16  | -4.0619316 |
| WFDC8   | -3.3637204 |
| WFIKKN2 | -2.8721912 |
| WIBG    | -2.9137878 |
| WISP3   | -6.657363  |
| WNK3    | -3.0173237 |
| WNT1    | -0.9872904 |
| WNT2    | -3.2111895 |
| WNT2B   | -3.6170712 |
| WNT3    | -1.2996297 |

|          |            |
|----------|------------|
| WNT8A    | -2.7036633 |
| WNT8B    | -4.1932483 |
| WNT9B    | -3.015638  |
| WSCD1    | -4.350999  |
| WT10S    | -2.7856107 |
| XCR1     | -2.1996856 |
| XK       | -3.0831857 |
| XKR4     | -3.736302  |
| XKR5     | -2.4291284 |
| XKR7     | -3.6139593 |
| XLR5A    | -3.3249748 |
| XLR5B    | -3.2194173 |
| XLR5C    | -2.9078395 |
| XRCC6BP1 | -5.0666876 |
| XYLT1    | -3.4600322 |
| YIPF7    | -2.6303785 |
| YLPM1    | -2.3401694 |
| YPEL1    | -2.05091   |
| YPEL4    | -3.7378528 |
| ZAN      | -3.4100416 |
| ZAR1     | -5.2515154 |
| ZBTB7C   | -4.7300544 |
| ZC2HC1B  | -5.344583  |
| ZC3H8    | -2.3392906 |
| ZC3HAV1L | -3.0938945 |
| ZC4H2    | -3.0790505 |
| ZCCHC13  | -4.4118214 |
| ZCCHC16  | -4.975584  |
| ZCCHC18  | -3.149213  |
| ZCCHC4   | -0.8723304 |
| ZCCHC5   | -4.2934465 |
| ZCWPW2   | -3.0476713 |
| ZDBF2    | -1.7125268 |
| ZDHHC11  | -2.9777713 |
| ZDHHC15  | -4.35522   |
| ZDHHC25  | -6.267687  |
| ZFHX2OS  | -3.1789534 |
| ZFP109   | -1.4390852 |
| ZFP11    | -3.355174  |
| ZFP114   | -2.6923237 |
| ZFP119A  | -2.0193257 |
| ZFP12    | -2.4769506 |
| ZFP13    | -1.6208403 |
| ZFP142   | -1.441685  |
| ZFP160   | -3.489705  |

|          |            |
|----------|------------|
| ZFP300   | -5.3247747 |
| ZFP334   | -2.9748504 |
| ZFP335OS | -0.9281817 |
| ZFP345   | -3.8089976 |
| ZFP37    | -3.5265281 |
| ZFP385A  | -0.772428  |
| ZFP385B  | -1.0974767 |
| ZFP385C  | -4.4143105 |
| ZFP398   | -1.1846752 |
| ZFP42    | -4.476367  |
| ZFP420   | -1.1075532 |
| ZFP428   | -2.0502794 |
| ZFP438   | -2.5723963 |
| ZFP444   | -3.5506296 |
| ZFP454   | -2.1495552 |
| ZFP526   | -2.4937625 |
| ZFP563   | -1.5031829 |
| ZFP57    | -1.245441  |
| ZFP575   | -2.3729348 |
| ZFP605   | -0.673945  |
| ZFP609   | -1.9507821 |
| ZFP616   | -4.1340556 |
| ZFP619   | -1.3065343 |
| ZFP65    | -0.652786  |
| ZFP667   | -1.8080015 |
| ZFP69    | -0.6564431 |
| ZFP72    | -1.3207982 |
| ZFP735   | -4.6772695 |
| ZFP759   | -2.1869323 |
| ZFP775   | -1.926678  |
| ZFP781   | -1.0378807 |
| ZFP786   | -6.114771  |
| ZFP808   | -6.2384768 |
| ZFP820   | -1.455569  |
| ZFP827   | -4.004676  |
| ZFP85    | -2.2598534 |
| ZFP853   | -1.4115298 |
| ZFP85OS  | -2.2617416 |
| ZFP870   | -2.1027403 |
| ZFP874A  | -3.8286786 |
| ZFP879   | -3.463534  |
| ZFP882   | -0.7438657 |
| ZFP92    | -1.4707344 |
| ZFP933   | -1.5589795 |
| ZFP934   | -2.500676  |

|         |            |
|---------|------------|
| ZFP939  | -4.4987464 |
| ZFP94   | -2.8277829 |
| ZFP951  | -2.7226257 |
| ZFP957  | -1.3011847 |
| ZFY1    | -2.526978  |
| ZFY2    | -4.293514  |
| ZFYVE28 | -4.7072086 |
| ZG16    | -3.8475864 |
| ZGRF1   | -3.4747798 |
| ZIC2    | -3.3998284 |
| ZIC3    | -3.7847877 |
| ZIC4    | -4.6860247 |
| ZIC5    | -4.294779  |
| ZIM1    | -2.684826  |
| ZIM2    | -1.5296988 |
| ZKSCAN2 | -4.134117  |
| ZKSCAN4 | -3.6323454 |
| ZMAT4   | -4.0787277 |
| ZNRF4   | -5.7916822 |
| ZP1     | -3.02876   |
| ZP2     | -1.8786795 |
| ZP3     | -3.4453373 |
| ZP3R    | -4.578809  |
| ZPBP2   | -2.2706604 |
| ZPLD1   | -3.3745394 |
| ZRSR2   | -1.3576281 |
| ZSCAN10 | -3.8858056 |
| ZSCAN2  | -2.2150884 |
| ZSCAN30 | -4.1065226 |
| ZSCAN4A | -1.774503  |
| ZSCAN4B | -2.3594007 |
| ZSCAN4C | -3.6613264 |
| ZSCAN5B | -3.52103   |
| AAAS    | 1.250258   |
| AAGAB   | 1.6448913  |
| AAK1    | 1.2437992  |
| AAR2    | 1.5388265  |
| AARSD1  | 1.1765623  |
| AATF    | 1.549612   |
| ABCB10  | 1.3317461  |
| ABCC1   | 2.1353612  |
| ABCC10  | 1.3727727  |
| ABCC3   | 3.5285363  |
| ABCC4   | 1.1780343  |
| ABCE1   | 2.3047943  |

|         |            |
|---------|------------|
| ABCF1   | 1.8012266  |
| ABCG8   | 0.93211484 |
| ABHD11  | 1.8414669  |
| ABHD13  | 1.4248827  |
| ABHD17B | 1.455709   |
| ABHD17C | 1.620534   |
| ABHD2   | 2.071782   |
| ABHD4   | 1.2959819  |
| ABHD5   | 1.5236912  |
| ABI1    | 1.6564136  |
| ABL1    | 0.7843733  |
| ABL2    | 0.911222   |
| ABRA    | 0.77219987 |
| ABRACL  | 1.6980815  |
| ABTB1   | 0.9144678  |
| ABTB2   | 2.8142228  |
| ACACA   | 1.7134662  |
| ACADSB  | 1.8232665  |
| ACBD3   | 2.1448379  |
| ACBD4   | 1.45333    |
| ACD     | 1.5640059  |
| ACER3   | 1.593914   |
| ACIN1   | 1.3971095  |
| ACKR1   | 6.453738   |
| ACLY    | 0.85406256 |
| ACO2    | 1.7384181  |
| ACOT2   | 1.0917201  |
| ACOT8   | 1.5348878  |
| ACP2    | 1.6844859  |
| ACRBP   | 1.8172398  |
| ACSF2   | 1.8155699  |
| ACTB    | 1.4572458  |
| ACTG1   | 1.5025163  |
| ACTR10  | 2.4778533  |
| ACTR1A  | 1.2381463  |
| ACTR3   | 1.5436492  |
| ACTR5   | 0.62762165 |
| ACTR6   | 1.0296516  |
| ACTR8   | 1.2461076  |
| ACVR1   | 1.5195208  |
| ACVR1B  | 2.590454   |
| ADAM17  | 1.277314   |
| ADAM9   | 2.1899753  |
| ADAMTS1 | 1.0805907  |
| ADAMTS4 | 2.8655062  |



|         |            |
|---------|------------|
| ADAP2   | 1.0187407  |
| ADAR    | 1.7804394  |
| ADAT2   | 1.7645335  |
| ADCK2   | 1.0832419  |
| ADCY1   | 3.607187   |
| ADI1    | 1.548646   |
| ADIPOR1 | 1.3667316  |
| ADIPOR2 | 1.9447155  |
| ADM     | 2.9323153  |
| ADNP    | 0.84023    |
| ADO     | 0.9877608  |
| ADORA2A | 2.4491367  |
| ADPGK   | 2.261868   |
| ADPRH   | 1.6000504  |
| ADPRHL2 | 1.0169549  |
| ADPRM   | 1.556418   |
| ADRB2   | 1.8140187  |
| ADRBK1  | 1.6208353  |
| ADRBK2  | 1.209197   |
| ADSS    | 0.8829632  |
| ADSSL1  | 1.227798   |
| AEBP2   | 1.5179214  |
| AEN     | 2.4261208  |
| AFF2    | 1.1817243  |
| AFTPH   | 1.5927386  |
| AGAP1   | 0.67808247 |
| AGFG1   | 1.3663144  |
| AGGF1   | 1.4335175  |
| AGK     | 1.1113486  |
| AGO2    | 1.395349   |
| AGO3    | 1.1778519  |
| AGPAT5  | 1.7909317  |
| AGPAT6  | 2.1496663  |
| AGPAT9  | 2.3100352  |
| AHCTF1  | 0.67486095 |
| AHCYL1  | 1.568572   |
| AHSA1   | 2.2722735  |
| AIFM2   | 1.0522888  |
| AIMP1   | 1.6223149  |
| AIMP2   | 2.2560034  |
| AIP     | 1.2847738  |
| AK2     | 2.2627902  |
| AK6     | 2.0160503  |
| AKAP10  | 1.0820088  |
| AKAP11  | 1.1292353  |

|          |            |
|----------|------------|
| AKAP12   | 3.1898398  |
| AKAP7    | 0.9058871  |
| AKAP8L   | 1.0303588  |
| AKAP9    | 1.3505583  |
| AKIP1    | 0.8915987  |
| AKIRIN1  | 1.8377285  |
| AKIRIN2  | 1.2878566  |
| AKT2     | 1.873899   |
| ALAS1    | 1.8288217  |
| ALDH1A1  | 1.214911   |
| ALDOA    | 1.2331386  |
| ALG1     | 1.3960567  |
| ALG10B   | 1.1560855  |
| ALG13    | 1.6226094  |
| ALG9     | 1.8289862  |
| ALKBH1   | 2.109261   |
| ALKBH4   | 0.88979435 |
| ALKBH6   | 1.4844337  |
| ALKBH7   | 0.7000456  |
| ALKBH8   | 1.2260013  |
| ALPK1    | 2.7262845  |
| ALPL     | 1.8521595  |
| ALS2CR12 | 1.9992054  |
| ALYREF   | 1.9520655  |
| AMBRA1   | 1.7883139  |
| AMD2     | 0.8790412  |
| AMDHD2   | 0.7948065  |
| AMFR     | 2.3796425  |
| AMIGO1   | 1.0334814  |
| AMMECR1  | 1.1265562  |
| AMMECR1L | 2.12017    |
| AMN1     | 1.4488931  |
| AMPD2    | 2.173963   |
| AMZ2     | 1.0210519  |
| ANAPC1   | 1.1116571  |
| ANAPC11  | 0.98392534 |
| ANAPC15  | 1.0349607  |
| ANAPC16  | 0.929893   |
| ANAPC5   | 0.7880206  |
| ANAPC7   | 1.3829207  |
| ANGEL2   | 1.097691   |
| ANGPT2   | 1.8184762  |
| ANGPTL4  | 2.7977004  |
| ANKFY1   | 1.5989141  |
| ANKHD1   | 1.6466064  |

|          |            |
|----------|------------|
| ANKIB1   | 1.516232   |
| ANKLE2   | 0.6290288  |
| ANKRA2   | 0.9493141  |
| ANKRD11  | 1.6359963  |
| ANKRD13C | 1.7157936  |
| ANKRD16  | 0.82539034 |
| ANKRD17  | 1.5729661  |
| ANKRD22  | 5.034899   |
| ANKRD27  | 1.3440819  |
| ANKRD28  | 1.4046273  |
| ANKRD46  | 1.2923217  |
| ANKRD49  | 1.8363986  |
| ANKRD52  | 1.889893   |
| ANKRD9   | 1.3653135  |
| ANKZF1   | 2.0008135  |
| ANO10    | 1.2705097  |
| ANP32B   | 0.70823526 |
| ANXA6    | 0.84204483 |
| ANXA7    | 1.9786091  |
| AOX3     | 0.7523246  |
| AP1B1    | 1.7133203  |
| AP1M1    | 1.5381889  |
| AP1S1    | 1.2014332  |
| AP2A1    | 1.3614969  |
| AP2S1    | 1.396883   |
| AP3B1    | 1.7749949  |
| AP3D1    | 1.9415731  |
| AP3S1    | 1.9777098  |
| AP4B1    | 1.7267494  |
| AP4S1    | 1.0612247  |
| AP5B1    | 1.8146114  |
| AP5M1    | 1.4600339  |
| APAF1    | 2.1144776  |
| APBB1IP  | 1.226161   |
| APEH     | 1.5082808  |
| APH1B    | 1.6636086  |
| API5     | 1.25528    |
| APLP2    | 1.0245953  |
| APMAP    | 1.5941439  |
| APOLD1   | 2.4407392  |
| APOPT1   | 1.7415404  |
| APPBP2   | 1.3981943  |
| APPL1    | 1.5262637  |
| APRT     | 1.4277539  |
| AQR      | 1.2874918  |

|           |            |
|-----------|------------|
| ARAF      | 1.9719748  |
| ARAP1     | 1.2983875  |
| AREL1     | 2.094791   |
| ARF4      | 2.643612   |
| ARF5      | 1.0779424  |
| ARF6      | 1.8438458  |
| ARFGEF1   | 1.5119939  |
| ARFIP2    | 2.0207071  |
| ARG2      | 2.8394957  |
| ARGLU1    | 1.2914205  |
| ARHGAP17  | 1.2542272  |
| ARHGAP26  | 1.7566476  |
| ARHGAP42  | 0.9222741  |
| ARHGDIS   | 1.2492528  |
| ARHGGEF12 | 1.0276823  |
| ARHGGEF15 | 1.4641285  |
| ARID1A    | 1.126545   |
| ARID1B    | 1.0199599  |
| ARID4A    | 1.0624728  |
| ARID5A    | 3.7783036  |
| ARIH1     | 1.4552546  |
| ARIH2     | 1.8676772  |
| ARL1      | 2.3594904  |
| ARL16     | 0.89378667 |
| ARL4A     | 2.217959   |
| ARL5C     | 1.7921724  |
| ARL6IP4   | 0.8982816  |
| ARL6IP5   | 1.4961772  |
| ARL6IP6   | 2.018145   |
| ARL8A     | 2.2929106  |
| ARL8B     | 1.8364129  |
| ARMC8     | 1.3553581  |
| ARMCX5    | 1.0772142  |
| ARNT      | 1.3138742  |
| ARNTL     | 1.9061732  |
| ARPC1A    | 0.9504733  |
| ARPC1B    | 1.9371085  |
| ARPC2     | 1.3432221  |
| ARPC3     | 1.2726064  |
| ARPC4     | 1.4588189  |
| ARPC5     | 0.98877144 |
| ARPC5L    | 0.8366046  |
| ARPP19    | 1.1811554  |
| ARRB2     | 1.7545576  |
| ARRDC4    | 3.9845176  |

|         |            |
|---------|------------|
| ARSA    | 1.1730523  |
| ARSG    | 1.8593173  |
| ARTN    | 1.2414763  |
| AS3MT   | 1.8559241  |
| ASAP3   | 1.3654456  |
| ASB13   | 1.1834621  |
| ASB4    | 2.147494   |
| ASB6    | 1.4556603  |
| ASB7    | 1.0578823  |
| ASCC2   | 0.99363565 |
| ASH1L   | 1.3166547  |
| ASNS    | 2.3094916  |
| ASNSD1  | 1.0657377  |
| ASPRV1  | 4.2574534  |
| ASUN    | 1.649929   |
| ASXL1   | 1.1526484  |
| ASXL2   | 0.7489438  |
| ATAD1   | 1.8393812  |
| ATAD2B  | 0.8435664  |
| ATAD3A  | 2.3262997  |
| ATE1    | 0.79451275 |
| ATF1    | 1.4574051  |
| ATF2    | 1.1681762  |
| ATF3    | 4.1645656  |
| ATF4    | 2.428388   |
| ATF6    | 1.7532005  |
| ATF7IP  | 1.2639074  |
| ATG101  | 1.1222978  |
| ATG12   | 1.2063689  |
| ATG14   | 1.5014277  |
| ATG16L1 | 2.1908393  |
| ATG2B   | 1.3835092  |
| ATG3    | 1.806428   |
| ATG4B   | 1.6612608  |
| ATG4D   | 1.6861696  |
| ATG7    | 0.9277034  |
| ATG9A   | 1.7670941  |
| ATIC    | 1.1082749  |
| ATP10D  | 1.7801251  |
| ATP11A  | 1.8349886  |
| ATP11B  | 1.5203834  |
| ATP11C  | 2.0893135  |
| ATP13A1 | 1.8761959  |
| ATP13A3 | 0.93612385 |
| ATP1A1  | 1.149662   |

|            |            |
|------------|------------|
| ATP1B3     | 1.1621733  |
| ATP2A2     | 1.5847449  |
| ATP5G2     | 0.99579763 |
| ATP5G3     | 2.516543   |
| ATP6AP1    | 1.2064552  |
| ATP6AP2    | 1.6306481  |
| ATP6V0A1   | 1.4144139  |
| ATP6V0A2   | 1.4545784  |
| ATP6V0A4   | 3.346972   |
| ATP6V0B    | 2.0083232  |
| ATP6V0C    | 1.8897929  |
| ATP6V1A    | 1.4274211  |
| ATP6V1B2   | 1.5653911  |
| ATP6V1C1   | 1.6082735  |
| ATP6V1D    | 2.0947008  |
| ATP6V1E1   | 1.613225   |
| ATP6V1F    | 1.3522768  |
| ATP6V1G1   | 1.1893225  |
| ATP6V1H    | 2.169465   |
| ATP8B1     | 2.7991338  |
| ATP9A      | 1.7937818  |
| ATP9B      | 0.94473815 |
| ATR        | 1.2646623  |
| ATXN10     | 1.0362124  |
| ATXN2      | 1.5190511  |
| ATXN2L     | 2.349214   |
| ATXN7      | 2.0124903  |
| ATXN7L1OS2 | 2.3892374  |
| ATXN7L3B   | 1.8010192  |
| AU017193   | 1.816819   |
| AU019202   | 1.5483282  |
| AU019823   | 1.3565912  |
| AU040320   | 1.5564837  |
| AU040972   | 1.4449787  |
| AURKAIP1   | 1.6840205  |
| AVEN       | 1.7894983  |
| AVL9       | 1.7783093  |
| AVPI1      | 1.1799803  |
| AXIN1      | 1.0598836  |
| AZI2       | 1.879756   |
| AZIN1      | 1.4180493  |
| B2M        | 1.5585384  |
| B3GALNT2   | 1.8582177  |
| B3GALT6    | 1.6160231  |
| B3GNT2     | 1.2370725  |

|         |            |
|---------|------------|
| B4GALT1 | 2.1183004  |
| B4GALT5 | 1.4846735  |
| B9D2    | 1.3097129  |
| BABAM1  | 1.6476316  |
| BACH1   | 2.2413678  |
| BAD     | 0.8827567  |
| BAG5    | 1.2422137  |
| BAG6    | 1.42029    |
| BAHD1   | 1.0564866  |
| BAK1    | 1.5807009  |
| BANF1   | 1.7662964  |
| BAP1    | 2.526144   |
| BATF    | 3.3163033  |
| BATF2   | 2.8192844  |
| BATF3   | 3.1917677  |
| BAX     | 2.3578677  |
| BAZ1A   | 1.2628074  |
| BAZ2A   | 0.97736835 |
| BBS9    | 0.87458897 |
| BBX     | 0.8439996  |
| BCAS2   | 1.5184526  |
| BCAT2   | 1.1409192  |
| BCCIP   | 2.6018581  |
| BCL10   | 2.5660462  |
| BCL2A1C | 3.2369423  |
| BCL2A1D | 2.7446132  |
| BCL2L1  | 2.414969   |
| BCL2L13 | 0.9952736  |
| BCL3    | 4.8442125  |
| BCL6    | 1.8311315  |
| BCL7B   | 1.3235826  |
| BCLAF1  | 1.4608788  |
| BCOR    | 1.0025959  |
| BCR     | 1.3873072  |
| BDP1    | 1.360796   |
| BECN1   | 1.7568092  |
| BEND3   | 1.5167546  |
| BEST2   | 0.9566345  |
| BFAR    | 2.33319    |
| BHLHE40 | 2.3483891  |
| BID     | 2.9501457  |
| BIN3    | 1.0105443  |
| BIRC2   | 4.5488963  |
| BIRC3   | 2.724102   |
| BIRC6   | 1.2058024  |

|         |            |
|---------|------------|
| BLCAP   | 2.036344   |
| BLMH    | 1.6236777  |
| BLOC1S1 | 1.5841107  |
| BLOC1S2 | 0.97629213 |
| BLOC1S4 | 2.0858655  |
| BLOC1S6 | 1.4883909  |
| BLZF1   | 1.870543   |
| BMP2    | 2.5733528  |
| BMP2K   | 0.7696996  |
| BMPER   | 1.2856245  |
| BMS1    | 1.5489192  |
| BNIP1   | 1.5411296  |
| BNIP3   | 1.9726887  |
| BNIP3L  | 0.714993   |
| BOD1    | 1.279913   |
| BOLA2   | 1.7775955  |
| BOP1    | 2.1311617  |
| BPIFC   | 1.7643328  |
| BPTF    | 0.8099251  |
| BRAF    | 1.1547842  |
| BRAP    | 1.4394507  |
| BRAT1   | 1.1051607  |
| BRCC3   | 0.89519405 |
| BRD1    | 1.0039032  |
| BRD2    | 1.084063   |
| BRD4    | 0.97093487 |
| BRD7    | 0.8718281  |
| BRD8    | 1.5188086  |
| BRE     | 1.3688269  |
| BRI3    | 0.98726416 |
| BRI3BP  | 1.1943822  |
| BRIX1   | 2.2741408  |
| BRMS1   | 1.4130545  |
| BROX    | 1.2333286  |
| BRPF1   | 1.6469398  |
| BRPF3   | 1.4055333  |
| BRWD1   | 0.83552694 |
| BST2    | 3.4108706  |
| BTA1    | 0.9512601  |
| BTBD1   | 0.89103365 |
| BTBD16  | 1.888207   |
| BTF3    | 1.698863   |
| BTF3L4  | 1.5025525  |
| BTG1    | 1.259203   |
| BTG2    | 2.6248994  |



|           |            |
|-----------|------------|
| BTN1A1    | 2.083898   |
| BUB3      | 1.5154128  |
| BUD13     | 1.18611    |
| BUD31     | 1.9516048  |
| BZW1      | 2.1098003  |
| C1GALT1   | 1.492095   |
| C1GALT1C1 | 1.2615261  |
| C1QA      | 1.6404657  |
| C1QB      | 1.6239867  |
| C1QBP     | 2.2944613  |
| C1QC      | 1.7620654  |
| C1QTNF9   | 1.6535399  |
| C1RA      | 3.1824574  |
| C5AR1     | 1.83496    |
| C6        | 0.9758997  |
| CAAP1     | 1.8354666  |
| CABLES2   | 1.2232099  |
| CABP5     | 1.198906   |
| CACTIN    | 1.6815071  |
| CACUL1    | 2.2708154  |
| CACYBP    | 2.2348032  |
| CADPS     | 0.66185427 |
| CALM1     | 1.1777372  |
| CALR      | 2.4570813  |
| CALU      | 2.022325   |
| CAMSAP1   | 1.2773352  |
| CAMSAP3   | 0.8281584  |
| CAMTA2    | 2.3200326  |
| CAND1     | 1.2683759  |
| CANT1     | 1.2843983  |
| CANX      | 1.7151651  |
| CAP1      | 1.377779   |
| CAPN7     | 1.3498673  |
| CAPRIN1   | 1.0372534  |
| CAPZA1    | 1.9894962  |
| CAPZA2    | 1.7721186  |
| CAPZB     | 1.636518   |
| CAR13     | 2.5999556  |
| CARHSP1   | 2.1741314  |
| CARKD     | 1.2517776  |
| CARM1     | 1.3635125  |
| CARS      | 2.4366522  |
| CASC3     | 1.3997498  |
| CASP1     | 1.507772   |
| CASP4     | 3.2127967  |

|          |            |
|----------|------------|
| CASP6    | 1.276854   |
| CASP7    | 1.927382   |
| CASP8    | 2.3840208  |
| CASP8AP2 | 0.952343   |
| CBL      | 1.1728709  |
| CBLB     | 1.4210019  |
| CBLL1    | 0.97771835 |
| CBWD1    | 1.3697464  |
| CBX1     | 0.80255556 |
| CBX4     | 0.9313979  |
| CC2D1A   | 0.9473977  |
| CC2D1B   | 1.0741515  |
| CCAR1    | 1.7085948  |
| CCBL1    | 3.006569   |
| CCDC101  | 2.0342789  |
| CCDC106  | 1.430021   |
| CCDC115  | 0.78336906 |
| CCDC117  | 1.795423   |
| CCDC120  | 1.0173879  |
| CCDC124  | 1.5259833  |
| CCDC126  | 0.809597   |
| CCDC132  | 1.688344   |
| CCDC137  | 0.65341926 |
| CCDC138  | 1.8498559  |
| CCDC144B | 1.2295775  |
| CCDC163  | 1.6597433  |
| CCDC22   | 1.4695077  |
| CCDC3    | 0.9829478  |
| CCDC43   | 1.3391101  |
| CCDC53   | 1.533606   |
| CCDC55   | 1.7578297  |
| CCDC6    | 1.2977185  |
| CCDC66   | 1.1814818  |
| CCDC71L  | 2.3739228  |
| CCDC77   | 0.8617058  |
| CCDC80   | 1.0015264  |
| CCDC82   | 1.2903271  |
| CCDC86   | 2.5955691  |
| CCDC88B  | 2.469676   |
| CCDC97   | 1.2681761  |
| CCL1     | 1.0904148  |
| CCL19    | 3.0358367  |
| CCL2     | 6.036657   |
| CCL3     | 5.719592   |
| CCL4     | 4.430876   |

|         |            |
|---------|------------|
| CCL5    | 1.3589654  |
| CCL7    | 4.879653   |
| CCM2    | 1.1940084  |
| CCNC    | 0.7201812  |
| CCNDBP1 | 0.66643953 |
| CCNE1   | 1.226943   |
| CCNH    | 1.3098931  |
| CCNI    | 1.0050635  |
| CCNK    | 1.8325853  |
| CCNL1   | 2.861638   |
| CCNL2   | 2.1979432  |
| CCNT1   | 1.9562607  |
| CCNT2   | 1.5060725  |
| CCNYL1  | 1.5333266  |
| CCP110  | 1.9631982  |
| CCPG1   | 0.9035473  |
| CCPG1OS | 1.0212564  |
| CCR9    | 0.91664433 |
| CCRL2   | 2.317933   |
| CCRN4L  | 2.2377234  |
| CCT2    | 2.0320244  |
| CCT3    | 2.5132627  |
| CCT4    | 2.0327616  |
| CCT5    | 1.525362   |
| CCT6A   | 2.3012352  |
| CCT7    | 1.5751915  |
| CCT8    | 2.3742785  |
| CCZ1    | 1.3645816  |
| CD14    | 6.529488   |
| CD164   | 1.7647924  |
| CD274   | 3.027197   |
| CD300LG | 1.2023201  |
| CD33    | 3.1591215  |
| CD38    | 3.020606   |
| CD3EAP  | 1.5243421  |
| CD40    | 2.4682698  |
| CD44    | 1.0964503  |
| CD47    | 2.195475   |
| CD48    | 1.0124125  |
| CD55    | 1.6650519  |
| CD68    | 0.9526658  |
| CD69    | 3.4387627  |
| CD72    | 1.3115101  |
| CD74    | 1.5408154  |
| CD82    | 1.6175828  |

|            |            |
|------------|------------|
| CD86       | 1.2704403  |
| CDC123     | 1.9569159  |
| CDC16      | 1.2942023  |
| CDC26      | 0.9613061  |
| CDC37      | 1.5623918  |
| CDC37L1    | 1.8568087  |
| CDC42      | 1.3695054  |
| CDC42EP2   | 2.6403556  |
| CDC5L      | 1.1946707  |
| CDC73      | 1.3355598  |
| CDCA4      | 1.4946113  |
| CDIPT      | 0.8683357  |
| CDK10      | 1.2706685  |
| CDK11B     | 1.6146822  |
| CDK12      | 1.1990232  |
| CDK13      | 0.7020538  |
| CDK17      | 2.3615098  |
| CDK18      | 1.8746958  |
| CDK2       | 1.0588434  |
| CDK2AP1    | 1.0060987  |
| CDK4       | 1.003829   |
| CDK5R1     | 1.3896306  |
| CDK7       | 2.1423678  |
| CDK8       | 1.3545804  |
| CDK9       | 1.3393927  |
| CDKAL1     | 1.0686827  |
| CDKN1A     | 3.1498032  |
| CDKN1B     | 1.2232575  |
| CDKN2AIP   | 1.4319584  |
| CDKN2AIPNL | 1.7667594  |
| CDYL       | 1.1091893  |
| CEBPB      | 3.3846107  |
| CEBPD      | 3.6766734  |
| CEBPG      | 2.697423   |
| CEBPZ      | 2.4776564  |
| CEBPZOS    | 0.63767576 |
| CECR5      | 2.8396628  |
| CELF1      | 1.9534101  |
| CELSR3     | 1.9008553  |
| CENPJ      | 0.68346643 |
| CENPL      | 1.717278   |
| CENPO      | 1.044719   |
| CENPW      | 0.6470442  |
| CEP120     | 0.95496917 |
| CEP162     | 1.1417689  |

|         |            |
|---------|------------|
| CEP170  | 1.2396064  |
| CEP170B | 1.9218326  |
| CEP350  | 1.9076447  |
| CEP57   | 1.1777935  |
| CEP63   | 1.5075135  |
| CEP95   | 1.8129544  |
| CEPT1   | 2.0501719  |
| CERS2   | 1.4997888  |
| CERS6   | 2.5813293  |
| CETN3   | 0.88762236 |
| CFDP1   | 1.7843595  |
| CFL1    | 1.4677305  |
| CFL2    | 1.5052915  |
| CFLAR   | 2.353026   |
| CGGBP1  | 1.0631213  |
| CH25H   | 3.922731   |
| CHAMP1  | 1.5093791  |
| CHCHD1  | 2.1385608  |
| CHCHD2  | 2.2291822  |
| CHCHD4  | 2.3364835  |
| CHCHD6  | 1.154933   |
| CHD1    | 1.5902588  |
| CHD2    | 1.1314182  |
| CHD4    | 0.9491868  |
| CHD7    | 2.46459    |
| CHD8    | 1.6696224  |
| CHD9    | 0.84771585 |
| CHERP   | 1.7237868  |
| CHFR    | 1.3751321  |
| CHIC2   | 1.9471164  |
| CHIL1   | 2.4854746  |
| CHKA    | 2.7545128  |
| CHKB    | 1.890686   |
| CHM     | 1.4970102  |
| CHMP1A  | 1.0947323  |
| CHMP2A  | 1.8327236  |
| CHMP2B  | 1.3739667  |
| CHMP3   | 1.3371468  |
| CHMP4B  | 1.3788004  |
| CHMP5   | 1.1569366  |
| CHMP6   | 1.3035064  |
| CHMP7   | 1.4676871  |
| CHORDC1 | 1.9994264  |
| CHP1    | 1.5517821  |
| CHPT1   | 0.8510866  |

|         |            |
|---------|------------|
| CHRAC1  | 1.7098408  |
| CHRM3   | 3.508911   |
| CHST15  | 1.2906256  |
| CHTOP   | 1.7383046  |
| CIAPIN1 | 2.1927524  |
| CIC     | 0.9953108  |
| CIDEC   | 1.2985597  |
| CIRH1A  | 2.1754947  |
| CISD2   | 1.2111135  |
| CISH    | 3.536919   |
| CKS1B   | 1.2619829  |
| CLASRP  | 1.1501613  |
| CLCC1   | 1.6134725  |
| CLCN4-2 | 2.0891151  |
| CLCN7   | 1.6316051  |
| CLCNKB  | 0.7300303  |
| CLDN25  | 1.4590006  |
| CLEC4A1 | 2.0523348  |
| CLEC4D  | 3.3222904  |
| CLEC4E  | 5.018941   |
| CLEC4N  | 1.1640897  |
| CLHC1   | 1.1142633  |
| CLIC1   | 1.3963499  |
| CLINT1  | 1.7481122  |
| CLIP1   | 1.4471059  |
| CLK1    | 1.75354    |
| CLK2    | 1.2911763  |
| CLK3    | 1.0675154  |
| CLK4    | 2.1182418  |
| CLMN    | 1.7776213  |
| CLN5    | 1.977531   |
| CLNS1A  | 1.576468   |
| CLOCK   | 1.1920867  |
| CLPTM1  | 1.7510767  |
| CLTA    | 1.5498052  |
| CLTB    | 1.9873004  |
| CLTC    | 1.4629803  |
| CMIP    | 1.6214261  |
| CMPK1   | 1.9490681  |
| CMPK2   | 1.6954398  |
| CMSS1   | 0.9639473  |
| CMTM6   | 1.3799119  |
| CMTM8   | 0.79346514 |
| CMTR1   | 1.932096   |
| CMYA5   | 1.7499981  |

|         |            |
|---------|------------|
| CNBP    | 1.4944363  |
| CNDP2   | 1.402472   |
| CNEP1R1 | 1.2733293  |
| CNIH1   | 2.5574832  |
| CNIH4   | 1.1174846  |
| CNKSR3  | 2.479186   |
| CNN3    | 2.0574608  |
| CNNM2   | 1.4659896  |
| CNNM3   | 1.1789842  |
| CNNM4   | 1.2713051  |
| CNOT1   | 1.1899304  |
| CNOT10  | 1.1193094  |
| CNOT2   | 1.0960336  |
| CNOT4   | 1.6959257  |
| CNOT6   | 0.9993682  |
| CNOT6L  | 2.1856136  |
| CNOT7   | 1.0525994  |
| CNOT8   | 0.90004873 |
| CNPPD1  | 1.2490826  |
| CNPY3   | 1.9483733  |
| CNR2    | 0.87910366 |
| COA3    | 1.3698955  |
| COA5    | 1.4386406  |
| COG1    | 0.6716361  |
| COG2    | 1.9206738  |
| COG4    | 0.91461515 |
| COIL    | 1.3204198  |
| COL17A1 | 1.8492827  |
| COMMD10 | 1.2046242  |
| COMMD4  | 1.3484511  |
| COMMD7  | 1.1939473  |
| COMTD1  | 1.8723245  |
| COPS2   | 2.1453037  |
| COPS4   | 2.239335   |
| COPS7A  | 1.7300663  |
| COPS8   | 1.910615   |
| COQ10A  | 0.81943464 |
| COQ10B  | 2.4123669  |
| COQ2    | 1.6089783  |
| COQ5    | 2.116664   |
| CORIN   | 1.117295   |
| CORO1B  | 1.155643   |
| CORO7   | 1.0646281  |
| COX11   | 2.0980768  |
| COX14   | 1.019454   |

|         |            |
|---------|------------|
| COX19   | 2.0451365  |
| COX2    | 1.6139269  |
| COX4I1  | 1.6655965  |
| COX6C   | 2.096024   |
| COX7A2L | 1.0809422  |
| CPEB2   | 1.2954636  |
| CPEB4   | 1.7824631  |
| CPNE3   | 1.0582304  |
| CPSF1   | 1.8225894  |
| CPSF2   | 1.7860799  |
| CPSF3   | 1.6171355  |
| CPSF3L  | 1.4937444  |
| CPSF4   | 1.7101846  |
| CPSF6   | 1.5776958  |
| CPSF7   | 1.7310319  |
| CR1L    | 1.5271273  |
| CRAMP1L | 1.1222677  |
| CRBN    | 1.6462836  |
| CREB5   | 1.9641981  |
| CREBBP  | 1.3659277  |
| CREBL2  | 1.103693   |
| CREBZF  | 1.2134471  |
| CRIP3   | 1.0844889  |
| CRIPT   | 1.3733821  |
| CRK     | 1.9467292  |
| CRLF2   | 1.3836045  |
| CRTC1   | 0.8152108  |
| CRTC2   | 2.375105   |
| CRTC3   | 1.3000765  |
| CRY1    | 2.2494187  |
| CRYZL1  | 1.1926966  |
| CSDE1   | 1.2580643  |
| CSE1L   | 1.9644179  |
| CSF1    | 2.8987136  |
| CSF1R   | 1.0478721  |
| CSF2RA  | 1.9481878  |
| CSF2RB  | 2.5957346  |
| CSF2RB2 | 2.2263346  |
| CSF3R   | 1.9103594  |
| CSNK1A1 | 1.568572   |
| CSNK1D  | 1.5339651  |
| CSNK1G1 | 1.265027   |
| CSNK1G2 | 0.79881    |
| CSNK1G3 | 0.97941685 |
| CSNK2A1 | 1.6031194  |



|         |            |
|---------|------------|
| CSNK2A2 | 1.3440485  |
| CSNK2B  | 1.6337824  |
| CSPP1   | 1.3658845  |
| CSPRS   | 0.9618249  |
| CSRNP1  | 3.5877957  |
| CSRP2   | 1.6299782  |
| CSRP3   | 2.5284886  |
| CSTF1   | 1.9973445  |
| CSTF2   | 1.0247867  |
| CSTF2T  | 1.8518629  |
| CSTF3   | 1.9093552  |
| CTCF    | 1.0455222  |
| CTDNEP1 | 1.5738206  |
| CTDP1   | 1.8490591  |
| CTDSP1  | 1.4306388  |
| CTLA2B  | 1.060802   |
| CTNNB1  | 1.0555081  |
| CTNNBL1 | 1.2334132  |
| CTNND1  | 0.9072175  |
| CTPS2   | 1.1643496  |
| CTSA    | 2.4683347  |
| CTSB    | 2.2591586  |
| CTSC    | 1.7853441  |
| CTSD    | 1.20642    |
| CTSH    | 1.0346847  |
| CTSO    | 1.5191371  |
| CTSS    | 0.83475494 |
| CTSZ    | 2.2793827  |
| CTTN    | 1.5080843  |
| CTU2    | 1.9067187  |
| CUL1    | 1.8782301  |
| CUL2    | 1.7823639  |
| CUL3    | 1.4255309  |
| CUL4A   | 1.9556203  |
| CUL4B   | 1.6984258  |
| CUL5    | 1.3983016  |
| CWC15   | 1.5986247  |
| CWC22   | 1.4308677  |
| CWC25   | 1.4880047  |
| CWC27   | 1.2242513  |
| CXCL1   | 5.365581   |
| CXCL10  | 4.8744035  |
| CXCL11  | 1.6523962  |
| CXCL2   | 8.263842   |
| CXCL3   | 3.6419559  |

|          |            |
|----------|------------|
| CXCL5    | 2.840157   |
| CXCL9    | 4.479806   |
| CXXC1    | 1.90379    |
| CYB561   | 1.3449016  |
| CYB561D2 | 1.9961042  |
| CYB5R4   | 1.4758544  |
| CYBB     | 2.162806   |
| CYCS     | 2.3070683  |
| CYFIP1   | 1.0401373  |
| CYP20A1  | 0.8114331  |
| CYP2U1   | 1.9722457  |
| CYP7B1   | 3.2050166  |
| CYPT4    | 2.6388197  |
| CYSLTR2  | 1.3316619  |
| CYTH1    | 1.433919   |
| CYTH2    | 1.2468538  |
| CYTH4    | 1.1118126  |
| DAD1     | 2.1798224  |
| DANCR    | 2.1229892  |
| DAP3     | 2.0527067  |
| DAPK3    | 1.2533295  |
| DAXX     | 2.112113   |
| DAZAP1   | 1.273613   |
| DAZAP2   | 0.934916   |
| DBN1     | 2.0407915  |
| DBNL     | 1.5606089  |
| DBR1     | 1.0026531  |
| DCAF10   | 1.4626782  |
| DCAF12L2 | 1.9218478  |
| DCAF13   | 1.928433   |
| DCAF6    | 0.9939711  |
| DCAF8    | 1.1919675  |
| DCC      | 3.539279   |
| DCP1A    | 1.375854   |
| DCP1B    | 1.0924234  |
| DCTN2    | 1.0874448  |
| DCTN3    | 1.4528637  |
| DCTN4    | 0.73325634 |
| DCTN5    | 1.2786217  |
| DCUN1D1  | 1.1754656  |
| DCUN1D2  | 1.3574953  |
| DCUN1D5  | 1.7747402  |
| DDA1     | 1.5314517  |
| DDB1     | 1.9408827  |
| DDHD1    | 1.9366417  |

|         |            |
|---------|------------|
| DDI2    | 2.6316586  |
| DDIT4   | 2.2749934  |
| DDX1    | 2.3334913  |
| DDX10   | 1.790463   |
| DDX17   | 1.4723296  |
| DDX18   | 1.7432637  |
| DDX20   | 1.4195614  |
| DDX24   | 1.5856414  |
| DDX39   | 2.1122103  |
| DDX39B  | 1.4795141  |
| DDX3X   | 1.835401   |
| DDX41   | 1.576747   |
| DDX42   | 1.2370348  |
| DDX46   | 0.97793627 |
| DDX47   | 1.1867342  |
| DDX5    | 1.541081   |
| DDX50   | 2.0339928  |
| DDX51   | 1.1663136  |
| DDX52   | 1.6433339  |
| DDX54   | 2.0225968  |
| DDX58   | 1.7575588  |
| DEDD    | 0.95782757 |
| DEDD2   | 1.8477712  |
| DEGS1   | 1.5746813  |
| DENND1A | 0.94304633 |
| DENND1B | 0.9465771  |
| DENND2D | 1.3609638  |
| DENND4A | 1.9410176  |
| DENND5B | 1.4424229  |
| DENND6B | 1.5880573  |
| DERL2   | 2.2092485  |
| DESI2   | 2.3240304  |
| DFFB    | 1.1254168  |
| DGAT1   | 1.5044637  |
| DGCR14  | 1.0040135  |
| DGCR2   | 0.7702751  |
| DGCR8   | 1.0322764  |
| DGUOK   | 1.218586   |
| DHPS    | 1.1636486  |
| DHRS7B  | 0.76231766 |
| DHX15   | 2.4359674  |
| DHX16   | 1.0981731  |
| DHX29   | 1.0326476  |
| DHX30   | 1.5043569  |
| DHX33   | 1.1577411  |

|         |            |
|---------|------------|
| DHX35   | 0.94836664 |
| DHX36   | 1.2826443  |
| DHX38   | 1.8988347  |
| DHX40   | 1.8168654  |
| DHX58   | 1.6179304  |
| DHX8    | 0.7790127  |
| DIABLO  | 1.978704   |
| DIAP2   | 1.0181179  |
| DICER1  | 0.87518406 |
| DIDO1   | 0.7936888  |
| DIEXF   | 1.9597063  |
| DIMT1   | 2.008214   |
| DIP2C   | 0.8356862  |
| DIS3    | 1.8192797  |
| DIS3L   | 1.4159188  |
| DIS3L2  | 0.90120554 |
| DKC1    | 1.8286314  |
| DLGAP4  | 1.7245798  |
| DLST    | 1.9984331  |
| DMAP1   | 1.3845501  |
| DMPK    | 1.1605363  |
| DMTF1   | 2.5382593  |
| DMTN    | 1.5848956  |
| DMWD    | 1.3614388  |
| DMXL1   | 1.6969879  |
| DMXL2   | 1.82265    |
| DNA2    | 0.84828925 |
| DNAIC1  | 0.7996187  |
| DNAJA1  | 2.5282536  |
| DNAJA2  | 2.0523748  |
| DNAJB1  | 1.7630978  |
| DNAJB14 | 0.97231054 |
| DNAJB2  | 2.4438114  |
| DNAJB6  | 1.7286439  |
| DNAJC1  | 1.5133176  |
| DNAJC13 | 1.8956695  |
| DNAJC15 | 1.9110937  |
| DNAJC18 | 1.0468316  |
| DNAJC24 | 1.2145333  |
| DNAJC30 | 1.6196184  |
| DNAJC5  | 1.5690274  |
| DNAL4   | 0.80384636 |
| DNLZ    | 2.1409364  |
| DNM1L   | 1.2193375  |
| DNM2    | 1.6740384  |

|            |            |
|------------|------------|
| DNTTIP1    | 1.1151042  |
| DNTTIP2    | 1.8880296  |
| DOC2G      | 0.6971965  |
| DOCK4      | 1.435049   |
| DOCK5      | 1.802011   |
| DOHH       | 1.1713805  |
| DOK2       | 2.095448   |
| DOK3       | 1.3485107  |
| DOLK       | 0.8038573  |
| DOLPP1     | 1.4754591  |
| DONSON     | 2.364174   |
| DOPEY2     | 1.3649979  |
| DOS        | 1.1435051  |
| DOT1L      | 1.5884714  |
| DPCD       | 0.7247343  |
| DPF2       | 1.6844115  |
| DPH2       | 2.0214128  |
| DPH7       | 0.9629619  |
| DPM1       | 1.537909   |
| DPM2       | 1.5484953  |
| DPP6       | 1.7014809  |
| DPP8       | 1.3184495  |
| DPY30      | 0.91723394 |
| DR1        | 1.8987103  |
| DRAM2      | 1.3110552  |
| DRG1       | 2.2044535  |
| DSCR3      | 1.050951   |
| DSE        | 1.4410048  |
| DST        | 1.2245326  |
| DSTN       | 1.6305676  |
| DTNBP1     | 1.6163402  |
| DTX2       | 1.8946018  |
| DTX3L      | 2.0342607  |
| DTYMK      | 1.2440681  |
| DUS2       | 2.2019758  |
| DUS3L      | 1.6336923  |
| DUSP11     | 1.3256149  |
| DUSP16     | 2.8392477  |
| DUSP2      | 3.7428002  |
| DUSP8      | 2.3393917  |
| DVL1       | 1.8014717  |
| DVL3       | 0.8513508  |
| DXERTD223E | 0.6902778  |
| DXO        | 1.6411276  |
| DYNC1H1    | 1.5806093  |

|          |            |
|----------|------------|
| DYNC1I2  | 0.91001844 |
| DYNC1LI1 | 1.0375638  |
| DYNLL2   | 1.1699781  |
| DYNLRB1  | 1.2241206  |
| DYNLT3   | 0.87600803 |
| DYRK1A   | 1.7041216  |
| DYRK2    | 1.1188974  |
| E2F5     | 1.4188452  |
| E2F6     | 1.2695737  |
| E4F1     | 1.1617112  |
| EAF1     | 1.5870843  |
| EAPP     | 1.919219   |
| EBAG9    | 1.6496935  |
| EBI3     | 3.342698   |
| EBNA1BP2 | 1.7393198  |
| ECD      | 1.5451503  |
| ECM1     | 1.6016479  |
| EDC4     | 1.5005951  |
| EDRF1    | 1.7126944  |
| EEA1     | 1.4242659  |
| EED      | 1.6485338  |
| EEF1A1   | 1.4689322  |
| EEF1B2   | 1.6727209  |
| EEF1D    | 1.5995111  |
| EEF1E1   | 2.339303   |
| EEF1G    | 1.4412675  |
| EEF2     | 1.8640308  |
| EFCAB14  | 1.0738616  |
| EFHD2    | 1.8048244  |
| EFR3A    | 1.21596    |
| EFTUD2   | 1.2546921  |
| EGFL8    | 0.9999566  |
| EGLN2    | 1.343637   |
| EGR1     | 3.327736   |
| EGR2     | 1.7729168  |
| EHD1     | 2.708778   |
| EHD3     | 1.1920776  |
| EHMT1    | 1.881402   |
| EHMT2    | 1.2379541  |
| EIF1     | 1.7533898  |
| EIF1A    | 3.1069016  |
| EIF1AX   | 1.2688937  |
| EIF1B    | 1.335177   |
| EIF1-PS  | 1.855197   |
| EIF2A    | 1.740974   |

|           |            |
|-----------|------------|
| EIF2AK2   | 2.4909716  |
| EIF2AK4   | 1.2013133  |
| EIF2B1    | 3.2056804  |
| EIF2B2    | 1.8850646  |
| EIF2B3    | 1.9753065  |
| EIF2B5    | 1.3408556  |
| EIF2S1    | 1.7851481  |
| EIF2S2    | 2.4930916  |
| EIF3A     | 2.127636   |
| EIF3B     | 1.8168793  |
| EIF3C     | 1.7761722  |
| EIF3D     | 2.2307997  |
| EIF3E     | 1.3616633  |
| EIF3F     | 1.3650517  |
| EIF3G     | 2.1783094  |
| EIF3H     | 0.912025   |
| EIF3I     | 1.6439261  |
| EIF3J1    | 1.6091857  |
| EIF3K     | 0.9957876  |
| EIF3L     | 1.371491   |
| EIF3M     | 1.6722493  |
| EIF4A1    | 2.2753263  |
| EIF4A2    | 1.22784    |
| EIF4A3    | 1.327971   |
| EIF4B     | 1.5031157  |
| EIF4E     | 1.4834089  |
| EIF4E3    | 1.3759341  |
| EIF4ENIF1 | 1.6911836  |
| EIF4G1    | 2.6298285  |
| EIF4G2    | 3.2314749  |
| EIF4G3    | 1.1777444  |
| EIF4H     | 1.5138102  |
| EIF5      | 1.845974   |
| EIF5A     | 2.1783466  |
| ELAVL1    | 1.8871851  |
| ELF2      | 1.694768   |
| ELF3      | 2.7178297  |
| ELK1      | 1.495595   |
| ELL       | 2.7104626  |
| ELOF1     | 1.2251029  |
| ELOVL5    | 1.4001598  |
| ELOVL7    | 1.5500517  |
| ELP5      | 1.7660022  |
| EMC1      | 0.85623026 |
| EMC2      | 1.563334   |

|          |            |
|----------|------------|
| EMC3     | 1.2788091  |
| EMC4     | 1.4352727  |
| EMC6     | 2.029089   |
| EME2     | 0.90381336 |
| EMG1     | 2.056386   |
| EMILIN1  | 1.335269   |
| EMILIN2  | 2.3659315  |
| EML3     | 0.6493244  |
| EML4     | 1.2666545  |
| EML6     | 1.6894138  |
| EMR4     | 1.8995214  |
| ENC1     | 2.9674635  |
| ENO1     | 1.7510386  |
| ENOX2    | 0.6305113  |
| ENPEP    | 0.9251189  |
| ENPP2    | 0.97925854 |
| ENPP4    | 2.2136526  |
| ENSA     | 0.95215416 |
| ENTHD2   | 1.9194727  |
| ENY2     | 2.2807522  |
| EP400    | 1.4594979  |
| EPB4.1   | 1.2445965  |
| EPB4.1L3 | 0.6970539  |
| EPC2     | 1.0390496  |
| EPHA5    | 1.8861337  |
| EPHA8    | 1.1250756  |
| EPHB2    | 1.1951714  |
| EPHB3    | 1.7541714  |
| EPM2AIP1 | 1.1392384  |
| EPN1     | 2.4227915  |
| EPPK1    | 2.9574594  |
| EPS15    | 0.88341427 |
| EPS15L1  | 1.3328557  |
| EPT1     | 1.5912967  |
| ERAL1    | 1.814107   |
| ERAP1    | 2.095172   |
| ERBB2IP  | 1.1416659  |
| ERCC2    | 1.4616175  |
| ERCC3    | 1.2612972  |
| ERCC4    | 0.7048478  |
| ERCC5    | 1.281836   |
| ERCC6    | 1.4695673  |
| ERCC8    | 1.1310122  |
| ERDR1    | 1.4007702  |
| ERGIC2   | 2.2451525  |



|          |            |
|----------|------------|
| ERH      | 1.9255824  |
| ERI1     | 1.1335399  |
| ERLIN1   | 2.0444736  |
| ERLIN2   | 1.073781   |
| ERMN     | 3.3003273  |
| ERMP1    | 1.0699553  |
| ERO1L    | 2.1684837  |
| ERP29    | 2.3204284  |
| ERP44    | 1.8490844  |
| ERRFI1   | 4.1874     |
| ESCO1    | 1.2509608  |
| ESF1     | 1.6264496  |
| ESR2     | 1.4342871  |
| ESRRA    | 1.2331848  |
| ETAA1    | 0.89358735 |
| ETF1     | 2.3958778  |
| ETNK1    | 1.1556811  |
| ETS2     | 2.383676   |
| ETV3     | 1.463789   |
| ETV6     | 3.249011   |
| EVI5L    | 0.89015627 |
| EXD1     | 1.7587576  |
| EXD2     | 2.212647   |
| EXOC3    | 0.77058315 |
| EXOC3L4  | 1.4888272  |
| EXOC5    | 1.3405857  |
| EXOC6    | 0.6253128  |
| EXOC6B   | 1.4098353  |
| EXOC7    | 0.983325   |
| EXOSC2   | 1.8427286  |
| EXOSC3   | 2.2178068  |
| EXOSC5   | 1.1760974  |
| EXOSC6   | 1.5689483  |
| EXOSC7   | 0.9329982  |
| EXOSC9   | 1.7577767  |
| EXTL3    | 1.4365592  |
| EYA1     | 1.9971194  |
| EYA3     | 2.653934   |
| EZH2     | 1.2023921  |
| F10      | 5.3397384  |
| F11R     | 1.6683283  |
| FABP4    | 1.7748704  |
| FAF1     | 1.328341   |
| FAF2     | 2.349309   |
| FAM103A1 | 1.000473   |

|          |            |
|----------|------------|
| FAM104A  | 1.5745325  |
| FAM107A  | 1.7070012  |
| FAM114A2 | 1.0784287  |
| FAM118A  | 1.8655949  |
| FAM118B  | 1.2008829  |
| FAM120A  | 1.6703534  |
| FAM120B  | 1.323286   |
| FAM122A  | 1.7291231  |
| FAM129C  | 1.0833039  |
| FAM132A  | 1.2594223  |
| FAM134C  | 0.83222675 |
| FAM151B  | 1.0843031  |
| FAM160A2 | 1.3100939  |
| FAM160B1 | 1.0498071  |
| FAM160B2 | 1.5460792  |
| FAM167B  | 1.8205228  |
| FAM168B  | 1.2954268  |
| FAM169B  | 2.476645   |
| FAM173A  | 1.2350965  |
| FAM178A  | 2.7354217  |
| FAM188A  | 1.7992144  |
| FAM192A  | 1.7968268  |
| FAM193A  | 1.4663968  |
| FAM193B  | 1.4107509  |
| FAM195B  | 0.85245514 |
| FAM199X  | 2.8560383  |
| FAM204A  | 1.1827359  |
| FAM206A  | 1.0147729  |
| FAM207A  | 1.3978176  |
| FAM208A  | 1.1822686  |
| FAM208B  | 2.1045823  |
| FAM21    | 1.6192365  |
| FAM210A  | 1.7034342  |
| FAM214B  | 1.2356615  |
| FAM32A   | 1.3476391  |
| FAM49A   | 0.7822795  |
| FAM50A   | 2.498942   |
| FAM53A   | 1.2368326  |
| FAM53C   | 1.7622356  |
| FAM58B   | 0.785357   |
| FAM63A   | 1.2961211  |
| FAM71D   | 2.9986968  |
| FAM76A   | 0.803452   |
| FAM76B   | 1.0678096  |
| FAM83G   | 0.9703784  |

|          |           |
|----------|-----------|
| FAM92A   | 1.7533367 |
| FAM96A   | 1.6568289 |
| FAM96B   | 2.120339  |
| FAM98B   | 1.5549302 |
| FANCE    | 1.0561781 |
| FAP      | 2.435192  |
| FARP1    | 1.2151723 |
| FARSA    | 1.6233659 |
| FARSB    | 2.2435274 |
| FAS      | 3.616722  |
| FASTKD1  | 1.6534169 |
| FASTKD3  | 2.3526735 |
| FAU      | 1.9461269 |
| FBL      | 2.2569165 |
| FBRS     | 1.4430141 |
| FBRSL1   | 1.1365948 |
| FBXL12   | 1.2039356 |
| FBXL12OS | 1.9737582 |
| FBXL15   | 2.0154152 |
| FBXL3    | 1.1903567 |
| FBXL5    | 2.548029  |
| FBXL6    | 0.9543915 |
| FBXO3    | 0.7730417 |
| FBXO33   | 1.4610887 |
| FBXO38   | 1.6828718 |
| FBXO4    | 1.5471315 |
| FBXO42   | 1.898489  |
| FBXO45   | 1.3322854 |
| FBXO46   | 1.6511512 |
| FBXO6    | 2.6114416 |
| FBXO7    | 1.7072601 |
| FBXW11   | 1.6507773 |
| FBXW4    | 1.1485271 |
| FBXW5    | 1.6163607 |
| FBXW7    | 0.6534486 |
| FBXW8    | 1.406795  |
| FCER1A   | 1.7656105 |
| FCER1G   | 2.3484263 |
| FCF1     | 1.6398525 |
| FCGR2B   | 2.481648  |
| FCHSD2   | 1.7021418 |
| FDX1     | 1.8589673 |
| FDX1L    | 1.7141829 |
| FEM1A    | 2.103004  |
| FEM1C    | 1.2141876 |

|          |            |
|----------|------------|
| FEN1     | 1.4085007  |
| FERMT2   | 1.1472912  |
| FERT2    | 1.480453   |
| FEZ2     | 1.4992437  |
| FGD3     | 1.4235768  |
| FGD4     | 1.2308841  |
| FGFR1OP  | 1.4042816  |
| FGFR1OP2 | 1.0712814  |
| FGFR2    | 1.1176772  |
| FGFRL1   | 0.8809571  |
| FGR      | 1.8545475  |
| FIP1L1   | 1.5897632  |
| FIS1     | 1.6599393  |
| FITM2    | 1.6000986  |
| FKBP1A   | 0.8865943  |
| FKBP3    | 1.1889267  |
| FKBP5    | 3.5005589  |
| FKRP     | 1.4609857  |
| FLCN     | 2.1179967  |
| FLNB     | 2.6495967  |
| FLOT1    | 2.1487107  |
| FLOT2    | 1.843926   |
| FMNL2    | 1.7568879  |
| FMO3     | 1.5793018  |
| FMR1     | 0.94490576 |
| FNBP4    | 1.7120574  |
| FNDC3A   | 2.5064917  |
| FNDC3B   | 2.995575   |
| FNIP1    | 1.7054586  |
| FNIP2    | 1.4562359  |
| FNTA     | 0.7846031  |
| FOCAD    | 2.0449147  |
| FOPNL    | 0.85032845 |
| FOSL1    | 3.3653264  |
| FOXC2    | 1.8997374  |
| FOXJ3    | 1.0686011  |
| FOXK2    | 1.6241183  |
| FOXL2    | 1.5337148  |
| FOXN2    | 1.7670965  |
| FOXO1    | 1.2234616  |
| FOXP4    | 1.7307329  |
| FOXQ1    | 2.1311731  |
| FPR1     | 4.144503   |
| FPR2     | 3.8984199  |
| FPR3     | 4.5699215  |

|           |            |
|-----------|------------|
| FRA10AC1  | 1.7372303  |
| FRAT1     | 1.0454788  |
| FRG1      | 0.9741039  |
| FRMD8OS   | 1.4781404  |
| FRS2      | 1.0810871  |
| FRYL      | 1.5351267  |
| FSCN1     | 2.1114826  |
| FTH1      | 2.0229979  |
| FUBP1     | 1.222614   |
| FUBP3     | 1.485076   |
| FUCA1     | 1.2248702  |
| FUK       | 1.0052981  |
| FUNDC1    | 1.2552209  |
| FURIN     | 2.0634556  |
| FUS       | 1.2795529  |
| FXR1      | 1.6904664  |
| FXR2      | 2.02282    |
| FYB       | 1.8606043  |
| FZD9      | 1.972301   |
| FZR1      | 1.0916471  |
| G3BP1     | 2.2348595  |
| GAA       | 1.2966204  |
| GAB3      | 3.6306834  |
| GABARAP   | 2.1134315  |
| GABARAPL1 | 1.5712523  |
| GABPB1    | 1.9792862  |
| GABPB2    | 0.8478341  |
| GADD45A   | 1.5899138  |
| GADD45B   | 2.7043138  |
| GADD45G   | 4.3793187  |
| GAK       | 1.3439412  |
| GALK2     | 1.2980423  |
| GALNS     | 1.7637043  |
| GALNT11   | 1.4247041  |
| GALNT2    | 0.78974533 |
| GALNT4    | 0.8851361  |
| GALNT7    | 1.0572033  |
| GANAB     | 2.3771129  |
| GAPDH     | 2.4485188  |
| GAPVD1    | 1.5257616  |
| GAR1      | 2.3225622  |
| GARS      | 1.6388454  |
| GAS2L1    | 0.9588399  |
| GAS5      | 1.6173716  |
| GAS6      | 1.1179333  |

|        |            |
|--------|------------|
| GATA5  | 1.4395449  |
| GATAD1 | 1.1410322  |
| GBA    | 3.0942163  |
| GBP10  | 3.2315884  |
| GBP2   | 2.5244002  |
| GBP2B  | 2.6178026  |
| GBP3   | 2.912171   |
| GBP5   | 3.3242822  |
| GBP6   | 4.1454525  |
| GBP7   | 2.993876   |
| GBP8   | 1.5849423  |
| GBP9   | 2.2511668  |
| GCA    | 0.88983846 |
| GCC1   | 1.7411432  |
| GCH1   | 4.0471363  |
| GCLC   | 2.2280927  |
| GCM1   | 2.7314315  |
| GCN1L1 | 1.3913698  |
| GDA    | 1.9317174  |
| GDAP10 | 3.4052563  |
| GDAP2  | 2.1879683  |
| GDE1   | 1.2144165  |
| GDI1   | 1.0803285  |
| GDI2   | 1.3836217  |
| GEM    | 2.128356   |
| GEMIN5 | 1.0537925  |
| GEMIN6 | 1.8338675  |
| GET4   | 0.9120574  |
| GFER   | 3.510365   |
| GGA1   | 1.209857   |
| GGA3   | 1.7676735  |
| GGCT   | 2.380005   |
| GGH    | 0.9387207  |
| GGNBP2 | 1.5124083  |
| GHDC   | 1.4407315  |
| GID8   | 1.286006   |
| GIGYF1 | 0.8868246  |
| GIGYF2 | 1.5974574  |
| GIMAP9 | 2.020009   |
| GINM1  | 1.5513916  |
| GINS3  | 1.0949364  |
| GIT2   | 1.0755277  |
| GKAP1  | 1.1415644  |
| GLA    | 1.169796   |
| GLG1   | 1.3012938  |

|         |            |
|---------|------------|
| GLIPR2  | 2.3265772  |
| GLRX    | 3.0610142  |
| GLRX2   | 1.679472   |
| GLRX3   | 1.6015925  |
| GLT8D1  | 1.5216737  |
| GLTSCR2 | 0.7533212  |
| GLUL    | 2.441484   |
| GLYR1   | 1.7615438  |
| GM10015 | 1.5585017  |
| GM10065 | 1.5976717  |
| GM10101 | 0.9125478  |
| GM10134 | 0.96846056 |
| GM10204 | 1.3814173  |
| GM10405 | 1.3447161  |
| GM10420 | 1.6315022  |
| GM10631 | 0.93494797 |
| GM10634 | 4.310249   |
| GM10636 | 0.91830826 |
| GM10653 | 1.6712885  |
| GM10693 | 2.067287   |
| GM10765 | 1.3351717  |
| GM10767 | 0.81957054 |
| GM10796 | 1.484297   |
| GM10839 | 1.8763943  |
| GM10845 | 1.7844143  |
| GM10856 | 1.2891698  |
| GM10872 | 3.489748   |
| GM10910 | 0.8379035  |
| GM10914 | 1.1590436  |
| GM11127 | 1.7349725  |
| GM1141  | 1.5272126  |
| GM11449 | 0.9520135  |
| GM11538 | 0.81923795 |
| GM11559 | 1.2978003  |
| GM11696 | 1.3493428  |
| GM11810 | 0.9720826  |
| GM11974 | 2.0877519  |
| GM12070 | 2.402079   |
| GM12216 | 0.93692446 |
| GM12250 | 2.1568942  |
| GM12447 | 1.5856285  |
| GM12508 | 1.7278819  |
| GM12618 | 1.5740156  |
| GM12693 | 1.4715486  |
| GM12758 | 1.26865    |

|         |            |
|---------|------------|
| GM12816 | 1.4289412  |
| GM12942 | 0.88116074 |
| GM1305  | 2.009059   |
| GM13215 | 1.0209594  |
| GM13570 | 2.135926   |
| GM13770 | 1.6186619  |
| GM13777 | 1.1594582  |
| GM13826 | 1.0433645  |
| GM14010 | 4.270259   |
| GM14135 | 0.89928913 |
| GM14378 | 0.9223523  |
| GM14432 | 1.5290303  |
| GM14548 | 2.0092845  |
| GM14635 | 1.2080464  |
| GM15056 | 2.8317652  |
| GM15348 | 2.052444   |
| GM15421 | 1.407659   |
| GM15645 | 2.7675533  |
| GM15772 | 2.0176783  |
| GM15998 | 1.4184008  |
| GM16340 | 2.2717252  |
| GM16381 | 1.3586102  |
| GM16853 | 1.6878574  |
| GM17745 | 1.5296154  |
| GM17748 | 1.1792407  |
| GM17757 | 1.8541958  |
| GM17821 | 1.9038982  |
| GM1943  | 1.2571502  |
| GM19840 | 0.96888256 |
| GM2016  | 2.9490209  |
| GM2099  | 1.0341082  |
| GM2270  | 0.9087181  |
| GM2347  | 0.7344215  |
| GM2382  | 2.07728    |
| GM2436  | 1.5863876  |
| GM2590  | 1.5441105  |
| GM3285  | 1.5393951  |
| GM3414  | 1.7029066  |
| GM3527  | 1.0801651  |
| GM4123  | 2.6737292  |
| GM4130  | 1.0562172  |
| GM4342  | 1.0483999  |
| GM4470  | 0.8536668  |
| GM4559  | 0.8540957  |
| GM4583  | 1.3683281  |



|        |            |
|--------|------------|
| GM4786 | 1.5936394  |
| GM4802 | 1.7023115  |
| GM4832 | 1.4560633  |
| GM4841 | 1.3015976  |
| GM4861 | 3.34787    |
| GM4889 | 1.2365742  |
| GM4951 | 3.208313   |
| GM4963 | 1.4168429  |
| GM4969 | 1.0982461  |
| GM4971 | 2.3728724  |
| GM4997 | 1.6141224  |
| GM5069 | 2.3379307  |
| GM5079 | 0.74386597 |
| GM5136 | 1.2902222  |
| GM5150 | 0.8274417  |
| GM5176 | 1.3455477  |
| GM5396 | 1.2876043  |
| GM5445 | 1.2644496  |
| GM5453 | 1.5546169  |
| GM5483 | 3.9884377  |
| GM5523 | 2.3356247  |
| GM5528 | 0.9228091  |
| GM5595 | 0.91332626 |
| GM561  | 0.89133024 |
| GM5637 | 3.2265925  |
| GM5766 | 1.9188123  |
| GM5779 | 0.8763027  |
| GM5785 | 1.1130784  |
| GM5848 | 0.9632158  |
| GM5878 | 0.9671359  |
| GM5879 | 1.1970282  |
| GM5908 | 1.8050828  |
| GM6034 | 1.5157528  |
| GM6109 | 1.3434472  |
| GM6115 | 1.2756472  |
| GM6155 | 1.1976609  |
| GM6211 | 1.789432   |
| GM6251 | 1.1321917  |
| GM626  | 1.7937093  |
| GM6328 | 1.4520869  |
| GM6377 | 4.0831184  |
| GM6403 | 2.8250728  |
| GM6404 | 1.1287518  |
| GM6498 | 1.9572959  |
| GM6524 | 2.2379193  |

|        |            |
|--------|------------|
| GM6525 | 1.1313481  |
| GM6548 | 1.7533822  |
| GM6570 | 1.3014159  |
| GM6578 | 1.6674514  |
| GM6579 | 1.2356901  |
| GM6607 | 1.3677082  |
| GM6904 | 1.066916   |
| GM6994 | 1.8599138  |
| GM7111 | 2.416956   |
| GM7241 | 1.0786483  |
| GM7265 | 1.761251   |
| GM7337 | 2.213358   |
| GM7555 | 1.2078252  |
| GM7634 | 0.86778307 |
| GM7664 | 1.2136688  |
| GM7696 | 0.8641927  |
| GM7967 | 2.1761556  |
| GM807  | 1.2365477  |
| GM8154 | 0.6902211  |
| GM8221 | 1.5856781  |
| GM831  | 0.6650646  |
| GM8526 | 0.84950924 |
| GM8580 | 1.8169222  |
| GM8709 | 2.6300893  |
| GM8801 | 2.53997    |
| GM8884 | 1.4312348  |
| GM8909 | 3.0455484  |
| GM8994 | 2.2886138  |
| GM8995 | 2.3709316  |
| GM9049 | 1.2231598  |
| GM9079 | 2.132545   |
| GM9178 | 2.4174066  |
| GM9234 | 1.3529735  |
| GM9385 | 1.6890302  |
| GM9456 | 1.4949007  |
| GM9457 | 1.7292914  |
| GM9693 | 1.2259817  |
| GM9706 | 3.4926805  |
| GM9920 | 1.2771139  |
| GMCL1  | 1.3432536  |
| GMDS   | 0.88866806 |
| GMEB1  | 1.2468414  |
| GMEB2  | 1.3109322  |
| GMIP   | 1.7642121  |
| GMPR2  | 1.4456892  |

|          |           |
|----------|-----------|
| GNA13    | 2.012714  |
| GNAI3    | 2.2862563 |
| GNAS     | 1.2866106 |
| GNB2     | 1.9671655 |
| GNB2L1   | 1.6143618 |
| GNG12    | 2.3616843 |
| GNG5     | 1.7071576 |
| GNL2     | 2.4232535 |
| GNL3     | 3.255774  |
| GNPAT    | 1.3540516 |
| GNPDA1   | 0.8125529 |
| GNPTG    | 1.2951441 |
| GNS      | 1.3697095 |
| GOLGA1   | 1.9110055 |
| GOLGA3   | 2.5200744 |
| GOLGA4   | 2.0541635 |
| GOLGA7   | 1.411521  |
| GOLGB1   | 2.3746758 |
| GOLPH3   | 2.548564  |
| GOLPH3L  | 1.0804706 |
| GOLT1B   | 1.4896898 |
| GOPC     | 1.3269529 |
| GORAB    | 1.5469372 |
| GOSR1    | 1.8052282 |
| GOSR2    | 1.6951246 |
| GP49A    | 3.274694  |
| GPAA1    | 1.1720848 |
| GPATCH11 | 1.4976006 |
| GPATCH2L | 1.6501384 |
| GPBP1    | 1.4755454 |
| GPBP1L1  | 0.8472433 |
| GPI1     | 1.919826  |
| GPKOW    | 1.6684704 |
| GPN1     | 1.0939646 |
| GPN3     | 0.9721513 |
| GPR107   | 1.659585  |
| GPR108   | 1.1664085 |
| GPR137   | 1.6542039 |
| GPR146   | 2.3501506 |
| GPR18    | 2.7051969 |
| GPR3     | 1.0963678 |
| GPR31B   | 1.2007608 |
| GPR65    | 2.0676837 |
| GPR84    | 5.7860346 |
| GPR85    | 2.6871245 |

|             |            |
|-------------|------------|
| GPRIN1      | 0.870738   |
| GPS1        | 1.9137316  |
| GPS2        | 1.2542157  |
| GRAMD1A     | 2.8335152  |
| GRB2        | 0.96100616 |
| GRB7        | 1.6372461  |
| GRCC10      | 0.74753    |
| GRINA       | 2.7503843  |
| GRIPAP1     | 2.7215471  |
| GRSF1       | 1.7950583  |
| GRWD1       | 2.3694754  |
| GSDMD       | 2.7537422  |
| GSK3A       | 2.219038   |
| GSKIP       | 1.3677487  |
| GSPT1       | 2.3302479  |
| GSR         | 2.314609   |
| GSTO1       | 1.2275691  |
| GSTT3       | 2.8978782  |
| GSX1        | 0.7460377  |
| GT(ROSA)269 | 1.3477907  |
| GTDC1       | 1.2649384  |
| GTF2A1      | 1.3077459  |
| GTF2B       | 2.363268   |
| GTF2E2      | 1.0300574  |
| GTF2F1      | 2.0294604  |
| GTF2F2      | 1.9421024  |
| GTF2H1      | 1.7801614  |
| GTF2H2      | 1.0319633  |
| GTF2H3      | 1.8590674  |
| GTF2H4      | 1.4342642  |
| GTF2IRD2    | 1.4204645  |
| GTF3C1      | 0.8938241  |
| GTF3C2      | 1.3798261  |
| GTF3C4      | 1.3691072  |
| GTF3C5      | 1.5772214  |
| GTF3C6      | 2.0154805  |
| GTPBP1      | 0.7652044  |
| GTPBP2      | 1.0505052  |
| GTPBP4      | 1.7109075  |
| GTPBP6      | 1.738195   |
| GUSB        | 0.8442774  |
| GYK         | 3.056273   |
| GZF1        | 1.8235769  |
| GZMB        | 2.910102   |
| H13         | 2.3526711  |

|          |            |
|----------|------------|
| H2-AA    | 1.5925322  |
| H2-AB1   | 1.0541954  |
| H2AFX    | 1.5899367  |
| H2AFY    | 1.091084   |
| H2AFZ    | 0.9652505  |
| H2-D1    | 1.4035072  |
| H2-EA-PS | 1.559763   |
| H2-EB1   | 0.90928745 |
| H2-K1    | 1.8576622  |
| H2-K2    | 1.9641294  |
| H2-KE2   | 1.5789676  |
| H2-M2    | 1.654685   |
| H2-Q2    | 2.0738263  |
| H2-Q4    | 2.526847   |
| H2-Q5    | 2.3224359  |
| H2-Q7    | 1.9920216  |
| H2-Q8    | 1.8150468  |
| H2-T10   | 1.7225523  |
| H2-T23   | 1.8448248  |
| H2-T9    | 1.1233215  |
| H3F3B    | 2.5726595  |
| H60A     | 2.5973034  |
| H60B     | 1.9284055  |
| HARS     | 2.50062    |
| HAT1     | 1.3748846  |
| HAUS2    | 1.0088241  |
| HAUS3    | 1.5352736  |
| HAUS8    | 1.6013422  |
| HAX1     | 2.6646137  |
| HBA-A2   | 1.283575   |
| HBP1     | 1.9130583  |
| HCAR2    | 2.5380425  |
| HCCS     | 1.4272633  |
| HCFC1    | 0.9776306  |
| HCFC1R1  | 1.0726881  |
| HCK      | 1.7694583  |
| HCLS1    | 2.0141177  |
| HDAC10   | 0.95002174 |
| HDAC3    | 1.0971951  |
| HDAC4    | 1.2667432  |
| HDAC5    | 0.8692951  |
| HDC      | 2.522862   |
| HDGF     | 1.3787656  |
| HDGFRP2  | 1.5044713  |
| HEATR1   | 2.7021441  |

|           |            |
|-----------|------------|
| HEATR2    | 1.1390419  |
| HEATR3    | 1.871573   |
| HEATR5A   | 0.85088205 |
| HEATR5B   | 0.732954   |
| HECTD1    | 2.171967   |
| HECTD3    | 1.309423   |
| HECW1     | 1.8793254  |
| HELZ      | 1.7430577  |
| HELZ2     | 3.3516521  |
| HEMGN     | 1.9333463  |
| HERC1     | 1.1715894  |
| HERC2     | 1.4084778  |
| HERC4     | 1.5908351  |
| HERC6     | 2.1918602  |
| HERPUD1   | 3.2976418  |
| HERPUD2   | 1.9352899  |
| HEXA      | 0.9231248  |
| HEXB      | 1.5222712  |
| HGF       | 1.1155953  |
| HGS       | 2.0537486  |
| HIAT1     | 1.5751343  |
| HIATL1    | 1.8333149  |
| HIF1A     | 3.3767061  |
| HIF1AN    | 1.480526   |
| HIGD2A    | 1.7132211  |
| HIPK3     | 1.6636424  |
| HIRIP3    | 0.8970542  |
| HIST1H3D  | 1.8104281  |
| HIST1H4C  | 0.9804859  |
| HIST2H2BB | 0.8430171  |
| HIST2H3C2 | 1.7211118  |
| HIVEP1    | 1.7130432  |
| HIVEP2    | 1.6576695  |
| HK1       | 1.5154066  |
| HK2       | 2.5627265  |
| HK3       | 1.4955654  |
| HLTF      | 1.1253934  |
| HMCES     | 1.1290183  |
| HMG20B    | 1.1276841  |
| HMGA1     | 1.8586717  |
| HMGB1     | 0.9308386  |
| HMGN5     | 1.3398428  |
| HMGXB3    | 1.6932654  |
| HMMR      | 1.3691244  |
| HMOX2     | 1.6269975  |

|           |            |
|-----------|------------|
| HNRNPA0   | 1.0816283  |
| HNRNPA2B1 | 2.5864105  |
| HNRNPA3   | 1.4821215  |
| HNRNPAB   | 1.8145504  |
| HNRNPC    | 1.8172321  |
| HNRNPD    | 1.3186097  |
| HNRNPF    | 1.6895113  |
| HNRNPH1   | 1.4217868  |
| HNRNPH2   | 1.9559045  |
| HNRNPH3   | 1.4103382  |
| HNRNPK    | 1.9233365  |
| HNRNPLL   | 1.0891142  |
| HNRNPM    | 2.003264   |
| HNRNPR    | 0.87045527 |
| HNRNPUL1  | 0.9687495  |
| HNRNPUL2  | 1.5898013  |
| HOMER2    | 0.8544285  |
| HOOK2     | 1.4639626  |
| HOOK3     | 1.8452153  |
| HP        | 2.7476292  |
| HP1BP3    | 0.9011617  |
| HPRT      | 1.1583877  |
| HPS3      | 1.4018373  |
| HPS4      | 1.3401465  |
| HPSE      | 0.8071718  |
| HRAS      | 0.8324318  |
| HSBP1     | 1.3975296  |
| HSD17B11  | 1.4040236  |
| HSD3B2    | 2.069282   |
| HSF1      | 1.9964018  |
| HSF2      | 1.2523499  |
| HSF5      | 1.7595968  |
| HSP90AA1  | 1.747529   |
| HSP90AB1  | 1.5677366  |
| HSPA14    | 1.452712   |
| HSPA1A    | 3.709042   |
| HSPA2     | 1.3318233  |
| HSPA4     | 2.062583   |
| HSPA5     | 2.98735    |
| HSPA8     | 2.1307163  |
| HSPB11    | 1.0502348  |
| HSPBP1    | 1.8261929  |
| HSPH1     | 3.2196064  |
| HTATSF1   | 0.7969723  |
| HTRA2     | 1.0402493  |

|         |            |
|---------|------------|
| HTRA4   | 1.461381   |
| HTT     | 1.6964092  |
| HUS1    | 1.3030298  |
| HUWE1   | 1.7011328  |
| IARS    | 2.385909   |
| ICAM1   | 2.3301744  |
| ICMT    | 1.2084866  |
| ICOSL   | 2.2200704  |
| ID2     | 2.360001   |
| ID3     | 1.6769371  |
| IDH3A   | 1.0644155  |
| IDH3G   | 1.3932056  |
| IDNK    | 2.1151972  |
| IDUA    | 1.3370175  |
| IER2    | 1.4854927  |
| IER3    | 2.3414578  |
| IER3IP1 | 1.5064402  |
| IFFO2   | 2.0307288  |
| IFI202B | 3.1873484  |
| IFI203  | 1.2480388  |
| IFI204  | 2.7621908  |
| IFI35   | 1.9543638  |
| IFI44   | 1.6064596  |
| IFI44L  | 1.2457197  |
| IFI47   | 3.5207834  |
| IFIH1   | 1.9949088  |
| IFIT1   | 3.2574096  |
| IFIT2   | 2.0096889  |
| IFIT3   | 1.4505167  |
| IFITM1  | 2.4811344  |
| IFITM2  | 3.1274877  |
| IFITM3  | 2.6810317  |
| IFITM5  | 1.6178594  |
| IFITM6  | 3.605041   |
| IFITM7  | 2.0854464  |
| IFNAR1  | 2.0860157  |
| IFNAR2  | 2.5267382  |
| IFNG    | 2.190075   |
| IFNGR2  | 2.046061   |
| IFRD1   | 2.659504   |
| IFRD2   | 2.184914   |
| IFT46   | 0.74468994 |
| IFT52   | 1.4338274  |
| IFT57   | 1.311408   |
| IFT80   | 1.1213112  |



|         |            |
|---------|------------|
| IFT88   | 0.8862996  |
| IGBP1   | 1.1268435  |
| IGF2BP2 | 1.5958853  |
| IGF2R   | 0.7665129  |
| IGSF6   | 2.707543   |
| IGSF8   | 2.2757955  |
| IGSF9   | 1.856524   |
| IGTP    | 2.9437995  |
| IIGP1   | 3.3827     |
| IK      | 2.1087165  |
| IKBKB   | 1.7780247  |
| IKBKE   | 4.272011   |
| IKZF1   | 1.6538842  |
| IKZF4   | 1.3338332  |
| IKZF5   | 1.7049618  |
| IL12RB1 | 1.02268    |
| IL13RA1 | 2.6315513  |
| IL17RC  | 1.2638149  |
| IL18BP  | 3.00635    |
| IL1B    | 4.750852   |
| IL1F6   | 3.712277   |
| IL1F9   | 4.2408366  |
| IL1R2   | 6.290367   |
| IL21    | 1.4870377  |
| IL23A   | 1.1487255  |
| IL27RA  | 1.7325716  |
| IL2RG   | 2.5160537  |
| IL4I1   | 2.3360796  |
| IL6     | 7.8417587  |
| IL6RA   | 1.0874205  |
| IL6ST   | 2.1672359  |
| ILF3    | 1.622477   |
| ILK     | 1.3527327  |
| ILKAP   | 1.3799205  |
| ILVBL   | 1.493474   |
| IMMP1L  | 1.4178367  |
| IMMT    | 2.2153144  |
| IMP3    | 1.6511784  |
| IMP4    | 2.3748136  |
| IMPA1   | 1.445373   |
| IMPAD1  | 1.5091543  |
| IMPDH2  | 1.6193781  |
| IMPG2   | 1.8878474  |
| INF2    | 1.0965567  |
| ING2    | 0.91112494 |

|         |            |
|---------|------------|
| ING3    | 0.9494915  |
| ING5    | 1.3215127  |
| INHBA   | 3.5618544  |
| INHBB   | 4.62226    |
| INO80C  | 2.3708823  |
| INO80D  | 1.5002136  |
| INPP1   | 1.3654408  |
| INPP4A  | 1.1692762  |
| INPP5B  | 0.95715904 |
| INPPL1  | 0.89787483 |
| INTS12  | 2.1066322  |
| INTS8   | 2.0413485  |
| IP6K1   | 1.5302038  |
| IPO11   | 1.2007728  |
| IPO5    | 1.34026    |
| IPO7    | 1.3182163  |
| IPO8    | 1.4744902  |
| IPO9    | 1.19238    |
| IQCG    | 0.97483826 |
| IRAK1   | 0.77092505 |
| IRAK2   | 1.3855486  |
| IRAK3   | 4.8203144  |
| IRAK4   | 1.4310675  |
| IRF1    | 2.5525017  |
| IRF2    | 2.037602   |
| IRF2BP1 | 1.2567468  |
| IRF2BP2 | 1.8041697  |
| IRF3    | 2.042357   |
| IRF7    | 1.5674634  |
| IRF8    | 2.453969   |
| IRF9    | 1.5840411  |
| IRG1    | 4.952163   |
| IRGM1   | 3.1432428  |
| IRGM2   | 2.6652393  |
| IRS2    | 3.3530865  |
| ISCA1   | 1.4092193  |
| ISCA2   | 1.6228938  |
| ISCU    | 1.7732148  |
| ISG15   | 3.6198869  |
| ISG20   | 1.9992671  |
| ISG20L2 | 1.4534659  |
| IST1    | 2.1952786  |
| ISY1    | 1.5835977  |
| ISYNA1  | 1.4984136  |
| ITCH    | 1.2820272  |

|          |            |
|----------|------------|
| ITFG3    | 1.9195676  |
| ITGA10   | 1.1954389  |
| ITGA5    | 1.7111802  |
| ITGAL    | 2.1679153  |
| ITGAM    | 1.5407295  |
| ITGB1BP1 | 1.6223669  |
| ITGB3    | 1.4716687  |
| ITK      | 1.8608255  |
| ITM2B    | 1.083631   |
| ITM2C    | 1.0146456  |
| ITPK1    | 0.6198559  |
| ITPR1    | 1.2303104  |
| ITPR2    | 0.9265852  |
| ITSN1    | 1.6671362  |
| ITSN2    | 0.9920244  |
| IVNS1ABP | 1.2786727  |
| IWS1     | 0.92789555 |
| JAGN1    | 1.9276791  |
| JAK1     | 2.0870843  |
| JAK2     | 1.4055395  |
| JAK3     | 2.3706732  |
| JDP2     | 1.8417563  |
| JKAMP    | 1.2831626  |
| JMJD1C   | 2.4562497  |
| JMJD8    | 1.214524   |
| JPX      | 1.9058347  |
| JTB      | 1.7718511  |
| JUN      | 1.8008885  |
| JUNB     | 2.694684   |
| JUND     | 1.8536487  |
| KANK1    | 0.97379494 |
| KANSL3   | 1.4750037  |
| KARS     | 2.4056382  |
| KAT2A    | 1.0646248  |
| KAT2B    | 1.05723    |
| KAT5     | 0.82273436 |
| KAT7     | 1.6781039  |
| KAT8     | 2.3419423  |
| KATNA1   | 2.3277998  |
| KATNAL1  | 1.0770807  |
| KATNBL1  | 1.3262491  |
| KBTBD2   | 1.2587657  |
| KBTBD4   | 1.9666276  |
| KBTBD7   | 1.8291175  |
| KCMF1    | 1.8758254  |

|          |            |
|----------|------------|
| KCNA4    | 1.8068929  |
| KCNH3    | 0.85011196 |
| KCNJ8    | 2.332287   |
| KCNQ1OT1 | 1.468575   |
| KCTD14   | 1.6511965  |
| KCTD20   | 2.0762138  |
| KCTD21   | 1.3165071  |
| KCTD5    | 1.6265726  |
| KCTD6    | 1.6690335  |
| KCTD9    | 1.4651985  |
| KDM1A    | 0.947165   |
| KDM2B    | 0.8057537  |
| KDM3A    | 0.90202713 |
| KDM4B    | 1.3336601  |
| KDM4C    | 1.025897   |
| KDM5A    | 1.1328349  |
| KDM5B    | 0.9839859  |
| KDM5C    | 1.7936015  |
| KDM6A    | 1.8796449  |
| KDM6B    | 1.9438872  |
| KHDC3    | 1.1952264  |
| KHDRBS1  | 1.2048464  |
| KHDRBS3  | 1.611392   |
| KHNYN    | 1.306541   |
| KHSRP    | 1.1327581  |
| KIF1B    | 0.88660526 |
| KIN      | 0.7034254  |
| KIZ      | 1.0950327  |
| KLC2     | 0.8399081  |
| KLF10    | 1.7695847  |
| KLF15    | 2.3272686  |
| KLF3     | 1.4868197  |
| KLHDC10  | 2.091301   |
| KLHDC2   | 1.6940107  |
| KLHDC3   | 2.1092215  |
| KLHDC4   | 1.565505   |
| KLHL15   | 1.856966   |
| KLHL18   | 1.230906   |
| KLHL2    | 2.2157068  |
| KLHL20   | 1.1581554  |
| KLHL21   | 2.0349069  |
| KLHL24   | 0.7110305  |
| KLHL25   | 1.6424932  |
| KLHL28   | 1.3530564  |
| KLHL7    | 1.1854312  |

|          |            |
|----------|------------|
| KLHL9    | 1.3230014  |
| KLRA1    | 2.1455522  |
| KLRA2    | 3.7388306  |
| KMT2B    | 1.3850284  |
| KMT2C    | 1.1629443  |
| KPNA1    | 1.6457806  |
| KPNA2    | 1.7111878  |
| KPNA3    | 2.091259   |
| KPNA4    | 0.96774054 |
| KPNA6    | 0.7753172  |
| KPNB1    | 1.3295522  |
| KPTN     | 1.1702943  |
| KRAS     | 1.0000458  |
| KRCC1    | 1.9572797  |
| KRI1     | 1.8887634  |
| KRIT1    | 1.7288389  |
| KRR1     | 1.7467074  |
| KRT16    | 1.1101618  |
| KRT17    | 1.2646081  |
| KRTAP3-3 | 0.84054637 |
| KRTAP4-8 | 1.5240536  |
| KXD1     | 1.0498857  |
| L7RN6    | 1.4099598  |
| LACC1    | 3.6902068  |
| LAMP2    | 1.9488072  |
| LAMTOR1  | 1.3376231  |
| LAMTOR3  | 1.1280088  |
| LAMTOR4  | 1.423614   |
| LAMTOR5  | 1.1563091  |
| LANCL1   | 0.94757605 |
| LAP3     | 2.7852287  |
| LAPTM4A  | 1.2580624  |
| LARP1    | 2.2678914  |
| LARP4    | 2.0148282  |
| LARP4B   | 1.6426477  |
| LARP7    | 1.4401813  |
| LARS2    | 1.8790483  |
| LCN2     | 5.112878   |
| LCP1     | 2.4216013  |
| LCP2     | 2.116747   |
| LDHA     | 2.9198866  |
| LDLR     | 1.432353   |
| LDLRAD3  | 2.1329904  |
| LEFTY2   | 0.7522564  |
| LEMD2    | 1.1229715  |

|             |            |
|-------------|------------|
| LENEP       | 1.8497062  |
| LENG8       | 0.8580797  |
| LENG9       | 1.5471869  |
| LEPROT      | 0.77959585 |
| LEPROTL1    | 1.0324788  |
| LETM1       | 1.46276    |
| LETMD1      | 0.7206359  |
| LGALS3BP    | 1.9049282  |
| LGALSL      | 1.1759806  |
| LHFPL2      | 0.69008994 |
| LILRA5      | 0.9108739  |
| LILRA6      | 2.6668773  |
| LILRB4      | 3.2495298  |
| LIMD1       | 1.1265254  |
| LIN28A      | 1.3795574  |
| LIN37       | 1.4300594  |
| LIN52       | 0.9305887  |
| LIN7C       | 0.81543136 |
| LITAF       | 3.7321382  |
| LLGL2       | 0.8108144  |
| LLPH        | 1.582355   |
| LMAN2L      | 1.4161844  |
| LMBRD1      | 0.88436127 |
| LMO4        | 1.1206036  |
| LMTK2       | 1.404974   |
| LNX2        | 1.4428787  |
| LOC1008617: | 2.1846828  |
| LOC1008617: | 1.343462   |
| LOC1010557: | 1.5115275  |
| LOC1010558: | 1.3108959  |
| LOC1010558: | 1.5114279  |
| LOC1010558: | 0.8448105  |
| LOC1010559: | 1.3929567  |
| LOC1010560: | 1.3592076  |
| LOC1026319: | 1.4816275  |
| LOC1026322: | 1.4243197  |
| LOC1026324: | 1.2672272  |
| LOC1026327: | 1.8197098  |
| LOC1026332: | 2.0072474  |
| LOC1026335: | 1.8503528  |
| LOC1026338: | 1.3337915  |
| LOC1026341: | 2.9121547  |
| LOC1026347: | 0.9212222  |
| LOC1026350: | 1.7731729  |
| LOC1026362: | 1.244894   |

|            |            |
|------------|------------|
| LOC1026371 | 2.0536652  |
| LOC1026377 | 2.0803466  |
| LOC1026381 | 2.7160258  |
| LOC1026385 | 1.8423076  |
| LOC1026388 | 1.2881994  |
| LOC1026390 | 1.452152   |
| LOC1026399 | 1.4003048  |
| LOC1026399 | 1.0867233  |
| LOC1026402 | 1.1357508  |
| LOC1026410 | 1.9458675  |
| LOC1026410 | 0.89334726 |
| LOC1026410 | 0.7909751  |
| LOC1026410 | 1.9409521  |
| LOC1026413 | 1.1621389  |
| LOC1026413 | 2.0836754  |
| LOC1026413 | 0.9577236  |
| LOC1026413 | 2.2543755  |
| LOC1026414 | 1.2208433  |
| LOC1026415 | 1.0512743  |
| LOC1026416 | 1.3975978  |
| LOC1026416 | 2.3009963  |
| LOC1026419 | 1.1910062  |
| LOC1026422 | 1.1686926  |
| LOC1026423 | 1.6576152  |
| LOC1026424 | 1.0902658  |
| LOC1026424 | 0.77796173 |
| LOC1026424 | 1.5492415  |
| LOC1026425 | 1.1014414  |
| LOC1026426 | 0.7137165  |
| LOC1026426 | 1.0116391  |
| LOC1026427 | 0.9573536  |
| LOC1026428 | 0.92319155 |
| LOC1026430 | 1.870275   |
| LOC1026431 | 2.0556073  |
| LOC1026432 | 0.8944473  |
| LOC547349  | 1.8343039  |
| LOC674896  | 1.5450883  |
| LOH12CR1   | 0.82383394 |
| LPAR1      | 1.537019   |
| LPCAT2     | 1.6791773  |
| LPCAT3     | 0.9994745  |
| LPIN3      | 1.1702456  |
| LPL        | 0.7699928  |
| LPP        | 1.3218284  |
| LRBA       | 0.637218   |

|        |            |
|--------|------------|
| LRG1   | 5.286798   |
| LRIF1  | 2.053043   |
| LRIG3  | 1.26929    |
| LRP10  | 1.5085597  |
| LRR14  | 1.1830637  |
| LRR25  | 2.469903   |
| LRR31  | 1.4324698  |
| LRR38  | 1.8520138  |
| LRR40  | 2.3225904  |
| LRR41  | 2.2798247  |
| LRR47  | 1.8763599  |
| LRR58  | 1.6382728  |
| LRR8A  | 2.6270714  |
| LRR8C  | 1.8853178  |
| LRR8D  | 0.94697905 |
| LRWD1  | 0.9035344  |
| LSG1   | 2.138278   |
| LSM1   | 1.9562454  |
| LSM10  | 0.9722266  |
| LSM11  | 0.9909446  |
| LSM12  | 1.7665553  |
| LSM14A | 1.4986043  |
| LSM2   | 1.7356577  |
| LSM4   | 1.8174553  |
| LSM5   | 1.430913   |
| LSM6   | 1.5868845  |
| LSM7   | 1.2295332  |
| LSM8   | 1.0416722  |
| LST1   | 1.1989121  |
| LTA4H  | 0.8505106  |
| LTB    | 1.9147286  |
| LTB4R2 | 1.1173186  |
| LTBR   | 1.7051969  |
| LTF    | 3.6871939  |
| LTN1   | 1.6443019  |
| LUC7L  | 2.60323    |
| LUC7L2 | 1.6765451  |
| LUC7L3 | 1.132165   |
| LY6E   | 1.3763967  |
| LY6G   | 2.7969437  |
| LYN    | 2.408308   |
| LYPD5  | 1.1209381  |
| LYPLA2 | 1.5535808  |
| LYRM1  | 1.3320754  |
| LYRM4  | 0.99672556 |



|           |            |
|-----------|------------|
| LZIC      | 2.1697922  |
| LZTFL1    | 2.0296068  |
| LZTS3     | 1.0957975  |
| M6PR      | 1.6801586  |
| MAD1L1    | 1.379468   |
| MAD2L1BP  | 1.1446209  |
| MAD2L2    | 1.7992592  |
| MADD      | 1.6855288  |
| MAEA      | 1.4868212  |
| MAF       | 1.027101   |
| MAFB      | 0.89988947 |
| MAFF      | 4.0016985  |
| MAFG      | 2.0739207  |
| MAFK      | 2.2674894  |
| MAGOH     | 1.762999   |
| MAGOHB    | 2.3541617  |
| MALT1     | 2.6235409  |
| MAML1     | 1.6254463  |
| MAN1A2    | 0.73581505 |
| MAN1B1    | 1.5584173  |
| MAN2A1    | 2.350655   |
| MAN2B1    | 1.13134    |
| MAN2C1    | 1.4695477  |
| MANBA     | 0.9932027  |
| MAP1LC3B  | 2.331873   |
| MAP1S     | 0.92446566 |
| MAP2K1    | 2.3460078  |
| MAP2K3    | 1.9981256  |
| MAP2K5    | 0.8383894  |
| MAP3K1    | 1.5065665  |
| MAP3K11   | 1.1982813  |
| MAP3K15   | 1.0168526  |
| MAP3K5    | 1.4613299  |
| MAP3K7    | 1.6863675  |
| MAP3K8    | 3.7303     |
| MAP4K5    | 0.8310032  |
| MAP6D1    | 1.168426   |
| MAP7      | 1.8248234  |
| MAP7D1    | 1.1939144  |
| MAPK1     | 1.4874477  |
| MAPK14    | 1.3038864  |
| MAPK1IP1  | 1.5592499  |
| MAPK1IP1L | 1.4637756  |
| MAPK6     | 1.3771172  |
| MAPK7     | 1.0843081  |

|          |            |
|----------|------------|
| MAPK8IP3 | 1.5448899  |
| MAPK9    | 0.9723015  |
| MAPKAPK2 | 2.6668997  |
| MAPKAPK5 | 1.8179908  |
| MAPRE1   | 1.0652752  |
| MAPRE3   | 1.3674822  |
| MARCKS   | 1.6384606  |
| MARCKSL1 | 5.120109   |
| MARF1    | 0.6998229  |
| MARK1    | 1.4176455  |
| MARK2    | 0.8720882  |
| MARK3    | 1.1916833  |
| MARK4    | 1.5678463  |
| MARS2    | 1.3818638  |
| MAST2    | 1.4047241  |
| MAT2A    | 1.8703752  |
| MAT2B    | 0.80512476 |
| MATR3    | 1.7093921  |
| MAX      | 1.4776206  |
| MBD1     | 4.291724   |
| MBD2     | 1.6637526  |
| MBD3     | 1.0608058  |
| MBD6     | 1.3877068  |
| MBNL2    | 0.8107166  |
| MBOAT7   | 2.0037537  |
| MBTD1    | 1.147006   |
| MBTPS1   | 1.830761   |
| MC2R     | 0.89416623 |
| MCAM     | 1.6451054  |
| MCCC1OS  | 1.173192   |
| MCL1     | 1.527627   |
| MCM10    | 1.2698007  |
| MCM3AP   | 1.3401518  |
| MCM7     | 1.1974249  |
| MCMBP    | 1.4229093  |
| MCOLN1   | 1.3778787  |
| MCTP2    | 3.3721595  |
| MCTS1    | 1.470479   |
| MDC1     | 1.1004109  |
| MDFIC    | 0.80940056 |
| MDH2     | 1.9232879  |
| MDM2     | 1.5460672  |
| MDM4     | 0.9212129  |
| MDN1     | 2.2588456  |
| MEA1     | 1.7876263  |

|          |            |
|----------|------------|
| MEAF6    | 0.9397354  |
| MED1     | 1.7565312  |
| MED10    | 1.3463092  |
| MED11    | 1.2487507  |
| MED12    | 1.2346883  |
| MED15    | 1.4944081  |
| MED16    | 1.7520552  |
| MED17    | 1.6788826  |
| MED20    | 1.7807069  |
| MED24    | 1.3210859  |
| MED26    | 1.5971866  |
| MED27    | 1.6544981  |
| MED28    | 1.1360426  |
| MED31    | 1.5716963  |
| MED4     | 1.6141996  |
| MED6     | 1.2170467  |
| MED7     | 2.211484   |
| MED8     | 1.9500599  |
| MED9     | 1.6743689  |
| MEDAG    | 1.4320726  |
| MEF2A    | 1.8628626  |
| MEFV     | 4.6734195  |
| MEMO1    | 1.1846871  |
| MEN1     | 0.7344513  |
| MEPCE    | 1.1929078  |
| MERTK    | 1.1326184  |
| MESDC2   | 1.4425144  |
| METAP2   | 1.8996558  |
| METRNL   | 1.4871521  |
| METTLL14 | 1.3163757  |
| METTLL15 | 0.78915644 |
| METTLL16 | 1.4511008  |
| METTLL20 | 1.427845   |
| METTLL23 | 0.82795525 |
| METTLL3  | 1.6555438  |
| METTLL6  | 1.4955816  |
| METTLL9  | 1.8896365  |
| MEX3C    | 1.0958123  |
| MFAP3    | 1.398561   |
| MFF      | 1.2760587  |
| MFN1     | 1.9042277  |
| MFN2     | 1.3187046  |
| MFSD1    | 1.1953211  |
| MFSD5    | 1.4899406  |
| MFSD7B   | 1.7902699  |

|         |            |
|---------|------------|
| MFSD8   | 0.9550531  |
| MGA     | 1.6935892  |
| MGAT1   | 1.2363253  |
| MGAT2   | 2.3565617  |
| MGAT4A  | 1.5707941  |
| MGEA5   | 1.2678742  |
| MGRN1   | 1.3744202  |
| MIB1    | 1.4758596  |
| MIB2    | 0.9575925  |
| MICALL1 | 1.3226323  |
| MICALL2 | 0.98478365 |
| MICU1   | 0.9685817  |
| MICU2   | 1.2135568  |
| MIDN    | 1.6173711  |
| MIEN1   | 2.3577132  |
| MIER2   | 1.5306959  |
| MIER3   | 1.56358    |
| MIF4GD  | 1.2272878  |
| MILR1   | 1.7297516  |
| MINA    | 1.8629241  |
| MINK1   | 1.3416853  |
| MINOS1  | 0.73399734 |
| MINPP1  | 1.6416149  |
| MIOS    | 1.0695438  |
| MIR17HG | 2.2742405  |
| MIR22HG | 1.259592   |
| MIS12   | 2.1965094  |
| MITD1   | 1.8889441  |
| MKI67   | 1.0631747  |
| MKKS    | 1.8252692  |
| MKLN1   | 1.7286305  |
| MKNK2   | 0.9488478  |
| MKX     | 1.6407337  |
| MLEC    | 2.0323062  |
| MLF2    | 1.6181669  |
| MLLT1   | 1.1154895  |
| MLLT4   | 0.97680235 |
| MLLT6   | 2.2990985  |
| MLST8   | 0.7252183  |
| MLX     | 2.555457   |
| MMAA    | 1.5320096  |
| MMP8    | 4.7812777  |
| MMP9    | 2.8503413  |
| MMS22L  | 2.1291828  |
| MNDA    | 2.6139073  |

|          |            |
|----------|------------|
| MNDAL    | 1.4299326  |
| MOAP1    | 1.457401   |
| MOB1A    | 1.1432648  |
| MOB2     | 0.99846363 |
| MOB3C    | 1.8120358  |
| MOB4     | 1.4373088  |
| MOCS1    | 2.868382   |
| MOCS3    | 2.3715954  |
| MON1A    | 2.5909767  |
| MON1B    | 1.6432238  |
| MON2     | 1.3759103  |
| MORC2A   | 1.2390904  |
| MORC3    | 1.9214382  |
| MORF4L1  | 1.6605415  |
| MOSPD1   | 0.89002657 |
| MOSPD2   | 1.2416697  |
| MOV10    | 1.7453327  |
| MPHOSPH6 | 0.90888214 |
| MPHOSPH8 | 1.4217782  |
| MPLKIP   | 0.74990606 |
| MPO      | 1.1778038  |
| MPST     | 1.5504041  |
| MPZL2    | 2.2817202  |
| MRE11A   | 1.1280861  |
| MRFAP1   | 1.4132495  |
| MRGBP    | 1.3181334  |
| MRGPRA2A | 3.6174808  |
| MRGPRA2B | 3.5557246  |
| MRGPRA6  | 5.654917   |
| MRM1     | 0.8904457  |
| MRPL11   | 1.6780801  |
| MRPL14   | 1.3306336  |
| MRPL15   | 2.4536972  |
| MRPL19   | 1.7268262  |
| MRPL20   | 1.900949   |
| MRPL21   | 1.850637   |
| MRPL23   | 1.5370688  |
| MRPL3    | 1.5297203  |
| MRPL32   | 1.4165368  |
| MRPL33   | 0.9832511  |
| MRPL34   | 1.5832014  |
| MRPL37   | 2.4948215  |
| MRPL39   | 2.1945758  |
| MRPL4    | 2.1062999  |
| MRPL40   | 1.6743698  |

|         |            |
|---------|------------|
| MRPL41  | 2.0344653  |
| MRPL42  | 1.3423805  |
| MRPL43  | 1.8876314  |
| MRPL45  | 2.0100055  |
| MRPL48  | 1.3113346  |
| MRPL49  | 0.96501255 |
| MRPL52  | 2.4315877  |
| MRPL53  | 1.916286   |
| MRPL9   | 2.0229983  |
| MRPS10  | 1.6986761  |
| MRPS15  | 2.5830555  |
| MRPS16  | 1.7773232  |
| MRPS17  | 1.492302   |
| MRPS18C | 1.6019955  |
| MRPS25  | 1.1812167  |
| MRPS26  | 1.3774085  |
| MRPS33  | 1.2931714  |
| MRPS36  | 0.8837557  |
| MRPS6   | 1.990066   |
| MRPS9   | 1.5589409  |
| MRT04   | 2.1703181  |
| MS4A4A  | 3.0118604  |
| MS4A4C  | 2.147904   |
| MS4A6B  | 2.5175073  |
| MS4A6C  | 2.6493912  |
| MS4A6D  | 3.890904   |
| MS4A8A  | 2.444302   |
| MSANTD4 | 1.2943501  |
| MSH6    | 1.3479342  |
| MSL1    | 0.9528456  |
| MSL2    | 1.6188827  |
| MSL3    | 1.7828622  |
| MSR1    | 4.1515083  |
| MSRB1   | 1.7358527  |
| MT1     | 4.9117727  |
| MT2     | 5.5096626  |
| MTA2    | 1.7084365  |
| MTA3    | 1.3680129  |
| MTBP    | 1.9123926  |
| MTDH    | 1.6042724  |
| MTERF1A | 1.1377339  |
| MTERFD1 | 1.6033397  |
| MTERFD2 | 1.4820328  |
| MTF1    | 1.5049372  |
| MTF2    | 1.4137192  |

|         |           |
|---------|-----------|
| MTFMT   | 1.5055957 |
| MTFR1L  | 1.1813946 |
| MTFR2   | 1.8608537 |
| MTG2    | 2.1268973 |
| MTHFD2  | 2.4630861 |
| MTHFS   | 2.195529  |
| MTIF2   | 2.6952777 |
| MTM1    | 0.9148226 |
| MTMR10  | 0.8375015 |
| MTMR12  | 1.4318805 |
| MTMR14  | 2.4429073 |
| MTMR2   | 1.0129294 |
| MTMR3   | 1.0707712 |
| MTMR6   | 1.1123567 |
| MTPAP   | 1.8984313 |
| MTPN    | 1.8830471 |
| MTRF1L  | 1.7398429 |
| MTX1    | 1.9380965 |
| MVB12A  | 2.9911604 |
| MVP     | 2.8314667 |
| MX1     | 1.3388901 |
| MX2     | 2.8702435 |
| MXD1    | 3.7409773 |
| MYC     | 3.3810492 |
| MYCBP2  | 1.0392256 |
| MYD88   | 3.268651  |
| MYEOV2  | 1.3738117 |
| MYG1    | 1.2864814 |
| MYH9    | 1.3785095 |
| MYO1B   | 1.24722   |
| MYO1E   | 1.1842818 |
| MYO9B   | 0.9682565 |
| MYSM1   | 0.8219645 |
| N4BP2L2 | 0.74545   |
| N6AMT2  | 1.4957013 |
| NAA10   | 1.063684  |
| NAA15   | 1.5932956 |
| NAA20   | 1.0528016 |
| NAA25   | 2.706695  |
| NAA30   | 1.9284649 |
| NAA35   | 1.5419612 |
| NAA40   | 1.3366971 |
| NAA50   | 1.3523235 |
| NAA60   | 1.0033388 |
| NAB1    | 2.0772195 |

|         |            |
|---------|------------|
| NAB2    | 1.1978927  |
| NABP1   | 1.7578073  |
| NABP2   | 1.5532079  |
| NACA    | 1.2177134  |
| NACC2   | 0.75542545 |
| NADK    | 2.5656157  |
| NAE1    | 1.468061   |
| NAF1    | 1.1033874  |
| NAGK    | 1.0896797  |
| NAIP2   | 1.3266621  |
| NAIP5   | 2.4703164  |
| NAMPT   | 3.4090366  |
| NAPA    | 1.9780536  |
| NAPEPLD | 1.2573767  |
| NAPG    | 1.5043392  |
| NARFL   | 1.6970344  |
| NARS2   | 2.9971447  |
| NASP    | 1.059155   |
| NAT10   | 1.3436613  |
| NBN     | 1.3132806  |
| NCAPH2  | 0.9451046  |
| NCBP1   | 1.2431707  |
| NCF1    | 2.6594706  |
| NCF4    | 2.4495468  |
| NCKAP1  | 1.3900266  |
| NCKAP1L | 1.4277401  |
| NCL     | 2.2128634  |
| NCLN    | 1.5796537  |
| NCOA2   | 1.6795774  |
| NCOA5   | 0.96811724 |
| NCOR1   | 0.8456788  |
| NCOR2   | 1.1170931  |
| NCSTN   | 0.7559831  |
| ND6     | 1.0283899  |
| NDC1    | 1.7780259  |
| NDEL1   | 1.487628   |
| NDFIP1  | 1.3748574  |
| NDOR1   | 1.5188489  |
| NDRG1   | 2.1614943  |
| NDUFA12 | 1.9867196  |
| NDUFA3  | 1.8944688  |
| NDUFA7  | 1.7434974  |
| NDUFA9  | 2.454327   |
| NDUFAF3 | 1.0462031  |
| NDUFAF4 | 1.940568   |



|         |            |
|---------|------------|
| NDUFAF7 | 1.3673396  |
| NDUFB3  | 1.3290281  |
| NDUFB7  | 2.4304142  |
| NDUFC2  | 1.8105125  |
| NDUFS2  | 1.998188   |
| NDUFS7  | 1.7945824  |
| NECAP1  | 2.259428   |
| NECAP2  | 1.8897753  |
| NEDD1   | 1.4398403  |
| NEDD4   | 1.1554723  |
| NEDD4L  | 2.7683678  |
| NEDD8   | 1.4494591  |
| NEK7    | 1.7084422  |
| NEK9    | 1.2100377  |
| NELFA   | 1.2997341  |
| NELFB   | 1.2259159  |
| NELFCD  | 1.2852821  |
| NEMF    | 1.5780439  |
| NEURL1B | 1.8743591  |
| NEURL3  | 3.07448    |
| NF1     | 1.2170086  |
| NFE2L1  | 0.81463003 |
| NFE2L2  | 2.256784   |
| NFIL3   | 3.6538038  |
| NFKB2   | 2.8598166  |
| NFKBIA  | 3.3306222  |
| NFKBIB  | 3.4757843  |
| NFKBID  | 2.8193574  |
| NFKBIE  | 1.949698   |
| NFKBIL1 | 1.4085913  |
| NFKBIZ  | 2.066978   |
| NFRKB   | 1.3500068  |
| NFU1    | 1.6827278  |
| NFYA    | 1.7913761  |
| NFYB    | 2.2752237  |
| NFYC    | 1.2254457  |
| NGDN    | 2.4026542  |
| NGLY1   | 1.6542642  |
| NGRN    | 1.6200199  |
| NHEJ1   | 0.88370466 |
| NHP2    | 1.821661   |
| NHP2L1  | 2.6729388  |
| NIFK    | 2.1647067  |
| NINJ1   | 3.652666   |
| NIPBL   | 0.8917222  |

|         |           |
|---------|-----------|
| NISCH   | 0.8458419 |
| NKAP    | 0.9223342 |
| NKIRAS2 | 0.9661474 |
| NKRF    | 1.1431639 |
| NKTR    | 1.9859886 |
| NLRC4   | 1.9987414 |
| NLRC5   | 2.1122766 |
| NLRP3   | 2.5670958 |
| NME3    | 1.0936809 |
| NME4    | 0.7484276 |
| NME7    | 1.1462126 |
| NMI     | 1.8372397 |
| NMNAT3  | 1.2709122 |
| NMT1    | 1.7133665 |
| NOB1    | 2.037003  |
| NOC2L   | 2.1372147 |
| NOC3L   | 1.3746552 |
| NOC4L   | 2.184463  |
| NOD1    | 1.5402155 |
| NOL12   | 3.189238  |
| NOL7    | 1.3411314 |
| NOLC1   | 2.1485586 |
| NOM1    | 2.171863  |
| NOMO1   | 1.813756  |
| NONO    | 1.0135665 |
| NOP10   | 1.637125  |
| NOP14   | 2.396649  |
| NOP16   | 2.3627362 |
| NOP2    | 3.1488447 |
| NOP56   | 1.5472322 |
| NOP58   | 3.027964  |
| NOS2    | 5.0581536 |
| NOSIP   | 1.0802293 |
| NOXO1   | 0.8273082 |
| NPEPPS  | 1.881536  |
| NPL     | 2.160483  |
| NPLOC4  | 1.9535365 |
| NPM1    | 1.5397396 |
| NR1H2   | 1.3627715 |
| NR1H3   | 2.4689808 |
| NR2C1   | 0.7145004 |
| NR6A1   | 0.7967334 |
| NRAS    | 1.290597  |
| NRBF2   | 2.4969459 |
| NRBP1   | 1.4165764 |

|         |            |
|---------|------------|
| NRBP2   | 0.6346941  |
| NRIP1   | 1.8333106  |
| NRN1L   | 2.45153    |
| NRP2    | 1.0963798  |
| NSA2    | 0.9267664  |
| NSF     | 0.74750614 |
| NSMCE1  | 1.2104821  |
| NSMCE2  | 0.7983732  |
| NSMCE4A | 0.99812794 |
| NSMF    | 1.7622933  |
| NSUN2   | 2.1509118  |
| NSUN4   | 1.2989593  |
| NT5C3   | 1.5886188  |
| NTMT1   | 1.6491771  |
| NUB1    | 1.4802113  |
| NUBP2   | 1.9276443  |
| NUCB1   | 1.5025682  |
| NUCB2   | 0.78982973 |
| NUCKS1  | 1.241476   |
| NUDC    | 1.3851676  |
| NUDT21  | 1.3738475  |
| NUDT9   | 1.519825   |
| NUFIP2  | 1.7806339  |
| NUP107  | 1.2567258  |
| NUP133  | 0.905478   |
| NUP153  | 1.4232993  |
| NUP160  | 1.8577142  |
| NUP205  | 1.034226   |
| NUP35   | 1.7911129  |
| NUP43   | 1.5232911  |
| NUP50   | 2.2398815  |
| NUP54   | 2.3897743  |
| NUP62   | 1.4714527  |
| NUP85   | 1.6853342  |
| NUP88   | 1.7464232  |
| NUP98   | 1.636694   |
| NVL     | 0.97798705 |
| NXF1    | 1.7465105  |
| NXT1    | 1.8736091  |
| NXT2    | 1.1610332  |
| OARD1   | 0.72476196 |
| OAS1A   | 2.5054603  |
| OAS1B   | 1.7440786  |
| OAS1F   | 2.0146713  |
| OAS2    | 2.385254   |

|          |            |
|----------|------------|
| OAS3     | 2.4966083  |
| OASL1    | 4.393441   |
| OASL2    | 2.301032   |
| OAT      | 2.1232634  |
| OAZ1     | 1.6030684  |
| OCEL1    | 1.3209329  |
| OCIAD1   | 1.913763   |
| ODC1     | 3.0060692  |
| ODF2L    | 1.3875663  |
| OFD1     | 1.1073136  |
| OGDH     | 1.208981   |
| OGFOD1   | 1.8044825  |
| OGFOD3   | 0.9428172  |
| OGFR     | 2.2819543  |
| OGT      | 1.1578765  |
| OLA1     | 1.2850676  |
| OLFM4    | 3.9460902  |
| OLFR1229 | 0.75717974 |
| OLFR1380 | 0.8754091  |
| OLFR153  | 1.7922938  |
| OLFR611  | 1.7093604  |
| OLR1     | 1.9467528  |
| OPA3     | 1.5891209  |
| ORAI2    | 1.2962823  |
| ORAOV1   | 0.7111745  |
| ORC3     | 1.5371075  |
| ORC4     | 0.62187815 |
| ORC5     | 1.3196754  |
| ORMDL1   | 1.4705586  |
| OSBPL11  | 0.986876   |
| OSBPL3   | 1.2849565  |
| OSBPL8   | 1.1412058  |
| OSBPL9   | 1.1897097  |
| OSER1    | 1.8366055  |
| OSGEP    | 1.1363678  |
| OSMR     | 2.7534518  |
| OSTF1    | 1.1658216  |
| OTOF     | 1.0590863  |
| OTUD3    | 2.153195   |
| OTUD4    | 1.655746   |
| OTUD5    | 1.7813206  |
| OTUD6B   | 1.3393357  |
| OVCA2    | 1.2242427  |
| OVOL2    | 1.0171351  |
| OXA1L    | 1.1062083  |

|          |            |
|----------|------------|
| OXSRI    | 1.7128005  |
| P2RY13   | 3.4272776  |
| P2RY2    | 3.5884762  |
| PA2G4    | 1.7389607  |
| PABPC1   | 1.3893976  |
| PABPN1   | 1.3394685  |
| PAF1     | 1.5695829  |
| PAFAH1B1 | 1.47651    |
| PAFAH1B2 | 2.3250856  |
| PAGR1A   | 1.1087775  |
| PAICS    | 1.5004368  |
| PAIP2    | 1.1040645  |
| PAIP2B   | 1.6191759  |
| PAK1IP1  | 1.9923806  |
| PAK2     | 1.3468499  |
| PAK4     | 1.9525285  |
| PAM16    | 1.8495126  |
| PAN2     | 1.4171147  |
| PAN3     | 0.84867764 |
| PANK2    | 1.0940084  |
| PANK3    | 1.450769   |
| PANK4    | 1.6693783  |
| PAPD4    | 1.926775   |
| PAPD5    | 1.177701   |
| PAPD7    | 1.6031227  |
| PAPOLA   | 1.5525279  |
| PARD6A   | 1.109173   |
| PARG     | 1.4970598  |
| PARL     | 1.5682349  |
| PARP1    | 1.3216214  |
| PARP10   | 2.3378267  |
| PARP11   | 1.9248445  |
| PARP12   | 2.423562   |
| PARP14   | 2.9423943  |
| PARP2    | 1.7510586  |
| PARP3    | 1.8294158  |
| PARP6    | 0.7383785  |
| PARP9    | 3.1861005  |
| PATL1    | 1.7287269  |
| PAWR     | 3.0265098  |
| PAXBP1   | 1.2973485  |
| PBDC1    | 2.2887964  |
| PBRM1    | 0.6857977  |
| PCBP1    | 2.2504783  |
| PCBP2    | 1.4317989  |

|         |            |
|---------|------------|
| PCF11   | 1.2069011  |
| PCGF1   | 0.8328531  |
| PCGF3   | 1.2964303  |
| PCGF5   | 1.7456203  |
| PCID2   | 2.5740852  |
| PCMT1   | 1.5277758  |
| PCMTD1  | 0.8873563  |
| PCNP    | 1.04393    |
| PCNXL3  | 1.5895619  |
| PCYT1A  | 1.2934585  |
| PDAP1   | 2.3808374  |
| PDCD10  | 2.3784175  |
| PDCD2   | 1.8504019  |
| PDCD2L  | 1.2851067  |
| PDCD5   | 1.811346   |
| PDCD6   | 1.7790709  |
| PDCD6IP | 2.224926   |
| PDCD7   | 1.6357179  |
| PDCL    | 1.5583129  |
| PDCL3   | 1.2818675  |
| PDE1B   | 0.98359585 |
| PDE4B   | 3.0051584  |
| PDE4C   | 1.2648001  |
| PDF     | 1.702043   |
| PDK4    | 3.1613145  |
| PDLIM1  | 1.2047114  |
| PDLIM7  | 2.1988134  |
| PDPK1   | 1.4431543  |
| PDRG1   | 0.8746705  |
| PDS5A   | 0.9584298  |
| PDSS1   | 1.4175305  |
| PDXX    | 1.0348697  |
| PDZD11  | 1.4902878  |
| PDZD8   | 1.8269024  |
| PEBP1   | 1.8531342  |
| PEF1    | 1.3808146  |
| PEG3    | 1.3555894  |
| PEG3OS  | 1.7035389  |
| PELI1   | 1.4803042  |
| PELP1   | 1.7443194  |
| PEPD    | 2.6067734  |
| PER1    | 1.7877088  |
| PES1    | 2.134264   |
| PEX11B  | 1.2904487  |
| PEX13   | 2.140504   |

|         |           |
|---------|-----------|
| PFDN1   | 0.986825  |
| PFDN2   | 1.4409709 |
| PFDN4   | 1.367135  |
| PFDN5   | 0.9310074 |
| PFKFB2  | 1.988172  |
| PFKFB3  | 4.4080696 |
| PFKL    | 1.9341993 |
| PFN1    | 1.8595977 |
| PGAM1   | 2.3938508 |
| PGAM5   | 1.6612492 |
| PGAP3   | 1.1499391 |
| PGD     | 1.1615915 |
| PGGT1B  | 1.6165452 |
| PGK1    | 2.7710714 |
| PGM1    | 1.5354013 |
| PGRMC2  | 1.1947136 |
| PGS1    | 1.6575384 |
| PHACTR4 | 1.745925  |
| PHF10   | 1.9412823 |
| PHF11A  | 1.9893188 |
| PHF11D  | 1.9193926 |
| PHF12   | 1.5656638 |
| PHF2    | 1.7355132 |
| PHF23   | 1.4654245 |
| PHF3    | 1.4079685 |
| PHF5A   | 1.9676228 |
| PHF8    | 1.5799799 |
| PHIP    | 1.29473   |
| PHKG2   | 1.4628015 |
| PHLDA1  | 2.4995952 |
| PHPT1   | 1.8012524 |
| PHRF1   | 1.4648538 |
| PHTF2   | 1.275579  |
| PHYHD1  | 1.4646349 |
| PI4K2A  | 2.279048  |
| PI4KA   | 1.2024369 |
| PI4KB   | 1.2772436 |
| PIAS4   | 1.1725798 |
| PICALM  | 2.4545379 |
| PIF1    | 1.3367276 |
| PIGC    | 1.3789537 |
| PIGF    | 1.1617928 |
| PIGL    | 2.0416346 |
| PIGN    | 1.0268157 |
| PIGR    | 3.0572443 |

|            |           |
|------------|-----------|
| PIGS       | 0.8163719 |
| PIGT       | 1.4520683 |
| PIGV       | 0.8833165 |
| PIGX       | 1.1518326 |
| PIGYL      | 0.8929267 |
| PIH1D1     | 1.6421595 |
| PIK3CA     | 1.1048331 |
| PIK3CB     | 0.740613  |
| PIK3CG     | 1.714433  |
| PIK3R1     | 0.9566884 |
| PIK3R4     | 1.3661346 |
| PIK3R5     | 2.5419044 |
| PIK3R6     | 1.7684999 |
| PILRA      | 2.335999  |
| PILRB2     | 2.2872066 |
| PIM1       | 3.7223077 |
| PIM2       | 1.9868863 |
| PIM3       | 3.8503065 |
| PIN1       | 1.5322361 |
| PIN1RT1    | 1.3477821 |
| PIN4       | 1.454042  |
| PINX1      | 3.0575304 |
| PIP4K2C    | 1.1353517 |
| PIP5K1A    | 6.4570208 |
| PIRA11     | 1.9406805 |
| PIRA2      | 2.1869555 |
| PIRA6      | 2.4306931 |
| PIRA7      | 2.3654084 |
| PIRB       | 1.7375622 |
| PISD       | 1.6800976 |
| PISD-PS1   | 1.5881538 |
| PITPNA     | 1.1751318 |
| PITPNB     | 1.4560966 |
| PITPNM2OS1 | 1.0955524 |
| PJA1       | 1.135664  |
| PJA2       | 1.312891  |
| PKN2       | 1.5368576 |
| PKNOX1     | 2.2490802 |
| PLA2G12A   | 1.952992  |
| PLA2G4A    | 1.3903532 |
| PLA2G4B    | 1.7760129 |
| PLA2G7     | 2.3667293 |
| PLAGL2     | 1.5952172 |
| PLAUR      | 2.7582202 |
| PLBD1      | 1.7847538 |



|         |            |
|---------|------------|
| PLCD4   | 1.4012456  |
| PLCL2   | 1.4624357  |
| PLD1    | 1.0436683  |
| PLEC    | 2.053187   |
| PLEK    | 2.275054   |
| PLEKHA3 | 2.5039477  |
| PLEKHA4 | 0.8780565  |
| PLEKHA5 | 1.4375765  |
| PLEKHF1 | 0.75025845 |
| PLEKHF2 | 1.087491   |
| PLEKHG3 | 1.9311175  |
| PLEKHG4 | 5.21315    |
| PLEKHJ1 | 1.5399299  |
| PLEKHM1 | 1.2723603  |
| PLEKHM2 | 1.2809834  |
| PLEKHS1 | 3.0859535  |
| PLOD3   | 1.4919419  |
| PLP1    | 0.8079953  |
| PLSCR1  | 3.7870274  |
| PLXNA2  | 2.069962   |
| PLXNB2  | 1.6979375  |
| PML     | 1.8913751  |
| PMM2    | 1.998642   |
| PMVK    | 2.7875605  |
| PNISR   | 1.1220708  |
| PNKP    | 1.3514571  |
| PNMA2   | 2.8561206  |
| PNN     | 1.6828127  |
| PNO1    | 2.69314    |
| PNP     | 4.085326   |
| PNP2    | 1.48509    |
| PNPLA2  | 1.7671561  |
| PNPLA6  | 1.1692486  |
| PNRC1   | 3.2596054  |
| PNRC2   | 1.1243267  |
| POC5    | 1.0318131  |
| POFUT1  | 0.8529992  |
| POFUT2  | 0.9068713  |
| POGK    | 1.4586596  |
| POGLUT1 | 1.5722008  |
| POGZ    | 1.4516106  |
| POLA2   | 0.6686225  |
| POLB    | 1.954936   |
| POLD2   | 1.1035092  |
| POLDIP3 | 1.5525618  |

|         |            |
|---------|------------|
| POLE3   | 1.0115767  |
| POLG    | 1.4718552  |
| POLR1A  | 1.8934178  |
| POLR1C  | 1.9690671  |
| POLR1D  | 0.86885643 |
| POLR1E  | 1.915937   |
| POLR2B  | 1.6167474  |
| POLR2C  | 1.347466   |
| POLR2D  | 1.2977376  |
| POLR2E  | 0.68889475 |
| POLR2F  | 1.3960013  |
| POLR2G  | 0.7488823  |
| POLR2H  | 1.3604546  |
| POLR2J  | 1.3352122  |
| POLR2K  | 1.238215   |
| POLR2M  | 1.0683608  |
| POLR3A  | 1.5400505  |
| POLR3B  | 1.4236875  |
| POLR3E  | 1.4051247  |
| POLR3K  | 0.7438326  |
| POLRMT  | 1.6546164  |
| POM121  | 1.6235662  |
| POMGNT1 | 1.3625073  |
| POMK    | 0.72427464 |
| POMP    | 1.5296249  |
| POMT1   | 1.027633   |
| POMT2   | 1.0948703  |
| PON2    | 0.78757477 |
| PON3    | 1.1033964  |
| POP1    | 0.9713559  |
| POP4    | 0.81314373 |
| POP5    | 2.017014   |
| POP7    | 1.1833987  |
| POR     | 1.715364   |
| POT1A   | 1.5405369  |
| POT1B   | 1.8018236  |
| POU2F2  | 1.3889275  |
| PPAN    | 2.905645   |
| PPAT    | 0.98106813 |
| PPDPF   | 0.856771   |
| PPFIA1  | 1.576561   |
| PPFIBP1 | 1.1555991  |
| PPIA    | 1.3994036  |
| PPID    | 1.7693248  |
| PPIG    | 1.2298737  |

|          |            |
|----------|------------|
| PPIL1    | 0.7923324  |
| PPIL3    | 1.0606351  |
| PPIL4    | 1.541121   |
| PPM1B    | 1.6007023  |
| PPM1G    | 1.3326716  |
| PPM1H    | 0.9390383  |
| PPM1K    | 1.5138321  |
| PPM1N    | 2.670817   |
| PPME1    | 1.9437275  |
| PPNR     | 1.3283801  |
| PPP1CA   | 1.2096095  |
| PPP1CB   | 1.2300134  |
| PPP1CC   | 1.3776598  |
| PPP1R11  | 2.2034416  |
| PPP1R12C | 1.1434221  |
| PPP1R13L | 1.6898084  |
| PPP1R14B | 1.5356603  |
| PPP1R15A | 2.2038722  |
| PPP1R16A | 1.7720642  |
| PPP1R21  | 1.940836   |
| PPP1R35  | 1.4765792  |
| PPP1R37  | 1.1400146  |
| PPP1R7   | 1.483674   |
| PPP2CA   | 1.770834   |
| PPP2CB   | 1.1430049  |
| PPP2R1A  | 1.4311109  |
| PPP2R2A  | 1.6218462  |
| PPP2R2D  | 2.4170694  |
| PPP2R3C  | 1.6028247  |
| PPP2R4   | 0.9141011  |
| PPP2R5A  | 0.83498573 |
| PPP2R5B  | 1.8052363  |
| PPP2R5D  | 1.1428938  |
| PPP3CB   | 0.8888669  |
| PPP3R1   | 1.1859093  |
| PPP4C    | 1.8038244  |
| PPP4R1   | 1.5633512  |
| PPP4R2   | 1.4214725  |
| PPP5C    | 1.2290895  |
| PPP6C    | 1.5276155  |
| PPP6R1   | 0.8151498  |
| PPP6R3   | 1.1437459  |
| PPRC1    | 2.3918774  |
| PPT1     | 1.0324616  |
| PPTC7    | 1.0071278  |

|          |            |
|----------|------------|
| PQBP1    | 1.3602238  |
| PQLC1    | 1.2217913  |
| PRAF2    | 1.2757549  |
| PRAM1    | 2.6209865  |
| PRAMEF8  | 1.5225887  |
| PRCC     | 0.7929754  |
| PRDM2    | 1.1680975  |
| PRDM4    | 1.9919105  |
| PRDX5    | 3.4152174  |
| PRICKLE3 | 1.3071926  |
| PRIM1    | 1.278758   |
| PRKAA1   | 1.5582323  |
| PRKACB   | 1.1820965  |
| PRKAG1   | 1.3468409  |
| PRKAR1A  | 1.5974002  |
| PRKCB    | 1.3298774  |
| PRKCD    | 1.6032434  |
| PRKRIP1  | 1.6411805  |
| PRKRIR   | 0.86287117 |
| PRMT1    | 1.6148047  |
| PRMT10   | 1.2835169  |
| PRMT3    | 2.0877824  |
| PRMT5    | 1.4941192  |
| PRMT7    | 1.4301028  |
| PRNP     | 1.4513869  |
| PROK2    | 7.619211   |
| PRORSD1  | 2.2969499  |
| PROSC    | 2.2826185  |
| PROSER2  | 1.1782846  |
| PRPF18   | 1.3339081  |
| PRPF3    | 1.3007374  |
| PRPF31   | 1.7045741  |
| PRPF38A  | 1.6419353  |
| PRPF38B  | 1.6478944  |
| PRPF39   | 1.6147051  |
| PRPF4    | 1.3867998  |
| PRPF40A  | 2.7933483  |
| PRPF4B   | 1.5104852  |
| PRPF6    | 2.058539   |
| PRPF8    | 1.5205646  |
| PRPS1    | 1.8263721  |
| PRPSAP1  | 1.3899708  |
| PRPSAP2  | 1.4842529  |
| PRR14    | 1.3701959  |
| PRR14L   | 1.2737141  |

|         |           |
|---------|-----------|
| PRRC2A  | 1.4321404 |
| PRRC2C  | 1.1673827 |
| PRRG2   | 1.2053795 |
| PSAP    | 0.8322296 |
| PSAT1   | 0.8052554 |
| PSEN1   | 2.3080034 |
| PSEN2   | 2.337473  |
| PSENEEN | 1.5927119 |
| PSMA2   | 1.5788884 |
| PSMA6   | 2.0861273 |
| PSMA7   | 2.2104578 |
| PSMB10  | 2.4243436 |
| PSMB5   | 2.0682445 |
| PSMB8   | 1.4750395 |
| PSMB9   | 2.2781253 |
| PSMC1   | 1.7380905 |
| PSMC2   | 2.1373796 |
| PSMC3   | 1.7192049 |
| PSMC4   | 2.1909475 |
| PSMC5   | 1.7637854 |
| PSMC6   | 2.1614542 |
| PSMD1   | 2.0748754 |
| PSMD11  | 2.1456127 |
| PSMD12  | 2.404354  |
| PSMD13  | 1.6226535 |
| PSMD14  | 2.0702968 |
| PSMD2   | 2.2825708 |
| PSMD3   | 2.179336  |
| PSMD4   | 2.1556315 |
| PSMD6   | 2.3376741 |
| PSMD7   | 2.019435  |
| PSMD9   | 1.8052807 |
| PSME1   | 1.9823742 |
| PSME2B  | 1.8111143 |
| PSME3   | 1.9212136 |
| PSMF1   | 1.4432287 |
| PSMG3   | 1.8485136 |
| PSMG4   | 2.0674753 |
| PSPH    | 0.9554992 |
| PSTPIP2 | 2.3968992 |
| PTBP1   | 1.5000057 |
| PTBP3   | 1.1139779 |
| PTCD3   | 2.090692  |
| PTDSS1  | 0.7759342 |
| PTEN    | 1.302103  |

|         |            |
|---------|------------|
| PTGES3  | 1.8293738  |
| PTGS2   | 3.1314769  |
| PTMS    | 0.8339224  |
| PTOV1   | 0.87670135 |
| PTP4A2  | 0.8565178  |
| PTPLA   | 1.6248164  |
| PTPN1   | 0.80876064 |
| PTPN11  | 1.2163363  |
| PTPN12  | 1.9538851  |
| PTPN2   | 2.3847685  |
| PTPN23  | 2.4773011  |
| PTPN6   | 2.0389457  |
| PTPRC   | 1.4612212  |
| PTPRF   | 0.6939783  |
| PTPRK   | 1.5021429  |
| PTRH1   | 0.70736504 |
| PTRHD1  | 1.3825231  |
| PTTG1IP | 1.738358   |
| PUF60   | 1.4694648  |
| PUM1    | 1.4075494  |
| PUM2    | 1.2711372  |
| PURA    | 0.797699   |
| PURB    | 1.0698633  |
| PUS1    | 2.163959   |
| PUS10   | 1.4789162  |
| PUS3    | 0.68905973 |
| PUS7    | 1.7874994  |
| PUS7L   | 1.1172826  |
| PUSL1   | 1.3443222  |
| PVR     | 2.6915727  |
| PVRL1   | 1.8188524  |
| PVRL2   | 1.0223651  |
| PWP1    | 2.3693438  |
| PWP2    | 2.2596483  |
| PXDC1   | 2.7160757  |
| PXK     | 1.673682   |
| PYCR2   | 0.9909911  |
| PYDC4   | 0.85890985 |
| PYGL    | 2.1681724  |
| PYGO1   | 1.3951092  |
| PYGO2   | 1.8015418  |
| PYHIN1  | 2.5041556  |
| QARS    | 1.9977727  |
| QRICH1  | 1.3047194  |
| QRSL1   | 1.7732096  |

|          |            |
|----------|------------|
| QTRTD1   | 2.7455602  |
| R3HCC1L  | 1.2361941  |
| R3HDM1   | 1.2174473  |
| R3HDM2   | 1.5870132  |
| RAB1     | 2.5282335  |
| RAB10    | 1.6905432  |
| RAB11A   | 1.7491121  |
| RAB11B   | 0.9430785  |
| RAB12    | 1.2043543  |
| RAB14    | 1.1571336  |
| RAB18    | 2.165524   |
| RAB1B    | 0.7579503  |
| RAB20    | 2.046442   |
| RAB21    | 1.8462391  |
| RAB22A   | 1.8225088  |
| RAB24    | 1.9407358  |
| RAB26OS  | 2.4057176  |
| RAB2A    | 1.7196274  |
| RAB32    | 3.0757952  |
| RAB33B   | 1.4166155  |
| RAB35    | 1.5783815  |
| RAB37    | 0.7955518  |
| RAB3C    | 0.8545723  |
| RAB3GAP1 | 1.467555   |
| RAB3GAP2 | 1.6659532  |
| RAB3IP   | 1.5152082  |
| RAB40C   | 1.3068337  |
| RAB43    | 1.3251963  |
| RAB4B    | 1.7229424  |
| RAB5A    | 2.1261554  |
| RAB6A    | 1.8210659  |
| RAB7     | 3.1504989  |
| RAB7L1   | 0.7412405  |
| RAB8A    | 1.4020987  |
| RAB8B    | 1.7448688  |
| RABAC1   | 1.0045476  |
| RABEP1   | 0.93158674 |
| RABEP2   | 0.9078779  |
| RABGEF1  | 1.1625562  |
| RABGGTA  | 1.2624011  |
| RABGGTB  | 1.7678623  |
| RABL2    | 1.460566   |
| RAC1     | 1.3483286  |
| RAC2     | 1.9911137  |
| RAD17    | 2.2249584  |

|          |            |
|----------|------------|
| RAD21    | 1.0519543  |
| RAD23B   | 1.988069   |
| RAD51C   | 1.774581   |
| RAD52    | 1.7901721  |
| RAD54L2  | 1.1317782  |
| RAE1     | 1.7804427  |
| RAF1     | 1.49506    |
| RAI1     | 0.81679296 |
| RALA     | 1.4283638  |
| RALGAPA1 | 1.1694732  |
| RALGAPA2 | 1.3617463  |
| RALGDS   | 2.0541244  |
| RALY     | 1.3524089  |
| RAN      | 1.952301   |
| RANBP1   | 2.019844   |
| RANBP10  | 1.3880844  |
| RANBP2   | 1.8678584  |
| RANBP3   | 2.8003173  |
| RANBP9   | 1.7378945  |
| RANGAP1  | 2.4075308  |
| RAP1B    | 1.4532785  |
| RAPGEF6  | 0.96091413 |
| RARS2    | 1.7675881  |
| RASA1    | 1.2105057  |
| RASA4    | 1.6956348  |
| RASD1    | 4.481538   |
| RASGEF1B | 2.917266   |
| RASGRP1  | 1.874423   |
| RASL2-9  | 2.348247   |
| RASSF1   | 1.7998223  |
| RASSF4   | 1.6455588  |
| RBAK     | 0.9079838  |
| RBBP4    | 0.86904526 |
| RBBP5    | 1.7915373  |
| RBBP6    | 1.5267944  |
| RBBP7    | 1.0740166  |
| RBCK1    | 1.5238438  |
| RBFOX2   | 1.5649204  |
| RBM10    | 2.2438383  |
| RBM12    | 1.1890798  |
| RBM12B2  | 0.71177626 |
| RBM14    | 1.695755   |
| RBM15    | 2.8570542  |
| RBM17    | 2.0980916  |
| RBM18    | 1.477529   |



|        |            |
|--------|------------|
| RBM19  | 2.5122104  |
| RBM22  | 1.156451   |
| RBM25  | 1.5684118  |
| RBM26  | 2.139051   |
| RBM27  | 1.4117448  |
| RBM28  | 1.1701527  |
| RBM33  | 2.1116428  |
| RBM34  | 1.2194681  |
| RBM39  | 1.7327356  |
| RBM3OS | 2.3201091  |
| RBM4   | 2.3764787  |
| RBM42  | 1.6767826  |
| RBM45  | 0.81448054 |
| RBM47  | 2.1806974  |
| RBM4B  | 2.1097112  |
| RBM5   | 1.331605   |
| RBM6   | 1.2795949  |
| RBM8A  | 1.5184565  |
| RBMXL1 | 1.7262411  |
| RBPMS  | 1.2562766  |
| RBX1   | 1.3547449  |
| RC3H1  | 1.0653467  |
| RC3H2  | 1.5127444  |
| RCAN1  | 3.2534552  |
| RCC2   | 0.94493103 |
| RCHY1  | 1.8041363  |
| RCOR1  | 0.74370575 |
| RDH1   | 1.9227419  |
| RDH10  | 1.943665   |
| RDX    | 0.98187685 |
| REEP3  | 1.8142223  |
| RELA   | 2.522079   |
| RELB   | 2.0631094  |
| RELL1  | 2.0346556  |
| REPS1  | 1.3758864  |
| REPS2  | 0.96723366 |
| RER1   | 2.0251784  |
| REST   | 1.5611763  |
| REXO4  | 1.8221722  |
| RFC2   | 0.7529297  |
| RFK    | 1.0897651  |
| RFWD2  | 1.7243557  |
| RFWD3  | 1.2732038  |
| RFX5   | 1.4156659  |
| RFXAP  | 1.4446907  |

|          |            |
|----------|------------|
| RGL3     | 2.6351047  |
| RGS1     | 2.6850772  |
| RGS16    | 5.202181   |
| RHBDD2   | 1.204534   |
| RHBDF2   | 2.6326513  |
| RHOB     | 1.8544388  |
| RHOC     | 2.74786    |
| RHOQ     | 1.3247252  |
| RHOT1    | 1.4150128  |
| RHOT2    | 0.81865025 |
| RHOU     | 3.678513   |
| RHOX8    | 3.3118129  |
| RIC8     | 1.0656075  |
| RICTOR   | 1.7340336  |
| RIF1     | 1.0530217  |
| RILP     | 1.3823133  |
| RILPL2   | 1.4849148  |
| RIOK1    | 1.0608344  |
| RIOK2    | 2.3230152  |
| RIOK3    | 1.4536972  |
| RIPK1    | 2.824726   |
| RIT1     | 0.7726674  |
| RLF      | 1.2606511  |
| RLIM     | 1.3013206  |
| RMDN2    | 0.82557917 |
| RMDN3    | 3.2369685  |
| RMRP     | 0.7066512  |
| RN28S1   | 1.5623655  |
| RN4.5S   | 2.1226273  |
| RNASE10  | 1.201396   |
| RNASEH1  | 1.6761823  |
| RNASEH2B | 1.4281306  |
| RNASEH2C | 1.2572427  |
| RNASEK   | 1.4949183  |
| RND1     | 5.9354925  |
| RND3     | 2.976759   |
| RNF10    | 1.7166395  |
| RNF11    | 1.6805024  |
| RNF111   | 1.3723025  |
| RNF114   | 1.6515722  |
| RNF115   | 1.3210678  |
| RNF123   | 2.0558848  |
| RNF125   | 3.695417   |
| RNF13    | 1.7870722  |
| RNF130   | 1.6605043  |

|         |            |
|---------|------------|
| RNF138  | 1.0212607  |
| RNF139  | 1.4910817  |
| RNF14   | 1.5524178  |
| RNF141  | 0.81652594 |
| RNF144B | 0.7731087  |
| RNF146  | 0.7484827  |
| RNF149  | 2.583354   |
| RNF167  | 1.3073225  |
| RNF168  | 0.81118584 |
| RNF169  | 1.8682542  |
| RNF181  | 0.973259   |
| RNF19B  | 2.7824984  |
| RNF2    | 1.6315589  |
| RNF20   | 1.4555902  |
| RNF213  | 2.584289   |
| RNF214  | 0.6446459  |
| RNF216  | 1.5176649  |
| RNF24   | 1.3654971  |
| RNF25   | 0.9431491  |
| RNF31   | 1.7584939  |
| RNF4    | 2.081738   |
| RNF40   | 2.9747105  |
| RNF41   | 0.80174327 |
| RNF44   | 1.7765546  |
| RNF6    | 1.3414583  |
| RNF7    | 1.344842   |
| RNF8    | 1.3220854  |
| RNFT1   | 1.5942535  |
| RNGTT   | 1.3779161  |
| RNH1    | 1.5507355  |
| RNPC3   | 1.2570508  |
| RNPEPL1 | 0.8222966  |
| RNPS1   | 1.5794272  |
| RNU12   | 0.7027092  |
| RPA2    | 1.2768645  |
| RPAIN   | 2.3830404  |
| RPE     | 1.2060547  |
| RPF1    | 1.7823834  |
| RPF2    | 2.6951337  |
| RPGRIP1 | 1.357204   |
| RPL10   | 1.3251162  |
| RPL10A  | 1.8687687  |
| RPL11   | 1.4528131  |
| RPL12   | 1.5877843  |
| RPL13   | 1.2724853  |

|            |            |
|------------|------------|
| RPL13A     | 1.4029717  |
| RPL14      | 0.76209354 |
| RPL15      | 1.441853   |
| RPL17      | 1.2346811  |
| RPL18      | 1.4367714  |
| RPL18A     | 1.1021018  |
| RPL19      | 1.3297563  |
| RPL21      | 1.394629   |
| RPL22      | 1.3554311  |
| RPL22L1    | 1.544538   |
| RPL23      | 1.0294542  |
| RPL23A     | 1.1830406  |
| RPL24      | 1.118958   |
| RPL26      | 1.1576066  |
| RPL27      | 1.2961373  |
| RPL27A     | 1.4665966  |
| RPL28      | 1.3228898  |
| RPL29      | 1.3064332  |
| RPL3       | 1.4043541  |
| RPL30      | 0.94584656 |
| RPL31      | 0.98036623 |
| RPL31-PS12 | 1.1192002  |
| RPL34      | 1.1982636  |
| RPL35      | 1.1961622  |
| RPL35A     | 1.3007879  |
| RPL36      | 1.6489711  |
| RPL36A     | 1.497572   |
| RPL36AL    | 1.7999277  |
| RPL37A     | 1.246419   |
| RPL38      | 1.5430479  |
| RPL39      | 1.2485423  |
| RPL4       | 1.5199118  |
| RPL41      | 2.0361366  |
| RPL5       | 0.8263364  |
| RPL5-PS2   | 1.2760673  |
| RPL6       | 1.2980084  |
| RPL7       | 1.4952288  |
| RPL7A      | 1.7193942  |
| RPL8       | 1.295227   |
| RPL9       | 1.1350498  |
| RPLP0      | 1.5586467  |
| RPLP1      | 0.95756865 |
| RPLP2      | 1.7294273  |
| RPN1       | 2.8300958  |
| RPN2       | 1.4249444  |

|            |            |
|------------|------------|
| RPP14      | 1.688139   |
| RPP21      | 1.158102   |
| RPP25L     | 1.3172388  |
| RPP30      | 1.2187922  |
| RPRD2      | 1.0996988  |
| RPS10      | 1.2548227  |
| RPS11      | 1.2337575  |
| RPS11-PS1  | 1.1537771  |
| RPS12      | 1.4143066  |
| RPS12L2    | 1.3598013  |
| RPS12-PS16 | 1.2207284  |
| RPS13      | 1.5540066  |
| RPS14      | 1.1971312  |
| RPS15      | 0.99609184 |
| RPS15A     | 1.1360326  |
| RPS16      | 1.3221035  |
| RPS17      | 1.4077702  |
| RPS18      | 1.4422708  |
| RPS19      | 1.0258174  |
| RPS19BP1   | 2.1455545  |
| RPS2       | 1.7252479  |
| RPS20      | 1.1164694  |
| RPS21      | 1.1026454  |
| RPS23      | 1.6724668  |
| RPS24      | 1.1259613  |
| RPS25      | 1.0883112  |
| RPS26      | 1.2115259  |
| RPS27      | 1.431788   |
| RPS27A     | 1.3573828  |
| RPS28      | 1.4284735  |
| RPS29      | 1.0808115  |
| RPS3       | 1.4659481  |
| RPS3A1     | 1.142405   |
| RPS4L      | 0.83168936 |
| RPS4X      | 1.1276073  |
| RPS5       | 1.3809061  |
| RPS6       | 1.1066165  |
| RPS6KB1    | 1.4120283  |
| RPS6KB2    | 1.3131876  |
| RPS6KL1    | 1.013449   |
| RPS7       | 2.016603   |
| RPS8       | 1.3858919  |
| RPS9       | 1.208642   |
| RPSA       | 1.6556935  |
| RPTOR      | 1.2059865  |

|         |            |
|---------|------------|
| RQCD1   | 1.8850799  |
| RRAGA   | 2.612486   |
| RRAGC   | 1.7006621  |
| RRAS2   | 1.8036408  |
| RREB1   | 0.97013235 |
| RRN3    | 1.5220842  |
| RRNAD1  | 0.7642963  |
| RRP1    | 1.3971853  |
| RRP15   | 2.5405416  |
| RRP1B   | 0.7438655  |
| RRP36   | 1.7688656  |
| RRP7A   | 1.6558032  |
| RRP8    | 1.1817205  |
| RRP9    | 2.1015697  |
| RRS1    | 2.5466037  |
| RSAD2   | 3.19039    |
| RSL1    | 1.3889942  |
| RSL1D1  | 1.8466854  |
| RSL24D1 | 1.4720826  |
| RSPH3B  | 2.025866   |
| RSPRY1  | 2.0201426  |
| RSRC2   | 2.10107    |
| RSRP1   | 1.3336625  |
| RTCB    | 1.5990944  |
| RTEL1   | 0.7790432  |
| RTF1    | 1.1913111  |
| RTFDC1  | 1.4307952  |
| RTN3    | 1.1724386  |
| RTN4    | 1.5636349  |
| RTP4    | 2.5118499  |
| RUFY1   | 1.502429   |
| RUFY3   | 1.3590517  |
| RUNDC1  | 1.4499326  |
| RUSC1   | 0.87578773 |
| RUSC2   | 1.3602943  |
| RUVBL1  | 1.9134445  |
| RXRB    | 2.5379462  |
| S100A10 | 1.7772598  |
| S100A8  | 3.3754263  |
| S100A9  | 2.6162338  |
| SAA1    | 7.2229996  |
| SAA2    | 9.01216    |
| SAA3    | 7.074836   |
| SAC3D1  | 1.205894   |
| SACM1L  | 2.2359548  |

|         |            |
|---------|------------|
| SACS    | 1.076179   |
| SAE1    | 0.97228813 |
| SAFB    | 1.8739386  |
| SAFB2   | 1.8902726  |
| SAMD4B  | 1.9961557  |
| SAMD8   | 1.2454457  |
| SAMD9L  | 2.011198   |
| SAMM50  | 1.899641   |
| SAMSN1  | 3.3693862  |
| SAP130  | 1.2988749  |
| SAP18   | 1.6084819  |
| SAP30   | 1.5461445  |
| SAP30BP | 1.5467587  |
| SAP30L  | 1.1147437  |
| SAR1A   | 2.1974235  |
| SARNP   | 1.6137176  |
| SARS    | 1.5705209  |
| SART3   | 1.6655202  |
| SASH1   | 1.5150776  |
| SBDS    | 1.3001871  |
| SBF1    | 1.8236814  |
| SBNO1   | 1.7150297  |
| SBNO2   | 2.5778995  |
| SCAF1   | 0.79110146 |
| SCAF4   | 1.3970852  |
| SCAF8   | 1.0755563  |
| SCAMP1  | 1.6669674  |
| SCAMP2  | 1.2332993  |
| SCAMP4  | 2.1299558  |
| SCAND1  | 1.4673591  |
| SCAP    | 1.481102   |
| SCARB2  | 1.607491   |
| SCIMP   | 1.1827178  |
| SCNM1   | 1.48282    |
| SCOC    | 0.8035157  |
| SCPEP1  | 1.6124635  |
| SCRIB   | 1.6276827  |
| SCYL1   | 1.943429   |
| SCYL2   | 2.5069633  |
| SCYL3   | 1.7163973  |
| SDAD1   | 2.2546144  |
| SDC4    | 3.950244   |
| SDCCAG3 | 1.7256408  |
| SDE2    | 2.0464754  |
| SDF2    | 1.494245   |

|           |            |
|-----------|------------|
| SDF4      | 1.4630699  |
| SDHAF1    | 1.3588891  |
| SDHAF2    | 1.7244349  |
| SDR39U1   | 0.78690434 |
| SEC1      | 1.3669598  |
| SEC11A    | 1.9915552  |
| SEC11C    | 1.2468681  |
| SEC14L4   | 2.3318868  |
| SEC23IP   | 1.8614321  |
| SEC24B    | 1.5156946  |
| SEC24C    | 1.7080398  |
| SEC62     | 1.2667952  |
| SECISBP2  | 1.1116419  |
| SECISBP2L | 0.8699124  |
| SEH1L     | 2.2189474  |
| SELK      | 2.1367173  |
| SELP      | 4.6926584  |
| SELT      | 1.6933227  |
| SEMA4A    | 2.0517464  |
| SEMA4B    | 0.6557369  |
| SEMA4C    | 1.7968869  |
| SEMA6B    | 1.5048556  |
| SEMA6D    | 1.439743   |
| SENP2     | 1.5490298  |
| SENP3     | 1.563664   |
| SENP5     | 1.8692007  |
| SEPW1     | 0.68833256 |
| SERBP1    | 2.1125455  |
| SERF2     | 1.34554    |
| SERGEF    | 1.0076399  |
| SERHL     | 1.3536434  |
| SERINC1   | 1.8887463  |
| SERINC3   | 1.3654513  |
| SERPINA3F | 3.7608747  |
| SERPINA3G | 3.101521   |
| SERPINA3I | 4.3343544  |
| SERPINA3N | 7.0658545  |
| SERPINB2  | 2.4895825  |
| SERPINB8  | 1.7699418  |
| SERPINE1  | 5.309525   |
| SET       | 1.8442602  |
| SETD1A    | 1.5059185  |
| SETD1B    | 1.3091574  |
| SETD2     | 1.3538404  |
| SETD5     | 1.2396355  |



|          |            |
|----------|------------|
| SETD6    | 1.993442   |
| SETD8    | 1.0726204  |
| SETDB1   | 1.2538881  |
| SETX     | 1.4289594  |
| SF1      | 1.8888173  |
| SF3A1    | 1.625771   |
| SF3A3    | 1.7042427  |
| SF3B2    | 1.6066661  |
| SF3B3    | 2.083228   |
| SF3B4    | 1.7983537  |
| SF3B5    | 1.2999802  |
| SF3B6    | 2.0467763  |
| SF11     | 1.8265591  |
| SFMBT1   | 1.5590477  |
| SFPQ     | 1.8838434  |
| SFR1     | 1.0688572  |
| SFSWAP   | 1.2746243  |
| SFT2D3   | 0.7424054  |
| SGK3     | 0.91828585 |
| SGMS1    | 2.4664183  |
| SGPL1    | 1.8100181  |
| SGSH     | 1.8085313  |
| SGSM3    | 1.3257346  |
| SGTA     | 1.3020873  |
| SH2B1    | 2.9534316  |
| SH2B2    | 3.6803575  |
| SH3BGRL  | 1.2719054  |
| SH3BP5L  | 0.7739186  |
| SH3GL1   | 1.8121405  |
| SH3GLB1  | 1.273612   |
| SH3PXD2B | 2.7135596  |
| SHARPIN  | 1.6016002  |
| SHB      | 1.3908639  |
| SHC1     | 2.0735583  |
| SHC4     | 1.0428691  |
| SHFM1    | 1.5113049  |
| SHKBP1   | 1.0457444  |
| SHOC2    | 1.6997328  |
| SHPRH    | 0.9283836  |
| SHQ1     | 2.9526951  |
| SHROOM2  | 1.0289316  |
| SIGLECE  | 1.714735   |
| SIGLECH  | 1.5924478  |
| SIK1     | 2.0601401  |
| SIK3     | 1.277597   |

|          |            |
|----------|------------|
| SIKE1    | 0.9595876  |
| SIN3A    | 1.3663769  |
| SIPA1L1  | 1.0057015  |
| SIRPA    | 1.8099046  |
| SIRT1    | 1.2647166  |
| SIRT2    | 1.1292963  |
| SIRT7    | 1.5172286  |
| SKAP2    | 1.2374701  |
| SKIL     | 1.6556253  |
| SKINT7   | 1.8669429  |
| SKIV2L2  | 1.5971608  |
| SKP1A    | 1.6374459  |
| SLA      | 2.3391376  |
| SLAMF7   | 1.9745555  |
| SLBP     | 0.7886162  |
| SLC10A1  | 1.9403944  |
| SLC10A3  | 1.3011751  |
| SLC10A6  | 3.3947759  |
| SLC11A1  | 3.0038033  |
| SLC12A4  | 1.3296666  |
| SLC12A7  | 1.7800412  |
| SLC15A3  | 3.0493526  |
| SLC15A4  | 1.2063727  |
| SLC16A3  | 2.62988    |
| SLC16A6  | 3.1430316  |
| SLC1A4   | 1.9084373  |
| SLC20A1  | 2.3300467  |
| SLC22A5  | 2.8187814  |
| SLC24A5  | 1.1542144  |
| SLC25A11 | 0.92436934 |
| SLC25A12 | 1.4778843  |
| SLC25A19 | 1.1791167  |
| SLC25A25 | 4.2372317  |
| SLC25A28 | 1.8698215  |
| SLC25A3  | 2.1942153  |
| SLC25A30 | 1.2530844  |
| SLC25A33 | 2.6656137  |
| SLC25A37 | 0.9052882  |
| SLC25A38 | 1.8480544  |
| SLC25A46 | 1.5973911  |
| SLC25A5  | 1.9815679  |
| SLC25A51 | 0.6655817  |
| SLC26A2  | 1.3660209  |
| SLC29A1  | 0.98349667 |
| SLC29A2  | 1.6287186  |

|             |            |
|-------------|------------|
| SLC2A1      | 2.3069649  |
| SLC2A4RG-PS | 1.2351589  |
| SLC2A6      | 3.4702468  |
| SLC30A4     | 1.4584675  |
| SLC30A6     | 2.4799333  |
| SLC30A9     | 1.826549   |
| SLC31A2     | 2.164506   |
| SLC35A4     | 1.1187963  |
| SLC35B2     | 1.0958152  |
| SLC35B3     | 1.580637   |
| SLC35C2     | 1.639276   |
| SLC35E1     | 1.6505141  |
| SLC35F6     | 1.120522   |
| SLC38A2     | 3.5634303  |
| SLC38A4     | 4.0965977  |
| SLC39A1     | 2.5714507  |
| SLC39A13    | 0.6623769  |
| SLC39A6     | 0.9660425  |
| SLC3A2      | 2.4644017  |
| SLC41A1     | 2.1880624  |
| SLC41A3     | 0.682981   |
| SLC5A6      | 1.2405319  |
| SLC6A8      | 1.5257182  |
| SLC7A1      | 2.060163   |
| SLC7A11     | 1.6014695  |
| SLC7A6OS    | 2.452035   |
| SLC7A7      | 1.818006   |
| SLC7A8      | 1.9223967  |
| SLC9A6      | 1.2859225  |
| SLC9A8      | 2.1474452  |
| SLFN1       | 2.886678   |
| SLFN10-PS   | 0.92507505 |
| SLFN2       | 2.3680825  |
| SLFN3       | 2.2933495  |
| SLFN4       | 4.947805   |
| SLFN5       | 1.2662282  |
| SLFN8       | 1.6446476  |
| SLIRP       | 1.6310139  |
| SLK         | 1.371799   |
| SLMAP       | 0.9791951  |
| SLMO2       | 1.6439047  |
| SLPI        | 2.523252   |
| SLTM        | 1.7504373  |
| SLX4        | 1.9549775  |
| SMAD1       | 1.4620388  |

|            |            |
|------------|------------|
| SMAD2      | 0.9543805  |
| SMAD4      | 1.509933   |
| SMAGP      | 0.95551443 |
| SMAP1      | 1.1111484  |
| SMAP2      | 1.3451014  |
| SMARCA4    | 1.3601351  |
| SMARCA5    | 1.5498829  |
| SMARCA5-PS | 1.0361562  |
| SMARCAD1   | 1.5403199  |
| SMARCB1    | 1.2486353  |
| SMARCC2    | 1.2102804  |
| SMARCD2    | 0.9385948  |
| SMC1A      | 1.4173379  |
| SMC3       | 1.3159094  |
| SMC5       | 1.6455779  |
| SMCHD1     | 1.2353635  |
| SMCR8      | 2.2800245  |
| SMDT1      | 1.7874599  |
| SMEK1      | 1.6228461  |
| SMEK2      | 1.4484878  |
| SMG1       | 1.7763624  |
| SMG5       | 1.8654785  |
| SMG7       | 1.3113184  |
| SMG9       | 0.8166113  |
| SMIM11     | 1.2943449  |
| SMIM12     | 0.8935394  |
| SMIM13     | 1.2696366  |
| SMIM19     | 0.877553   |
| SMIM20     | 1.5791335  |
| SMIM7      | 1.4284525  |
| SMN1       | 1.3085098  |
| SMNDC1     | 2.253878   |
| SMOX       | 2.147519   |
| SMPD1      | 1.9047413  |
| SMPD4      | 1.0576124  |
| SMPDL3A    | 0.7593031  |
| SMURF2     | 0.74120235 |
| SNAP23     | 1.8197236  |
| SNAP29     | 2.0452447  |
| SNAPC1     | 2.5661016  |
| SNAPC2     | 1.3134027  |
| SNAPC3     | 1.0960083  |
| SNAPC4     | 1.4432015  |
| SNF8       | 1.6466203  |
| SNHG1      | 1.7878156  |

|          |            |
|----------|------------|
| SNHG12   | 2.3657885  |
| SNHG6    | 3.1436958  |
| SNIP1    | 1.7444482  |
| SNORA74A | 1.1478903  |
| SNRNP200 | 1.2141461  |
| SNRNP25  | 0.89411306 |
| SNRNP27  | 1.2748895  |
| SNRNP48  | 2.3133492  |
| SNRNP70  | 1.8626862  |
| SNRPA    | 2.0625257  |
| SNRPA1   | 1.5836535  |
| SNRPB    | 0.9122133  |
| SNRPB2   | 0.7476015  |
| SNRPC    | 1.9083719  |
| SNRPD1   | 1.7394629  |
| SNRPD2   | 1.3865056  |
| SNRPD3   | 1.540606   |
| SNRPE    | 1.0958962  |
| SNRPG    | 1.4672661  |
| SNTB2    | 2.3291721  |
| SNTG2    | 3.18989    |
| SNUPN    | 1.367651   |
| SNW1     | 1.2206316  |
| SNX1     | 1.6101675  |
| SNX10    | 4.06307    |
| SNX11    | 1.4139261  |
| SNX13    | 1.4672823  |
| SNX14    | 1.1619468  |
| SNX15    | 1.3291397  |
| SNX16    | 1.6156907  |
| SNX17    | 1.196475   |
| SNX18    | 2.3256092  |
| SNX19    | 1.9254289  |
| SNX2     | 0.9106474  |
| SNX20    | 2.2486057  |
| SNX27    | 1.1162157  |
| SNX3     | 2.0222168  |
| SNX4     | 1.1456625  |
| SNX5     | 1.0994601  |
| SNX7     | 1.863235   |
| SNX8     | 1.6826601  |
| SOCS1    | 3.9234796  |
| SOCS2    | 1.469459   |
| SOCS3    | 4.8660665  |
| SOCS4    | 1.4874341  |

|          |            |
|----------|------------|
| SOCS7    | 1.4932275  |
| SOD2     | 4.583622   |
| SON      | 1.5403099  |
| SORBS1   | 1.7804723  |
| SOWAHC   | 3.1910868  |
| SOX9     | 5.6855936  |
| SP1      | 1.7163239  |
| SP110    | 1.9364729  |
| SP140    | 1.504664   |
| SP3      | 0.9990654  |
| SPAG7    | 2.0600572  |
| SPAG9    | 1.3276334  |
| SPAST    | 1.7965121  |
| SPATA13  | 2.1534886  |
| SPATA2   | 0.8152733  |
| SPATA5   | 2.1186304  |
| SPATA5L1 | 1.8063769  |
| SPC24    | 1.1532295  |
| SPCS1    | 1.7142897  |
| SPCS2    | 2.9787865  |
| SPEN     | 1.3260612  |
| SPG11    | 1.0136323  |
| SPG21    | 1.3202882  |
| SPI1     | 1.5942094  |
| SPIDR    | 1.6173353  |
| SPIN1    | 1.4104223  |
| SPNS1    | 1.6298809  |
| SPP1     | 1.5827289  |
| SPPL2A   | 2.8897023  |
| SPRED1   | 1.7323103  |
| SPRR2A2  | 1.1732988  |
| SPRYD7   | 2.2096663  |
| SPSB2    | 1.5116439  |
| SPSB3    | 1.1093769  |
| SPTLC1   | 1.8756647  |
| SPTLC2   | 1.4076705  |
| SPTY2D1  | 1.8698602  |
| SRD5A3   | 0.76903915 |
| SREBF1   | 1.3231096  |
| SREBF2   | 1.5090003  |
| SREK1    | 2.114358   |
| SRF      | 1.6681743  |
| SRFBP1   | 2.369213   |
| SRGN     | 2.1111155  |
| SRI      | 1.4838047  |

|            |           |
|------------|-----------|
| SRP14      | 1.148068  |
| SRP54C     | 3.0204296 |
| SRPK1      | 2.2123928 |
| SRRM1      | 0.8290272 |
| SRSF1      | 1.5885682 |
| SRSF10     | 1.4932876 |
| SRSF11     | 1.0990376 |
| SRSF3      | 1.8265867 |
| SRSF4      | 1.704381  |
| SRSF5      | 1.8650827 |
| SRSF6      | 2.1173472 |
| SRSF7      | 1.8975549 |
| SRSF9      | 1.365047  |
| SS18       | 1.4324074 |
| SS18L1     | 1.8116331 |
| SSB        | 1.5999556 |
| SSH3       | 2.041943  |
| SSNA1      | 1.0561743 |
| SSRP1      | 0.8804965 |
| SSU72      | 2.006971  |
| ST13       | 2.5757952 |
| ST3GAL1    | 3.2305298 |
| ST6GALNAC4 | 0.9838939 |
| ST7        | 2.0019312 |
| ST7L       | 1.7868748 |
| STAB1      | 1.3834052 |
| STAG1      | 1.7020211 |
| STAP2      | 4.298627  |
| STARD3     | 1.2015009 |
| STARD5     | 1.9216075 |
| STAT2      | 2.4340076 |
| STAT3      | 2.716607  |
| STAT5A     | 1.4871073 |
| STAT5B     | 0.7489414 |
| STAT6      | 1.2399836 |
| STAU1      | 1.9473481 |
| STBD1      | 1.2319927 |
| STEAP1     | 4.1295233 |
| STFA1      | 3.0438313 |
| STFA2L1    | 2.5957632 |
| STIP1      | 2.931241  |
| STK11      | 1.1974993 |
| STK16      | 1.6127954 |
| STK24      | 1.0475574 |
| STK25      | 0.7271261 |

|         |            |
|---------|------------|
| STK3    | 0.7018862  |
| STK35   | 1.7971077  |
| STK38   | 1.3075557  |
| STK40   | 2.624597   |
| STRA13  | 1.240067   |
| STRADB  | 1.5034995  |
| STRIP1  | 1.5391083  |
| STRN3   | 1.0513835  |
| STRN4   | 1.6456738  |
| STT3B   | 1.3513203  |
| STUB1   | 1.5478563  |
| STX12   | 1.5322981  |
| STX16   | 1.3902822  |
| STX4A   | 1.5908427  |
| STX8    | 1.075078   |
| STXBP2  | 1.4222693  |
| STXBP3A | 1.6412444  |
| STXBP3B | 1.4143128  |
| SUB1    | 1.275908   |
| SUCO    | 2.5202165  |
| SUDS3   | 1.029305   |
| SUGP1   | 1.7623954  |
| SUGT1   | 1.5401044  |
| SUMF1   | 1.40904    |
| SUMO1   | 1.5050802  |
| SUMO2   | 0.86888885 |
| SUN2    | 1.2615576  |
| SUPT16  | 2.5505059  |
| SUPT5   | 1.6237597  |
| SUPT6   | 1.5591574  |
| SUPT7L  | 2.8388436  |
| SUPV3L1 | 2.6377034  |
| SURF2   | 1.4987006  |
| SURF6   | 1.6693454  |
| SUSD2   | 1.9016726  |
| SUV39H2 | 1.9187708  |
| SUZ12   | 1.490438   |
| SWT1    | 1.2343521  |
| SYAP1   | 1.318471   |
| SYF2    | 1.1319084  |
| SYK     | 2.6736755  |
| SYMPK   | 1.8363385  |
| SYNCRIP | 1.5387621  |
| SYNGR2  | 1.0986257  |
| SYNJ1   | 1.1733756  |



|          |            |
|----------|------------|
| SYNJ2BP  | 1.596797   |
| SYNPO    | 1.1463361  |
| SYNPO2L  | 1.6810284  |
| SYPL     | 0.9919362  |
| SYS1     | 1.6417732  |
| SZRD1    | 1.4788957  |
| SZT2     | 0.86120987 |
| TAB2     | 1.2883873  |
| TAB3     | 1.3730497  |
| TACC1    | 1.0502825  |
| TACR2    | 1.4819279  |
| TADA1    | 1.8461652  |
| TADA2A   | 0.92578316 |
| TADA3    | 1.0517821  |
| TAF1     | 0.7344854  |
| TAF10    | 1.8594985  |
| TAF11    | 1.2956185  |
| TAF12    | 1.8437848  |
| TAF15    | 1.0251832  |
| TAF1B    | 0.908412   |
| TAF1C    | 1.3507221  |
| TAF1D    | 1.0630608  |
| TAF2     | 1.1131577  |
| TAF3     | 0.8168473  |
| TAF4A    | 1.1536336  |
| TAF4B    | 1.0820282  |
| TAF5     | 2.0410442  |
| TAF5L    | 1.6751304  |
| TAF6     | 1.5711455  |
| TAF6L    | 1.1772406  |
| TAF7L    | 1.4322681  |
| TAGAP    | 1.0538969  |
| TALDO1   | 1.1250534  |
| TANK     | 2.3361912  |
| TAP1     | 2.2094197  |
| TAP2     | 2.521069   |
| TAPBP    | 2.0654993  |
| TAPT1    | 1.7437277  |
| TARBP2   | 1.6003075  |
| TARDBP   | 1.5646577  |
| TARM1    | 3.0553846  |
| TAX1BP1  | 2.3161988  |
| TAZ      | 1.435771   |
| TBC1D10B | 1.6265192  |
| TBC1D13  | 1.1910706  |

|          |            |
|----------|------------|
| TBC1D15  | 2.5128255  |
| TBC1D17  | 1.4684834  |
| TBC1D20  | 1.5816364  |
| TBC1D22A | 0.7358761  |
| TBC1D23  | 1.7480245  |
| TBC1D25  | 1.2662144  |
| TBC1D2B  | 1.8069077  |
| TBC1D5   | 0.9603348  |
| TBC1D8   | 1.371074   |
| TBC1D9B  | 1.2985644  |
| TBCB     | 1.2428436  |
| TBCC     | 1.8275728  |
| TBCEL    | 0.75669146 |
| TBK1     | 2.9431362  |
| TBPL1    | 1.6199088  |
| TBRG1    | 2.4305487  |
| TCAIM    | 1.5848248  |
| TCEA1    | 2.2073345  |
| TCEB1    | 2.0207596  |
| TCEB2    | 1.7908106  |
| TCEB3    | 1.3628774  |
| TCERG1   | 1.72924    |
| TCF25    | 1.5231657  |
| TCIRG1   | 2.0172415  |
| TCN2     | 1.4606571  |
| TCOF1    | 1.1527991  |
| TCP1     | 1.9711633  |
| TCP11L2  | 2.1035666  |
| TCTA     | 1.0764925  |
| TDP2     | 1.4864697  |
| TDRD7    | 1.7949166  |
| TEAD1    | 1.7035189  |
| TEAD3    | 1.4996893  |
| TELO2    | 0.8388448  |
| TEP1     | 0.9493294  |
| TERF1    | 1.0281916  |
| TESK1    | 1.4912591  |
| TET2     | 1.3218999  |
| TEX10    | 1.2568932  |
| TEX261   | 1.0850277  |
| TEX264   | 1.4557824  |
| TEX30    | 1.6232071  |
| TFAM     | 1.8393569  |
| TFDP1    | 1.9296756  |
| TFE3     | 2.7380223  |

|          |            |
|----------|------------|
| TFEC     | 2.2209053  |
| TFIP11   | 1.6058245  |
| TFPT     | 1.6236806  |
| TGFBRAP1 | 1.1215303  |
| TGIF1    | 2.0610743  |
| TGM1     | 2.6443205  |
| TGM2     | 3.0908127  |
| TGOLN1   | 2.0659776  |
| TGS1     | 1.5145202  |
| TGTP1    | 3.4386082  |
| TGTP2    | 2.495862   |
| THA1     | 2.9233532  |
| THAP11   | 0.8339195  |
| THAP4    | 1.1602101  |
| THAP7    | 1.320334   |
| THG1L    | 1.4144175  |
| THOC1    | 1.2973356  |
| THOC2    | 1.3164215  |
| THOC3    | 1.6931806  |
| THOC5    | 2.0904703  |
| THOC6    | 1.132432   |
| THOP1    | 1.1332562  |
| THRAP3   | 0.9297066  |
| THUMPD1  | 1.7044926  |
| THUMPD3  | 1.842485   |
| THYN1    | 2.351633   |
| TIAL1    | 1.7552881  |
| TIGD2    | 1.4055619  |
| TIGD4    | 1.7465703  |
| TIGD5    | 1.3293612  |
| TIMM10   | 2.6970763  |
| TIMM10B  | 1.7399931  |
| TIMM17A  | 1.549017   |
| TIMM17B  | 3.042398   |
| TIMM22   | 0.92534876 |
| TIMM23   | 2.683652   |
| TIMM8A1  | 2.5467572  |
| TIMM9    | 1.9326315  |
| TIMMDC1  | 2.0211916  |
| TIMP1    | 3.460411   |
| TINF2    | 1.8287001  |
| TIPARP   | 2.780961   |
| TIPIN    | 1.0642214  |
| TIPRL    | 1.5969348  |
| TJAP1    | 2.0377502  |

|          |            |
|----------|------------|
| TK2      | 0.9324212  |
| TKT      | 1.2714286  |
| TLE1     | 1.5452614  |
| TLK1     | 0.96934366 |
| TLK2     | 1.5921521  |
| TLR2     | 4.3165045  |
| TLR3     | 1.1375089  |
| TLR6     | 2.3953714  |
| TLR7     | 1.2636323  |
| TM2D1    | 1.0167427  |
| TM2D2    | 1.4920459  |
| TM2D3    | 1.4241247  |
| TM9SF1   | 1.8304439  |
| TM9SF2   | 2.1474056  |
| TM9SF3   | 1.6935692  |
| TMA16    | 3.2347631  |
| TMBIM4   | 2.3854356  |
| TMBIM6   | 1.6908741  |
| TMC7     | 1.421932   |
| TMC8     | 0.70524025 |
| TMCO1    | 1.3172951  |
| TMCO4    | 1.9708838  |
| TMCO6    | 2.5259519  |
| TMED10   | 1.5315013  |
| TMED2    | 2.137003   |
| TMED3    | 1.8976936  |
| TMEM106C | 1.5152483  |
| TMEM11   | 1.4957318  |
| TMEM110  | 0.8349867  |
| TMEM115  | 1.5494375  |
| TMEM123  | 1.9473076  |
| TMEM125  | 1.3249307  |
| TMEM127  | 1.26228    |
| TMEM128  | 1.6689081  |
| TMEM129  | 1.706111   |
| TMEM134  | 1.1307797  |
| TMEM140  | 1.8086138  |
| TMEM141  | 1.1574636  |
| TMEM147  | 1.4583063  |
| TMEM14C  | 1.411171   |
| TMEM158  | 2.1682296  |
| TMEM160  | 0.99359703 |
| TMEM165  | 1.0604     |
| TMEM167B | 1.1194973  |
| TMEM170B | 1.541914   |

|            |            |
|------------|------------|
| TMEM173    | 2.2276697  |
| TMEM176B   | 2.0677757  |
| TMEM179B   | 1.7494969  |
| TMEM181B-f | 1.1795881  |
| TMEM184B   | 1.3602762  |
| TMEM184C   | 1.6028676  |
| TMEM185B   | 1.8880162  |
| TMEM192    | 1.6704702  |
| TMEM199    | 1.8729196  |
| TMEM2      | 2.9171786  |
| TMEM203    | 1.7048535  |
| TMEM206    | 1.2847791  |
| TMEM208    | 1.6751876  |
| TMEM215    | 0.6454921  |
| TMEM222    | 1.7306142  |
| TMEM223    | 0.9883499  |
| TMEM230    | 1.6811023  |
| TMEM239    | 1.7890553  |
| TMEM243    | 1.4718723  |
| TMEM251    | 1.9803886  |
| TMEM261    | 1.456419   |
| TMEM30A    | 1.393373   |
| TMEM33     | 2.0618324  |
| TMEM37     | 0.9752922  |
| TMEM50A    | 2.040121   |
| TMEM51     | 2.1129575  |
| TMEM55A    | 0.97722244 |
| TMEM55B    | 1.4973001  |
| TMEM57     | 1.0942597  |
| TMEM60     | 0.88481    |
| TMEM63B    | 0.9214897  |
| TMEM64     | 1.0571308  |
| TMEM66     | 2.0019135  |
| TMEM67     | 1.2648695  |
| TMEM68     | 1.7562385  |
| TMEM8      | 2.0206518  |
| TMEM80     | 0.96322346 |
| TMEM9B     | 0.93661594 |
| TMF1       | 1.4041209  |
| TMOD4      | 1.5107646  |
| TMPRSS3    | 2.3089504  |
| TMSB4X     | 1.1857352  |
| TMTC3      | 1.1343865  |
| TMUB1      | 1.1859736  |
| TMX1       | 1.7065315  |

|           |           |
|-----------|-----------|
| TMX2      | 1.5508833 |
| TMX4      | 0.918365  |
| TNF       | 5.8694487 |
| TNFAIP1   | 1.3605747 |
| TNFAIP2   | 3.8504605 |
| TNFAIP3   | 5.195488  |
| TNFAIP8L1 | 3.4665499 |
| TNFRSF11A | 1.2082839 |
| TNFRSF12A | 3.0750604 |
| TNFRSF1A  | 2.1380758 |
| TNFRSF1B  | 1.6970997 |
| TNFRSF21  | 1.342617  |
| TNFRSF4   | 1.8455305 |
| TNFRSF9   | 1.9615531 |
| TNFSF14   | 1.6440063 |
| TNFSF9    | 3.3039308 |
| TNIP1     | 3.5584035 |
| TNIP2     | 2.4724336 |
| TNIP3     | 1.4902315 |
| TNKS1BP1  | 1.2504001 |
| TNKS2     | 1.0691004 |
| TNPO1     | 1.5462284 |
| TNPO3     | 2.4955597 |
| TNRC6B    | 0.7901716 |
| TOB2      | 1.6544552 |
| TOE1      | 1.2203119 |
| TOLLIP    | 1.3194857 |
| TOM1      | 1.3973651 |
| TOM1L1    | 1.1387281 |
| TOM1L2    | 1.2248645 |
| TOMM20    | 1.7976322 |
| TOMM34    | 1.1335382 |
| TOMM5     | 1.0584111 |
| TOMM6     | 2.034752  |
| TOMM7     | 1.4947457 |
| TOP1      | 1.7973142 |
| TOP3A     | 1.3044729 |
| TOP3B     | 0.8813443 |
| TOPORS    | 1.8956604 |
| TOR1A     | 2.0542812 |
| TOR1AIP1  | 1.345665  |
| TOR1B     | 1.0621986 |
| TOX       | 1.6915517 |
| TOX4      | 1.8718648 |
| TPD52     | 1.9366488 |

|          |            |
|----------|------------|
| TPD52L2  | 1.352447   |
| TPP1     | 1.5439091  |
| TPP2     | 1.2883339  |
| TPR      | 0.70612144 |
| TPRN     | 0.8578718  |
| TPST2    | 0.8653388  |
| TPT1     | 1.3233261  |
| TRA2A    | 2.1080737  |
| TRADD    | 1.3656964  |
| TRAF1    | 2.0761452  |
| TRAF2    | 2.5938106  |
| TRAF3    | 1.5550995  |
| TRAF6    | 1.6272502  |
| TRAFD1   | 1.9984851  |
| TRAK2    | 1.5533118  |
| TRAPPC10 | 1.3651037  |
| TRAPPC13 | 1.8490715  |
| TRAPPC2  | 0.7430625  |
| TRAPPC2L | 0.99523973 |
| TRAPPC4  | 1.5318065  |
| TRAPPC6A | 1.0893741  |
| TRAPPC6B | 1.8389006  |
| TRAPPC8  | 1.015657   |
| TREM1    | 2.0194473  |
| TREM3    | 2.7372956  |
| TREML4   | 0.7684288  |
| TREX1    | 2.7549334  |
| TRIAP1   | 0.93081427 |
| TRIB1    | 3.381733   |
| TRIM11   | 1.7432904  |
| TRIM12A  | 1.6998563  |
| TRIM12C  | 1.5444522  |
| TRIM14   | 1.8352976  |
| TRIM2    | 1.4422307  |
| TRIM21   | 1.7727466  |
| TRIM23   | 1.3754668  |
| TRIM24   | 2.281971   |
| TRIM25   | 1.6859136  |
| TRIM26   | 0.93673944 |
| TRIM27   | 2.3085666  |
| TRIM28   | 1.4729004  |
| TRIM3    | 0.8801155  |
| TRIM30A  | 2.5570407  |
| TRIM30B  | 1.9247203  |
| TRIM30D  | 3.0065908  |

|          |            |
|----------|------------|
| TRIM33   | 1.0350633  |
| TRIM34A  | 1.5514116  |
| TRIM34B  | 1.6645079  |
| TRIM41   | 1.5544677  |
| TRIM43C  | 0.7427752  |
| TRIM46   | 0.73321176 |
| TRIM47   | 1.9420972  |
| TRIM5    | 1.3364165  |
| TRIM56   | 1.7971921  |
| TRIM8    | 1.3192635  |
| TRIO     | 1.0237579  |
| TRIOBP   | 1.1668363  |
| TRIP10   | 1.8372588  |
| TRIP11   | 1.5002551  |
| TRIP13   | 1.0062168  |
| TRIP4    | 1.3231816  |
| TRIP6    | 1.8839488  |
| TRMT11   | 1.450273   |
| TRMT112  | 1.489963   |
| TRMT13   | 1.0391922  |
| TRMT1L   | 1.8636427  |
| TRMT2A   | 1.861671   |
| TRMT2B   | 1.0090885  |
| TRMT61A  | 3.5188708  |
| TRNAU1AP | 1.6241007  |
| TRNT1    | 1.7708101  |
| TRP53BP1 | 1.5572064  |
| TRP63    | 1.0970373  |
| TRPC4AP  | 1.7588911  |
| TRRAP    | 0.8104441  |
| TSC1     | 1.2438545  |
| TSEN54   | 1.8781705  |
| TSG101   | 1.5492358  |
| TSN      | 1.2813287  |
| TSNAX    | 1.3881402  |
| TSPAN14  | 1.2022128  |
| TSPAN4   | 2.317183   |
| TSPYL1   | 0.89508724 |
| TSR2     | 1.1792326  |
| TSR3     | 1.7223496  |
| TSTD2    | 1.8981867  |
| TTBK2    | 1.1649451  |
| TTC1     | 2.0657816  |
| TTC14    | 1.004899   |
| TTC17    | 1.5238934  |



|          |            |
|----------|------------|
| TTC27    | 1.4133253  |
| TTC30A1  | 1.1109672  |
| TTC33    | 1.0465698  |
| TTC38    | 1.6445384  |
| TTC4     | 1.2102389  |
| TTC7B    | 0.89201593 |
| TTC9C    | 1.5966463  |
| TTF2     | 0.78982306 |
| TTI1     | 1.6568556  |
| TTPAL    | 2.2745423  |
| TUBA4A   | 1.7914824  |
| TUBA-RS1 | 1.0136137  |
| TUBB4A   | 0.9066925  |
| TUBB4B   | 1.3622222  |
| TUBB5    | 1.1380091  |
| TUBB6    | 2.5082555  |
| TUBGCP2  | 0.90590715 |
| TUBGCP3  | 1.5469351  |
| TUBGCP4  | 1.3719769  |
| TUG1     | 1.1329236  |
| TWF1     | 1.8884034  |
| TXN1     | 2.0734143  |
| TXNDC11  | 2.159667   |
| TXNDC12  | 1.6393309  |
| TXNDC17  | 1.3202968  |
| TXNDC9   | 1.6329322  |
| TXNL4B   | 1.1536255  |
| TYMS-PS  | 1.1517015  |
| TYW5     | 1.4066219  |
| U2AF1    | 1.809895   |
| U2SURP   | 0.6913624  |
| UAP1     | 2.770893   |
| UBA2     | 1.1470089  |
| UBA3     | 1.0426786  |
| UBA52    | 1.3825016  |
| UBA6     | 1.6794024  |
| UBA7     | 1.1401172  |
| UBAC1    | 0.9533849  |
| UBALD2   | 1.3237491  |
| UBAP1    | 1.9356985  |
| UBAP2    | 1.0808172  |
| UBAP2L   | 0.7045312  |
| UBB      | 1.5313787  |
| UBC      | 1.7937193  |
| UBD      | 3.5077682  |

|         |           |
|---------|-----------|
| UBE2A   | 1.3462362 |
| UBE2B   | 1.8191938 |
| UBE2D1  | 0.9421439 |
| UBE2D2A | 1.4612966 |
| UBE2D3  | 2.3440995 |
| UBE2E1  | 1.334765  |
| UBE2F   | 2.7897396 |
| UBE2G1  | 1.4485593 |
| UBE2G2  | 1.6205816 |
| UBE2H   | 0.705966  |
| UBE2I   | 0.9876461 |
| UBE2J2  | 1.7608991 |
| UBE2K   | 1.5184479 |
| UBE2L3  | 1.6968427 |
| UBE2L6  | 2.1393943 |
| UBE2M   | 1.4728146 |
| UBE2N   | 1.4129109 |
| UBE2O   | 0.8407712 |
| UBE2Q1  | 1.2282295 |
| UBE2Q2  | 1.5562496 |
| UBE2W   | 1.3475575 |
| UBE2Z   | 1.6689296 |
| UBE3A   | 1.5471063 |
| UBE3B   | 0.9919696 |
| UBE3C   | 1.4691715 |
| UBIAD1  | 1.5751367 |
| UBL5    | 1.3621144 |
| UBLCP1  | 1.4066892 |
| UBN1    | 1.827796  |
| UBP1    | 1.6404057 |
| UBQLN1  | 2.012889  |
| UBQLN2  | 1.0927792 |
| UBR2    | 1.3566384 |
| UBR4    | 1.9173722 |
| UBR5    | 1.3888245 |
| UBR7    | 1.5959401 |
| UBTD1   | 1.44027   |
| UBTF    | 2.1253266 |
| UBXN1   | 1.8260255 |
| UBXN2A  | 1.2422924 |
| UBXN2B  | 1.2782266 |
| UBXN6   | 1.5210567 |
| UBXN7   | 0.9982791 |
| UCHL4   | 1.9490566 |
| UCHL5   | 1.7834849 |

|           |            |
|-----------|------------|
| UCK1      | 1.9186277  |
| UCK2      | 2.5497055  |
| UCKL1     | 1.5062494  |
| UFD1L     | 2.2660046  |
| UGCG      | 3.1903234  |
| UGGT1     | 2.5052238  |
| UHMK1     | 0.83321524 |
| UHRF1BP1L | 1.5477233  |
| UHRF2     | 2.0741892  |
| ULK2      | 1.0993581  |
| ULK3      | 1.6283722  |
| UMPS      | 2.1923976  |
| UNC119B   | 3.2207756  |
| UNC45A    | 1.6267633  |
| UNC93B1   | 1.6378069  |
| UNG       | 1.8495474  |
| UNK       | 2.6073852  |
| UNKL      | 0.87213516 |
| UPF1      | 0.85154486 |
| UPF3A     | 1.2244287  |
| UPF3B     | 1.3837328  |
| UQCC2     | 1.5014801  |
| UQCRB     | 2.2559743  |
| URB1      | 1.8187037  |
| URB2      | 2.1839218  |
| URGCP     | 1.4023223  |
| URI1      | 0.915241   |
| USE1      | 1.0677328  |
| USF1      | 0.9820154  |
| USP1      | 1.295424   |
| USP10     | 2.1291866  |
| USP12     | 1.3132992  |
| USP14     | 2.7102113  |
| USP15     | 1.5739794  |
| USP16     | 2.3306856  |
| USP17LA   | 1.1491256  |
| USP18     | 3.0897045  |
| USP19     | 1.7614222  |
| USP21     | 1.0735517  |
| USP22     | 0.8098812  |
| USP24     | 1.3667881  |
| USP25     | 1.5226612  |
| USP3      | 1.2621408  |
| USP30     | 1.5595784  |
| USP31     | 0.9343157  |

|          |            |
|----------|------------|
| USP32    | 1.6141133  |
| USP33    | 1.2097082  |
| USP38    | 2.2539334  |
| USP39    | 0.89926815 |
| USP4     | 1.6031637  |
| USP42    | 1.3504152  |
| USP45    | 0.880321   |
| USP47    | 0.96481276 |
| USP48    | 1.2379751  |
| USP53    | 2.3649616  |
| USP7     | 1.4366822  |
| USP9X    | 1.3270879  |
| USPL1    | 2.2779803  |
| UTP11L   | 2.0457702  |
| UTP14A   | 0.8842468  |
| UTP15    | 1.2281199  |
| UTP23    | 2.4206257  |
| UTP3     | 1.8198233  |
| UTP6     | 1.4069877  |
| VAMP4    | 1.1759987  |
| VAPA     | 1.800252   |
| VAPB     | 1.4850507  |
| VARS     | 2.3491054  |
| VASH1    | 1.0981112  |
| VASN     | 0.7568197  |
| VASP     | 2.3511057  |
| VAV1     | 1.7400427  |
| VBP1     | 1.3029485  |
| VCAM1    | 3.0385032  |
| VCAN     | 1.5526147  |
| VCPIP1   | 1.9382691  |
| VCPKMT   | 1.626297   |
| VDAC1    | 1.0752621  |
| VDAC3    | 1.4938688  |
| VEGFC    | 1.8104982  |
| VILL     | 1.4979763  |
| VIMP     | 2.3105364  |
| VIPAS39  | 1.0958834  |
| VMN1R173 | 1.4029808  |
| VMN1R195 | 0.7614212  |
| VMN1R197 | 1.3871782  |
| VMN1R52  | 1.9533229  |
| VMP1     | 2.6976814  |
| VNN1     | 2.1158237  |
| VPS11    | 1.0918717  |

|         |            |
|---------|------------|
| VPS13B  | 1.0377679  |
| VPS16   | 1.7035651  |
| VPS18   | 1.6051378  |
| VPS25   | 1.6423745  |
| VPS26A  | 1.4308825  |
| VPS26B  | 1.0060983  |
| VPS28   | 1.4372911  |
| VPS29   | 1.3533807  |
| VPS33B  | 1.4803023  |
| VPS35   | 1.6107264  |
| VPS37B  | 1.9907784  |
| VPS39   | 0.84667635 |
| VPS45   | 1.1157441  |
| VPS4B   | 1.931499   |
| VPS52   | 1.4210382  |
| VPS54   | 0.8992162  |
| VRK2    | 1.1710944  |
| VRK3    | 2.0206356  |
| VTA1    | 1.8367858  |
| VTI1B   | 1.7699308  |
| VWA5A   | 1.3283     |
| VWA9    | 1.2995038  |
| WAC     | 1.2615385  |
| WAPAL   | 1.8143067  |
| WARS    | 1.8668184  |
| WARS2   | 1.4631195  |
| WASH    | 0.8905711  |
| WASL    | 1.6624813  |
| WBP11   | 1.9091496  |
| WBP2    | 1.4249368  |
| WBP5    | 0.954124   |
| WBSCR16 | 2.404285   |
| WDFY3   | 1.382215   |
| WDR1    | 2.3326874  |
| WDR11   | 1.2727559  |
| WDR12   | 1.8763056  |
| WDR26   | 1.9320474  |
| WDR3    | 1.9681139  |
| WDR31   | 2.029828   |
| WDR33   | 1.3757062  |
| WDR34   | 2.26154    |
| WDR36   | 1.8862448  |
| WDR4    | 2.2859402  |
| WDR43   | 1.8031721  |
| WDR44   | 0.8405571  |

|         |            |
|---------|------------|
| WDR45   | 1.054224   |
| WDR46   | 1.8997598  |
| WDR5    | 1.6638517  |
| WDR53   | 1.7096901  |
| WDR55   | 2.239068   |
| WDR59   | 1.5885715  |
| WDR73   | 1.2826595  |
| WDR75   | 1.4375758  |
| WDR81   | 1.5658207  |
| WDR82   | 1.3590012  |
| WDR83OS | 1.46275    |
| WDR89   | 1.878593   |
| WDR92   | 3.3338227  |
| WDYHV1  | 1.484932   |
| WFDC17  | 4.0040154  |
| WFDC18  | 2.641819   |
| WHAMM   | 2.184979   |
| WHSC1L1 | 1.3949742  |
| WIPF2   | 2.085936   |
| WIZ     | 1.3671126  |
| WNT5B   | 1.0039983  |
| WNT6    | 1.8644385  |
| WRAP73  | 1.5432348  |
| WRNIP1  | 2.0803924  |
| WSB1    | 2.2453198  |
| WTAP    | 1.6903629  |
| WWP2    | 1.5140352  |
| XAB2    | 1.1278381  |
| XAF1    | 1.9998665  |
| XBP1    | 2.7844763  |
| XCL1    | 2.6321077  |
| XDH     | 3.2347255  |
| XIAP    | 1.23732    |
| XKR8    | 2.1738133  |
| XLR3B   | 1.2928498  |
| XPA     | 1.5998325  |
| XPNPEP1 | 1.517549   |
| XPO4    | 1.4942579  |
| XPO6    | 1.7997603  |
| XPOT    | 1.3938651  |
| XPR1    | 0.96308184 |
| XRCC4   | 1.0573726  |
| XRCC6   | 1.52875    |
| XRN1    | 0.97802687 |
| XRN2    | 1.3384814  |

|         |            |
|---------|------------|
| YAF2    | 1.0523033  |
| YAP1    | 1.051157   |
| YBX1    | 1.0181704  |
| YBX3    | 1.3532243  |
| YES1    | 1.8413064  |
| YIF1B   | 1.2853727  |
| YIPF1   | 1.2034631  |
| YIPF4   | 1.5936275  |
| YIPF6   | 1.0223336  |
| YJEFN3  | 0.9936092  |
| YKT6    | 1.1302676  |
| YME1L1  | 2.6339808  |
| YPEL5   | 0.8943758  |
| YTHDC1  | 1.4557385  |
| YTHDC2  | 1.7098715  |
| YTHDF1  | 1.6693773  |
| YTHDF2  | 1.4325447  |
| YTHDF3  | 1.8364811  |
| YWHAB   | 1.4469638  |
| YWHAE   | 1.7234383  |
| YWHAG   | 1.4727745  |
| YWHAH   | 1.4924831  |
| YWHAQ   | 0.9771638  |
| YWHAZ   | 1.192666   |
| YY1     | 1.6610146  |
| ZADH2   | 1.0523052  |
| ZBED6   | 1.2972455  |
| ZBP1    | 2.7112694  |
| ZBTB11  | 0.73485327 |
| ZBTB12  | 1.4452891  |
| ZBTB16  | 3.0085812  |
| ZBTB17  | 0.873132   |
| ZBTB18  | 0.7467041  |
| ZBTB20  | 2.0489058  |
| ZBTB24  | 1.4796352  |
| ZBTB25  | 0.8612857  |
| ZBTB33  | 1.5584302  |
| ZBTB39  | 1.3594449  |
| ZBTB40  | 1.9420733  |
| ZBTB43  | 1.3450618  |
| ZBTB5   | 0.9238992  |
| ZBTB6   | 0.94647074 |
| ZBTB7B  | 1.030848   |
| ZC2HC1C | 1.3173671  |
| ZC3H11A | 2.0122423  |

|           |            |
|-----------|------------|
| ZC3H12A   | 2.07308    |
| ZC3H12C   | 1.3087819  |
| ZC3H15    | 2.1022825  |
| ZC3H18    | 1.8103628  |
| ZC3H3     | 1.7404795  |
| ZC3H4     | 0.7721081  |
| ZC3H7A    | 2.3576717  |
| ZC3HAV1   | 1.8753595  |
| ZC3HC1    | 0.9693551  |
| ZCCHC10   | 1.1988926  |
| ZCCHC17   | 1.4442897  |
| ZCCHC2    | 1.918262   |
| ZCCHC6    | 1.380022   |
| ZCCHC7    | 1.6157522  |
| ZCCHC8    | 1.8685215  |
| ZCCHC9    | 1.8840456  |
| ZCRB1     | 1.6502771  |
| ZDHHC13   | 1.9189548  |
| ZDHHC16   | 1.5118032  |
| ZDHHC17   | 1.2270851  |
| ZDHHC2    | 1.3659039  |
| ZDHHC21   | 1.0062613  |
| ZDHHC24   | 0.6463022  |
| ZDHHC5    | 1.6540508  |
| ZDHHC7    | 1.2843995  |
| ZFAND1    | 0.92034197 |
| ZFAND2B   | 1.6400347  |
| ZFAND3    | 1.2195606  |
| ZFAND4    | 2.2472866  |
| ZFAND5    | 1.1995792  |
| ZFAND6    | 1.8077059  |
| ZFAT      | 1.160018   |
| ZFC3H1    | 2.1431313  |
| ZFML      | 1.3008122  |
| ZFP1      | 1.069664   |
| ZFP106    | 1.2898998  |
| ZFP110    | 1.9128032  |
| ZFP119B   | 1.2924604  |
| ZFP120    | 0.84099054 |
| ZFP131    | 1.9523377  |
| ZFP133-PS | 1.3856487  |
| ZFP14     | 1.2158632  |
| ZFP148    | 0.8759594  |
| ZFP180    | 2.4058747  |
| ZFP191    | 0.995224   |



|         |            |
|---------|------------|
| ZFP202  | 1.7226701  |
| ZFP207  | 1.5409751  |
| ZFP212  | 0.9989953  |
| ZFP213  | 1.4760518  |
| ZFP236  | 2.8541422  |
| ZFP26   | 0.83993626 |
| ZFP260  | 1.4072285  |
| ZFP263  | 2.2819424  |
| ZFP275  | 2.0361466  |
| ZFP276  | 1.4724498  |
| ZFP277  | 0.77884054 |
| ZFP280B | 1.3032832  |
| ZFP280D | 0.85981226 |
| ZFP281  | 2.212069   |
| ZFP292  | 1.539321   |
| ZFP316  | 0.6812072  |
| ZFP317  | 1.3004639  |
| ZFP319  | 0.8171277  |
| ZFP326  | 1.4327407  |
| ZFP330  | 3.0767465  |
| ZFP335  | 2.0438123  |
| ZFP341  | 1.286037   |
| ZFP35   | 1.206419   |
| ZFP36   | 4.7424855  |
| ZFP367  | 0.75439    |
| ZFP36L1 | 1.9374518  |
| ZFP384  | 1.7155585  |
| ZFP397  | 2.0544446  |
| ZFP407  | 1.1585307  |
| ZFP408  | 1.3745394  |
| ZFP410  | 1.8027744  |
| ZFP426  | 1.3302336  |
| ZFP429  | 2.3819933  |
| ZFP433  | 1.9031496  |
| ZFP445  | 1.1018357  |
| ZFP446  | 1.4273589  |
| ZFP451  | 0.9371362  |
| ZFP457  | 1.2368546  |
| ZFP458  | 1.9271829  |
| ZFP488  | 1.849885   |
| ZFP51   | 0.89598846 |
| ZFP511  | 1.0850635  |
| ZFP512  | 1.0525784  |
| ZFP513  | 1.966124   |
| ZFP518A | 0.79452634 |

|         |           |
|---------|-----------|
| ZFP518B | 0.9460993 |
| ZFP524  | 0.8102913 |
| ZFP53   | 1.0453508 |
| ZFP553  | 0.6944752 |
| ZFP566  | 0.9641938 |
| ZFP574  | 1.0635738 |
| ZFP58   | 0.9744587 |
| ZFP592  | 1.409791  |
| ZFP593  | 1.8179603 |
| ZFP597  | 0.8732538 |
| ZFP62   | 1.1194334 |
| ZFP622  | 1.4235287 |
| ZFP626  | 0.8550401 |
| ZFP628  | 1.2519917 |
| ZFP639  | 1.2186294 |
| ZFP653  | 1.5870414 |
| ZFP655  | 1.846734  |
| ZFP658  | 1.6574783 |
| ZFP668  | 1.4119258 |
| ZFP68   | 0.778656  |
| ZFP687  | 1.073895  |
| ZFP691  | 2.3639297 |
| ZFP706  | 1.0771213 |
| ZFP708  | 1.0408261 |
| ZFP709  | 1.2122769 |
| ZFP719  | 0.8394027 |
| ZFP747  | 1.1207213 |
| ZFP748  | 1.2641315 |
| ZFP758  | 0.73436   |
| ZFP770  | 1.3088632 |
| ZFP777  | 1.1566    |
| ZFP791  | 2.0599947 |
| ZFP800  | 2.2036812 |
| ZFP809  | 2.4233017 |
| ZFP830  | 1.3622022 |
| ZFP865  | 0.801327  |
| ZFP867  | 0.9897094 |
| ZFP868  | 1.8216014 |
| ZFP869  | 1.4191647 |
| ZFP87   | 0.9673891 |
| ZFP871  | 1.3674264 |
| ZFP91   | 1.0432849 |
| ZFP931  | 1.4754472 |
| ZFP935  | 0.8162401 |
| ZFP937  | 0.7133491 |

|          |            |
|----------|------------|
| ZFP943   | 1.0742264  |
| ZFP947   | 1.1280355  |
| ZFP954   | 1.5866618  |
| ZFP955A  | 1.2854781  |
| ZFP959   | 1.7240252  |
| ZFP960   | 0.9338093  |
| ZFP963   | 1.7226181  |
| ZFR      | 1.1119862  |
| ZFYVE16  | 1.2126594  |
| ZFYVE20  | 1.4459171  |
| ZFYVE26  | 2.0862236  |
| ZFYVE27  | 1.1344166  |
| ZHX1     | 1.2835116  |
| ZHX2     | 0.8335812  |
| ZHX3     | 0.85367346 |
| ZIK1     | 1.0388987  |
| ZKSCAN17 | 1.1602836  |
| ZKSCAN3  | 1.627665   |
| ZKSCAN6  | 1.7746677  |
| ZMAT1    | 1.36355    |
| ZMAT2    | 1.7752657  |
| ZMPSTE24 | 1.3873482  |
| ZMYM1    | 0.8737583  |
| ZMYM2    | 0.7626128  |
| ZMYND15  | 2.043939   |
| ZMYND19  | 1.8272476  |
| ZNFX1    | 2.186956   |
| ZNHIT1   | 1.9458413  |
| ZNHIT3   | 0.72243905 |
| ZNHIT6   | 1.2559352  |
| ZNRD1    | 1.6157227  |
| ZNRF1    | 2.9873724  |
| ZNRF2    | 1.4767616  |
| ZPR1     | 2.5355244  |
| ZRANB1   | 1.6367064  |
| ZRANB2   | 1.866879   |
| ZSCAN21  | 1.283256   |
| ZSCAN22  | 1.9661529  |
| ZSWIM7   | 1.9825897  |
| ZSWIM8   | 1.4405146  |
| ZUFSP    | 2.285717   |
| ZW10     | 1.9599695  |
| ZWINT    | 2.5599804  |
| ZYG11B   | 1.2889154  |
| ZYX      | 2.2785459  |

|       |           |
|-------|-----------|
| ZZEF1 | 1.1583748 |
| ZZZ3  | 1.2515526 |

**Mice\_onset\_liver\_DEgenes\_fc**

| <b>Gene</b> | <b>Log2 Fold Change</b> |
|-------------|-------------------------|
| A4GNT       | -7.1721334              |
| AADACL3     | -2.5918586              |
| AADAT       | -2.5883238              |
| AAMDC       | -1.6425028              |
| AARD        | -4.5775533              |
| AARS2       | -0.5318263              |
| ABCA12      | -6.1048613              |
| ABCA13      | -1.700203               |
| ABCA16      | -2.4572964              |
| ABCA2       | -1.2202282              |
| ABCA3       | -0.7845552              |
| ABCA4       | -2.7949917              |
| ABCA8A      | -4.442295               |
| ABCA9       | -3.19486                |
| ABCB1A      | -0.5779545              |
| ABCB9       | -0.6662781              |
| ABCC12      | -3.3919325              |
| ABCC8       | -0.4221308              |
| ABCD1       | -0.6747162              |
| ABCG1       | -0.981549               |
| ABCG3       | -3.6526644              |
| ABHD12B     | -2.655893               |
| ABHD14A     | -0.7749364              |
| ABHD16B     | -1.3454797              |
| ABHD8       | -1.5175226              |
| ABI3BP      | -0.8579376              |
| ABLIM1      | -1.1606433              |
| ABLIM2      | -3.4791985              |
| ABLIM3      | -1.9150407              |
| ABT1        | -3.0353274              |
| ACAD8       | -0.7712364              |
| ACAN        | -1.651398               |
| ACAP1       | -1.1893699              |
| ACBD7       | -4.5162096              |
| ACE         | -5.511085               |
| ACE2        | -4.521343               |
| ACER1       | -3.4636478              |
| ACHE        | -2.8503542              |
| ACKR2       | -0.8712266              |
| ACKR3       | -0.5381229              |
| ACOT5       | -3.9363332              |
| ACOT7       | -1.1045415              |
| ACOXL       | -6.1037474              |

|          |            |
|----------|------------|
| ACPT     | -5.0255356 |
| ACR      | -5.359834  |
| ACSBG1   | -1.5680976 |
| ACSBG2   | -5.232827  |
| ACSL6    | -2.7221541 |
| ACSM4    | -2.3473594 |
| ACSS1    | -4.1672573 |
| ACSS2    | -2.4577317 |
| ACSS3    | -2.519436  |
| ACTA1    | -4.258929  |
| ACTA2    | -3.274879  |
| ACTC1    | -8.959878  |
| ACTG2    | -3.956104  |
| ACTL7A   | -2.1444714 |
| ACTL7B   | -5.0445423 |
| ACTL9    | -2.315448  |
| ACTN2    | -4.289836  |
| ACTRT2   | -3.656799  |
| ACVRL1   | -1.981209  |
| ACYP2    | -2.150041  |
| ADAD1    | -0.8254104 |
| ADAD2    | -2.4817972 |
| ADAM12   | -2.9601274 |
| ADAM15   | -1.1641252 |
| ADAM18   | -5.0059986 |
| ADAM19   | -1.7461994 |
| ADAM1A   | -2.1704774 |
| ADAM2    | -2.5063627 |
| ADAM21   | -2.2826123 |
| ADAM22   | -3.1781778 |
| ADAM24   | -1.9484129 |
| ADAM25   | -2.269978  |
| ADAM26A  | -2.4195964 |
| ADAM26B  | -2.1253557 |
| ADAM28   | -4.1507072 |
| ADAM30   | -2.5216157 |
| ADAM32   | -0.9222832 |
| ADAM33   | -2.7365053 |
| ADAM39   | -3.9378715 |
| ADAM4    | -0.866117  |
| ADAM6B   | -1.9819431 |
| ADAMTS10 | -3.4872773 |
| ADAMTS12 | -2.7158115 |
| ADAMTS15 | -1.5187237 |
| ADAMTS16 | -3.7151728 |

|           |            |
|-----------|------------|
| ADAMTS17  | -3.82005   |
| ADAMTS18  | -2.7695076 |
| ADAMTS2   | -1.0271919 |
| ADAMTS3   | -1.9184418 |
| ADAMTS5   | -3.624414  |
| ADAMTS6   | -0.9465599 |
| ADAMTS8   | -3.815812  |
| ADAMTSL2  | -2.5277789 |
| ADAMTSL4  | -1.1381044 |
| ADAMTSL5  | -2.3007212 |
| ADARB1    | -0.3730657 |
| ADARB2    | -1.762188  |
| ADC       | -4.109031  |
| ADCY10    | -2.6450512 |
| ADCY2     | -3.454515  |
| ADCY3     | -4.416996  |
| ADCY4     | -2.012739  |
| ADCY5     | -3.524454  |
| ADCY6     | -1.1928179 |
| ADCY7     | -0.9072526 |
| ADCY8     | -6.7777796 |
| ADCYAP1R1 | -1.8873262 |
| ADD3      | -1.9688776 |
| ADGB      | -1.1905732 |
| ADH6A     | -2.5270448 |
| ADIG      | -2.53751   |
| ADIPOQ    | -5.9006653 |
| ADORA2B   | -1.1609132 |
| ADORA3    | -1.080363  |
| ADPRHL1   | -2.9902604 |
| ADRA1A    | -1.8936701 |
| ADRA1D    | -4.2822742 |
| ADRA2B    | -2.513542  |
| ADRA2C    | -2.328401  |
| ADRB1     | -2.9855003 |
| ADRB3     | -1.9543154 |
| AEBP1     | -1.3866374 |
| AFAP1     | -1.9291096 |
| AFAP1L1   | -3.2402377 |
| AFAP1L2   | -1.4428515 |
| AFF3      | -2.0694034 |
| AGAP1     | -0.4053133 |
| AGAP2     | -0.91869   |
| AGBL2     | -3.9932044 |
| AGBL4     | -4.3466206 |

|          |            |
|----------|------------|
| AGBL5    | -1.2718    |
| AGER     | -10.061924 |
| AGO1     | -0.8035069 |
| AGPAT4   | -1.3973658 |
| AGR2     | -5.366805  |
| AGR3     | -5.552376  |
| AGRN     | -0.8635323 |
| AGRP     | -4.252938  |
| AGTPBP1  | -0.7590792 |
| AGTR2    | -2.907146  |
| AHDC1    | -0.8827338 |
| AHI1     | -1.5139908 |
| AHNAK    | -3.5933628 |
| AHRR     | -2.0566    |
| AHSA2    | -2.3372838 |
| AHSP     | -2.8827393 |
| AICDA    | -2.9806683 |
| AIF1L    | -3.5759156 |
| AIFM3    | -2.345757  |
| AIM1L    | -2.7996223 |
| AIRE     | -2.9279773 |
| AJAP1    | -3.0845852 |
| AJUBA    | -4.0599365 |
| AK1      | -3.5757005 |
| AK8      | -4.198618  |
| AKAP14   | -2.5529687 |
| AKAP17B  | -1.4357972 |
| AKAP3    | -3.7793388 |
| AKAP5    | -9.191523  |
| AKNA     | -0.3232935 |
| AKR1B3   | -1.0651515 |
| AKR1C14  | -2.6648357 |
| AKR1D1   | -1.6376    |
| AKT3     | -1.0091045 |
| ALAS2    | -0.6509583 |
| ALDH1A1  | -2.5113184 |
| ALDH1A2  | -3.2956219 |
| ALDH1A7  | -1.3843019 |
| ALDH3A1  | -1.8346407 |
| ALDH3A2  | -0.278157  |
| ALDH3B1  | -1.0035002 |
| ALDOART1 | -4.230694  |
| ALDOART2 | -2.3045826 |
| ALMS1    | -4.822544  |
| ALOX12B  | -3.3455446 |



|          |            |
|----------|------------|
| ALOX12E  | -1.5040584 |
| ALOX15   | -4.5697784 |
| ALOX5    | -2.7408578 |
| ALOX5AP  | -0.7194297 |
| ALOXE3   | -2.2014256 |
| ALPK2    | -4.1470156 |
| ALPK3    | -2.9846673 |
| ALX3     | -2.2145789 |
| AMBN     | -4.892886  |
| AMER2    | -0.8259077 |
| AMHR2    | -3.880726  |
| AMOTL1   | -0.5492547 |
| AMOTL2   | -2.1709454 |
| AMPH     | -5.9595685 |
| AMT      | -2.6192195 |
| AMTN     | -2.7584357 |
| AMZ1     | -1.4630396 |
| ANGEL1   | -1.1930969 |
| ANGPT1   | -5.6773996 |
| ANGPT4   | -3.2260067 |
| ANGPTL1  | -4.226357  |
| ANGPTL7  | -2.9425707 |
| ANK2     | -2.267811  |
| ANK3     | -2.269581  |
| ANKEF1   | -2.2529716 |
| ANKFN1   | -4.2032228 |
| ANKLE1   | -3.4781203 |
| ANKMY2   | -0.8815424 |
| ANKRD1   | -1.7032721 |
| ANKRD12  | -0.7015178 |
| ANKRD29  | -3.924153  |
| ANKRD33  | -3.7023792 |
| ANKRD33B | -0.9203396 |
| ANKRD34A | -5.1719227 |
| ANKRD36  | -5.426233  |
| ANKRD42  | -2.2394688 |
| ANKRD44  | -1.9369125 |
| ANKRD45  | -0.3599179 |
| ANKRD50  | -0.8800814 |
| ANKRD53  | -2.0070703 |
| ANKRD55  | -1.9756813 |
| ANKRD6   | -3.9419866 |
| ANKRD60  | -3.9496784 |
| ANKRD61  | -1.7649052 |
| ANKRD63  | -3.944637  |

|         |            |
|---------|------------|
| ANKRD65 | -1.7329412 |
| ANKRD7  | -2.9979212 |
| ANKUB1  | -3.188878  |
| ANLN    | -1.5051606 |
| ANO1    | -2.7367191 |
| ANO3    | -3.986185  |
| ANO6    | -1.2777884 |
| ANO7    | -3.8124778 |
| ANO8    | -2.1942134 |
| ANO9    | -3.6124682 |
| ANTXR1  | -2.317818  |
| ANTXRL  | -0.5797393 |
| ANXA1   | -1.2978699 |
| ANXA10  | -3.8598697 |
| ANXA13  | -3.163598  |
| ANXA2   | -0.6346033 |
| ANXA3   | -1.6504824 |
| ANXA8   | -2.768167  |
| ANXA9   | -1.0714519 |
| AOC1    | -2.661462  |
| AOC3    | -2.1787167 |
| AOX3    | -4.420767  |
| AP1G2   | -1.9535947 |
| AP1M2   | -3.3301668 |
| AP1S2   | -0.5353117 |
| AP1S3   | -1.1773658 |
| AP3B2   | -3.19544   |
| APBA1   | -2.632963  |
| APBA2   | -2.624031  |
| APBB1   | -3.9158473 |
| APBB2   | -0.8698764 |
| APC     | -1.0059745 |
| APC2    | -1.7950506 |
| APCDD1  | -1.6946483 |
| APEX2   | -1.234365  |
| APLF    | -2.1272159 |
| APLN    | -5.2146006 |
| APLNR   | -7.5114365 |
| APOBEC4 | -1.1225386 |
| APOD    | -4.731511  |
| APOL10A | -3.4808807 |
| APOL11B | -3.012017  |
| APOL6   | -3.9931412 |
| APOL7D  | -1.7946396 |
| APTX    | -1.7037487 |

|            |            |
|------------|------------|
| AQP1       | -0.4767878 |
| AQP12      | -1.1479847 |
| AQP3       | -1.5618782 |
| AQP4       | -1.578085  |
| AQP5       | -7.9881296 |
| AQP6       | -4.176865  |
| ARAP3      | -0.9442351 |
| ARC        | -1.2010958 |
| ARHGAP15   | -1.6982608 |
| ARHGAP18   | -1.3605418 |
| ARHGAP20   | -3.12796   |
| ARHGAP20O! | -2.5734792 |
| ARHGAP22   | -1.4672713 |
| ARHGAP23   | -0.4960129 |
| ARHGAP27   | -3.7123928 |
| ARHGAP28   | -1.8589885 |
| ARHGAP31   | -1.2175915 |
| ARHGAP33   | -3.8877468 |
| ARHGAP33O! | -3.6821635 |
| ARHGAP40   | -3.4107363 |
| ARHGAP44   | -2.853748  |
| ARHGAP6    | -2.437663  |
| ARHGAP8    | -2.2476232 |
| ARHGAP9    | -0.6944001 |
| ARHGDIG    | -5.22362   |
| ARHGEF1    | -0.3850195 |
| ARHGEF17   | -3.3795927 |
| ARHGEF19   | -0.8187707 |
| ARHGEF25   | -3.1294534 |
| ARHGEF28   | -5.7627378 |
| ARHGEF33   | -2.3412273 |
| ARHGEF38   | -4.373337  |
| ARHGEF39   | -3.049125  |
| ARHGEF4    | -2.0704727 |
| ARHGEF6    | -1.6997502 |
| ARHGEF9    | -2.8047512 |
| ARID3B     | -0.4659028 |
| ARID3C     | -4.5027876 |
| ARL11      | -0.4570848 |
| ARL13A     | -2.4083476 |
| ARL14      | -1.3588204 |
| ARL14EPL   | -1.9117675 |
| ARL2       | -1.6829693 |
| ARL5C      | -0.7314813 |
| ARL9       | -0.6752191 |

|        |            |
|--------|------------|
| ARMC12 | -4.8724766 |
| ARMC2  | -2.4682245 |
| ARMC3  | -3.8337078 |
| ARMC4  | -4.7973146 |
| ARMC6  | -0.4671781 |
| ARMC9  | -2.054132  |
| ARMCX1 | -1.5966167 |
| ARMCX2 | -0.4369581 |
| ARMCX4 | -1.0334058 |
| ARMCX6 | -0.98967   |
| ARNT2  | -5.1374054 |
| ARPP21 | -3.4075952 |
| ARR3   | -1.3910093 |
| ARRB1  | -1.4871628 |
| ARRDC1 | -1.8546402 |
| ARRDC3 | -1.0825534 |
| ARRDC5 | -4.2557573 |
| ARSB   | -1.9031701 |
| ARSJ   | -3.016074  |
| ART1   | -2.8845425 |
| ART3   | -2.2449968 |
| ART4   | -4.7504954 |
| ART5   | -2.1881166 |
| ARV1   | -0.3369701 |
| ARVCF  | -2.6983452 |
| ARXES2 | -4.3292007 |
| ASAH2  | -0.4026485 |
| ASB1   | -0.4061589 |
| ASB10  | -6.344965  |
| ASB11  | -2.8298242 |
| ASB16  | -2.6331673 |
| ASB18  | -3.4040937 |
| ASB3   | -1.3393307 |
| ASB5   | -3.1320198 |
| ASB9   | -3.3421135 |
| ASCL3  | -3.1204672 |
| ASF1A  | -0.8892839 |
| ASF1B  | -0.7905235 |
| ASIC1  | -4.367959  |
| ASIC4  | -2.1935854 |
| ASIC5  | -0.5829511 |
| ASPHD1 | -0.8039408 |
| ASPHD2 | -3.156267  |
| ASPM   | -1.0373728 |
| ASTL   | -4.5695305 |

|          |            |
|----------|------------|
| ASTN2    | -6.2421703 |
| ASTX     | -5.725442  |
| ASXL3    | -2.686323  |
| ATAD2    | -1.8932288 |
| ATF7     | -1.8475931 |
| ATF7IP2  | -3.2935932 |
| ATG4A    | -1.4720745 |
| ATG9B    | -3.6955957 |
| ATMIN    | -0.3400986 |
| ATOH8    | -1.6313856 |
| ATP10A   | -1.2068341 |
| ATP13A4  | -4.5609593 |
| ATP13A5  | -2.523815  |
| ATP1A2   | -4.694298  |
| ATP1A3   | -1.2864087 |
| ATP1A4   | -2.8874419 |
| ATP1B2   | -3.4239805 |
| ATP2A1   | -0.376276  |
| ATP2A3   | -3.6901934 |
| ATP2B4   | -3.529076  |
| ATP2C1   | -0.3648694 |
| ATP2C2   | -0.9862495 |
| ATP6AP1L | -3.1298368 |
| ATP6V0D2 | -5.4191394 |
| ATP6V0E2 | -1.8323073 |
| ATP6V1B1 | -4.686256  |
| ATP6V1C2 | -6.9667997 |
| ATP6V1E2 | -2.9262204 |
| ATP6V1G2 | -1.1751385 |
| ATP6V1G3 | -2.654291  |
| ATP7B    | -1.3597782 |
| ATP8A2   | -4.1543207 |
| ATP8B3   | -2.9726288 |
| ATRNL1   | -0.5664427 |
| ATXN1    | -1.0016334 |
| ATXN7L3  | -0.4113801 |
| AWAT2    | -2.3813555 |
| B3GALT5  | -3.3677416 |
| B3GAT2   | -4.304005  |
| B3GLCT   | -0.9687789 |
| B3GNT3   | -5.0048904 |
| B3GNT4   | -1.2016809 |
| B3GNT5   | -2.2151027 |
| B3GNT7   | -3.940243  |
| B3GNT9   | -1.9561906 |

|          |            |
|----------|------------|
| B3GNTL1  | -1.1982374 |
| B4GALNT4 | -1.0175114 |
| B4GALT2  | -2.240263  |
| B4GALT4  | -2.668468  |
| B9D1     | -1.20452   |
| BACH2    | -1.2934968 |
| BAG2     | -2.7894871 |
| BAI1     | -5.5045094 |
| BAI2     | -2.3679295 |
| BAI3     | -3.3079078 |
| BAIAP2   | -0.4630048 |
| BAIAP3   | -5.5223284 |
| BANF2    | -2.6923234 |
| BANK1    | -1.6508944 |
| BARD1    | -1.2550218 |
| BARX1    | -2.6694572 |
| BARX2    | -1.1954515 |
| BAZ1B    | -1.7313807 |
| BBS1     | -0.478226  |
| BC021767 | -0.6342795 |
| BCAM     | -3.8687496 |
| BCAN     | -4.597036  |
| BCAS1    | -1.877173  |
| BCAS1OS2 | -1.7203975 |
| BCAS3    | -0.752512  |
| BCAT1    | -3.434213  |
| BCAT2    | -0.2530603 |
| BCL11B   | -3.7311869 |
| BCL2     | -0.7560213 |
| BCL2L12  | -0.9212942 |
| BCL6B    | -0.5948923 |
| BCL9L    | -1.9430611 |
| BCORL1   | -1.2192984 |
| BDH1     | -4.0151196 |
| BDKRB2   | -4.761613  |
| BDNF     | -3.7561316 |
| BE949265 | -2.3523433 |
| BEND4    | -2.0139685 |
| BEND6    | -1.9566729 |
| BEND7    | -0.9793859 |
| BEST1    | -2.2729716 |
| BEX1     | -2.8986166 |
| BEX2     | -1.0027969 |
| BEX4     | -1.6038611 |
| BEX6     | -4.9374523 |

|         |            |
|---------|------------|
| BFSP1   | -2.5923555 |
| BFSP2   | -1.9037917 |
| BGLAP   | -2.4514384 |
| BGN     | -1.548029  |
| BHLHA9  | -1.8496785 |
| BHLHB9  | -1.4029217 |
| BHLHE22 | -0.5607576 |
| BHLHE23 | -3.4383225 |
| BHLHE41 | -4.255904  |
| BICC1   | -1.0457532 |
| BIK     | -1.2935627 |
| BIN2    | -1.9122932 |
| BIRC5   | -0.7235808 |
| BLK     | -2.970181  |
| BLNK    | -1.6503694 |
| BMF     | -1.9106202 |
| BMP10   | -2.7384405 |
| BMP3    | -4.6660266 |
| BMP4    | -2.4188166 |
| BMP5    | -3.806571  |
| BMP6    | -1.9090426 |
| BMP7    | -4.1539583 |
| BMP8B   | -1.4249561 |
| BMPR2   | -1.0638506 |
| BMX     | -2.509581  |
| BMYC    | -0.6599209 |
| BNC1    | -1.8943877 |
| BNIPL   | -2.9547734 |
| BOC     | -4.2434134 |
| BOLA1   | -0.5789666 |
| BPGM    | -0.3855479 |
| BPI     | -3.2143326 |
| BPIFA1  | -6.5019846 |
| BPIFA2  | -3.3932157 |
| BPIFA3  | -3.3369908 |
| BPIFA5  | -2.365233  |
| BPIFA6  | -3.1000037 |
| BPIFB1  | -3.6400843 |
| BPIFB4  | -0.8980451 |
| BPIFB5  | -4.6745586 |
| BPIFB6  | -3.3301008 |
| BPIFB9B | -5.2891397 |
| BRF1    | -0.671046  |
| BRICD5  | -2.7438176 |
| BRINP1  | -2.2677932 |

|         |            |
|---------|------------|
| BRINP3  | -5.4585495 |
| BRS3    | -2.8918483 |
| BRSK1   | -0.6051555 |
| BRSK2   | -2.9353902 |
| BSN     | -2.3327038 |
| BSND    | -5.6617002 |
| BSPH1   | -2.6316228 |
| BSPRY   | -3.8958976 |
| BSX     | -3.6705112 |
| BTBD11  | -0.4511244 |
| BTBD2   | -0.5831945 |
| BTBD3   | -1.5670779 |
| BTBD8   | -1.1991131 |
| BTG4    | -2.9316466 |
| BTLA    | -2.1045935 |
| BTNL1   | -4.0505037 |
| BTRC    | -1.3533094 |
| BUB1    | -0.806201  |
| BUB1B   | -0.6335738 |
| BZRAP1  | -4.2965865 |
| C1D     | -1.2952633 |
| C1QL1   | -2.6876411 |
| C1QL2   | -4.314613  |
| C1QL4   | -5.635515  |
| C1QTNF2 | -4.6098814 |
| C1QTNF3 | -3.3100462 |
| C1QTNF4 | -3.6503408 |
| C1QTNF5 | -1.380343  |
| C1QTNF6 | -0.8477855 |
| C1QTNF7 | -3.8879855 |
| C2CD3   | -0.4152958 |
| C2CD4A  | -2.0623121 |
| C2CD4B  | -5.4838243 |
| C2CD4C  | -4.4398637 |
| C2CD4D  | -1.6001668 |
| C5AR2   | -0.3098347 |
| C6      | -0.7394724 |
| C7      | -3.2050884 |
| CABP2   | -2.7081552 |
| CABP4   | -2.2877722 |
| CACHD1  | -3.278361  |
| CACNA1A | -0.7867904 |
| CACNA1B | -3.0189157 |
| CACNA1C | -4.535331  |
| CACNA1D | -5.455304  |



|          |            |
|----------|------------|
| CACNA1E  | -4.9444942 |
| CACNA1F  | -1.2574404 |
| CACNA1H  | -0.8930416 |
| CACNA1I  | -3.819404  |
| CACNA1S  | -3.0649219 |
| CACNA2D1 | -2.2716856 |
| CACNA2D3 | -2.151605  |
| CACNA2D4 | -3.0450726 |
| CACNB1   | -1.4380215 |
| CACNB2   | -2.7665489 |
| CACNB3   | -2.1349125 |
| CACNB4   | -1.9296608 |
| CACNG1   | -3.8703244 |
| CACNG2   | -1.9706392 |
| CACNG4   | -2.5839317 |
| CACNG8   | -4.817683  |
| CADM1    | -1.0697734 |
| CADM3    | -1.4279401 |
| CALB1    | -4.001606  |
| CALB2    | -5.0267496 |
| CALCA    | -2.3070555 |
| CALCB    | -2.7581544 |
| CALCOCO1 | -1.0565    |
| CALCOCO2 | -4.6915236 |
| CALCR    | -2.659916  |
| CALCRL   | -4.5897226 |
| CALHM1   | -4.792267  |
| CALM4    | -3.4795473 |
| CALML3   | -3.6814857 |
| CALML4   | -1.1468513 |
| CALY     | -0.7960417 |
| CAMK1    | -1.0518208 |
| CAMK1G   | -2.512897  |
| CAMK2A   | -1.413291  |
| CAMKK2   | -0.5580194 |
| CAMKV    | -4.6115117 |
| CAMP     | -0.3803294 |
| CAMTA1   | -2.810702  |
| CAP2     | -2.2127235 |
| CAPN1    | -2.3665764 |
| CAPN12   | -0.9709878 |
| CAPN15   | -0.4541884 |
| CAPN2    | -0.4820063 |
| CAPN3    | -1.3332014 |
| CAPN5    | -3.801419  |

|           |            |
|-----------|------------|
| CAPN9     | -2.7103767 |
| CAPNS2    | -1.8188934 |
| CAPS2     | -3.199904  |
| CAPSL     | -4.1728477 |
| CAR1      | -2.8645246 |
| CAR10     | -2.0035853 |
| CAR14     | -0.7261238 |
| CAR15     | -1.1849816 |
| CAR2      | -1.8162086 |
| CAR3      | -0.798044  |
| CAR5B     | -1.4561677 |
| CAR6      | -4.6296673 |
| CARD11    | -2.7226787 |
| CARD9     | -2.2488403 |
| CARF      | -1.3278167 |
| CARLR     | -4.253886  |
| CARTPT    | -3.133894  |
| CASC1     | -2.4438362 |
| CASC4     | -0.4686303 |
| CASC5     | -1.7024968 |
| CASD1     | -0.2753272 |
| CASP12    | -1.783391  |
| CASP16    | -3.9830163 |
| CASP3     | -1.7718928 |
| CASQ1     | -3.1464937 |
| CASQ2     | -3.4347646 |
| CASZ1     | -0.8974705 |
| CATIP     | -1.9782951 |
| CATSPER1  | -2.028378  |
| CATSPER4  | -2.9663398 |
| CATSPERB  | -3.4444532 |
| CATSPERG1 | -1.4763288 |
| CAV1      | -5.3094597 |
| CAV2      | -5.2129755 |
| CAV3      | -4.326257  |
| CBFA2T3   | -3.248424  |
| CBLN1     | -1.5118098 |
| CBLN2     | -4.485105  |
| CBR2      | -12.63266  |
| CBR3      | -1.2772076 |
| CBX5      | -1.6772068 |
| CBX6      | -2.5936182 |
| CBY1      | -1.8525617 |
| CC2D2A    | -1.7360902 |
| CCBE1     | -1.4977648 |

|          |            |
|----------|------------|
| CCDC102A | -0.7032392 |
| CCDC103  | -1.8531625 |
| CCDC105  | -3.130529  |
| CCDC108  | -3.1817832 |
| CCDC109B | -2.2596633 |
| CCDC11   | -5.6829076 |
| CCDC110  | -2.296487  |
| CCDC112  | -2.8958764 |
| CCDC113  | -5.9360676 |
| CCDC114  | -0.6679218 |
| CCDC116  | -2.0017595 |
| CCDC121  | -4.153556  |
| CCDC122  | -1.9620183 |
| CCDC129  | -7.649254  |
| CCDC130  | -2.036723  |
| CCDC136  | -3.884502  |
| CCDC14   | -3.4824584 |
| CCDC141  | -3.1132598 |
| CCDC142  | -2.2161078 |
| CCDC146  | -1.8488448 |
| CCDC147  | -3.8156152 |
| CCDC149  | -2.2314615 |
| CCDC15   | -1.5682216 |
| CCDC150  | -2.4268963 |
| CCDC152  | -4.830906  |
| CCDC153  | -7.2733173 |
| CCDC154  | -2.3218565 |
| CCDC155  | -3.972136  |
| CCDC158  | -4.2128286 |
| CCDC162  | -1.0307395 |
| CCDC17   | -1.1409051 |
| CCDC171  | -2.2279985 |
| CCDC172  | -3.1943634 |
| CCDC176  | -1.8252239 |
| CCDC177  | -2.2281952 |
| CCDC18   | -2.224219  |
| CCDC183  | -3.097693  |
| CCDC185  | -3.954113  |
| CCDC19   | -3.6845198 |
| CCDC24   | -3.6441677 |
| CCDC27   | -6.5327826 |
| CCDC28B  | -0.3128083 |
| CCDC30   | -2.258757  |
| CCDC33   | -3.2769203 |
| CCDC34   | -3.2243698 |

|          |            |
|----------|------------|
| CCDC37   | -3.5351658 |
| CCDC39   | -2.87122   |
| CCDC40   | -4.9994392 |
| CCDC42   | -2.5706952 |
| CCDC42B  | -0.878464  |
| CCDC42OS | -4.8439794 |
| CCDC50   | -4.50473   |
| CCDC51   | -1.0825808 |
| CCDC54   | -2.3769422 |
| CCDC62   | -4.035125  |
| CCDC63   | -1.4475741 |
| CCDC64   | -1.1633658 |
| CCDC64B  | -3.1356936 |
| CCDC65   | -3.1577682 |
| CCDC67   | -1.853154  |
| CCDC7    | -1.8092413 |
| CCDC73   | -4.496309  |
| CCDC74A  | -2.4302518 |
| CCDC8    | -3.6031651 |
| CCDC83   | -2.653716  |
| CCDC85A  | -5.180965  |
| CCDC85B  | -3.0401566 |
| CCDC85C  | -1.0570164 |
| CCDC87   | -3.509605  |
| CCDC88C  | -0.8212667 |
| CCDC89   | -1.5490403 |
| CCDC92   | -4.009636  |
| CCHCR1   | -0.8950675 |
| CCKAR    | -6.166521  |
| CCL1     | -1.9592493 |
| CCL12    | -0.6425829 |
| CCL20    | -3.5445726 |
| CCL24    | -1.8986509 |
| CCL25    | -1.0563738 |
| CCL26    | -3.7016811 |
| CCL27A   | -0.9983926 |
| CCL6     | -1.4597285 |
| CCL8     | -3.24246   |
| CCM2L    | -0.9581296 |
| CCNA2    | -1.1689954 |
| CCNB1IP1 | -2.3929605 |
| CCNB2    | -0.6801446 |
| CCND1    | -2.316137  |
| CCND2    | -1.424926  |
| CCNO     | -1.3024282 |

|         |            |
|---------|------------|
| CCNY    | -1.3275268 |
| CCR2    | -2.1920862 |
| CCR3    | -5.108329  |
| CCR6    | -3.9769824 |
| CCSER1  | -3.2821925 |
| CCT8L1  | -2.3741906 |
| CD101   | -3.6729293 |
| CD151   | -0.3084471 |
| CD160   | -2.8864563 |
| CD163L1 | -3.2744439 |
| CD164L2 | -3.8584352 |
| CD177   | -1.6957226 |
| CD19    | -1.4197474 |
| CD2     | -1.9864731 |
| CD200R1 | -2.206774  |
| CD200R2 | -2.9883318 |
| CD200R4 | -2.95722   |
| CD207   | -2.7799296 |
| CD209A  | -3.688334  |
| CD209B  | -3.7792866 |
| CD209D  | -2.043885  |
| CD209E  | -2.621885  |
| CD209F  | -3.612603  |
| CD209G  | -4.9085846 |
| CD22    | -0.9847624 |
| CD226   | -2.1850207 |
| CD247   | -2.7341294 |
| CD248   | -1.2915828 |
| CD24A   | -2.4195116 |
| CD27    | -1.6327391 |
| CD300C  | -1.202574  |
| CD300LB | -2.6764834 |
| CD300LD | -0.9800921 |
| CD300LH | -1.7591302 |
| CD34    | -2.798125  |
| CD36    | -1.0875871 |
| CD3D    | -0.6888549 |
| CD3E    | -0.575721  |
| CD3G    | -1.4241326 |
| CD40LG  | -3.7962584 |
| CD44    | -0.6112926 |
| CD46    | -1.3055325 |
| CD5     | -1.4821696 |
| CD52    | -1.0786598 |
| CD59B   | -2.7176123 |

|          |            |
|----------|------------|
| CD6      | -0.8451831 |
| CD7      | -0.7672019 |
| CD79A    | -2.60532   |
| CD79B    | -2.802652  |
| CD8A     | -1.6508737 |
| CD8B1    | -1.087054  |
| CD96     | -1.9822556 |
| CDAN1    | -2.185313  |
| CDC14A   | -1.7180443 |
| CDC20    | -1.3147025 |
| CDC20B   | -4.0820575 |
| CDC25B   | -1.8991885 |
| CDC27    | -0.3411129 |
| CDC42BPB | -0.7625771 |
| CDC42BPG | -2.7907722 |
| CDC42EP3 | -3.0083914 |
| CDC45    | -2.2733617 |
| CDC6     | -1.0147314 |
| CDCA2    | -1.6420257 |
| CDCA3    | -0.5597363 |
| CDCA5    | -0.907918  |
| CDCA7L   | -1.0205903 |
| CDCA8    | -0.660733  |
| CDCP1    | -1.303489  |
| CDH1     | -2.5712314 |
| CDH10    | -4.165737  |
| CDH12    | -3.0257933 |
| CDH13    | -3.6538587 |
| CDH15    | -1.6661172 |
| CDH16    | -6.7099214 |
| CDH17    | -3.7152991 |
| CDH18    | -3.168717  |
| CDH20    | -5.599224  |
| CDH22    | -3.1531928 |
| CDH23    | -2.4140124 |
| CDH24    | -1.9148116 |
| CDH26    | -4.4228435 |
| CDH5     | -0.630861  |
| CDH8     | -2.6597126 |
| CDH9     | -2.2342787 |
| CDHR3    | -2.6448898 |
| CDK14    | -3.1319547 |
| CDK15    | -2.4787009 |
| CDK19    | -0.527591  |
| CDK19OS  | -3.228683  |

|          |            |
|----------|------------|
| CDK5R2   | -4.1002364 |
| CDK6     | -0.9209263 |
| CDKL1    | -2.275113  |
| CDKL3    | -2.1286612 |
| CDKL4    | -1.187305  |
| CDKL5    | -1.728087  |
| CDKN1C   | -4.171606  |
| CDKN2A   | -1.4513972 |
| CDKN2B   | -3.8520215 |
| CDKN3    | -3.3369231 |
| CDNF     | -2.463898  |
| CDON     | -2.0380056 |
| CDR2     | -2.935394  |
| CDRT4    | -1.9026608 |
| CDRT4OS1 | -3.1724973 |
| CDS1     | -2.9014573 |
| CDSN     | -2.6071036 |
| CDX2     | -2.2098374 |
| CEACAM12 | -3.2481694 |
| CEACAM13 | -3.331368  |
| CEACAM16 | -0.4048822 |
| CEACAM20 | -4.7036667 |
| CEACAM3  | -1.8796005 |
| CEACAM5  | -3.357615  |
| CEBPE    | -2.4851806 |
| CEL      | -2.9371457 |
| CELA1    | -2.3007953 |
| CELA3B   | -3.6914394 |
| CELF2    | -0.8167703 |
| CELF3    | -4.0170007 |
| CELF6    | -2.9968734 |
| CELRR    | -4.9135485 |
| CELSR2   | -1.9174259 |
| CEMIP    | -3.6583083 |
| CEND1    | -1.4744182 |
| CENPA    | -0.7913799 |
| CENPE    | -0.8556731 |
| CENPF    | -0.8378477 |
| CENPH    | -0.8917549 |
| CENPI    | -5.415908  |
| CENPN    | -0.8382192 |
| CENPP    | -3.0864954 |
| CENPU    | -2.2337964 |
| CEP104   | -1.0843091 |
| CEP112   | -3.3785033 |

|         |            |
|---------|------------|
| CEP128  | -1.0558777 |
| CEP135  | -1.4068744 |
| CEP152  | -0.773068  |
| CEP250  | -0.8445699 |
| CEP41   | -1.0485222 |
| CEP57L1 | -3.0657544 |
| CEP78   | -2.5965512 |
| CER1    | -3.6082773 |
| CERCAM  | -2.474366  |
| CERS3   | -5.0346317 |
| CERS4   | -1.5817118 |
| CES1A   | -3.4897337 |
| CES2H   | -3.5800586 |
| CES4A   | -3.4976099 |
| CES5A   | -3.2784061 |
| CETN1   | -2.9453812 |
| CETN4   | -0.6095254 |
| CFD     | -7.942511  |
| CFTR    | -2.8361993 |
| CGA     | -1.2737613 |
| CGN     | -1.0784991 |
| CHAD    | -3.7549105 |
| CHADL   | -1.4223433 |
| CHAF1A  | -2.4414525 |
| CHAT    | -2.5262392 |
| CHD5    | -3.619713  |
| CHD6    | -1.1030772 |
| CHEK2   | -3.4173543 |
| CHGA    | -2.1844316 |
| CHIA1   | -7.9589553 |
| CHIL3   | -2.403896  |
| CHIL4   | -3.7995758 |
| CHIL5   | -2.8456788 |
| CHL1    | -4.035235  |
| CHMP4C  | -0.8235915 |
| CHN1    | -3.8096104 |
| CHP2    | -1.884867  |
| CHRD1   | -3.3008847 |
| CHRM2   | -2.6007571 |
| CHRM4   | -3.9400735 |
| CHRM5   | -4.9926457 |
| CHRNA10 | -3.7184262 |
| CHRNA2  | -1.2783687 |
| CHRNA3  | -2.6303189 |
| CHRNA4  | -0.7733164 |



|          |            |
|----------|------------|
| CHRNA5   | -3.460417  |
| CHRNA6   | -2.96802   |
| CHRNA9   | -2.9174798 |
| CHRNA1   | -2.3769863 |
| CHRNA3   | -4.5171156 |
| CHRNA4   | -3.4626303 |
| CHRNA5   | -3.4723492 |
| CHST1    | -5.2019095 |
| CHST12   | -1.2519195 |
| CHST2    | -2.2104828 |
| CHST3    | -3.6325655 |
| CHST4    | -3.4132714 |
| CHST5    | -2.5337188 |
| CHST7    | -1.7111366 |
| CHSY1    | -0.3093703 |
| CHTF18   | -0.8968606 |
| CIB2     | -0.8320081 |
| CIB3     | -3.2378163 |
| CIDEA    | -2.232064  |
| CIITA    | -5.268592  |
| CILP2    | -4.5394735 |
| CIT      | -3.4694076 |
| CITED1   | -1.2818608 |
| CK137956 | -4.0653133 |
| CKAP2    | -2.2137434 |
| CKAP2L   | -1.0109661 |
| CKAP4    | -3.3967226 |
| CKB      | -2.8323624 |
| CKMT2    | -5.3460493 |
| CLASP2   | -0.7847185 |
| CLCA3    | -7.777214  |
| CLCA5    | -5.6278973 |
| CLCN6    | -0.6450112 |
| CLCNKA   | -2.147676  |
| CLCNKB   | -0.4387014 |
| CLDN13   | -4.071478  |
| CLDN15   | -3.1823359 |
| CLDN16   | -4.2633886 |
| CLDN17   | -3.3157594 |
| CLDN18   | -5.17022   |
| CLDN20   | -1.3730004 |
| CLDN4    | -2.84872   |
| CLDN5    | -5.718268  |
| CLDN6    | -3.348473  |
| CLDN7    | -1.9651883 |

|         |            |
|---------|------------|
| CLDN8   | -2.7479033 |
| CLDN9   | -3.4963312 |
| CLEC10A | -1.726227  |
| CLEC12A | -3.7707663 |
| CLEC12B | -3.9672346 |
| CLEC14A | -3.564147  |
| CLEC18A | -2.6053662 |
| CLEC1A  | -5.88367   |
| CLEC2F  | -3.2315514 |
| CLEC2H  | -4.3761406 |
| CLEC2I  | -2.4337022 |
| CLEC2L  | -1.8654618 |
| CLEC4A2 | -2.581221  |
| CLEC4A3 | -0.7221754 |
| CLEC4A4 | -3.1858351 |
| CLEC4B1 | -1.5286446 |
| CLEC5A  | -4.4299297 |
| CLEC7A  | -3.9926593 |
| CLIC3   | -8.379709  |
| CLIC5   | -6.279014  |
| CLIC6   | -6.008561  |
| CLIP3   | -1.8641703 |
| CLIP4   | -4.0847263 |
| CLMP    | -5.636949  |
| CLNK    | -2.1217647 |
| CLPS    | -1.7612605 |
| CLPSL2  | -1.9058604 |
| CLRN2   | -3.9050784 |
| CLRN3   | -3.6298246 |
| CLSTN1  | -3.0923975 |
| CLSTN2  | -1.535521  |
| CLSTN3  | -0.7830334 |
| CLVS1   | -2.786617  |
| CMKLR1  | -1.5734882 |
| CMTM2A  | -3.2878387 |
| CMTM4   | -0.3262789 |
| CNBD2   | -1.7050177 |
| CNDP1   | -4.172367  |
| CNFN    | -2.2587392 |
| CNGA2   | -2.0873606 |
| CNGA3   | -2.380571  |
| CNGB3   | -0.5407431 |
| CNIH3   | -3.6375837 |
| CNKS1   | -3.569926  |
| CNN1    | -6.4864073 |

|          |            |
|----------|------------|
| CNN2     | -1.621249  |
| CNNM1    | -1.2965593 |
| CNPY1    | -2.9036279 |
| CNPY4    | -1.295599  |
| CNR1     | -3.0455453 |
| CNRIP1   | -1.2696197 |
| CNST     | -0.5182686 |
| CNTLN    | -1.4764292 |
| CNTN1    | -6.103075  |
| CNTN2    | -1.9606357 |
| CNTN5    | -6.9445333 |
| CNTN6    | -1.0528755 |
| CNTNAP3  | -4.311499  |
| CNTNAP5A | -5.0684156 |
| CNTNAP5B | -4.260293  |
| COL10A1  | -2.9618857 |
| COL11A2  | -3.5357714 |
| COL12A1  | -2.153037  |
| COL13A1  | -1.3110569 |
| COL15A1  | -1.590359  |
| COL16A1  | -3.0526893 |
| COL1A1   | -3.4955711 |
| COL1A2   | -3.587537  |
| COL23A1  | -4.511297  |
| COL25A1  | -3.729396  |
| COL26A1  | -2.498645  |
| COL3A1   | -2.4085515 |
| COL4A3   | -6.73176   |
| COL4A3BP | -1.3452432 |
| COL4A4   | -5.400158  |
| COL4A5   | -4.61751   |
| COL4A6   | -1.9409194 |
| COL5A1   | -1.0381761 |
| COL5A2   | -3.641494  |
| COL5A3   | -0.3622479 |
| COL6A1   | -5.541952  |
| COL6A2   | -3.496992  |
| COL6A3   | -4.2225075 |
| COL6A6   | -3.3439329 |
| COL7A1   | -2.622065  |
| COL8A1   | -2.8140295 |
| COL8A2   | -3.5163019 |
| COL9A1   | -3.2688384 |
| COL9A2   | -1.5550954 |
| COLGALT2 | -4.764329  |

|          |            |
|----------|------------|
| COLQ     | -5.1882553 |
| COPG2OS2 | -2.7695549 |
| COPS7B   | -1.5660169 |
| CORO1A   | -1.7371032 |
| CORO2A   | -1.358506  |
| CORO2B   | -3.0669827 |
| CORO6    | -2.0623832 |
| CORT     | -2.238481  |
| COX10    | -3.841429  |
| COX4I2   | -1.8023696 |
| COX6A2   | -2.7225404 |
| COX6B2   | -1.609731  |
| COX7A1   | -1.5297575 |
| COX8B    | -6.1608114 |
| CPA1     | -3.9070566 |
| CPA2     | -4.81476   |
| CPA3     | -3.1739223 |
| CPA4     | -3.6253755 |
| CPA5     | -2.4183109 |
| CPE      | -1.5735097 |
| CPEB1    | -0.351522  |
| CPHX1    | -1.6442116 |
| CPLX3    | -3.0955195 |
| CPLX4    | -1.9317021 |
| CPM      | -4.164617  |
| CPNE4    | -2.832051  |
| CPNE7    | -1.2210104 |
| CPNE9    | -1.6594529 |
| CPSF4L   | -1.4947687 |
| CPT1C    | -3.2476315 |
| CPVL     | -2.3679504 |
| CPXM1    | -3.489415  |
| CPXM2    | -6.1338043 |
| CPZ      | -3.663813  |
| CRABP1   | -2.3486726 |
| CRABP2   | -0.6560023 |
| CRB2     | -1.9063392 |
| CRCT1    | -5.1094255 |
| CREG2    | -4.1437216 |
| CRH      | -3.7460444 |
| CRHBP    | -4.7579837 |
| CRHR1    | -0.9909012 |
| CRHR2    | -1.5857592 |
| CRIM1    | -1.8767114 |
| CRIP1    | -3.582009  |

|          |            |
|----------|------------|
| CRIP2    | -2.4101212 |
| CRISP3   | -2.7072277 |
| CRISPLD2 | -0.2748711 |
| CRLF1    | -5.597558  |
| CRMP1    | -5.162241  |
| CRNN     | -6.000537  |
| CROCC    | -0.8885198 |
| CRTAC1   | -2.1268463 |
| CRXOS    | -3.4734921 |
| CRYAA    | -2.071374  |
| CRYAB    | -3.6333594 |
| CRYBA1   | -2.9234369 |
| CRYBA2   | -5.1505003 |
| CRYBB1   | -2.604739  |
| CRYBB2   | -3.394289  |
| CRYBG3   | -0.8900809 |
| CRYGA    | -0.7222083 |
| CRYGC    | -3.1111927 |
| CRYGD    | -2.1388025 |
| CRYGF    | -3.22717   |
| CRYGN    | -2.7272863 |
| CRYL1    | -0.4371977 |
| CSDC2    | -3.1694188 |
| CSMD2    | -4.44141   |
| CSMD2OS  | -2.2794285 |
| CSN3     | -3.2570117 |
| CSPG4    | -4.025898  |
| CSRNP2   | -0.5036037 |
| CSRNP3   | -0.8136971 |
| CST10    | -4.1901836 |
| CST12    | -3.967315  |
| CST3     | -0.6955245 |
| CST6     | -2.7737849 |
| CST8     | -5.692548  |
| CSTAD    | -2.6071758 |
| CSTL1    | -3.3044717 |
| CTBP2    | -0.7542107 |
| CTCFL    | -2.6359234 |
| CTDSPL   | -1.8592541 |
| CTF2     | -2.086426  |
| CTGF     | -1.7475574 |
| CTNND2   | -3.9986408 |
| CTRL     | -1.7951367 |
| CTS6     | -3.992878  |
| CTS7     | -5.175448  |

|         |            |
|---------|------------|
| CTSK    | -3.3706477 |
| CTSW    | -1.4591172 |
| CTTNBP2 | -2.374616  |
| CTXN1   | -4.386861  |
| CTXN2   | -4.3149834 |
| CUBN    | -1.5313213 |
| CUEDC1  | -2.1237812 |
| CUX1    | -0.4207077 |
| CUX2    | -0.4518662 |
| CX3CL1  | -2.4591627 |
| CXCL14  | -3.1455402 |
| CXCL15  | -8.508532  |
| CXCL17  | -1.6698506 |
| CXCR1   | -1.1557376 |
| CXCR2   | -2.4815626 |
| CXCR4   | -2.0431538 |
| CXCR5   | -1.3242121 |
| CXCR6   | -0.4620678 |
| CXX1A   | -1.449898  |
| CXX1B   | -2.0790517 |
| CXX1C   | -2.3447058 |
| CXXC4   | -2.3834493 |
| CYB5R2  | -2.992117  |
| CYBRD1  | -3.3835835 |
| CYCT    | -3.8788    |
| CYFIP2  | -0.6692665 |
| CYLC2   | -5.013752  |
| CYM     | -0.6474328 |
| CYP11B2 | -2.5110245 |
| CYP19A1 | -2.0357642 |
| CYP1A1  | -3.0231264 |
| CYP21A1 | -0.4427195 |
| CYP26B1 | -1.7921407 |
| CYP26C1 | -2.6783066 |
| CYP2A22 | -3.7372665 |
| CYP2AB1 | -3.110749  |
| CYP2C66 | -2.9925885 |
| CYP2F2  | -3.063812  |
| CYP2J11 | -3.9763498 |
| CYP2J9  | -2.4556644 |
| CYP2S1  | -7.2052917 |
| CYP2T4  | -0.6723421 |
| CYP2W1  | -1.5841589 |
| CYP4A29 | -5.239087  |
| CYP4B1  | -3.481219  |

|            |            |
|------------|------------|
| CYP4B1-PS2 | -3.2175164 |
| CYP4F18    | -2.9105287 |
| CYP4F39    | -2.9059954 |
| CYP4F40    | -3.337152  |
| CYP4F41-PS | -3.0480824 |
| CYP4X1     | -4.121257  |
| CYPT12     | -4.08853   |
| CYPT2      | -2.475719  |
| CYR61      | -1.0303218 |
| CYS1       | -2.2946632 |
| CYSLTR1    | -3.320777  |
| CYTH3      | -1.1949265 |
| CYTIP      | -0.5189979 |
| CYTL1      | -7.144908  |
| CYR1       | -1.5453179 |
| DAAM1      | -0.7387278 |
| DAAM2      | -2.282497  |
| DAB2IP     | -1.003165  |
| DACH1      | -3.4532735 |
| DACH2      | -1.937712  |
| DACT1      | -1.864352  |
| DACT3      | -0.4580405 |
| DAG1       | -0.4972494 |
| DAND5      | -1.2199025 |
| DAO        | -4.296154  |
| DAPK2      | -1.0645702 |
| DAPL1      | -3.9747412 |
| DBH        | -4.471038  |
| DBHOS      | -3.6512556 |
| DBIL5      | -2.7256205 |
| DBNDD1     | -2.9639742 |
| DBP        | -1.1082551 |
| DCDC2A     | -2.9996934 |
| DCDC2B     | -2.5702894 |
| DCLK1      | -2.5969777 |
| DCLK2      | -0.6503031 |
| DCPP1      | -3.934432  |
| DCST1      | -2.4710374 |
| DCSTAMP    | -2.3022602 |
| DCT        | -2.1925187 |
| DCTD       | -2.9451175 |
| DCUN1D3    | -2.6259983 |
| DCX        | -2.298738  |
| DCXR       | -0.6009085 |
| DDAH1      | -0.9018028 |

|           |            |
|-----------|------------|
| DDAH2     | -3.1481135 |
| DDIT4L    | -2.2442958 |
| DDR2      | -2.9023108 |
| DDX11     | -2.2525163 |
| DEAF1     | -0.265543  |
| DEAR1     | -2.7046525 |
| DEFA1     | -5.543997  |
| DEFA10    | -5.6617427 |
| DEFA21    | -3.393597  |
| DEFA23    | -6.593322  |
| DEFA25    | -4.7372274 |
| DEFA26    | -3.7763834 |
| DEFA3     | -3.9146202 |
| DEFA-PS1  | -5.3058405 |
| DEFA-PS13 | -0.7176564 |
| DEFA-RS1  | -3.376767  |
| DEFA-RS12 | -2.3447108 |
| DEFA-RS2  | -1.286385  |
| DEFA-RS4  | -1.8513799 |
| DEFA-RS7  | -2.4696283 |
| DEFB11    | -1.7501578 |
| DEFB13    | -4.811466  |
| DEFB14    | -3.4896278 |
| DEFB18    | -5.509198  |
| DEFB19    | -2.5036385 |
| DEFB2     | -3.800849  |
| DEFB20    | -6.583228  |
| DEFB21    | -2.482564  |
| DEFB22    | -4.766227  |
| DEFB23    | -1.5623097 |
| DEFB25    | -1.2355678 |
| DEFB26    | -3.2157238 |
| DEFB28    | -3.530088  |
| DEFB29    | -2.4707623 |
| DEFB30    | -2.9222655 |
| DEFB35    | -2.0456333 |
| DEFB36    | -4.5654902 |
| DEFB38    | -3.024488  |
| DEFB4     | -3.0057049 |
| DEFB40    | -3.602761  |
| DEFB41    | -3.3478646 |
| DEFB45    | -1.0430889 |
| DEFB46    | -3.0976634 |
| DEFB47    | -3.2665071 |
| DEFB48    | -3.2375903 |



|         |            |
|---------|------------|
| DEFB6   | -4.3741026 |
| DEFB7   | -5.276052  |
| DEFB9   | -3.1225922 |
| DENND2A | -1.9629729 |
| DENND2C | -3.1860557 |
| DENND3  | -0.7209411 |
| DEPDC1A | -2.0635705 |
| DEPDC1B | -1.1428235 |
| DEPDC5  | -1.0640423 |
| DES     | -2.8939335 |
| DFNB59  | -2.6131687 |
| DGKA    | -1.320718  |
| DGKB    | -2.9696636 |
| DGKEOS  | -0.7784343 |
| DGKG    | -3.644493  |
| DGKH    | -0.2959731 |
| DGKI    | -2.024485  |
| DGKK    | -6.0507555 |
| DHFR    | -1.2950845 |
| DHH     | -1.8011119 |
| DHRS1   | -1.2745817 |
| DHRS2   | -2.6557643 |
| DHRS3   | -0.8356831 |
| DHRS7C  | -6.5395784 |
| DHRS9   | -1.384887  |
| DHX37   | -0.4897895 |
| DIAP1   | -0.9758995 |
| DIAP3   | -2.0169995 |
| DIO3    | -1.4572265 |
| DIO3OS  | -1.833565  |
| DIP2A   | -0.7396286 |
| DIRAS2  | -4.854745  |
| DISC1   | -0.592597  |
| DISP1   | -0.701669  |
| DIXDC1  | -2.5727751 |
| DKK3    | -1.6650102 |
| DKK4    | -5.279909  |
| DKKL1   | -1.9741118 |
| DLC1    | -2.240665  |
| DLEC1   | -1.392956  |
| DLEU2   | -0.3868232 |
| DLG4    | -1.8762732 |
| DLGAP3  | -1.9756951 |
| DLK1    | -2.756823  |
| DLL1    | -1.3216746 |

|          |            |
|----------|------------|
| DLL4     | -3.0657403 |
| DLX5     | -5.0300913 |
| DLX6     | -5.78777   |
| DLX6AS2  | -2.1571703 |
| DLX6OS1  | -3.5411203 |
| DMC1     | -3.1945295 |
| DMD      | -1.1430434 |
| DMKN     | -3.0391428 |
| DMRT1    | -1.9031949 |
| DMRT3    | -5.1991143 |
| DMRTB1   | -3.4566789 |
| DMRTC1B  | -2.4328022 |
| DMRTC1C2 | -3.394575  |
| DNAAF1   | -3.4694595 |
| DNAAF3   | -0.7852442 |
| DNAH1    | -2.6018422 |
| DNAH10   | -3.675891  |
| DNAH12   | -4.3677998 |
| DNAH14   | -1.9536841 |
| DNAH17   | -3.6862822 |
| DNAH5    | -4.355846  |
| DNAH6    | -1.9069233 |
| DNAH7A   | -2.1724925 |
| DNAH7B   | -3.8921585 |
| DNAH8    | -2.4119737 |
| DNAH9    | -2.8207185 |
| DNAIC1   | -0.5988286 |
| DNAIC2   | -3.9229784 |
| DNAJA4   | -0.6045439 |
| DNAJB12  | -0.4474351 |
| DNAJB13  | -2.0485973 |
| DNAJB4   | -0.5342662 |
| DNAJB8   | -3.5966997 |
| DNAJC4   | -0.2649052 |
| DNAJC5B  | -2.593317  |
| DNALI1   | -6.359765  |
| DNASE1   | -4.7516813 |
| DND1     | -1.866106  |
| DNM1     | -1.9385862 |
| DNM3     | -2.42999   |
| DNMBP    | -0.8567946 |
| DNMT3A   | -0.6078382 |
| DNMT3AOS | -2.7058454 |
| DNMT3B   | -0.3485603 |
| DNMT3BOS | -1.035147  |

|        |            |
|--------|------------|
| DOC2A  | -5.9479537 |
| DOCK2  | -1.2829967 |
| DOCK3  | -0.8427775 |
| DOCK6  | -0.9423101 |
| DOCK7  | -3.0608177 |
| DOCK8  | -1.5624304 |
| DOCK9  | -2.5551977 |
| DOK1   | -0.9732621 |
| DOK4   | -2.870534  |
| DOK6   | -3.0753055 |
| DOK7   | -3.8469725 |
| DOPEY1 | -0.3786798 |
| DOXL2  | -4.082863  |
| DPEP1  | -5.489747  |
| DPF1   | -2.641797  |
| DPF3   | -1.172154  |
| DPPA3  | -3.9198194 |
| DPPA4  | -1.8928471 |
| DPT    | -4.507796  |
| DPYS   | -0.6097882 |
| DPYSL2 | -3.120058  |
| DPYSL3 | -0.8871696 |
| DPYSL4 | -2.1425514 |
| DRAM1  | -1.3975537 |
| DRAXIN | -5.469443  |
| DRC1   | -4.184264  |
| DRD2   | -3.7310872 |
| DRD3   | -3.9263115 |
| DRP2   | -3.6622539 |
| DSC1   | -1.0124221 |
| DSC3   | -2.446578  |
| DSCAM  | -3.9312024 |
| DSEL   | -0.8150744 |
| DSG1C  | -3.4257452 |
| DSG3   | -2.4342294 |
| DSG4   | -3.39206   |
| DSPP   | -5.4506783 |
| DTL    | -1.2251363 |
| DTNA   | -2.428051  |
| DTWD2  | -0.8619955 |
| DTX4   | -0.5423405 |
| DUOX1  | -2.2709324 |
| DUPD1  | -5.776309  |
| DUSP13 | -3.7874744 |
| DUSP14 | -1.6997592 |

|          |            |
|----------|------------|
| DUSP15   | -3.1576037 |
| DUSP18   | -9.114308  |
| DUSP19   | -1.0518999 |
| DUSP26   | -3.0031874 |
| DUSP7    | -1.4086201 |
| DUSP9    | -2.249776  |
| DUT      | -0.6447198 |
| DUX      | -1.2170575 |
| DUXBL1   | -2.9739904 |
| DUXBL2   | -2.4421852 |
| DXBAY18  | -3.818662  |
| DYDC1    | -2.9474561 |
| DYDC2    | -3.72716   |
| DYNAP    | -3.2041144 |
| DYNC2H1  | -0.4271381 |
| DYNC2LI1 | -2.018942  |
| DYNLL1   | -3.2982268 |
| DYNLRB2  | -7.8330564 |
| DYSF     | -0.33757   |
| DYTN     | -4.019317  |
| DYX1C1   | -1.0491483 |
| DZANK1   | -2.7924423 |
| DZIP1L   | -4.167182  |
| E2F2     | -2.2383602 |
| E2F4     | -1.1066837 |
| EAR1     | -4.824317  |
| EAR10    | -4.0741463 |
| EAR12    | -5.0691233 |
| EAR2     | -4.241288  |
| EAR4     | -7.255369  |
| EAR6     | -4.5396485 |
| EAR7     | -2.5031228 |
| ECE1     | -0.5679805 |
| ECHDC1   | -1.817533  |
| ECM2     | -4.6916323 |
| EDAR     | -3.3200204 |
| EDARADD  | -1.7903593 |
| EDDM3B   | -3.6377418 |
| EDN2     | -4.4033823 |
| EDN3     | -2.5219116 |
| EEF2K    | -2.4985273 |
| EFCAB1   | -2.7656953 |
| EFCAB10  | -4.4756885 |
| EFCAB11  | -3.1045964 |
| EFCAB12  | -1.4162152 |

|         |            |
|---------|------------|
| EFCAB3  | -3.5234528 |
| EFCAB4A | -2.6715307 |
| EFCAB4B | -1.6648123 |
| EFCAB5  | -3.016764  |
| EFCAB7  | -2.4108725 |
| EFCAB9  | -7.20887   |
| EFCC1   | -4.044627  |
| EFEMP1  | -2.392605  |
| EFEMP2  | -0.6310432 |
| EFHB    | -2.3847392 |
| EFHC1   | -2.9061487 |
| EFHD1   | -3.0431404 |
| EFNA2   | -3.0114202 |
| EFNA3   | -2.5388901 |
| EFNA4   | -1.2307184 |
| EFNB1   | -2.0500915 |
| EFNB2   | -3.0329113 |
| EFNB3   | -1.3139191 |
| EFR3B   | -2.3515685 |
| EFS     | -1.1041114 |
| EGFBP2  | -1.0777946 |
| EGFEM1  | -1.128387  |
| EGFL6   | -4.2843313 |
| EGFL7   | -2.9978244 |
| EGFLAM  | -2.6243021 |
| EGLN1   | -2.204207  |
| EHD2    | -4.173874  |
| EHD4    | -1.5938623 |
| EHF     | -2.504929  |
| ELAVL3  | -4.441444  |
| ELF4    | -1.9945097 |
| ELF5    | -6.5305986 |
| ELFN2   | -1.6168106 |
| ELK3    | -2.8957162 |
| ELL3    | -1.9372739 |
| ELMO1   | -5.1887426 |
| ELMO2   | -1.5036771 |
| ELN     | -6.851184  |
| ELTD1   | -2.9766495 |
| EMB     | -2.4547133 |
| EMC10   | -2.0704184 |
| EMCN    | -2.4812    |
| EMID1   | -4.737626  |
| EML1    | -2.4678063 |
| EMP1    | -1.9527953 |

|           |            |
|-----------|------------|
| EMP2      | -3.7679908 |
| EMP3      | -1.4520199 |
| EMX1      | -3.897288  |
| EMX2OS    | -2.8216665 |
| EN2       | -0.4138056 |
| ENAH      | -2.329251  |
| ENAM      | -2.7451017 |
| ENDOD1    | -2.9455223 |
| ENDOU     | -3.902754  |
| ENG       | -0.7589486 |
| ENKD1     | -1.7416139 |
| ENKUR     | -0.7551668 |
| ENO4      | -3.8665578 |
| ENOX1     | -2.632756  |
| ENPP2     | -0.7546904 |
| ENPP6     | -3.6356573 |
| ENTHD1    | -3.0526063 |
| ENTPD3    | -2.9920645 |
| ENTPD7    | -2.0582528 |
| EOMES     | -3.2007565 |
| EPB4.1L1  | -2.1184902 |
| EPB4.1L2  | -1.8773658 |
| EPB4.1L4A | -1.703758  |
| EPB4.2    | -2.389994  |
| EPCAM     | -3.8847806 |
| EPDR1     | -2.419247  |
| EPG5      | -0.605149  |
| EPGN      | -1.6190934 |
| EPHA10    | -3.9404478 |
| EPHA3     | -2.346559  |
| EPHA4     | -3.787807  |
| EPHA7     | -1.8323989 |
| EPHB6     | -1.6391101 |
| EPHX3     | -1.9707742 |
| EPHX4     | -2.6833153 |
| EPO       | -4.1118627 |
| EPOR      | -2.8693275 |
| EPPIN     | -3.9996328 |
| EPS8      | -1.6907544 |
| EPS8L1    | -3.2042499 |
| EPS8L2    | -3.727868  |
| EPSTI1    | -3.7910259 |
| EPX       | -3.172696  |
| ERAS      | -4.628866  |
| ERBB2     | -3.017569  |

|         |            |
|---------|------------|
| ERC1    | -1.1769793 |
| ERC2    | -0.5902469 |
| ERG     | -2.6425843 |
| ERICH3  | -2.5298944 |
| ERICH6  | -1.8233421 |
| ERMAP   | -1.0640597 |
| ERN2    | -2.2648277 |
| ERV3    | -4.2963057 |
| ESAM    | -0.7831013 |
| ESM1    | -0.8724473 |
| ESP6    | -3.9560585 |
| ESPL1   | -2.2620206 |
| ESPNL   | -0.9278302 |
| ESRP1   | -2.4649575 |
| ESRRB   | -1.0685937 |
| ESRRG   | -2.7556498 |
| ESYT3   | -4.1142426 |
| ETL4    | -1.3925326 |
| ETOH11  | -2.137411  |
| ETV1    | -2.9029315 |
| ETV2    | -5.5424967 |
| ETV3L   | -3.104709  |
| ETV5    | -2.473707  |
| EVA1C   | -0.2900279 |
| EVC     | -5.033366  |
| EVPL    | -4.2498603 |
| EXO1    | -0.7298486 |
| EXOC3L  | -1.1109974 |
| EXOC3L2 | -1.3514287 |
| EXOC4   | -0.5524006 |
| EXOG    | -2.6049085 |
| EXT2    | -1.3271585 |
| EYA2    | -7.5387735 |
| EYA4    | -2.1736298 |
| EZR     | -0.6771557 |
| F2R     | -0.5938857 |
| F2RL2   | -1.4971089 |
| F3      | -2.2393382 |
| F8A     | -2.5056634 |
| FABP12  | -1.2163548 |
| FABP3   | -4.383831  |
| FABP6   | -5.408747  |
| FABP9   | -5.8825316 |
| FADDOS  | -2.62176   |
| FADS3   | -2.2458858 |

|          |            |
|----------|------------|
| FADS6    | -1.3929014 |
| FAIM2    | -5.1728964 |
| FAIM3    | -2.6672297 |
| FAM101A  | -4.0130377 |
| FAM101B  | -3.5533485 |
| FAM105A  | -2.3649397 |
| FAM109B  | -1.9237916 |
| FAM110A  | -1.3808868 |
| FAM110B  | -1.8328927 |
| FAM110C  | -1.0293217 |
| FAM111A  | -0.5436556 |
| FAM115C  | -1.9518518 |
| FAM117A  | -1.9432933 |
| FAM122B  | -1.3189046 |
| FAM124B  | -1.0950782 |
| FAM126A  | -0.4400413 |
| FAM129A  | -0.9504032 |
| FAM129B  | -2.0472858 |
| FAM131A  | -2.1426697 |
| FAM131B  | -3.912162  |
| FAM131C  | -2.7421432 |
| FAM132B  | -2.8158288 |
| FAM13A   | -1.9696865 |
| FAM150A  | -2.8370142 |
| FAM151A  | -2.4024384 |
| FAM154A  | -2.9635692 |
| FAM154B  | -3.7982066 |
| FAM155A  | -2.649304  |
| FAM159A  | -3.5297604 |
| FAM160A1 | -2.4211338 |
| FAM161A  | -2.4053645 |
| FAM161B  | -1.9613893 |
| FAM162B  | -6.3923817 |
| FAM163B  | -4.079216  |
| FAM166B  | -5.9802375 |
| FAM170A  | -3.179683  |
| FAM170B  | -3.6680052 |
| FAM171A1 | -1.7405686 |
| FAM171A2 | -2.915696  |
| FAM171B  | -2.6751337 |
| FAM174B  | -3.5116477 |
| FAM178B  | -0.860379  |
| FAM179A  | -4.411509  |
| FAM180A  | -1.7601409 |
| FAM181A  | -4.2301164 |



|           |            |
|-----------|------------|
| FAM181B   | -5.35174   |
| FAM183B   | -7.7101564 |
| FAM184A   | -1.779237  |
| FAM188B2  | -4.303918  |
| FAM189A2  | -4.4859686 |
| FAM189B   | -1.3460093 |
| FAM198A   | -3.762583  |
| FAM198B   | -4.1358204 |
| FAM19A1   | -2.3598065 |
| FAM19A5   | -2.8389287 |
| FAM212A   | -2.0573401 |
| FAM212B   | -2.1473107 |
| FAM216B   | -4.583846  |
| FAM217A   | -2.377336  |
| FAM217B   | -2.473634  |
| FAM219AOS | -4.944992  |
| FAM219B   | -0.805794  |
| FAM221A   | -2.5816598 |
| FAM221B   | -2.9740956 |
| FAM227A   | -5.2774925 |
| FAM227B   | -2.6343727 |
| FAM228B   | -2.9896305 |
| FAM229B   | -1.436404  |
| FAM24A    | -2.5522804 |
| FAM26E    | -1.4298146 |
| FAM3B     | -3.2537632 |
| FAM46B    | -3.4808977 |
| FAM46C    | -0.8850539 |
| FAM47E    | -3.0290284 |
| FAM50B    | -2.786138  |
| FAM57A    | -2.8854148 |
| FAM57B    | -1.771445  |
| FAM60A    | -2.1089296 |
| FAM64A    | -3.169325  |
| FAM65A    | -0.4663637 |
| FAM65B    | -1.3102741 |
| FAM65C    | -1.4816076 |
| FAM69A    | -0.4594235 |
| FAM69B    | -3.2868114 |
| FAM71A    | -3.1321828 |
| FAM71B    | -3.0518985 |
| FAM71E2   | -3.2694333 |
| FAM71F1   | -3.2910254 |
| FAM81B    | -3.8296733 |
| FAM83A    | -1.3032482 |

|        |            |
|--------|------------|
| FAM83B | -1.102673  |
| FAM83C | -3.6173747 |
| FAM83E | -3.2239845 |
| FAM84A | -1.4425724 |
| FAM89A | -1.3067148 |
| FAM92B | -4.712693  |
| FAN1   | -1.071967  |
| FANCD2 | -2.5622838 |
| FANCG  | -2.909738  |
| FANCI  | -4.926924  |
| FANK1  | -3.618649  |
| FAR1   | -2.6182775 |
| FASN   | -1.1404905 |
| FAT2   | -1.0520022 |
| FAT3   | -3.0811162 |
| FAT4   | -2.8927143 |
| FBF1   | -2.2917376 |
| FBLL1  | -7.3436437 |
| FBLN1  | -3.7193694 |
| FBLN2  | -2.430216  |
| FBLN5  | -5.410521  |
| FBLN7  | -4.0321403 |
| FBN1   | -1.7109728 |
| FBN2   | -3.5298543 |
| FBP2   | -2.7993422 |
| FBXL16 | -2.5736494 |
| FBXL2  | -1.2293391 |
| FBXL7  | -3.4608288 |
| FBXO10 | -1.4950025 |
| FBXO15 | -0.730571  |
| FBXO16 | -2.4585807 |
| FBXO17 | -1.1525376 |
| FBXO2  | -0.4845226 |
| FBXO24 | -2.5107427 |
| FBXO32 | -0.6075246 |
| FBXO36 | -0.9333196 |
| FBXO39 | -3.8761544 |
| FBXO41 | -4.6418643 |
| FBXO43 | -4.6904564 |
| FBXO44 | -3.0469117 |
| FBXO47 | -3.8756766 |
| FBXO48 | -2.9521728 |
| FBXO5  | -1.5506105 |
| FBXW10 | -6.1557717 |
| FBXW13 | -2.3894284 |

|        |            |
|--------|------------|
| FBXW19 | -3.3877769 |
| FBXW20 | -1.3788695 |
| FBXW21 | -2.046033  |
| FBXW26 | -3.7937317 |
| FBXW27 | -2.2853687 |
| FCAMR  | -2.7471154 |
| FCER2A | -2.4188256 |
| FCGBP  | -3.3775914 |
| FCHO1  | -1.0460908 |
| FCNB   | -1.5144358 |
| FCOR   | -1.6574318 |
| FCRL6  | -2.9359617 |
| FCRLB  | -3.6005328 |
| FCRLS  | -1.2026606 |
| FENDRR | -3.8947148 |
| FER1L4 | -3.2765799 |
| FER1L6 | -2.4418166 |
| FERD3L | -5.993969  |
| FEV    | -2.7286649 |
| FFAR2  | -3.7976198 |
| FFAR4  | -0.6277599 |
| FGD1   | -2.6717937 |
| FGD2   | -1.181207  |
| FGD5   | -2.4085612 |
| FGD6   | -0.6717901 |
| FGF1   | -2.783285  |
| FGF10  | -4.0625424 |
| FGF11  | -3.5031118 |
| FGF12  | -2.5916967 |
| FGF13  | -2.1517038 |
| FGF14  | -2.9685395 |
| FGF17  | -1.8724804 |
| FGF18  | -4.630459  |
| FGF2   | -2.3183157 |
| FGF20  | -3.739254  |
| FGF22  | -0.9219499 |
| FGF4   | -4.9097304 |
| FGF6   | -0.9839327 |
| FGF7   | -4.5214386 |
| FGF8   | -2.121355  |
| FGF9   | -3.6037307 |
| FGFBP1 | -5.1660285 |
| FGFBP3 | -1.5332444 |
| FGFR1  | -1.2691493 |
| FGFR3  | -1.9833579 |

|         |            |
|---------|------------|
| FHDC1   | -3.864531  |
| FHIT    | -3.471372  |
| FHL1    | -4.516389  |
| FHL2    | -2.5976443 |
| FHL5    | -2.4241405 |
| FHOD1   | -1.2403395 |
| FHOD3   | -3.0985305 |
| FIBIN   | -5.0943747 |
| FIGF    | -5.2957835 |
| FIGLA   | -3.6546812 |
| FIGNL1  | -0.7907617 |
| FILIP1  | -0.7529786 |
| FKBP10  | -0.7670224 |
| FKBP11  | -2.7104545 |
| FKBP15  | -0.4885738 |
| FKBP1B  | -0.8507667 |
| FKBP4   | -0.9649434 |
| FKBP7   | -2.3340595 |
| FLG     | -2.8996325 |
| FLI1    | -0.7727993 |
| FLNC    | -3.1418438 |
| FLRT2   | -3.3402574 |
| FLRT3   | -6.56553   |
| FLT1    | -2.174146  |
| FLT3    | -2.3617172 |
| FLT3L   | -0.8759608 |
| FLT4    | -0.290139  |
| FLYWCH2 | -1.8872619 |
| FMN1    | -2.1845305 |
| FMN2    | -2.0501585 |
| FMNL1   | -5.9002624 |
| FMNL3   | -2.4869642 |
| FMO2    | -5.479324  |
| FMO3    | -1.5322704 |
| FMOD    | -2.788177  |
| FN3K    | -2.1441958 |
| FND3C2  | -3.0580103 |
| FNDC1   | -3.8628314 |
| FNDC3C1 | -6.1734867 |
| FNDC5   | -4.4373302 |
| FNDC7   | -2.1459727 |
| FNDC9   | -2.172525  |
| FOLR1   | -2.3533745 |
| FOLR4   | -1.5286787 |
| FOSB    | -3.542759  |

|         |            |
|---------|------------|
| FOXB1   | -3.146861  |
| FOXB2   | -5.4949546 |
| FOXC1   | -1.777497  |
| FOXD2   | -2.4228857 |
| FOXD2OS | -1.9055047 |
| FOXD4   | -3.6428776 |
| FOXE1   | -4.933557  |
| FOXF1   | -3.2307088 |
| FOXF2   | -5.7530384 |
| FOXH1   | -3.470099  |
| FOXI1   | -2.4001853 |
| FOXI2   | -3.8550704 |
| FOXI3   | -3.1005034 |
| FOXJ1   | -5.621475  |
| FOXJ2   | -3.33028   |
| FOXL1   | -2.4774787 |
| FOXL2OS | -2.6743379 |
| FOXM1   | -1.92434   |
| FOXN4   | -3.6167538 |
| FOXO3   | -1.8600547 |
| FOXO4   | -3.5732632 |
| FOXO6   | -3.8154683 |
| FOXP2   | -1.6894441 |
| FOXP3   | -1.9950829 |
| FOXR1   | -2.9256606 |
| FOXS1   | -0.613271  |
| FRAS1   | -4.215372  |
| FRAT2   | -1.149164  |
| FREM1   | -4.4859896 |
| FREM2   | -1.0356977 |
| FREM3   | -2.3299718 |
| FRMD3   | -1.9839773 |
| FRMD4A  | -1.5838888 |
| FRMD5   | -2.0125875 |
| FRMD6   | -3.1563787 |
| FRMD7   | -2.683954  |
| FRMPD1  | -3.6617167 |
| FRRS1L  | -3.3196654 |
| FRS3OS  | -3.8195977 |
| FRY     | -0.9758611 |
| FSCN3   | -2.4098296 |
| FSD1    | -2.4419024 |
| FSD2    | -9.474304  |
| FSHB    | -3.905808  |
| FSHR    | -3.4429352 |

|         |            |
|---------|------------|
| FSIP1   | -2.7830276 |
| FSIP2   | -3.2910964 |
| FSTL1   | -0.9185889 |
| FSTL3   | -3.9375694 |
| FTMT    | -2.4620752 |
| FTSJ2   | -0.36394   |
| FUT10   | -0.4267533 |
| FUT4    | -2.664606  |
| FUT7    | -3.0608127 |
| FUT8    | -0.4846115 |
| FUT9    | -1.5529113 |
| FUZ     | -0.3145266 |
| FV1     | -3.3958385 |
| FXD2    | -3.632992  |
| FXD3    | -3.674202  |
| FXD4    | -3.5847454 |
| FXD6    | -4.5777793 |
| FXD7    | -5.4744287 |
| FZD2    | -4.8271914 |
| FZD3    | -1.3469651 |
| FZD5    | -3.8524525 |
| FZD6    | -0.6975083 |
| FZD7    | -1.0636313 |
| G0S2    | -1.0623562 |
| G2E3    | -1.0448651 |
| G6B     | -3.940211  |
| G6BOS   | -1.7228687 |
| G6PC2   | -4.8451595 |
| G6PD2   | -1.1283674 |
| GAB2    | -4.292278  |
| GABBR1  | -3.5762537 |
| GABRA3  | -1.2222004 |
| GABRB1  | -3.6716733 |
| GABRB2  | -2.9977736 |
| GABRD   | -2.08757   |
| GABRG1  | -6.5716276 |
| GABRG2  | -2.3091545 |
| GABRG3  | -2.607646  |
| GABRP   | -3.2923117 |
| GABRR3  | -2.7593582 |
| GAD1    | -3.0409522 |
| GAD1OS  | -4.476002  |
| GAD2    | -4.5646152 |
| GAL     | -1.0720913 |
| GAL3ST1 | -1.565392  |

|         |            |
|---------|------------|
| GAL3ST2 | -2.409774  |
| GALNT12 | -2.4111612 |
| GALNT13 | -2.959567  |
| GALNT14 | -3.3899581 |
| GALNT15 | -3.171592  |
| GALNT16 | -2.8177896 |
| GALNT18 | -2.89212   |
| GALNT3  | -1.18644   |
| GALNT5  | -5.306819  |
| GALP    | -3.2047508 |
| GALR3   | -5.2449646 |
| GALT    | -0.9107521 |
| GAP43   | -6.0826836 |
| GAPDHS  | -1.7841005 |
| GAREML  | -4.0515985 |
| GARNL3  | -3.8738618 |
| GAS2L2  | -5.050393  |
| GAS7    | -1.6263623 |
| GAST    | -2.642717  |
| GATA1   | -3.2225642 |
| GATA2   | -3.7089612 |
| GATA3   | -3.1058743 |
| GATSL2  | -1.6569433 |
| GATSL3  | -1.635946  |
| GBF1    | -0.8316929 |
| GBGT1   | -3.7883527 |
| GBX1    | -5.415117  |
| GBX2    | -2.8346376 |
| GCAP8   | -3.0578551 |
| GCG     | -2.5883338 |
| GCK     | -2.4853985 |
| GCNT1   | -2.9230325 |
| GCNT3   | -6.2464542 |
| GCNT4   | -2.0320632 |
| GDAP5   | -3.003724  |
| GDF1    | -4.1169815 |
| GDF11   | -2.9640307 |
| GDF3    | -0.9414921 |
| GDF5    | -5.4483347 |
| GDF7    | -4.150171  |
| GDF9    | -1.1189928 |
| GDNF    | -4.21163   |
| GDPD1   | -0.6648676 |
| GDPD2   | -4.7409887 |
| GDPD5   | -2.2072256 |

|          |            |
|----------|------------|
| GEN1     | -2.3282533 |
| GFAP     | -3.125214  |
| GFI1     | -1.5205305 |
| GFI1B    | -1.7421148 |
| GFRA2    | -1.0755618 |
| GFRA3    | -3.1569266 |
| GFRAL    | -2.971679  |
| GFY      | -3.7451665 |
| GGN      | -2.4278624 |
| GGT1     | -8.489059  |
| GGT5     | -0.8084003 |
| GGTA1    | -1.6718531 |
| GH       | -2.5905104 |
| GHRH     | -0.9298937 |
| GHRL     | -0.8749509 |
| GIMAP1   | -0.4810507 |
| GIMAP1OS | -2.3232746 |
| GIMAP4   | -0.454982  |
| GIMAP8   | -0.5274465 |
| GIN2     | -0.5907393 |
| GIP      | -5.8261757 |
| GIPC2    | -2.217237  |
| GIPC3    | -4.167987  |
| GIPR     | -4.9671407 |
| GJA3     | -4.1698914 |
| GJA5     | -5.1247215 |
| GJA8     | -3.7116914 |
| GJB3     | -5.072995  |
| GJB6     | -3.7863123 |
| GJC1     | -2.2472124 |
| GJD2     | -3.5820813 |
| GK2      | -6.0386534 |
| GLB1L2   | -4.6953163 |
| GLCCI1   | -0.6077869 |
| GLDN     | -1.5631423 |
| GLDNOS   | -4.0077662 |
| GLI1     | -5.475675  |
| GLI3     | -0.5778017 |
| GLIPR1   | -1.7035778 |
| GLIPR1L3 | -1.1102836 |
| GLIS2    | -2.4591436 |
| GLIS3    | -1.9268289 |
| GLP1R    | -3.5700302 |
| GLRA4    | -6.1033545 |
| GLRB     | -3.4755023 |



|          |            |
|----------|------------|
| GLT28D2  | -1.038974  |
| GLT6D1   | -1.8712893 |
| GLTP     | -1.2883487 |
| GLTSCR1  | -2.2008615 |
| GLTSCR1L | -0.4367285 |
| GLYATL3  | -4.4998646 |
| GLYCAM1  | -4.8599806 |
| GM10021  | -0.6024122 |
| GM10024  | -3.3307164 |
| GM10030  | -1.8125045 |
| GM10033  | -0.8390555 |
| GM10034  | -1.1056743 |
| GM10044  | -2.653232  |
| GM10069  | -4.8849974 |
| GM10071  | -2.8495655 |
| GM10081  | -2.2213085 |
| GM101    | -1.5591266 |
| GM10113  | -3.21487   |
| GM10144  | -0.8703485 |
| GM10158  | -2.4314535 |
| GM10199  | -4.9119263 |
| GM10209  | -2.5096269 |
| GM10220  | -4.69587   |
| GM10229  | -2.9007986 |
| GM10252  | -1.3926611 |
| GM10276  | -1.5354776 |
| GM10278  | -4.2024775 |
| GM10286  | -3.8707337 |
| GM10287  | -2.911983  |
| GM10319  | -2.313335  |
| GM10334  | -1.6513622 |
| GM10336  | -2.0550973 |
| GM10354  | -2.1029966 |
| GM10369  | -2.9041238 |
| GM10370  | -5.723751  |
| GM10371  | -2.460465  |
| GM10372  | -4.4270477 |
| GM10373  | -2.989299  |
| GM10375  | -4.3120813 |
| GM10385  | -1.6799395 |
| GM10389  | -2.2259347 |
| GM10403  | -4.1281204 |
| GM10408  | -2.4333637 |
| GM10415  | -3.6491964 |
| GM10419  | -2.892574  |

|         |            |
|---------|------------|
| GM10428 | -1.084218  |
| GM1043  | -2.949042  |
| GM10431 | -5.8911133 |
| GM10432 | -3.8688571 |
| GM10436 | -2.2020974 |
| GM10437 | -2.4412465 |
| GM10440 | -3.396999  |
| GM10450 | -3.6621106 |
| GM10457 | -0.9484863 |
| GM10465 | -4.2389145 |
| GM10469 | -3.4805236 |
| GM10471 | -2.8726938 |
| GM10474 | -1.5764298 |
| GM10475 | -2.796918  |
| GM10482 | -2.9060562 |
| GM10489 | -3.1217093 |
| GM10498 | -4.448678  |
| GM10501 | -4.796458  |
| GM10503 | -5.4194403 |
| GM10510 | -2.0233035 |
| GM10512 | -2.8880706 |
| GM10513 | -3.1271832 |
| GM10516 | -4.1431756 |
| GM10531 | -4.4459877 |
| GM10532 | -2.044706  |
| GM10536 | -6.980798  |
| GM10537 | -2.9868774 |
| GM10538 | -3.8969507 |
| GM10548 | -4.4576    |
| GM10560 | -2.8864594 |
| GM10572 | -3.3464253 |
| GM10579 | -3.319927  |
| GM10584 | -4.108696  |
| GM10588 | -2.6480932 |
| GM10603 | -1.6068459 |
| GM10609 | -1.2695282 |
| GM10615 | -0.5443239 |
| GM10623 | -2.4121733 |
| GM10624 | -3.0413325 |
| GM10638 | -1.7288284 |
| GM10651 | -1.4277971 |
| GM10673 | -1.066951  |
| GM10674 | -4.272662  |
| GM10682 | -1.69327   |
| GM10683 | -2.358812  |

|         |            |
|---------|------------|
| GM10684 | -4.0965037 |
| GM10687 | -4.2546487 |
| GM10688 | -3.8586118 |
| GM10697 | -0.6689782 |
| GM10701 | -2.4381192 |
| GM10714 | -3.5969653 |
| GM10727 | -2.4528756 |
| GM10732 | -3.3626416 |
| GM10744 | -3.5324445 |
| GM10747 | -4.600769  |
| GM10752 | -3.9667132 |
| GM10755 | -2.4432738 |
| GM10757 | -2.2151623 |
| GM10759 | -2.5111895 |
| GM10777 | -1.1106865 |
| GM10779 | -3.4117157 |
| GM10781 | -3.615168  |
| GM10787 | -2.7649822 |
| GM10789 | -2.3353288 |
| GM10790 | -2.3945794 |
| GM10802 | -4.8725085 |
| GM10804 | -3.1522455 |
| GM10814 | -3.3004143 |
| GM10815 | -3.196007  |
| GM10817 | -3.8728185 |
| GM10830 | -2.234074  |
| GM10835 | -3.8089879 |
| GM10836 | -3.1657178 |
| GM10844 | -3.513092  |
| GM10857 | -3.9761252 |
| GM10860 | -1.549654  |
| GM10864 | -2.3842542 |
| GM10865 | -1.8578892 |
| GM10866 | -2.9078197 |
| GM10867 | -4.6469707 |
| GM10871 | -1.71645   |
| GM10926 | -4.174084  |
| GM10933 | -1.931006  |
| GM1096  | -3.2101135 |
| GM11110 | -1.2294397 |
| GM11123 | -0.4206195 |
| GM11149 | -2.4741778 |
| GM11223 | -2.4928257 |
| GM1123  | -2.0994816 |
| GM11266 | -1.5013676 |

|         |            |
|---------|------------|
| GM11346 | -3.1721365 |
| GM11381 | -2.2262108 |
| GM11468 | -3.5120325 |
| GM11517 | -2.0480418 |
| GM11529 | -2.2657647 |
| GM11541 | -4.9903345 |
| GM11543 | -3.7158802 |
| GM11545 | -2.1151094 |
| GM11595 | -1.2476659 |
| GM11627 | -4.1018567 |
| GM11634 | -2.2549133 |
| GM11691 | -5.1252084 |
| GM11710 | -1.5654583 |
| GM11735 | -5.2635727 |
| GM11744 | -2.9498074 |
| GM11747 | -2.8574696 |
| GM11938 | -3.389773  |
| GM11961 | -1.3518817 |
| GM11981 | -4.1290846 |
| GM11992 | -3.7878442 |
| GM12000 | -2.1502643 |
| GM12059 | -3.997111  |
| GM12128 | -3.7007623 |
| GM12185 | -3.4792957 |
| GM12258 | -3.3013859 |
| GM12298 | -1.8645389 |
| GM12349 | -1.9736893 |
| GM12359 | -1.2487161 |
| GM12371 | -2.73981   |
| GM12408 | -3.4386268 |
| GM12409 | -3.785082  |
| GM12472 | -4.3437014 |
| GM12542 | -3.8057308 |
| GM12568 | -2.799428  |
| GM12580 | -3.5292597 |
| GM12592 | -1.8257062 |
| GM12633 | -3.4605024 |
| GM12666 | -1.0544553 |
| GM12695 | -10.161966 |
| GM12703 | -1.9619102 |
| GM12789 | -3.2660363 |
| GM12790 | -3.7422166 |
| GM12794 | -3.0333612 |
| GM12863 | -3.4286656 |
| GM12866 | -1.1828289 |

|         |            |
|---------|------------|
| GM12888 | -3.7368748 |
| GM12992 | -3.1273034 |
| GM13011 | -3.435105  |
| GM13032 | -4.8800545 |
| GM13051 | -3.0517066 |
| GM13083 | -3.0765765 |
| GM13088 | -2.6592774 |
| GM13111 | -2.9512868 |
| GM13112 | -3.0916657 |
| GM13119 | -3.501527  |
| GM13124 | -3.595435  |
| GM13125 | -2.229701  |
| GM13128 | -2.914737  |
| GM13152 | -2.8359222 |
| GM13154 | -1.5370703 |
| GM13205 | -4.53588   |
| GM13212 | -1.1393774 |
| GM13219 | -2.4958847 |
| GM1322  | -4.648609  |
| GM13247 | -1.3821707 |
| GM13275 | -1.6107945 |
| GM13304 | -3.0423167 |
| GM13372 | -4.1227984 |
| GM13403 | -4.447606  |
| GM13429 | -2.1040635 |
| GM13446 | -3.885608  |
| GM13580 | -3.1569858 |
| GM13710 | -2.384635  |
| GM13769 | -2.9092271 |
| GM13807 | -5.3620996 |
| GM13861 | -3.5031395 |
| GM14025 | -1.7960389 |
| GM14085 | -2.6214569 |
| GM14092 | -3.6911237 |
| GM14124 | -1.0881897 |
| GM14129 | -3.4815059 |
| GM14151 | -0.5539386 |
| GM14164 | -2.882161  |
| GM14207 | -2.9305189 |
| GM14243 | -5.709184  |
| GM14317 | -3.2519593 |
| GM14340 | -1.9298857 |
| GM14461 | -3.4696112 |
| GM14483 | -3.6533184 |
| GM14484 | -2.273113  |

|         |            |
|---------|------------|
| GM14486 | -3.5959628 |
| GM14488 | -3.07095   |
| GM14496 | -2.587119  |
| GM14499 | -2.9885046 |
| GM14634 | -2.5178683 |
| GM14725 | -2.3120217 |
| GM14743 | -0.8937054 |
| GM14762 | -1.0645962 |
| GM14851 | -7.5103045 |
| GM14920 | -3.9316125 |
| GM14964 | -2.3420372 |
| GM15023 | -4.5889025 |
| GM15104 | -4.286994  |
| GM15217 | -1.4971986 |
| GM1527  | -2.8960478 |
| GM15292 | -3.263051  |
| GM15299 | -5.006748  |
| GM15319 | -1.3237128 |
| GM15401 | -1.9966917 |
| GM15412 | -3.6712325 |
| GM15413 | -3.7633102 |
| GM15417 | -1.4289901 |
| GM15441 | -2.1940372 |
| GM15478 | -4.273676  |
| GM15498 | -7.7448635 |
| GM15514 | -5.285698  |
| GM156   | -1.8664005 |
| GM15612 | -3.4649925 |
| GM15628 | -2.6662765 |
| GM1564  | -1.2734475 |
| GM15762 | -3.3564563 |
| GM1604B | -2.2152026 |
| GM16287 | -0.3815651 |
| GM1631  | -3.1134398 |
| GM16428 | -4.003502  |
| GM16441 | -1.5751565 |
| GM16462 | -5.527996  |
| GM16486 | -2.2327132 |
| GM16488 | -3.983533  |
| GM16489 | -2.2765832 |
| GM16491 | -2.064983  |
| GM16498 | -3.9135714 |
| GM16505 | -1.1341269 |
| GM16508 | -2.367619  |
| GM16527 | -2.9353433 |

|         |            |
|---------|------------|
| GM16532 | -4.271863  |
| GM1661  | -1.8029423 |
| GM16686 | -2.533391  |
| GM1673  | -1.6482186 |
| GM16863 | -3.359451  |
| GM16982 | -2.303564  |
| GM17019 | -2.2015262 |
| GM1715  | -0.5865507 |
| GM17244 | -1.5148637 |
| GM17767 | -3.0225434 |
| GM17769 | -2.5734901 |
| GM17783 | -3.905599  |
| GM19410 | -3.4761147 |
| GM1965  | -3.3674862 |
| GM19668 | -0.4008267 |
| GM1968  | -2.527574  |
| GM1976  | -0.7071934 |
| GM1987  | -4.531559  |
| GM1993  | -3.8168864 |
| GM2002  | -1.2137413 |
| GM2027  | -3.2845907 |
| GM2042  | -2.6266568 |
| GM20554 | -0.6191187 |
| GM20556 | -2.4553344 |
| GM20558 | -5.8208065 |
| GM20604 | -2.8205278 |
| GM20611 | -1.9751549 |
| GM20740 | -3.417653  |
| GM20747 | -3.6908698 |
| GM20754 | -1.9622147 |
| GM20767 | -4.3880224 |
| GM20806 | -4.0655518 |
| GM20837 | -4.628445  |
| GM20865 | -1.9158437 |
| GM20877 | -3.1665678 |
| GM20878 | -0.6776826 |
| GM2090  | -3.8684616 |
| GM20939 | -0.4273729 |
| GM21276 | -1.5741479 |
| GM21292 | -1.9084139 |
| GM21464 | -5.3918877 |
| GM2155  | -2.12426   |
| GM21637 | -3.0142815 |
| GM21951 | -3.0027394 |
| GM2233  | -1.7989528 |

|        |            |
|--------|------------|
| GM2240 | -5.486637  |
| GM2483 | -2.1293097 |
| GM2491 | -4.4911203 |
| GM2511 | -2.1073956 |
| GM2582 | -0.3101711 |
| GM266  | -1.605382  |
| GM2670 | -4.722543  |
| GM2716 | -1.7470901 |
| GM2800 | -4.803954  |
| GM2824 | -0.8541322 |
| GM2927 | -3.6674986 |
| GM2990 | -4.250985  |
| GM2A   | -0.8842492 |
| GM3002 | -4.9862175 |
| GM3045 | -2.2617755 |
| GM3052 | -1.9241676 |
| GM3065 | -2.3976903 |
| GM3081 | -2.5014548 |
| GM3086 | -2.81256   |
| GM3134 | -0.6858087 |
| GM3146 | -1.8566563 |
| GM318  | -2.2071438 |
| GM3227 | -3.4196417 |
| GM3230 | -4.8409204 |
| GM3238 | -3.565649  |
| GM3264 | -2.490316  |
| GM3300 | -1.0262804 |
| GM3317 | -2.68371   |
| GM3325 | -1.1597776 |
| GM3336 | -5.6462045 |
| GM3364 | -2.638255  |
| GM3428 | -2.96005   |
| GM3509 | -2.5571496 |
| GM3510 | -3.0918221 |
| GM355  | -4.516876  |
| GM3561 | -2.1530218 |
| GM3596 | -4.116055  |
| GM3598 | -4.04162   |
| GM362  | -3.3690631 |
| GM3625 | -2.1214461 |
| GM364  | -2.8535042 |
| GM3646 | -3.634571  |
| GM3669 | -3.2641563 |
| GM3704 | -2.650382  |
| GM3718 | -2.0792418 |



|        |            |
|--------|------------|
| GM3740 | -2.8519082 |
| GM3763 | -3.98158   |
| GM3775 | -2.4646015 |
| GM3807 | -1.5867422 |
| GM382  | -4.210374  |
| GM3822 | -4.9038324 |
| GM3831 | -3.3653877 |
| GM3858 | -1.8830001 |
| GM3871 | -2.0786648 |
| GM3881 | -2.0254817 |
| GM3916 | -1.6126866 |
| GM3942 | -0.9506135 |
| GM3952 | -2.2901769 |
| GM3961 | -3.634747  |
| GM3985 | -4.209523  |
| GM4013 | -1.6654303 |
| GM4022 | -2.2838397 |
| GM4081 | -1.8070402 |
| GM4098 | -1.130209  |
| GM4107 | -1.3029237 |
| GM4120 | -0.3754289 |
| GM4131 | -4.105954  |
| GM4132 | -2.602158  |
| GM4151 | -3.2309153 |
| GM4200 | -1.6853743 |
| GM4201 | -4.5747166 |
| GM4203 | -5.9122686 |
| GM4211 | -4.6616645 |
| GM4221 | -1.711487  |
| GM4224 | -3.7872186 |
| GM4241 | -1.5764952 |
| GM4278 | -3.7180526 |
| GM4279 | -2.4379785 |
| GM4340 | -0.7014518 |
| GM4354 | -2.1717632 |
| GM436  | -1.9209604 |
| GM4371 | -3.0186987 |
| GM438  | -4.0706663 |
| GM44   | -1.9151459 |
| GM4419 | -4.53364   |
| GM4430 | -0.3352282 |
| GM4432 | -3.328448  |
| GM4454 | -3.3312228 |
| GM4461 | -1.831038  |
| GM4489 | -6.132696  |

|        |            |
|--------|------------|
| GM4532 | -1.6055841 |
| GM4544 | -1.1813519 |
| GM4567 | -3.8448267 |
| GM4593 | -1.1048527 |
| GM4598 | -5.4648995 |
| GM4610 | -2.5472934 |
| GM4633 | -2.713167  |
| GM4657 | -4.29566   |
| GM4665 | -3.3679767 |
| GM4745 | -5.50861   |
| GM4755 | -5.689489  |
| GM4758 | -0.9992275 |
| GM4759 | -1.7862687 |
| GM4763 | -2.6008267 |
| GM4776 | -3.6513448 |
| GM4791 | -2.8639216 |
| GM4792 | -3.9964185 |
| GM4794 | -1.6550071 |
| GM4850 | -3.0906796 |
| GM4868 | -6.1285477 |
| GM4872 | -5.316007  |
| GM4881 | -0.5738812 |
| GM4906 | -0.6818409 |
| GM4922 | -3.2357316 |
| GM4956 | -2.7468665 |
| GM4975 | -4.5157146 |
| GM4980 | -2.5735695 |
| GM4994 | -4.6588926 |
| GM5065 | -2.1530876 |
| GM5083 | -3.0206795 |
| GM5084 | -3.8404691 |
| GM5089 | -0.6904252 |
| GM5092 | -0.5232873 |
| GM5094 | -2.3847435 |
| GM5095 | -2.1566725 |
| GM5099 | -2.4825633 |
| GM5105 | -1.5597117 |
| GM5108 | -3.847272  |
| GM5113 | -1.7105064 |
| GM5118 | -2.4486992 |
| GM5122 | -3.6772432 |
| GM5124 | -5.4262476 |
| GM5127 | -4.857584  |
| GM5129 | -2.9543736 |
| GM5132 | -0.8973568 |

|        |            |
|--------|------------|
| GM5134 | -6.015809  |
| GM5141 | -1.3796308 |
| GM5144 | -4.500226  |
| GM5148 | -3.141596  |
| GM5155 | -3.0082045 |
| GM5174 | -2.7154753 |
| GM5177 | -3.0273035 |
| GM5215 | -1.2801173 |
| GM525  | -3.090662  |
| GM5258 | -2.817793  |
| GM527  | -0.6898036 |
| GM5294 | -3.2681344 |
| GM5296 | -1.5319378 |
| GM53   | -4.706484  |
| GM5331 | -3.0976658 |
| GM5334 | -3.2129095 |
| GM536  | -2.7763128 |
| GM5415 | -3.2263463 |
| GM5416 | -0.7880132 |
| GM5434 | -2.5937865 |
| GM5441 | -1.493742  |
| GM5447 | -2.9611034 |
| GM5458 | -1.6871194 |
| GM5468 | -4.146059  |
| GM5476 | -3.939689  |
| GM5477 | -3.3145356 |
| GM5478 | -1.1049101 |
| GM5485 | -3.3114593 |
| GM5486 | -0.5869522 |
| GM5493 | -3.8537529 |
| GM553  | -4.1790833 |
| GM5532 | -5.3331275 |
| GM5535 | -3.7982533 |
| GM5547 | -3.1415656 |
| GM5553 | -1.4248312 |
| GM5563 | -5.429826  |
| GM5565 | -2.912587  |
| GM5570 | -2.3689973 |
| GM5589 | -2.4374847 |
| GM5590 | -4.2869997 |
| GM5591 | -3.483943  |
| GM5593 | -0.6529822 |
| GM5606 | -5.5557575 |
| GM5607 | -2.4203618 |
| GM5608 | -3.108725  |

|        |            |
|--------|------------|
| GM5622 | -2.8452783 |
| GM5627 | -4.399283  |
| GM5635 | -2.692063  |
| GM5636 | -2.733579  |
| GM5640 | -3.3575876 |
| GM5665 | -1.7251321 |
| GM568  | -4.635144  |
| GM572  | -4.045461  |
| GM5751 | -1.495352  |
| GM5796 | -2.025329  |
| GM5797 | -1.3160324 |
| GM5800 | -4.2473435 |
| GM5820 | -2.6605844 |
| GM5833 | -0.3828714 |
| GM5849 | -1.1497469 |
| GM5860 | -4.920721  |
| GM5862 | -2.605936  |
| GM5868 | -4.118329  |
| GM5893 | -2.219068  |
| GM590  | -4.4233713 |
| GM5901 | -2.0592568 |
| GM5916 | -2.958661  |
| GM5925 | -2.5915413 |
| GM5936 | -3.1628938 |
| GM5938 | -2.8464274 |
| GM595  | -3.700124  |
| GM5953 | -3.6116576 |
| GM5958 | -2.8817215 |
| GM597  | -0.7892585 |
| GM6042 | -3.3584676 |
| GM609  | -3.8940516 |
| GM6093 | -1.907903  |
| GM6116 | -2.017065  |
| GM6117 | -5.727023  |
| GM614  | -3.198042  |
| GM6145 | -3.0374422 |
| GM6219 | -3.8476    |
| GM6225 | -2.279861  |
| GM6260 | -2.3801186 |
| GM6268 | -2.381391  |
| GM6277 | -2.434768  |
| GM6287 | -3.3049312 |
| GM6289 | -3.2282565 |
| GM6307 | -4.0510874 |
| GM6309 | -2.276451  |

|        |            |
|--------|------------|
| GM6329 | -2.297769  |
| GM6360 | -2.5082436 |
| GM6370 | -2.3348145 |
| GM6416 | -2.5060182 |
| GM6460 | -1.9527202 |
| GM6484 | -1.6484549 |
| GM6537 | -2.9542215 |
| GM6556 | -3.3091347 |
| GM6566 | -4.995244  |
| GM6567 | -1.9461637 |
| GM6590 | -3.173317  |
| GM6614 | -6.09486   |
| GM6639 | -3.796514  |
| GM6654 | -1.0840125 |
| GM6696 | -1.1586988 |
| GM6713 | -4.2555356 |
| GM6729 | -1.6285446 |
| GM6756 | -0.2788546 |
| GM6760 | -4.6931095 |
| GM6787 | -3.9173489 |
| GM6818 | -5.4409733 |
| GM684  | -2.6857157 |
| GM6846 | -3.194965  |
| GM6880 | -1.1995182 |
| GM6936 | -2.0233767 |
| GM694  | -4.167659  |
| GM6943 | -4.1327043 |
| GM6958 | -2.3614974 |
| GM7056 | -2.0500724 |
| GM7068 | -1.249085  |
| GM7104 | -4.2315416 |
| GM7133 | -2.7960317 |
| GM7134 | -3.4245963 |
| GM715  | -2.7737713 |
| GM7167 | -8.299361  |
| GM7168 | -1.832066  |
| GM7244 | -1.5017853 |
| GM7257 | -4.1730585 |
| GM7271 | -2.0348866 |
| GM7276 | -2.787005  |
| GM7285 | -1.863095  |
| GM732  | -4.5746155 |
| GM7420 | -1.7965899 |
| GM7444 | -3.2616193 |
| GM7457 | -2.5354047 |

|        |            |
|--------|------------|
| GM7467 | -3.2624063 |
| GM7480 | -2.523787  |
| GM7489 | -3.5467477 |
| GM7534 | -5.076448  |
| GM7538 | -2.6144018 |
| GM7544 | -2.0591636 |
| GM7562 | -2.449469  |
| GM7596 | -4.2246017 |
| GM7616 | -3.135092  |
| GM7628 | -3.636126  |
| GM7644 | -2.7170439 |
| GM766  | -3.281992  |
| GM7710 | -1.5486023 |
| GM7714 | -4.277441  |
| GM7827 | -2.0015302 |
| GM7849 | -4.929921  |
| GM7894 | -4.960598  |
| GM7904 | -3.4755664 |
| GM7931 | -0.9834881 |
| GM7932 | -3.3523972 |
| GM7972 | -3.9597037 |
| GM7978 | -4.8494387 |
| GM7980 | -4.514676  |
| GM8005 | -1.2861657 |
| GM8013 | -2.528907  |
| GM805  | -2.5891302 |
| GM806  | -2.6235545 |
| GM8075 | -1.7614932 |
| GM8094 | -4.8965707 |
| GM8140 | -2.3363888 |
| GM8149 | -4.8178496 |
| GM8165 | -3.335743  |
| GM8212 | -4.370299  |
| GM8220 | -2.0812852 |
| GM8256 | -3.5044692 |
| GM826  | -2.001555  |
| GM833  | -0.9551172 |
| GM8369 | -2.2597802 |
| GM8439 | -3.5798032 |
| GM8479 | -1.7380974 |
| GM8493 | -1.0592103 |
| GM8505 | -1.7702098 |
| GM8579 | -2.432207  |
| GM8587 | -0.6831899 |
| GM8633 | -0.7502527 |

|        |            |
|--------|------------|
| GM867  | -4.5198803 |
| GM8672 | -4.3774214 |
| GM8674 | -4.915433  |
| GM8702 | -2.762043  |
| GM8817 | -5.213969  |
| GM884  | -3.7571065 |
| GM904  | -4.2298703 |
| GM9047 | -3.3030884 |
| GM9054 | -1.5032122 |
| GM9099 | -1.912549  |
| GM9112 | -2.8932943 |
| GM9258 | -1.3051283 |
| GM9325 | -2.7595243 |
| GM9376 | -5.332135  |
| GM9465 | -3.039721  |
| GM9513 | -3.1514332 |
| GM9530 | -1.0375817 |
| GM9548 | -3.7382975 |
| GM9558 | -2.3362377 |
| GM9573 | -3.957778  |
| GM960  | -2.7569788 |
| GM973  | -2.6001492 |
| GM9733 | -3.1671772 |
| GM9734 | -1.4377921 |
| GM9744 | -1.4467092 |
| GM9758 | -3.3380704 |
| GM9767 | -4.379287  |
| GM9776 | -2.3520257 |
| GM9777 | -3.8565142 |
| GM9779 | -3.3701358 |
| GM9789 | -3.7261784 |
| GM9804 | -1.1163912 |
| GM9831 | -2.2922702 |
| GM9860 | -3.462207  |
| GM9866 | -2.8719835 |
| GM9869 | -3.1173582 |
| GM9871 | -4.203532  |
| GM9873 | -3.550217  |
| GM9876 | -2.2079585 |
| GM9878 | -2.621574  |
| GM9902 | -3.857739  |
| GM9910 | -1.1153135 |
| GM9914 | -3.0044637 |
| GM9917 | -2.6731498 |
| GM9918 | -3.0286882 |

|        |            |
|--------|------------|
| GM9919 | -2.3183825 |
| GM9928 | -4.481199  |
| GM9937 | -4.890285  |
| GM9948 | -1.7863531 |
| GM9951 | -4.032154  |
| GM9958 | -2.5813878 |
| GM9959 | -3.8883812 |
| GM996  | -2.8785641 |
| GM9960 | -2.4672246 |
| GM9962 | -5.719945  |
| GM9963 | -1.7313387 |
| GM9973 | -3.1932244 |
| GM9979 | -2.3766475 |
| GM9984 | -4.6280274 |
| GML    | -2.6361954 |
| GMNC   | -3.388848  |
| GMNN   | -1.8308091 |
| GMPR   | -3.3228698 |
| GNA14  | -4.583281  |
| GNA15  | -2.1552286 |
| GNAI1  | -2.084995  |
| GNAO1  | -3.1384392 |
| GNAT3  | -1.350457  |
| GNAZ   | -3.5448718 |
| GNB3   | -2.5330825 |
| GNB4   | -1.4920967 |
| GNG11  | -2.1666396 |
| GNG13  | -5.381052  |
| GNG2   | -0.9715035 |
| GNG3   | -2.6467586 |
| GNG7   | -0.8764422 |
| GNGT1  | -2.966694  |
| GNGT2  | -0.3130901 |
| GNRHR  | -3.446246  |
| GON4L  | -2.7396338 |
| GP1BA  | -4.060013  |
| GP1BB  | -3.704181  |
| GP2    | -3.4657974 |
| GP5    | -4.561072  |
| GP9    | -4.4123173 |
| GPAT2  | -0.995312  |
| GPBAR1 | -4.178072  |
| GPC1   | -2.2471216 |
| GPC2   | -3.2875834 |
| GPC3   | -2.8033957 |



|            |            |
|------------|------------|
| GPC5       | -2.1907725 |
| GPC6       | -2.6897671 |
| GPFR1      | -8.313471  |
| GPHA2      | -1.0783119 |
| GPIHBP1    | -1.602802  |
| GPLD1      | -1.9203682 |
| GPM6A      | -6.062023  |
| GPM6B      | -0.9602029 |
| GPR101     | -3.4812818 |
| GPR111     | -4.4325504 |
| GPR112     | -1.1427112 |
| GPR114     | -1.8142078 |
| GPR115     | -5.9183917 |
| GPR116     | -1.5640991 |
| GPR123     | -3.8559053 |
| GPR124     | -2.3174715 |
| GPR126     | -2.027704  |
| GPR132     | -0.4439333 |
| GPR133     | -2.635024  |
| GPR135     | -5.1266127 |
| GPR137B    | -1.1189563 |
| GPR137B-PS | -1.1804922 |
| GPR137C    | -3.9928396 |
| GPR139     | -2.1920247 |
| GPR142     | -3.3171482 |
| GPR143     | -3.480105  |
| GPR15      | -3.3621721 |
| GPR151     | -1.5284    |
| GPR152     | -2.5520015 |
| GPR153     | -2.094912  |
| GPR155     | -1.2095778 |
| GPR160     | -1.1494668 |
| GPR161     | -3.2025042 |
| GPR162     | -2.3413393 |
| GPR174     | -1.2695467 |
| GPR179     | -4.137962  |
| GPR180     | -2.7773337 |
| GPR183     | -3.48455   |
| GPR21      | -3.6522722 |
| GPR25      | -1.659692  |
| GPR27      | -4.6506004 |
| GPR33      | -1.777482  |
| GPR34      | -2.2909775 |
| GPR35      | -2.6430528 |
| GPR37L1    | -3.9251323 |

|         |            |
|---------|------------|
| GPR4    | -2.347374  |
| GPR45   | -3.0616412 |
| GPR56   | -0.6279619 |
| GPR61   | -4.8693123 |
| GPR63   | -2.6520648 |
| GPR68   | -3.299074  |
| GPR88   | -4.5405326 |
| GPR89   | -0.3522432 |
| GPR97   | -0.7230451 |
| GPR98   | -2.0004697 |
| GPRASP1 | -0.7854407 |
| GPRASP2 | -2.2501132 |
| GPRC5A  | -1.3699157 |
| GPRC5D  | -1.5260406 |
| GPRC6A  | -3.2741623 |
| GPRIN2  | -1.1278448 |
| GPRIN3  | -1.6360428 |
| GPSM1   | -1.5482497 |
| GPSM3   | -0.6163819 |
| GPX2    | -4.8561482 |
| GPX3    | -2.792599  |
| GPX6    | -4.066255  |
| GPX7    | -1.6451037 |
| GPX8    | -3.0529494 |
| GRAMD1B | -0.5733125 |
| GRAMD2  | -3.9453647 |
| GRAP    | -1.2823741 |
| GRAP2   | -2.5817504 |
| GRB10   | -1.6439688 |
| GRCC10  | -0.4390566 |
| GREB1   | -2.0408092 |
| GRHL2   | -5.6071396 |
| GRIA1   | -3.607539  |
| GRIA3   | -3.388242  |
| GRID2   | -2.7025821 |
| GRID2IP | -1.5071383 |
| GRIFIN  | -3.3796384 |
| GRIK2   | -2.6480649 |
| GRIK4   | -3.740601  |
| GRIN1   | -1.0009003 |
| GRIN2A  | -3.0978386 |
| GRIN2B  | -2.6132207 |
| GRIN2C  | -3.130915  |
| GRIN2D  | -3.9518013 |
| GRIN3B  | -2.1441305 |

|         |            |
|---------|------------|
| GRIP1   | -2.624764  |
| GRIP2   | -4.0425825 |
| GRK1    | -2.8324559 |
| GRK5    | -1.2298374 |
| GRM1    | -2.9060202 |
| GRM4    | -3.6316257 |
| GRM5    | -1.7914331 |
| GRM8    | -1.312283  |
| GRPR    | -4.6398735 |
| GRRP1   | -3.0351405 |
| GRXCR2  | -2.785703  |
| GSAP    | -0.4571707 |
| GSDMA3  | -3.399554  |
| GSDMC4  | -5.0121417 |
| GSDMCL1 | -1.0994418 |
| GSDMCL2 | -5.929964  |
| GSG1    | -4.4505415 |
| GSG1L   | -4.3923454 |
| GSN     | -5.0208607 |
| GSTA4   | -2.139278  |
| GSTM1   | -0.3939712 |
| GSTM7   | -3.070189  |
| GSTO2   | -1.9373143 |
| GSX2    | -3.1730242 |
| GTF2A1L | -2.8628953 |
| GTPBP3  | -1.7460914 |
| GUCY1A2 | -3.83785   |
| GUCY1A3 | -3.9472916 |
| GUCY1B2 | -2.0337627 |
| GUCY1B3 | -3.2536077 |
| GUCY2E  | -3.3257394 |
| GUCY2F  | -3.5981655 |
| GUF1    | -1.3147385 |
| GULP1   | -3.9510915 |
| GYG     | -0.5898774 |
| GYKL1   | -4.6250787 |
| GZMA    | -0.9967954 |
| GZMC    | -0.8345211 |
| GZME    | -2.9092112 |
| GZMK    | -0.4442842 |
| GZMM    | -4.3132176 |
| H1FOO   | -5.376087  |
| H1FX    | -3.8337502 |
| H2-AA   | -0.6046169 |
| H2-AB1  | -0.9148462 |

|          |            |
|----------|------------|
| H2AFB2   | -4.011138  |
| H2AFY3   | -1.2638559 |
| H2BFM    | -2.2907796 |
| H2-DMA   | -7.1505904 |
| H2-DMB1  | -2.1257384 |
| H2-DMB2  | -1.9394491 |
| H2-EA-PS | -1.2262926 |
| H2-EB1   | -1.5659902 |
| H2-EB2   | -2.0330358 |
| H2-M1    | -2.947433  |
| H2-M10.2 | -2.5690992 |
| H2-M10.4 | -2.8015583 |
| H2-M9    | -1.637775  |
| H2-OA    | -1.0264516 |
| H2-OB    | -2.4911797 |
| H2-T18   | -2.9834757 |
| H2-T24   | -0.7686567 |
| H2-T3    | -2.4826126 |
| H60C     | -2.68692   |
| HAND1    | -1.7929802 |
| HAPLN3   | -3.0805893 |
| HAS2     | -3.0236568 |
| HAS2OS   | -2.6676097 |
| HAS3     | -4.567337  |
| HAVCR1   | -0.3866439 |
| HAVCR2   | -2.3531065 |
| HBB-BH2  | -3.2613437 |
| HBQ1A    | -4.319727  |
| HBQ1B    | -1.1177354 |
| HCFC1R1  | -0.3367236 |
| HCN3     | -4.2937374 |
| HCN4     | -2.3927839 |
| HCRT     | -4.453656  |
| HCRTR1   | -1.3347309 |
| HCRTR2   | -3.2886555 |
| HCST     | -0.7618372 |
| HDAC6    | -0.4958713 |
| HDAC7    | -0.997206  |
| HDGFRP3  | -1.7137799 |
| HDHD1A   | -4.3632803 |
| HDHD3    | -0.5438235 |
| HEATR9   | -5.364872  |
| HEBP2    | -2.0647087 |
| HECW2    | -2.5037851 |
| HEMK1    | -1.349668  |

|             |            |
|-------------|------------|
| HEMT1       | -0.830298  |
| HEPACAM2    | -3.9682982 |
| HEPH        | -2.62569   |
| HEPHL1      | -4.187635  |
| HES1        | -2.0277073 |
| HES2        | -2.299825  |
| HES3        | -1.5404475 |
| HES5        | -2.476302  |
| HES7        | -0.9242475 |
| HEY1        | -6.4255486 |
| HEYL        | -4.842219  |
| HHATL       | -4.5937634 |
| HHIP        | -0.4991288 |
| HHIPL1      | -3.088714  |
| HHLA1       | -3.985444  |
| HIF3A       | -2.1564672 |
| HIGD1B      | -4.756172  |
| HILS1       | -3.685193  |
| HIP1        | -1.688082  |
| HIST1H1A    | -0.4670072 |
| HIST1H1B    | -1.7831979 |
| HIST1H1D    | -2.5097568 |
| HIST1H1E    | -0.4382703 |
| HIST1H1T    | -6.5884285 |
| HIST1H2AA   | -0.5314262 |
| HIST1H2AB   | -1.1593177 |
| HIST1H2AG   | -0.9833043 |
| HIST1H2AN   | -0.6608899 |
| HIST1H2AO   | -1.0018928 |
| HIST1H2BB   | -2.2169116 |
| HIST1H2BE   | -0.8534737 |
| HIST1H2BP   | -3.2083385 |
| HIST1H3F    | -0.7379053 |
| HIST1H3G    | -3.078639  |
| HIST1H3I    | -2.8528988 |
| HIST2H2BB   | -0.7574611 |
| HIST2H2BE   | -0.9619694 |
| HIST2H3B    | -0.7947357 |
| HIST3H2BB-P | -2.1692173 |
| HIVEP3      | -4.406503  |
| HKDC1       | -1.2242594 |
| HLX         | -1.1087496 |
| HMBOX1      | -1.2313924 |
| HMCN1       | -4.3715806 |
| HMGA2-PS1   | -2.4856524 |

|          |            |
|----------|------------|
| HMGB4    | -5.3689322 |
| HMGB4OS  | -2.5610993 |
| HMGCLL1  | -2.5400772 |
| HMGN3    | -2.3472655 |
| HMHA1    | -1.1115057 |
| HMX1     | -1.2877259 |
| HMX2     | -5.513782  |
| HNF4G    | -2.0585628 |
| HNMT     | -1.6015816 |
| HOMER3   | -0.6539094 |
| HOPX     | -2.8228476 |
| HORMAD2  | -1.6865296 |
| HOXA1    | -1.3311148 |
| HOXA11OS | -1.9951012 |
| HOXA13   | -4.096681  |
| HOXA2    | -2.1330543 |
| HOXA3    | -1.8140795 |
| HOXA4    | -0.8582336 |
| HOXA5    | -3.5127008 |
| HOXA6    | -4.8823347 |
| HOXA7    | -2.2837029 |
| HOXB2    | -1.3403919 |
| HOXB4    | -1.2697828 |
| HOXB5    | -3.0427306 |
| HOXB5OS  | -4.4193735 |
| HOXB6    | -3.8642452 |
| HOXB7    | -1.7252564 |
| HOXC10   | -6.542216  |
| HOXC11   | -2.6677885 |
| HOXC12   | -3.816959  |
| HOXC4    | -3.4492745 |
| HOXC5    | -4.921961  |
| HOXC6    | -2.5885444 |
| HOXC9    | -2.7521973 |
| HOXD10   | -4.260543  |
| HOXD11   | -3.0194755 |
| HOXD3    | -2.8414893 |
| HOXD3OS1 | -3.9296687 |
| HOXD4    | -2.5396166 |
| HOXD8    | -2.1800454 |
| HPCAL4   | -3.7226095 |
| HPDL     | -3.5484877 |
| HPGD     | -2.1664722 |
| HPS1     | -1.1458445 |
| HPSE2    | -2.9798765 |

|          |            |
|----------|------------|
| HRASLS5  | -3.9713926 |
| HRC      | -3.0250027 |
| HRCT1    | -2.3103974 |
| HRH1     | -1.7559757 |
| HRH3     | -4.0501556 |
| HRH4     | -1.7360735 |
| HRK      | -2.0847702 |
| HRNR     | -3.4610584 |
| HS3ST1   | -2.645169  |
| HS3ST3A1 | -2.5472112 |
| HS3ST6   | -1.9427075 |
| HS6ST2   | -3.6260328 |
| HSBP1L1  | -2.0001004 |
| HSD17B1  | -1.7669361 |
| HSD17B14 | -0.4837623 |
| HSD3B6   | -3.1064925 |
| HSF4     | -0.8822789 |
| HSFY2    | -4.1048536 |
| HSH2D    | -1.5027418 |
| HSPA12B  | -3.180651  |
| HSPA1L   | -2.2340455 |
| HSPB1    | -1.8392384 |
| HSPB2    | -3.765553  |
| HSPB3    | -2.607895  |
| HSPB6    | -0.9284604 |
| HSPB7    | -5.119361  |
| HSPB9    | -2.4466789 |
| HSPG2    | -1.7200682 |
| HTR1A    | -3.2771907 |
| HTR1F    | -3.8532763 |
| HTR2A    | -4.7265477 |
| HTR2B    | -2.4781227 |
| HTR2C    | -1.7852902 |
| HTR3B    | -2.6585796 |
| HTR4     | -2.8219342 |
| HTR6     | -2.6138234 |
| HTRA1    | -0.5720995 |
| HTRA3    | -2.779904  |
| HVCN1    | -1.0540371 |
| HYAL6    | -3.9230175 |
| HYDIN    | -2.6701226 |
| HYLS1    | -1.3286488 |
| IBSP     | -3.823812  |
| ICA1     | -0.282263  |
| ICAM2    | -1.9542243 |

|           |            |
|-----------|------------|
| ICAM5     | -4.020321  |
| ID1       | -1.0879958 |
| ID4       | -2.357935  |
| IDI2      | -5.1520243 |
| IDS       | -2.264801  |
| IER5      | -0.9980698 |
| IER5L     | -1.4070451 |
| IFI44L    | -2.760892  |
| IFITM10   | -2.8658001 |
| IFLTD1    | -2.8298922 |
| IFNA11    | -4.850772  |
| IFNA13    | -3.3418355 |
| IFNA14    | -2.053518  |
| IFNA16    | -3.1804972 |
| IFNA2     | -1.5419848 |
| IFNA4     | -2.5017169 |
| IFNAB     | -1.5561323 |
| IFNK      | -1.8835324 |
| IFNL3     | -4.358394  |
| IFT74     | -1.4405129 |
| IFT81     | -0.9679773 |
| IFT88OS   | -2.3341362 |
| IGBP1B    | -3.9336739 |
| IGDCC3    | -2.240612  |
| IGF1OS    | -1.1749575 |
| IGF1R     | -2.213868  |
| IGF2BP1   | -1.318541  |
| IGF2OS    | -0.8839679 |
| IGFBP5    | -3.0818183 |
| IGFBP6    | -5.7468176 |
| IGFL3     | -3.658191  |
| IGHV14-2  | -2.020379  |
| IGH-V3660 | -4.198821  |
| IGH-VJ558 | -1.8021286 |
| IGJ       | -1.8798306 |
| IGKV4-53  | -2.1633627 |
| IGKV4-72  | -2.6681926 |
| IGKV6-20  | -2.9062924 |
| IGLL1     | -1.6682739 |
| IGLON5    | -3.0253186 |
| IGLV1     | -1.6973183 |
| IGSF1     | -1.8908675 |
| IGSF10    | -3.6098025 |
| IGSF3     | -1.6917725 |
| IHH       | -4.6452456 |



|         |            |
|---------|------------|
| IIGP1B  | -2.013615  |
| IKZF2   | -1.5422373 |
| IKZF3   | -1.0517216 |
| IL12RB2 | -1.8489907 |
| IL13    | -3.1172824 |
| IL15    | -1.5894089 |
| IL16    | -0.7346735 |
| IL17B   | -4.1241636 |
| IL17C   | -1.0470572 |
| IL17D   | -2.6824498 |
| IL17F   | -2.1244562 |
| IL17RD  | -3.5591102 |
| IL17RE  | -6.2496033 |
| IL18R1  | -3.1141658 |
| IL1BOS  | -3.1893613 |
| IL1F5   | -2.489891  |
| IL1RL1  | -1.3488216 |
| IL1RL2  | -1.2410781 |
| IL20    | -1.2427075 |
| IL22    | -4.077377  |
| IL22RA2 | -3.1353164 |
| IL24    | -2.5066442 |
| IL25    | -6.5983095 |
| IL31    | -3.5756052 |
| IL31RA  | -2.462565  |
| IL34    | -0.7537398 |
| IL4     | -2.6888516 |
| IL5     | -3.266145  |
| IL5RA   | -4.6668553 |
| IL7R    | -0.5416775 |
| IL9R    | -2.2617722 |
| ILD1R1  | -3.3284435 |
| INA     | -1.9124283 |
| INADL   | -0.9204266 |
| INMT    | -6.589997  |
| INO80E  | -0.5300851 |
| INPP5E  | -1.3234992 |
| INPP5J  | -2.758684  |
| INPP5K  | -0.5397418 |
| INS1    | -2.0748682 |
| INS2    | -2.305696  |
| INSL5   | -1.804456  |
| INSM1   | -4.5380564 |
| INSM2   | -2.4241507 |
| INSRR   | -1.0033386 |

|          |            |
|----------|------------|
| INTS1    | -1.3161905 |
| INTS2    | -1.6870251 |
| INTS6    | -1.7272449 |
| IP6K3    | -2.8035214 |
| IPCEF1   | -3.4425569 |
| IQCA     | -3.3456707 |
| IQCD     | -0.9505971 |
| IQCF1    | -3.9366345 |
| IQCF3    | -5.3450584 |
| IQCF4    | -4.6190624 |
| IQCF5    | -2.2766001 |
| IQGAP1   | -0.753144  |
| IQGAP3   | -3.8520222 |
| IQSEC2   | -0.5816901 |
| IQUB     | -3.500036  |
| IRF4     | -1.7695391 |
| IRGC1    | -2.6375394 |
| IRS3     | -3.3102145 |
| IRS4     | -0.5306115 |
| IRX1     | -8.214912  |
| IRX2     | -5.101921  |
| IRX3     | -4.1872663 |
| IRX3OS   | -2.686684  |
| IRX4     | -4.74227   |
| IRX5     | -3.2556856 |
| ISL1     | -3.1460469 |
| ISLR     | -3.329973  |
| ISLR2    | -3.1240826 |
| ISM1     | -5.6660056 |
| ISM2     | -5.3023844 |
| ISOC2B   | -2.1415343 |
| ISPD     | -1.9796957 |
| ITGA11   | -3.6248724 |
| ITGA2B   | -2.6374872 |
| ITGA3    | -3.9975383 |
| ITGA4    | -0.5322883 |
| ITGA6    | -1.2064121 |
| ITGA8    | -8.241262  |
| ITGAD    | -4.3971663 |
| ITGAX    | -3.4337373 |
| ITGB1BP2 | -1.9058647 |
| ITGB2L   | -2.6846042 |
| ITGB4    | -4.454197  |
| ITGB6    | -4.7158966 |
| ITGB7    | -1.7952635 |

|          |            |
|----------|------------|
| ITGB8    | -3.4270377 |
| ITGBL1   | -2.7272542 |
| ITLN1    | -0.7723246 |
| ITM2A    | -3.983726  |
| ITPKA    | -2.323123  |
| ITPR3    | -1.1796105 |
| ITPRIPL1 | -3.4725626 |
| ITPRIPL2 | -1.5783422 |
| IVL      | -5.3558598 |
| IZUMO1   | -5.6103    |
| IZUMO2   | -5.087632  |
| IZUMO4   | -1.1951127 |
| JADE3    | -3.8035088 |
| JAG1     | -1.8097289 |
| JAG2     | -3.8045034 |
| JAKMIP1  | -3.928061  |
| JAKMIP2  | -4.0041018 |
| JAKMIP3  | -4.748972  |
| JAM3     | -0.4149952 |
| JAZF1    | -3.036702  |
| JPH3     | -2.5675907 |
| JPH4     | -4.9177666 |
| JUNOS    | -4.2563243 |
| JUP      | -1.5827518 |
| KALRN    | -0.8394525 |
| KANK2    | -0.9678366 |
| KANK3    | -2.5072658 |
| KANK4    | -3.5595565 |
| KANSL1L  | -4.243514  |
| KAP      | -5.3230543 |
| KATNAL2  | -4.4901342 |
| KAZALD1  | -3.0510428 |
| KAZN     | -2.1951678 |
| KBTBD11  | -2.430563  |
| KBTBD13  | -2.518593  |
| KCNA10   | -2.9899092 |
| KCNA2    | -1.8402988 |
| KCNA3    | -2.3293962 |
| KCNA5    | -2.0576532 |
| KCNA6    | -2.5184062 |
| KCNAB1   | -2.756017  |
| KCNAB2   | -1.5678632 |
| KCNB1    | -1.7552047 |
| KCNB2    | -3.2253308 |
| KCNC1    | -2.9794216 |

|           |            |
|-----------|------------|
| KCNC3     | -3.337859  |
| KCNC4     | -2.8536992 |
| KCND2     | -3.7843378 |
| KCND3     | -2.9360642 |
| KCND3OS   | -2.4797862 |
| KCNE1L    | -0.6394656 |
| KCNE2     | -6.0056696 |
| KCNF1     | -2.9693851 |
| KCNG1     | -3.0865972 |
| KCNG3     | -2.4974835 |
| KCNH1     | -2.9032078 |
| KCNH7     | -2.0347245 |
| KCNH8     | -4.1799226 |
| KCNIP2    | -5.745323  |
| KCNIP3    | -2.0802915 |
| KCNIP4    | -2.6707268 |
| KCNJ10    | -0.3537624 |
| KCNJ11    | -2.1023562 |
| KCNJ12    | -2.80246   |
| KCNJ15    | -3.8444397 |
| KCNJ3     | -2.595623  |
| KCNJ5     | -3.660915  |
| KCNJ6     | -1.1260643 |
| KCNJ9     | -5.4571652 |
| KCNK1     | -3.0994327 |
| KCNK12    | -3.6049397 |
| KCNK15    | -4.9492693 |
| KCNK16    | -4.823161  |
| KCNK18    | -3.6415246 |
| KCNK3     | -4.309755  |
| KCNK4     | -1.1538405 |
| KCNK7     | -3.6229088 |
| KCNK9     | -1.1448591 |
| KCNMA1    | -2.891894  |
| KCNMB2    | -3.2575586 |
| KCNMB4    | -2.8224573 |
| KCNMB4OS2 | -3.5748985 |
| KCNN1     | -4.0029664 |
| KCNN3     | -3.7416015 |
| KCNN4     | -4.4372582 |
| KCNQ1     | -4.51048   |
| KCNQ2     | -2.102223  |
| KCNQ3     | -2.4504354 |
| KCNS1     | -2.7226515 |
| KCNS3     | -5.1417875 |

|         |            |
|---------|------------|
| KCNU1   | -2.147422  |
| KCTD10  | -1.1616938 |
| KCTD12B | -2.417822  |
| KCTD16  | -3.302088  |
| KCTD7   | -6.982626  |
| KDELC2  | -1.9071095 |
| KDM2A   | -0.8959248 |
| KDM3B   | -0.3082423 |
| KDM7A   | -0.9722321 |
| KDR     | -2.0763152 |
| KEG1    | -3.911138  |
| KHDC1C  | -5.62344   |
| KHDRBS2 | -2.0408018 |
| KIF11   | -3.8351672 |
| KIF13B  | -3.284433  |
| KIF14   | -1.9224672 |
| KIF15   | -1.8083735 |
| KIF17   | -2.5744853 |
| KIF18A  | -1.5224848 |
| KIF1A   | -1.4228414 |
| KIF20A  | -1.3856585 |
| KIF23   | -0.9940283 |
| KIF24   | -2.2054353 |
| KIF26B  | -1.0911121 |
| KIF2A   | -1.7656877 |
| KIF2C   | -2.911697  |
| KIF3C   | -0.4509428 |
| KIF4-PS | -2.7273831 |
| KIF5A   | -2.850134  |
| KIF6    | -5.397433  |
| KIF7    | -3.574685  |
| KIF9    | -1.2567258 |
| KIFC1   | -2.0468287 |
| KIFC2   | -1.3302331 |
| KIRREL  | -0.5141456 |
| KIRREL2 | -6.094331  |
| KIRREL3 | -0.6133733 |
| KISS1   | -3.0064628 |
| KISS1R  | -2.938514  |
| KIT     | -1.8121712 |
| KITL    | -4.7792835 |
| KLC1    | -0.7033579 |
| KLC3    | -1.8769999 |
| KLF16   | -0.9403729 |
| KLF17   | -4.087653  |

|         |            |
|---------|------------|
| KLF5    | -3.8502662 |
| KLF8    | -2.7940233 |
| KLHDC1  | -1.5837278 |
| KLHDC7B | -2.2430859 |
| KLHDC8A | -1.8009315 |
| KLHDC8B | -1.2328565 |
| KLHDC9  | -3.1735845 |
| KLHL1   | -9.050742  |
| KLHL13  | -0.8643839 |
| KLHL14  | -0.4407806 |
| KLHL17  | -0.4676926 |
| KLHL23  | -2.9127243 |
| KLHL29  | -2.7358024 |
| KLHL3   | -3.6563723 |
| KLHL30  | -5.0482044 |
| KLHL31  | -4.399263  |
| KLHL32  | -3.030139  |
| KLHL34  | -5.0457006 |
| KLHL38  | -2.027202  |
| KLHL40  | -5.1236057 |
| KLHL5   | -1.2952738 |
| KLHL8   | -0.5006962 |
| KLK1    | -1.0677998 |
| KLK10   | -4.7395644 |
| KLK11   | -4.0958104 |
| KLK12   | -2.6337614 |
| KLK13   | -5.8363957 |
| KLK15   | -2.2022924 |
| KLK1B1  | -4.028584  |
| KLK1B11 | -2.5315268 |
| KLK1B21 | -1.1836617 |
| KLK1B22 | -2.5410807 |
| KLK1B26 | -1.3008506 |
| KLK1B3  | -1.277147  |
| KLK1B4  | -1.8376925 |
| KLK1B5  | -0.7608988 |
| KLK1B8  | -2.9932609 |
| KLK1B9  | -1.7653067 |
| KLK4    | -2.108654  |
| KLK5    | -3.0019603 |
| KLK6    | -2.9318962 |
| KLK8    | -2.6040177 |
| KLK9    | -1.3101897 |
| KLRA10  | -3.4232838 |
| KLRA12  | -2.4994214 |

|           |            |
|-----------|------------|
| KLRA15    | -1.7172675 |
| KLRA16    | -0.8764236 |
| KLRA17    | -3.725551  |
| KLRA22    | -1.5195539 |
| KLRA4     | -2.061107  |
| KLRA7     | -0.7346227 |
| KLRA8     | -1.7003952 |
| KLRB1     | -5.0804253 |
| KLRB1A    | -2.5727825 |
| KLRB1B    | -3.285288  |
| KLRB1C    | -2.4907675 |
| KLRB1-PS1 | -4.627091  |
| KLRC1     | -1.5958316 |
| KLRC3     | -2.0304046 |
| KLRD1     | -1.5753462 |
| KLRE1     | -1.6803117 |
| KLRG1     | -3.85193   |
| KLRG2     | -3.3041434 |
| KLRI1     | -1.2307792 |
| KLRI2     | -2.594686  |
| KLRK1     | -0.539825  |
| KMT2D     | -0.925833  |
| KNDC1     | -4.012495  |
| KNTC1     | -1.5093052 |
| KPRP      | -4.312611  |
| KREMEN2   | -4.8299017 |
| KRT10     | -2.2476308 |
| KRT13     | -1.835263  |
| KRT15     | -5.2426014 |
| KRT19     | -4.0564804 |
| KRT2      | -4.6834383 |
| KRT20     | -4.8402376 |
| KRT23     | -5.072344  |
| KRT24     | -5.269916  |
| KRT26     | -5.356721  |
| KRT27     | -7.145459  |
| KRT28     | -3.283238  |
| KRT33A    | -4.2457156 |
| KRT35     | -3.3769908 |
| KRT36     | -3.0880547 |
| KRT39     | -3.3752775 |
| KRT4      | -5.0200624 |
| KRT40     | -2.4212112 |
| KRT42     | -3.4814978 |
| KRT5      | -3.4113894 |

|           |            |
|-----------|------------|
| KRT6A     | -3.1589112 |
| KRT6B     | -3.7806587 |
| KRT7      | -5.3775673 |
| KRT72     | -4.4958086 |
| KRT74     | -4.6090155 |
| KRT75     | -1.21247   |
| KRT77     | -1.7439306 |
| KRT78     | -3.4040284 |
| KRT79     | -3.5790882 |
| KRT80     | -1.1851668 |
| KRT81     | -4.479799  |
| KRT82     | -2.106734  |
| KRT86     | -3.2185073 |
| KRT9      | -2.9038215 |
| KRTAP10-4 | -3.241869  |
| KRTAP12-1 | -2.364334  |
| KRTAP15   | -3.9224079 |
| KRTAP16-1 | -4.047616  |
| KRTAP16-3 | -3.0073988 |
| KRTAP17-1 | -4.16166   |
| KRTAP19-5 | -2.4619544 |
| KRTAP21-1 | -2.5451164 |
| KRTAP24-1 | -3.7389243 |
| KRTAP26-1 | -2.546883  |
| KRTAP31-2 | -4.979601  |
| KRTAP4-1  | -5.093605  |
| KRTAP4-16 | -1.1672161 |
| KRTAP4-7  | -2.5796218 |
| KRTAP5-4  | -1.9498601 |
| KRTAP5-5  | -1.9406497 |
| KRTAP8-1  | -4.0810456 |
| KRTCAP3   | -2.6451051 |
| KRTDAP    | -3.6473541 |
| KSR1      | -1.2846828 |
| KSR2      | -2.1296985 |
| KY        | -5.4168735 |
| L1CAM     | -2.659653  |
| L3MBTL2   | -2.5146794 |
| LACTBL1   | -3.5918589 |
| LAD1      | -2.6498237 |
| LAIR1     | -1.4454632 |
| LALBA     | -1.1035471 |
| LAMA2     | -3.465304  |
| LAMA3     | -2.8495066 |
| LAMA4     | -1.0895727 |



|         |            |
|---------|------------|
| LAMA5   | -0.6501129 |
| LAMB1   | -1.8115523 |
| LAMB2   | -3.8455422 |
| LAMB3   | -2.4351742 |
| LAMC1   | -0.7833159 |
| LAMC2   | -4.8349314 |
| LAMC3   | -2.823524  |
| LAMP3   | -1.5534174 |
| LAPTM5  | -0.2770588 |
| LARP6   | -3.8850558 |
| LAT     | -3.6835406 |
| LAT2    | -1.9183493 |
| LATS2   | -0.6956918 |
| LAX1    | -4.738757  |
| LAYN    | -1.8749666 |
| LBH     | -2.8789907 |
| LBX1    | -0.5213528 |
| LBX2    | -1.243581  |
| LCA5    | -3.8764155 |
| LCA5L   | -2.272893  |
| LCE1B   | -1.1663954 |
| LCE1C   | -2.489718  |
| LCE1G   | -3.5324411 |
| LCE1H   | -2.3770442 |
| LCE1I   | -3.414012  |
| LCE1J   | -2.2525032 |
| LCE1L   | -2.8587093 |
| LCE1M   | -3.442721  |
| LCE3C   | -2.8434181 |
| LCE3D   | -2.1485822 |
| LCK     | -0.8597372 |
| LCMT1   | -0.4515472 |
| LCN10   | -5.103554  |
| LCN11   | -3.271888  |
| LCN3    | -4.3458557 |
| LCN5    | -3.004811  |
| LCN6    | -0.8335271 |
| LCT     | -2.5450764 |
| LCTL    | -5.4626026 |
| LDB2    | -3.348372  |
| LDB3    | -2.8721259 |
| LDHB    | -3.1034768 |
| LDHC    | -4.1558013 |
| LDLRAD1 | -3.1582334 |
| LDLRAD4 | -3.9671924 |

|          |            |
|----------|------------|
| LDOC1    | -3.942946  |
| LDOC1L   | -0.8818862 |
| LEF1     | -2.7133884 |
| LEFTY1   | -1.1793146 |
| LEKR1    | -1.032953  |
| LELP1    | -1.5081542 |
| LENG1    | -0.7523353 |
| LEO1     | -1.3497055 |
| LEPREL1  | -4.536104  |
| LEPREL2  | -2.0679133 |
| LEPREL4  | -1.3153622 |
| LETM2    | -3.0500183 |
| LFNG     | -1.3172941 |
| LGALS1   | -1.2967694 |
| LGALS12  | -2.017664  |
| LGI2     | -2.1380777 |
| LGI3     | -7.3219986 |
| LGI4     | -1.0218732 |
| LGR6     | -1.7452502 |
| LHB      | -1.8385193 |
| LHFP     | -1.993629  |
| LHFPL2   | -0.5061526 |
| LHX1     | -3.9375927 |
| LHX4     | -3.4533415 |
| LHX9     | -1.856807  |
| LIF      | -4.6112194 |
| LILRA5   | -0.9579209 |
| LIM2     | -4.090988  |
| LIMCH1   | -7.850774  |
| LIMD2    | -0.6235931 |
| LIMK2    | -1.8675921 |
| LIN28B   | -2.4459312 |
| LIN7B    | -2.0237143 |
| LINGO3   | -3.2857697 |
| LIPE     | -1.9800329 |
| LIPF     | -4.7581415 |
| LIPG     | -2.0910778 |
| LIPH     | -4.2552834 |
| LIPO4    | -3.9295497 |
| LIX1     | -4.8003263 |
| LKAAEAR1 | -3.9427686 |
| LMBR1    | -1.16886   |
| LMCD1    | -1.724783  |
| LMNB1    | -1.0117607 |
| LMO1     | -3.1233196 |

|             |            |
|-------------|------------|
| LMO7        | -2.6697695 |
| LMOD1       | -1.7030354 |
| LMOD2       | -2.1359842 |
| LMOD3       | -0.4403493 |
| LMTK3       | -0.9091461 |
| LMX1B       | -3.6939235 |
| LOC10004170 | -0.8822024 |
| LOC10050250 | -3.0039625 |
| LOC10050300 | -5.420265  |
| LOC10086210 | -2.9164352 |
| LOC10105560 | -4.260281  |
| LOC10105570 | -2.717997  |
| LOC10105580 | -1.0917535 |
| LOC10105580 | -1.8468437 |
| LOC10105590 | -4.4333086 |
| LOC10105590 | -4.1991863 |
| LOC10105590 | -3.2550192 |
| LOC10263180 | -3.5706482 |
| LOC10263210 | -2.713333  |
| LOC10263220 | -2.1407332 |
| LOC10263240 | -4.0537844 |
| LOC10263280 | -1.3861495 |
| LOC10263300 | -2.3326468 |
| LOC10263310 | -3.7536902 |
| LOC10263330 | -2.9368331 |
| LOC10263340 | -2.8327096 |
| LOC10263360 | -0.3085673 |
| LOC10263370 | -4.7976747 |
| LOC10263380 | -3.5376034 |
| LOC10263410 | -2.4712121 |
| LOC10263450 | -2.437786  |
| LOC10263460 | -3.2030597 |
| LOC10263520 | -5.149336  |
| LOC10263530 | -3.9268084 |
| LOC10263550 | -4.235448  |
| LOC10263560 | -1.6042166 |
| LOC10263600 | -4.7669945 |
| LOC10263610 | -2.5542543 |
| LOC10263620 | -1.421519  |
| LOC10263670 | -1.709872  |
| LOC10263670 | -3.1074152 |
| LOC10263690 | -3.5808    |
| LOC10263690 | -0.7186196 |
| LOC10263700 | -2.9961903 |
| LOC10263770 | -2.8736246 |

LOC1026379: -2.6492345  
LOC1026380: -2.2866216  
LOC1026385: -1.3124914  
LOC1026386: -3.2052352  
LOC1026387: -4.236853  
LOC1026388: -1.3478167  
LOC1026388: -1.9227706  
LOC1026389: -0.82099  
LOC1026389: -2.8343291  
LOC1026396: -3.3989317  
LOC1026397: -3.0956578  
LOC1026398: -0.7710559  
LOC1026398: -4.526987  
LOC1026405: -1.8038297  
LOC1026412: -2.27122  
LOC1026412: -3.9355183  
LOC1026413: -2.6161354  
LOC1026416: -2.3664436  
LOC1026416: -2.7524548  
LOC1026417: -3.3807104  
LOC1026418: -2.01775  
LOC1026420: -4.0081854  
LOC1026420: -1.728405  
LOC1026420: -4.0218873  
LOC1026421: -2.3700576  
LOC1026422: -3.424786  
LOC1026423: -2.294404  
LOC1026424: -3.0503912  
LOC1026424: -2.8927307  
LOC1026425: -3.0620253  
LOC1026425: -1.8691819  
LOC1026426: -3.735645  
LOC1026427: -0.8480735  
LOC1026429: -1.3742163  
LOC1026429: -1.6756697  
LOC1026431: -5.417712  
LOC1026431: -3.4229212  
LOC106740: -1.379709  
LOC171588: -2.5752413  
LOR: -2.1542497  
LOX: -0.5465212  
LOXHD1: -4.1704006  
LOXL3: -2.072489  
LPAR2: -1.6812351  
LPAR3: -2.2735243

|         |            |
|---------|------------|
| LPAR4   | -5.41503   |
| LPCAT1  | -2.6819642 |
| LPCAT2B | -3.461761  |
| LPHN1   | -3.8642168 |
| LPHN2   | -2.843385  |
| LPHN3   | -2.6204123 |
| LPL     | -1.0323675 |
| LRCH3   | -4.658965  |
| LRFN1   | -1.3663366 |
| LRFN4   | -2.2628276 |
| LRFN5   | -3.1568437 |
| LRGUK   | -2.6944318 |
| LRIT2   | -1.5302715 |
| LRP1B   | -3.4505334 |
| LRP2    | -4.9747267 |
| LRR1    | -4.2326765 |
| LRRC1   | -3.0756369 |
| LRRC10B | -3.631272  |
| LRRC16A | -1.5695045 |
| LRRC16B | -3.3600457 |
| LRRC18  | -1.9368072 |
| LRRC23  | -7.678857  |
| LRRC26  | -6.6120706 |
| LRRC29  | -1.0023384 |
| LRRC30  | -1.7329993 |
| LRRC34  | -3.271532  |
| LRRC36  | -3.082864  |
| LRRC4   | -3.4226708 |
| LRRC45  | -0.7816403 |
| LRRC46  | -2.0697436 |
| LRRC49  | -3.301142  |
| LRRC4B  | -3.8481426 |
| LRRC4C  | -3.1939557 |
| LRRC51  | -1.9133334 |
| LRRC56  | -0.8995385 |
| LRRC57  | -0.4632616 |
| LRRC6   | -4.1194196 |
| LRRC63  | -1.6260469 |
| LRRC7   | -1.2792227 |
| LRRC71  | -4.552285  |
| LRRC73  | -2.9223342 |
| LRRC74  | -5.867107  |
| LRRC75B | -0.8343899 |
| LRRC8B  | -1.7553713 |
| LRRC8E  | -1.9043076 |

|         |            |
|---------|------------|
| LRRIQ3  | -1.2536345 |
| LRRIQ4  | -5.591029  |
| LRRK1   | -0.4922335 |
| LRRK2   | -1.9186444 |
| LRRN2   | -2.833598  |
| LRRN3   | -4.355873  |
| LRRN4CL | -2.7589006 |
| LRRTM1  | -1.2057192 |
| LRRTM2  | -3.6107852 |
| LRTM1   | -2.4547    |
| LSMEM2  | -1.4129949 |
| LSP1    | -1.645139  |
| LTA     | -5.1763725 |
| LTBP1   | -2.8871298 |
| LTBP2   | -5.432625  |
| LTBP3   | -3.6868906 |
| LTBP4   | -3.2216163 |
| LTC4S   | -2.0519316 |
| LTK     | -5.372281  |
| LURAP1  | -1.6443353 |
| LUZP2   | -2.6404788 |
| LXN     | -2.3062742 |
| LY6F    | -1.4607813 |
| LY6G5B  | -2.2455065 |
| LY6G6C  | -2.9316158 |
| LY6G6D  | -4.661375  |
| LY6G6E  | -3.4115987 |
| LY6I    | -1.5186837 |
| LY75    | -1.5023336 |
| LY9     | -0.9017141 |
| LYG2    | -4.452819  |
| LYL1    | -1.3006165 |
| LYNX1   | -3.5652301 |
| LYPD2   | -3.4287517 |
| LYPD3   | -3.0394814 |
| LYPD6   | -2.3539758 |
| LYPD6B  | -3.668476  |
| LYPD8   | -3.6037521 |
| LYRM9   | -2.0759292 |
| LYSMD2  | -1.2844174 |
| LYST    | -1.9885411 |
| LYZ1    | -1.950383  |
| LYZ2    | -2.2944791 |
| LYZL1   | -3.9962087 |
| LYZL4   | -3.2666996 |

|           |            |
|-----------|------------|
| LYZL6     | -2.5102262 |
| LZTS1     | -2.2419229 |
| LZTS2     | -1.011493  |
| M1AP      | -3.059508  |
| MAATS1    | -3.3472908 |
| MAB21L2   | -1.4061024 |
| MAB21L3   | -1.5643976 |
| MACC1     | -5.2097993 |
| MACF1     | -1.3507245 |
| MACROD2OS | -3.3633847 |
| MAD2L1    | -1.7166672 |
| MADCAM1   | -1.4309137 |
| MAEL      | -5.6260233 |
| MAGEA1    | -3.6765928 |
| MAGEA10   | -4.4789577 |
| MAGEA3    | -1.5754328 |
| MAGEA5    | -5.869891  |
| MAGEA6    | -1.1518874 |
| MAGEA8    | -2.092246  |
| MAGEB1    | -3.6348376 |
| MAGEB3    | -1.9250314 |
| MAGEE1    | -1.3695502 |
| MAGEE2    | -3.228991  |
| MAGI2     | -3.7987862 |
| MAGI3     | -1.3686116 |
| MAGIX     | -1.6133938 |
| MAL       | -3.8001506 |
| MAL2      | -1.916673  |
| MALL      | -4.296649  |
| MAMDC2    | -5.1444244 |
| MAMDC4    | -1.8232815 |
| MAML2     | -2.5938885 |
| MAML3     | -2.1035151 |
| MAMLD1    | -3.327628  |
| MAMSTR    | -1.6738758 |
| MAN2C1OS  | -0.5876803 |
| MANEAL    | -4.637903  |
| MAOA      | -0.6785317 |
| MAP10     | -2.157681  |
| MAP1A     | -3.2084076 |
| MAP1LC3A  | -0.4138582 |
| MAP2      | -4.4993253 |
| MAP2K6    | -0.7079897 |
| MAP2K7    | -1.1176784 |
| MAP3K10   | -3.0419981 |

|          |            |
|----------|------------|
| MAP3K19  | -3.4256306 |
| MAP3K7CL | -2.5985105 |
| MAP3K9   | -2.8850524 |
| MAP4K1   | -0.6238229 |
| MAP4K2   | -0.935869  |
| MAP6     | -3.866685  |
| MAP7D2   | -2.7646103 |
| MAPK10   | -4.2220182 |
| MAPK12   | -1.2323401 |
| MAPK13   | -0.6962302 |
| MAPK15   | -2.1615164 |
| MAPK3    | -1.1688054 |
| MAPK8    | -8.704477  |
| MAPK8IP1 | -2.6412046 |
| MAPK8IP2 | -1.9615048 |
| MAPKBP1  | -1.9025948 |
| MAPT     | -5.1591263 |
| MARVELD1 | -2.1569676 |
| MAS1     | -2.6196017 |
| MAST1    | -3.1189647 |
| MAST4    | -0.7169478 |
| MASTL    | -1.3589039 |
| MATK     | -2.6358244 |
| MATN4    | -6.9401855 |
| MB       | -5.3046217 |
| MB21D1   | -0.5994327 |
| MBD5     | -1.7232993 |
| MBIP     | -0.5316045 |
| MBLAC2   | -0.6855614 |
| MBNL1    | -0.6089242 |
| MBNL3    | -2.4777837 |
| MBOAT1   | -2.3861248 |
| MBOAT2   | -3.1759145 |
| MBP      | -2.494966  |
| MC5R     | -1.5897331 |
| MCC      | -2.0046394 |
| MCF2L    | -2.484883  |
| MCHR1    | -3.7652888 |
| MCIDAS   | -0.4232886 |
| MCM2     | -0.5809555 |
| MCM8     | -1.422184  |
| MCM9     | -0.7642436 |
| MCOLN3   | -2.7762468 |
| MCPT4    | -3.0045786 |
| MCPT8    | -3.6533663 |



|           |            |
|-----------|------------|
| MCPT9     | -6.3238544 |
| MCPT-PS1  | -3.5942292 |
| MDGA2     | -2.482857  |
| MDH1B     | -3.5831118 |
| MDK       | -1.2151833 |
| MDM1      | -1.2955263 |
| ME3       | -2.32049   |
| MECOM     | -1.6384155 |
| MED12L    | -0.892616  |
| MED18     | -1.3361042 |
| MED9OS    | -1.6988355 |
| MEF2C     | -2.6513093 |
| MEG3      | -1.4244182 |
| MEGF10    | -2.0023723 |
| MEGF11    | -2.5761702 |
| MEGF6     | -3.1056285 |
| MEI1      | -4.8220625 |
| MEIG1     | -4.8343215 |
| MEIS1     | -1.8788412 |
| MEIS3     | -1.463882  |
| MEOX1     | -5.0233946 |
| MEOX2     | -6.4802194 |
| MESP1     | -2.2507215 |
| MESP2     | -1.7104964 |
| MEST      | -2.9372253 |
| METRN     | -0.9243064 |
| METTLL11B | -5.160274  |
| METTLL13  | -4.155986  |
| METTLL24  | -5.190866  |
| METTLL7A1 | -1.6810949 |
| METTLL8   | -2.3322437 |
| MEX3A     | -4.543232  |
| MEX3B     | -2.2857566 |
| MFAP2     | -5.6847878 |
| MFAP3L    | -3.1675751 |
| MFAP4     | -9.124962  |
| MFAP5     | -7.7714376 |
| MFGE8     | -1.4851997 |
| MFNG      | -2.6375346 |
| MFSD6L    | -1.8008116 |
| MFSD7A    | -0.71176   |
| MFSD9     | -1.9643464 |
| MGAT3     | -4.0536466 |
| MGAT4C    | -3.9241645 |
| MGLL      | -0.8470886 |

|          |            |
|----------|------------|
| MGP      | -5.9103727 |
| MGST2    | -1.0178144 |
| MGST3    | -1.2488344 |
| MIA      | -3.2831297 |
| MICAL1   | -1.3229783 |
| MICAL2   | -1.9987669 |
| MICALCL  | -3.7659678 |
| MICU3    | -1.756958  |
| MID1IP1  | -1.3089178 |
| MID2     | -1.984256  |
| MIEF2    | -0.611119  |
| MILL2    | -3.947464  |
| MIPOL1   | -2.1753743 |
| MIRG     | -1.467751  |
| MIS18A   | -1.6704493 |
| MIS18BP1 | -1.8006978 |
| MISP     | -5.641671  |
| MIXL1    | -2.48403   |
| MKNK1    | -1.3142271 |
| MKRN2    | -0.8722992 |
| MLANA    | -4.8457813 |
| MLC1     | -4.0565815 |
| MLF1     | -3.3798113 |
| MLIP     | -4.521566  |
| MLLT3    | -1.7176476 |
| MLPH     | -2.2372339 |
| MMP10    | -3.305223  |
| MMP11    | -4.738107  |
| MMP12    | -0.600235  |
| MMP15    | -4.682113  |
| MMP17    | -1.0648894 |
| MMP2     | -3.9207063 |
| MMP21    | -2.5388186 |
| MMP23    | -3.0386102 |
| MMP24    | -1.2646745 |
| MMRN1    | -2.6371326 |
| MNAT1    | -0.3843639 |
| MNS1     | -4.5695763 |
| MOBP     | -2.4921484 |
| MOGAT1   | -2.5241435 |
| MORC2B   | -3.022321  |
| MORN1    | -1.1127384 |
| MORN2    | -1.1627846 |
| MORN3    | -2.795894  |
| MORN5    | -3.5854745 |

|          |            |
|----------|------------|
| MOS      | -2.8658886 |
| MOV10L1  | -2.6930885 |
| MOXD2    | -1.5407896 |
| MPHOSPH9 | -2.9240282 |
| MPL      | -2.0681682 |
| MPP3     | -1.8333216 |
| MPP7     | -0.69519   |
| MPPED2   | -2.8067904 |
| MPTX1    | -0.5987356 |
| MR1      | -1.5888228 |
| MRC1     | -1.2603872 |
| MRC2     | -3.6534305 |
| MRGPRA1  | -2.540724  |
| MRGPRA2A | -0.4087582 |
| MRGPRA2B | -0.506103  |
| MRGPRA3  | -2.0075793 |
| MRGPRA4  | -2.7887144 |
| MRGPRA5  | -4.0974827 |
| MRGPRB4  | -3.3962424 |
| MRGPRG   | -1.3347044 |
| MRGPRH   | -2.7083507 |
| MRO      | -1.9185557 |
| MROH2A   | -2.5929422 |
| MROH5    | -0.4150369 |
| MROH7    | -4.299556  |
| MROH9    | -1.1783206 |
| MRPL28   | -5.5635166 |
| MRRF     | -0.7681749 |
| MRVI1    | -2.1853764 |
| MS4A1    | -2.819199  |
| MS4A10   | -3.482262  |
| MS4A14   | -2.8616421 |
| MS4A15   | -1.8107014 |
| MS4A4B   | -0.7411611 |
| MS4A7    | -0.7522767 |
| MSANTD1  | -1.5879526 |
| MSGN1    | -3.4674058 |
| MSH4     | -1.733861  |
| MSH5     | -3.809991  |
| MSL3L2   | -1.8991559 |
| MSLN     | -3.384521  |
| MSLNL    | -3.7391398 |
| MSMB     | -3.2130797 |
| MSMP     | -4.211418  |
| MSRB3    | -0.5158162 |

|          |            |
|----------|------------|
| MSX1     | -3.0258806 |
| MSX2     | -1.1515808 |
| MSX3     | -3.1936903 |
| MTAP7D3  | -2.5068054 |
| MTCH1    | -0.9165876 |
| MTCL1    | -6.692831  |
| MTERF1B  | -1.341295  |
| MTHFD2L  | -0.3383131 |
| MTHFSD   | -1.2299137 |
| MTL5     | -0.8661449 |
| MTNR1B   | -4.2654557 |
| MTRR     | -1.5137641 |
| MTSS1L   | -4.648342  |
| MTURN    | -0.9345624 |
| MUC13    | -1.4845967 |
| MUC20    | -3.2445147 |
| MUC4     | -4.7733197 |
| MUC5AC   | -2.243279  |
| MUC5B    | -6.0325003 |
| MUC6     | -3.5174847 |
| MUCL1    | -4.8266845 |
| MUM1     | -0.4183905 |
| MUP6     | -3.1283147 |
| MUP-PS12 | -2.2759018 |
| MURC     | -3.7403488 |
| MUSTN1   | -1.6591017 |
| MUTYH    | -0.839525  |
| MVB12B   | -2.3027112 |
| MXD3     | -3.121687  |
| MXRA7    | -3.8950186 |
| MXRA8    | -3.9997845 |
| MYB      | -3.0650964 |
| MYBPC1   | -2.43782   |
| MYBPC3   | -1.0219357 |
| MYBPH    | -5.4292183 |
| MYBPHL   | -3.9412804 |
| MYCBP    | -0.600697  |
| MYCBPAP  | -2.171922  |
| MYCN     | -2.108087  |
| MYCT1    | -3.335696  |
| MYH1     | -4.094739  |
| MYH10    | -1.4375105 |
| MYH11    | -4.6817527 |
| MYH13    | -4.29805   |
| MYH14    | -3.3319528 |

|        |            |
|--------|------------|
| MYH15  | -5.200198  |
| MYH4   | -3.6236537 |
| MYH6   | -9.297291  |
| MYH7   | -6.0963545 |
| MYH7B  | -5.0608935 |
| MYH8   | -3.7168841 |
| MYL10  | -4.2872987 |
| MYL12B | -0.5125902 |
| MYL2   | -4.6289062 |
| MYL3   | -4.9723845 |
| MYL4   | -5.093347  |
| MYL6B  | -2.39832   |
| MYL7   | -6.598146  |
| MYL9   | -4.05803   |
| MYLIP  | -0.7277606 |
| MYLK   | -2.506159  |
| MYLPF  | -2.178628  |
| MYO15  | -2.877402  |
| MYO18B | -2.1700504 |
| MYO1A  | -3.2862124 |
| MYO1C  | -1.9152987 |
| MYO1F  | -0.8742998 |
| MYO1G  | -0.3588188 |
| MYO1H  | -0.9389837 |
| MYO3A  | -3.9298482 |
| MYO3B  | -1.7912426 |
| MYO5A  | -1.461993  |
| MYO5C  | -6.689849  |
| MYO9A  | -1.3768692 |
| MYOC   | -3.961097  |
| MYOCD  | -2.1697478 |
| MYOF   | -1.6865623 |
| MYOM2  | -5.701781  |
| MYOM3  | -0.8814251 |
| MYOT   | -8.670267  |
| MYOZ1  | -3.077298  |
| MYOZ2  | -4.5840693 |
| MYOZ3  | -2.6907132 |
| MYPN   | -4.642521  |
| MYRIP  | -3.6666713 |
| MYT1L  | -3.443038  |
| MYZAP  | -5.1443553 |
| MZB1   | -2.7847586 |
| N28178 | -2.792044  |
| N4BP1  | -1.5825112 |

|          |            |
|----------|------------|
| NAA11    | -2.7958164 |
| NAAA     | -1.2740762 |
| NAALADL1 | -2.5695355 |
| NAALADL2 | -2.0286136 |
| NACAD    | -3.970344  |
| NACC1    | -0.5049679 |
| NAIF1    | -3.1502197 |
| NAIP7    | -3.5891516 |
| NALCN    | -2.8572197 |
| NANOS2   | -2.5442133 |
| NAP1L5   | -2.2573736 |
| NAPSA    | -2.5371816 |
| NAT14    | -3.928741  |
| NAT3     | -2.5571203 |
| NAV1     | -1.4772234 |
| NAV2     | -0.4815412 |
| NAV3     | -1.8201208 |
| NBEA     | -2.6806188 |
| NBL1     | -3.223098  |
| NCALD    | -2.283533  |
| NCAN     | -2.6583767 |
| NCAPH    | -0.7364814 |
| NCCRP1   | -2.3034031 |
| NCK2     | -2.0708373 |
| NCKAP5   | -5.4486923 |
| NCKAP5L  | -3.7579384 |
| NCMAP    | -4.3503695 |
| NCR1     | -2.6237526 |
| NCS1     | -1.9426856 |
| NCTC1    | -1.6080468 |
| NDC80    | -5.724682  |
| NDFIP2   | -2.7242856 |
| NDN      | -2.4839385 |
| NDNF     | -5.3593245 |
| NDP      | -1.3675983 |
| NDRG4    | -3.8942978 |
| NDST3    | -4.0671496 |
| NDST4    | -2.074059  |
| NDUFA4L2 | -0.8365839 |
| NDUFAF5  | -1.0638514 |
| NEB      | -2.3287804 |
| NEBL     | -3.3845549 |
| NECAB2   | -2.1298409 |
| NECAB3   | -2.1510787 |
| NEDD9    | -1.4659376 |

|         |            |
|---------|------------|
| NEFH    | -3.926942  |
| NEFM    | -3.3958569 |
| NEIL3   | -2.3465712 |
| NEK10   | -2.6650891 |
| NEK11   | -2.2825692 |
| NEK2    | -1.4619923 |
| NEK5    | -2.0266628 |
| NENF    | -0.3827379 |
| NEPN    | -3.6768844 |
| NES     | -2.01436   |
| NESPAS  | -3.7274873 |
| NETO1   | -2.5440304 |
| NETO2   | -2.5122182 |
| NEU2    | -0.6809957 |
| NEURL1A | -1.1633332 |
| NEUROD4 | -2.4690099 |
| NEUROG1 | -1.5410724 |
| NEXN    | -3.124419  |
| NF2     | -0.5078116 |
| NFAM1   | -0.3771498 |
| NFATC2  | -2.3367276 |
| NFATC4  | -0.9809065 |
| NFE2    | -1.6062465 |
| NFE2L3  | -1.9657421 |
| NFIA    | -0.4024367 |
| NGB     | -3.1637228 |
| NGFRAP1 | -1.2314355 |
| NHLRC4  | -4.150419  |
| NID2    | -1.367902  |
| NIM1K   | -2.8562348 |
| NIN     | -0.554323  |
| NINL    | -0.9563582 |
| NIPA1   | -1.9165409 |
| NIPAL2  | -3.8370986 |
| NIPAL3  | -2.1615412 |
| NKAIN2  | -2.3797364 |
| NKAIN4  | -6.406494  |
| NKD1    | -3.6113122 |
| NKG7    | -0.6803005 |
| NKPD1   | -5.251209  |
| NKX1-1  | -1.8272579 |
| NKX1-2  | -3.6271532 |
| NKX2-1  | -6.738655  |
| NKX2-2  | -1.0991719 |
| NKX2-3  | -4.761655  |

|          |            |
|----------|------------|
| NKX2-4   | -3.4555757 |
| NKX2-5   | -2.9729655 |
| NKX2-9   | -2.729356  |
| NKX3-1   | -3.1446233 |
| NKX3-2   | -5.656945  |
| NKX6-3   | -4.45167   |
| NLE1     | -2.3584087 |
| NLGN1    | -2.3180912 |
| NLGN2    | -0.3322985 |
| NLRP10   | -4.4238687 |
| NLRP12   | -0.862531  |
| NLRP14   | -1.4881113 |
| NLRP1B   | -1.9959666 |
| NLRP2    | -2.4558523 |
| NLRP4A   | -3.0524228 |
| NLRP4B   | -4.3542957 |
| NLRP4C   | -5.7245646 |
| NLRP4D   | -2.7350793 |
| NLRP4E   | -2.97244   |
| NLRP4F   | -5.1914635 |
| NLRP4G   | -3.1828527 |
| NLRP5    | -1.9758983 |
| NLRP5-PS | -2.254187  |
| NLRP9A   | -2.7071729 |
| NLRP9C   | -1.9673421 |
| NMBR     | -2.8664732 |
| NME5     | -4.308916  |
| NME8     | -3.123357  |
| NME9     | -4.5598154 |
| NMRK2    | -2.8029594 |
| NMU      | -2.3585753 |
| NMUR1    | -4.5625143 |
| NMUR2    | -4.8678904 |
| NNAT     | -3.2009778 |
| NOL10    | -0.5946307 |
| NOL3     | -3.7824857 |
| NOP9     | -1.3203282 |
| NOS1     | -2.778553  |
| NOTCH1   | -1.6654165 |
| NOTCH3   | -3.7695875 |
| NOTCH4   | -1.2629917 |
| NOTO     | -3.4813018 |
| NOTUMOS  | -2.6452096 |
| NOVA1    | -0.9479032 |
| NOVA2    | -0.2919521 |



|          |            |
|----------|------------|
| NOX1     | -2.3309445 |
| NOX4     | -6.1619797 |
| NPAS1    | -3.0700498 |
| NPAS2    | -2.7001622 |
| NPAS4    | -13.699804 |
| NPAT     | -1.6654632 |
| NPB      | -1.100929  |
| NPBWR1   | -2.9771957 |
| NPC2     | -1.0919478 |
| NPCD     | -1.1309593 |
| NPFFR1   | -2.0735202 |
| NPFFR2   | -2.523397  |
| NPHP4    | -1.5521619 |
| NPHS1    | -2.9871116 |
| NPHS2    | -3.9645877 |
| NPM2     | -0.788867  |
| NPM3     | -1.7709931 |
| NPM3-PS1 | -0.8464232 |
| NPNT     | -6.2966294 |
| NPPA     | -2.8295496 |
| NPPB     | -2.476845  |
| NPR2     | -0.6724823 |
| NPR3     | -4.2156954 |
| NPSR1    | -2.4829426 |
| NPVF     | -3.3027997 |
| NPW      | -7.1438684 |
| NPY1R    | -3.5082364 |
| NPY2R    | -2.9882371 |
| NPY4R    | -3.396518  |
| NROB2    | -3.1594348 |
| NR2F1    | -2.3201497 |
| NR2F2    | -1.2224548 |
| NR3C2    | -4.786118  |
| NR4A2    | -4.3390083 |
| NR5A1    | -1.0642865 |
| NRADD    | -2.7385979 |
| NRAP     | -0.8898282 |
| NRARP    | -3.0086224 |
| NRCAM    | -5.355447  |
| NRD1     | -1.242692  |
| NREP     | -5.662155  |
| NRG2     | -2.7541578 |
| NRGN     | -3.0961838 |
| NRIP2    | -2.9172595 |
| NRL      | -4.990777  |

|          |            |
|----------|------------|
| NRM      | -1.1938822 |
| NRP      | -4.81738   |
| NRSN1    | -3.0479865 |
| NRTN     | -0.4838917 |
| NRXN2    | -1.7576151 |
| NSG1     | -3.8844268 |
| NSG2     | -4.9625797 |
| NSL1     | -0.493685  |
| NSUN7    | -2.313057  |
| NT5C1A   | -2.4821503 |
| NT5DC2   | -2.0539355 |
| NTF5     | -3.4768534 |
| NTHL1    | -3.7684486 |
| NTM      | -2.6704879 |
| NTN1     | -2.0204666 |
| NTN4     | -3.5582252 |
| NTN5     | -3.0955994 |
| NTNG1    | -4.9911966 |
| NTNG2    | -0.6750443 |
| NTRK1    | -5.92498   |
| NTRK2    | -2.7078545 |
| NTRK3    | -1.9271    |
| NTSR1    | -3.915521  |
| NUAK1    | -3.2303853 |
| NUDT10   | -2.821948  |
| NUDT12OS | -2.9524329 |
| NUDT15   | -2.2808897 |
| NUDT17   | -3.8525925 |
| NUDT18   | -0.8962262 |
| NUF2     | -1.4167833 |
| NUGGC    | -1.4863806 |
| NUMB     | -0.5451171 |
| NUMBL    | -1.1929042 |
| NUPR1L   | -2.7431998 |
| NUSAP1   | -1.5837364 |
| NWD1     | -1.1555376 |
| NWD2     | -2.0293903 |
| NXF2     | -1.8640382 |
| NXNL1    | -1.2113972 |
| NXNL2    | -0.9892864 |
| NXPE2    | -1.1296725 |
| NXPE3    | -1.6098213 |
| NXPE4    | -4.181183  |
| NXPH1    | -2.8308764 |
| NXPH3    | -3.9854145 |

|          |            |
|----------|------------|
| NYAP1    | -1.3828965 |
| NYAP2    | -3.6758852 |
| NYNRIN   | -4.7641315 |
| OAS1C    | -1.7406096 |
| OAS1D    | -2.8526688 |
| OAS1E    | -1.0896764 |
| OAS1G    | -1.0159893 |
| OAS1H    | -3.4164581 |
| OAZ2     | -0.5560319 |
| OAZ3     | -6.454608  |
| OBOX3    | -2.7249286 |
| OBOX5    | -4.0356026 |
| OBP1A    | -1.4981816 |
| OBP2B    | -3.3323922 |
| OBSCN    | -3.1826758 |
| OBSL1    | -3.1886039 |
| OCIAD2   | -2.0997725 |
| OCM      | -3.5321362 |
| ODF1     | -3.4021568 |
| ODF3     | -2.8772564 |
| ODF3B    | -1.1620977 |
| ODF3L2   | -3.1671414 |
| ODF4     | -3.6960573 |
| OFCC1    | -3.3972678 |
| OGDHL    | -3.3075    |
| OGN      | -9.238321  |
| OIP5     | -3.7532477 |
| OIT1     | -3.6060696 |
| OLAH     | -6.073149  |
| OLFM1    | -1.8974266 |
| OLFM3    | -2.9005601 |
| OLFML1   | -3.12277   |
| OLFML2A  | -0.7898011 |
| OLFML2B  | -1.2703397 |
| OLFML3   | -3.1937933 |
| OLFR1    | -2.7062008 |
| OLFR10   | -2.8481805 |
| OLFR100  | -2.2247794 |
| OLFR1000 | -3.0175111 |
| OLFR1006 | -4.0657883 |
| OLFR1009 | -4.2142763 |
| OLFR1010 | -2.9056573 |
| OLFR1012 | -4.0762563 |
| OLFR1013 | -2.8898637 |
| OLFR1014 | -2.5638092 |

|            |            |
|------------|------------|
| OLFR1015   | -2.230826  |
| OLFR1018   | -2.577928  |
| OLFR1019   | -3.8797932 |
| OLFR1024   | -2.627102  |
| OLFR1028   | -2.7575688 |
| OLFR1030   | -4.485518  |
| OLFR1031   | -2.4118347 |
| OLFR1032   | -3.90897   |
| OLFR1033   | -5.6702914 |
| OLFR1039   | -3.605436  |
| OLFR1040   | -4.927762  |
| OLFR1042   | -3.9745135 |
| OLFR1043   | -2.4085746 |
| OLFR1045   | -2.5351427 |
| OLFR1046   | -4.3382373 |
| OLFR104-PS | -4.0112133 |
| OLFR1051   | -3.5047815 |
| OLFR1052   | -4.5350513 |
| OLFR1054   | -4.781423  |
| OLFR1055   | -5.4592457 |
| OLFR1056   | -3.6884985 |
| OLFR1057   | -3.4625077 |
| OLFR105-PS | -4.3205624 |
| OLFR1061   | -3.413019  |
| OLFR1062   | -2.954939  |
| OLFR1065   | -3.6978807 |
| OLFR107    | -4.266387  |
| OLFR1082   | -2.192444  |
| OLFR1085   | -2.6001873 |
| OLFR1086   | -2.8429205 |
| OLFR1089   | -4.4405785 |
| OLFR1090   | -3.2070718 |
| OLFR1097   | -1.8454347 |
| OLFR11     | -2.454783  |
| OLFR110    | -5.566543  |
| OLFR1100   | -5.471755  |
| OLFR1101   | -3.443006  |
| OLFR1102   | -2.8583837 |
| OLFR1107   | -5.371327  |
| OLFR111    | -4.136386  |
| OLFR1110   | -6.9394817 |
| OLFR1111   | -5.101495  |
| OLFR1112   | -3.6092083 |
| OLFR1115   | -1.8796058 |
| OLFR1120   | -1.4064655 |

|          |            |
|----------|------------|
| OLFR1121 | -1.7333665 |
| OLFR1122 | -1.0232744 |
| OLFR1123 | -3.8699    |
| OLFR1124 | -4.908984  |
| OLFR1131 | -1.9669166 |
| OLFR1135 | -3.9078813 |
| OLFR1136 | -5.6039543 |
| OLFR1137 | -4.330134  |
| OLFR1138 | -3.3358498 |
| OLFR114  | -3.7898948 |
| OLFR1140 | -4.434682  |
| OLFR1141 | -3.1677623 |
| OLFR1145 | -4.850323  |
| OLFR1152 | -4.666602  |
| OLFR1153 | -3.094347  |
| OLFR1155 | -3.286317  |
| OLFR1156 | -3.5294971 |
| OLFR1157 | -4.9734764 |
| OLFR1158 | -3.673253  |
| OLFR1162 | -4.1832895 |
| OLFR1164 | -3.2852342 |
| OLFR1168 | -1.1557355 |
| OLFR1170 | -4.3090267 |
| OLFR1173 | -4.8307524 |
| OLFR1178 | -3.306279  |
| OLFR1179 | -5.8586907 |
| OLFR118  | -3.0744956 |
| OLFR1180 | -0.7322609 |
| OLFR1181 | -3.7600336 |
| OLFR1184 | -2.8820486 |
| OLFR1189 | -4.2941527 |
| OLFR1193 | -5.6670904 |
| OLFR12   | -2.1827672 |
| OLFR1200 | -4.0880337 |
| OLFR1202 | -4.9232025 |
| OLFR1206 | -4.537388  |
| OLFR1214 | -4.017928  |
| OLFR1215 | -3.4362588 |
| OLFR122  | -4.153159  |
| OLFR1220 | -2.3489327 |
| OLFR1226 | -5.0256033 |
| OLFR1231 | -3.7246385 |
| OLFR1238 | -3.9334455 |
| OLFR124  | -3.1439967 |
| OLFR1241 | -2.3693564 |

|             |            |
|-------------|------------|
| OLFR1243    | -2.4946365 |
| OLFR1245    | -4.1239247 |
| OLFR1248    | -3.2521985 |
| OLFR1249    | -1.0159361 |
| OLFR1250    | -1.3734741 |
| OLFR1252    | -0.9830203 |
| OLFR1254    | -6.5841103 |
| OLFR1256    | -2.3671389 |
| OLFR1257    | -3.4478579 |
| OLFR1258    | -2.8941479 |
| OLFR1259    | -3.7952425 |
| OLFR126     | -3.3846385 |
| OLFR1261    | -4.8312244 |
| OLFR1262    | -4.9805527 |
| OLFR1263    | -3.1436388 |
| OLFR1264    | -2.6305594 |
| OLFR1265    | -2.4112837 |
| OLFR1271    | -3.38732   |
| OLFR1272    | -3.8495288 |
| OLFR1275    | -4.9573984 |
| OLFR1276    | -1.9138415 |
| OLFR1277    | -2.9350173 |
| OLFR1278    | -2.9983478 |
| OLFR1279    | -2.6877    |
| OLFR1280    | -2.3616798 |
| OLFR1286    | -3.6784382 |
| OLFR1287    | -2.8372145 |
| OLFR1288    | -4.11409   |
| OLFR1289    | -4.978426  |
| OLFR129     | -6.14574   |
| OLFR1297    | -3.6808844 |
| OLFR13      | -2.656615  |
| OLFR130     | -2.7390764 |
| OLFR1300-PS | -3.470248  |
| OLFR1302    | -5.1218085 |
| OLFR1303    | -3.5324128 |
| OLFR1308    | -2.6779058 |
| OLFR131     | -3.3963952 |
| OLFR1310    | -1.7276037 |
| OLFR1311    | -4.609725  |
| OLFR1312    | -1.045558  |
| OLFR1313    | -4.069194  |
| OLFR1314    | -4.7790394 |
| OLFR1316    | -1.8254151 |
| OLFR132     | -5.8617544 |

|          |            |
|----------|------------|
| OLFR1320 | -3.1565194 |
| OLFR1321 | -3.2153938 |
| OLFR1322 | -4.2053165 |
| OLFR1323 | -3.7047946 |
| OLFR1324 | -2.3370554 |
| OLFR1328 | -4.1198    |
| OLFR133  | -5.049382  |
| OLFR1330 | -4.660391  |
| OLFR1333 | -8.300614  |
| OLFR1336 | -4.794936  |
| OLFR1337 | -4.1866064 |
| OLFR1338 | -3.031805  |
| OLFR1339 | -3.6462533 |
| OLFR1340 | -3.9183066 |
| OLFR1341 | -3.7176728 |
| OLFR1342 | -4.8703275 |
| OLFR1344 | -4.492363  |
| OLFR1347 | -1.6871514 |
| OLFR1348 | -4.939326  |
| OLFR135  | -3.709955  |
| OLFR1350 | -2.4896455 |
| OLFR1351 | -4.96976   |
| OLFR1352 | -3.3396451 |
| OLFR1358 | -3.2930107 |
| OLFR1361 | -2.7782178 |
| OLFR1362 | -5.0731983 |
| OLFR1364 | -3.9607844 |
| OLFR137  | -3.780581  |
| OLFR1370 | -2.333606  |
| OLFR1377 | -2.9988205 |
| OLFR1378 | -4.2318654 |
| OLFR1382 | -2.6389897 |
| OLFR1383 | -4.10979   |
| OLFR1385 | -3.7739267 |
| OLFR1393 | -2.053807  |
| OLFR1396 | -2.023353  |
| OLFR1410 | -0.6181855 |
| OLFR1411 | -3.770899  |
| OLFR1414 | -3.808276  |
| OLFR1415 | -5.2268963 |
| OLFR1417 | -1.942409  |
| OLFR1418 | -3.7057843 |
| OLFR1419 | -2.3430548 |
| OLFR142  | -2.513451  |
| OLFR1420 | -3.1739516 |

|             |            |
|-------------|------------|
| OLFR1423    | -4.4387035 |
| OLFR1425    | -3.9877439 |
| OLFR1427    | -2.3943589 |
| OLFR1433    | -4.661951  |
| OLFR1436    | -1.8352404 |
| OLFR1441    | -4.804657  |
| OLFR1445    | -4.1975965 |
| OLFR1446    | -2.0579138 |
| OLFR1448    | -4.701627  |
| OLFR145     | -2.8671815 |
| OLFR1450    | -2.0892162 |
| OLFR1451    | -6.7152824 |
| OLFR1454    | -5.903279  |
| OLFR1459    | -3.8558874 |
| OLFR146     | -3.0620031 |
| OLFR1461    | -5.1573606 |
| OLFR1462    | -2.7785342 |
| OLFR1465    | -3.9544032 |
| OLFR147     | -4.7931004 |
| OLFR1474    | -2.877111  |
| OLFR1490    | -6.1882315 |
| OLFR1496    | -3.1823049 |
| OLFR1497    | -3.3825727 |
| OLFR150     | -3.945861  |
| OLFR1500    | -6.6003313 |
| OLFR1501    | -3.6467216 |
| OLFR1502    | -2.6106033 |
| OLFR1505    | -0.6677227 |
| OLFR1507    | -2.2029853 |
| OLFR1508    | -4.7554493 |
| OLFR1509    | -1.9350183 |
| OLFR1511    | -3.1441123 |
| OLFR1513    | -5.1486588 |
| OLFR152     | -4.592226  |
| OLFR1532-PS | -3.8392982 |
| OLFR1537    | -1.9938388 |
| OLFR155     | -2.684548  |
| OLFR156     | -3.5702052 |
| OLFR157     | -3.7801912 |
| OLFR160     | -5.193261  |
| OLFR161     | -5.561241  |
| OLFR17      | -4.479355  |
| OLFR170     | -1.8016198 |
| OLFR176     | -2.4781585 |
| OLFR178     | -3.6648939 |



|             |            |
|-------------|------------|
| OLFR18      | -4.016407  |
| OLFR181     | -2.3465176 |
| OLFR183     | -3.299775  |
| OLFR186     | -4.2517657 |
| OLFR187     | -2.9784362 |
| OLFR19      | -3.7000904 |
| OLFR190     | -3.9268951 |
| OLFR194     | -2.1370533 |
| OLFR195     | -2.9535415 |
| OLFR196     | -4.213356  |
| OLFR198     | -1.24091   |
| OLFR20      | -3.8531046 |
| OLFR204     | -4.6703687 |
| OLFR207     | -4.010209  |
| OLFR208     | -5.2928505 |
| OLFR209     | -2.4728165 |
| OLFR212     | -2.6564775 |
| OLFR213     | -3.6005206 |
| OLFR218     | -3.2321153 |
| OLFR220     | -0.6506424 |
| OLFR222     | -3.7259557 |
| OLFR223     | -3.0147038 |
| OLFR23      | -3.700069  |
| OLFR231     | -2.8691993 |
| OLFR237-PS1 | -3.5987473 |
| OLFR24      | -3.7370524 |
| OLFR247     | -4.267728  |
| OLFR248     | -2.5147157 |
| OLFR250     | -5.4697113 |
| OLFR259     | -0.7404001 |
| OLFR26      | -3.3471403 |
| OLFR270     | -4.198057  |
| OLFR272     | -5.3615127 |
| OLFR275     | -4.9012027 |
| OLFR279     | -4.2228723 |
| OLFR281     | -6.0365276 |
| OLFR282     | -4.9101324 |
| OLFR283     | -6.0759716 |
| OLFR288     | -2.9061382 |
| OLFR295     | -2.9895551 |
| OLFR297     | -4.6607823 |
| OLFR3       | -1.9097857 |
| OLFR30      | -1.7494183 |
| OLFR301     | -2.5631363 |
| OLFR303     | -2.919994  |

|            |            |
|------------|------------|
| OLFR304    | -2.302512  |
| OLFR305    | -2.683084  |
| OLFR307    | -5.1415606 |
| OLFR308    | -4.8159285 |
| OLFR309    | -3.3292155 |
| OLFR310    | -4.6285825 |
| OLFR312    | -1.1853719 |
| OLFR314    | -3.6380706 |
| OLFR317    | -2.4797528 |
| OLFR32     | -5.3960752 |
| OLFR323    | -2.2906916 |
| OLFR328    | -3.753148  |
| OLFR330    | -2.1017222 |
| OLFR331    | -1.7900553 |
| OLFR332    | -3.6308808 |
| OLFR338    | -3.3810844 |
| OLFR339    | -3.2205484 |
| OLFR340    | -1.5492251 |
| OLFR344    | -3.7496877 |
| OLFR345    | -6.466036  |
| OLFR346    | -1.8350258 |
| OLFR348    | -4.4080844 |
| OLFR351    | -4.368497  |
| OLFR352    | -4.236847  |
| OLFR354    | -4.4931374 |
| OLFR356    | -5.09879   |
| OLFR358    | -2.7511437 |
| OLFR362    | -2.2008178 |
| OLFR365    | -3.5208008 |
| OLFR367-PS | -2.5973606 |
| OLFR368    | -4.797859  |
| OLFR374    | -2.9710264 |
| OLFR38     | -5.0341187 |
| OLFR380    | -4.158773  |
| OLFR382    | -3.9370952 |
| OLFR39     | -5.5795584 |
| OLFR390    | -4.216611  |
| OLFR391-PS | -3.3380816 |
| OLFR392    | -0.6810918 |
| OLFR393    | -2.2212062 |
| OLFR398    | -4.162875  |
| OLFR401    | -2.298485  |
| OLFR402    | -4.650916  |
| OLFR406    | -4.262723  |
| OLFR417    | -2.46902   |

|             |            |
|-------------|------------|
| OLFR418-PS1 | -3.4012551 |
| OLFR420     | -3.4511347 |
| OLFR421-PS1 | -2.731514  |
| OLFR426     | -2.230571  |
| OLFR427     | -4.325964  |
| OLFR429     | -3.4173422 |
| OLFR430     | -4.2813783 |
| OLFR432     | -5.028296  |
| OLFR433     | -7.4909067 |
| OLFR434     | -2.3645728 |
| OLFR441     | -4.1007185 |
| OLFR444     | -2.6217668 |
| OLFR446     | -5.6422844 |
| OLFR447     | -3.9778814 |
| OLFR453     | -2.1342115 |
| OLFR455     | -2.9379585 |
| OLFR456     | -2.5425508 |
| OLFR458     | -5.0791826 |
| OLFR46      | -3.5659223 |
| OLFR461     | -4.3138947 |
| OLFR462     | -2.3732793 |
| OLFR464     | -3.0598805 |
| OLFR466     | -4.2715735 |
| OLFR467     | -3.1644244 |
| OLFR469     | -1.3822649 |
| OLFR470     | -2.3387575 |
| OLFR477     | -1.6135082 |
| OLFR478     | -3.1780484 |
| OLFR479     | -3.5483704 |
| OLFR48      | -2.170681  |
| OLFR480     | -4.357289  |
| OLFR481     | -5.497017  |
| OLFR487     | -4.4627547 |
| OLFR49      | -5.383282  |
| OLFR490     | -5.1089706 |
| OLFR491     | -3.561552  |
| OLFR495     | -4.209068  |
| OLFR5       | -3.1144605 |
| OLFR50      | -3.9408958 |
| OLFR502     | -3.1619484 |
| OLFR508     | -3.4327538 |
| OLFR512     | -3.8995981 |
| OLFR513     | -1.3800495 |
| OLFR514     | -5.239654  |
| OLFR516     | -2.314063  |

|         |            |
|---------|------------|
| OLFR517 | -2.76505   |
| OLFR518 | -4.6427975 |
| OLFR52  | -2.6636496 |
| OLFR520 | -3.7265577 |
| OLFR524 | -0.813103  |
| OLFR538 | -2.5333996 |
| OLFR543 | -4.0424967 |
| OLFR544 | -1.1041539 |
| OLFR545 | -4.3374233 |
| OLFR547 | -4.819867  |
| OLFR550 | -2.8339283 |
| OLFR551 | -4.9264374 |
| OLFR552 | -2.5443227 |
| OLFR554 | -6.2152276 |
| OLFR555 | -4.121518  |
| OLFR557 | -2.2994273 |
| OLFR558 | -3.3214931 |
| OLFR559 | -3.5892854 |
| OLFR560 | -2.4116907 |
| OLFR569 | -3.7238433 |
| OLFR570 | -3.3532176 |
| OLFR571 | -3.9670517 |
| OLFR574 | -4.4682107 |
| OLFR576 | -1.5084221 |
| OLFR577 | -2.8766227 |
| OLFR578 | -4.957819  |
| OLFR58  | -2.7564306 |
| OLFR582 | -6.0251584 |
| OLFR584 | -3.677151  |
| OLFR59  | -5.8306384 |
| OLFR591 | -2.772963  |
| OLFR593 | -5.005521  |
| OLFR6   | -3.9594345 |
| OLFR60  | -2.672064  |
| OLFR601 | -2.9330757 |
| OLFR607 | -3.419621  |
| OLFR61  | -3.5305107 |
| OLFR616 | -1.5940204 |
| OLFR617 | -4.189784  |
| OLFR619 | -4.829225  |
| OLFR62  | -3.5395749 |
| OLFR620 | -3.3781857 |
| OLFR623 | -3.070007  |
| OLFR624 | -2.344295  |
| OLFR629 | -2.970664  |

|         |            |
|---------|------------|
| OLFR630 | -3.041289  |
| OLFR631 | -2.4450219 |
| OLFR632 | -7.3736753 |
| OLFR638 | -1.9156268 |
| OLFR639 | -2.5743272 |
| OLFR640 | -3.247326  |
| OLFR642 | -4.67867   |
| OLFR644 | -2.665273  |
| OLFR645 | -5.867797  |
| OLFR646 | -3.648549  |
| OLFR648 | -3.9543715 |
| OLFR649 | -1.5012941 |
| OLFR65  | -2.9699888 |
| OLFR651 | -3.640846  |
| OLFR652 | -4.9411087 |
| OLFR655 | -4.674331  |
| OLFR658 | -3.066567  |
| OLFR66  | -5.3703723 |
| OLFR661 | -3.1607304 |
| OLFR665 | -2.6244605 |
| OLFR666 | -4.1573915 |
| OLFR668 | -3.6644094 |
| OLFR67  | -2.8392286 |
| OLFR670 | -7.0631704 |
| OLFR671 | -3.7447853 |
| OLFR676 | -4.106727  |
| OLFR678 | -5.105495  |
| OLFR681 | -2.1884546 |
| OLFR683 | -2.3390255 |
| OLFR686 | -2.6506033 |
| OLFR688 | -2.898287  |
| OLFR691 | -4.9610243 |
| OLFR695 | -3.364087  |
| OLFR698 | -5.153015  |
| OLFR699 | -4.845557  |
| OLFR70  | -2.9874601 |
| OLFR700 | -2.7291121 |
| OLFR701 | -4.8364005 |
| OLFR702 | -3.4691658 |
| OLFR703 | -1.6420498 |
| OLFR707 | -4.154587  |
| OLFR71  | -5.0783405 |
| OLFR710 | -3.135114  |
| OLFR713 | -2.921597  |
| OLFR714 | -4.913541  |

|            |            |
|------------|------------|
| OLFR715    | -3.6889746 |
| OLFR720    | -3.9974318 |
| OLFR722    | -4.7419043 |
| OLFR723    | -5.264268  |
| OLFR724    | -1.6898298 |
| OLFR728    | -1.3079019 |
| OLFR729    | -4.154849  |
| OLFR738    | -2.8673058 |
| OLFR74     | -1.1182277 |
| OLFR741    | -2.4213688 |
| OLFR743    | -4.9322367 |
| OLFR749    | -6.0989285 |
| OLFR750    | -3.07016   |
| OLFR75-PS1 | -1.7611468 |
| OLFR76     | -5.1822534 |
| OLFR761    | -3.584839  |
| OLFR763    | -2.4890528 |
| OLFR764    | -2.6707606 |
| OLFR767    | -4.174411  |
| OLFR769    | -2.4449687 |
| OLFR770    | -2.100423  |
| OLFR776    | -3.1838548 |
| OLFR780    | -3.0318794 |
| OLFR784    | -2.3426454 |
| OLFR786    | -2.6635141 |
| OLFR787    | -0.9065876 |
| OLFR790    | -3.2992766 |
| OLFR798    | -3.394766  |
| OLFR802    | -2.0390058 |
| OLFR803    | -2.6772828 |
| OLFR804    | -2.4840598 |
| OLFR806    | -4.4189262 |
| OLFR815    | -3.4655335 |
| OLFR816    | -3.9717784 |
| OLFR819    | -2.7444625 |
| OLFR820    | -3.086059  |
| OLFR821    | -2.1737173 |
| OLFR823    | -3.4245362 |
| OLFR824    | -3.1751494 |
| OLFR827    | -2.8049552 |
| OLFR828    | -6.067478  |
| OLFR829    | -3.986482  |
| OLFR830    | -6.5772214 |
| OLFR836    | -4.4544516 |
| OLFR837    | -4.5501366 |

|             |            |
|-------------|------------|
| OLFR843     | -3.5277102 |
| OLFR845     | -2.967935  |
| OLFR847     | -3.1338768 |
| OLFR849     | -4.607146  |
| OLFR850     | -5.1185727 |
| OLFR854     | -4.784132  |
| OLFR855     | -2.6339712 |
| OLFR866     | -3.4215755 |
| OLFR867     | -2.8179178 |
| OLFR870     | -3.3428397 |
| OLFR871     | -3.3357425 |
| OLFR873     | -3.087327  |
| OLFR874     | -3.1195414 |
| OLFR876     | -3.3602588 |
| OLFR877     | -3.614657  |
| OLFR887     | -3.1654572 |
| OLFR891     | -3.7170396 |
| OLFR895     | -2.7108984 |
| OLFR899     | -3.4511821 |
| OLFR9       | -3.4110348 |
| OLFR90      | -2.8570893 |
| OLFR901     | -2.4065533 |
| OLFR904     | -4.0154467 |
| OLFR905     | -3.1884916 |
| OLFR906     | -4.848057  |
| OLFR907     | -5.2791986 |
| OLFR910     | -4.5682416 |
| OLFR911-PS1 | -2.6716094 |
| OLFR913     | -4.034998  |
| OLFR914     | -2.6990142 |
| OLFR915     | -2.572473  |
| OLFR916     | -1.6228068 |
| OLFR917     | -3.6391492 |
| OLFR918     | -4.430967  |
| OLFR920     | -2.554912  |
| OLFR921     | -4.140309  |
| OLFR922     | -6.1132007 |
| OLFR923     | -2.5982304 |
| OLFR93      | -2.1893132 |
| OLFR930     | -1.0781856 |
| OLFR934     | -2.667322  |
| OLFR94      | -3.4973805 |
| OLFR945     | -4.7105446 |
| OLFR951     | -3.0024023 |
| OLFR954     | -2.9671896 |

|         |            |
|---------|------------|
| OLFR957 | -5.473089  |
| OLFR96  | -0.8418617 |
| OLFR961 | -4.332322  |
| OLFR963 | -3.991998  |
| OLFR969 | -2.4788404 |
| OLFR971 | -3.7836683 |
| OLFR974 | -3.7090592 |
| OLFR975 | -5.7586823 |
| OLFR976 | -3.0063078 |
| OLFR978 | -2.6499164 |
| OLFR979 | -6.1132097 |
| OLFR980 | -5.671693  |
| OLFR982 | -3.9427981 |
| OLFR985 | -5.4407    |
| OLFR986 | -5.6443105 |
| OLFR994 | -2.590437  |
| OLFR995 | -3.365391  |
| OLFR998 | -4.2873583 |
| OMD     | -3.7460454 |
| OMP     | -1.5483761 |
| OMT2A   | -10.805268 |
| OOEP    | -3.7106385 |
| OOG2    | -3.6119447 |
| OPN1MW  | -2.687832  |
| OPN4    | -3.7061658 |
| OPN5    | -3.7775462 |
| OPRD1   | -4.467351  |
| OPRK1   | -4.942906  |
| OPRL1   | -3.0298831 |
| ORAI1   | -0.3679345 |
| ORLY    | -3.052369  |
| OSBP2   | -1.611732  |
| OSBPL10 | -1.0526402 |
| OSBPL5  | -3.0336206 |
| OSBPL6  | -3.705402  |
| OSCP1   | -1.3678164 |
| OSM     | -0.8628254 |
| OSR1    | -3.278952  |
| OSTN    | -3.8377662 |
| OTOA    | -5.2575603 |
| OTOG    | -3.3902822 |
| OTOL1   | -2.7599933 |
| OTOP1   | -1.4355483 |
| OTOR    | -2.749732  |
| OTOS    | -3.1471207 |



|             |            |
|-------------|------------|
| OTP         | -4.2439246 |
| OTUD6A      | -4.151596  |
| OTUD7B      | -3.9550478 |
| OTX2        | -2.5214612 |
| OVGP1       | -2.3085034 |
| OVOL1       | -3.8230422 |
| OXCT1       | -0.8954976 |
| OXCT2A      | -1.8091037 |
| OXT         | -1.3060596 |
| P2RX1       | -1.4475584 |
| P2RX3       | -0.7739284 |
| P2RX5       | -3.1448033 |
| P2RX6       | -4.211773  |
| P2RX7       | -0.638196  |
| P2RY1       | -0.4625433 |
| P2RY4       | -4.7168283 |
| P4HA3       | -4.5388813 |
| P4HTM       | -3.1130111 |
| PABPC1L2B-F | -2.1582415 |
| PACRG       | -1.7029305 |
| PADI2       | -3.1504836 |
| PADI3       | -3.106358  |
| PADI4       | -2.1710334 |
| PADI6       | -3.0543466 |
| PAG1        | -1.7949853 |
| PAK1        | -0.967993  |
| PAK3        | -2.4058638 |
| PAK6        | -4.999773  |
| PAK7        | -1.4630721 |
| PALB2       | -1.990514  |
| PALD1       | -0.4605811 |
| PALM        | -1.3425252 |
| PALMD       | -0.5357595 |
| PAM         | -1.4302831 |
| PAMR1       | -1.6881287 |
| PANCT2      | -2.4103863 |
| PANX2       | -2.7211916 |
| PAPL        | -2.2783802 |
| PAPOLB      | -3.0940323 |
| PAPPA       | -0.9511573 |
| PAPPA2      | -2.1458297 |
| PAPSS1      | -1.427767  |
| PAQR4       | -2.118998  |
| PAQR6       | -3.9677744 |
| PAQR7       | -0.2949975 |

|           |            |
|-----------|------------|
| PAQR8     | -2.876232  |
| PARD3B    | -4.2502465 |
| PARD3BOS1 | -4.5002584 |
| PARD6B    | -1.697839  |
| PARD6G    | -1.991616  |
| PARM1     | -1.9457712 |
| PARPBP    | -2.8903584 |
| PARVB     | -2.281055  |
| PASK      | -1.6406679 |
| PATZ1     | -2.6253085 |
| PAX2      | -4.008635  |
| PAX3      | -2.3205414 |
| PAX4      | -3.9482226 |
| PAX5      | -3.3037364 |
| PAX8      | -3.976648  |
| PBK       | -2.1795132 |
| PBSN      | -2.8062356 |
| PBX4      | -5.259904  |
| PCBP3     | -0.9270129 |
| PCDH10    | -5.3035307 |
| PCDH11X   | -3.2144263 |
| PCDH12    | -2.6271977 |
| PCDH15    | -3.2491846 |
| PCDH17    | -4.304936  |
| PCDH18    | -4.7437277 |
| PCDH19    | -3.7794528 |
| PCDH7     | -1.1883512 |
| PCDH9     | -2.7936177 |
| PCDHA11   | -4.0066304 |
| PCDHA12   | -3.3350608 |
| PCDHA9    | -2.4554489 |
| PCDHAC1   | -4.2775736 |
| PCDHAC2   | -4.997778  |
| PCDHB1    | -3.0784569 |
| PCDHB10   | -3.4241612 |
| PCDHB12   | -2.1643574 |
| PCDHB14   | -1.6703253 |
| PCDHB15   | -3.0303037 |
| PCDHB16   | -2.126175  |
| PCDHB17   | -1.7016346 |
| PCDHB18   | -1.3389406 |
| PCDHB19   | -3.3876321 |
| PCDHB2    | -2.7320175 |
| PCDHB20   | -2.5624    |
| PCDHB21   | -1.2844906 |

|          |            |
|----------|------------|
| PCDHB3   | -2.734053  |
| PCDHB6   | -2.6402142 |
| PCDHB7   | -2.5262263 |
| PCDHB8   | -2.8125784 |
| PCDHGA10 | -1.7029964 |
| PCDHGA5  | -2.4060702 |
| PCDHGA9  | -1.1666396 |
| PCDHGB1  | -2.0659132 |
| PCDHGC5  | -0.8166337 |
| PCED1B   | -0.5437009 |
| PCK2     | -1.0402033 |
| PCLO     | -3.4959943 |
| PCNX     | -1.7317841 |
| PCNXL2   | -2.7976367 |
| PCOLCE   | -2.8512886 |
| PCOLCE2  | -4.787314  |
| PCP4L1   | -1.4371078 |
| PCSK1    | -0.652602  |
| PCSK1N   | -2.5842001 |
| PCSK2    | -3.1616783 |
| PCYOX1L  | -2.1041136 |
| PCYT1B   | -2.2841012 |
| PDCD1    | -0.7215135 |
| PDCL2    | -3.9193544 |
| PDDC1    | -0.5113773 |
| PDE10A   | -2.6949806 |
| PDE11A   | -3.583755  |
| PDE12    | -1.3580406 |
| PDE1C    | -4.936962  |
| PDE3A    | -2.8466845 |
| PDE4A    | -1.7407415 |
| PDE4D    | -1.9324219 |
| PDE5A    | -3.1372678 |
| PDE6C    | -3.7847931 |
| PDE6G    | -1.5120189 |
| PDE7A    | -1.0108523 |
| PDE8B    | -5.0303345 |
| PDE9A    | -1.3978276 |
| PDGFB    | -4.148877  |
| PDGFD    | -3.977308  |
| PDGFRA   | -2.0253656 |
| PDGFRB   | -1.1037819 |
| PDGFRL   | -2.2126942 |
| PDHA2    | -4.662354  |
| PDIA2    | -4.4712753 |

|          |            |
|----------|------------|
| PDIK1L   | -1.2944429 |
| PDLIM2   | -3.6144483 |
| PDLIM3   | -4.920581  |
| PDPN     | -4.921707  |
| PDXP     | -1.979975  |
| PDZD7    | -3.1871665 |
| PDZD9    | -4.4635916 |
| PDZK1IP1 | -1.777761  |
| PDZRN4   | -4.0866914 |
| PEA15B   | -2.734206  |
| PEAK1    | -0.7670343 |
| PEAR1    | -0.5465105 |
| PECAM1   | -1.3196194 |
| PEG12    | -2.1514742 |
| PEG13    | -1.5101106 |
| PELI3    | -1.5509844 |
| PENK     | -3.652049  |
| PER3     | -2.802474  |
| PERM1    | -2.5615022 |
| PET100   | -1.0466976 |
| PEX5L    | -1.6284089 |
| PF4      | -0.9638083 |
| PFKFB4   | -0.8082418 |
| PFKM     | -1.042073  |
| PFN3     | -3.8892152 |
| PFN4     | -3.9631836 |
| PFPL     | -3.1565773 |
| PGA5     | -3.3282864 |
| PGAM2    | -4.873536  |
| PGAP1    | -0.9854488 |
| PGBD1    | -3.719837  |
| PGBD5    | -2.6168406 |
| PGC      | -1.815301  |
| PGK2     | -3.3420494 |
| PGLYRP1  | -0.8155322 |
| PGLYRP3  | -0.6606338 |
| PGM2L1   | -0.7043088 |
| PGM5     | -3.2637563 |
| PGPEP1L  | -5.3438015 |
| PHACTR1  | -4.226072  |
| PHACTR2  | -2.085115  |
| PHEX     | -2.3741956 |
| PHF20L1  | -0.6681259 |
| PHF21B   | -1.8233554 |
| PHGDH    | -0.5783684 |

|           |            |
|-----------|------------|
| PHGR1     | -4.107816  |
| PHLDA3    | -0.24524   |
| PHLDB1    | -2.3548627 |
| PHLDB2    | -1.2904251 |
| PHOSPHO1  | -0.3655679 |
| PHOX2A    | -2.5486941 |
| PHTF1     | -0.2973816 |
| PHTF1OS   | -3.7096539 |
| PHYHIP    | -5.9018655 |
| PI16      | -4.373614  |
| PIANP     | -1.0805933 |
| PIBF1     | -2.1847234 |
| PIGU      | -0.8587058 |
| PIGW      | -0.801281  |
| PIGZ      | -0.4584851 |
| PIK3C2B   | -3.3524055 |
| PIK3CD    | -0.5333345 |
| PIK3IP1   | -1.8964736 |
| PIK3R3    | -1.6309462 |
| PIKFYVE   | -2.0389905 |
| PILRB1    | -2.3112943 |
| PINC      | -3.323091  |
| PINLYP    | -1.0576086 |
| PIP       | -3.127431  |
| PIP5K1BOS | -3.5529506 |
| PIP5KL1   | -3.4557993 |
| PIRT      | -1.0231881 |
| PISD-PS2  | -2.9656408 |
| PITPNM2   | -0.2634351 |
| PITPNM3   | -4.2670593 |
| PITX3     | -3.3001118 |
| PIWIL2    | -1.9327216 |
| PIWIL4    | -2.5362878 |
| PKD1L1    | -2.4298413 |
| PKD2L1    | -6.3652124 |
| PKDREJ    | -2.954785  |
| PKHD1     | -1.8034241 |
| PKHD1L1   | -2.352359  |
| PKIA      | -3.1261768 |
| PKN3      | -2.945775  |
| PKNOX2    | -5.789839  |
| PKP4      | -0.724653  |
| PLA2G1B   | -4.5824523 |
| PLA2G2A   | -2.5498316 |
| PLA2G2C   | -1.9413233 |

|           |            |
|-----------|------------|
| PLA2G2D   | -2.3142037 |
| PLA2G2E   | -2.249686  |
| PLA2G2F   | -3.7288294 |
| PLA2G4D   | -3.0384834 |
| PLA2G4E   | -2.3000553 |
| PLA2G4F   | -3.2837994 |
| PLA2R1    | -3.8015609 |
| PLAC1     | -3.2405987 |
| PLAC9A    | -2.1306713 |
| PLAG1     | -4.0009766 |
| PLAGL1    | -2.0603845 |
| PLAT      | -2.1248837 |
| PLAU      | -2.818042  |
| PLB1      | -4.407584  |
| PLCB2     | -2.4047027 |
| PLCB3     | -0.4650743 |
| PLCB4     | -0.6917069 |
| PLCD1     | -0.8784816 |
| PLCD3     | -2.078967  |
| PLCG1     | -0.5402224 |
| PLCH1     | -2.348596  |
| PLCH2     | -3.984087  |
| PLD4      | -2.0016227 |
| PLD5      | -0.8555863 |
| PLD6      | -4.274272  |
| PLDI      | -5.2980046 |
| PLEKHA1   | -0.3534133 |
| PLEKHA2   | -1.5322104 |
| PLEKHB1   | -1.9668734 |
| PLEKHD1   | -5.4789486 |
| PLEKHD1OS | -2.7217894 |
| PLEKHF1   | -0.3764553 |
| PLEKHG1   | -3.0136127 |
| PLEKHH3   | -0.8402321 |
| PLEKHN1   | -4.623252  |
| PLEKHO1   | -0.366627  |
| PLEKHO2   | -0.5389903 |
| PLET1     | -2.056988  |
| PLIN1     | -2.07865   |
| PLK1      | -0.5496261 |
| PLK2      | -0.692919  |
| PLK4      | -3.904111  |
| PLLP      | -3.1153736 |
| PLOD2     | -1.6431692 |
| PLP2      | -2.4532292 |

|           |            |
|-----------|------------|
| PLS1      | -1.909631  |
| PLSCR3    | -0.3417494 |
| PLSCR4    | -3.6612742 |
| PLTP      | -0.6875327 |
| PLVAP     | -0.4965417 |
| PLXDC1    | -2.9838603 |
| PLXDC2    | -4.455303  |
| PLXNA3    | -2.6090672 |
| PLXNA4    | -2.8318582 |
| PLXNB3    | -3.1266844 |
| PMEL      | -1.6857674 |
| PMEPA1    | -3.0361109 |
| PMIS2     | -5.6623726 |
| PMM1      | -0.367106  |
| PMP22     | -3.1812134 |
| PNCK      | -5.1432133 |
| PNLIP     | -1.6938322 |
| PNLIPRP1  | -1.8494611 |
| PNLIPRP2  | -1.9755592 |
| PNMA1     | -2.304477  |
| PNMA3     | -2.1351633 |
| PNMAL1    | -3.5399127 |
| PNMAL2    | -2.9655635 |
| PNPLA1    | -1.4756565 |
| PNPLA3    | -2.6296272 |
| POC1A     | -1.9009519 |
| PODN      | -4.604445  |
| PODNL1    | -3.5674784 |
| PODXL     | -4.1510844 |
| PODXL2    | -3.651205  |
| POF1B     | -3.4016738 |
| POLD1     | -1.333709  |
| POLE      | -1.3956113 |
| POLI      | -0.8122003 |
| POLK      | -0.5334151 |
| POLQ      | -2.8277116 |
| POLR2A    | -0.8482094 |
| POLR3F    | -1.3225219 |
| POLR3H    | -2.86563   |
| POM121L12 | -5.9410453 |
| POM121L2  | -2.5101657 |
| POMC      | -0.4081616 |
| POPDC2    | -1.6881781 |
| POPDC3    | -4.389057  |
| POSTN     | -2.8543005 |

|            |            |
|------------|------------|
| POTEG      | -4.0344095 |
| POU2AF1    | -1.887197  |
| POU2F3     | -1.8604205 |
| POU3F1     | -2.632001  |
| POU3F2     | -5.056535  |
| POU3F4     | -1.3058631 |
| POU4F3     | -1.9549985 |
| POU5F1     | -2.2617373 |
| POU6F2     | -0.5213521 |
| PPAPDC1A   | -3.3165653 |
| PPBP       | -3.3263972 |
| PPEF1      | -2.6697752 |
| PPEF2      | -3.7937548 |
| PPFIA2     | -2.4054513 |
| PPFIA4     | -2.4013383 |
| PPIC       | -1.8697722 |
| PPIE       | -0.8603468 |
| PPIL2      | -0.7020242 |
| PPIL6      | -2.0857646 |
| PPL        | -0.3710773 |
| PPM1J      | -0.905638  |
| PPM1M      | -0.5731843 |
| PPP1R12B   | -2.210868  |
| PPP1R13B   | -0.3010056 |
| PPP1R14A   | -4.207221  |
| PPP1R14D   | -4.3389864 |
| PPP1R16B   | -4.802286  |
| PPP1R18    | -2.8807003 |
| PPP1R1B    | -2.5823956 |
| PPP1R26    | -3.5386963 |
| PPP1R27    | -0.4108522 |
| PPP1R2-PS9 | -1.4690661 |
| PPP1R32    | -2.3845105 |
| PPP1R36    | -3.5447934 |
| PPP1R3C    | -0.6759257 |
| PPP1R3D    | -0.8928642 |
| PPP1R3F    | -2.2223382 |
| PPP1R8     | -0.5153644 |
| PPP1R9A    | -0.8676758 |
| PPP1R9B    | -0.7317832 |
| PPP2R2B    | -2.6264853 |
| PPP2R2C    | -3.6856527 |
| PPP2R3A    | -2.6397731 |
| PPP3R2     | -2.4585092 |
| PPY        | -4.2411556 |



|            |            |
|------------|------------|
| PQLC3      | -2.4849372 |
| PRAMEF12O5 | -2.4497206 |
| PRAMEL     | -4.380892  |
| PRAMEL1    | -2.6243901 |
| PRAMEL7    | -6.6335564 |
| PRAP1      | -4.1184464 |
| PRB1       | -4.3035946 |
| PRC1       | -1.2892413 |
| PRDM1      | -0.5856099 |
| PRDM10     | -0.7515791 |
| PRDM11     | -2.050859  |
| PRDM12     | -1.587733  |
| PRDM15     | -3.488546  |
| PRDM16     | -3.2609    |
| PRDM5      | -2.1524167 |
| PRDM8      | -3.7999346 |
| PRDM9      | -1.432436  |
| PRDX6      | -1.0881145 |
| PRELP      | -2.9003277 |
| PREX2      | -4.878129  |
| PRF1       | -0.8277667 |
| PRG2       | -4.37074   |
| PRG3       | -2.8113496 |
| PRH1       | -0.8841667 |
| PRICKLE1   | -1.8695328 |
| PRICKLE2   | -5.8090897 |
| PRICKLE4   | -4.561343  |
| PRIM2      | -1.374228  |
| PRKAB1     | -1.7789116 |
| PRKAG2OS1  | -3.7444365 |
| PRKAG3     | -3.7855468 |
| PRKAR1B    | -2.3052728 |
| PRKAR2B    | -2.2717633 |
| PRKCA      | -1.2920756 |
| PRKCDBP    | -2.9422917 |
| PRKCH      | -1.8094308 |
| PRKCI      | -0.837435  |
| PRKCQ      | -1.0938756 |
| PRKD1      | -3.7595022 |
| PRKG1      | -3.4366632 |
| PRKG2      | -5.303439  |
| PRL2B1     | -4.3473673 |
| PRL2C1     | -3.9979649 |
| PRL2C5     | -1.6518757 |
| PRL3A1     | -5.6622934 |

|         |            |
|---------|------------|
| PRL3B1  | -2.5428205 |
| PRL3C1  | -2.538814  |
| PRL3D1  | -2.7659254 |
| PRL4A1  | -3.370675  |
| PRL6A1  | -2.4447637 |
| PRL7A1  | -4.7450066 |
| PRL7C1  | -2.4402964 |
| PRL8A6  | -1.886421  |
| PRL8A8  | -1.5458536 |
| PRLH    | -2.7307181 |
| PRM2    | -3.9156091 |
| PRM3    | -2.293046  |
| PRMT2   | -1.9288571 |
| PRMT8   | -5.7108345 |
| PRN     | -0.9481409 |
| PROCA1  | -5.3960457 |
| PROKR1  | -2.5701587 |
| PROM1   | -1.0124974 |
| PROM2   | -2.796719  |
| PROP1   | -3.422495  |
| PROSER1 | -2.3003206 |
| PRP2    | -2.0737176 |
| PRPH    | -5.656418  |
| PRPH2   | -1.8799059 |
| PRPMP5  | -3.3121245 |
| PRPS1L1 | -1.9324248 |
| PRPS2   | -1.3396652 |
| PRR11   | -1.0967808 |
| PRR12   | -2.1612074 |
| PRR13   | -0.6204488 |
| PRR15   | -1.2470615 |
| PRR15L  | -5.50858   |
| PRR18   | -5.7959156 |
| PRR19   | -5.070275  |
| PRR3    | -0.6673229 |
| PRR30   | -4.517122  |
| PRR5L   | -1.2435405 |
| PRR7    | -1.1365316 |
| PRR9    | -1.8152652 |
| PRRC2B  | -0.5932233 |
| PRRG1   | -1.5148706 |
| PRRG4   | -0.8397126 |
| PRRT1   | -1.9122949 |
| PRRT2   | -5.853476  |
| PRRT4   | -3.3603048 |

|          |            |
|----------|------------|
| PRRX1    | -1.7433698 |
| PRRX2    | -1.4149597 |
| PRRXL1   | -2.7746775 |
| PRSS12   | -5.8127565 |
| PRSS16   | -2.8841102 |
| PRSS2    | -3.6169083 |
| PRSS22   | -3.419889  |
| PRSS23   | -1.641684  |
| PRSS23OS | -3.1434216 |
| PRSS27   | -2.4168677 |
| PRSS28   | -5.5193005 |
| PRSS33   | -2.5604725 |
| PRSS34   | -4.7509947 |
| PRSS42   | -5.359644  |
| PRSS44   | -3.424575  |
| PRSS48   | -0.3538091 |
| PRSS50   | -1.486824  |
| PRSS52   | -3.4166017 |
| PRSS54   | -6.5101004 |
| PRSS56   | -2.5361028 |
| PRSS57   | -0.9736636 |
| PRSS58   | -4.7327833 |
| PRSS8    | -1.24933   |
| PRTN3    | -2.6586494 |
| PRUNE    | -1.0204132 |
| PRUNE2   | -2.2796361 |
| PRX      | -6.772603  |
| PSAPL1   | -3.4812405 |
| PSCA     | -2.26211   |
| PSD2     | -2.8559427 |
| PSD4     | -1.4364877 |
| PSG18    | -3.5139117 |
| PSG19    | -3.1898222 |
| PSG21    | -4.1986256 |
| PSG25    | -3.8734455 |
| PSG27    | -1.7672443 |
| PSG28    | -3.2962646 |
| PSMA8    | -0.7002802 |
| PSMB11   | -4.1563034 |
| PSMC3IP  | -4.7224264 |
| PSTK     | -0.4520729 |
| PSTPIP1  | -1.1392808 |
| PTAFR    | -1.2091768 |
| PTCD1    | -0.7554569 |
| PTCH1    | -1.7488027 |

|         |            |
|---------|------------|
| PTCHD2  | -2.8048725 |
| PTCRA   | -5.222562  |
| PTF1A   | -4.689329  |
| PTGDR2  | -5.287161  |
| PTGDS   | -0.3311579 |
| PTGER1  | -2.3379807 |
| PTGER2  | -0.5107117 |
| PTGES3L | -0.5114918 |
| PTGFR   | -2.6984155 |
| PTGFRN  | -2.8048434 |
| PTGIS   | -3.4824302 |
| PTGR1   | -2.2830904 |
| PTGS1   | -0.9443672 |
| PTH1R   | -0.4328601 |
| PTH2    | -1.9661126 |
| PTHLH   | -3.0186489 |
| PTK2B   | -0.7910297 |
| PTN     | -5.1992216 |
| PTP4A3  | -1.8841007 |
| PTPLAD2 | -3.621326  |
| PTPN13  | -1.6436341 |
| PTPN18  | -1.7298439 |
| PTPN20  | -5.033429  |
| PTPN7   | -1.6101906 |
| PTPRB   | -2.734308  |
| PTPRC   | -0.5122116 |
| PTPRCAP | -1.0445287 |
| PTPRE   | -0.5131409 |
| PTPRG   | -0.3919745 |
| PTPRM   | -3.2053742 |
| PTPRN   | -4.22484   |
| PTPRN2  | -1.4920895 |
| PTPRO   | -2.8361502 |
| PTPRQ   | -3.8509445 |
| PTPRR   | -2.6290045 |
| PTPRS   | -3.2301672 |
| PTPRU   | -3.832976  |
| PTPRV   | -2.431461  |
| PTPRZ1  | -3.3217704 |
| PTRF    | -3.8509648 |
| PTTG1   | -0.4841158 |
| PVALB   | -1.9268818 |
| PVRL3   | -1.6524374 |
| PVRL4   | -1.3201516 |
| PVT1    | -0.8356357 |

|             |            |
|-------------|------------|
| PWWP2B      | -1.2703378 |
| PXDN        | -2.9926052 |
| PXT1        | -4.414939  |
| PYGB        | -0.8639309 |
| PYGM        | -2.0751708 |
| PYROXD1     | -1.2477436 |
| QK          | -0.9183385 |
| QRFP        | -3.770862  |
| QRFPR       | -2.8699079 |
| QTRT1       | -2.2462342 |
| R3HDM4      | -0.375248  |
| R3HDML      | -2.6590395 |
| R74862      | -1.477035  |
| RAB11FIP1   | -1.6617527 |
| RAB11FIP2   | -6.4266067 |
| RAB11FIP3   | -0.6775982 |
| RAB11FIP4O9 | -4.874097  |
| RAB11FIP5   | -1.4890597 |
| RAB15       | -4.3182034 |
| RAB19       | -1.976156  |
| RAB25       | -4.3276224 |
| RAB27A      | -3.2789927 |
| RAB27B      | -4.4312563 |
| RAB38       | -0.5240505 |
| RAB3A       | -2.466708  |
| RAB3B       | -1.7274327 |
| RAB3D       | -2.1212294 |
| RAB3IL1     | -0.6336696 |
| RAB40B      | -2.975441  |
| RAB44       | -0.7351081 |
| RAB6B       | -4.7410297 |
| RAB9B       | -1.3851905 |
| RABGAP1L    | -1.504935  |
| RACGAP1     | -1.0997841 |
| RAD51AP1    | -2.4219525 |
| RAD54L      | -2.2912939 |
| RAD9A       | -0.8241558 |
| RADIL       | -4.0382795 |
| RAET1A      | -2.0244584 |
| RAET1B      | -1.0995777 |
| RALYL       | -1.9149554 |
| RAMP1       | -2.631972  |
| RAMP2       | -3.1697938 |
| RAMP3       | -0.3967619 |
| RANBP17     | -2.6554046 |

|          |            |
|----------|------------|
| RANBP3L  | -1.8836162 |
| RAP1GAP2 | -3.441936  |
| RAPGEF3  | -1.1377842 |
| RARG     | -2.5339277 |
| RASA3    | -0.9959948 |
| RASAL2   | -2.31607   |
| RASEF    | -4.283022  |
| RASGEF1A | -7.571888  |
| RASGEF1C | -4.0140495 |
| RASGRF1  | -2.4156754 |
| RASGRF2  | -3.5903392 |
| RASGRP2  | -1.125803  |
| RASGRP3  | -3.6955874 |
| RASGRP4  | -2.9716399 |
| RASL10A  | -4.9516296 |
| RASL11A  | -2.589026  |
| RASL11B  | -2.4672446 |
| RASL12   | -5.670597  |
| RASSF9   | -4.787284  |
| RAVER2   | -0.454437  |
| RAX      | -7.01558   |
| RB1CC1   | -3.9927747 |
| RBAKDN   | -3.6232352 |
| RBFOX1   | -2.82344   |
| RBFOX3   | -1.717408  |
| RBL1     | -0.5879443 |
| RBM15B   | -1.5802836 |
| RBM20    | -2.7866907 |
| RBM24    | -3.2436402 |
| RBM38    | -3.9116747 |
| RBM46OS  | -2.7299242 |
| RBMS3    | -2.3112786 |
| RBMY     | -2.1217408 |
| RBP1     | -0.7932775 |
| RBP2     | -3.5540164 |
| RBP3     | -0.2742288 |
| RBP7     | -5.2907953 |
| RBPJ     | -0.6768911 |
| RBPJL    | -5.3014526 |
| RCAN3    | -0.4355481 |
| RCN3     | -1.4471724 |
| RCOR2    | -3.683941  |
| RCSD1    | -2.1140935 |
| RCVRN    | -1.8941164 |
| RDH18-PS | -3.2174802 |

|        |            |
|--------|------------|
| RDH19  | -3.271196  |
| RDH8   | -1.8087342 |
| RDM1   | -1.34356   |
| REC8   | -1.2680585 |
| RECK   | -2.918188  |
| RECQL  | -1.4241803 |
| RECQL4 | -1.8020344 |
| REDRUM | -2.4966455 |
| REEP1  | -2.313813  |
| REEP2  | -3.977968  |
| REEP5  | -1.3912857 |
| REG1   | -2.9390597 |
| REG2   | -3.4695132 |
| REG3A  | -1.2312338 |
| REL    | -4.422238  |
| REM1   | -1.5376267 |
| REM2   | -3.0449314 |
| REP15  | -1.7655942 |
| RESP18 | -1.3549979 |
| RETN   | -4.297381  |
| RETNLA | -10.271285 |
| RETNLB | -1.8681254 |
| RETNLG | -1.7562153 |
| REX2   | -1.6433754 |
| RFC3   | -0.8925819 |
| RFESD  | -1.5286574 |
| RFFL   | -0.5067895 |
| RFPL4  | -2.5581949 |
| RFPL4B | -2.6301332 |
| RFTN2  | -4.91949   |
| RFX2   | -1.6015201 |
| RFX4   | -2.5341647 |
| RFX7   | -0.8569405 |
| RGAG1  | -5.9332943 |
| RGAG4  | -0.6097467 |
| RGCC   | -2.7657058 |
| RGL2   | -0.5267398 |
| RGMA   | -1.6878264 |
| RGMB   | -1.4143367 |
| RGR    | -3.3806624 |
| RGS10  | -1.135474  |
| RGS12  | -0.2989523 |
| RGS13  | -2.9752932 |
| RGS14  | -1.7862594 |
| RGS17  | -2.7485552 |

|        |            |
|--------|------------|
| RGS18  | -2.4666252 |
| RGS21  | -2.6110828 |
| RGS22  | -3.1405456 |
| RGS3   | -1.5634587 |
| RGS6   | -3.3784876 |
| RGS7   | -3.6616592 |
| RGS7BP | -2.1676986 |
| RGS8   | -1.8120847 |
| RGS9   | -3.8439686 |
| RGS9BP | -1.8076749 |
| RHAG   | -2.6879761 |
| RHBDD1 | -2.8887064 |
| RHBDL2 | -5.9851627 |
| RHBDL3 | -3.597326  |
| RHCG   | -4.4369364 |
| RHD    | -2.29269   |
| RHOF   | -1.3594227 |
| RHOH   | -2.3071449 |
| RHOV   | -2.136506  |
| RHOX10 | -4.9929705 |
| RHOX11 | -2.353248  |
| RHOX12 | -4.172882  |
| RHOX13 | -3.3854802 |
| RHOX2C | -3.3244646 |
| RHOX2E | -4.685556  |
| RHOX2H | -3.552929  |
| RHOX3E | -3.4060683 |
| RHOX3F | -3.2722483 |
| RHOX3G | -3.1512704 |
| RHOX3H | -3.334724  |
| RHOX4A | -6.2904634 |
| RHOX4E | -4.2774506 |
| RHOX4G | -4.817008  |
| RHOX5  | -0.3665102 |
| RHOX7  | -2.8489914 |
| RHOX9  | -1.4259651 |
| RHPN1  | -1.8752775 |
| RHPN2  | -0.9608061 |
| RIBC2  | -3.1032364 |
| RIIAD1 | -3.7784362 |
| RIMBP3 | -3.1473591 |
| RIMS1  | -5.2187195 |
| RIMS2  | -1.7291651 |
| RIN1   | -3.9736352 |
| RIN2   | -0.6086991 |



|         |            |
|---------|------------|
| RIN3    | -0.8670495 |
| RINL    | -2.5119398 |
| RIPPLY1 | -3.4229195 |
| RIPPLY3 | -3.3117816 |
| RITA1   | -0.7457185 |
| RLBP1   | -3.2312133 |
| RLN1    | -3.0112824 |
| RLN3    | -3.2005074 |
| RLTPR   | -0.6265476 |
| RMI1    | -0.3997967 |
| RNASE1  | -4.0449705 |
| RNASE2A | -3.895213  |
| RNASE2B | -0.7678959 |
| RNASE6  | -3.3338313 |
| RNF112  | -2.5850914 |
| RNF122  | -2.978698  |
| RNF144A | -2.4898295 |
| RNF150  | -2.702804  |
| RNF151  | -5.964525  |
| RNF165  | -1.5027673 |
| RNF180  | -2.7753336 |
| RNF186  | -1.6228292 |
| RNF207  | -4.2930365 |
| RNF208  | -3.160699  |
| RNF212  | -3.2521687 |
| RNF32   | -4.085266  |
| ROBO2   | -3.3267896 |
| ROR1    | -2.8007617 |
| ROR2    | -1.8355517 |
| RORB    | -3.3435674 |
| ROS1    | -1.9663775 |
| RPE65   | -4.600025  |
| RPGR    | -1.2654016 |
| RPH3A   | -3.5506613 |
| RPH3AL  | -1.8057132 |
| RPIA    | -0.3816237 |
| RPL10L  | -3.0688896 |
| RPP25   | -5.574256  |
| RPRD1A  | -0.6397572 |
| RPRM    | -4.2750187 |
| RPRML   | -3.5153089 |
| RPS6KA2 | -3.552968  |
| RPS6KA6 | -1.5365849 |
| RPTN    | -7.028225  |
| RPTOROS | -0.4926846 |

|          |            |
|----------|------------|
| RPUSD1   | -1.9204144 |
| RRAD     | -1.1103103 |
| RRAGB    | -1.3018351 |
| RRAGD    | -1.9811177 |
| RRM2B    | -1.7314293 |
| RRP12    | -1.3588662 |
| RSF1     | -1.0252542 |
| RSPH1    | -4.6844068 |
| RSPH10B  | -4.1143284 |
| RSPH6A   | -5.134808  |
| RSPH9    | -2.7552    |
| RSPO1    | -4.87467   |
| RSPO4    | -3.3644824 |
| RSRC1    | -1.6914787 |
| RTBDN    | -2.6882005 |
| RTCA     | -0.7609103 |
| RTDR1    | -3.3191793 |
| RTKN     | -0.8131783 |
| RTKN2    | -6.5114145 |
| RTN1     | -2.1442437 |
| RTN2     | -3.0175142 |
| RTP2     | -1.1953752 |
| RTTN     | -2.0339332 |
| RUFY4    | -2.4259415 |
| RUNX1T1  | -4.253458  |
| RUNX2    | -2.6064024 |
| RUNX2OS1 | -3.0573719 |
| RUNX3    | -1.0671378 |
| RWDD2A   | -4.624442  |
| RXFP2    | -1.6887779 |
| RXFP3    | -1.8261669 |
| RYR1     | -2.5325356 |
| RYR2     | -3.4457164 |
| RYR3     | -3.1446717 |
| S100A14  | -5.75198   |
| S100A16  | -0.3144066 |
| S100A2   | -3.432939  |
| S100A3   | -1.716402  |
| S100A4   | -2.1213229 |
| S100A5   | -1.035064  |
| S100A6   | -2.2071846 |
| S100B    | -2.7148771 |
| S100G    | -4.490803  |
| S1PR3    | -0.8258474 |
| S1PR4    | -3.0879364 |

|            |            |
|------------|------------|
| S1PR5      | -2.3261056 |
| SAAL1      | -0.5962732 |
| SAG        | -1.3003066 |
| SALL2      | -2.387023  |
| SAMD11     | -3.2773297 |
| SAMD12     | -3.574592  |
| SAMD3      | -3.1183383 |
| SAMD4      | -1.1571052 |
| SAMD5      | -2.2590063 |
| SAMT2      | -2.3117857 |
| SAPCD1     | -2.8053002 |
| SARM1      | -2.5806656 |
| SASH3      | -0.6796341 |
| SASS6      | -1.3869355 |
| SATB2      | -1.8870616 |
| SATL1      | -1.5945928 |
| SAYSD1     | -1.1893623 |
| SBK1       | -2.9261808 |
| SBK2       | -3.3672776 |
| SBK3       | -4.1079526 |
| SBPL       | -3.7013726 |
| SBSN       | -2.9331465 |
| SCARF2     | -2.58758   |
| SCARLETLTR | -5.755546  |
| SCD1       | -0.7578623 |
| SCD2       | -2.611366  |
| SCD3       | -1.2324204 |
| SCEL       | -5.536871  |
| SCG3       | -2.6198862 |
| SCGB1A1    | -11.631142 |
| SCGB1B19   | -4.0878925 |
| SCGB1B2    | -5.2853646 |
| SCGB1B20   | -3.1463606 |
| SCGB1B3    | -2.2344582 |
| SCGB1B30   | -0.5922685 |
| SCGB1B7    | -3.281064  |
| SCGB1C1    | -5.4079876 |
| SCGB2B20   | -0.9674518 |
| SCGB2B26   | -3.5708253 |
| SCGB2B27   | -3.501042  |
| SCGB3A1    | -10.351069 |
| SCGB3A2    | -7.3821807 |
| SCHIP1     | -2.542669  |
| SCIN       | -2.4306836 |
| SCML2      | -6.339472  |

|         |            |
|---------|------------|
| SCN1A   | -2.1221235 |
| SCN2A1  | -2.6313999 |
| SCN2B   | -1.1877842 |
| SCN3A   | -3.2582932 |
| SCN3B   | -2.9560387 |
| SCN4A   | -1.5691404 |
| SCN4B   | -3.592453  |
| SCN7A   | -5.829031  |
| SCNN1A  | -4.566326  |
| SCNN1B  | -6.118347  |
| SCP2D1  | -3.1912897 |
| SCRN1   | -6.0275664 |
| SCRT2   | -1.1952174 |
| SCT     | -3.9029698 |
| SCUBE1  | -3.498005  |
| SCUBE2  | -5.3178034 |
| SCUBE3  | -3.6244955 |
| SCX     | -4.480941  |
| SDC3    | -0.4079664 |
| SDHD    | -2.017948  |
| SDK1    | -2.1864123 |
| SDK2    | -1.4893172 |
| SDPR    | -4.119483  |
| SDR9C7  | -4.2554893 |
| SEC14L1 | -1.2177896 |
| SEC14L3 | -7.793702  |
| SEC14L5 | -3.0994473 |
| SEC22A  | -2.346045  |
| SEC22C  | -2.586629  |
| SELM    | -1.5179005 |
| SELPLG  | -0.974469  |
| SEMA3A  | -2.7034657 |
| SEMA3B  | -5.1176176 |
| SEMA3C  | -7.2651186 |
| SEMA3D  | -2.534909  |
| SEMA3E  | -4.1948843 |
| SEMA3F  | -0.5820358 |
| SEMA3G  | -5.5244713 |
| SEMA4D  | -1.0148945 |
| SEMA5A  | -5.556715  |
| SEMA5B  | -2.7966118 |
| SEMA6A  | -2.1658628 |
| SEMA6C  | -2.0175352 |
| SEMA7A  | -2.6044843 |
| SENP6   | -1.124434  |

|           |            |
|-----------|------------|
| SERP2     | -2.0204747 |
| SERPINA1F | -2.0877926 |
| SERPINA3A | -1.5401862 |
| SERPINA3J | -2.5297964 |
| SERPINA9  | -4.1646323 |
| SERPINB10 | -3.5322917 |
| SERPINB12 | -2.7086482 |
| SERPINB1C | -2.5653439 |
| SERPINB3A | -4.761065  |
| SERPINB3B | -4.914999  |
| SERPINB3D | -4.707     |
| SERPINB6A | -0.4713605 |
| SERPINB6B | -2.0090778 |
| SERPINB6C | -1.2439625 |
| SERPINB6D | -4.9222193 |
| SERPINB6E | -3.2591524 |
| SERPINB9  | -0.9848206 |
| SERPINB9F | -2.5414567 |
| SERPINE2  | -4.257124  |
| SERPINH1  | -1.1720221 |
| SERPINI1  | -2.1863387 |
| SERPINI2  | -3.7557569 |
| SESTD1    | -1.1923993 |
| SETBP1    | -1.9942672 |
| SETDB2    | -1.0446012 |
| SEZ6      | -1.4597538 |
| SEZ6L2    | -1.150778  |
| SF3B1     | -1.1502559 |
| SFMBT2    | -1.2492476 |
| SFRP2     | -4.2557497 |
| SFRP5     | -2.7276883 |
| SFTA2     | -7.210865  |
| SFTPA1    | -9.34827   |
| SFTPB     | -10.74436  |
| SFTPC     | -12.476255 |
| SFTPD     | -3.8211005 |
| SFXN3     | -1.4093096 |
| SFXN4     | -5.507055  |
| SFXN5     | -2.8813012 |
| SGCA      | -5.6109495 |
| SGCD      | -4.801014  |
| SGCE      | -0.7923176 |
| SGCG      | -4.0503426 |
| SGCZ      | -2.31402   |
| SGIP1     | -3.6705422 |

|          |            |
|----------|------------|
| SGOL1    | -0.9405963 |
| SGOL2    | -1.3149273 |
| SGTB     | -3.8506284 |
| SH2D1B1  | -3.0743744 |
| SH2D1B2  | -5.3242946 |
| SH2D2A   | -3.440356  |
| SH2D5    | -3.4270306 |
| SH2D6    | -2.0229385 |
| SH2D7    | -3.9478862 |
| SH3BGR   | -3.889637  |
| SH3BP1   | -2.839321  |
| SH3BP4   | -4.707792  |
| SH3D21   | -1.8379278 |
| SH3GL3   | -2.4089866 |
| SH3KBP1  | -0.7164297 |
| SH3RF1   | -2.6439044 |
| SH3RF2   | -4.8297763 |
| SH3RF3   | -4.2585692 |
| SH3TC1   | -0.4560163 |
| SH3TC2   | -3.883348  |
| SHANK1   | -0.890465  |
| SHANK2   | -2.4402156 |
| SHANK3   | -0.2716062 |
| SHBG     | -5.486718  |
| SHC2     | -1.1011677 |
| SHCBP1L  | -4.200076  |
| SHD      | -4.353591  |
| SHE      | -1.567591  |
| SHH      | -2.830828  |
| SHISA2   | -3.3242931 |
| SHISA4   | -3.7093234 |
| SHISA7   | -3.431901  |
| SHOX2    | -2.9502685 |
| SHROOM3  | -5.199319  |
| SHROOM4  | -3.9491415 |
| SIAH3    | -2.66999   |
| SIDT1    | -1.5361583 |
| SIGLEC15 | -3.1381614 |
| SIGLEC5  | -4.0980806 |
| SIPA1    | -0.2412417 |
| SIPA1L2  | -1.0593874 |
| SIPA1L3  | -1.1502488 |
| SIRPB1A  | -2.367754  |
| SIRPB1B  | -2.1647284 |
| SIRT6    | -0.6994121 |

|          |            |
|----------|------------|
| SIS      | -3.7968776 |
| SIT1     | -1.9317217 |
| SIVA1    | -0.654495  |
| SIX1     | -3.6890311 |
| SIX2     | -2.8061304 |
| SIX3     | -3.6612163 |
| SIX3OS1  | -2.9515274 |
| SIX4     | -3.851761  |
| SIX6     | -2.0670645 |
| SKA1     | -0.7679336 |
| SKA3     | -0.4890366 |
| SKAP1    | -1.2642145 |
| SKI      | -1.5148602 |
| SKIDA1   | -3.7460284 |
| SKINT1   | -3.7715344 |
| SKINT10  | -1.3941143 |
| SKINT11  | -2.0554867 |
| SKINT2   | -2.6090398 |
| SKINT4   | -3.726702  |
| SKINT5   | -2.0513597 |
| SKINT6   | -2.69405   |
| SKINT8   | -3.642172  |
| SKOR1    | -2.4349928 |
| SLA2     | -1.0939357 |
| SLAIN1   | -1.5280836 |
| SLC10A4  | -4.1555986 |
| SLC10A5  | -1.1199522 |
| SLC12A2  | -1.3708179 |
| SLC12A3  | -5.0632544 |
| SLC12A6  | -0.5892773 |
| SLC13A2  | -4.978138  |
| SLC13A4  | -1.6749432 |
| SLC14A2  | -0.8395937 |
| SLC16A1  | -2.0417914 |
| SLC16A11 | -0.8771164 |
| SLC16A8  | -0.8397639 |
| SLC16A9  | -0.983721  |
| SLC17A8  | -1.4206855 |
| SLC18B1  | -1.4223478 |
| SLC19A3  | -2.9238734 |
| SLC1A1   | -3.0164304 |
| SLC1A3   | -4.3419123 |
| SLC1A5   | -1.4800968 |
| SLC1A7   | -3.7660089 |
| SLC22A1  | -0.908807  |

|           |            |
|-----------|------------|
| SLC22A12  | -2.4597328 |
| SLC22A14  | -2.7306867 |
| SLC22A17  | -1.8759377 |
| SLC22A2   | -3.0090997 |
| SLC22A20  | -2.6081548 |
| SLC22A22  | -3.251623  |
| SLC22A23  | -0.5773909 |
| SLC22A30  | -2.7065756 |
| SLC22A4   | -2.163182  |
| SLC24A1   | -2.2484677 |
| SLC24A3   | -2.3613951 |
| SLC24A4   | -5.084895  |
| SLC25A18  | -3.2504222 |
| SLC25A23  | -2.4196494 |
| SLC25A24  | -0.8826673 |
| SLC25A31  | -2.9752274 |
| SLC25A35  | -2.767344  |
| SLC25A36  | -1.0680926 |
| SLC25A4   | -0.9033606 |
| SLC25A43  | -3.7748075 |
| SLC25A48  | -0.9930857 |
| SLC26A10  | -2.7846258 |
| SLC26A4   | -4.7327156 |
| SLC26A5   | -3.7437468 |
| SLC26A9   | -2.5983903 |
| SLC27A1   | -1.7448769 |
| SLC27A3   | -2.6610382 |
| SLC27A6   | -3.2957497 |
| SLC28A1   | -0.8151653 |
| SLC28A3   | -2.229229  |
| SLC29A3   | -0.9288054 |
| SLC29A4   | -3.5080566 |
| SLC2A10   | -3.3843637 |
| SLC2A13   | -3.5163424 |
| SLC2A4    | -4.244582  |
| SLC2A7    | -3.5455344 |
| SLC30A2   | -1.8157682 |
| SLC32A1   | -2.338449  |
| SLC34A2   | -7.44915   |
| SLC35A5   | -2.3652122 |
| SLC35E4   | -0.5899389 |
| SLC35F3   | -2.6895077 |
| SLC35G2   | -1.4942436 |
| SLC35G3   | -2.1896458 |
| SLC36A1OS | -2.4014153 |



|           |            |
|-----------|------------|
| SLC36A2   | -5.639025  |
| SLC36A3   | -2.159306  |
| SLC37A2   | -2.1840851 |
| SLC38A10  | -1.5893569 |
| SLC38A11  | -3.0862217 |
| SLC38A5   | -3.4524784 |
| SLC38A9   | -0.8118854 |
| SLC39A5   | -4.271451  |
| SLC39A8   | -1.3265145 |
| SLC44A2   | -1.4358766 |
| SLC44A3   | -3.4543219 |
| SLC44A4   | -2.4556956 |
| SLC45A1   | -1.0934436 |
| SLC45A2   | -3.4101954 |
| SLC4A1    | -0.6444306 |
| SLC4A11   | -1.4208913 |
| SLC4A3    | -2.7148657 |
| SLC4A5    | -3.1081657 |
| SLC4A8    | -2.6354904 |
| SLC51A    | -4.784477  |
| SLC52A2   | -0.7043593 |
| SLC52A3   | -3.4428115 |
| SLC5A1    | -2.732851  |
| SLC5A10   | -2.719633  |
| SLC5A11   | -3.4909663 |
| SLC5A12   | -4.326432  |
| SLC5A2    | -2.3759694 |
| SLC5A3    | -0.842623  |
| SLC5A4A   | -4.9014654 |
| SLC5A8    | -3.412466  |
| SLC5A9    | -3.6040154 |
| SLC6A1    | -4.23798   |
| SLC6A14   | -4.687848  |
| SLC6A16   | -3.1473336 |
| SLC6A17   | -4.0615015 |
| SLC6A18   | -3.2473917 |
| SLC6A19OS | -2.7904766 |
| SLC6A2    | -5.166776  |
| SLC6A20A  | -2.1077414 |
| SLC6A4    | -3.1289964 |
| SLC6A7    | -1.4157372 |
| SLC7A10   | -6.434286  |
| SLC7A13   | -2.7162094 |
| SLC7A14   | -2.4343178 |
| SLC7A15   | -1.6903605 |

|          |            |
|----------|------------|
| SLC7A6   | -1.9728186 |
| SLC8A1   | -1.7310753 |
| SLC8A2   | -2.6207347 |
| SLC9A2   | -2.859381  |
| SLC9A3R2 | -3.6963472 |
| SLC9A5   | -2.028627  |
| SLC9A9   | -4.747818  |
| SLC9B1   | -5.009367  |
| SLC9B2   | -2.4660993 |
| SLCO2A1  | -1.0777252 |
| SLCO4A1  | -1.4538479 |
| SLCO4C1  | -4.1278763 |
| SLCO5A1  | -3.3611395 |
| SLCO6C1  | -3.0759032 |
| SLIT1    | -0.436301  |
| SLIT2    | -5.405078  |
| SLIT3    | -3.1956348 |
| SLITRK3  | -5.4706917 |
| SLITRK4  | -5.1083436 |
| SLITRK5  | -3.9034364 |
| SLITRK6  | -4.1140337 |
| SLN      | -7.62984   |
| SLURP1   | -3.6019454 |
| SLX1B    | -0.741941  |
| SLY      | -2.1760802 |
| SMAD6    | -2.4042156 |
| SMAD7    | -1.1885035 |
| SMAD9    | -2.7662446 |
| SMARCA1  | -1.6991189 |
| SMARCA2  | -0.920661  |
| SMARCAL1 | -0.4981401 |
| SMARCD1  | -1.4581425 |
| SMARCD3  | -4.0662766 |
| SMC1B    | -0.8651457 |
| SMCO2    | -0.8707945 |
| SMCO3    | -2.1510782 |
| SMCP     | -4.3912945 |
| SMEK3-PS | -1.4298282 |
| SMIM1    | -2.011443  |
| SMIM22   | -0.6408441 |
| SMIM24   | -1.2724111 |
| SMIM5    | -4.313048  |
| SMIM6    | -1.3217893 |
| SMOK3B   | -1.2082582 |
| SMOK4A   | -4.3205557 |

|         |            |
|---------|------------|
| SMPD5   | -1.1950791 |
| SMPX    | -2.6638522 |
| SMS     | -0.2700613 |
| SMTNL1  | -3.3901088 |
| SMTNL2  | -2.0216835 |
| SMURF1  | -0.7034793 |
| SMYD3   | -0.7247198 |
| SNAI1   | -0.9614201 |
| SNAI3   | -3.8979867 |
| SNCA    | -1.1569307 |
| SNCAIP  | -1.3214061 |
| SNCB    | -2.3750563 |
| SNCG    | -4.0446815 |
| SNED1   | -2.7250822 |
| SNHG11  | -4.226285  |
| SNHG18  | -1.5673568 |
| SNHG7OS | -1.2306981 |
| SNHG8   | -2.2791555 |
| SNN     | -2.9719493 |
| SNORA47 | -0.903297  |
| SNTN    | -2.839973  |
| SNX22   | -1.9800444 |
| SNX25   | -0.7388108 |
| SNX29   | -1.166856  |
| SOAT1   | -1.3419392 |
| SOBP    | -3.3215115 |
| SOCS5   | -1.1051314 |
| SOGA1   | -2.3790655 |
| SOGA3   | -4.4960284 |
| SOHLH1  | -3.3104115 |
| SOHLH2  | -0.488534  |
| SORCS1  | -3.8545585 |
| SORCS2  | -4.1989594 |
| SORL1   | -2.7720728 |
| SORT1   | -3.0311263 |
| SOX1    | -1.1525998 |
| SOX12   | -4.169686  |
| SOX14   | -2.3727512 |
| SOX15   | -1.7069416 |
| SOX17   | -4.327808  |
| SOX18   | -3.8092122 |
| SOX2    | -2.3998513 |
| SOX21   | -1.2736607 |
| SOX3    | -2.995965  |
| SOX30   | -7.2529683 |

|            |            |
|------------|------------|
| SOX4       | -2.5819635 |
| SOX5OS1    | -2.250911  |
| SOX6OS     | -2.259608  |
| SOX7       | -2.7606082 |
| SP3OS      | -0.8977842 |
| SP5        | -1.1626725 |
| SP6        | -1.7455766 |
| SP9        | -4.620749  |
| SPA17      | -1.8656583 |
| SPACA1     | -2.2030065 |
| SPACA4     | -2.1708772 |
| SPACA7     | -3.328219  |
| SPAG1      | -1.5396624 |
| SPAG11B    | -2.4559214 |
| SPAG17     | -2.4794512 |
| SPAG17OS   | -3.5119398 |
| SPAG4      | -3.4263105 |
| SPAG5      | -2.6279504 |
| SPAG6      | -4.5160403 |
| SPAG8      | -4.5370255 |
| SPAM1      | -2.5577638 |
| SPARC      | -0.4432762 |
| SPARCL1    | -5.912707  |
| SPATA17    | -2.6846783 |
| SPATA18    | -2.9421377 |
| SPATA20    | -3.5131226 |
| SPATA21    | -2.4792552 |
| SPATA24    | -1.7277243 |
| SPATA2L    | -1.8804269 |
| SPATA31    | -2.9245245 |
| SPATA31D1A | -0.3690572 |
| SPATA31D1B | -3.3441603 |
| SPATA31D1D | -3.8680677 |
| SPATA33    | -6.280678  |
| SPATA4     | -4.8856645 |
| SPATA45    | -2.7687585 |
| SPATA6     | -0.9454746 |
| SPATC1     | -3.7137985 |
| SPATS1     | -1.2968926 |
| SPC25      | -0.5065935 |
| SPDL1      | -2.3864594 |
| SPDYA      | -2.5396538 |
| SPDYB      | -3.2435858 |
| SPECC1     | -0.6803567 |
| SPEER1-PS1 | -4.533758  |

|            |            |
|------------|------------|
| SPEER2     | -4.3065786 |
| SPEER4A    | -4.38488   |
| SPEER4C    | -1.2189326 |
| SPEER4D    | -5.629742  |
| SPEER5-PS1 | -5.0411983 |
| SPEER8-PS1 | -4.112174  |
| SPEER9-PS1 | -6.94818   |
| SPEF1      | -1.3981564 |
| SPEF2      | -0.9235129 |
| SPEM1      | -1.7714264 |
| SPERT      | -3.7295763 |
| SPIB       | -0.8786113 |
| SPIN2D     | -2.6114268 |
| SPINK10    | -0.5807462 |
| SPINK13    | -2.9674654 |
| SPINK2     | -3.8057497 |
| SPINK4     | -4.9334273 |
| SPINK7     | -2.3850229 |
| SPINK8     | -1.8937857 |
| SPINT1     | -4.3679113 |
| SPINT5     | -3.2523398 |
| SPIRE1     | -0.8557282 |
| SPN        | -2.447036  |
| SPNS2      | -1.4931414 |
| SPNS3      | -0.3976147 |
| SPO11      | -3.0573375 |
| SPOCD1     | -2.163884  |
| SPOCK2     | -6.725315  |
| SPON1      | -2.4327345 |
| SPON2      | -4.553386  |
| SPPL2C     | -3.2396038 |
| SPRN       | -1.8851213 |
| SPRR1B     | -3.9031394 |
| SPRR2H     | -6.3857145 |
| SPRR2I     | -2.51367   |
| SPRR4      | -4.0358543 |
| SPRTN      | -2.0570068 |
| SPRY1      | -3.3184278 |
| SPRY2      | -4.0948563 |
| SPRY4      | -2.0196338 |
| SPSB1      | -1.3414757 |
| SPSB4      | -1.9286051 |
| SPTBN1     | -1.4375165 |
| SPTBN4     | -3.433845  |
| SPTBN5     | -3.1313324 |

|            |            |
|------------|------------|
| SPTSSB     | -0.5420165 |
| SRC        | -4.3510017 |
| SRCIN1     | -2.9711378 |
| SRCRB4D    | -1.6201897 |
| SRD5A2     | -2.024191  |
| SRGAP1     | -1.6682329 |
| SRGAP3     | -3.5095313 |
| SRL        | -3.9835486 |
| SRMS       | -1.9096079 |
| SRPK3      | -3.092445  |
| SRPX       | -3.748335  |
| SRRM3      | -2.4837527 |
| SRRM3OS    | -3.9930735 |
| SRRM4OS    | -2.5961857 |
| SRSF12     | -3.3439972 |
| SRY        | -3.7695599 |
| SSC5D      | -4.2427454 |
| SSMEM1     | -2.0230567 |
| SSPN       | -4.0906982 |
| SSPO       | -2.6592948 |
| SSTR1      | -3.7283037 |
| SSTR4      | -0.4694493 |
| SSTR5      | -1.3746507 |
| SSTY1      | -2.7057617 |
| SSU2       | -3.2195518 |
| SSXA1      | -2.917395  |
| SSXB1      | -4.5006223 |
| SSXB10     | -4.7345657 |
| SSXB6      | -2.2385955 |
| SSXB7      | -3.145343  |
| SSXB8      | -2.5703044 |
| SSXB9      | -1.8646796 |
| ST14       | -2.1110053 |
| ST18       | -2.4226274 |
| ST3GAL2    | -2.1683373 |
| ST3GAL6    | -1.1131358 |
| ST6GAL2    | -2.1417356 |
| ST6GALNAC1 | -0.4102223 |
| ST6GALNAC2 | -3.3687406 |
| ST6GALNAC3 | -2.881633  |
| ST8SIA2    | -3.6989713 |
| ST8SIA4    | -3.2024746 |
| ST8SIA6    | -4.3586273 |
| STAC2      | -1.4502697 |
| STAC3      | -0.8329308 |

|         |            |
|---------|------------|
| STARD13 | -1.5751157 |
| STARD6  | -1.6480343 |
| STARD8  | -2.1854725 |
| STAT4   | -2.6830316 |
| STC2    | -4.171197  |
| STEAP3  | -3.039448  |
| STIL    | -2.1798139 |
| STIM2   | -2.0657158 |
| STK32A  | -3.0160444 |
| STK32B  | -12.766645 |
| STK32C  | -4.724153  |
| STK33   | -4.083964  |
| STK36   | -2.9607873 |
| STMN1   | -2.5428116 |
| STMN2   | -6.530366  |
| STMN4   | -4.320526  |
| STMND1  | -4.0416684 |
| STOML3  | -3.395558  |
| STON1   | -2.0740488 |
| STON2   | -1.586901  |
| STOX1   | -1.731684  |
| STOX2   | -1.5057178 |
| STPG1   | -2.444578  |
| STRA8   | -3.0412722 |
| STRC    | -4.8585076 |
| STRIP2  | -1.365156  |
| STRM    | -5.978245  |
| STRN    | -0.7481496 |
| STX19   | -2.8722808 |
| STX1A   | -2.3408682 |
| STX6    | -0.8668933 |
| STXBP4  | -1.3565524 |
| STXBP5L | -2.8555787 |
| STXBP6  | -1.0545695 |
| STYK1   | -1.6726778 |
| STYXL1  | -3.1199965 |
| SUFU    | -1.1524756 |
| SULF1   | -3.0066624 |
| SULF2   | -1.6285105 |
| SULT2A7 | -4.0410204 |
| SULT2B1 | -2.098916  |
| SULT5A1 | -0.4715226 |
| SULT6B1 | -2.3326252 |
| SUN1    | -1.3678596 |
| SUN3    | -2.9507394 |

|          |            |
|----------|------------|
| SUN5     | -1.4909322 |
| SUPT20   | -1.0102897 |
| SUPT3    | -0.8571687 |
| SUSD1    | -3.1932611 |
| SUSD3    | -3.4553752 |
| SUSD4    | -6.050038  |
| SUV39H1  | -1.6108975 |
| SV2C     | -0.6092746 |
| SVAL1    | -3.8051455 |
| SVEP1    | -3.7475886 |
| SVIL     | -0.4725096 |
| SVIP     | -2.4382782 |
| SVOP     | -3.0566115 |
| SVS2     | -2.9879239 |
| SVS3B    | -2.1136672 |
| SVS4     | -2.6842427 |
| SVS5     | -4.0961113 |
| SWAP70   | -1.0169399 |
| SYCE1L   | -3.9562259 |
| SYCN     | -5.529434  |
| SYCP3    | -0.506475  |
| SYDE1    | -1.4925213 |
| SYDE2    | -3.5698895 |
| SYN1     | -2.6459544 |
| SYN2     | -1.3002665 |
| SYN3     | -1.2322447 |
| SYNB     | -0.9384809 |
| SYNDIG1L | -4.237868  |
| SYNE2    | -0.6016958 |
| SYNE3    | -1.9934658 |
| SYNGAP1  | -3.3237727 |
| SYNGR1   | -4.5187783 |
| SYNGR3   | -2.6901264 |
| SYNGR4   | -2.8887713 |
| SYNM     | -3.1550946 |
| SYNPO2   | -2.5858538 |
| SYNPR    | -9.435177  |
| SYT10    | -4.6264324 |
| SYT14    | -4.102703  |
| SYT15    | -3.5984302 |
| SYT16    | -3.298195  |
| SYT17    | -3.4870732 |
| SYT3     | -2.9258437 |
| SYT5     | -3.678722  |
| SYT6     | -1.576241  |



|          |            |
|----------|------------|
| SYT8     | -4.2820654 |
| SYTL1    | -3.0398142 |
| SYTL2    | -3.4657607 |
| SYTL3    | -1.2699203 |
| SYTL4    | -2.8726315 |
| SYTL5    | -2.9986699 |
| TAAR7A   | -3.1522198 |
| TAAR7F   | -4.628046  |
| TAAR8A   | -4.068584  |
| TACO10S  | -3.396057  |
| TACR3    | -2.6839867 |
| TACSTD2  | -4.1768236 |
| TAF7     | -0.3423572 |
| TAF9B    | -1.7268112 |
| TAGLN    | -1.3606689 |
| TAGLN2   | -0.3332069 |
| TAGLN3   | -3.3204124 |
| TAL1     | -1.0505674 |
| TAMM41   | -1.3554637 |
| TANC2    | -2.9476695 |
| TAS1R1   | -2.9188132 |
| TAS1R2   | -3.466458  |
| TAS2R103 | -2.7936747 |
| TAS2R104 | -3.391212  |
| TAS2R106 | -2.5436785 |
| TAS2R110 | -3.7697241 |
| TAS2R118 | -3.2598279 |
| TAS2R120 | -2.5712817 |
| TAS2R121 | -2.6171505 |
| TAS2R124 | -4.382312  |
| TAS2R125 | -2.9353123 |
| TAS2R134 | -4.821127  |
| TAS2R135 | -1.6370659 |
| TAS2R138 | -2.381431  |
| TAS2R139 | -2.9816444 |
| TAS2R140 | -4.986451  |
| TBATA    | -2.0083356 |
| TBC1D10C | -1.1778622 |
| TBC1D12  | -0.6993566 |
| TBC1D21  | -0.7371888 |
| TBC1D22B | -0.9750235 |
| TBC1D30  | -1.7591605 |
| TBC1D31  | -1.5533657 |
| TBCE     | -2.255798  |
| TBL3     | -1.7628524 |

|          |            |
|----------|------------|
| TBR1     | -4.102595  |
| TBX1     | -1.2397983 |
| TBX10    | -2.5065615 |
| TBX15    | -3.47263   |
| TBX2     | -3.9379656 |
| TBX20    | -3.1414225 |
| TBX21    | -1.2347791 |
| TBX3     | -2.0598147 |
| TBX3OS1  | -3.9534879 |
| TBX4     | -7.035715  |
| TBX5     | -6.7039056 |
| TBX6     | -0.9920313 |
| TBXA2R   | -3.570458  |
| TBXAS1   | -0.690105  |
| TC2N     | -4.306422  |
| TCAM1    | -1.3319173 |
| TCAP     | -6.52939   |
| TCEA2    | -2.189115  |
| TCEA3    | -3.2506037 |
| TCEAL3   | -1.9660878 |
| TCEAL6   | -4.4096384 |
| TCEAL7   | -0.7967539 |
| TCEANC   | -3.1630702 |
| TCF15    | -2.2030318 |
| TCF19    | -0.4154716 |
| TCF21    | -3.2643273 |
| TCF23    | -1.8991511 |
| TCF4     | -0.2792046 |
| TCF7     | -1.1877241 |
| TCFL5    | -3.9381747 |
| TCHH     | -2.5786982 |
| TCL1     | -3.1004615 |
| TCL1B3   | -2.8187761 |
| TCL1B4   | -1.8483262 |
| TCL1B5   | -3.8969693 |
| TCP10B   | -0.9201968 |
| TCP10C   | -3.6798525 |
| TCP11    | -5.078473  |
| TCP11L1  | -0.3437021 |
| TCRA     | -2.7354884 |
| TCRB-J   | -1.7094309 |
| TCSTV3   | -2.2831738 |
| TCTE1    | -1.9506028 |
| TCTE2    | -6.127515  |
| TCTEX1D4 | -4.01898   |

|         |            |
|---------|------------|
| TCTN2   | -0.5843651 |
| TDGF1   | -1.270401  |
| TDH     | -1.6344142 |
| TDPOZ4  | -0.8613462 |
| TDRD1   | -3.9660897 |
| TDRD5   | -2.3058457 |
| TEAD2   | -1.1154878 |
| TECPR1  | -0.6595509 |
| TECRL   | -3.4048333 |
| TEK     | -3.6287453 |
| TEKT2   | -4.2351475 |
| TEKT3   | -2.3473516 |
| TEKT4   | -2.6257942 |
| TEKT5   | -3.7466893 |
| TEN1    | -0.4789467 |
| TENM2   | -4.535871  |
| TESC    | -2.1350043 |
| TESCL   | -3.0372927 |
| TESPA1  | -1.8917991 |
| TET1    | -2.4527035 |
| TET3    | -2.2303448 |
| TEX101  | -5.566887  |
| TEX13   | -3.5522082 |
| TEX13A  | -3.4403524 |
| TEX15   | -3.2858129 |
| TEX19.2 | -3.252523  |
| TEX21   | -3.945744  |
| TEX22   | -2.664241  |
| TEX24   | -3.1879241 |
| TEX28   | -1.1410487 |
| TEX33   | -4.711462  |
| TEX36   | -4.7965064 |
| TEX37   | -4.5241976 |
| TEX38   | -3.471029  |
| TEX43   | -3.5143147 |
| TEX9    | -0.5842862 |
| TFAP2A  | -2.6420016 |
| TFAP2C  | -1.6209695 |
| TFAP2D  | -2.272397  |
| TFAP4   | -0.7559767 |
| TFCP2L1 | -1.1829934 |
| TFDP2   | -1.2151985 |
| TFEB    | -1.0323803 |
| TFF2    | -4.2991343 |
| TG      | -4.0635457 |

|          |            |
|----------|------------|
| TGFB1I1  | -2.1577513 |
| TGFB2    | -4.157117  |
| TGFB3    | -2.3253376 |
| TGFBR2   | -0.94012   |
| TGIF2LX1 | -2.3977551 |
| TGIF2LX2 | -3.8704698 |
| TGM4     | -3.4471965 |
| TGM6     | -0.547292  |
| TGM7     | -5.180376  |
| TH       | -1.3427143 |
| THADA    | -1.6137428 |
| THBD     | -2.5943391 |
| THBS3    | -4.320559  |
| THEG     | -3.276219  |
| THEM5    | -1.0286379 |
| THEM6    | -1.6413884 |
| THEMIS   | -3.7170396 |
| THEMIS3  | -2.8544428 |
| THNSL1   | -2.3887196 |
| THRA     | -1.4139965 |
| THSD4    | -3.0478551 |
| THSD7A   | -1.4328642 |
| THY1     | -1.3589356 |
| TIA1     | -9.097546  |
| TIAM1    | -1.9779589 |
| TIAM2    | -3.2307267 |
| TIE1     | -2.7057319 |
| TIMM8A2  | -1.5700557 |
| TIMP2    | -4.2380104 |
| TIMP3    | -1.088505  |
| TIMP4    | -2.4325335 |
| TINAG    | -5.486599  |
| TK1      | -0.5452402 |
| TKTL2    | -2.921944  |
| TLCD2    | -0.5759285 |
| TLE2     | -1.5451112 |
| TLE6     | -0.9530118 |
| TLL1     | -2.3532932 |
| TLR11    | -3.9785774 |
| TLR12    | -0.7442615 |
| TLR4     | -0.5360222 |
| TLR5     | -1.3554497 |
| TLR8     | -2.2274761 |
| TLX1     | -2.5120635 |
| TLX3     | -2.8902955 |

|          |            |
|----------|------------|
| TM4SF1   | -0.4026582 |
| TMC1     | -3.286765  |
| TMC2     | -4.037284  |
| TMC3     | -0.6214327 |
| TMC4     | -3.4338787 |
| TMC5     | -1.8100653 |
| TMCC2    | -3.1717405 |
| TMCC3    | -0.7155826 |
| TMCO5B   | -3.0807672 |
| TMED11   | -3.1859696 |
| TMEFF1   | -4.904261  |
| TMEFF2   | -2.8461826 |
| TMEM100  | -6.1728454 |
| TMEM106A | -1.0073183 |
| TMEM108  | -1.6611218 |
| TMEM109  | -0.5576866 |
| TMEM116  | -3.7588105 |
| TMEM130  | -2.4793918 |
| TMEM132A | -2.1410532 |
| TMEM132B | -2.407659  |
| TMEM132C | -4.309862  |
| TMEM139  | -3.0115368 |
| TMEM14A  | -1.5454082 |
| TMEM150B | -2.5488274 |
| TMEM150C | -3.755563  |
| TMEM151A | -1.3748469 |
| TMEM154  | -2.2059712 |
| TMEM156  | -2.251002  |
| TMEM159  | -1.4058218 |
| TMEM163  | -3.5300276 |
| TMEM168  | -1.179009  |
| TMEM169  | -3.083553  |
| TMEM178  | -1.6546583 |
| TMEM179  | -4.0630193 |
| TMEM182  | -5.5614953 |
| TMEM190  | -4.392329  |
| TMEM191C | -2.9547756 |
| TMEM194B | -1.2412109 |
| TMEM196  | -2.4919162 |
| TMEM198  | -1.0755575 |
| TMEM200A | -3.1534262 |
| TMEM200B | -2.1549673 |
| TMEM201  | -0.400522  |
| TMEM204  | -2.9863787 |
| TMEM209  | -0.6269941 |

|           |            |
|-----------|------------|
| TMEM210   | -3.6397696 |
| TMEM212   | -6.1219907 |
| TMEM213   | -5.107068  |
| TMEM217   | -2.166665  |
| TMEM218   | -3.1171017 |
| TMEM221   | -5.153451  |
| TMEM229A  | -3.354199  |
| TMEM231   | -2.6547763 |
| TMEM232   | -4.167933  |
| TMEM233   | -2.2606697 |
| TMEM240   | -2.490191  |
| TMEM241   | -0.6592839 |
| TMEM245   | -0.4545128 |
| TMEM246   | -2.73997   |
| TMEM247   | -3.0446541 |
| TMEM253   | -2.629585  |
| TMEM28    | -1.2616454 |
| TMEM29    | -0.9507554 |
| TMEM35    | -4.481719  |
| TMEM38A   | -0.9129152 |
| TMEM40    | -2.6192496 |
| TMEM44    | -4.832139  |
| TMEM45A   | -0.6655533 |
| TMEM45B   | -2.547217  |
| TMEM47    | -1.4541576 |
| TMEM50B   | -1.8273518 |
| TMEM51OS1 | -1.4827702 |
| TMEM52    | -3.1698146 |
| TMEM54    | -1.7560086 |
| TMEM59L   | -3.864753  |
| TMEM61    | -1.5082695 |
| TMEM63C   | -0.8898068 |
| TMEM65    | -1.2918396 |
| TMEM71    | -1.1393061 |
| TMEM72    | -3.0215037 |
| TMEM74    | -3.7236152 |
| TMEM79    | -2.626296  |
| TMEM81    | -1.1732771 |
| TMEM87A   | -0.7785122 |
| TMEM88    | -0.5304139 |
| TMEM8B    | -1.3625549 |
| TMEM91    | -1.0715299 |
| TMEM95    | -4.5931044 |
| TMOD1     | -4.321226  |
| TMOD2     | -1.8902701 |

|            |            |
|------------|------------|
| TMPRSS11D  | -0.9762621 |
| TMPRSS11G  | -2.1556087 |
| TMPRSS12   | -3.6227987 |
| TMPRSS13   | -4.5873275 |
| TMPRSS4    | -1.1116412 |
| TMPRSS9    | -3.0121975 |
| TMSB10     | -0.6368911 |
| TMSB15B1   | -1.341984  |
| TMTC1      | -3.9197397 |
| TNC        | -3.031901  |
| TNFAIP8L2  | -0.69473   |
| TNFAIP8L3  | -1.5197875 |
| TNFRSF13B  | -1.2974079 |
| TNFRSF13C  | -0.4352171 |
| TNFRSF14   | -0.8171871 |
| TNFRSF17   | -2.5286095 |
| TNFRSF19   | -5.0804396 |
| TNFRSF8    | -3.7446663 |
| TNFSF10    | -2.369244  |
| TNFSF12TNF | -1.0638685 |
| TNFSF13B   | -1.4675915 |
| TNFSF13OS  | -0.8922007 |
| TNFSF14    | -0.8164563 |
| TNFSF15    | -0.6589294 |
| TNFSF18    | -3.0611804 |
| TNFSF8     | -2.5218117 |
| TNIK       | -2.3248339 |
| TNK1       | -3.583297  |
| TNK2OS     | -5.440377  |
| TNN        | -1.0659726 |
| TNNC1      | -2.2849672 |
| TNNC2      | -4.0210266 |
| TNNI2      | -2.3659263 |
| TNNI3      | -6.2982483 |
| TNNT2      | -6.7983227 |
| TNNT3      | -3.183682  |
| TNR        | -3.2343245 |
| TNRC6C     | -0.471823  |
| TNS1       | -1.2461479 |
| TNS3       | -1.0387456 |
| TNS4       | -0.747186  |
| TNXB       | -2.6304247 |
| TONSL      | -1.9782677 |
| TOR4A      | -0.7530437 |
| TOX3       | -4.443698  |

|           |            |
|-----------|------------|
| TPBPB     | -2.2789545 |
| TPCN1     | -0.4677274 |
| TPGS2     | -2.2944083 |
| TPH2      | -2.7275755 |
| TPM1      | -0.5544117 |
| TPM2      | -3.741347  |
| TPPP      | -2.9322548 |
| TPPP2     | -2.8184426 |
| TPPP3     | -4.688527  |
| TPSG1     | -3.6133206 |
| TPTE      | -3.2907543 |
| TPX2      | -1.3073289 |
| TRABD2B   | -4.4742413 |
| TRAF3IP1  | -2.7499242 |
| TRAF3IP2  | -1.4745486 |
| TRAF3IP3  | -1.3636887 |
| TRAF5     | -0.746367  |
| TRAIP     | -3.6048243 |
| TRAM1L1   | -3.491109  |
| TRANK1    | -0.751142  |
| TRAPPC9   | -0.4495604 |
| TRAV14N-1 | -4.869783  |
| TRAV3N-3  | -1.842303  |
| TRAV9D-3  | -1.9887018 |
| TRAV9N-2  | -2.4522145 |
| TRCG1     | -1.8301423 |
| TRDN      | -2.5149186 |
| TREML1    | -2.0215437 |
| TREML2    | -2.4029458 |
| TRERF1    | -2.8130658 |
| TRGV2     | -3.9241002 |
| TRH       | -1.7835464 |
| TRIL      | -3.0700862 |
| TRIM10    | -2.4524822 |
| TRIM15    | -4.6711283 |
| TRIM16    | -4.6472893 |
| TRIM17    | -2.315197  |
| TRIM29    | -1.434689  |
| TRIM30C   | -0.6717253 |
| TRIM31    | -2.3103127 |
| TRIM35    | -0.5672972 |
| TRIM36    | -3.2776108 |
| TRIM37    | -0.5311685 |
| TRIM40    | -1.6766787 |
| TRIM42    | -4.9904017 |



|          |            |
|----------|------------|
| TRIM45   | -2.6692355 |
| TRIM50   | -3.6037784 |
| TRIM54   | -4.340719  |
| TRIM55   | -5.5671935 |
| TRIM58   | -2.569449  |
| TRIM59   | -2.0731008 |
| TRIM61   | -5.0943336 |
| TRIM62   | -1.6761124 |
| TRIM63   | -0.8855443 |
| TRIM66   | -2.8803105 |
| TRIM69   | -3.5367677 |
| TRIM7    | -2.384532  |
| TRIM71   | -4.497436  |
| TRIM72   | -0.4857097 |
| TRIML1   | -3.554546  |
| TRIML2   | -3.9224443 |
| TRIQK    | -1.674638  |
| TRMT12   | -0.4686177 |
| TRNP1    | -3.2747996 |
| TROAP    | -3.801333  |
| TROVE2   | -2.2005148 |
| TRP53I11 | -0.6304567 |
| TRP53I13 | -1.9247305 |
| TRP53TG5 | -5.00277   |
| TRP73    | -2.567246  |
| TRPC3    | -3.0367723 |
| TRPC4    | -2.3963933 |
| TRPC5    | -3.313726  |
| TRPC6    | -4.857053  |
| TRPM1    | -1.6903532 |
| TRPM4    | -1.064929  |
| TRPM6    | -3.36356   |
| TRPM8    | -2.6535547 |
| TRPS1    | -1.7008939 |
| TRPT1    | -0.9520159 |
| TRPV1    | -0.9469024 |
| TRPV3    | -2.8819091 |
| TRPV4    | -1.273982  |
| TRPV6    | -3.20908   |
| TRY5     | -3.5438466 |
| TSC2     | -3.5308678 |
| TSC22D1  | -2.438615  |
| TSC22D3  | -1.7990358 |
| TSEN34   | -0.2682779 |
| TSGA10IP | -0.4256024 |

|         |            |
|---------|------------|
| TSGA8   | -1.3999333 |
| TSHB    | -4.761922  |
| TSHZ1   | -0.3007324 |
| TSHZ3   | -1.8545234 |
| TSKS    | -2.7100735 |
| TSLP    | -3.2636483 |
| TSPAN1  | -7.816577  |
| TSPAN11 | -3.7916427 |
| TSPAN13 | -4.5163097 |
| TSPAN17 | -1.9954023 |
| TSPAN18 | -4.542587  |
| TSPAN2  | -6.0865946 |
| TSPAN3  | -0.8087084 |
| TSPAN32 | -5.9005337 |
| TSPAN5  | -2.8703363 |
| TSPAN6  | -1.351969  |
| TSPAN7  | -1.687372  |
| TSPAN8  | -6.778787  |
| TSPYL3  | -1.3361897 |
| TSPYL4  | -1.4961829 |
| TSPYL5  | -2.053146  |
| TSR2    | -0.5714369 |
| TSSK1   | -3.9669566 |
| TSSK3   | -2.7185571 |
| TSSK5   | -1.9241946 |
| TSSK6   | -2.9428658 |
| TSX     | -2.4848316 |
| TTBK1   | -1.5289471 |
| TTC12   | -2.056309  |
| TTC16   | -1.8652506 |
| TTC18   | -3.902323  |
| TTC21A  | -3.49305   |
| TTC22   | -3.6328893 |
| TTC23L  | -3.2282963 |
| TTC25   | -4.365963  |
| TTC26   | -2.7348542 |
| TTC28   | -2.7789738 |
| TTC29   | -4.681655  |
| TTC30A2 | -1.2940116 |
| TTC30B  | -0.753031  |
| TTC34   | -2.1755219 |
| TTC39D  | -4.3496866 |
| TTC8    | -0.9853687 |
| TTC9    | -4.247641  |
| TTL     | -0.3376248 |

|          |            |
|----------|------------|
| TTLL1    | -0.8526998 |
| TTLL13   | -3.5773873 |
| TTLL2    | -1.6179947 |
| TTLL3    | -0.8914361 |
| TTLL5    | -1.5341976 |
| TTLL6    | -2.5610373 |
| TTLL7    | -1.548908  |
| TTLL8    | -1.0705409 |
| TTLL9    | -3.8782256 |
| TTN      | -6.2279234 |
| TTYH3    | -1.7275648 |
| TUBA1A   | -2.3962348 |
| TUBA3A   | -2.447836  |
| TUBA3B   | -3.2024229 |
| TUBAL3   | -1.5092683 |
| TUBB1    | -4.1917677 |
| TUBB2B   | -2.7850125 |
| TUBB3    | -1.08308   |
| TUBG2    | -1.4899297 |
| TULP2    | -2.4667873 |
| TUSC5    | -3.4871662 |
| TVP23A   | -1.638469  |
| TWF2     | -0.4562042 |
| TWIST2   | -1.9762521 |
| TXLNB    | -2.5869262 |
| TXLNG    | -0.9144454 |
| TXNDC16  | -1.8577886 |
| TXNDC2   | -1.9439862 |
| TYK2     | -0.7879727 |
| TYMS     | -1.1866236 |
| TYR      | -2.8118348 |
| TYRO3    | -1.7825713 |
| TYW3     | -2.5290012 |
| U90926   | -1.4449759 |
| UBASH3A  | -2.9608757 |
| UBE2C    | -0.707377  |
| UBE2DNL1 | -3.5324414 |
| UBE2U    | -1.58427   |
| UBL4B    | -3.5717354 |
| UBL7     | -0.5586317 |
| UBQLN4   | -0.3847728 |
| UBQLNL   | -3.315335  |
| UBXN10   | -5.364608  |
| UBXN11   | -1.1447408 |
| UCHL3    | -0.6457787 |

|          |            |
|----------|------------|
| UCMA     | -2.7978494 |
| UCN2     | -0.9914675 |
| UCP1     | -2.8854272 |
| UCP3     | -0.3889921 |
| UFSP1    | -1.0846086 |
| UGT8A    | -2.795095  |
| UHRF1    | -0.7110529 |
| UIMC1    | -1.3557544 |
| ULBP1    | -2.6435194 |
| ULK4     | -4.1815743 |
| UNC119   | -0.2624071 |
| UNC13A   | -2.8729718 |
| UNC13D   | -1.3264163 |
| UNC45B   | -1.8516855 |
| UNC45BOS | -2.6190066 |
| UNC5A    | -1.7393451 |
| UNC5B    | -0.6771619 |
| UNC5C    | -3.3521962 |
| UNC5D    | -12.737003 |
| UNC79    | -2.9110348 |
| UNC80    | -2.9477184 |
| UNCX     | -2.2584295 |
| UPK1A    | -1.4688616 |
| UPK1B    | -3.4380846 |
| UPK2     | -3.9516106 |
| UPK3A    | -4.561471  |
| UPK3BL   | -2.4892287 |
| USH1C    | -3.5144212 |
| USH1G    | -2.1397414 |
| USHBP1   | -3.4473503 |
| USP11    | -1.6306896 |
| USP13    | -2.998117  |
| USP17LE  | -2.1331193 |
| USP27X   | -3.0317154 |
| USP35    | -2.4593804 |
| USP37    | -2.2627687 |
| USP44    | -3.9634204 |
| USP46    | -0.8710907 |
| USP51    | -1.8159254 |
| USP54    | -1.7479582 |
| USP8     | -1.3828866 |
| USP9Y    | -3.5795913 |
| UTP14B   | -2.7630002 |
| UTRN     | -0.98791   |
| UTS2     | -2.5710943 |

|            |            |
|------------|------------|
| UTS2R      | -0.5262229 |
| UTY        | -2.4164488 |
| UVSSA      | -3.6701512 |
| V1RA8      | -3.5164292 |
| VAC14      | -0.5471766 |
| VAMP3      | -0.9426298 |
| VANGL2     | -0.5931861 |
| VARS2      | -1.3497705 |
| VASH2      | -3.2824342 |
| VAV3       | -2.0070257 |
| VAX1       | -3.8143117 |
| VAX2OS     | -1.8910131 |
| VDR        | -1.0806425 |
| VEGFA      | -0.4799287 |
| VEPH1      | -4.911352  |
| VEZF1      | -0.590481  |
| VEZT       | -1.9917471 |
| VGLL1      | -2.5146308 |
| VGLL2      | -4.7385993 |
| VGLL3      | -3.4013655 |
| VIP        | -4.3712053 |
| VIPR2      | -4.126794  |
| VLDLR      | -0.7086194 |
| VMAC       | -0.4736981 |
| VMN1R1     | -3.2027745 |
| VMN1R131   | -2.403607  |
| VMN1R132   | -4.0905914 |
| VMN1R139   | -2.1853285 |
| VMN1R148   | -3.6579432 |
| VMN1R157   | -3.8555784 |
| VMN1R168   | -2.4686894 |
| VMN1R17    | -2.1019166 |
| VMN1R171   | -2.9119177 |
| VMN1R172   | -4.1395783 |
| VMN1R185   | -3.3058865 |
| VMN1R199   | -4.0970182 |
| VMN1R2     | -3.10776   |
| VMN1R20    | -4.040592  |
| VMN1R202   | -3.1817932 |
| VMN1R204   | -1.1868749 |
| VMN1R207-F | -2.9330928 |
| VMN1R210   | -2.4696271 |
| VMN1R214   | -2.5045881 |
| VMN1R216   | -2.4547198 |
| VMN1R223   | -3.0216622 |

|          |            |
|----------|------------|
| VMN1R224 | -2.9580534 |
| VMN1R225 | -2.5213475 |
| VMN1R227 | -4.1618495 |
| VMN1R230 | -4.3462806 |
| VMN1R235 | -3.2656622 |
| VMN1R24  | -3.639029  |
| VMN1R28  | -3.412644  |
| VMN1R32  | -2.6617124 |
| VMN1R33  | -3.3675725 |
| VMN1R34  | -5.3423214 |
| VMN1R39  | -3.228328  |
| VMN1R41  | -2.9645388 |
| VMN1R42  | -4.783785  |
| VMN1R47  | -5.726698  |
| VMN1R56  | -1.2968369 |
| VMN1R58  | -2.2098718 |
| VMN1R6   | -3.2682197 |
| VMN1R62  | -1.2486475 |
| VMN1R63  | -2.9856515 |
| VMN1R64  | -2.55702   |
| VMN1R66  | -5.5610447 |
| VMN1R67  | -4.81763   |
| VMN1R70  | -0.318398  |
| VMN1R72  | -2.2809489 |
| VMN1R74  | -3.3398201 |
| VMN1R75  | -4.810191  |
| VMN1R81  | -2.5102274 |
| VMN1R84  | -4.4415426 |
| VMN1R86  | -4.4074993 |
| VMN2R102 | -2.2760882 |
| VMN2R103 | -2.575473  |
| VMN2R104 | -3.0719671 |
| VMN2R107 | -2.921341  |
| VMN2R11  | -1.0774329 |
| VMN2R111 | -3.1409163 |
| VMN2R114 | -3.0295033 |
| VMN2R115 | -2.614244  |
| VMN2R118 | -5.642839  |
| VMN2R12  | -2.701505  |
| VMN2R120 | -2.263959  |
| VMN2R121 | -3.1582766 |
| VMN2R13  | -2.3215332 |
| VMN2R27  | -1.4820182 |
| VMN2R3   | -2.6550958 |
| VMN2R35  | -2.6836643 |

|            |            |
|------------|------------|
| VMN2R39    | -3.946389  |
| VMN2R48    | -3.8072205 |
| VMN2R54    | -2.9387095 |
| VMN2R55    | -3.0162926 |
| VMN2R58    | -3.2071602 |
| VMN2R60    | -6.6441097 |
| VMN2R62    | -5.114252  |
| VMN2R67    | -2.8606606 |
| VMN2R7     | -3.0496182 |
| VMN2R71    | -3.2922869 |
| VMN2R72    | -3.40945   |
| VMN2R73    | -3.408082  |
| VMN2R77    | -5.4496603 |
| VMN2R80    | -4.735147  |
| VMN2R82    | -3.367467  |
| VMN2R83    | -3.1862578 |
| VMN2R85    | -3.675939  |
| VMN2R91    | -3.3908129 |
| VMN2R98    | -2.1524482 |
| VMN2R-PS1C | -2.7098935 |
| VMN2R-PS12 | -5.187035  |
| VMN2R-PS54 | -2.1653178 |
| VMN2R-PS57 | -2.7352874 |
| VMO1       | -0.4789109 |
| VPREB1     | -4.2377915 |
| VPREB2     | -6.52313   |
| VPREB3     | -4.358542  |
| VPS51      | -0.7542527 |
| VPS72      | -2.6160483 |
| VSIG10L    | -2.9155078 |
| VSIG2      | -2.402823  |
| VSIG8      | -2.8142445 |
| VSTM2A     | -2.7845945 |
| VSTM2L     | -5.2370443 |
| VSTM4      | -3.2058656 |
| VSTM5      | -3.0294106 |
| VSX2       | -3.1936827 |
| VWA1       | -3.4003093 |
| VWA3A      | -3.9312162 |
| VWA5B1     | -2.6132996 |
| VWA5B2     | -1.3348966 |
| VWC2       | -1.2050395 |
| VWDE       | -2.5294416 |
| WAP        | -2.3173442 |
| WASF3      | -1.9052849 |

|         |            |
|---------|------------|
| WBSCR17 | -2.754386  |
| WBSCR25 | -3.808164  |
| WBSCR28 | -2.3004677 |
| WDFY1   | -0.4353735 |
| WDFY4   | -1.0742104 |
| WDPCP   | -0.3714979 |
| WDR16   | -4.879611  |
| WDR20RT | -1.9572811 |
| WDR25   | -0.5142906 |
| WDR27   | -4.1904726 |
| WDR49   | -3.9215133 |
| WDR52   | -2.9569802 |
| WDR5B   | -1.6613374 |
| WDR62   | -2.2595248 |
| WDR63   | -1.8957858 |
| WDR64   | -3.0109963 |
| WDR65   | -5.300933  |
| WDR7    | -1.0367951 |
| WDR70   | -3.4077299 |
| WDR76   | -1.9134011 |
| WDR78   | -2.639937  |
| WDR86   | -5.2997975 |
| WDR93   | -3.2718763 |
| WDR95   | -2.358838  |
| WDR96   | -3.8317215 |
| WFDC1   | -4.2347546 |
| WFDC10  | -5.1781693 |
| WFDC11  | -3.4152875 |
| WFDC12  | -2.466326  |
| WFDC15A | -6.0737505 |
| WFDC15B | -2.096847  |
| WFDC16  | -3.6197352 |
| WFDC2   | -3.6219156 |
| WFDC3   | -1.221601  |
| WFDC6A  | -2.4303002 |
| WFDC6B  | -2.3472772 |
| WFDC8   | -3.3894088 |
| WHRN    | -1.9288077 |
| WIBG    | -2.6743608 |
| WIF1    | -6.347686  |
| WIPF1   | -0.9217072 |
| WIPF3   | -1.8650067 |
| WISP1   | -0.8567154 |
| WISP2   | -1.21558   |
| WISP3   | -6.534381  |



|          |            |
|----------|------------|
| WLS      | -2.790699  |
| WNK2     | -2.2312777 |
| WNK4     | -5.549991  |
| WNT1     | -1.3467791 |
| WNT10B   | -4.454863  |
| WNT11    | -2.106145  |
| WNT16    | -2.6815758 |
| WNT2     | -3.4082952 |
| WNT2B    | -2.7390244 |
| WNT4     | -2.2974489 |
| WNT5A    | -1.0178676 |
| WNT6     | -1.510262  |
| WNT7A    | -4.217417  |
| WNT8B    | -2.8582294 |
| WNT9A    | -1.138768  |
| WNT9B    | -1.6592138 |
| WSCD1    | -3.830307  |
| WSCD2    | -3.0673628 |
| WTIP     | -0.2950962 |
| WWC1     | -0.8743804 |
| WWC2     | -0.9681933 |
| WWP1     | -0.9340365 |
| WWTR1    | -0.8172915 |
| XCR1     | -3.014581  |
| XIRP1    | -1.9020681 |
| XK       | -2.8969772 |
| XKR4     | -3.1320682 |
| XKR7     | -2.1201558 |
| XKRX     | -1.7450242 |
| XLR5B    | -1.6291981 |
| XNDC1    | -0.8237398 |
| XPNPEP2  | -4.033189  |
| XPO7     | -0.8025494 |
| XRCC1    | -0.7785389 |
| XRCC6BP1 | -4.888009  |
| XXYLT1   | -0.7352562 |
| XYLT1    | -3.0629923 |
| YBEY     | -1.6397138 |
| YBX2     | -2.7742167 |
| YDJC     | -1.2404203 |
| YIPF7    | -2.1851552 |
| YLPM1    | -1.6937163 |
| YPEL1    | -1.9822514 |
| YPEL4    | -1.648381  |
| ZAN      | -3.8635092 |

|          |            |
|----------|------------|
| ZAR1     | -3.6812088 |
| ZBBX     | -4.6490965 |
| ZBTB21   | -0.3900459 |
| ZBTB3    | -0.7650125 |
| ZBTB32   | -1.1797402 |
| ZBTB38   | -1.0209899 |
| ZBTB4    | -0.6389973 |
| ZBTB44   | -0.6773069 |
| ZBTB46   | -0.7838028 |
| ZBTB7C   | -3.9430833 |
| ZBTB8A   | -0.8955774 |
| ZBTBD6   | -2.1839254 |
| ZC2HC1A  | -1.7441356 |
| ZC2HC1B  | -3.5367408 |
| ZC3H6    | -1.3775365 |
| ZC3H8    | -1.6520402 |
| ZC3HAV1L | -3.1486146 |
| ZC4H2    | -3.5276606 |
| ZCCHC12  | -3.6390922 |
| ZCCHC13  | -3.7129517 |
| ZCCHC16  | -3.7336512 |
| ZCCHC18  | -4.5410542 |
| ZCCHC5   | -3.8105004 |
| ZCWPW2   | -3.1882792 |
| ZDHHC1   | -2.001879  |
| ZDHHC14  | -0.8676951 |
| ZDHHC15  | -3.7671108 |
| ZDHHC22  | -0.9958885 |
| ZDHHC23  | -0.6233151 |
| ZDHHC25  | -4.434542  |
| ZDHHC8   | -1.8053186 |
| ZEB2     | -0.5562103 |
| ZEB2OS   | -2.2854283 |
| ZFHX2OS  | -2.0818276 |
| ZFHX3    | -1.0491874 |
| ZFP108   | -1.5628726 |
| ZFP11    | -3.1393027 |
| ZFP114   | -2.6322417 |
| ZFP119A  | -1.6730728 |
| ZFP12    | -1.9396985 |
| ZFP142   | -1.8586662 |
| ZFP160   | -3.5777473 |
| ZFP185   | -3.5955832 |
| ZFP235   | -1.7307384 |
| ZFP251   | -0.6830943 |

|         |            |
|---------|------------|
| ZFP273  | -1.10379   |
| ZFP28   | -1.2115599 |
| ZFP287  | -2.1980894 |
| ZFP296  | -1.7943287 |
| ZFP300  | -4.0700617 |
| ZFP329  | -0.7610402 |
| ZFP345  | -2.6103315 |
| ZFP352  | -1.483702  |
| ZFP354B | -1.703098  |
| ZFP354C | -4.537517  |
| ZFP362  | -1.1085839 |
| ZFP365  | -4.882284  |
| ZFP366  | -3.1011167 |
| ZFP36L3 | -1.6792889 |
| ZFP37   | -3.7268186 |
| ZFP382  | -1.7408142 |
| ZFP385A | -0.6542666 |
| ZFP385C | -4.05513   |
| ZFP389  | -1.9648137 |
| ZFP398  | -0.7391422 |
| ZFP42   | -3.7472472 |
| ZFP420  | -1.4618149 |
| ZFP428  | -2.2073565 |
| ZFP438  | -2.3946817 |
| ZFP444  | -3.1768448 |
| ZFP454  | -3.3659575 |
| ZFP455  | -2.0750391 |
| ZFP46   | -0.3680713 |
| ZFP462  | -1.9403561 |
| ZFP467  | -1.2319391 |
| ZFP473  | -1.7402129 |
| ZFP474  | -5.1285257 |
| ZFP503  | -2.2824397 |
| ZFP516  | -1.4228618 |
| ZFP521  | -3.222133  |
| ZFP526  | -2.5462751 |
| ZFP536  | -2.1686249 |
| ZFP551  | -2.427208  |
| ZFP560  | -1.3063014 |
| ZFP563  | -3.7105083 |
| ZFP57   | -1.2895739 |
| ZFP575  | -1.3209949 |
| ZFP580  | -1.508934  |
| ZFP583  | -1.5129659 |
| ZFP595  | -0.5909121 |

|          |            |
|----------|------------|
| ZFP599   | -0.4956908 |
| ZFP60    | -1.7317393 |
| ZFP605   | -1.2786057 |
| ZFP608   | -1.1271198 |
| ZFP609   | -1.9911087 |
| ZFP61    | -2.29322   |
| ZFP616   | -3.433096  |
| ZFP619   | -0.7682836 |
| ZFP641   | -1.148474  |
| ZFP65    | -0.8066876 |
| ZFP652OS | -1.2439268 |
| ZFP667   | -1.3791945 |
| ZFP697   | -1.8165965 |
| ZFP703   | -0.5892341 |
| ZFP704   | -0.9639103 |
| ZFP711   | -3.8847344 |
| ZFP72    | -1.0274785 |
| ZFP735   | -2.8717296 |
| ZFP74    | -0.9106307 |
| ZFP759   | -3.1296372 |
| ZFP773   | -0.9247267 |
| ZFP78    | -1.4211795 |
| ZFP781   | -0.9075649 |
| ZFP783   | -1.096457  |
| ZFP786   | -4.941637  |
| ZFP808   | -6.493881  |
| ZFP82    | -0.9895134 |
| ZFP821   | -0.5734546 |
| ZFP827   | -3.2555466 |
| ZFP84    | -0.6384289 |
| ZFP846   | -0.4473941 |
| ZFP85    | -2.5442913 |
| ZFP850   | -2.3122048 |
| ZFP870   | -2.6589987 |
| ZFP873   | -1.1712279 |
| ZFP874A  | -2.0698833 |
| ZFP874B  | -0.8933106 |
| ZFP879   | -3.9241157 |
| ZFP882   | -0.8814774 |
| ZFP92    | -1.217481  |
| ZFP933   | -1.7406826 |
| ZFP934   | -2.4736197 |
| ZFP936   | -0.2727432 |
| ZFP939   | -4.373227  |
| ZFP94    | -3.6768115 |

|          |            |
|----------|------------|
| ZFP948   | -0.3792768 |
| ZFP950   | -1.5109725 |
| ZFP951   | -2.2202823 |
| ZFP952   | -1.1158454 |
| ZFP957   | -1.7517321 |
| ZFP958   | -1.2407491 |
| ZFR2     | -3.631048  |
| ZFY2     | -3.4726534 |
| ZFYVE28  | -5.226798  |
| ZG16     | -2.7983346 |
| ZGPAT    | -0.4182117 |
| ZGRF1    | -3.8462493 |
| ZIC1     | -1.7187409 |
| ZIC2     | -2.3659966 |
| ZIC3     | -3.260188  |
| ZIC4     | -5.2571564 |
| ZIC5     | -3.130684  |
| ZKSCAN2  | -3.0120766 |
| ZKSCAN4  | -3.3320096 |
| ZMAT4    | -3.3971593 |
| ZMIZ1OS1 | -1.8009796 |
| ZMYND10  | -6.3471    |
| ZMYND12  | -1.8240132 |
| ZNRF3    | -1.2096367 |
| ZNRF4    | -5.565144  |
| ZP1      | -1.4697917 |
| ZP3      | -3.4439802 |
| ZP3R     | -3.8843722 |
| ZPBP     | -2.3664887 |
| ZPBP2    | -2.579691  |
| ZRANB3   | -1.2584136 |
| ZRSR2    | -1.7735922 |
| ZSCAN10  | -3.130966  |
| ZSCAN18  | -1.0076993 |
| ZSCAN2   | -2.2509542 |
| ZSCAN30  | -4.3493795 |
| ZSCAN4B  | -0.9857552 |
| ZSCAN5B  | -1.7977021 |
| ZWILCH   | -1.0778296 |
| AAAS     | 1.7641504  |
| AACS     | 1.8990085  |
| AADAC    | 10.198011  |
| AAED1    | 1.4622843  |
| AAGAB    | 2.39801    |
| AAK1     | 0.77402806 |

|          |            |
|----------|------------|
| AAMP     | 1.2547529  |
| AAR2     | 1.5375035  |
| AARS     | 3.495485   |
| AARSD1   | 1.3139474  |
| AASDH    | 0.3792956  |
| AASDHPPT | 1.546778   |
| AASS     | 5.6108685  |
| AATF     | 2.1778986  |
| ABAT     | 3.8640125  |
| ABCA1    | 4.8437576  |
| ABCA6    | 4.3265038  |
| ABCA8B   | 3.615278   |
| ABCB10   | 1.364672   |
| ABCB11   | 7.224962   |
| ABCB1B   | 1.6047218  |
| ABCB4    | 4.070616   |
| ABCB7    | 1.3404949  |
| ABCB8    | 2.1255853  |
| ABCC1    | 1.2767465  |
| ABCC10   | 1.6545727  |
| ABCC2    | 7.929564   |
| ABCC3    | 4.159813   |
| ABCC4    | 1.1833179  |
| ABCC6    | 8.091809   |
| ABCC9    | 1.2300956  |
| ABCD3    | 2.03247    |
| ABCD4    | 0.77493215 |
| ABCE1    | 2.3756902  |
| ABCF1    | 2.0834644  |
| ABCF2    | 1.3196533  |
| ABCF3    | 2.7914655  |
| ABCG2    | 1.9630964  |
| ABCG5    | 7.703603   |
| ABCG8    | 1.0769417  |
| ABHD1    | 0.9519136  |
| ABHD10   | 0.9661555  |
| ABHD11   | 2.0600913  |
| ABHD13   | 1.0291793  |
| ABHD14B  | 1.0001757  |
| ABHD15   | 3.0421598  |
| ABHD16A  | 0.3363006  |
| ABHD17A  | 0.6169274  |
| ABHD17B  | 1.209274   |
| ABHD17C  | 1.7721694  |
| ABHD2    | 1.5192871  |

|        |            |
|--------|------------|
| ABHD3  | 1.9793196  |
| ABHD4  | 1.6006396  |
| ABHD5  | 1.4631298  |
| ABHD6  | 1.3915985  |
| ABI1   | 0.901994   |
| ABI2   | 0.7630284  |
| ABL1   | 0.69958425 |
| ABL2   | 1.2614892  |
| ABRACL | 1.5223868  |
| ABTB1  | 1.1409166  |
| ABTB2  | 2.2452023  |
| ACAA1A | 3.1302335  |
| ACAA1B | 3.0791657  |
| ACAA2  | 2.3690956  |
| ACACA  | 0.93778014 |
| ACACB  | 1.0767591  |
| ACAD10 | 2.1748717  |
| ACAD11 | 3.8962796  |
| ACAD9  | 2.229993   |
| ACADL  | 3.8105357  |
| ACADM  | 2.5544913  |
| ACADS  | 2.4094675  |
| ACADSB | 1.1192238  |
| ACADVL | 3.9285157  |
| ACAP2  | 0.26970935 |
| ACAT1  | 2.0846307  |
| ACAT2  | 5.4466114  |
| ACAT3  | 5.7748127  |
| ACBD3  | 1.9903939  |
| ACBD4  | 1.4162738  |
| ACBD5  | 0.52333426 |
| ACBD6  | 2.0983827  |
| ACCS   | 1.3908291  |
| ACCSL  | 2.5624847  |
| ACD    | 1.505274   |
| ACER3  | 1.4231842  |
| ACIN1  | 0.91528106 |
| ACKR1  | 6.9204454  |
| ACLY   | 0.5935514  |
| ACMSD  | 1.3799577  |
| ACN9   | 1.6250331  |
| ACNAT1 | 3.366413   |
| ACNAT2 | 3.787193   |
| ACO2   | 2.07429    |
| ACOT1  | 0.6750891  |

|        |            |
|--------|------------|
| ACOT12 | 3.4889858  |
| ACOT13 | 1.1595023  |
| ACOT2  | 1.2229862  |
| ACOT3  | 2.5321949  |
| ACOT4  | 4.9418077  |
| ACOT6  | 1.6916401  |
| ACOT8  | 1.8415267  |
| ACOT9  | 0.43072295 |
| ACOX1  | 4.56022    |
| ACOX2  | 6.030079   |
| ACP1   | 2.1951783  |
| ACP2   | 1.5492461  |
| ACP5   | 4.431566   |
| ACP6   | 2.3497179  |
| ACRBP  | 0.81092143 |
| ACSF2  | 2.0763967  |
| ACSF3  | 1.4536946  |
| ACSL1  | 2.0747068  |
| ACSL3  | 1.5953343  |
| ACSL4  | 1.2579367  |
| ACSL5  | 0.41912627 |
| ACSM1  | 4.338312   |
| ACSM3  | 3.697776   |
| ACSM5  | 1.1543567  |
| ACTB   | 1.7663622  |
| ACTG1  | 1.6239283  |
| ACTL6A | 1.0761912  |
| ACTN4  | 0.82789445 |
| ACTR10 | 2.7998183  |
| ACTR1A | 0.9605863  |
| ACTR2  | 0.7819617  |
| ACTR3  | 1.3241022  |
| ACTR5  | 0.74600434 |
| ACTR6  | 1.1955378  |
| ACTR8  | 1.8322451  |
| ACVR1  | 1.4397166  |
| ACVR1B | 2.2791274  |
| ACVR2B | 0.52676654 |
| ACY3   | 2.0495622  |
| ADA    | 1.9854901  |
| ADAL   | 1.6892736  |
| ADAM10 | 1.1190073  |
| ADAM17 | 1.3016305  |
| ADAM23 | 2.235973   |
| ADAM8  | 0.90625787 |



|          |            |
|----------|------------|
| ADAM9    | 2.3414     |
| ADAMDEC1 | 0.6666424  |
| ADAMTS1  | 2.0883558  |
| ADAMTS4  | 2.791095   |
| ADAMTS7  | 3.1480718  |
| ADAMTS9  | 0.92812276 |
| ADAP1    | 0.4161656  |
| ADAP2    | 1.6982815  |
| ADAR     | 1.1739872  |
| ADAT2    | 2.8145921  |
| ADCK1    | 1.3407853  |
| ADCK2    | 1.2367513  |
| ADCK4    | 4.9560966  |
| ADCK5    | 0.7552526  |
| ADCY1    | 3.4454482  |
| ADH1     | 1.4801762  |
| ADH4     | 5.8654737  |
| ADH7     | 2.511626   |
| ADHFE1   | 3.1170194  |
| ADI1     | 1.0344212  |
| ADIPOR1  | 1.3188164  |
| ADIPOR2  | 2.19646    |
| ADK      | 4.384063   |
| ADM      | 2.9368083  |
| ADM2     | 1.06271    |
| ADNP     | 1.044348   |
| ADO      | 1.1624801  |
| ADORA1   | 3.866649   |
| ADPGK    | 1.7670195  |
| ADPRH    | 0.8917086  |
| ADPRHL2  | 1.3780835  |
| ADPRM    | 2.6911342  |
| ADRA1B   | 1.8784363  |
| ADRA2A   | 4.3086796  |
| ADRB2    | 2.0161707  |
| ADRBK1   | 0.5930078  |
| ADRBK2   | 1.0158937  |
| ADRM1    | 0.80019355 |
| ADSL     | 0.7561219  |
| ADSS     | 1.1651175  |
| ADTRP    | 2.2691424  |
| AEBP2    | 1.7799308  |
| AEN      | 3.0507739  |
| AES      | 0.6442807  |
| AFF1     | 0.7551     |

|        |            |
|--------|------------|
| AFF4   | 2.931011   |
| AFG3L1 | 2.7961886  |
| AFG3L2 | 3.396701   |
| AFM    | 10.154221  |
| AFMID  | 0.52967167 |
| AFP    | 1.4785123  |
| AFTPH  | 1.9667022  |
| AGA    | 2.239004   |
| AGAP3  | 0.50927377 |
| AGFG1  | 1.5709336  |
| AGFG2  | 0.99877596 |
| AGGF1  | 1.2043173  |
| AGK    | 1.1503103  |
| AGL    | 1.1378539  |
| AGMAT  | 3.959705   |
| AGMO   | 0.9741404  |
| AGO2   | 1.5956843  |
| AGO3   | 0.92597747 |
| AGPAT2 | 3.0882566  |
| AGPAT3 | 2.5593445  |
| AGPAT5 | 2.71322    |
| AGPAT6 | 2.3098314  |
| AGPAT9 | 3.7668817  |
| AGT    | 5.9557247  |
| AGTR1A | 3.5307677  |
| AGXT   | 8.442112   |
| AGXT2  | 7.136546   |
| AHCTF1 | 0.77573705 |
| AHCY   | 5.8615665  |
| AHCYL1 | 1.7923186  |
| AHSA1  | 1.8439815  |
| AHSG   | 9.150278   |
| AIDA   | 0.9262631  |
| AIFM1  | 3.0862849  |
| AIFM2  | 2.7848718  |
| AIG1   | 2.4074342  |
| AIM1   | 3.1386087  |
| AIMP1  | 1.9529335  |
| AIMP2  | 2.5059283  |
| AIP    | 0.7426541  |
| AK2    | 2.488777   |
| AK3    | 1.5787742  |
| AK4    | 5.6381207  |
| AK6    | 1.7844317  |
| AKAP1  | 1.6477325  |

|          |            |
|----------|------------|
| AKAP10   | 0.77079153 |
| AKAP11   | 1.9763014  |
| AKAP12   | 2.0829175  |
| AKAP13   | 0.39584565 |
| AKAP8    | 0.39375448 |
| AKAP8L   | 1.0915349  |
| AKAP9    | 1.76141    |
| AKIP1    | 1.3664362  |
| AKIRIN1  | 2.1064394  |
| AKIRIN2  | 1.2189591  |
| AKR1A1   | 0.8506367  |
| AKR1B7   | 1.7830136  |
| AKR1B8   | 0.42182612 |
| AKR1C12  | 5.916465   |
| AKR1C13  | 4.2650156  |
| AKR1C18  | 1.1557326  |
| AKR1C19  | 3.1408503  |
| AKR1C20  | 0.55533385 |
| AKR1C6   | 4.670598   |
| AKR1E1   | 2.0716505  |
| AKR7A5   | 1.625911   |
| AKT1     | 0.37552667 |
| AKT1S1   | 1.7705328  |
| AKT2     | 1.7094209  |
| ALAD     | 0.559531   |
| ALAS1    | 1.7471993  |
| ALB      | 8.478748   |
| ALDH16A1 | 2.028179   |
| ALDH1A3  | 1.4364126  |
| ALDH1B1  | 3.581752   |
| ALDH1L1  | 5.919813   |
| ALDH1L2  | 2.9281683  |
| ALDH2    | 2.0160663  |
| ALDH4A1  | 1.8956859  |
| ALDH5A1  | 3.7491329  |
| ALDH6A1  | 3.2057073  |
| ALDH7A1  | 1.6347215  |
| ALDH8A1  | 7.6240473  |
| ALDH9A1  | 2.748226   |
| ALDOA    | 2.128994   |
| ALDOB    | 9.570196   |
| ALDOC    | 1.5298884  |
| ALG1     | 2.379516   |
| ALG10B   | 1.5746787  |
| ALG11    | 2.6987045  |

|          |            |
|----------|------------|
| ALG12    | 0.65842533 |
| ALG13    | 2.2753725  |
| ALG14    | 2.1432745  |
| ALG2     | 2.0709674  |
| ALG3     | 1.883153   |
| ALG5     | 2.3815668  |
| ALG6     | 1.1897995  |
| ALG8     | 3.2656398  |
| ALG9     | 2.4015834  |
| ALKBH1   | 2.0114248  |
| ALKBH2   | 3.3280618  |
| ALKBH3   | 2.0762742  |
| ALKBH4   | 0.5180545  |
| ALKBH5   | 2.420215   |
| ALKBH6   | 1.9476359  |
| ALKBH7   | 0.9468863  |
| ALKBH8   | 1.1045527  |
| ALPK1    | 4.18443    |
| ALPL     | 2.7485554  |
| ALS2CL   | 0.57604194 |
| ALX4     | 1.739182   |
| ALYREF   | 1.2738903  |
| AMACR    | 4.7743444  |
| AMBP     | 9.354555   |
| AMBRA1   | 1.7777331  |
| AMD2     | 0.39277577 |
| AMDHD1   | 3.5015771  |
| AMDHD2   | 1.3250382  |
| AMER3    | 1.0216722  |
| AMFR     | 2.3498642  |
| AMICA1   | 0.44801974 |
| AMIGO1   | 1.4753141  |
| AMIGO2   | 1.9216304  |
| AMIGO3   | 1.5895767  |
| AMMECR1  | 1.0161064  |
| AMMECR1L | 2.5759828  |
| AMN      | 4.082223   |
| AMN1     | 1.2834084  |
| AMOT     | 1.4466002  |
| AMPD2    | 2.0719845  |
| AMPD3    | 1.1958613  |
| AMY1     | 7.3139772  |
| AMY2A5   | 4.8978434  |
| AMZ2     | 1.0754521  |
| ANAPC1   | 1.4812825  |

|          |            |
|----------|------------|
| ANAPC11  | 0.53557944 |
| ANAPC13  | 0.6577909  |
| ANAPC15  | 1.4334252  |
| ANAPC16  | 1.7024701  |
| ANAPC4   | 0.8765018  |
| ANAPC5   | 0.50929236 |
| ANAPC7   | 1.7686837  |
| ANG      | 5.880186   |
| ANG2     | 3.690625   |
| ANG3     | 2.2014525  |
| ANG4     | 5.381316   |
| ANGEL2   | 0.97640395 |
| ANGPT2   | 1.7369621  |
| ANGPTL3  | 2.8369524  |
| ANGPTL4  | 3.2455952  |
| ANGPTL6  | 0.8800361  |
| ANK      | 2.4466188  |
| ANKFY1   | 1.4338939  |
| ANKHD1   | 1.7884886  |
| ANKIB1   | 1.9028809  |
| ANKLE2   | 0.84296465 |
| ANKMY1   | 1.0241795  |
| ANKRA2   | 0.9723251  |
| ANKRD10  | 0.82727337 |
| ANKRD11  | 1.5026982  |
| ANKRD13B | 0.59314036 |
| ANKRD13C | 1.7179639  |
| ANKRD16  | 1.4206212  |
| ANKRD17  | 2.356706   |
| ANKRD2   | 2.0989032  |
| ANKRD22  | 1.077652   |
| ANKRD26  | 0.7759135  |
| ANKRD27  | 2.1174352  |
| ANKRD28  | 2.1691582  |
| ANKRD32  | 0.49716783 |
| ANKRD37  | 2.7191122  |
| ANKRD39  | 1.1153357  |
| ANKRD46  | 0.78570724 |
| ANKRD49  | 2.7916057  |
| ANKRD52  | 2.4527142  |
| ANKRD9   | 1.1645877  |
| ANKS1    | 0.57635283 |
| ANKS3    | 1.0537024  |
| ANKS4B   | 0.8122089  |
| ANKZF1   | 2.7219756  |

|        |            |
|--------|------------|
| ANO10  | 1.5213258  |
| ANO2   | 2.6257355  |
| ANP32A | 0.3472383  |
| ANP32B | 1.0438917  |
| ANPEP  | 2.3735821  |
| ANXA4  | 0.28199697 |
| ANXA6  | 0.4236176  |
| ANXA7  | 2.1599877  |
| AOAH   | 2.7830575  |
| AOC2   | 1.4860361  |
| AOX1   | 0.8319719  |
| AP1AR  | 1.6426144  |
| AP1B1  | 2.064698   |
| AP1G1  | 1.9360569  |
| AP1M1  | 1.8481319  |
| AP1S1  | 1.4118087  |
| AP2A1  | 1.6873515  |
| AP2A2  | 0.65497327 |
| AP2M1  | 2.0479715  |
| AP2S1  | 1.3650868  |
| AP3B1  | 1.8562176  |
| AP3D1  | 2.0403068  |
| AP3M1  | 2.7299397  |
| AP3S1  | 2.3650901  |
| AP3S2  | 0.54414296 |
| AP4B1  | 2.3264592  |
| AP4M1  | 1.0177505  |
| AP5B1  | 2.4234178  |
| AP5M1  | 1.4747875  |
| AP5S1  | 3.8754327  |
| AP5Z1  | 1.3191884  |
| APAF1  | 1.8777053  |
| APBA3  | 2.4308026  |
| APBB3  | 4.876609   |
| APCS   | 12.513647  |
| APEH   | 1.8007505  |
| APELA  | 1.0145812  |
| APEX1  | 2.7690442  |
| APH1A  | 0.46074986 |
| APH1B  | 0.40208912 |
| API5   | 0.97470117 |
| APIP   | 2.2601159  |
| APLP2  | 0.55180097 |
| APMAP  | 1.3034451  |
| APOA1  | 10.108978  |

|         |            |
|---------|------------|
| APOA1BP | 0.43929887 |
| APOA2   | 5.4197235  |
| APOA4   | 6.2741203  |
| APOA5   | 7.2972517  |
| APOB    | 9.317396   |
| APOBEC1 | 2.341242   |
| APOC1   | 5.4690523  |
| APOC2   | 5.5125237  |
| APOC3   | 7.5229006  |
| APOC4   | 9.154554   |
| APOE    | 4.2588253  |
| APOF    | 9.77665    |
| APOH    | 10.087458  |
| APOL10B | 0.7542155  |
| APOL7A  | 1.3620648  |
| APOL9A  | 3.9509122  |
| APOL9B  | 4.377185   |
| APOLD1  | 2.7392118  |
| APOM    | 7.6911736  |
| APON    | 9.400627   |
| APOO    | 2.5397265  |
| APOOL   | 2.423168   |
| APOPT1  | 2.1962864  |
| APPBP2  | 1.2662032  |
| APPL1   | 1.1672719  |
| APPL2   | 1.2869842  |
| APRT    | 2.2029274  |
| AQP11   | 3.3817937  |
| AQP8    | 4.331229   |
| AQP9    | 3.6432557  |
| AQR     | 1.2565565  |
| ARAF    | 2.5362089  |
| ARAP1   | 1.0521042  |
| ARCN1   | 2.336723   |
| AREG    | 1.6285996  |
| AREL1   | 2.432459   |
| ARF1    | 1.4847744  |
| ARF3    | 0.48222184 |
| ARF4    | 2.4903147  |
| ARF5    | 0.4132173  |
| ARF6    | 1.9711754  |
| ARFGAP1 | 2.094187   |
| ARFGAP2 | 2.0984643  |
| ARFGAP3 | 1.2835224  |
| ARFGEF1 | 1.5966675  |

|           |            |
|-----------|------------|
| ARFGEF2   | 1.9813948  |
| ARFIP1    | 0.9369252  |
| ARFIP2    | 1.4489281  |
| ARG1      | 10.152939  |
| ARG2      | 3.2426794  |
| ARGLU1    | 1.1570814  |
| ARHGAP1   | 0.6838949  |
| ARHGAP12  | 2.165488   |
| ARHGAP17  | 1.0352108  |
| ARHGAP21  | 0.4116509  |
| ARHGAP26  | 2.5345454  |
| ARHGAP35  | 1.84324    |
| ARHGAP42  | 0.42233205 |
| ARHGAP5   | 2.2354991  |
| ARHGDIA   | 1.0630248  |
| ARHGDIB   | 0.6011641  |
| ARHGEF10L | 2.7513754  |
| ARHGEF11  | 0.52619076 |
| ARHGEF12  | 1.1062734  |
| ARHGEF15  | 3.1658356  |
| ARHGEF26  | 2.1386826  |
| ARHGEF3   | 0.7253697  |
| ARHGEF5   | 1.3789723  |
| ARID1A    | 0.5341704  |
| ARID1B    | 0.994117   |
| ARID3A    | 0.46898246 |
| ARID4A    | 0.66190624 |
| ARID5A    | 3.4174516  |
| ARIH1     | 1.4873857  |
| ARIH2     | 2.3796341  |
| ARL1      | 2.6487424  |
| ARL13B    | 0.5512538  |
| ARL14EP   | 1.874701   |
| ARL15     | 1.1152818  |
| ARL16     | 1.2264788  |
| ARL4A     | 3.800607   |
| ARL4C     | 0.63149095 |
| ARL4D     | 1.4163     |
| ARL5B     | 1.0271404  |
| ARL6      | 1.5072029  |
| ARL6IP1   | 0.41615844 |
| ARL6IP4   | 0.8719437  |
| ARL6IP5   | 0.40874982 |
| ARL6IP6   | 3.4294403  |
| ARL8A     | 2.5019372  |



|        |            |
|--------|------------|
| ARL8B  | 1.583081   |
| ARMC1  | 1.763912   |
| ARMC10 | 0.96899295 |
| ARMC5  | 0.4369805  |
| ARMC8  | 1.4479959  |
| ARMCX3 | 2.2294118  |
| ARMCX5 | 2.0837543  |
| ARNT   | 1.5204527  |
| ARNTL  | 1.4195364  |
| ARPC1A | 0.74590945 |
| ARPC1B | 1.8343146  |
| ARPC2  | 1.3912728  |
| ARPC3  | 1.4062426  |
| ARPC4  | 1.0462573  |
| ARPC5  | 0.9404123  |
| ARPC5L | 0.5972197  |
| ARRB2  | 1.4251583  |
| ARRDC2 | 0.8539989  |
| ARRDC4 | 5.1516247  |
| ARSA   | 2.6254632  |
| ARSG   | 3.6315486  |
| AS3MT  | 3.7769287  |
| ASAH1  | 0.9012644  |
| ASAP2  | 0.6738918  |
| ASB13  | 1.1479394  |
| ASB4   | 2.5084493  |
| ASB6   | 1.409764   |
| ASB7   | 1.5866201  |
| ASB8   | 1.6156676  |
| ASCC2  | 1.2618306  |
| ASCC3  | 1.9969699  |
| ASCL1  | 0.35844874 |
| ASGR1  | 7.384157   |
| ASGR2  | 7.9595184  |
| ASH1L  | 1.4275653  |
| ASH2L  | 0.8298166  |
| ASIC3  | 0.50529015 |
| ASL    | 6.4272623  |
| ASNA1  | 1.3474219  |
| ASNS   | 3.4442732  |
| ASNSD1 | 1.4525931  |
| ASPA   | 1.4986994  |
| ASPDH  | 1.2807474  |
| ASPG   | 6.673957   |
| ASPH   | 1.0314789  |

|         |            |
|---------|------------|
| ASPRV1  | 2.3569787  |
| ASPSCR1 | 1.0613096  |
| ASS1    | 4.755933   |
| ASUN    | 1.5942466  |
| ASXL1   | 0.85632443 |
| ASXL2   | 0.8702519  |
| ATAD1   | 1.9546688  |
| ATAD2B  | 0.8635714  |
| ATAD3A  | 3.165209   |
| ATE1    | 1.0958936  |
| ATF1    | 1.8112681  |
| ATF2    | 1.3243906  |
| ATF3    | 5.041786   |
| ATF4    | 3.051211   |
| ATF5    | 3.5483143  |
| ATF6    | 2.0384529  |
| ATF6B   | 1.246144   |
| ATF7IP  | 1.4644649  |
| ATG10   | 0.91341615 |
| ATG101  | 1.295614   |
| ATG12   | 1.6374943  |
| ATG13   | 2.3546584  |
| ATG14   | 2.0060022  |
| ATG16L1 | 2.119118   |
| ATG16L2 | 3.7596252  |
| ATG2A   | 3.298197   |
| ATG2B   | 1.156127   |
| ATG3    | 1.6041329  |
| ATG4B   | 2.1106644  |
| ATG4C   | 0.9913738  |
| ATG4D   | 2.3130128  |
| ATG5    | 1.8071482  |
| ATG7    | 1.8260777  |
| ATG9A   | 2.1992137  |
| ATHL1   | 0.47459388 |
| ATIC    | 1.0908792  |
| ATL1    | 1.8015943  |
| ATL2    | 2.9357688  |
| ATN1    | 0.95438075 |
| ATOX1   | 1.6539857  |
| ATP10D  | 1.0756929  |
| ATP11B  | 1.2289317  |
| ATP11C  | 2.4593432  |
| ATP13A1 | 2.0695112  |
| ATP13A2 | 0.48125243 |

|           |            |
|-----------|------------|
| ATP13A3   | 1.0335219  |
| ATP1A1    | 0.92175937 |
| ATP1B1    | 0.6911466  |
| ATP1B3    | 1.4375875  |
| ATP2A2    | 1.390888   |
| ATP5A1    | 1.9598367  |
| ATP5B     | 1.9492972  |
| ATP5C1    | 2.1086829  |
| ATP5C1-PS | 1.7502086  |
| ATP5D     | 1.9528944  |
| ATP5E     | 1.8090956  |
| ATP5F1    | 2.4077046  |
| ATP5G1    | 2.876181   |
| ATP5G2    | 1.2120278  |
| ATP5G3    | 3.0934637  |
| ATP5H     | 1.3776224  |
| ATP5J     | 2.0628226  |
| ATP5J2    | 1.7357728  |
| ATP5K     | 1.6756675  |
| ATP5L     | 1.8189971  |
| ATP5O     | 1.911567   |
| ATP5S     | 2.9980998  |
| ATP5SL    | 2.1176288  |
| ATP6      | 3.7107117  |
| ATP6AP1   | 1.3655283  |
| ATP6AP2   | 2.2489665  |
| ATP6V0A1  | 1.7836292  |
| ATP6V0A2  | 1.5575082  |
| ATP6V0A4  | 4.624897   |
| ATP6V0B   | 1.953346   |
| ATP6V0C   | 2.0268161  |
| ATP6V0D1  | 1.315511   |
| ATP6V0E   | 1.158457   |
| ATP6V1A   | 1.2692101  |
| ATP6V1B2  | 1.4291155  |
| ATP6V1C1  | 2.2962868  |
| ATP6V1D   | 2.5462248  |
| ATP6V1E1  | 2.3628786  |
| ATP6V1F   | 1.642041   |
| ATP6V1G1  | 1.1172097  |
| ATP6V1H   | 2.345225   |
| ATP8      | 2.7905867  |
| ATP8B1    | 2.557379   |
| ATP9A     | 1.9691002  |
| ATP9B     | 1.149445   |

|          |            |
|----------|------------|
| ATPAF1   | 1.2301321  |
| ATPAF2   | 0.8633945  |
| ATR      | 1.6341422  |
| ATRAID   | 1.791951   |
| ATRIP    | 0.8737924  |
| ATRN     | 0.80184245 |
| ATXN10   | 1.1731431  |
| ATXN1L   | 0.42574525 |
| ATXN2    | 2.388068   |
| ATXN2L   | 2.1484754  |
| ATXN7    | 3.5937188  |
| ATXN7L1  | 0.40603018 |
| ATXN7L3B | 2.0126593  |
| AXIN1    | 1.4074886  |
| AZGP1    | 9.2260275  |
| AZI2     | 1.9970174  |
| AZIN1    | 0.78860974 |
| B2M      | 2.007596   |
| B3GALNT1 | 1.3324916  |
| B3GALNT2 | 0.9080441  |
| B3GALT1  | 7.891714   |
| B3GALT6  | 1.4990926  |
| B3GAT3   | 0.25021315 |
| B3GNT1   | 0.60077834 |
| B3GNT2   | 1.6026685  |
| B4GALNT1 | 1.6245196  |
| B4GALT1  | 1.5680645  |
| B4GALT3  | 1.0151389  |
| B4GALT5  | 0.62862754 |
| B4GALT6  | 0.41223502 |
| B4GALT7  | 0.53786397 |
| B9D2     | 1.7953231  |
| BAAT     | 6.7504435  |
| BABAM1   | 1.9571588  |
| BACE1    | 0.9743836  |
| BACE2    | 0.43261123 |
| BACH1    | 2.4616663  |
| BAD      | 1.0099509  |
| BAG3     | 1.2468617  |
| BAG4     | 1.3661041  |
| BAG5     | 1.5080693  |
| BAG6     | 1.2410138  |
| BAHCC1   | 2.3394525  |
| BAHD1    | 1.4892771  |
| BAIAP2L1 | 1.1239874  |

|         |            |
|---------|------------|
| BAK1    | 1.77403    |
| BANF1   | 1.4454949  |
| BAP1    | 2.4991915  |
| BASP1   | 1.2020817  |
| BATF    | 2.311742   |
| BATF2   | 1.8826482  |
| BATF3   | 4.1581106  |
| BAX     | 3.043475   |
| BAZ1A   | 0.794595   |
| BAZ2A   | 1.3181918  |
| BAZ2B   | 0.59263825 |
| BBC3    | 1.065696   |
| BBIP1   | 0.5611489  |
| BBOX1   | 3.14128    |
| BBS12   | 0.30316067 |
| BBS2    | 0.3469479  |
| BBS4    | 0.46094012 |
| BBS9    | 0.677397   |
| BBX     | 1.0333748  |
| BCAP29  | 1.491965   |
| BCAP31  | 1.2166708  |
| BCAR1   | 1.2971027  |
| BCAR3   | 0.60691476 |
| BCAS2   | 1.7936771  |
| BCCIP   | 3.0132244  |
| BCDIN3D | 1.4924538  |
| BCHE    | 1.5219724  |
| BCKDHA  | 2.9301426  |
| BCKDHB  | 5.0024767  |
| BCL10   | 2.4682276  |
| BCL2A1C | 2.2841604  |
| BCL2A1D | 2.006523   |
| BCL2L1  | 2.2031767  |
| BCL2L11 | 0.76413274 |
| BCL2L13 | 0.85361886 |
| BCL2L14 | 0.8658955  |
| BCL2L15 | 2.2125475  |
| BCL3    | 3.3917382  |
| BCL6    | 0.8684094  |
| BCL7A   | 0.970711   |
| BCL7B   | 1.3474066  |
| BCL7C   | 0.45261073 |
| BCLAF1  | 1.330878   |
| BCMO1   | 7.2130613  |
| BCO2    | 2.3277042  |

|         |            |
|---------|------------|
| BCOR    | 1.1440914  |
| BCR     | 0.69991803 |
| BCS1L   | 1.4178064  |
| BDH2    | 0.89430594 |
| BDP1    | 1.2223585  |
| BEAN1   | 0.6553149  |
| BECN1   | 1.6473434  |
| BEND3   | 1.9943635  |
| BET1    | 2.467408   |
| BET1L   | 2.3644264  |
| BFAR    | 2.5206106  |
| BGLAP2  | 0.82307386 |
| BHLHA15 | 4.1358023  |
| BHLHE40 | 3.603235   |
| BHMT    | 8.005079   |
| BHMT2   | 9.979908   |
| BICD1   | 0.64757943 |
| BID     | 3.776909   |
| BIN1    | 0.44001746 |
| BIN3    | 1.180558   |
| BIRC2   | 4.2831106  |
| BIRC3   | 2.2500422  |
| BIRC6   | 1.6226337  |
| BIVM    | 1.0452013  |
| BLCAP   | 3.1460092  |
| BLM     | 1.5318525  |
| BLMH    | 1.8959849  |
| BLOC1S1 | 1.4305332  |
| BLOC1S2 | 1.6849654  |
| BLOC1S3 | 1.4366112  |
| BLOC1S4 | 2.1604831  |
| BLOC1S5 | 1.6691802  |
| BLOC1S6 | 1.4179609  |
| BLVRB   | 2.3708465  |
| BLZF1   | 1.9526293  |
| BMI1    | 1.0976117  |
| BMP1    | 0.63533425 |
| BMP2    | 1.6171458  |
| BMP2K   | 1.0807154  |
| BMP8A   | 1.2828865  |
| BMPER   | 2.629811   |
| BMS1    | 1.2841511  |
| BNIP1   | 1.7705369  |
| BNIP3   | 4.267869   |
| BNIP3L  | 1.3482759  |

|         |            |
|---------|------------|
| BOD1    | 1.3887308  |
| BOK     | 1.6175106  |
| BOLA2   | 2.3473814  |
| BOLA3   | 1.4981067  |
| BOP1    | 2.4828699  |
| BPHL    | 0.9677589  |
| BPIFC   | 2.1433141  |
| BPNT1   | 1.2556801  |
| BPTF    | 0.94167733 |
| BRAF    | 0.9395039  |
| BRAP    | 2.7153442  |
| BRAT1   | 1.2332871  |
| BRCC3   | 1.0949028  |
| BRD1    | 0.6710777  |
| BRD2    | 0.88251996 |
| BRD3    | 0.2894218  |
| BRD4    | 1.0772707  |
| BRD7    | 0.7386987  |
| BRD8    | 1.564354   |
| BRD9    | 0.833858   |
| BRE     | 1.8830082  |
| BRF2    | 1.4170165  |
| BRI3    | 1.5045073  |
| BRI3BP  | 1.0800669  |
| BRINP2  | 1.6133628  |
| BRIP1OS | 2.1048188  |
| BRIX1   | 2.3947556  |
| BRK1    | 0.59186864 |
| BRMS1   | 1.8583958  |
| BROX    | 1.147526   |
| BRPF1   | 1.6477039  |
| BRPF3   | 2.513983   |
| BRWD1   | 0.6672368  |
| BRWD3   | 1.4484928  |
| BSDC1   | 2.65292    |
| BSG     | 1.3085263  |
| BST1    | 1.0317991  |
| BST2    | 4.0600796  |
| BTAF1   | 1.2735679  |
| BTBD10  | 0.45721412 |
| BTBD16  | 2.223089   |
| BTBD19  | 1.2200141  |
| BTBD6   | 0.7581494  |
| BTBD9   | 0.7710526  |
| BTC     | 3.1218362  |

|           |            |
|-----------|------------|
| BTD       | 3.6573222  |
| BTF3      | 1.7076027  |
| BTF3L4    | 1.9765251  |
| BTG1      | 1.2163002  |
| BTG2      | 3.334276   |
| BTG3      | 1.5400331  |
| BTK       | 0.2761526  |
| BTN1A1    | 3.724778   |
| BUB3      | 1.2381618  |
| BUD13     | 1.083189   |
| BUD31     | 1.9437635  |
| BYSL      | 1.4515641  |
| BZW1      | 2.3962953  |
| BZW2      | 0.7111752  |
| C1GALT1   | 1.7914512  |
| C1GALT1C1 | 1.9006302  |
| C1QA      | 2.0641377  |
| C1QB      | 1.9021208  |
| C1QBP     | 2.8184907  |
| C1QC      | 1.609268   |
| C1QL3     | 2.2120235  |
| C1QTNF1   | 0.8409989  |
| C1RA      | 4.2563467  |
| C1RB      | 3.4817126  |
| C1RL      | 4.9609575  |
| C1S1      | 2.931946   |
| C1S2      | 2.8937666  |
| C2        | 4.0796986  |
| C2CD2     | 1.8593307  |
| C2CD2L    | 2.2231576  |
| C3        | 3.7652035  |
| C4B       | 4.2947817  |
| C4BP      | 10.6496315 |
| C8A       | 4.7938757  |
| C8B       | 5.4072266  |
| C8G       | 5.0531435  |
| C9        | 4.912554   |
| CAAP1     | 1.6968987  |
| CAB39     | 0.68304324 |
| CAB39L    | 1.4200737  |
| CABIN1    | 0.65797067 |
| CABLES1   | 2.1014478  |
| CABLES2   | 1.5595667  |
| CABP5     | 0.560436   |
| CABYR     | 2.9464502  |



|         |            |
|---------|------------|
| CACFD1  | 2.2055004  |
| CACTIN  | 1.4133976  |
| CACUL1  | 2.28466    |
| CACYBP  | 1.5664742  |
| CAD     | 1.0541828  |
| CADPS2  | 0.84618354 |
| CAGE1   | 0.39277935 |
| CALD1   | 1.1695826  |
| CALM1   | 1.0563681  |
| CALM2   | 0.7973287  |
| CALM3   | 0.34334064 |
| CALR    | 3.171757   |
| CALR3   | 1.6038158  |
| CALU    | 1.9645483  |
| CAMK1D  | 0.7785821  |
| CAMK2B  | 1.9852376  |
| CAMK2D  | 0.33762145 |
| CAMK2G  | 0.3442762  |
| CAMK2N1 | 0.5226593  |
| CAMK2N2 | 2.8932045  |
| CAMKK1  | 0.27852535 |
| CAMKMT  | 0.4796121  |
| CAML    | 2.113086   |
| CAMSAP1 | 1.4164736  |
| CAMSAP3 | 1.3404     |
| CAMTA2  | 2.0206382  |
| CAND1   | 1.4743602  |
| CANT1   | 1.7924447  |
| CANX    | 1.8752892  |
| CAP1    | 0.74001384 |
| CAPG    | 0.3186853  |
| CAPN10  | 1.041106   |
| CAPN7   | 1.2701247  |
| CAPNS1  | 0.80943847 |
| CAPRIN1 | 1.2733729  |
| CAPZA1  | 2.9723852  |
| CAPZA2  | 1.8042214  |
| CAPZB   | 1.8314598  |
| CAR13   | 3.1800783  |
| CAR4    | 0.46820092 |
| CAR5A   | 2.365781   |
| CAR7    | 1.0902507  |
| CARD14  | 2.005852   |
| CARHSP1 | 2.091398   |
| CARM1   | 1.6325104  |

|          |            |
|----------|------------|
| CARNS1   | 0.752208   |
| CARS     | 2.7920625  |
| CARS2    | 1.4514787  |
| CASC3    | 1.5806739  |
| CASK     | 0.63549876 |
| CASP1    | 1.126548   |
| CASP2    | 0.69609857 |
| CASP4    | 2.5430982  |
| CASP6    | 1.3713305  |
| CASP7    | 2.4249246  |
| CASP8    | 1.9633458  |
| CASP9    | 0.7215693  |
| CAST     | 2.45531    |
| CATSPER2 | 2.3341806  |
| CBFA2T2  | 0.84335303 |
| CBFB     | 0.7776158  |
| CBL      | 0.86088014 |
| CBLB     | 1.4766839  |
| CBLC     | 4.0635185  |
| CBLL1    | 1.0160549  |
| CBR1     | 1.2456019  |
| CBR4     | 2.8788188  |
| CBS      | 5.870227   |
| CBWD1    | 1.4921267  |
| CBX1     | 0.8009708  |
| CBX2     | 1.5182054  |
| CBX3     | 0.59820247 |
| CBX4     | 0.5204046  |
| CC2D1A   | 0.98372865 |
| CC2D1B   | 1.6257331  |
| CCAR1    | 2.0341356  |
| CCAR2    | 1.1682336  |
| CCBL1    | 5.181386   |
| CCBL2    | 5.4173193  |
| CCDC101  | 1.8346622  |
| CCDC104  | 1.2060459  |
| CCDC106  | 1.4130309  |
| CCDC107  | 0.41152263 |
| CCDC115  | 0.43186355 |
| CCDC117  | 1.4730151  |
| CCDC12   | 0.7985265  |
| CCDC120  | 1.9995897  |
| CCDC124  | 0.99569345 |
| CCDC125  | 0.90410423 |
| CCDC126  | 0.88461757 |

|          |            |
|----------|------------|
| CCDC127  | 0.7181721  |
| CCDC132  | 1.5476682  |
| CCDC134  | 1.2701161  |
| CCDC137  | 0.6104958  |
| CCDC138  | 3.1221793  |
| CCDC144B | 0.71222067 |
| CCDC159  | 0.56211233 |
| CCDC163  | 1.740278   |
| CCDC167  | 0.8614366  |
| CCDC174  | 0.7451513  |
| CCDC22   | 2.19301    |
| CCDC23   | 0.91196895 |
| CCDC25   | 2.3313158  |
| CCDC28A  | 0.40246892 |
| CCDC32   | 0.96504354 |
| CCDC43   | 1.6956661  |
| CCDC47   | 1.8824747  |
| CCDC53   | 1.9839675  |
| CCDC55   | 1.8879738  |
| CCDC58   | 3.3516614  |
| CCDC59   | 1.3661454  |
| CCDC6    | 1.4543579  |
| CCDC66   | 1.5175626  |
| CCDC68   | 0.50571847 |
| CCDC71   | 1.0562747  |
| CCDC71L  | 1.5753152  |
| CCDC77   | 0.6413982  |
| CCDC82   | 1.1571925  |
| CCDC86   | 2.478369   |
| CCDC88B  | 1.0048754  |
| CCDC9    | 0.8606062  |
| CCDC90B  | 0.5816972  |
| CCDC93   | 3.1034565  |
| CCDC97   | 1.0619271  |
| CCIN     | 2.515322   |
| CCL11    | 0.95827556 |
| CCL19    | 2.7594607  |
| CCL2     | 6.831405   |
| CCL3     | 4.173873   |
| CCL4     | 3.716564   |
| CCL5     | 0.95115066 |
| CCL7     | 4.8887434  |
| CCL9     | 4.6548605  |
| CCM2     | 1.3699739  |
| CCNC     | 1.182415   |

|         |            |
|---------|------------|
| CCNDBP1 | 0.7845638  |
| CCNE1   | 2.494014   |
| CCNF    | 0.4626093  |
| CCNG1   | 0.7727039  |
| CCNG2   | 1.8415093  |
| CCNH    | 0.7939203  |
| CCNI    | 1.344506   |
| CCNK    | 2.0100358  |
| CCNL1   | 2.9537938  |
| CCNL2   | 2.4648473  |
| CCNT1   | 1.4767909  |
| CCNT2   | 1.4678421  |
| CCNYL1  | 1.2966468  |
| CCP110  | 1.2943375  |
| CCPG1   | 1.2001207  |
| CCPG1OS | 1.0378573  |
| CCR5    | 0.6052544  |
| CCR8    | 1.9520774  |
| CCR9    | 0.7146504  |
| CCRL2   | 2.7141736  |
| CCRN4L  | 2.8269737  |
| CCS     | 2.023711   |
| CCSER2  | 0.8016579  |
| CCT2    | 2.1055357  |
| CCT3    | 2.3556225  |
| CCT4    | 1.8330524  |
| CCT5    | 1.587302   |
| CCT6A   | 2.0184891  |
| CCT7    | 1.4157059  |
| CCT8    | 2.444564   |
| CCZ1    | 1.6322806  |
| CD14    | 7.706579   |
| CD164   | 2.1221888  |
| CD1D1   | 2.8238242  |
| CD1D2   | 2.1882107  |
| CD274   | 3.061506   |
| CD28    | 2.6459744  |
| CD2AP   | 1.4340737  |
| CD2BP2  | 1.2339551  |
| CD300E  | 2.2798626  |
| CD300LF | 1.9699223  |
| CD300LG | 1.6320527  |
| CD302   | 5.308568   |
| CD320   | 0.87674165 |
| CD33    | 2.441262   |

|          |            |
|----------|------------|
| CD38     | 3.9669635  |
| CD3EAP   | 1.9514792  |
| CD40     | 0.5525811  |
| CD47     | 2.2938173  |
| CD48     | 0.31588054 |
| CD53     | 0.4005525  |
| CD55     | 1.7633402  |
| CD59A    | 0.6526854  |
| CD5L     | 4.632515   |
| CD63     | 1.7921107  |
| CD68     | 0.72185683 |
| CD81     | 0.6038201  |
| CD82     | 1.2178547  |
| CD86     | 1.0731969  |
| CDADC1   | 0.58055806 |
| CDC123   | 2.1406171  |
| CDC14B   | 2.0705488  |
| CDC16    | 1.3900635  |
| CDC25A   | 2.301957   |
| CDC26    | 1.0523093  |
| CDC34    | 2.224941   |
| CDC37    | 0.76668334 |
| CDC37L1  | 1.7359698  |
| CDC40    | 1.4777725  |
| CDC42    | 1.1945732  |
| CDC42EP2 | 1.2809985  |
| CDC42EP4 | 0.5569937  |
| CDC42EP5 | 2.5431144  |
| CDC42SE1 | 0.54056    |
| CDC42SE2 | 0.3908608  |
| CDC5L    | 1.1443555  |
| CDC73    | 1.1750243  |
| CDCA4    | 1.264272   |
| CDCP2    | 0.9280131  |
| CDH2     | 2.096164   |
| CDH3     | 3.6125872  |
| CDH6     | 0.43807006 |
| CDHR2    | 0.78860116 |
| CDHR5    | 3.9306643  |
| CDIP1    | 0.6523807  |
| CDIPT    | 0.7735293  |
| CDK10    | 1.3486412  |
| CDK11B   | 1.0211194  |
| CDK12    | 1.3376851  |
| CDK13    | 0.506613   |

|            |            |
|------------|------------|
| CDK16      | 0.5912893  |
| CDK17      | 1.757138   |
| CDK18      | 2.6982033  |
| CDK2       | 1.4536533  |
| CDK20      | 2.3188121  |
| CDK2AP1    | 1.179158   |
| CDK2AP2    | 1.3925645  |
| CDK4       | 1.1520336  |
| CDK5       | 0.5447898  |
| CDK5R1     | 0.92715263 |
| CDK5RAP1   | 2.5883443  |
| CDK5RAP2   | 1.040417   |
| CDK5RAP3   | 2.6964643  |
| CDK7       | 1.787133   |
| CDK8       | 1.7810433  |
| CDK9       | 1.5029309  |
| CDKAL1     | 1.0043714  |
| CDKN1A     | 2.834955   |
| CDKN1B     | 0.61811805 |
| CDKN2AIP   | 1.2265444  |
| CDKN2AIPNL | 1.5894692  |
| CDKN2C     | 0.38085842 |
| CDO1       | 4.9650764  |
| CDPF1      | 0.90638757 |
| CDS2       | 1.1503646  |
| CDT1       | 1.4713404  |
| CDV3       | 1.9007099  |
| CDYL       | 1.5416224  |
| CEACAM2    | 1.8490655  |
| CEBPA      | 2.9727962  |
| CEBPB      | 3.4491303  |
| CEBPD      | 2.936046   |
| CEBPG      | 2.9150345  |
| CEBPZ      | 2.614042   |
| CEBPZOS    | 0.7315514  |
| CECR5      | 2.3260891  |
| CELF1      | 1.9241803  |
| CELSR3     | 1.8929281  |
| CENPB      | 1.2791812  |
| CENPJ      | 0.6866014  |
| CENPL      | 2.1565866  |
| CENPM      | 4.011133   |
| CENPO      | 1.1952896  |
| CENPQ      | 0.6554136  |
| CENPT      | 0.690531   |

|           |            |
|-----------|------------|
| CENPV     | 1.8328269  |
| CENPW     | 0.86950135 |
| CEP112OS2 | 2.0001757  |
| CEP120    | 1.5080383  |
| CEP131    | 0.45053196 |
| CEP162    | 1.5618136  |
| CEP164    | 0.35873437 |
| CEP170    | 1.2013113  |
| CEP170B   | 3.4478526  |
| CEP19     | 0.6816275  |
| CEP192    | 1.3744719  |
| CEP350    | 1.3776584  |
| CEP55     | 3.2330577  |
| CEP57     | 1.5526869  |
| CEP63     | 1.483773   |
| CEP83     | 1.069144   |
| CEP85L    | 2.7910278  |
| CEP95     | 1.9509361  |
| CEP97     | 0.8233483  |
| CEPT1     | 1.8011534  |
| CERK      | 1.02898    |
| CERKL     | 2.5638278  |
| CERS2     | 1.6599476  |
| CERS6     | 1.8041444  |
| CES1B     | 8.894985   |
| CES1C     | 9.720636   |
| CES1D     | 2.5284927  |
| CES1E     | 1.1961539  |
| CES1G     | 1.4200876  |
| CES2A     | 9.325131   |
| CES2B     | 3.820802   |
| CES2C     | 4.465068   |
| CES2E     | 5.3235445  |
| CES2G     | 2.214596   |
| CES3A     | 6.5715714  |
| CES3B     | 3.266421   |
| CETN3     | 1.2222946  |
| CFB       | 5.9501534  |
| CFDP1     | 1.6696088  |
| CFH       | 4.549362   |
| CFHR1     | 8.524813   |
| CFHR2     | 4.4097347  |
| CFI       | 9.88666    |
| CFL1      | 1.1927459  |
| CFL2      | 1.7560856  |

|         |            |
|---------|------------|
| CFLAR   | 1.9989631  |
| CFP     | 2.3516314  |
| CGREF1  | 3.7314303  |
| CGRRF1  | 1.120363   |
| CH25H   | 3.2851865  |
| CHAC1   | 3.9566033  |
| CHAC2   | 1.6951044  |
| CHAF1B  | 0.70335937 |
| CHAMP1  | 1.4849625  |
| CHCHD1  | 2.095784   |
| CHCHD10 | 3.0654364  |
| CHCHD2  | 2.6427004  |
| CHCHD3  | 2.0641344  |
| CHCHD4  | 2.4546063  |
| CHCHD5  | 2.3741505  |
| CHCHD6  | 1.4274371  |
| CHCHD7  | 1.5792029  |
| CHD1    | 1.9595859  |
| CHD1L   | 0.9203851  |
| CHD2    | 1.5436203  |
| CHD3    | 0.4457147  |
| CHD3OS  | 0.33607435 |
| CHD4    | 1.4193146  |
| CHD7    | 2.775295   |
| CHD8    | 1.4404314  |
| CHD9    | 1.0425384  |
| CHDH    | 2.639334   |
| CHERP   | 1.342056   |
| CHFR    | 1.2846205  |
| CHIC2   | 1.9474967  |
| CHID1   | 2.1009166  |
| CHIL1   | 0.7352655  |
| CHKA    | 3.7865822  |
| CHKB    | 2.5329378  |
| CHM     | 1.1977298  |
| CHMP1A  | 1.4474208  |
| CHMP2A  | 2.3910358  |
| CHMP2B  | 1.2859342  |
| CHMP3   | 0.9050381  |
| CHMP4B  | 1.1917508  |
| CHMP5   | 1.06826    |
| CHMP6   | 1.6477201  |
| CHMP7   | 1.6013348  |
| CHN2    | 2.0260327  |
| CHORDC1 | 0.51370215 |



|         |            |
|---------|------------|
| CHP1    | 2.2215102  |
| CHPF2   | 2.6839259  |
| CHRAC1  | 2.2335174  |
| CHRM3   | 1.8061302  |
| CHST15  | 0.8559749  |
| CHSY3   | 3.3947158  |
| CHTF8   | 0.62183404 |
| CHTOP   | 1.4811847  |
| CHUK    | 3.1329854  |
| CHURC1  | 2.527261   |
| CIAO1   | 1.446224   |
| CIAPIN1 | 2.1532881  |
| CIART   | 1.0941603  |
| CIB1    | 2.1294467  |
| CIC     | 0.97274375 |
| CIDEB   | 3.197727   |
| CIDEC   | 1.5593193  |
| CIPC    | 1.7059443  |
| CIRBP   | 0.82974696 |
| CIRH1A  | 2.5350707  |
| CISD1   | 2.6147802  |
| CISD2   | 1.6793015  |
| CISD3   | 2.2010262  |
| CISH    | 2.593908   |
| CITED2  | 0.9283879  |
| CIZ1    | 0.80604815 |
| CKAP5   | 0.49473357 |
| CKLF    | 0.43488383 |
| CKMT1   | 0.5726106  |
| CKS1B   | 1.3839395  |
| CKS2    | 0.5460651  |
| CLASP1  | 0.5790069  |
| CLASRP  | 1.4366815  |
| CLCA1   | 1.393307   |
| CLCA2   | 2.5165293  |
| CLCA4   | 1.6140265  |
| CLCC1   | 1.4511235  |
| CLCN2   | 2.2361748  |
| CLCN3   | 1.3903282  |
| CLCN4-2 | 2.349182   |
| CLCN5   | 0.39781785 |
| CLCN7   | 2.5114915  |
| CLDN1   | 0.77826285 |
| CLDN12  | 3.1811893  |
| CLDN14  | 7.0430765  |

|         |            |
|---------|------------|
| CLDN2   | 5.0428753  |
| CLDN25  | 2.07877    |
| CLEC16A | 1.0597324  |
| CLEC1B  | 0.5331404  |
| CLEC2E  | 1.6816893  |
| CLEC4A1 | 1.6896083  |
| CLEC4D  | 1.6107938  |
| CLEC4E  | 3.3974102  |
| CLEC4F  | 0.48595214 |
| CLEC4G  | 4.093074   |
| CLIC1   | 1.0454981  |
| CLIC4   | 0.8714378  |
| CLINT1  | 1.9330575  |
| CLIP1   | 1.514602   |
| CLK1    | 1.7398002  |
| CLK2    | 1.2021863  |
| CLK4    | 2.107478   |
| CLMN    | 1.9797513  |
| CLN3    | 0.8629887  |
| CLN5    | 2.5524933  |
| CLN6    | 0.38502264 |
| CLN8    | 3.1357114  |
| CLNS1A  | 1.6971762  |
| CLOCK   | 1.2124441  |
| CLP1    | 1.2325323  |
| CLPB    | 2.589639   |
| CLPP    | 2.612252   |
| CLPTM1  | 1.6732605  |
| CLPTM1L | 3.0691254  |
| CLPX    | 3.4416158  |
| CLTA    | 1.7638991  |
| CLTB    | 1.7887018  |
| CLTC    | 1.4370587  |
| CLU     | 4.6516685  |
| CLUAP1  | 0.49753547 |
| CLUH    | 4.3204517  |
| CLYBL   | 2.7129822  |
| CMAH    | 1.5319202  |
| CMAS    | 1.5743244  |
| CMBL    | 0.92296386 |
| CMC1    | 2.3517244  |
| CMC2    | 0.47525668 |
| CMIP    | 1.3204048  |
| CML1    | 3.568413   |
| CML2    | 1.7876914  |

|         |            |
|---------|------------|
| CMPK1   | 2.266063   |
| CMPK2   | 0.6443393  |
| CMSS1   | 1.43665    |
| CMTM6   | 0.6824248  |
| CMTM7   | 0.26505685 |
| CMTM8   | 1.7598159  |
| CMTR1   | 2.0909379  |
| CNBP    | 1.6231062  |
| CNDP2   | 2.1155827  |
| CNEP1R1 | 1.2833922  |
| CNIH1   | 2.3452652  |
| CNIH4   | 1.1081555  |
| CNKSR3  | 2.7332623  |
| CNN3    | 2.0950062  |
| CNNM2   | 1.5989487  |
| CNNM3   | 1.6502111  |
| CNNM4   | 0.7602031  |
| CNOT1   | 1.4962275  |
| CNOT10  | 1.0751011  |
| CNOT2   | 1.0524218  |
| CNOT4   | 1.0981979  |
| CNOT6L  | 2.3287804  |
| CNOT7   | 1.1321707  |
| CNOT8   | 0.77618194 |
| CNPPD1  | 2.3282764  |
| CNPY2   | 2.3059742  |
| CNPY3   | 1.7006309  |
| CNR2    | 0.82663655 |
| CNTF    | 2.6264584  |
| CNTNAP1 | 3.7288306  |
| COA3    | 1.0838139  |
| COA4    | 0.76832175 |
| COA5    | 2.2068784  |
| COA6    | 1.721947   |
| COA7    | 4.2885866  |
| COASY   | 2.4374583  |
| COBLL1  | 1.548456   |
| COG1    | 0.7062571  |
| COG2    | 2.1311486  |
| COG3    | 1.923909   |
| COG4    | 0.88196635 |
| COG6    | 0.9776566  |
| COG7    | 1.4057724  |
| COG8    | 0.7195976  |
| COIL    | 1.3494477  |

|         |            |
|---------|------------|
| COL11A1 | 1.0342178  |
| COL17A1 | 1.7436261  |
| COL18A1 | 4.432412   |
| COL20A1 | 2.4414744  |
| COL27A1 | 1.9598906  |
| COL4A1  | 1.094384   |
| COLEC10 | 4.15703    |
| COLEC11 | 3.2445557  |
| COMMD10 | 1.5941746  |
| COMMD2  | 1.4654858  |
| COMMD3  | 1.9441783  |
| COMMD4  | 1.3661602  |
| COMMD5  | 1.6975877  |
| COMMD6  | 1.9273155  |
| COMMD7  | 1.3986084  |
| COMMD8  | 0.64222693 |
| COMMD9  | 1.9338915  |
| COMT    | 2.2620304  |
| COMTD1  | 2.5649831  |
| COPA    | 2.425195   |
| COPB1   | 2.2640398  |
| COPB2   | 2.867781   |
| COPE    | 2.8278124  |
| COPG2   | 0.39512897 |
| COPRS   | 2.0298178  |
| COPS2   | 2.4727151  |
| COPS3   | 1.6414502  |
| COPS4   | 1.8732202  |
| COPS5   | 2.5281608  |
| COPS6   | 2.1806986  |
| COPS7A  | 1.8586576  |
| COPS8   | 1.4530294  |
| COPZ1   | 2.0089824  |
| COPZ2   | 0.46271777 |
| COQ10A  | 2.0192406  |
| COQ10B  | 2.556863   |
| COQ2    | 1.7851741  |
| COQ4    | 1.5263574  |
| COQ5    | 2.507311   |
| COQ6    | 2.0043652  |
| COQ7    | 2.8077662  |
| COQ9    | 2.3577821  |
| CORO1B  | 1.3219903  |
| CORO1C  | 1.5859649  |
| CORO7   | 1.6368821  |

|         |            |
|---------|------------|
| COTL1   | 0.6883838  |
| COX1    | 1.7108297  |
| COX11   | 2.930414   |
| COX14   | 0.8216393  |
| COX15   | 1.0255525  |
| COX16   | 1.8310173  |
| COX18   | 3.11775    |
| COX19   | 1.602411   |
| COX2    | 2.1240358  |
| COX20   | 1.2285812  |
| COX3    | 2.5423193  |
| COX4I1  | 2.019441   |
| COX5A   | 2.629934   |
| COX5B   | 2.2449615  |
| COX6A1  | 2.287449   |
| COX6B1  | 1.6685274  |
| COX6C   | 2.2811463  |
| COX7A2  | 2.0987327  |
| COX7A2L | 1.395231   |
| COX7B   | 2.5028002  |
| COX7C   | 2.684683   |
| COX8A   | 1.5712302  |
| CP      | 6.0636826  |
| CPB2    | 10.885954  |
| CPD     | 0.46618962 |
| CPEB2   | 2.7149165  |
| CPEB3   | 1.7577636  |
| CPEB4   | 1.4542534  |
| CPLX2   | 0.46034408 |
| CPN1    | 7.8551855  |
| CPN2    | 4.2390575  |
| CPNE1   | 0.44196677 |
| CPNE2   | 1.4708159  |
| CPNE8   | 3.681032   |
| CPOX    | 2.9700692  |
| CPPED1  | 2.2893865  |
| CPQ     | 1.2612169  |
| CPS1    | 8.693358   |
| CPSF1   | 1.1931012  |
| CPSF2   | 1.2879853  |
| CPSF3   | 1.5910218  |
| CPSF3L  | 1.6345842  |
| CPSF4   | 1.707289   |
| CPSF6   | 1.676008   |
| CPSF7   | 1.9458334  |

|         |            |
|---------|------------|
| CPT1A   | 3.0706303  |
| CPT2    | 3.2098048  |
| CR1L    | 1.6542985  |
| CRADD   | 1.0192239  |
| CRAMP1L | 1.1349642  |
| CRBN    | 1.291703   |
| CRCP    | 4.0767555  |
| CREB3   | 2.5302064  |
| CREB3L2 | 2.106127   |
| CREB3L3 | 11.944112  |
| CREB5   | 3.2992709  |
| CREBBP  | 1.1754944  |
| CREBL2  | 1.6722062  |
| CREBZF  | 0.7486074  |
| CREG1   | 2.2552245  |
| CRELD1  | 2.4958246  |
| CRELD2  | 4.546502   |
| CREM    | 3.298094   |
| CRIPT   | 1.9158785  |
| CRK     | 1.5791428  |
| CRKL    | 1.5078027  |
| CRLF2   | 1.266361   |
| CRLF3   | 0.4703815  |
| CRLS1   | 2.8025396  |
| CRNKL1  | 1.9294403  |
| CROT    | 3.0596907  |
| CRP     | 8.293411   |
| CRTC1   | 0.99271107 |
| CRTC2   | 2.2702887  |
| CRTC3   | 0.56293225 |
| CRY1    | 2.6371086  |
| CRY2    | 1.4358785  |
| CRYBB3  | 7.492955   |
| CRYZ    | 3.7334049  |
| CRYZL1  | 1.8488863  |
| CS      | 0.60891366 |
| CSAD    | 0.36058164 |
| CSDE1   | 0.9759629  |
| CSE1L   | 1.9367058  |
| CSF1    | 2.1813357  |
| CSF1R   | 0.5740354  |
| CSF2RA  | 1.2835801  |
| CSF2RB  | 1.8874333  |
| CSF2RB2 | 1.8697164  |
| CSF3    | 4.684376   |

|          |            |
|----------|------------|
| CSF3R    | 2.0599778  |
| CSL      | 0.7907858  |
| CSNK1A1  | 1.5658925  |
| CSNK1D   | 1.6567037  |
| CSNK1E   | 0.55721307 |
| CSNK1G1  | 1.1540594  |
| CSNK1G2  | 1.2110374  |
| CSNK1G3  | 0.86695933 |
| CSNK2A1  | 1.6063468  |
| CSNK2A2  | 1.3863685  |
| CSNK2B   | 1.6943309  |
| CSPP1    | 1.3771212  |
| CSPRS    | 0.68196464 |
| CSRNP1   | 2.8567874  |
| CSRP2    | 1.2216079  |
| CSRP2BP  | 0.97489524 |
| CSRP3    | 2.2875373  |
| CST7     | 0.49253488 |
| CSTB     | 3.3284276  |
| CSTF1    | 2.2885273  |
| CSTF2T   | 1.6576254  |
| CSTF3    | 1.3343866  |
| CTAGE5   | 2.7892659  |
| CTBS     | 1.1844583  |
| CTC1     | 0.62604403 |
| CTCF     | 0.971966   |
| CTCFLOS  | 6.370245   |
| CTDNEP1  | 0.8362925  |
| CTDP1    | 1.9551008  |
| CTDSP1   | 1.3592665  |
| CTDSP2   | 1.5026143  |
| CTH      | 1.5979183  |
| CTIF     | 2.9760664  |
| CTLA2A   | 0.8459041  |
| CTLA2B   | 1.3748109  |
| CTNNA1   | 0.36277938 |
| CTNNB1   | 0.5018203  |
| CTNNBIP1 | 0.7000134  |
| CTNNBL1  | 1.3491895  |
| CTNND1   | 0.7069824  |
| CTNS     | 2.4651606  |
| CTPS     | 1.2171195  |
| CTPS2    | 1.7648771  |
| CTR9     | 0.578336   |
| CTRC     | 0.43521428 |

|          |            |
|----------|------------|
| CTSA     | 3.6108906  |
| CTSB     | 2.491697   |
| CTSC     | 1.9482534  |
| CTSD     | 1.1964486  |
| CTSH     | 1.1721146  |
| CTSJ     | 7.9148207  |
| CTSL     | 4.292238   |
| CTSS     | 0.49677777 |
| CTSZ     | 3.0958097  |
| CTTN     | 1.8946555  |
| CTU1     | 0.71434593 |
| CTU2     | 1.8878     |
| CUL1     | 2.141806   |
| CUL2     | 2.003413   |
| CUL3     | 1.5163729  |
| CUL4A    | 2.1199105  |
| CUL4B    | 2.1736162  |
| CUL5     | 1.8070791  |
| CUL9     | 0.6642144  |
| CUTA     | 0.8960459  |
| CUTAL    | 1.2798612  |
| CUTC     | 0.97169137 |
| CWC15    | 1.6370862  |
| CWC22    | 1.5239546  |
| CWC25    | 1.5033901  |
| CWC27    | 1.9164231  |
| CWF19L2  | 1.3298595  |
| CXADR    | 1.97313    |
| CXCL1    | 6.375225   |
| CXCL10   | 5.5731926  |
| CXCL11   | 2.0318587  |
| CXCL12   | 0.9732058  |
| CXCL13   | 5.2748384  |
| CXCL16   | 0.7554281  |
| CXCL2    | 10.168644  |
| CXCL3    | 6.242814   |
| CXCL5    | 3.547005   |
| CXCL9    | 6.1391587  |
| CXXC1    | 2.0779116  |
| CXXC5    | 2.0645015  |
| CYB561   | 1.6602333  |
| CYB561D1 | 0.26319718 |
| CYB561D2 | 2.7535808  |
| CYB5A    | 1.1903651  |
| CYB5B    | 1.2951729  |



|            |            |
|------------|------------|
| CYB5D1     | 0.6619866  |
| CYB5D2     | 1.1976063  |
| CYB5R1     | 0.8816154  |
| CYB5R4     | 1.1511219  |
| CYBA       | 0.87352586 |
| CYBB       | 2.1820943  |
| CYC1       | 2.393275   |
| CYCS       | 2.8786585  |
| CYFIP1     | 1.2306454  |
| CYHR1      | 0.47299027 |
| CYLD       | 0.4584     |
| CYP17A1    | 0.60152316 |
| CYP1A2     | 5.4915733  |
| CYP1B1     | 1.9333365  |
| CYP20A1    | 0.9982183  |
| CYP27A1    | 4.1508493  |
| CYP2A12    | 6.8975544  |
| CYP2A4     | 4.670622   |
| CYP2B13    | 3.1902342  |
| CYP2C29    | 7.6084204  |
| CYP2C37    | 7.055399   |
| CYP2C38    | 4.3285236  |
| CYP2C39    | 8.757366   |
| CYP2C44    | 6.2028484  |
| CYP2C50    | 7.4812565  |
| CYP2C54    | 6.029004   |
| CYP2C67    | 5.573121   |
| CYP2C68    | 4.082613   |
| CYP2C70    | 7.4702673  |
| CYP2D10    | 10.581677  |
| CYP2D11    | 5.2740545  |
| CYP2D12    | 3.6752255  |
| CYP2D13    | 2.4246964  |
| CYP2D22    | 4.063798   |
| CYP2D26    | 9.728181   |
| CYP2D34    | 4.7728577  |
| CYP2D37-PS | 1.5645158  |
| CYP2D40    | 3.719281   |
| CYP2D9     | 4.3227987  |
| CYP2E1     | 7.420993   |
| CYP2G1     | 0.95250297 |
| CYP2J6     | 2.9645016  |
| CYP2J8     | 2.5480077  |
| CYP2R1     | 1.3321083  |
| CYP2U1     | 3.3033874  |

|          |            |
|----------|------------|
| CYP39A1  | 0.26971698 |
| CYP3A11  | 7.7958784  |
| CYP3A13  | 7.490389   |
| CYP3A16  | 7.3647976  |
| CYP3A25  | 8.477789   |
| CYP3A41B | 10.766289  |
| CYP3A44  | 3.3983743  |
| CYP3A57  | 2.190779   |
| CYP3A59  | 5.5186872  |
| CYP4A10  | 4.4000206  |
| CYP4A14  | 4.7905645  |
| CYP4A31  | 3.5861971  |
| CYP4A32  | 1.4705036  |
| CYP4F13  | 3.1496527  |
| CYP4F14  | 4.0326595  |
| CYP4F15  | 3.2169034  |
| CYP4F16  | 0.60456586 |
| CYP4F17  | 1.3163288  |
| CYP4V3   | 2.2449052  |
| CYP51    | 2.9831538  |
| CYP7A1   | 2.0230885  |
| CYP7B1   | 3.077192   |
| CYP8B1   | 1.8540895  |
| CYPT4    | 2.2521763  |
| CYTB     | 1.8087378  |
| CYTH1    | 1.7489612  |
| CYTH2    | 1.2709982  |
| CYTH4    | 0.7610991  |
| DAB2     | 0.6754265  |
| DACT2    | 2.836373   |
| DAD1     | 2.1752203  |
| DAF2     | 1.7736428  |
| DAGLB    | 0.8060925  |
| DAK      | 4.9544334  |
| DANCR    | 2.577552   |
| DAP      | 4.449462   |
| DAP3     | 2.7935536  |
| DAPK3    | 0.9683459  |
| DARS     | 0.83457637 |
| DARS2    | 1.4668612  |
| DAXX     | 1.720391   |
| DAZAP1   | 1.8933966  |
| DAZAP2   | 1.1206138  |
| DBF4     | 0.6305127  |
| DBI      | 2.6517155  |

|          |            |
|----------|------------|
| DBN1     | 2.7671406  |
| DBNDD2   | 0.67125916 |
| DBNL     | 1.2860887  |
| DBR1     | 0.9835596  |
| DBT      | 2.3403847  |
| DBX2     | 2.437096   |
| DCAF10   | 1.641247   |
| DCAF11   | 2.2046149  |
| DCAF12   | 1.3120081  |
| DCAF12L1 | 1.6462836  |
| DCAF13   | 2.1562603  |
| DCAF15   | 1.5936315  |
| DCAF17   | 1.1629567  |
| DCAF4    | 1.9269545  |
| DCAF5    | 1.5808961  |
| DCAF6    | 1.9003508  |
| DCAF7    | 0.9798236  |
| DCAF8    | 1.7004693  |
| DCAKD    | 1.3412869  |
| DCC      | 2.24556    |
| DCHS2    | 0.592536   |
| DCLRE1C  | 0.5887883  |
| DCN      | 3.232237   |
| DCP1A    | 1.0080674  |
| DCP1B    | 1.6652591  |
| DCTN1    | 0.6916611  |
| DCTN2    | 1.4346292  |
| DCTN3    | 1.4746172  |
| DCTN4    | 0.70470595 |
| DCTN5    | 0.80464387 |
| DCTN6    | 0.6306999  |
| DCTPP1   | 1.3590114  |
| DCUN1D1  | 1.2133019  |
| DCUN1D2  | 0.73710656 |
| DCUN1D4  | 1.9695146  |
| DCUN1D5  | 1.8766563  |
| DDA1     | 1.2583063  |
| DDB1     | 1.8168652  |
| DDC      | 3.4253323  |
| DDHD1    | 1.2716556  |
| DDHD2    | 0.4682386  |
| DDI2     | 3.0715535  |
| DDIT3    | 1.577719   |
| DDIT4    | 3.1628435  |
| DDO      | 0.3697827  |

|         |            |
|---------|------------|
| DDOST   | 2.0066493  |
| DDRGK1  | 2.1756465  |
| DDT     | 3.7805102  |
| DDX1    | 2.7614954  |
| DDX10   | 1.991987   |
| DDX17   | 0.71597123 |
| DDX18   | 1.4739549  |
| DDX19B  | 1.9855335  |
| DDX20   | 1.7549102  |
| DDX21   | 1.415067   |
| DDX24   | 1.731179   |
| DDX27   | 1.3764188  |
| DDX28   | 5.5980463  |
| DDX31   | 0.7447207  |
| DDX39   | 2.3815339  |
| DDX39B  | 1.6776998  |
| DDX3X   | 1.8877308  |
| DDX41   | 1.7422106  |
| DDX42   | 1.1730688  |
| DDX46   | 0.9404237  |
| DDX47   | 1.145994   |
| DDX49   | 2.4323566  |
| DDX5    | 1.1712825  |
| DDX50   | 1.8593748  |
| DDX51   | 1.2489512  |
| DDX52   | 2.1427977  |
| DDX54   | 2.1475217  |
| DDX56   | 1.3175209  |
| DDX58   | 1.3350194  |
| DDX59   | 0.62797904 |
| DDX6    | 0.9466703  |
| DDX60   | 1.7992768  |
| DEB1    | 2.1658232  |
| DECR1   | 3.3294322  |
| DECR2   | 2.9652264  |
| DEDD    | 1.3374393  |
| DEDD2   | 2.7108858  |
| DEF8    | 1.053921   |
| DEFB1   | 1.4854538  |
| DEFB15  | 0.37920356 |
| DEFB34  | 1.4906397  |
| DEGS1   | 1.4997485  |
| DEK     | 0.7019174  |
| DENND1A | 1.6942141  |
| DENND1B | 1.2167802  |

|         |            |
|---------|------------|
| DENND2D | 1.1535099  |
| DENND4A | 3.091439   |
| DENND5B | 2.0424583  |
| DENND6A | 0.62978196 |
| DENND6B | 1.3724139  |
| DENR    | 1.9379914  |
| DEPDC7  | 2.5030699  |
| DERA    | 1.9637086  |
| DERL1   | 3.0239923  |
| DERL2   | 2.7307436  |
| DERL3   | 3.2053034  |
| DESI1   | 1.9044464  |
| DESI2   | 2.565344   |
| DET1    | 1.2244103  |
| DEXI    | 1.2210791  |
| DGAT1   | 1.93662    |
| DGAT2   | 5.913329   |
| DGCR14  | 1.0704615  |
| DGCR2   | 1.314935   |
| DGCR6   | 0.3955977  |
| DGCR8   | 1.2485671  |
| DGKD    | 0.99906135 |
| DGKE    | 0.32792926 |
| DGKQ    | 1.834419   |
| DGUOK   | 0.5783212  |
| DHCR24  | 2.39275    |
| DHCR7   | 3.8447378  |
| DHDDS   | 2.201431   |
| DHDH    | 1.9780171  |
| DHODH   | 1.2819953  |
| DHPS    | 1.5103123  |
| DHRS11  | 1.4140825  |
| DHRS13  | 3.7009676  |
| DHRS4   | 3.1351745  |
| DHRS7   | 0.35836864 |
| DHRS7B  | 0.6159489  |
| DHRSX   | 2.662358   |
| DHX15   | 2.2723591  |
| DHX16   | 1.0991514  |
| DHX29   | 0.8576071  |
| DHX30   | 1.5500333  |
| DHX32   | 2.2310998  |
| DHX33   | 1.1824343  |
| DHX34   | 0.3637588  |
| DHX35   | 1.5337651  |

|         |            |
|---------|------------|
| DHX36   | 1.9230521  |
| DHX38   | 1.7334235  |
| DHX40   | 2.4084108  |
| DHX57   | 0.9655688  |
| DHX58   | 2.7309315  |
| DIABLO  | 2.2997577  |
| DIAP2   | 1.2553184  |
| DIDO1   | 0.8555505  |
| DIEXF   | 1.0461109  |
| DIMT1   | 2.0127919  |
| DIO1    | 2.7747169  |
| DIP2C   | 0.8449676  |
| DIRC2   | 0.680537   |
| DIS3    | 2.7738292  |
| DIS3L   | 1.6017187  |
| DIS3L2  | 1.4297698  |
| DKC1    | 1.4847829  |
| DLAT    | 0.87888074 |
| DLD     | 3.1049674  |
| DLG1    | 0.48784184 |
| DLGAP4  | 1.5987394  |
| DLST    | 2.5530875  |
| DLX3    | 1.2993591  |
| DMAP1   | 1.472089   |
| DMBT1   | 1.4178665  |
| DMGDH   | 11.394365  |
| DMPK    | 0.85920644 |
| DMTF1   | 2.7574294  |
| DMTN    | 3.2469823  |
| DMWD    | 2.2386248  |
| DMXL1   | 1.6033295  |
| DMXL2   | 2.1802866  |
| DNA2    | 1.3458426  |
| DNAAF2  | 0.93238926 |
| DNAH2   | 2.9430683  |
| DNAJA1  | 1.5120747  |
| DNAJA2  | 2.290993   |
| DNAJA3  | 3.903744   |
| DNAJB1  | 0.83804965 |
| DNAJB11 | 2.7407434  |
| DNAJB14 | 0.72907853 |
| DNAJB2  | 2.8621619  |
| DNAJB6  | 1.5042698  |
| DNAJB9  | 2.9744575  |
| DNAJC1  | 1.5259206  |

|          |            |
|----------|------------|
| DNAJC10  | 1.4190881  |
| DNAJC11  | 0.64927506 |
| DNAJC12  | 3.8652952  |
| DNAJC13  | 2.345771   |
| DNAJC14  | 0.95426345 |
| DNAJC15  | 2.3394015  |
| DNAJC16  | 2.4240634  |
| DNAJC18  | 1.9441521  |
| DNAJC19  | 1.7429817  |
| DNAJC2   | 1.4397709  |
| DNAJC21  | 1.8866456  |
| DNAJC22  | 4.5172405  |
| DNAJC24  | 1.3541353  |
| DNAJC25  | 3.12558    |
| DNAJC28  | 0.8607652  |
| DNAJC3   | 2.7883418  |
| DNAJC30  | 1.9629977  |
| DNAJC5   | 1.7928784  |
| DNAJC7   | 1.0290091  |
| DNAJC8   | 0.47430348 |
| DNAL4    | 0.70087695 |
| DNASE1L3 | 1.4235632  |
| DNASE2B  | 1.1625087  |
| DNLZ     | 2.5292275  |
| DNM1L    | 1.4125278  |
| DNM2     | 1.8280146  |
| DNPEP    | 2.3858802  |
| DNPH1    | 1.2038989  |
| DNTT     | 2.0544248  |
| DNTTIP1  | 1.6581933  |
| DNTTIP2  | 1.680476   |
| DOCK5    | 1.5202386  |
| DOHH     | 1.5838826  |
| DOK2     | 1.5594609  |
| DOK3     | 0.96669126 |
| DOLK     | 1.269057   |
| DOLPP1   | 1.4851148  |
| DONSON   | 2.8248866  |
| DOPEY2   | 1.906266   |
| DOS      | 1.4416316  |
| DOT1L    | 2.3372657  |
| DPAGT1   | 2.2203877  |
| DPCD     | 0.72265077 |
| DPEP3    | 1.4379025  |
| DPF2     | 1.2292187  |

|         |            |
|---------|------------|
| DPH1    | 2.5228884  |
| DPH2    | 2.11847    |
| DPH5    | 2.4643219  |
| DPH6    | 1.3482165  |
| DPH7    | 0.9525237  |
| DPM1    | 1.1560519  |
| DPM2    | 1.465442   |
| DPM3    | 1.0196974  |
| DPP10   | 0.7429776  |
| DPP3    | 2.2094247  |
| DPP6    | 2.4032567  |
| DPP7    | 2.3695142  |
| DPP8    | 0.94530416 |
| DPP9    | 3.6655304  |
| DPY19L1 | 3.5032165  |
| DPY19L2 | 0.6898751  |
| DPY30   | 1.1868675  |
| DPYD    | 5.2608957  |
| DPYSL5  | 2.9302366  |
| DR1     | 1.6433899  |
| DRAM2   | 1.1358964  |
| DRG1    | 1.9556329  |
| DRG2    | 1.93202    |
| DROSHA  | 0.8138249  |
| DSC2    | 5.935005   |
| DSCR3   | 1.6699097  |
| DSE     | 1.0033634  |
| DSG2    | 1.9347892  |
| DSN1    | 0.42273712 |
| DSP     | 0.94818044 |
| DST     | 1.503391   |
| DSTN    | 2.0316174  |
| DTD2    | 0.7764914  |
| DTNBP1  | 2.471791   |
| DTWD1   | 1.4107444  |
| DTX2    | 1.8465083  |
| DTX3    | 0.27429795 |
| DTX3L   | 1.5645335  |
| DTYMK   | 1.1427662  |
| DUOX2   | 2.169568   |
| DUOXA1  | 1.8289442  |
| DUOXA2  | 4.605796   |
| DUS1L   | 2.3909485  |
| DUS2    | 3.5824215  |
| DUS3L   | 1.3956072  |



|          |            |
|----------|------------|
| DUSP1    | 2.0091598  |
| DUSP10   | 2.4224293  |
| DUSP11   | 0.8432579  |
| DUSP12   | 2.0392115  |
| DUSP16   | 2.7781007  |
| DUSP2    | 2.9185836  |
| DUSP22   | 0.2933128  |
| DUSP28   | 0.83579135 |
| DUSP6    | 1.1703956  |
| DUSP8    | 3.10658    |
| DVL1     | 2.4581106  |
| DVL2     | 2.0887492  |
| DVL3     | 1.0193269  |
| DXO      | 2.1089923  |
| DYM      | 0.3607185  |
| DYNC1H1  | 1.7487252  |
| DYNC1I2  | 0.87790513 |
| DYNC1LI1 | 1.3066332  |
| DYNC1LI2 | 0.4392047  |
| DYNLL2   | 1.4024236  |
| DYNLRB1  | 0.8001406  |
| DYNLT1A  | 0.41869497 |
| DYNLT1C  | 0.5779145  |
| DYNLT1F  | 0.61043906 |
| DYNLT3   | 0.8799851  |
| DYRK1A   | 1.9219391  |
| DYRK2    | 1.2261467  |
| DYRK3    | 0.9629538  |
| E2F3     | 2.1450264  |
| E2F5     | 1.5612531  |
| E2F6     | 1.4228518  |
| E2F8     | 0.75925493 |
| E4F1     | 1.0068924  |
| EAF1     | 2.24146    |
| EAF2     | 4.362053   |
| EAPP     | 2.6371682  |
| EARS2    | 0.9114053  |
| EBAG9    | 2.0789354  |
| EBI3     | 1.8998406  |
| EBNA1BP2 | 1.9139946  |
| EBP      | 2.409064   |
| EBPL     | 4.008196   |
| ECD      | 1.6423118  |
| ECE2     | 3.0511854  |
| ECH1     | 2.3563917  |

|         |            |
|---------|------------|
| ECHDC2  | 3.863868   |
| ECHDC3  | 1.8909948  |
| ECHS1   | 2.791948   |
| ECI1    | 2.9777267  |
| ECI2    | 2.9492214  |
| ECI3    | 2.6396048  |
| ECM1    | 1.4832561  |
| ECSIT   | 1.8490255  |
| EDC4    | 1.5824168  |
| EDEM1   | 2.4611351  |
| EDEM2   | 2.2686174  |
| EDEM3   | 2.1823323  |
| EDF1    | 1.7500169  |
| EDN1    | 1.3983457  |
| EDRF1   | 1.4275362  |
| EEA1    | 1.5979488  |
| EED     | 1.8509519  |
| EEF1A1  | 1.9661205  |
| EEF1B2  | 2.2002904  |
| EEF1D   | 1.8786647  |
| EEF1E1  | 2.093665   |
| EEF1G   | 1.375274   |
| EEF2    | 2.3846176  |
| EEFSEC  | 1.3031318  |
| EFCAB14 | 0.7904303  |
| EFHD2   | 1.6558545  |
| EFNA1   | 3.4061358  |
| EFNA5   | 1.6080453  |
| EFR3A   | 1.2100089  |
| EFTUD1  | 1.933634   |
| EFTUD2  | 1.408354   |
| EGFR    | 5.638815   |
| EGLN2   | 1.9769394  |
| EGLN3   | 4.379937   |
| EGR1    | 4.7928314  |
| EGR2    | 1.3181565  |
| EHBP1L1 | 0.42079473 |
| EHD1    | 2.3840554  |
| EHD3    | 0.4233644  |
| EHHADH  | 4.455394   |
| EHMT1   | 3.1974237  |
| EHMT2   | 1.4244316  |
| EI24    | 2.4130862  |
| EID3    | 2.1545916  |
| EIF1    | 1.7210853  |

|           |            |
|-----------|------------|
| EIF1A     | 3.7878773  |
| EIF1AD    | 2.609092   |
| EIF1AX    | 1.8050239  |
| EIF1B     | 1.2595379  |
| EIF1-PS   | 1.7024648  |
| EIF2A     | 2.0520084  |
| EIF2AK1   | 2.0445755  |
| EIF2AK2   | 2.4135816  |
| EIF2AK3   | 2.3863156  |
| EIF2AK4   | 1.9458358  |
| EIF2B1    | 3.0600069  |
| EIF2B2    | 2.1933777  |
| EIF2B3    | 2.4126728  |
| EIF2B4    | 2.5518124  |
| EIF2B5    | 1.770016   |
| EIF2D     | 2.285834   |
| EIF2S1    | 2.170431   |
| EIF2S2    | 2.9245155  |
| EIF2S3X   | 1.654669   |
| EIF3A     | 2.228069   |
| EIF3B     | 1.8287623  |
| EIF3C     | 1.8796537  |
| EIF3D     | 2.5671117  |
| EIF3E     | 1.2327487  |
| EIF3F     | 1.452543   |
| EIF3G     | 2.3013837  |
| EIF3H     | 1.1711648  |
| EIF3I     | 1.9009788  |
| EIF3J1    | 2.2738712  |
| EIF3J2    | 1.4545853  |
| EIF3K     | 0.92032695 |
| EIF3L     | 1.6223156  |
| EIF3M     | 1.8295681  |
| EIF4A1    | 2.6982806  |
| EIF4A2    | 1.0024087  |
| EIF4A3    | 1.2922118  |
| EIF4B     | 1.7397153  |
| EIF4E     | 1.6393936  |
| EIF4E2    | 2.4997141  |
| EIF4E3    | 0.9703953  |
| EIF4EBP1  | 3.2074769  |
| EIF4EBP2  | 1.5621359  |
| EIF4EBP3  | 5.0108614  |
| EIF4ENIF1 | 1.7179396  |
| EIF4G1    | 2.940642   |

|         |            |
|---------|------------|
| EIF4G2  | 3.677982   |
| EIF4G3  | 1.534703   |
| EIF4H   | 1.3263123  |
| EIF5    | 3.022689   |
| EIF5A   | 2.3431065  |
| EIF6    | 4.082076   |
| ELAC1   | 0.47459364 |
| ELAC2   | 1.6518619  |
| ELAVL1  | 1.704746   |
| ELAVL4  | 1.8902991  |
| ELF1    | 0.6340554  |
| ELF2    | 1.4591835  |
| ELF3    | 3.4993637  |
| ELK1    | 2.0119066  |
| ELK4    | 0.7577183  |
| ELL     | 3.1884625  |
| ELL2    | 3.460871   |
| ELMO3   | 0.6467354  |
| ELMOD2  | 3.8180606  |
| ELMOD3  | 0.9523394  |
| ELOF1   | 1.0391495  |
| ELOVL2  | 9.4166355  |
| ELOVL3  | 3.675345   |
| ELOVL6  | 1.9796131  |
| ELOVL7  | 2.56822    |
| ELP2    | 0.9471481  |
| ELP3    | 1.4513075  |
| ELP4    | 0.74695206 |
| ELP5    | 1.6227281  |
| EMC1    | 0.75063515 |
| EMC2    | 1.4642684  |
| EMC3    | 1.3525975  |
| EMC4    | 1.48718    |
| EMC6    | 2.2475321  |
| EMC7    | 1.7509229  |
| EMC8    | 1.1294372  |
| EMD     | 0.9386251  |
| EME2    | 1.8203576  |
| EMG1    | 2.092376   |
| EMILIN1 | 1.341397   |
| EMILIN2 | 2.739362   |
| EML3    | 0.690099   |
| EML4    | 1.2825916  |
| EML5    | 1.5376205  |
| EML6    | 1.6517324  |

|          |            |
|----------|------------|
| EMR1     | 2.6264174  |
| EMR4     | 1.0019295  |
| ENC1     | 3.4153326  |
| ENDOG    | 3.3836992  |
| ENDOV    | 1.2460914  |
| ENGASE   | 0.4312737  |
| ENO1     | 2.306412   |
| ENO1B    | 1.9417822  |
| ENO2     | 3.4322517  |
| ENOX2    | 0.50320125 |
| ENPP3    | 5.4129343  |
| ENPP4    | 2.5450828  |
| ENSA     | 0.6989739  |
| ENTHD2   | 1.9354985  |
| ENTPD1   | 0.3768084  |
| ENTPD2   | 1.2584913  |
| ENTPD4   | 1.0080578  |
| ENTPD5   | 1.8503454  |
| ENTPD6   | 0.80285215 |
| ENTPD8   | 3.8421428  |
| ENY2     | 2.534819   |
| EP400    | 1.3025758  |
| EPB4.1   | 1.6578176  |
| EPB4.1L3 | 0.9336927  |
| EPC1     | 0.39303994 |
| EPC2     | 1.4273016  |
| EPHA1    | 3.3256123  |
| EPHA5    | 3.5640786  |
| EPHB2    | 1.5794709  |
| EPHB3    | 3.3060486  |
| EPHX1    | 0.7332065  |
| EPHX2    | 5.9157114  |
| EPN1     | 2.3921373  |
| EPPK1    | 4.726018   |
| EPRS     | 3.567166   |
| EPS15    | 1.3480003  |
| EPS15L1  | 1.1195157  |
| EPS8L3   | 2.95193    |
| EPT1     | 1.3405831  |
| ERAL1    | 1.9391854  |
| ERAP1    | 2.8053896  |
| ERBB2IP  | 1.073467   |
| ERBB3    | 0.7790406  |
| ERCC2    | 1.5613163  |
| ERCC3    | 1.5898659  |

|         |           |
|---------|-----------|
| ERCC4   | 1.0748675 |
| ERCC5   | 1.7737145 |
| ERCC6L2 | 1.164274  |
| ERCC8   | 0.8782313 |
| ERDR1   | 2.490557  |
| EREG    | 4.37996   |
| ERF     | 1.1841033 |
| ERGIC1  | 0.9626672 |
| ERGIC2  | 2.369302  |
| ERGIC3  | 0.387254  |
| ERH     | 1.853965  |
| ERI1    | 1.4087641 |
| ERI2    | 0.5449219 |
| ERI3    | 0.7806523 |
| ERICH1  | 0.3826108 |
| ERICH5  | 1.3902235 |
| ERLEC1  | 1.4138834 |
| ERLIN1  | 2.5878484 |
| ERLIN2  | 1.5425456 |
| ERMARD  | 1.0930889 |
| ERMN    | 2.122073  |
| ERMP1   | 1.3716471 |
| ERN1    | 1.2565782 |
| ERO1L   | 2.7265518 |
| ERO1LB  | 3.742699  |
| ERP29   | 2.7419522 |
| ERP44   | 1.1441548 |
| ERRFI1  | 5.1740174 |
| ESCO1   | 1.4209354 |
| ESD     | 2.315162  |
| ESF1    | 1.9982474 |
| ESR1    | 1.0306454 |
| ESR2    | 1.4923503 |
| ESRP2   | 2.4619415 |
| ESRRA   | 2.3877485 |
| ETF1    | 2.7532718 |
| ETFA    | 3.1691215 |
| ETFB    | 2.6581008 |
| ETFDH   | 3.8698895 |
| ETHE1   | 1.7350094 |
| ETNK1   | 0.7780318 |
| ETNK2   | 6.6645546 |
| ETNPPL  | 5.9576473 |
| ETS2    | 2.9088638 |
| ETV3    | 1.0540404 |

|         |            |
|---------|------------|
| ETV4    | 0.640491   |
| ETV6    | 2.814864   |
| EVA1A   | 3.81306    |
| EVI5    | 1.480335   |
| EVI5L   | 0.8560431  |
| EVL     | 0.6178944  |
| EWSR1   | 0.68327165 |
| EXD1    | 2.8023937  |
| EXD2    | 1.1962306  |
| EXO5    | 0.48991466 |
| EXOC1   | 0.7111676  |
| EXOC2   | 0.95939183 |
| EXOC3   | 0.5224793  |
| EXOC3L4 | 0.83367133 |
| EXOC5   | 1.3807342  |
| EXOC6   | 1.2468936  |
| EXOC6B  | 1.8415802  |
| EXOC7   | 1.1143882  |
| EXOSC1  | 1.0742586  |
| EXOSC10 | 0.32579732 |
| EXOSC2  | 2.2365894  |
| EXOSC3  | 2.1381347  |
| EXOSC4  | 2.6872747  |
| EXOSC5  | 1.5516851  |
| EXOSC6  | 1.3667052  |
| EXOSC7  | 0.6018269  |
| EXOSC8  | 0.53102994 |
| EXOSC9  | 3.4310505  |
| EXT1    | 1.5141618  |
| EXTL1   | 1.7439876  |
| EXTL2   | 1.8224671  |
| EXTL3   | 1.1255543  |
| EYA1    | 3.5262702  |
| EYA3    | 2.3570597  |
| EZH1    | 0.87789655 |
| EZH2    | 0.99845886 |
| F10     | 6.367607   |
| F11     | 8.4922495  |
| F11R    | 1.9892647  |
| F12     | 12.398761  |
| F13B    | 9.064068   |
| F2      | 10.92795   |
| F5      | 4.538271   |
| F7      | 3.4095504  |
| F9      | 3.6609108  |

|          |            |
|----------|------------|
| FABP1    | 5.347333   |
| FABP2    | 4.419382   |
| FABP4    | 2.9735582  |
| FABP5    | 0.30802703 |
| FABP7    | 4.898073   |
| FADS1    | 0.88881946 |
| FADS2    | 1.6980114  |
| FAF1     | 1.551254   |
| FAF2     | 3.0687215  |
| FAH      | 4.496276   |
| FAHD1    | 1.2186162  |
| FAHD2A   | 1.2427447  |
| FAIM     | 1.2665002  |
| FAM102A  | 0.51628804 |
| FAM107B  | 0.52494645 |
| FAM114A1 | 3.0533087  |
| FAM114A2 | 1.1480515  |
| FAM115A  | 0.40516496 |
| FAM117B  | 0.36130548 |
| FAM118A  | 2.3330452  |
| FAM118B  | 1.1887882  |
| FAM120A  | 1.7178161  |
| FAM122A  | 1.429281   |
| FAM126B  | 0.43603253 |
| FAM133B  | 0.35331225 |
| FAM134A  | 2.8072097  |
| FAM134B  | 4.4752455  |
| FAM134C  | 1.1081212  |
| FAM135A  | 2.7861984  |
| FAM136A  | 3.1019747  |
| FAM13B   | 0.5387542  |
| FAM151B  | 0.6198275  |
| FAM160A2 | 2.4078276  |
| FAM160B1 | 1.3836138  |
| FAM160B2 | 3.072448   |
| FAM162A  | 3.1370866  |
| FAM167B  | 3.2607782  |
| FAM168A  | 0.36849093 |
| FAM168B  | 1.0742404  |
| FAM169B  | 4.6247725  |
| FAM172A  | 1.4768021  |
| FAM173A  | 1.0500357  |
| FAM173B  | 1.9870732  |
| FAM174A  | 0.7311013  |
| FAM178A  | 3.0216577  |



|         |            |
|---------|------------|
| FAM179B | 0.8416016  |
| FAM185A | 2.441533   |
| FAM187B | 3.6261528  |
| FAM188A | 1.5171177  |
| FAM192A | 1.5520895  |
| FAM193A | 1.2074606  |
| FAM193B | 0.92283654 |
| FAM195A | 2.499284   |
| FAM195B | 0.7898972  |
| FAM199X | 2.681633   |
| FAM19A2 | 3.962965   |
| FAM203A | 1.5655024  |
| FAM204A | 1.1422944  |
| FAM206A | 0.51781154 |
| FAM207A | 1.4924448  |
| FAM208A | 1.309377   |
| FAM208B | 1.8626969  |
| FAM20A  | 2.833769   |
| FAM20C  | 1.7282574  |
| FAM21   | 2.5513752  |
| FAM210A | 1.6591504  |
| FAM210B | 1.3882811  |
| FAM213A | 3.084758   |
| FAM213B | 0.5118387  |
| FAM214A | 0.95622754 |
| FAM214B | 1.5049846  |
| FAM219A | 3.0374782  |
| FAM220A | 0.51981044 |
| FAM222A | 3.1604683  |
| FAM26F  | 3.1224787  |
| FAM32A  | 1.3355005  |
| FAM35A  | 1.6841483  |
| FAM3A   | 0.5323646  |
| FAM3C   | 1.261286   |
| FAM43A  | 0.45658946 |
| FAM45A  | 1.394975   |
| FAM46A  | 2.8239324  |
| FAM50A  | 2.9332392  |
| FAM53A  | 1.4509151  |
| FAM53C  | 1.9043858  |
| FAM58B  | 1.1437237  |
| FAM63A  | 1.6431391  |
| FAM63B  | 1.0508401  |
| FAM71D  | 2.3207045  |
| FAM71E1 | 0.9400494  |

|          |            |
|----------|------------|
| FAM71F2  | 1.2480843  |
| FAM73A   | 0.5886376  |
| FAM73B   | 1.6578367  |
| FAM76A   | 1.2555082  |
| FAM76B   | 1.0319788  |
| FAM83F   | 0.85349154 |
| FAM83G   | 1.4926741  |
| FAM83H   | 2.5097     |
| FAM86    | 1.4264281  |
| FAM92A   | 2.8214333  |
| FAM96A   | 2.3068721  |
| FAM96B   | 2.207248   |
| FAM98A   | 1.9575632  |
| FAM98B   | 1.2217135  |
| FAM98C   | 0.91776586 |
| FANCC    | 1.8576386  |
| FANCE    | 1.4715402  |
| FANCF    | 2.337866   |
| FANCL    | 1.3634427  |
| FANCM    | 1.1080596  |
| FAP      | 1.123755   |
| FARP1    | 1.1076205  |
| FARP2    | 2.4276512  |
| FARS2    | 2.2889879  |
| FARSA    | 1.4205492  |
| FARSB    | 2.3253915  |
| FAS      | 2.8146784  |
| FASTK    | 1.7990491  |
| FASTKD1  | 2.600178   |
| FASTKD3  | 2.788514   |
| FASTKD5  | 2.4315202  |
| FAT1     | 1.1747439  |
| FAU      | 1.9947548  |
| FBL      | 2.060249   |
| FBP1     | 9.97539    |
| FBRS     | 0.9198966  |
| FBRS1    | 1.0429466  |
| FBXL12   | 1.3164041  |
| FBXL12OS | 2.378051   |
| FBXL14   | 0.67246604 |
| FBXL15   | 2.0926034  |
| FBXL17   | 1.3834083  |
| FBXL18   | 1.4815068  |
| FBXL19   | 0.3119533  |
| FBXL3    | 1.0734451  |

|         |            |
|---------|------------|
| FBXL4   | 1.189194   |
| FBXL5   | 2.0653226  |
| FBXL6   | 1.0586007  |
| FBXL8   | 0.57792234 |
| FBXO11  | 0.92210317 |
| FBXO18  | 0.7926152  |
| FBXO21  | 1.1685951  |
| FBXO22  | 1.7462947  |
| FBXO3   | 1.0894091  |
| FBXO30  | 0.74056363 |
| FBXO31  | 4.513278   |
| FBXO33  | 0.9740169  |
| FBXO34  | 1.2000425  |
| FBXO38  | 1.6781299  |
| FBXO4   | 1.9308155  |
| FBXO42  | 2.4914405  |
| FBXO46  | 1.3618119  |
| FBXO6   | 3.7179606  |
| FBXO7   | 1.8594358  |
| FBXO8   | 2.1454456  |
| FBXO9   | 1.4282153  |
| FBXW11  | 1.8807557  |
| FBXW17  | 0.75037694 |
| FBXW4   | 1.2308233  |
| FBXW5   | 2.072347   |
| FBXW7   | 0.37753844 |
| FBXW8   | 0.7138264  |
| FBXW9   | 1.7033827  |
| FCER1G  | 1.8337753  |
| FCF1    | 1.6950428  |
| FCGR1   | 0.58020186 |
| FCGR2B  | 2.467879   |
| FCGR3   | 1.76671    |
| FCGR4   | 1.3164728  |
| FCGRT   | 0.7114465  |
| FCHSD1  | 1.4482114  |
| FCHSD2  | 2.3444088  |
| FCNA    | 4.114485   |
| FCRL5   | 0.9772055  |
| FDFT1   | 2.5083945  |
| FDPS    | 3.092683   |
| FDX1    | 1.4818704  |
| FDX1L   | 1.9247172  |
| FDXACB1 | 1.9163649  |
| FDXR    | 0.8016932  |

|          |            |
|----------|------------|
| FECH     | 0.93383193 |
| FEM1A    | 1.8584425  |
| FEM1B    | 0.45315862 |
| FEM1C    | 1.7693679  |
| FEN1     | 1.1001112  |
| FERMT2   | 0.9751532  |
| FERMT3   | 1.229676   |
| FERT2    | 1.9956591  |
| FETUB    | 8.128246   |
| FEZ2     | 1.5303051  |
| FEZF2    | 0.86075354 |
| FGA      | 9.173074   |
| FGB      | 9.663299   |
| FGD4     | 1.7249825  |
| FGF21    | 6.048996   |
| FGF23    | 1.1005595  |
| FGFR1OP  | 1.6322367  |
| FGFR1OP2 | 0.6282642  |
| FGFR2    | 0.5437572  |
| FGFRL1   | 1.7719676  |
| FGG      | 10.698914  |
| FGGY     | 0.6570842  |
| FGL1     | 10.607961  |
| FGL2     | 0.7316201  |
| FGR      | 0.8231394  |
| FH1      | 4.7726097  |
| FHL3     | 0.7099397  |
| FIBP     | 0.9415505  |
| FIGNL2   | 1.4510999  |
| FIP1L1   | 1.7195871  |
| FIS1     | 1.5829175  |
| FITM2    | 1.8346059  |
| FKBP1A   | 1.3964064  |
| FKBP2    | 2.423466   |
| FKBP3    | 1.1432254  |
| FKBP5    | 3.2987092  |
| FKBP8    | 2.5948503  |
| FKBPL    | 0.4793861  |
| FKRP     | 1.8713415  |
| FLAD1    | 3.3471067  |
| FLCN     | 2.7167408  |
| FLNB     | 1.6539505  |
| FLOT1    | 2.2800238  |
| FLOT2    | 2.1586225  |
| FLYWCH1  | 0.51705766 |

|          |            |
|----------|------------|
| FMNL2    | 0.48836994 |
| FMO4     | 4.1142626  |
| FMO5     | 2.6072586  |
| FMR1     | 1.0755551  |
| FN1      | 3.496521   |
| FN3KRP   | 0.45072365 |
| FNBP1    | 1.2782681  |
| FNBP4    | 1.315593   |
| FNDC3A   | 2.3424027  |
| FNDC3B   | 3.4231164  |
| FNDC4    | 5.1374073  |
| FNIP1    | 2.71297    |
| FNIP2    | 2.2011745  |
| FNTA     | 0.78771806 |
| FOCAD    | 2.2400196  |
| FOLH1    | 1.7909575  |
| FOPNL    | 1.0461085  |
| FOS      | 1.4654324  |
| FOSL1    | 4.559128   |
| FOSL2    | 0.41616464 |
| FOXA1    | 0.34364104 |
| FOXA3    | 6.658639   |
| FOXC2    | 1.4060923  |
| FOXJ3    | 1.0584295  |
| FOXK1    | 0.7548454  |
| FOXK2    | 1.205353   |
| FOXL2    | 2.1293223  |
| FOXN2    | 1.0951865  |
| FOXN3    | 0.38025475 |
| FOXO1    | 1.6384065  |
| FOXP4    | 1.7485197  |
| FOXQ1    | 2.4284866  |
| FOXRED1  | 2.40999    |
| FPGS     | 3.9653041  |
| FPGT     | 2.003174   |
| FPR1     | 2.0231125  |
| FPR2     | 2.650594   |
| FPR3     | 4.8898745  |
| FRA10AC1 | 2.723912   |
| FRAT1    | 2.0004718  |
| FRG1     | 0.7897389  |
| FRMD4B   | 1.0466228  |
| FRMD8    | 0.6374295  |
| FRMD8OS  | 1.7364154  |
| FRRS1    | 3.280019   |

|            |            |
|------------|------------|
| FRS2       | 1.3791001  |
| FRYL       | 2.41069    |
| FRZB       | 3.9842904  |
| FSCN1      | 1.7838767  |
| FST        | 5.615451   |
| FTCD       | 8.865858   |
| FTH1       | 2.606474   |
| FTL1       | 1.8939514  |
| FTSJ1      | 2.1239173  |
| FTSJ3      | 2.3186066  |
| FUBP3      | 1.6656334  |
| FUCA1      | 0.7464211  |
| FUK        | 1.3262713  |
| FUNDC1     | 0.8658993  |
| FUNDC2     | 0.98107743 |
| FUOM       | 3.0601285  |
| FURIN      | 2.293762   |
| FXN        | 0.642534   |
| FXR1       | 2.185891   |
| FXR2       | 1.9495056  |
| FXYD1      | 2.0771472  |
| FYB        | 1.4813378  |
| FZD4       | 0.37319493 |
| FZD9       | 0.86435556 |
| FZR1       | 1.1863534  |
| G3BP1      | 2.265917   |
| G3BP2      | 1.8445618  |
| G6PC       | 7.3997917  |
| G6PDX      | 0.8005941  |
| GAA        | 1.8160326  |
| GAB1       | 0.4916122  |
| GAB3       | 2.4071777  |
| GABARAP    | 2.5221527  |
| GABARAPL1  | 2.3334434  |
| GABARAPL2  | 1.999809   |
| GABBR2     | 0.5601287  |
| GABPA      | 1.9974186  |
| GABPB1     | 1.1157072  |
| GABPB2     | 0.7153194  |
| GABRR1     | 1.3453147  |
| GADD45B    | 1.635153   |
| GADD45G    | 5.0261617  |
| GADD45GIP1 | 2.4086616  |
| GAK        | 1.8508642  |
| GALE       | 2.6963456  |

|         |            |
|---------|------------|
| GALK1   | 1.8525264  |
| GALK2   | 1.3710387  |
| GALNS   | 1.8792107  |
| GALNT1  | 0.43646598 |
| GALNT10 | 0.50089145 |
| GALNT11 | 1.1652167  |
| GALNT2  | 1.1511195  |
| GALNT4  | 0.8696859  |
| GALNT7  | 1.4091823  |
| GAMT    | 0.7879112  |
| GAN     | 0.7753458  |
| GANAB   | 2.7512815  |
| GANC    | 0.842026   |
| GAPDH   | 3.1713672  |
| GAPVD1  | 1.6210129  |
| GAR1    | 2.3851998  |
| GAREM   | 5.509163   |
| GARS    | 2.3941896  |
| GART    | 0.78237915 |
| GAS2    | 2.0302749  |
| GAS2L1  | 1.3211024  |
| GAS2L3  | 0.8781557  |
| GAS5    | 2.276758   |
| GAS6    | 0.9676988  |
| GAS8    | 0.8604615  |
| GATA4   | 3.253361   |
| GATA5   | 1.664952   |
| GATA6   | 1.0458128  |
| GATAD1  | 0.9681585  |
| GATAD2B | 0.47055125 |
| GATC    | 1.113698   |
| GATM    | 0.871732   |
| GBA     | 4.0051527  |
| GBA2    | 0.37561297 |
| GBAS    | 0.5175953  |
| GBE1    | 3.0248988  |
| GBP10   | 1.964009   |
| GBP11   | 4.2173767  |
| GBP2    | 2.9137022  |
| GBP2B   | 2.904524   |
| GBP3    | 3.2754643  |
| GBP4    | 0.9987099  |
| GBP5    | 3.4932168  |
| GBP6    | 4.0114565  |
| GBP7    | 2.648053   |

|         |            |
|---------|------------|
| GBP8    | 1.2710955  |
| GBP9    | 2.523854   |
| GC      | 10.400085  |
| GCAT    | 3.6676872  |
| GCC1    | 1.1487117  |
| GCC2    | 2.0520318  |
| GCDH    | 5.6809826  |
| GCFC2   | 1.5029192  |
| GCGR    | 5.146325   |
| GCH1    | 5.000861   |
| GCHFR   | 3.0887344  |
| GCKR    | 9.840805   |
| GCLC    | 2.0960224  |
| GCLM    | 2.0708835  |
| GCM1    | 1.2294447  |
| GCN1L1  | 1.4976404  |
| GCNT2   | 1.3930857  |
| GCSH    | 1.7809708  |
| GDA     | 1.0462921  |
| GDAP10  | 3.4851153  |
| GDAP1L1 | 0.96990585 |
| GDAP2   | 2.6873071  |
| GDE1    | 1.7830737  |
| GDF15   | 6.4270935  |
| GDF2    | 3.0460265  |
| GDI1    | 0.8511579  |
| GDI2    | 1.5346463  |
| GDPGP1  | 1.0564387  |
| GEM     | 0.84222436 |
| GEMIN5  | 1.4151871  |
| GEMIN6  | 1.8432384  |
| GEMIN7  | 0.5805447  |
| GEMIN8  | 2.0631063  |
| GET4    | 0.8342221  |
| GFER    | 3.3600214  |
| GFM1    | 2.9884522  |
| GFM2    | 2.1000192  |
| GFOD2   | 0.9603045  |
| GFPT1   | 1.7110035  |
| GFRA1   | 4.4549656  |
| GFRA4   | 0.5822146  |
| GGA1    | 1.2291224  |
| GGA2    | 1.7360284  |
| GGA3    | 1.2034194  |
| GGACT   | 1.1365225  |



|        |            |
|--------|------------|
| GGCT   | 2.2147443  |
| GGCX   | 1.9317863  |
| GGH    | 0.69602656 |
| GGNBP2 | 1.920718   |
| GGPS1  | 0.48019004 |
| GGT6   | 4.7603273  |
| GHDC   | 1.731714   |
| GHITM  | 3.0947793  |
| GHR    | 1.3377254  |
| GID4   | 0.38418126 |
| GID8   | 1.5743778  |
| GIGYF1 | 1.6004527  |
| GIGYF2 | 1.819598   |
| GIMAP9 | 1.9128978  |
| GIN1   | 1.7134981  |
| GINM1  | 1.9778192  |
| GINS1  | 1.046993   |
| GINS4  | 0.5148914  |
| GIPC1  | 1.2503436  |
| GIT1   | 0.8678715  |
| GIT2   | 0.7427347  |
| GJA1   | 1.3422887  |
| GJA4   | 1.1672027  |
| GJB1   | 4.216982   |
| GJB2   | 8.530104   |
| GJB4   | 2.129413   |
| GJC3   | 1.8870319  |
| GKAP1  | 1.580528   |
| GKN3   | 0.6931789  |
| GLA    | 1.4329603  |
| GLB1   | 0.38072085 |
| GLCE   | 3.4616945  |
| GLDC   | 5.863675   |
| GLE1   | 0.84563184 |
| GLG1   | 1.4301364  |
| GLIPR2 | 2.042092   |
| GLMN   | 1.0999787  |
| GLO1   | 2.5004895  |
| GLOD4  | 1.4504302  |
| GLOD5  | 1.1152077  |
| GLRX   | 2.959205   |
| GLRX2  | 2.185688   |
| GLRX3  | 1.8272059  |
| GLRX5  | 2.010318   |
| GLS2   | 4.278488   |

|         |            |
|---------|------------|
| GLT1D1  | 3.07106    |
| GLT25D1 | 2.192146   |
| GLT8D1  | 1.1507266  |
| GLTPD1  | 1.8811066  |
| GLTPD2  | 8.957153   |
| GLTSCR2 | 1.1699827  |
| GLUD1   | 1.5468867  |
| GLUL    | 1.4650624  |
| GLYAT   | 3.5042036  |
| GLYCTK  | 4.46241    |
| GLYR1   | 1.8038123  |
| GM10015 | 1.9318197  |
| GM10065 | 1.1956446  |
| GM10094 | 1.4464543  |
| GM10101 | 1.0064087  |
| GM10134 | 0.4264741  |
| GM10142 | 1.8298752  |
| GM10228 | 3.0865967  |
| GM10257 | 0.50515866 |
| GM10272 | 0.8398342  |
| GM10318 | 0.3977034  |
| GM10324 | 0.9881189  |
| GM10387 | 2.290199   |
| GM10405 | 3.1046216  |
| GM10420 | 1.7930298  |
| GM10425 | 1.3755732  |
| GM10461 | 1.3805516  |
| GM10631 | 1.2674067  |
| GM10634 | 2.0032618  |
| GM10639 | 0.77342033 |
| GM10640 | 1.7683427  |
| GM10653 | 1.9789107  |
| GM10658 | 5.3624616  |
| GM10680 | 4.1029253  |
| GM10693 | 1.5149462  |
| GM10696 | 2.449503   |
| GM10731 | 0.80546737 |
| GM10734 | 3.0689528  |
| GM10765 | 1.551122   |
| GM10767 | 1.1910722  |
| GM10768 | 8.932667   |
| GM10791 | 1.0014286  |
| GM10796 | 1.1556745  |
| GM10827 | 3.45801    |
| GM10839 | 2.255702   |

|         |            |
|---------|------------|
| GM10845 | 1.7061346  |
| GM10851 | 1.4249644  |
| GM10856 | 1.5061033  |
| GM10872 | 4.6514893  |
| GM10910 | 1.4512558  |
| GM10914 | 2.279069   |
| GM11033 | 6.0114737  |
| GM11127 | 1.695791   |
| GM11213 | 0.37666106 |
| GM11240 | 1.5291278  |
| GM11449 | 1.23792    |
| GM11559 | 1.0100117  |
| GM11564 | 1.3952012  |
| GM11783 | 1.6864743  |
| GM11810 | 1.09218    |
| GM11974 | 2.4308803  |
| GM12060 | 2.7112243  |
| GM12070 | 3.0434499  |
| GM12216 | 0.7553103  |
| GM12247 | 2.206135   |
| GM12250 | 0.48244452 |
| GM12271 | 0.46896672 |
| GM12447 | 1.5817869  |
| GM12503 | 2.5354025  |
| GM12508 | 1.8559859  |
| GM12618 | 1.8542788  |
| GM12620 | 2.4188645  |
| GM12693 | 1.4558809  |
| GM12758 | 2.2942748  |
| GM12816 | 1.7517252  |
| GM12942 | 0.94186616 |
| GM13023 | 0.4353764  |
| GM1305  | 2.4072182  |
| GM13194 | 0.90471673 |
| GM13202 | 2.5043561  |
| GM13215 | 1.4863694  |
| GM13238 | 2.0763798  |
| GM13315 | 3.8618124  |
| GM13570 | 1.7721415  |
| GM13770 | 1.5684121  |
| GM13777 | 1.4642718  |
| GM13826 | 1.328434   |
| GM13889 | 0.6469033  |
| GM13931 | 1.2897925  |
| GM14010 | 2.3641677  |

|         |            |
|---------|------------|
| GM14135 | 0.91986585 |
| GM14288 | 1.553335   |
| GM14322 | 1.4795372  |
| GM14325 | 0.8918946  |
| GM14326 | 1.1213238  |
| GM14347 | 1.5836813  |
| GM14391 | 1.1055682  |
| GM14393 | 0.72846484 |
| GM14410 | 1.2703006  |
| GM14420 | 0.9647777  |
| GM14431 | 1.9598558  |
| GM14432 | 1.5265653  |
| GM14440 | 1.9014413  |
| GM14443 | 1.4296949  |
| GM14548 | 1.4676912  |
| GM14858 | 1.647022   |
| GM15032 | 1.2275159  |
| GM15056 | 2.919223   |
| GM15340 | 1.2582107  |
| GM15348 | 2.1444285  |
| GM15421 | 2.4677665  |
| GM15466 | 0.743541   |
| GM15520 | 2.6768217  |
| GM15645 | 2.3110268  |
| GM15760 | 1.5447452  |
| GM15772 | 1.7310545  |
| GM15998 | 3.264672   |
| GM16062 | 0.6856656  |
| GM16340 | 2.05248    |
| GM16381 | 1.0392048  |
| GM16386 | 0.61167264 |
| GM16515 | 0.6513765  |
| GM16525 | 0.95906353 |
| GM16853 | 1.9216456  |
| GM17748 | 0.60481095 |
| GM17757 | 1.5870721  |
| GM17764 | 1.3504016  |
| GM17821 | 2.4573796  |
| GM1943  | 0.70225334 |
| GM19840 | 1.1866062  |
| GM20056 | 0.360708   |
| GM2016  | 3.4822538  |
| GM20746 | 1.8728349  |
| GM20764 | 0.73789287 |
| GM2085  | 1.0552711  |

|         |            |
|---------|------------|
| GM2099  | 0.6496484  |
| GM2138  | 1.2840021  |
| GM21559 | 0.43176532 |
| GM21944 | 1.2849357  |
| GM2347  | 0.81142306 |
| GM2379  | 2.1670516  |
| GM2382  | 2.1079166  |
| GM2436  | 2.11402    |
| GM2518  | 0.94560266 |
| GM2590  | 1.2061212  |
| GM2696  | 0.7668059  |
| GM2701  | 0.93432045 |
| GM2814  | 3.02829    |
| GM2848  | 1.6810634  |
| GM3161  | 1.3276432  |
| GM3219  | 0.81706953 |
| GM3239  | 0.8348186  |
| GM3258  | 0.89197946 |
| GM3285  | 1.4066846  |
| GM3289  | 3.2630908  |
| GM3367  | 1.2717168  |
| GM3383  | 0.59740543 |
| GM3404  | 1.9594805  |
| GM3414  | 1.5948477  |
| GM3448  | 2.0112164  |
| GM3455  | 0.29885387 |
| GM3556  | 1.9573376  |
| GM3776  | 1.7480161  |
| GM3805  | 1.3361838  |
| GM3893  | 0.89507484 |
| GM4117  | 4.278537   |
| GM4123  | 2.3859293  |
| GM4130  | 1.2193921  |
| GM4342  | 1.2445061  |
| GM4349  | 0.64825916 |
| GM4402  | 2.1327193  |
| GM4470  | 1.1936114  |
| GM4473  | 0.94779396 |
| GM4673  | 1.2923112  |
| GM4786  | 1.7219317  |
| GM4788  | 5.0936737  |
| GM4802  | 1.8652723  |
| GM4832  | 1.518327   |
| GM4841  | 3.984388   |
| GM4858  | 0.9480424  |

|        |            |
|--------|------------|
| GM4861 | 2.148243   |
| GM4862 | 1.4986936  |
| GM4889 | 1.2113893  |
| GM4910 | 2.7905653  |
| GM4943 | 1.6293757  |
| GM4944 | 0.44433093 |
| GM4951 | 4.883046   |
| GM4952 | 5.4983006  |
| GM4963 | 1.6731522  |
| GM4971 | 2.477      |
| GM4997 | 2.2769413  |
| GM5039 | 1.7399857  |
| GM5067 | 2.9396577  |
| GM5068 | 1.0155275  |
| GM5069 | 3.1469724  |
| GM5079 | 0.7746346  |
| GM5093 | 0.42840958 |
| GM5114 | 1.8793416  |
| GM5115 | 1.4441149  |
| GM5136 | 1.5221226  |
| GM5176 | 1.8184903  |
| GM5396 | 1.5748079  |
| GM5431 | 1.5439456  |
| GM5445 | 1.2996604  |
| GM5453 | 1.5972707  |
| GM5481 | 0.8746207  |
| GM5483 | 1.561239   |
| GM5523 | 2.9308681  |
| GM5528 | 0.6157968  |
| GM5544 | 2.4858382  |
| GM5595 | 0.5881932  |
| GM561  | 1.3085048  |
| GM5617 | 1.5011394  |
| GM5637 | 3.261284   |
| GM5643 | 1.0614088  |
| GM5766 | 2.1833107  |
| GM5767 | 0.58048916 |
| GM5779 | 0.95214677 |
| GM5785 | 2.5390823  |
| GM5801 | 1.3537128  |
| GM5848 | 0.8456085  |
| GM5858 | 0.27958608 |
| GM5878 | 0.8289139  |
| GM5879 | 1.389199   |
| GM5908 | 2.1824806  |

|        |            |
|--------|------------|
| GM6109 | 1.5221016  |
| GM6115 | 1.4962733  |
| GM6155 | 1.43941    |
| GM6195 | 0.5092733  |
| GM6211 | 1.950546   |
| GM6238 | 2.1119754  |
| GM6251 | 1.2717874  |
| GM6252 | 1.974397   |
| GM626  | 3.4151728  |
| GM6328 | 2.159418   |
| GM6377 | 2.683047   |
| GM6402 | 0.583776   |
| GM6403 | 3.3596563  |
| GM6404 | 1.4420812  |
| GM6444 | 1.1324155  |
| GM6498 | 2.2847035  |
| GM6524 | 2.2708957  |
| GM6525 | 1.4846132  |
| GM6548 | 1.9992387  |
| GM6570 | 1.3996456  |
| GM6578 | 2.0611017  |
| GM6579 | 1.2817461  |
| GM6583 | 1.3771482  |
| GM6607 | 2.0221236  |
| GM6625 | 0.50225234 |
| GM6658 | 1.4258604  |
| GM6710 | 1.707876   |
| GM6921 | 0.48927808 |
| GM6934 | 0.81167245 |
| GM6981 | 3.0324633  |
| GM6987 | 1.1613088  |
| GM6994 | 3.4554307  |
| GM7111 | 2.0888762  |
| GM7120 | 2.1699598  |
| GM7160 | 1.2651048  |
| GM7241 | 1.5993145  |
| GM7265 | 1.4730752  |
| GM7337 | 3.0192006  |
| GM7555 | 1.1659052  |
| GM7634 | 1.4211366  |
| GM7664 | 1.2805498  |
| GM7694 | 1.757307   |
| GM7967 | 2.4168499  |
| GM8210 | 0.81627584 |
| GM8437 | 1.6632657  |

|        |            |
|--------|------------|
| GM8526 | 0.55636907 |
| GM8556 | 1.1069634  |
| GM8580 | 2.136594   |
| GM8675 | 0.7330451  |
| GM8709 | 3.4090278  |
| GM8738 | 2.837961   |
| GM8801 | 1.2411788  |
| GM8883 | 3.6651633  |
| GM8884 | 1.7453041  |
| GM8909 | 3.3594162  |
| GM8994 | 2.4375365  |
| GM8995 | 0.69957185 |
| GM9049 | 1.1177075  |
| GM9079 | 2.3946025  |
| GM9178 | 2.8120134  |
| GM9234 | 1.5204055  |
| GM9385 | 1.9457042  |
| GM9456 | 2.3518136  |
| GM9457 | 1.843477   |
| GM9706 | 3.8641264  |
| GM9725 | 2.6383488  |
| GM9731 | 1.1774852  |
| GM9757 | 0.75123763 |
| GM9802 | 1.1010652  |
| GM9855 | 2.0230746  |
| GM9861 | 1.8071618  |
| GM9883 | 0.89294755 |
| GM9889 | 1.3227174  |
| GM9895 | 2.1775775  |
| GM9920 | 1.3709323  |
| GM9975 | 1.094459   |
| GMCL1  | 1.4823487  |
| GMDS   | 1.620465   |
| GMEB1  | 0.9892893  |
| GMEB2  | 1.6303895  |
| GMFB   | 0.34906602 |
| GMFG   | 0.6218965  |
| GMIP   | 0.49348378 |
| GMPPA  | 2.3164408  |
| GMPPB  | 2.7896593  |
| GMPR2  | 1.3240826  |
| GMPS   | 1.2158296  |
| GNA11  | 0.59110856 |
| GNA12  | 0.79606795 |
| GNA13  | 2.1331704  |



|         |            |
|---------|------------|
| GNAI3   | 2.2496998  |
| GNAS    | 1.0551617  |
| GNAT1   | 6.68956    |
| GNB1L   | 0.888855   |
| GNB2    | 1.6527641  |
| GNB2L1  | 1.8833714  |
| GNE     | 2.849488   |
| GNG12   | 2.7453077  |
| GNG5    | 1.6354086  |
| GNL1    | 0.86484647 |
| GNL2    | 2.8740222  |
| GNL3    | 3.3636696  |
| GNL3L   | 0.59571385 |
| GNMT    | 4.9071064  |
| GNPAT   | 1.1737969  |
| GNPDA1  | 1.771146   |
| GNPNAT1 | 2.6701462  |
| GNPTAB  | 0.35464406 |
| GNPTG   | 1.4206054  |
| GNS     | 2.1183531  |
| GOLGA1  | 1.9634507  |
| GOLGA2  | 1.4117582  |
| GOLGA3  | 2.5906265  |
| GOLGA4  | 2.4197214  |
| GOLGA5  | 2.8461263  |
| GOLGA7  | 1.4482515  |
| GOLGA7B | 2.5719988  |
| GOLGB1  | 2.8867614  |
| GOLIM4  | 1.9489548  |
| GOLM1   | 1.1245229  |
| GOLPH3  | 2.3138764  |
| GOLPH3L | 0.370929   |
| GOLT1B  | 0.7528405  |
| GOPC    | 1.649843   |
| GORAB   | 1.530968   |
| GORASP1 | 2.1309621  |
| GORASP2 | 1.401943   |
| GOSR1   | 1.4200723  |
| GOSR2   | 1.6343853  |
| GOT1    | 6.747291   |
| GOT2    | 2.7400453  |
| GP49A   | 2.0913026  |
| GPAA1   | 1.7183118  |
| GPALPP1 | 0.8692477  |
| GPATCH1 | 0.81735015 |

|          |            |
|----------|------------|
| GPATCH11 | 1.8499286  |
| GPATCH2  | 1.4506657  |
| GPATCH2L | 1.5281484  |
| GPATCH3  | 1.3412285  |
| GPATCH8  | 0.8540833  |
| GPBP1    | 1.7878292  |
| GPBP1L1  | 0.9357455  |
| GPC4     | 2.9070504  |
| GPCPD1   | 4.0038986  |
| GPD1     | 0.94979167 |
| GPD2     | 2.2267916  |
| GPHB5    | 1.0259128  |
| GPHN     | 2.9933221  |
| GPI1     | 2.321849   |
| GPKOW    | 1.2493966  |
| GPN1     | 0.9308326  |
| GPN2     | 1.4687498  |
| GPN3     | 1.0136778  |
| GPR107   | 1.4189904  |
| GPR108   | 0.57527375 |
| GPR110   | 0.50026965 |
| GPR137   | 1.4585869  |
| GPR146   | 1.828047   |
| GPR157   | 1.7564199  |
| GPR171   | 0.8358259  |
| GPR18    | 1.1035018  |
| GPR19    | 1.7041934  |
| GPR22    | 1.2124906  |
| GPR26    | 0.8212588  |
| GPR3     | 1.0362618  |
| GPR31B   | 1.2426596  |
| GPR6     | 1.1199973  |
| GPR64    | 1.605799   |
| GPR65    | 1.9475372  |
| GPR84    | 2.8692658  |
| GPR85    | 2.0548348  |
| GPRC5B   | 1.7353585  |
| GPRC5C   | 2.2363408  |
| GPS1     | 2.1312468  |
| GPS2     | 0.89783835 |
| GPSM2    | 0.76158786 |
| GPT      | 0.9742305  |
| GPT2     | 6.5675936  |
| GPX1     | 2.819398   |
| GPX4     | 0.85455775 |

|             |            |
|-------------|------------|
| GRAMD1A     | 1.3728697  |
| GRAMD1C     | 3.7392995  |
| GRAMD3      | 2.0761201  |
| GRAMD4      | 1.1815894  |
| GRB14       | 0.6180713  |
| GRB2        | 0.569473   |
| GRB7        | 2.991441   |
| GREB1L      | 2.3186939  |
| GRHL1       | 0.47522497 |
| GRHPR       | 5.1094866  |
| GRINA       | 3.5709512  |
| GRIPAP1     | 2.6229599  |
| GRN         | 2.6480591  |
| GRPEL1      | 3.7830288  |
| GRPEL2      | 2.5140884  |
| GRSF1       | 2.3280795  |
| GRTP1       | 1.7616704  |
| GRWD1       | 2.3181489  |
| GSDMA       | 1.7794147  |
| GSDMC       | 0.63530755 |
| GSDMD       | 3.6129253  |
| GSK3A       | 1.7256048  |
| GSKIP       | 1.5888543  |
| GSPT1       | 2.3105962  |
| GSR         | 2.232166   |
| GSS         | 3.2275689  |
| GSTA2       | 0.7274513  |
| GSTA3       | 0.6006     |
| GSTK1       | 1.5373366  |
| GSTM3       | 0.5367148  |
| GSTM5       | 1.944196   |
| GSTM6       | 2.3067653  |
| GSTO1       | 0.36870217 |
| GSTP1       | 3.0624635  |
| GSTP2       | 3.2784092  |
| GSTT1       | 0.5682795  |
| GSTT2       | 2.614084   |
| GSTT3       | 2.2097652  |
| GSTZ1       | 3.3781016  |
| GT(ROSA)26S | 1.3195336  |
| GTDC1       | 1.1622541  |
| GTF2A1      | 1.2433445  |
| GTF2A2      | 2.6575835  |
| GTF2B       | 2.8070786  |
| GTF2E1      | 2.1161497  |

|          |            |
|----------|------------|
| GTF2E2   | 1.3500149  |
| GTF2F1   | 1.8913038  |
| GTF2F2   | 1.7914951  |
| GTF2H1   | 2.562691   |
| GTF2H2   | 1.3322828  |
| GTF2H3   | 1.5734122  |
| GTF2H4   | 1.5610797  |
| GTF2IRD1 | 2.2500737  |
| GTF2IRD2 | 0.75038195 |
| GTF3C1   | 0.6745436  |
| GTF3C2   | 1.8172953  |
| GTF3C3   | 1.2321665  |
| GTF3C4   | 1.6560667  |
| GTF3C5   | 1.4638355  |
| GTF3C6   | 1.9756048  |
| GTL3     | 0.6092708  |
| GTPBP1   | 0.5322244  |
| GTPBP10  | 1.1951249  |
| GTPBP2   | 1.8029425  |
| GTPBP4   | 1.514117   |
| GTPBP6   | 1.784147   |
| GTPBP8   | 2.7581131  |
| GTSE1    | 2.1697085  |
| GUCA1B   | 0.6808276  |
| GUCA2A   | 0.98642945 |
| GUCA2B   | 3.2806308  |
| GUCD1    | 3.985037   |
| GUCY2C   | 1.488311   |
| GUK1     | 0.86709714 |
| GULO     | 6.48662    |
| GUSB     | 1.102021   |
| GVIN1    | 0.6692655  |
| GXYLT1   | 0.74372697 |
| GXYLT2   | 2.9422848  |
| GYK      | 2.8730013  |
| GYLTL1B  | 0.37333226 |
| GYPE     | 0.5143707  |
| GYS1     | 1.3336365  |
| GYS2     | 8.119665   |
| GZF1     | 2.0600164  |
| GZMB     | 2.1843169  |
| H13      | 2.6052363  |
| H19      | 1.0365999  |
| H1FO     | 1.2556252  |
| H2AFJ    | 0.37011504 |

|        |            |
|--------|------------|
| H2AFV  | 0.7728083  |
| H2AFX  | 1.1747172  |
| H2AFY  | 0.8464234  |
| H2AFZ  | 0.775141   |
| H2-D1  | 1.68367    |
| H2-K1  | 2.2013087  |
| H2-K2  | 2.0826836  |
| H2-KE2 | 1.5557196  |
| H2-KE6 | 1.9347694  |
| H2-M2  | 1.9688518  |
| H2-Q1  | 3.569917   |
| H2-Q10 | 4.2580204  |
| H2-Q2  | 2.17077    |
| H2-Q4  | 2.4858372  |
| H2-Q5  | 1.2864254  |
| H2-Q7  | 2.1313124  |
| H2-Q8  | 2.0186598  |
| H2-T10 | 1.724117   |
| H2-T23 | 2.0500963  |
| H2-T9  | 1.275676   |
| H3F3B  | 2.5819309  |
| H6PD   | 4.620222   |
| HAAO   | 4.0006313  |
| HABP2  | 7.271488   |
| HABP4  | 1.0370972  |
| HACL1  | 6.177001   |
| HADHA  | 2.2201922  |
| HADHB  | 2.4939406  |
| HAGH   | 2.5457199  |
| HAL    | 5.5988207  |
| HAMP   | 9.697153   |
| HAMP2  | 2.673732   |
| HAND2  | 1.1034248  |
| HAO1   | 6.444278   |
| HAO2   | 1.5663235  |
| HARBI1 | 2.188656   |
| HARS   | 2.5276315  |
| HARS2  | 1.0022285  |
| HAT1   | 1.804632   |
| HAUS1  | 0.85972714 |
| HAUS2  | 1.5004735  |
| HAUS3  | 1.0626857  |
| HAUS4  | 0.4604571  |
| HAUS5  | 0.5765946  |
| HAUS6  | 0.6179936  |

|         |            |
|---------|------------|
| HAUS7   | 2.0194964  |
| HAUS8   | 0.4480126  |
| HAX1    | 3.1091392  |
| HBA-A1  | 0.80455494 |
| HBA-A2  | 1.75354    |
| HBB-BH1 | 1.0061092  |
| HBP1    | 2.2844589  |
| HBS1L   | 2.7893288  |
| HC      | 1.7227013  |
| HCAR2   | 2.7161157  |
| HCCS    | 1.90978    |
| HCFC1   | 1.1883223  |
| HCFC2   | 0.6982827  |
| HCK     | 0.73631597 |
| HCLS1   | 1.8962743  |
| HDAC1   | 0.8725507  |
| HDAC10  | 0.96432805 |
| HDAC11  | 0.38737106 |
| HDAC3   | 1.7109272  |
| HDAC4   | 1.1891024  |
| HDAC5   | 0.45646262 |
| HDAC9   | 0.6153188  |
| HDC     | 1.1024225  |
| HDDC2   | 0.3302138  |
| HDGF    | 1.4378502  |
| HDGFRP2 | 1.455003   |
| HDHD2   | 0.7110696  |
| HDLBP   | 4.0435934  |
| HEATR1  | 3.061773   |
| HEATR2  | 1.6632779  |
| HEATR3  | 2.2120235  |
| HEATR5A | 0.9841287  |
| HEATR5B | 0.5920279  |
| HEATR6  | 2.1962645  |
| HEBP1   | 2.313893   |
| HECA    | 1.2375352  |
| HECTD1  | 2.5352814  |
| HECTD2  | 1.0671899  |
| HECTD3  | 1.8625505  |
| HECW1   | 3.7077     |
| HELB    | 2.5407493  |
| HELQ    | 1.6646931  |
| HELZ    | 1.3477566  |
| HELZ2   | 3.2011912  |
| HEMGN   | 3.5492084  |

|           |            |
|-----------|------------|
| HERC1     | 1.2081678  |
| HERC2     | 0.9729755  |
| HERC4     | 2.0780942  |
| HERC6     | 2.9121816  |
| HERPUD1   | 3.1051667  |
| HERPUD2   | 2.1779974  |
| HESX1     | 1.3448997  |
| HEXA      | 1.0272615  |
| HEXB      | 1.6743114  |
| HEXDC     | 0.9346721  |
| HEXIM2    | 0.38223004 |
| HFE       | 2.243643   |
| HFE2      | 3.481314   |
| HGD       | 3.2202098  |
| HGF       | 1.431227   |
| HGFAC     | 2.8764136  |
| HGS       | 2.4194639  |
| HGSNAT    | 2.9775908  |
| HHEX      | 2.2304828  |
| HIAT1     | 1.345206   |
| HIATL1    | 1.5047314  |
| HIBADH    | 2.448694   |
| HIBCH     | 2.7565606  |
| HIC1      | 0.52800846 |
| HIC2      | 1.2686157  |
| HID1      | 0.7518656  |
| HIF1A     | 3.6812932  |
| HIF1AN    | 1.480788   |
| HIGD1A    | 2.4492486  |
| HIGD2A    | 1.6067655  |
| HILPDA    | 2.898554   |
| HINFP     | 1.777689   |
| HINT1     | 1.6927593  |
| HINT2     | 2.5654643  |
| HINT3     | 2.473735   |
| HIP1R     | 1.7129734  |
| HIPK1     | 0.5533445  |
| HIPK2     | 0.33807445 |
| HIPK3     | 1.9492176  |
| HIRIP3    | 0.60106635 |
| HIST1H1C  | 1.3534777  |
| HIST1H2BA | 1.8978908  |
| HIST1H2BC | 3.2152474  |
| HIST1H2BM | 2.3710144  |
| HIST1H3A  | 3.157821   |

|            |            |
|------------|------------|
| HIST1H3D   | 1.8892186  |
| HIST1H4C   | 1.0911925  |
| HIST1H4H   | 0.7032192  |
| HIST1H4J   | 0.62619996 |
| HIST1H4M   | 2.6728425  |
| HIST2H2AA2 | 0.4550135  |
| HIST2H3C2  | 0.766381   |
| HIVEP1     | 1.2665937  |
| HIVEP2     | 2.0230782  |
| HK1        | 1.6873715  |
| HK2        | 2.4469445  |
| HK3        | 2.6721923  |
| HLCS       | 0.8780067  |
| HLF        | 0.6823218  |
| HLTF       | 0.6870005  |
| HMBS       | 1.3611095  |
| HMCES      | 1.4661415  |
| HMG20B     | 1.3336232  |
| HMGA1      | 2.1493638  |
| HMGB1      | 1.1062577  |
| HMGB1-RS17 | 0.79283214 |
| HMGB2      | 0.4416921  |
| HMGB3      | 1.7842176  |
| HMGCL      | 3.6737516  |
| HMGCR      | 2.184234   |
| HMGCS1     | 2.8840659  |
| HMGCS2     | 3.7749026  |
| HMGN1      | 0.42861247 |
| HMGN2      | 0.55528045 |
| HMGN5      | 0.9146693  |
| HMGXB3     | 1.9399011  |
| HMMR       | 1.0448191  |
| HMOX1      | 5.644478   |
| HMOX2      | 2.4809902  |
| HMX3       | 0.6252272  |
| HN1L       | 1.8711548  |
| HNF1A      | 6.52866    |
| HNF4A      | 5.859025   |
| HNRNPA0    | 1.2741888  |
| HNRNPA1    | 1.1812222  |
| HNRNPA2B1  | 3.3853223  |
| HNRNPA3    | 1.511666   |
| HNRNPAB    | 2.034722   |
| HNRNPD     | 1.7843864  |
| HNRNPDL    | 0.96986604 |



|          |            |
|----------|------------|
| HNRNPH1  | 0.6096604  |
| HNRNPH2  | 1.6187041  |
| HNRNPH3  | 0.8862853  |
| HNRNPK   | 1.9570467  |
| HNRNPL   | 0.8423066  |
| HNRNPLL  | 1.5234468  |
| HNRNPM   | 1.6570652  |
| HNRNPR   | 1.2830245  |
| HNRNPU   | 0.74188733 |
| HNRNPUL1 | 0.9974382  |
| HOGA1    | 3.0358212  |
| HOMER2   | 0.98619103 |
| HOMEZ    | 1.4720306  |
| HOOK1    | 1.1430938  |
| HOOK2    | 2.4956648  |
| HOOK3    | 1.120189   |
| HP       | 3.4040737  |
| HP1BP3   | 0.833442   |
| HPCA     | 2.1303627  |
| HPD      | 7.113613   |
| HPGDS    | 1.0873773  |
| HPN      | 5.1795645  |
| HPRT     | 1.7162559  |
| HPS3     | 0.5811019  |
| HPS4     | 2.4624789  |
| HPS5     | 0.47522402 |
| HPS6     | 0.32680774 |
| HPSE     | 1.0246675  |
| HPX      | 11.070635  |
| HRAS     | 0.86681056 |
| HRG      | 8.333714   |
| HRSP12   | 3.0161002  |
| HS2ST1   | 2.3914816  |
| HS6ST1   | 2.6842942  |
| HSBP1    | 1.4372232  |
| HSD11B1  | 1.4727376  |
| HSD17B10 | 1.9651849  |
| HSD17B11 | 1.304755   |
| HSD17B12 | 3.3849938  |
| HSD17B13 | 7.844507   |
| HSD17B2  | 3.438753   |
| HSD17B3  | 2.5503278  |
| HSD17B4  | 2.0365846  |
| HSD17B6  | 2.4134462  |
| HSD17B7  | 3.111306   |

|          |            |
|----------|------------|
| HSD3B2   | 2.189029   |
| HSD3B3   | 2.0162334  |
| HSD3B7   | 3.7123253  |
| HSDL1    | 0.88548493 |
| HSDL2    | 3.139476   |
| HSF1     | 1.2051919  |
| HSF2     | 1.2753136  |
| HSF5     | 1.9102848  |
| HSP90AA1 | 1.4105356  |
| HSP90AB1 | 1.0916808  |
| HSP90B1  | 3.3142624  |
| HSPA13   | 3.2906106  |
| HSPA14   | 1.5121524  |
| HSPA2    | 1.6000144  |
| HSPA4    | 2.2572954  |
| HSPA4L   | 0.9111974  |
| HSPA5    | 3.784299   |
| HSPA8    | 2.19788    |
| HSPA9    | 4.2715216  |
| HSPB11   | 1.6278265  |
| HSPB8    | 4.5944576  |
| HSPBP1   | 1.8243945  |
| HSPD1    | 3.3986251  |
| HSPE1    | 2.925245   |
| HSPH1    | 0.9959905  |
| HTATIP2  | 2.8162444  |
| HTATSF1  | 0.68010974 |
| HTR7     | 1.0395055  |
| HTRA2    | 0.91226983 |
| HTRA4    | 1.171119   |
| HTT      | 2.206896   |
| HUNK     | 0.3349061  |
| HUS1     | 0.80982685 |
| HUWE1    | 1.5111616  |
| HYAL2    | 1.0418041  |
| HYI      | 2.5400422  |
| HYKK     | 1.5340626  |
| HYOU1    | 2.999829   |
| HYPK     | 1.6226027  |
| IAH1     | 1.5094898  |
| IARS     | 2.487347   |
| IARS2    | 2.0054648  |
| IBA57    | 2.1894972  |
| IBTK     | 4.5030193  |
| ICA1L    | 1.7492568  |

|          |            |
|----------|------------|
| ICAM1    | 1.8903582  |
| ICMT     | 1.374327   |
| ICT1     | 1.8399165  |
| ID2      | 2.6432893  |
| ID3      | 1.0045273  |
| IDE      | 1.9871509  |
| IDH1     | 0.9125352  |
| IDH2     | 0.49726987 |
| IDH3A    | 2.1086576  |
| IDH3B    | 2.083503   |
| IDH3G    | 1.441417   |
| IDI1     | 2.347223   |
| IDNK     | 2.4612806  |
| IDO2     | 2.240981   |
| IDUA     | 0.68302226 |
| IER2     | 1.5854781  |
| IER3     | 3.555692   |
| IER3IP1  | 1.3337214  |
| IFFO1    | 0.91364956 |
| IFFO2    | 2.5101712  |
| IFI202B  | 2.863849   |
| IFI204   | 3.1151063  |
| IFI27    | 2.4076455  |
| IFI27L2B | 2.5072315  |
| IFI35    | 2.1794574  |
| IFI44    | 2.2995913  |
| IFI47    | 3.0770319  |
| IFIH1    | 2.0148184  |
| IFIT1    | 2.1584651  |
| IFIT2    | 2.8731453  |
| IFIT3    | 1.4300606  |
| IFITM1   | 1.3079708  |
| IFITM2   | 3.721876   |
| IFITM3   | 3.069442   |
| IFITM5   | 1.0605152  |
| IFITM6   | 1.3429258  |
| IFITM7   | 3.7001379  |
| IFNA1    | 0.6604078  |
| IFNAR1   | 2.2363026  |
| IFNAR2   | 2.9784367  |
| IFNG     | 3.7474668  |
| IFNGR1   | 0.4965694  |
| IFNGR2   | 1.5265715  |
| IFRD1    | 3.1016262  |
| IFRD2    | 1.8785179  |

|         |            |
|---------|------------|
| IFT122  | 0.64787984 |
| IFT20   | 1.8946459  |
| IFT22   | 0.44071436 |
| IFT27   | 0.4046347  |
| IFT46   | 1.2341082  |
| IFT52   | 1.7129242  |
| IFT57   | 1.1321771  |
| IFT80   | 0.9225452  |
| IFT88   | 1.2114723  |
| IGBP1   | 1.4183257  |
| IGDCC4  | 4.192271   |
| IGF1    | 3.9057434  |
| IGF2BP2 | 0.9959264  |
| IGF2BP3 | 2.3987372  |
| IGF2R   | 0.4375975  |
| IGFALS  | 1.2220869  |
| IGFBP1  | 12.432986  |
| IGFBP2  | 1.5694821  |
| IGFBP4  | 2.0461376  |
| IGFBP7  | 0.47461486 |
| IGHMBP2 | 0.861572   |
| IGSF11  | 3.9850047  |
| IGSF23  | 4.0933065  |
| IGSF5   | 2.0128596  |
| IGSF6   | 2.0419066  |
| IGSF8   | 2.351958   |
| IGSF9   | 3.5867474  |
| IGTP    | 3.3637202  |
| IIGP1   | 4.1008205  |
| IK      | 1.8527915  |
| IKBKAP  | 1.2649825  |
| IKBKB   | 1.9699466  |
| IKBKE   | 4.3790684  |
| IKBKG   | 3.024995   |
| IKZF5   | 0.9821329  |
| IL10    | 2.288108   |
| IL10RB  | 0.50256133 |
| IL11    | 2.8894494  |
| IL12RB1 | 0.99376583 |
| IL13RA1 | 2.4228113  |
| IL15RA  | 3.5840108  |
| IL17A   | 1.1216958  |
| IL17RA  | 1.9078076  |
| IL17RB  | 4.551114   |
| IL17RC  | 1.6217701  |

|            |            |
|------------|------------|
| IL18       | 2.1820152  |
| IL18BP     | 3.7098987  |
| IL19       | 2.6219904  |
| IL1B       | 2.6184552  |
| IL1F6      | 8.307196   |
| IL1F8      | 2.3314228  |
| IL1F9      | 2.133226   |
| IL1R1      | 5.1426754  |
| IL1R2      | 4.816951   |
| IL1RAP     | 3.1045382  |
| IL1RN      | 4.6321325  |
| IL20RB     | 1.8642223  |
| IL22RA1    | 1.7001741  |
| IL23A      | 4.1164274  |
| IL23R      | 1.804436   |
| IL27       | 4.0282507  |
| IL27RA     | 0.4175725  |
| IL2RA      | 0.94353247 |
| IL2RB      | 0.5175369  |
| IL2RG      | 1.0998876  |
| IL33       | 0.65226483 |
| IL4I1      | 0.7843354  |
| IL4RA      | 1.7801163  |
| IL6        | 7.301508   |
| IL6RA      | 0.7107675  |
| IL6ST      | 1.4659069  |
| ILF2       | 0.8355763  |
| ILF3       | 1.6622007  |
| ILK        | 0.40771985 |
| ILKAP      | 1.2720954  |
| ILVBL      | 2.1907885  |
| IMAGE:6196 | 0.2935617  |
| IMMP1L     | 1.5814736  |
| IMMP2L     | 3.8894742  |
| IMMT       | 2.3958318  |
| IMP3       | 1.9912603  |
| IMP4       | 2.6701677  |
| IMPA1      | 1.663194   |
| IMPACT     | 1.9543841  |
| IMPAD1     | 1.6666262  |
| IMPDH2     | 1.9424932  |
| IMPG1      | 1.6427591  |
| IMPG2      | 1.9253795  |
| INCA1      | 1.9328482  |
| INF2       | 1.0435851  |

|        |            |
|--------|------------|
| ING1   | 0.6466453  |
| ING3   | 0.43403792 |
| ING5   | 1.5592515  |
| INHBA  | 3.570976   |
| INHBB  | 4.2191086  |
| INHBC  | 6.2006655  |
| INHBE  | 3.0423086  |
| INIP   | 0.37650704 |
| INO80B | 0.49511313 |
| INO80C | 3.0346844  |
| INO80D | 1.0878618  |
| INPP1  | 2.3507621  |
| INPP4A | 1.403358   |
| INPP5B | 0.6660793  |
| INPPL1 | 1.1010745  |
| INSC   | 7.888791   |
| INSIG1 | 2.116977   |
| INSIG2 | 5.1397324  |
| INSL6  | 0.9656713  |
| INSR   | 2.2053416  |
| INTS10 | 0.3575437  |
| INTS12 | 1.861131   |
| INTS3  | 0.6818495  |
| INTS4  | 0.7601304  |
| INTS5  | 1.911478   |
| INTS7  | 1.6634626  |
| INTS8  | 1.3710196  |
| INTS9  | 0.57636094 |
| INTU   | 1.1709223  |
| INVS   | 0.7666824  |
| IP6K1  | 1.698838   |
| IP6K2  | 0.67082334 |
| IPMK   | 1.5740459  |
| IPO11  | 1.8586919  |
| IPO13  | 0.3398292  |
| IPO4   | 1.6096804  |
| IPO5   | 1.851867   |
| IPO7   | 1.6274679  |
| IPO8   | 1.5237839  |
| IPO9   | 1.0584402  |
| IPPK   | 1.4293883  |
| IQCC   | 0.586884   |
| IQCE   | 0.5561309  |
| IQCG   | 0.48977685 |
| IQGAP2 | 2.8810685  |

|          |            |
|----------|------------|
| IRAK1    | 0.78391576 |
| IRAK1BP1 | 1.0085952  |
| IRAK2    | 1.6917689  |
| IRAK3    | 5.0336866  |
| IRAK4    | 0.5209422  |
| IREB2    | 1.4977889  |
| IRF1     | 2.2785275  |
| IRF2     | 1.4437268  |
| IRF2BP1  | 1.0737627  |
| IRF2BP2  | 1.8753235  |
| IRF3     | 1.9987185  |
| IRF6     | 2.0035846  |
| IRF7     | 2.2491696  |
| IRF8     | 2.2422798  |
| IRF9     | 1.1820786  |
| IRG1     | 4.3506966  |
| IRGM1    | 3.201121   |
| IRGM2    | 2.2130287  |
| IRGQ     | 1.5663483  |
| IRS1     | 0.5869281  |
| IRS2     | 3.9137294  |
| IRX6     | 1.2463641  |
| ISCA1    | 1.7757041  |
| ISCA2    | 1.811065   |
| ISCU     | 1.9743288  |
| ISG15    | 4.145357   |
| ISG20    | 1.7159245  |
| ISG20L2  | 1.5442796  |
| ISOC1    | 1.5706813  |
| ISOC2A   | 1.3145628  |
| IST1     | 1.943084   |
| ISY1     | 2.0710814  |
| ISYNA1   | 0.9810622  |
| ITCH     | 1.7392132  |
| ITFG1    | 1.9768202  |
| ITFG2    | 2.142515   |
| ITFG3    | 2.1051905  |
| ITGA10   | 0.2595551  |
| ITGA2    | 0.8881717  |
| ITGA5    | 1.6015675  |
| ITGA7    | 1.9898446  |
| ITGA9    | 1.867862   |
| ITGAL    | 1.4654362  |
| ITGAM    | 1.315675   |
| ITGAV    | 0.28603363 |

|            |            |
|------------|------------|
| ITGB1      | 0.4585688  |
| ITGB1BP1   | 1.6138008  |
| ITGB2      | 1.1052191  |
| ITGB3      | 1.5746953  |
| ITIH1      | 8.176365   |
| ITIH2      | 6.850836   |
| ITIH3      | 11.47596   |
| ITIH4      | 7.339513   |
| ITIH5      | 0.9001517  |
| ITM2B      | 0.43737864 |
| ITPA       | 2.1854627  |
| ITPK1      | 0.90950847 |
| ITPKC      | 3.2122247  |
| ITPR1      | 1.6767213  |
| ITPR2      | 0.9494889  |
| ITPRIP     | 1.0336277  |
| ITSN1      | 3.030481   |
| ITSN2      | 1.3785989  |
| IVD        | 1.6698925  |
| IVNS1ABP   | 0.58214116 |
| IWS1       | 0.91265273 |
| IYD        | 4.527674   |
| JADE1      | 1.1204641  |
| JADE2      | 1.054743   |
| JAGN1      | 2.271405   |
| JAK1       | 2.015786   |
| JAK2       | 0.57288766 |
| JAK3       | 1.8317883  |
| JAM2       | 1.7744348  |
| JARID2     | 0.5819986  |
| JDP2       | 1.2167475  |
| JKAMP      | 1.4535534  |
| JMJD1C     | 3.1148245  |
| JMJD6      | 1.4857075  |
| JMY        | 1.5784564  |
| JOSD1      | 2.6004188  |
| JOSD2      | 1.1320207  |
| JPX        | 2.0082154  |
| JTB        | 1.7522418  |
| JUN        | 1.7830541  |
| JUNB       | 2.7314746  |
| JUND       | 1.7742865  |
| K230015D01 | 0.9610691  |
| KANK1      | 1.8205769  |
| KANSL2     | 1.164161   |



|          |            |
|----------|------------|
| KANSL3   | 2.2151911  |
| KARS     | 2.3130958  |
| KAT2A    | 0.7362201  |
| KAT2B    | 1.429105   |
| KAT5     | 0.6847217  |
| KAT7     | 1.4790914  |
| KAT8     | 2.4143045  |
| KATNA1   | 2.1063879  |
| KATNAL1  | 1.2686975  |
| KATNB1   | 0.66657186 |
| KATNBL1  | 1.1400723  |
| KBTBD2   | 1.2098863  |
| KBTBD4   | 2.0399644  |
| KBTBD7   | 1.3342259  |
| KBTBD8   | 1.3210187  |
| KCMF1    | 2.0784323  |
| KCNA4    | 3.3905303  |
| KCND1    | 0.596509   |
| KCNE4    | 2.98636    |
| KCNJ8    | 3.0198295  |
| KCNK13   | 1.4908783  |
| KCNK5    | 1.1312865  |
| KCNN2    | 5.326069   |
| KCNQ1OT1 | 0.7599695  |
| KCNT2    | 2.407714   |
| KCP      | 2.4133868  |
| KCTD1    | 0.8107369  |
| KCTD13   | 1.0912645  |
| KCTD14   | 1.9401846  |
| KCTD15   | 2.2389872  |
| KCTD17   | 1.0195324  |
| KCTD18   | 1.2893322  |
| KCTD19   | 2.1124516  |
| KCTD20   | 2.4903347  |
| KCTD21   | 0.50579214 |
| KCTD3    | 2.4846547  |
| KCTD5    | 1.1123774  |
| KCTD6    | 1.7162864  |
| KCTD9    | 1.9240978  |
| KDELR1   | 0.9930937  |
| KDELR2   | 3.5646517  |
| KDM1A    | 1.1144898  |
| KDM1B    | 1.0116193  |
| KDM2B    | 0.6908343  |
| KDM3A    | 2.287729   |

|           |            |
|-----------|------------|
| KDM4A     | 1.8362148  |
| KDM4B     | 1.678788   |
| KDM4C     | 0.5574539  |
| KDM5A     | 1.6545556  |
| KDM5B     | 1.5447595  |
| KDM5C     | 1.5527918  |
| KDM6A     | 1.6253107  |
| KDM6B     | 1.4226644  |
| KDM8      | 0.88331485 |
| KDSR      | 1.0653994  |
| KEAP1     | 2.3408911  |
| KHDRBS1   | 1.522362   |
| KHDRBS3   | 1.949064   |
| KHK       | 4.5314865  |
| KHNYN     | 2.1244438  |
| KHSRP     | 1.6300476  |
| KIF12     | 1.3425932  |
| KIF19A    | 1.2032309  |
| KIF1B     | 1.0938466  |
| KIF1C     | 0.48630548 |
| KIF21A    | 3.3074949  |
| KIFAP3    | 0.29269624 |
| KIN       | 0.35402846 |
| KIRREL3OS | 1.5831208  |
| KIZ       | 1.4334309  |
| KLB       | 2.2710643  |
| KLC2      | 1.0351112  |
| KLC4      | 1.3520782  |
| KLF10     | 1.8943789  |
| KLF11     | 0.76547813 |
| KLF12     | 0.9501307  |
| KLF13     | 0.8489258  |
| KLF15     | 2.946729   |
| KLF2      | 0.52039504 |
| KLF3      | 1.9597256  |
| KLF9      | 1.5459793  |
| KLHDC10   | 2.415439   |
| KLHDC2    | 2.5738146  |
| KLHDC3    | 2.2017996  |
| KLHDC4    | 1.4354985  |
| KLHL11    | 0.56920123 |
| KLHL12    | 1.6311653  |
| KLHL15    | 3.3030725  |
| KLHL18    | 1.211756   |
| KLHL2     | 2.9392955  |

|           |            |
|-----------|------------|
| KLHL21    | 2.286641   |
| KLHL24    | 0.7445445  |
| KLHL25    | 2.2903821  |
| KLHL26    | 0.75745845 |
| KLHL28    | 1.0402076  |
| KLHL6     | 1.2414155  |
| KLHL7     | 0.9764738  |
| KLHL9     | 1.175844   |
| CLK1B16   | 1.8981748  |
| KLKB1     | 2.3063078  |
| KLRA1     | 1.4279668  |
| KLRA2     | 2.1533875  |
| KMO       | 4.0177107  |
| KMT2B     | 1.2391322  |
| KMT2C     | 0.75304294 |
| KNG1      | 9.90896    |
| KNG2      | 11.8559065 |
| KNOP1     | 1.6652849  |
| KPNA1     | 1.8871243  |
| KPNA2     | 1.8839362  |
| KPNA3     | 2.0152462  |
| KPNA4     | 0.9331777  |
| KPNA6     | 0.9051893  |
| KPNB1     | 0.84157443 |
| KPTN      | 0.946152   |
| KRAS      | 1.1206901  |
| KRBA1     | 1.7207224  |
| KRCC1     | 2.509197   |
| KREMEN1   | 0.608722   |
| KRI1      | 1.8783438  |
| KRIT1     | 1.2608607  |
| KRR1      | 1.3682611  |
| KRT17     | 1.6932578  |
| KRT18     | 4.685648   |
| KRT222    | 0.3768804  |
| KRT8      | 3.6674483  |
| KRT85     | 0.56410813 |
| KRTAP11-1 | 8.227596   |
| KRTAP19-4 | 1.3308108  |
| KRTAP20-2 | 2.605028   |
| KRTAP3-3  | 1.8844075  |
| KRTAP4-8  | 2.1015975  |
| KRTAP5-1  | 0.30231118 |
| KRTAP9-5  | 1.9412861  |
| KRTCAP2   | 2.6310298  |

|         |            |
|---------|------------|
| KTI12   | 2.3120477  |
| KTN1    | 1.6195009  |
| KXD1    | 1.5346429  |
| KYNU    | 3.3953376  |
| L1TD1   | 1.6453745  |
| L2HGDH  | 1.9678679  |
| L3HYPDH | 2.229664   |
| L3MBTL3 | 0.5545211  |
| L7RN6   | 1.4082077  |
| LACC1   | 3.58115    |
| LACTB   | 1.8209774  |
| LACTB2  | 2.5890915  |
| LAGE3   | 0.47964263 |
| LAMP1   | 1.1186388  |
| LAMP2   | 2.1891296  |
| LAMTOR1 | 1.6336424  |
| LAMTOR2 | 2.4092743  |
| LAMTOR3 | 1.4106681  |
| LAMTOR4 | 1.2968476  |
| LAMTOR5 | 1.4476321  |
| LANCL1  | 1.3564775  |
| LANCL2  | 1.6035478  |
| LAP3    | 3.0823472  |
| LAPTM4A | 1.5560639  |
| LARP1   | 2.503506   |
| LARP1B  | 2.9347565  |
| LARP4   | 2.5775588  |
| LARP4B  | 1.47805    |
| LARP7   | 1.2691977  |
| LARS    | 2.5751383  |
| LARS2   | 1.6252029  |
| LAS1L   | 1.3283246  |
| LASP1   | 0.98687005 |
| LATS1   | 1.0239508  |
| LBP     | 4.678337   |
| LBR     | 0.40247798 |
| LCAT    | 7.4585495  |
| LCLAT1  | 1.9870479  |
| LCMT2   | 2.0098703  |
| LCN2    | 6.275546   |
| LCOR    | 2.4109876  |
| LCORL   | 1.3232586  |
| LCP1    | 1.1925318  |
| LCP2    | 0.8907249  |
| LDB1    | 1.1435897  |

|          |            |
|----------|------------|
| LDHA     | 3.4418366  |
| LDHD     | 5.510539   |
| LDLR     | 1.7505739  |
| LDLRAD3  | 3.6118429  |
| LDLRAP1  | 0.6864984  |
| LEAP2    | 4.854226   |
| LECT2    | 6.051893   |
| LEFTY2   | 0.342453   |
| LEMD2    | 1.5082009  |
| LEMD3    | 0.36574268 |
| LENEP    | 2.5087001  |
| LENG9    | 3.0728128  |
| LEPR     | 4.853097   |
| LEPRE1   | 0.61886525 |
| LEPROT   | 1.2841551  |
| LEPROTL1 | 0.918828   |
| LETM1    | 2.0144947  |
| LETMD1   | 1.2526085  |
| LGALS3BP | 2.3279054  |
| LGALS4   | 1.1641309  |
| LGALS8   | 3.175483   |
| LGALS9   | 3.2488186  |
| LGALSL   | 0.38834834 |
| LGMN     | 2.8928726  |
| LGR4     | 2.0230298  |
| LGR5     | 1.101258   |
| LHPP     | 2.9284904  |
| LHX1OS   | 2.1276941  |
| LHX2     | 2.9569411  |
| LHX6     | 0.57897735 |
| LIAS     | 2.1128595  |
| LIG3     | 1.3734739  |
| LIG4     | 0.79763746 |
| LILRA6   | 1.7144406  |
| LILRB4   | 2.3999817  |
| LIMD1    | 0.8646076  |
| LIME1    | 0.40199637 |
| LIMK1    | 0.27668405 |
| LIMS2    | 0.66403794 |
| LIN28A   | 1.0244985  |
| LIN37    | 1.4864895  |
| LIN52    | 0.6578951  |
| LIN54    | 0.3893969  |
| LIN7A    | 2.1100895  |
| LIN7C    | 0.9563005  |

|            |            |
|------------|------------|
| LINGO4     | 3.099388   |
| LINS       | 1.7914546  |
| LIPA       | 1.0925119  |
| LIPC       | 5.877385   |
| LIPO1      | 0.51009274 |
| LIPT1      | 2.0666661  |
| LIPT2      | 0.5241623  |
| LITAF      | 3.5588424  |
| LIX1L      | 0.84302473 |
| LLGL2      | 1.2104523  |
| LLPH       | 1.4029033  |
| LMAN1      | 3.085171   |
| LMAN2      | 2.872452   |
| LMAN2L     | 1.0578663  |
| LMBR1L     | 1.4574182  |
| LMBRD1     | 1.2098172  |
| LMBRD2     | 1.6831717  |
| LMF1       | 2.2761905  |
| LMF2       | 0.7916553  |
| LMNA       | 0.9725454  |
| LMO4       | 0.6267173  |
| LMTK2      | 1.0933421  |
| LNK1       | 0.91303205 |
| LNK2       | 1.314431   |
| LOC1000488 | 3.4520442  |
| LOC1008617 | 2.5320718  |
| LOC1008617 | 1.7744052  |
| LOC1008624 | 0.90556216 |
| LOC1010557 | 2.1119378  |
| LOC1010558 | 1.3463466  |
| LOC1010558 | 1.3311017  |
| LOC1010558 | 1.2196877  |
| LOC1010559 | 1.5626581  |
| LOC1010560 | 0.5629766  |
| LOC1010560 | 2.1526158  |
| LOC1010562 | 1.7899377  |
| LOC1026319 | 1.7567794  |
| LOC1026322 | 1.8131888  |
| LOC1026324 | 1.6853716  |
| LOC1026324 | 3.5606768  |
| LOC1026327 | 1.5561521  |
| LOC1026330 | 1.6132667  |
| LOC1026332 | 2.1090972  |
| LOC1026335 | 1.7474391  |
| LOC1026336 | 0.7288263  |

LOC1026338: 1.3144305  
LOC1026340: 1.9238365  
LOC1026341: 3.7904947  
LOC1026344: 0.9156897  
LOC1026347: 1.2985256  
LOC1026350: 1.1368892  
LOC1026357: 1.9953594  
LOC1026362: 1.3816106  
LOC1026366: 2.2605789  
LOC1026371: 2.3318336  
LOC1026372: 2.6859467  
LOC1026376: 1.2528536  
LOC1026377: 2.299216  
LOC1026381: 3.6260116  
LOC1026385: 1.9096668  
LOC1026385: 3.3633168  
LOC1026386: 1.0017703  
LOC1026387: 0.80434775  
LOC1026388: 1.3009479  
LOC1026388: 3.009637  
LOC1026399: 0.5971625  
LOC1026399: 1.453357  
LOC1026399: 0.91425014  
LOC1026402: 1.0188  
LOC1026410: 2.111447  
LOC1026410: 0.97378135  
LOC1026410: 0.9157078  
LOC1026412: 1.3726997  
LOC1026413: 4.0714025  
LOC1026413: 1.5869181  
LOC1026413: 2.105355  
LOC1026413: 1.1084869  
LOC1026413: 2.9152632  
LOC1026414: 1.256882  
LOC1026415: 1.062248  
LOC1026415: 0.76570106  
LOC1026416: 2.547242  
LOC1026416: 1.9564354  
LOC1026416: 2.1967561  
LOC1026416: 1.6905997  
LOC1026416: 0.40118194  
LOC1026419: 1.3681624  
LOC1026420: 0.34029078  
LOC1026422: 1.3878939  
LOC1026423: 1.4179418

|            |            |
|------------|------------|
| LOC1026424 | 0.359174   |
| LOC1026424 | 1.1358135  |
| LOC1026424 | 1.1489484  |
| LOC1026425 | 0.8146641  |
| LOC1026426 | 0.64696383 |
| LOC1026426 | 1.3428967  |
| LOC1026427 | 0.32048607 |
| LOC1026427 | 0.87872815 |
| LOC1026428 | 0.82425904 |
| LOC1026428 | 1.169205   |
| LOC1026430 | 6.311714   |
| LOC1026430 | 1.2238333  |
| LOC1026431 | 2.4729917  |
| LOC1026432 | 1.0008318  |
| LOC547349  | 1.9256203  |
| LOC630751  | 5.4762974  |
| LOC674896  | 1.5871608  |
| LONP1      | 3.8339546  |
| LONP2      | 2.3308742  |
| LONRF1     | 1.3267405  |
| LONRF3     | 0.7283976  |
| LOXL2      | 1.592109   |
| LPAR6      | 1.5209968  |
| LPCAT2     | 0.79821944 |
| LPCAT3     | 1.5673864  |
| LPGAT1     | 3.103863   |
| LPIN1      | 4.998122   |
| LPIN2      | 1.908087   |
| LPIN3      | 2.2316191  |
| LPP        | 1.7484171  |
| LPXN       | 1.8018973  |
| LRBA       | 1.3039963  |
| LRCH1      | 0.58695626 |
| LRFN3      | 2.7006047  |
| LRG1       | 6.993614   |
| LRIF1      | 2.0638747  |
| LRIG1      | 1.0667975  |
| LRIG3      | 1.7509296  |
| LRIT1      | 5.428351   |
| LRMP       | 1.788274   |
| LRP1       | 2.2703664  |
| LRP10      | 2.2462933  |
| LRP12      | 1.1954296  |
| LRP2BP     | 1.1057904  |
| LRP3       | 1.1951549  |



|         |            |
|---------|------------|
| LRP5    | 1.6032231  |
| LRP6    | 0.91416335 |
| LRP8OS1 | 4.4360394  |
| LRPPRC  | 3.3984244  |
| LRR14   | 1.4800577  |
| LRR14B  | 2.4447718  |
| LRR19   | 2.2253854  |
| LRR20   | 1.4899871  |
| LRR24   | 1.5709636  |
| LRR25   | 1.7581518  |
| LRR28   | 2.18698    |
| LRR3    | 1.0233009  |
| LRR31   | 1.7594492  |
| LRR38   | 1.9080071  |
| LRR3B   | 1.0236535  |
| LRR40   | 2.2620218  |
| LRR41   | 1.8993509  |
| LRR42   | 2.7887375  |
| LRR47   | 2.1013234  |
| LRR48   | 0.36469293 |
| LRR58   | 1.7354376  |
| LRR59   | 3.2015269  |
| LRR61   | 0.49256134 |
| LRR8A   | 2.8961647  |
| LRR8C   | 0.8871937  |
| LRR8D   | 2.4716518  |
| LRWD1   | 1.1833951  |
| LSG1    | 2.5171802  |
| LSM1    | 2.175998   |
| LSM10   | 1.5612013  |
| LSM11   | 1.9356337  |
| LSM12   | 1.639816   |
| LSM14A  | 1.8908169  |
| LSM14B  | 0.49469447 |
| LSM2    | 1.5456922  |
| LSM3    | 0.43139672 |
| LSM4    | 2.1817157  |
| LSM5    | 1.4210126  |
| LSM6    | 1.0174339  |
| LSM7    | 0.9934056  |
| LSM8    | 1.4008882  |
| LSR     | 3.6303728  |
| LSS     | 2.484629   |
| LTA4H   | 0.82564473 |
| LTB     | 1.2601211  |

|           |            |
|-----------|------------|
| LTB4R1    | 0.95800185 |
| LTB4R2    | 1.9822407  |
| LTBR      | 1.9651616  |
| LTN1      | 1.6048226  |
| LTV1      | 2.4393418  |
| LUC7L     | 2.076142   |
| LUC7L2    | 2.7546484  |
| LUC7L3    | 1.1652882  |
| LUM       | 1.0780609  |
| LURAP1L   | 2.8367155  |
| LY6D      | 2.1728423  |
| LY6G      | 1.9008939  |
| LY6K      | 1.7495964  |
| LY96      | 2.6905177  |
| LYN       | 1.6929715  |
| LYPD5     | 2.7031195  |
| LYPLA1    | 1.9838521  |
| LYPLA2    | 1.5870831  |
| LYPLAL1   | 2.5984333  |
| LYRM4     | 1.7206714  |
| LYRM5     | 2.3964965  |
| LYSMD1    | 1.9496639  |
| LYSMD3    | 2.5793784  |
| LYSMD4    | 1.8868506  |
| LYVE1     | 1.350559   |
| LZIC      | 2.2886581  |
| LZTFL1    | 1.7547829  |
| LZTR1     | 0.4775684  |
| LZTS3     | 0.7416718  |
| M6PR      | 1.8504107  |
| MACROD1   | 0.88740563 |
| MAD1L1    | 1.8121617  |
| MAD2L1BP  | 1.1043904  |
| MAD2L2    | 2.2565691  |
| MADD      | 3.2345588  |
| MAEA      | 1.5196621  |
| MAF       | 2.229853   |
| MAF1      | 0.7712095  |
| MAFB      | 2.8737895  |
| MAFF      | 4.2769823  |
| MAFG      | 2.5522277  |
| MAFK      | 2.0555751  |
| MAG       | 1.1604035  |
| MAGEA7-PS | 1.4855781  |
| MAGED1    | 2.3940942  |

|          |            |
|----------|------------|
| MAGOH    | 1.767698   |
| MAGOHB   | 1.2770488  |
| MAGT1    | 2.1683557  |
| MAK16    | 1.246083   |
| MALAT1   | 0.5579822  |
| MALSU1   | 2.7014315  |
| MALT1    | 2.357395   |
| MAML1    | 1.3619888  |
| MAN1A    | 3.7791455  |
| MAN1A2   | 0.58408    |
| MAN1B1   | 1.3971217  |
| MAN2A1   | 3.1404874  |
| MAN2B1   | 0.64237285 |
| MAN2B2   | 0.67645574 |
| MAN2C1   | 1.8176429  |
| MANBA    | 0.888633   |
| MANEA    | 1.1955335  |
| MANF     | 3.9534104  |
| MANSC1   | 0.93607306 |
| MAOB     | 1.465215   |
| MAP1LC3B | 2.4971755  |
| MAP1S    | 1.0585496  |
| MAP2K1   | 2.6594136  |
| MAP2K2   | 2.5691159  |
| MAP2K3   | 1.6721599  |
| MAP2K4   | 1.4800174  |
| MAP2K5   | 1.1151001  |
| MAP3K1   | 2.0036986  |
| MAP3K11  | 0.9215472  |
| MAP3K14  | 1.1595452  |
| MAP3K15  | 0.78624964 |
| MAP3K4   | 0.7257011  |
| MAP3K5   | 1.5363591  |
| MAP3K6   | 2.128425   |
| MAP3K7   | 1.9393547  |
| MAP3K8   | 3.5246217  |
| MAP4K3   | 0.41883302 |
| MAP4K4   | 1.141783   |
| MAP4K5   | 1.1460087  |
| MAP6D1   | 1.2337258  |
| MAP7     | 2.4378655  |
| MAP7D1   | 0.6619866  |
| MAPK1    | 1.4395683  |
| MAPK14   | 0.7399318  |
| MAPK1IP1 | 1.627414   |

|           |            |
|-----------|------------|
| MAPK1IP1L | 1.872978   |
| MAPK6     | 2.2216833  |
| MAPK7     | 1.5290539  |
| MAPK8IP3  | 1.4082859  |
| MAPK9     | 0.9235642  |
| MAPKAPK2  | 2.1906354  |
| MAPKAPK5  | 1.8922656  |
| MAPRE1    | 1.0638878  |
| MAPRE3    | 2.1039207  |
| MARCKS    | 0.4565723  |
| MARCKSL1  | 3.1055992  |
| MARCO     | 4.727949   |
| MARF1     | 0.3974061  |
| MARK1     | 1.2100451  |
| MARK2     | 0.63731074 |
| MARK4     | 1.664799   |
| MARS      | 3.0050337  |
| MARS2     | 1.7545872  |
| MARVELD2  | 2.1958053  |
| MASP1     | 3.3028305  |
| MASP2     | 5.5667315  |
| MAST2     | 1.3518827  |
| MAST3     | 1.3533733  |
| MAT1A     | 7.5861526  |
| MAT2A     | 1.7685444  |
| MAT2B     | 0.6686208  |
| MATR3     | 1.6356032  |
| MAVS      | 2.9405873  |
| MAX       | 0.88038087 |
| MAZ       | 0.3728416  |
| MB21D2    | 2.4231608  |
| MBD1      | 5.1864614  |
| MBD2      | 1.1510241  |
| MBD3      | 0.89807916 |
| MBD6      | 1.9348648  |
| MBL1      | 4.58012    |
| MBL2      | 11.083679  |
| MBLAC1    | 0.75930905 |
| MBOAT7    | 1.7108223  |
| MBTD1     | 1.520416   |
| MBTPS1    | 1.6614988  |
| MC3R      | 1.6232481  |
| MCAM      | 3.0676377  |
| MCAT      | 1.9602978  |
| MCCC1     | 2.0577881  |

|         |            |
|---------|------------|
| MCCC1OS | 3.5825367  |
| MCCC2   | 0.8744345  |
| MCFD2   | 3.1231081  |
| MCL1    | 0.99170613 |
| MCM10   | 1.4694757  |
| MCM3    | 1.1697004  |
| MCM4    | 0.89845586 |
| MCM7    | 1.1930525  |
| MCMBP   | 1.190707   |
| MCOLN1  | 2.444782   |
| MCPH1   | 0.8663759  |
| MCRS1   | 0.5615294  |
| MCTP2   | 3.8160655  |
| MCTS1   | 1.4190619  |
| MCTS2   | 2.1520522  |
| MCUR1   | 1.9401915  |
| MDC1    | 0.8435643  |
| MDFIC   | 1.0413091  |
| MDH1    | 2.704717   |
| MDH2    | 2.6019628  |
| MDM2    | 1.7120702  |
| MDN1    | 2.0451424  |
| ME1     | 1.808265   |
| MEA1    | 1.9757903  |
| MEAF6   | 0.75833964 |
| MECP2   | 0.4951794  |
| MECR    | 0.67220163 |
| MED1    | 2.0480268  |
| MED10   | 1.5482438  |
| MED11   | 0.7622907  |
| MED12   | 0.6865866  |
| MED13   | 0.692852   |
| MED15   | 1.4390867  |
| MED16   | 2.2806368  |
| MED17   | 1.8827868  |
| MED20   | 1.649059   |
| MED21   | 1.4965937  |
| MED22   | 0.59243846 |
| MED23   | 0.87352324 |
| MED24   | 1.2557809  |
| MED26   | 1.7815354  |
| MED27   | 1.1787741  |
| MED28   | 1.1374934  |
| MED29   | 1.3016431  |
| MED30   | 0.68114305 |

|           |            |
|-----------|------------|
| MED31     | 0.95577884 |
| MED4      | 1.5443742  |
| MED6      | 1.2891414  |
| MED7      | 2.1196616  |
| MED8      | 2.27234    |
| MED9      | 2.383444   |
| MEDAG     | 1.9674556  |
| MEF2A     | 2.7557895  |
| MEF2D     | 0.81613994 |
| MEFV      | 3.0162437  |
| MEGF8     | 1.0493438  |
| MEGF9     | 1.0148096  |
| MEIOB     | 3.713288   |
| MEIS2     | 0.8760023  |
| MELK      | 2.0744917  |
| MEMO1     | 1.4442546  |
| MEN1      | 0.48331952 |
| MEPCE     | 1.1809685  |
| MERTK     | 1.1812179  |
| MESDC2    | 1.2233255  |
| METAP1    | 2.2168534  |
| METAP1D   | 2.7816298  |
| METAP2    | 1.8354962  |
| METRNL    | 1.0691874  |
| METTLL1   | 2.562937   |
| METTLL10  | 0.725548   |
| METTLL14  | 1.0589812  |
| METTLL15  | 1.4581432  |
| METTLL16  | 1.4319088  |
| METTLL18  | 1.8332474  |
| METTLL2   | 0.6887965  |
| METTLL20  | 3.1401403  |
| METTLL21A | 0.9383795  |
| METTLL22  | 2.297618   |
| METTLL25  | 0.79896235 |
| METTLL3   | 1.5467417  |
| METTLL4   | 1.0883377  |
| METTLL5   | 1.5117781  |
| METTLL6   | 1.804322   |
| METTLL7B  | 2.8661969  |
| METTLL9   | 1.6737964  |
| MEX3C     | 1.1402667  |
| MEX3D     | 0.94052196 |
| MFAP1A    | 0.9544871  |
| MFAP1B    | 0.6499698  |

|         |            |
|---------|------------|
| MFAP3   | 1.2916553  |
| MFF     | 1.1455991  |
| MFI2    | 1.4831514  |
| MFN1    | 2.548845   |
| MFN2    | 1.7009351  |
| MFSD1   | 1.5348322  |
| MFSD10  | 1.1189048  |
| MFSD11  | 1.1425219  |
| MFSD12  | 0.96241355 |
| MFSD2A  | 5.5003433  |
| MFSD2B  | 1.2156599  |
| MFSD3   | 1.6042345  |
| MFSD5   | 1.671066   |
| MFSD6   | 0.3937676  |
| MFSD7B  | 2.0474145  |
| MFSD8   | 0.7179675  |
| MGA     | 1.0181229  |
| MGAM    | 6.031534   |
| MGARP   | 5.1508493  |
| MGAT1   | 1.3537529  |
| MGAT2   | 1.9609139  |
| MGAT4B  | 0.52032876 |
| MGAT5B  | 1.7121217  |
| MGEA5   | 1.6999128  |
| MGMT    | 2.5952003  |
| MGRN1   | 1.7070711  |
| MGST1   | 3.552942   |
| MIA2    | 3.9242904  |
| MIA3    | 2.0620854  |
| MIB1    | 2.1259477  |
| MIB2    | 1.2545717  |
| MICALL1 | 1.5492585  |
| MICALL2 | 0.92736435 |
| MICU1   | 1.2588112  |
| MICU2   | 1.5970142  |
| MID1    | 3.5726483  |
| MIDN    | 1.3005059  |
| MIEF1   | 1.7079632  |
| MIEN1   | 2.119755   |
| MIER1   | 0.6244252  |
| MIER2   | 2.2718952  |
| MIER3   | 2.0859993  |
| MIF     | 3.8110144  |
| MIF4GD  | 1.2520249  |
| MIIP    | 0.7032254  |

|         |            |
|---------|------------|
| MILR1   | 2.0581136  |
| MINA    | 2.5724695  |
| MINOS1  | 0.7250469  |
| MINPP1  | 2.4645665  |
| MIOS    | 1.2752075  |
| MIOX    | 2.4874542  |
| MIPEP   | 0.38312483 |
| MIR17HG | 2.3997443  |
| MIR22HG | 2.2187774  |
| MIS12   | 2.1335084  |
| MITD1   | 1.5139253  |
| MITF    | 0.26484656 |
| MKKS    | 0.6162913  |
| MKL1    | 0.7098634  |
| MKL2    | 0.8566916  |
| MKLN1   | 1.6129558  |
| MKNK2   | 2.245352   |
| MKRN1   | 0.47454906 |
| MKS1    | 1.2355001  |
| MKX     | 2.9182072  |
| MLEC    | 2.0422595  |
| MLF2    | 1.354625   |
| MLH1    | 1.2599056  |
| MLH3    | 0.9619732  |
| MLKL    | 3.4912841  |
| MLLT1   | 1.0324347  |
| MLLT10  | 0.75554824 |
| MLLT4   | 1.482085   |
| MLLT6   | 2.407088   |
| MLX     | 2.3768418  |
| MLXIP   | 0.41572523 |
| MLXIPL  | 4.4121494  |
| MLYCD   | 3.1757839  |
| MMAA    | 0.83847785 |
| MMAB    | 1.3561585  |
| MMACHC  | 2.901481   |
| MMADHC  | 3.226422   |
| MMGT1   | 0.8653376  |
| MMP14   | 0.99277425 |
| MMP3    | 0.9164357  |
| MMP7    | 3.1476314  |
| MMP8    | 1.5244944  |
| MMS22L  | 3.7419412  |
| MNDA    | 1.0017493  |
| MNT     | 1.3912771  |



|           |            |
|-----------|------------|
| MOAP1     | 1.7248046  |
| MOB1A     | 1.0173008  |
| MOB1B     | 0.8646469  |
| MOB2      | 0.84444356 |
| MOB3B     | 0.3961377  |
| MOB3C     | 0.81169105 |
| MOB4      | 1.6971953  |
| MOCOS     | 4.1491766  |
| MOCS1     | 3.1813667  |
| MOCS2     | 2.2092254  |
| MOCS3     | 2.6326168  |
| MOGS      | 2.6427362  |
| MON1A     | 2.5330064  |
| MON1B     | 0.999501   |
| MON2      | 1.7779431  |
| MORC1     | 0.44987726 |
| MORC2A    | 1.2789204  |
| MORC3     | 2.0715444  |
| MORC4     | 2.9921186  |
| MORF4L1   | 1.744559   |
| MORF4L2   | 2.227968   |
| MOSPD1    | 1.9624603  |
| MOSPD2    | 1.441252   |
| MOSPD3    | 0.45277715 |
| MOV10     | 2.663112   |
| MPC1      | 2.3806298  |
| MPC2      | 2.5778558  |
| MPDU1     | 1.9343927  |
| MPEG1     | 1.9238551  |
| MPG       | 2.0281217  |
| MPHOSPH10 | 1.2246053  |
| MPHOSPH6  | 1.0671918  |
| MPHOSPH8  | 1.7161644  |
| MPI       | 1.8693984  |
| MPND      | 2.513623   |
| MPP6      | 4.3781157  |
| MPPE1     | 0.7206886  |
| MPST      | 0.99724174 |
| MPV17     | 1.9579895  |
| MPV17L2   | 1.17012    |
| MPZL1     | 0.77965045 |
| MPZL2     | 4.8303957  |
| MPZL3     | 1.3553255  |
| MRAP      | 4.737463   |
| MRE11A    | 1.8756301  |

|        |           |
|--------|-----------|
| MREG   | 4.030116  |
| MRFAP1 | 1.6196873 |
| MRGBP  | 1.2658479 |
| MRI1   | 1.4821436 |
| MRM1   | 0.9242809 |
| MROH1  | 1.5469091 |
| MRPL1  | 1.2220597 |
| MRPL10 | 2.352063  |
| MRPL11 | 1.907532  |
| MRPL12 | 1.8829224 |
| MRPL13 | 2.041231  |
| MRPL14 | 1.2379138 |
| MRPL15 | 3.217553  |
| MRPL16 | 3.2270257 |
| MRPL17 | 3.7089374 |
| MRPL18 | 1.9245732 |
| MRPL19 | 1.6978111 |
| MRPL2  | 1.3016732 |
| MRPL20 | 2.1151812 |
| MRPL21 | 2.02762   |
| MRPL22 | 1.6611845 |
| MRPL23 | 1.664717  |
| MRPL24 | 2.5386045 |
| MRPL27 | 2.2708595 |
| MRPL3  | 1.7488482 |
| MRPL30 | 2.1942942 |
| MRPL32 | 1.8061178 |
| MRPL33 | 0.9533808 |
| MRPL34 | 1.4078362 |
| MRPL36 | 2.176223  |
| MRPL37 | 2.830273  |
| MRPL38 | 3.9017866 |
| MRPL39 | 1.9461405 |
| MRPL4  | 1.6602209 |
| MRPL40 | 1.9944799 |
| MRPL41 | 2.6208088 |
| MRPL42 | 1.4516065 |
| MRPL43 | 2.2894957 |
| MRPL44 | 2.0139654 |
| MRPL45 | 2.7078846 |
| MRPL46 | 2.5452945 |
| MRPL47 | 2.4665167 |
| MRPL48 | 1.2347791 |
| MRPL49 | 0.6383512 |
| MRPL50 | 2.6534374 |

|         |            |
|---------|------------|
| MRPL51  | 2.6103518  |
| MRPL52  | 2.7514727  |
| MRPL53  | 1.9195712  |
| MRPL54  | 2.164436   |
| MRPL55  | 1.8177783  |
| MRPL57  | 2.1134727  |
| MRPL9   | 2.3662016  |
| MRPS10  | 2.000602   |
| MRPS12  | 2.4925568  |
| MRPS14  | 1.1625106  |
| MRPS15  | 2.4853103  |
| MRPS16  | 1.9497535  |
| MRPS17  | 1.615711   |
| MRPS18A | 1.069639   |
| MRPS18B | 4.29893    |
| MRPS18C | 1.9332922  |
| MRPS2   | 2.5705411  |
| MRPS21  | 0.82959914 |
| MRPS22  | 2.37971    |
| MRPS23  | 1.5565898  |
| MRPS24  | 1.880944   |
| MRPS25  | 0.910661   |
| MRPS26  | 1.7127202  |
| MRPS27  | 1.9805007  |
| MRPS28  | 2.2133472  |
| MRPS30  | 2.3622925  |
| MRPS31  | 2.8808482  |
| MRPS33  | 1.8079784  |
| MRPS34  | 2.8167293  |
| MRPS35  | 1.2022765  |
| MRPS36  | 0.90627074 |
| MRPS5   | 2.462498   |
| MRPS6   | 1.5527995  |
| MRPS7   | 2.308462   |
| MRPS9   | 2.0307143  |
| MRS2    | 0.6538353  |
| MRTO4   | 2.416877   |
| MS4A4A  | 3.1452057  |
| MS4A4C  | 3.175009   |
| MS4A6B  | 1.77407    |
| MS4A6C  | 2.518153   |
| MS4A6D  | 3.706238   |
| MS4A8A  | 3.0303996  |
| MSANTD2 | 0.4766965  |
| MSANTD4 | 1.709379   |

|         |            |
|---------|------------|
| MSH2    | 1.7993968  |
| MSH6    | 1.5461004  |
| MSL1    | 0.9473045  |
| MSL2    | 0.9200747  |
| MSL3    | 1.6553466  |
| MSMO1   | 3.0086882  |
| MSR1    | 4.268133   |
| MSRA    | 3.3483903  |
| MSRB1   | 1.644851   |
| MSRB2   | 0.92779565 |
| MST1    | 8.118801   |
| MST1R   | 2.0335462  |
| MT1     | 5.5462894  |
| MT2     | 5.89396    |
| MT3     | 0.5759964  |
| MTA2    | 1.5376651  |
| MTA3    | 1.71049    |
| MTAP    | 0.537313   |
| MTBP    | 2.1713722  |
| MTCH2   | 2.7875865  |
| MTDH    | 1.7844346  |
| MTERF1A | 0.81498265 |
| MTERFD1 | 1.6945717  |
| MTERFD2 | 1.9331992  |
| MTF1    | 0.8417835  |
| MTF2    | 1.214782   |
| MTFMT   | 1.8004715  |
| MTFP1   | 1.9980538  |
| MTFR1   | 2.8420417  |
| MTFR1L  | 1.2445195  |
| MTFR2   | 3.5024927  |
| MTG1    | 1.5701253  |
| MTG2    | 2.6348293  |
| MTHFD1  | 0.63649774 |
| MTHFD1L | 2.6537406  |
| MTHFD2  | 2.370527   |
| MTHFR   | 1.1433771  |
| MTHFS   | 2.143769   |
| MTIF2   | 2.7832897  |
| MTIF3   | 0.66981554 |
| MTM1    | 1.020536   |
| MTMR1   | 1.3943169  |
| MTMR10  | 1.0060453  |
| MTMR11  | 3.2222695  |
| MTMR12  | 1.2022712  |

|         |            |
|---------|------------|
| MTMR14  | 1.8104036  |
| MTMR2   | 0.91957736 |
| MTMR3   | 0.641453   |
| MTMR4   | 2.0253174  |
| MTMR6   | 0.6464226  |
| MTMR7   | 2.3451402  |
| MTMR9   | 0.7420106  |
| MTO1    | 1.9356277  |
| MTOR    | 2.4041243  |
| MTPAP   | 2.0877755  |
| MTPN    | 1.5356948  |
| MTRF1L  | 1.4607179  |
| MTSS1   | 4.175313   |
| MTTP    | 5.8911114  |
| MTUS1   | 1.4562047  |
| MTUS2   | 0.4896536  |
| MTX1    | 2.2647069  |
| MTX2    | 2.7416317  |
| MUG1    | 10.176828  |
| MUG2    | 10.782334  |
| MUL1    | 3.5600603  |
| MUP1    | 2.8136013  |
| MUP17   | 3.6892157  |
| MUP19   | 2.1937048  |
| MUP2    | 1.5355687  |
| MUP20   | 2.3852818  |
| MUP21   | 3.7331402  |
| MUP3    | 6.146245   |
| MUP4    | 3.882414   |
| MUP5    | 5.274135   |
| MUT     | 2.414355   |
| MVB12A  | 3.2702038  |
| MVD     | 2.0152476  |
| MVK     | 0.8314445  |
| MVP     | 3.8907988  |
| MX1     | 1.0553982  |
| MX2     | 2.5412443  |
| MXD1    | 2.4221485  |
| MYBBP1A | 1.5773985  |
| MYC     | 3.5218165  |
| MYCBP2  | 1.2528927  |
| MYD88   | 2.5263698  |
| MYEOV2  | 1.4521778  |
| MYF5    | 1.7550788  |
| MYF6    | 0.6591065  |

|         |            |
|---------|------------|
| MYG1    | 1.3177173  |
| MYH9    | 0.6220305  |
| MYL12A  | 0.35061383 |
| MYL6    | 0.49586844 |
| MYO18A  | 0.88771605 |
| MYO19   | 1.1708944  |
| MYO5B   | 0.4856894  |
| MYO7B   | 1.0683289  |
| MYO9B   | 0.94408584 |
| MYSM1   | 0.9405153  |
| MZT1    | 1.2798784  |
| MZT2    | 1.9498475  |
| N4BP2   | 2.2701104  |
| N4BP2L1 | 0.7761252  |
| N4BP2L2 | 0.3683467  |
| N6AMT1  | 1.0460927  |
| N6AMT2  | 1.3647649  |
| NAA10   | 0.9219053  |
| NAA15   | 1.9223897  |
| NAA20   | 1.8547714  |
| NAA25   | 3.7238772  |
| NAA30   | 1.8077509  |
| NAA35   | 1.7994773  |
| NAA38   | 1.2548249  |
| NAA40   | 1.623637   |
| NAA50   | 1.6966445  |
| NAA60   | 0.74577785 |
| NAB1    | 2.0907218  |
| NAB2    | 1.8850324  |
| NABP1   | 1.4711285  |
| NABP2   | 1.192579   |
| NACA    | 1.4870818  |
| NACC2   | 0.92605805 |
| NADK    | 2.4815462  |
| NADK2   | 2.0316355  |
| NADSYN1 | 3.7658904  |
| NAE1    | 1.9124787  |
| NAF1    | 1.412523   |
| NAGA    | 0.62470174 |
| NAGK    | 1.6386945  |
| NAGLU   | 1.6982558  |
| NAGS    | 2.6459672  |
| NAIP2   | 1.5442469  |
| NAIP5   | 2.5311453  |
| NAIP6   | 1.1918237  |

|         |            |
|---------|------------|
| NAMPT   | 4.114393   |
| NANOG   | 1.2475257  |
| NANP    | 2.7230477  |
| NANS    | 2.1949708  |
| NAP1L1  | 1.7782862  |
| NAPA    | 2.5774734  |
| NAPB    | 0.90107894 |
| NAPG    | 1.2489784  |
| NAPRT1  | 4.2884426  |
| NARF    | 1.3620889  |
| NARFL   | 1.5627992  |
| NARG2   | 1.1062479  |
| NARS    | 2.8997371  |
| NARS2   | 2.099736   |
| NASP    | 1.3924134  |
| NAT10   | 1.727701   |
| NAT2    | 2.1308267  |
| NAT6    | 0.89323163 |
| NAT8    | 1.4047465  |
| NBAS    | 2.7573926  |
| NBN     | 1.1222179  |
| NBR1    | 2.532367   |
| NCAPD3  | 0.6043315  |
| NCAPH2  | 1.0734475  |
| NCBP1   | 1.2357028  |
| NCDN    | 1.2599804  |
| NCEH1   | 1.2056558  |
| NCF1    | 1.6230605  |
| NCF2    | 0.5713656  |
| NCF4    | 1.3759553  |
| NCK1    | 2.7557623  |
| NCKAP1  | 1.6536825  |
| NCKAP1L | 0.8945596  |
| NCL     | 2.8855379  |
| NCLN    | 2.1095593  |
| NCOA1   | 0.61060023 |
| NCOA2   | 2.3814375  |
| NCOA4   | 2.358431   |
| NCOA5   | 0.9901836  |
| NCOA6   | 0.3926351  |
| NCOR2   | 0.94507    |
| NCSTN   | 0.9492018  |
| ND1     | 2.4100106  |
| ND2     | 2.247397   |
| ND3     | 2.7424867  |

|         |            |
|---------|------------|
| ND4     | 2.3370726  |
| ND4L    | 2.6467965  |
| ND5     | 2.8434026  |
| ND6     | 1.0743315  |
| NDC1    | 1.4571307  |
| NDEL1   | 1.7342384  |
| NDFIP1  | 1.7568152  |
| NDNL2   | 0.41877198 |
| NDOR1   | 2.070843   |
| NDRG1   | 3.5418122  |
| NDRG2   | 2.088001   |
| NDRG3   | 0.76605344 |
| NDST2   | 1.7387407  |
| NDUFA1  | 1.9823511  |
| NDUFA10 | 1.8538725  |
| NDUFA11 | 1.3466775  |
| NDUFA12 | 1.8211277  |
| NDUFA13 | 1.6578572  |
| NDUFA2  | 1.7879918  |
| NDUFA3  | 1.7733529  |
| NDUFA4  | 2.52581    |
| NDUFA5  | 1.331929   |
| NDUFA6  | 1.5860364  |
| NDUFA7  | 1.6795018  |
| NDUFA8  | 1.9288843  |
| NDUFA9  | 2.9783738  |
| NDUFAB1 | 2.5321782  |
| NDUFAF1 | 0.6277511  |
| NDUFAF2 | 1.2516081  |
| NDUFAF3 | 0.88866067 |
| NDUFAF4 | 3.1454656  |
| NDUFAF6 | 1.8156645  |
| NDUFAF7 | 1.5876257  |
| NDUFB10 | 1.0330646  |
| NDUFB11 | 1.132385   |
| NDUFB2  | 2.1299188  |
| NDUFB3  | 1.0698645  |
| NDUFB4  | 1.6380689  |
| NDUFB5  | 1.3370774  |
| NDUFB6  | 2.3987534  |
| NDUFB7  | 2.2309153  |
| NDUFB8  | 1.9152234  |
| NDUFB9  | 2.2293875  |
| NDUFC1  | 1.9321306  |
| NDUFC2  | 2.1703317  |



|         |            |
|---------|------------|
| NDUFS1  | 2.6069515  |
| NDUFS2  | 2.0731452  |
| NDUFS3  | 2.3379176  |
| NDUFS4  | 2.459336   |
| NDUFS5  | 1.4651659  |
| NDUFS6  | 1.7317297  |
| NDUFS7  | 1.7137411  |
| NDUFS8  | 2.0680263  |
| NDUFV1  | 2.568134   |
| NDUFV2  | 1.9616554  |
| NDUFV3  | 1.3187697  |
| NEAT1   | 1.6892068  |
| NECAP1  | 2.2075284  |
| NECAP2  | 1.6490352  |
| NEDD1   | 1.9143565  |
| NEDD4   | 1.2105377  |
| NEDD4L  | 3.3187215  |
| NEDD8   | 0.95954204 |
| NEK1    | 0.6012986  |
| NEK3    | 2.000746   |
| NEK4    | 2.1945155  |
| NEK6    | 3.0097349  |
| NEK7    | 1.6604807  |
| NEK8    | 1.6035469  |
| NEK9    | 1.2611759  |
| NELFA   | 1.0996301  |
| NELFB   | 0.97934127 |
| NELFCD  | 2.5270393  |
| NELFE   | 1.117338   |
| NEMF    | 1.7616627  |
| NET1    | 1.5763962  |
| NEU1    | 3.1839721  |
| NEU3    | 1.3096321  |
| NEURL1B | 3.5571978  |
| NEURL2  | 0.97157264 |
| NEURL3  | 3.7659624  |
| NEURL4  | 1.4306481  |
| NF1     | 1.657984   |
| NFE2L1  | 1.1377633  |
| NFE2L2  | 1.6774704  |
| NFIC    | 0.42509675 |
| NFIL3   | 3.9184272  |
| NFKB2   | 2.396919   |
| NFKBIA  | 2.5546033  |
| NFKBIB  | 3.7119367  |

|           |            |
|-----------|------------|
| NFKBID    | 1.1797006  |
| NFKBIE    | 1.468838   |
| NFKBIL1   | 1.5991986  |
| NFKBIZ    | 1.3696458  |
| NFRKB     | 1.5095384  |
| NFS1      | 2.4868033  |
| NFU1      | 1.7718222  |
| NFX1      | 0.50518394 |
| NFXL1     | 2.9591162  |
| NFYA      | 0.8502991  |
| NFYB      | 1.7286141  |
| NFYC      | 1.5588696  |
| NGDN      | 2.5548065  |
| NGEF      | 1.0089967  |
| NGF       | 1.0832789  |
| NGFR      | 0.7785771  |
| NGLY1     | 1.4758935  |
| NGRN      | 1.6959603  |
| NHEJ1     | 1.0916159  |
| NHLRC3    | 0.9442222  |
| NHP2      | 2.0687444  |
| NHP2L1    | 2.0177972  |
| NHSL1     | 0.6324892  |
| NICN1     | 0.45882154 |
| NID1      | 1.2806017  |
| NIF3L1    | 2.6983826  |
| NIFK      | 1.9782307  |
| NINJ1     | 4.071474   |
| NIPA2     | 0.9919975  |
| NIPAL1    | 5.876749   |
| NIPBL     | 1.0580633  |
| NIPSNAP1  | 4.0660324  |
| NIPSNAP3B | 3.4880736  |
| NISCH     | 0.7893913  |
| NIT1      | 2.6436684  |
| NKAP      | 0.5981612  |
| NKD2      | 1.6874163  |
| NKIRAS1   | 2.09177    |
| NKIRAS2   | 0.9110153  |
| NKRF      | 1.5560663  |
| NKTR      | 2.0105307  |
| NLGN3     | 0.6426332  |
| NLK       | 0.2783029  |
| NLN       | 2.3884385  |
| NLRC3     | 0.32440257 |

|        |            |
|--------|------------|
| NLRC4  | 1.1069448  |
| NLRC5  | 1.9927442  |
| NLRP3  | 0.7039306  |
| NLRP6  | 0.8137567  |
| NMD3   | 1.643686   |
| NME1   | 2.5037725  |
| NME2   | 2.8622382  |
| NME4   | 1.3560629  |
| NME6   | 3.8761384  |
| NME7   | 1.0581329  |
| NMI    | 2.396201   |
| NMNAT1 | 3.192724   |
| NMNAT3 | 2.7727244  |
| NMRAL1 | 1.2913749  |
| NMRK1  | 3.2078001  |
| NMT1   | 2.0285332  |
| NNMT   | 6.6302576  |
| NNT    | 1.9594319  |
| NOA1   | 1.0313795  |
| NOB1   | 2.0370827  |
| NOC2L  | 2.3666055  |
| NOC3L  | 0.78451324 |
| NOC4L  | 2.236873   |
| NOD1   | 0.7752936  |
| NODAL  | 1.1997769  |
| NOG    | 0.47256804 |
| NOL11  | 1.2334192  |
| NOL12  | 3.5865471  |
| NOL6   | 1.8419812  |
| NOL7   | 1.2585146  |
| NOL8   | 1.1035225  |
| NOLC1  | 2.0995471  |
| NOM1   | 2.2270982  |
| NOMO1  | 2.4255764  |
| NONO   | 0.95544314 |
| NOP10  | 1.3366411  |
| NOP14  | 2.7065265  |
| NOP16  | 2.7918537  |
| NOP2   | 2.967532   |
| NOP56  | 1.3256218  |
| NOP58  | 2.9934595  |
| NOS1AP | 4.086995   |
| NOS2   | 7.3571596  |
| NOS3   | 1.4264929  |
| NOSIP  | 1.0929649  |

|         |            |
|---------|------------|
| NOTCH2  | 0.644655   |
| NOXA1   | 1.2956593  |
| NPC1    | 2.5741136  |
| NPDC1   | 0.4340217  |
| NPEPL1  | 1.2627757  |
| NPEPPS  | 1.5837505  |
| NPHP1   | 0.44956708 |
| NPHP3   | 1.015384   |
| NPL     | 2.3250206  |
| NPLOC4  | 2.403096   |
| NPM1    | 1.9237235  |
| NPPC    | 2.0419714  |
| NPRL3   | 0.98902583 |
| NPTN    | 0.49034238 |
| NPY     | 3.8314302  |
| NQO1    | 0.8595731  |
| NQO2    | 0.69093156 |
| NR1D2   | 2.3807719  |
| NR1H2   | 1.3220842  |
| NR1H3   | 2.6312997  |
| NR1H4   | 7.7155714  |
| NR1I2   | 3.8525913  |
| NR1I3   | 1.0525653  |
| NR2C1   | 1.5986793  |
| NR2C2   | 1.2624929  |
| NR2C2AP | 1.1583283  |
| NR2F6   | 1.8694775  |
| NR3C1   | 0.3893416  |
| NR4A1   | 1.8552005  |
| NR5A2   | 2.1430428  |
| NR6A1   | 1.894943   |
| NRAS    | 0.93217826 |
| NRBF2   | 2.4743302  |
| NRBP1   | 1.2760293  |
| NRBP2   | 1.8560836  |
| NRDE2   | 0.97400284 |
| NRG1    | 0.9984019  |
| NRG4    | 7.884054   |
| NRIP1   | 1.4271252  |
| NRN1    | 0.26886868 |
| NRN1L   | 1.2064586  |
| NRP2    | 0.7418301  |
| NRSN2   | 0.93366456 |
| NSA2    | 1.1256802  |
| NSD1    | 0.4496143  |

|         |            |
|---------|------------|
| NSDHL   | 2.9696014  |
| NSF     | 0.8974588  |
| NSFL1C  | 2.270346   |
| NSMAF   | 0.54890895 |
| NSMCE1  | 1.360379   |
| NSMCE2  | 1.5331771  |
| NSMCE4A | 1.146384   |
| NSMF    | 2.4576662  |
| NSUN2   | 2.4106548  |
| NSUN3   | 1.5315764  |
| NSUN4   | 1.0086808  |
| NT5C    | 0.73107886 |
| NT5C2   | 1.7337735  |
| NT5C3   | 2.25292    |
| NT5C3B  | 0.6748779  |
| NT5DC1  | 1.7334158  |
| NT5DC3  | 2.1403716  |
| NT5E    | 0.70137715 |
| NT5M    | 1.8133523  |
| NTF3    | 2.8862028  |
| NTMT1   | 1.9548509  |
| NTN3    | 2.4902637  |
| NTPCR   | 0.8266418  |
| NUAK2   | 1.660496   |
| NUB1    | 0.9991219  |
| NUBP1   | 2.7587135  |
| NUBP2   | 2.0518243  |
| NUBPL   | 2.7561839  |
| NUCB1   | 1.3234174  |
| NUCB2   | 1.3286221  |
| NUCKS1  | 1.9809616  |
| NUDC    | 1.3892596  |
| NUDCD1  | 0.78833604 |
| NUDCD2  | 2.0514696  |
| NUDCD3  | 0.7120373  |
| NUDT1   | 1.4894459  |
| NUDT12  | 4.4943433  |
| NUDT19  | 3.4787567  |
| NUDT2   | 1.0350599  |
| NUDT21  | 1.794019   |
| NUDT22  | 1.9632909  |
| NUDT3   | 0.3533013  |
| NUDT4   | 3.043689   |
| NUDT5   | 1.8766534  |
| NUDT6   | 1.9697998  |

|         |            |
|---------|------------|
| NUDT7   | 4.5734396  |
| NUDT8   | 1.6851323  |
| NUDT9   | 1.680557   |
| NUFIP1  | 1.9528282  |
| NUFIP2  | 1.9016101  |
| NUMA1   | 0.34986663 |
| NUP107  | 0.7451179  |
| NUP133  | 0.9440129  |
| NUP153  | 1.0769794  |
| NUP155  | 0.41758323 |
| NUP160  | 1.6552308  |
| NUP205  | 2.0981362  |
| NUP35   | 1.1934788  |
| NUP37   | 1.5986784  |
| NUP43   | 1.7107866  |
| NUP50   | 3.267536   |
| NUP54   | 2.6140425  |
| NUP62   | 1.6285069  |
| NUP85   | 1.4315794  |
| NUP88   | 1.638315   |
| NUP93   | 1.0232799  |
| NUP98   | 1.4959795  |
| NUPL2   | 0.5498562  |
| NUS1    | 1.4057863  |
| NXF1    | 1.5751107  |
| NXPH4   | 1.0394406  |
| NXT1    | 1.9426625  |
| NXT2    | 1.6858313  |
| OAF     | 6.4787645  |
| OARD1   | 1.1864855  |
| OAS1A   | 2.9424198  |
| OAS1B   | 2.574344   |
| OAS1F   | 2.431905   |
| OAS2    | 1.4593346  |
| OAS3    | 1.2869372  |
| OASL1   | 5.1181097  |
| OASL2   | 1.9017646  |
| OAT     | 2.184231   |
| OAZ1    | 1.2048304  |
| OCEL1   | 1.607415   |
| OCIAD1  | 2.345194   |
| OCRL    | 0.86354804 |
| OCSTAMP | 1.7997358  |
| ODC1    | 2.8571298  |
| ODF2    | 1.7014239  |

|             |            |
|-------------|------------|
| ODF2L       | 2.0560238  |
| OFD1        | 2.276068   |
| OGDH        | 1.3048036  |
| OGFOD1      | 3.3558862  |
| OGFOD2      | 1.2199395  |
| OGFOD3      | 1.151438   |
| OGFR        | 2.6511314  |
| OGT         | 1.0870397  |
| OIT3        | 4.7445717  |
| OLA1        | 1.4471653  |
| OLFM4       | 1.8729725  |
| OLFR1116-PS | 2.0418105  |
| OLFR1229    | 1.3125916  |
| OLFR1247    | 0.79362917 |
| OLFR1260    | 3.2067733  |
| OLFR139     | 2.1850207  |
| OLFR141     | 1.2028902  |
| OLFR1412    | 0.33548594 |
| OLFR143     | 1.8713732  |
| OLFR1443    | 0.36857915 |
| OLFR1466    | 1.2088468  |
| OLFR149     | 0.85935974 |
| OLFR153     | 0.8666682  |
| OLFR224     | 0.69068    |
| OLFR424     | 4.5803537  |
| OLFR549     | 0.81224775 |
| OLFR609     | 1.7546604  |
| OLFR740     | 2.4079554  |
| OLFR796     | 0.30761528 |
| OLFR97      | 1.6361754  |
| OLIG1       | 7.0806026  |
| OLR1        | 1.274867   |
| OMA1        | 0.7417877  |
| ONECUT1     | 2.4519265  |
| ONECUT2     | 7.3923616  |
| OPA1        | 2.1510274  |
| OPA3        | 1.7622216  |
| OPLAH       | 3.6556551  |
| OPTN        | 2.726762   |
| ORAI3       | 0.5556462  |
| ORAOV1      | 0.44844007 |
| ORC2        | 0.8129995  |
| ORC3        | 2.0647519  |
| ORC5        | 1.6551931  |
| ORC6        | 0.59492135 |

|         |            |
|---------|------------|
| ORM1    | 10.751582  |
| ORM2    | 11.931323  |
| ORM3    | 4.24842    |
| ORMDL1  | 1.8949201  |
| ORMDL2  | 1.9737618  |
| ORMDL3  | 2.5442345  |
| OS9     | 2.5069711  |
| OSBP    | 1.4497049  |
| OSBPL11 | 1.2528603  |
| OSBPL1A | 3.4719627  |
| OSBPL2  | 0.89231133 |
| OSBPL9  | 1.2885058  |
| OSCAR   | 4.381407   |
| OSER1   | 2.12526    |
| OSGEP   | 0.5063813  |
| OSGEPL1 | 2.8395536  |
| OSGIN1  | 2.6891563  |
| OSMR    | 2.715881   |
| OST4    | 1.4722478  |
| OSTC    | 2.44261    |
| OSTF1   | 1.0946443  |
| OSTM1   | 0.8276737  |
| OTC     | 6.737586   |
| OTOF    | 0.9525411  |
| OTUD3   | 3.0332687  |
| OTUD4   | 2.0465953  |
| OTUD5   | 2.1230223  |
| OTUD6B  | 1.9543502  |
| OTULIN  | 1.8027413  |
| OVCA2   | 0.70794106 |
| OVOL2   | 1.4573715  |
| OXA1L   | 1.4159896  |
| OXLD1   | 0.7555945  |
| OXNAD1  | 3.3301857  |
| OXR1    | 0.73272157 |
| OXSM    | 2.7908962  |
| OXSRI   | 1.5909674  |
| P2RX4   | 2.3019502  |
| P2RY13  | 2.5997422  |
| P2RY14  | 0.5526197  |
| P2RY2   | 4.5931835  |
| P2RY6   | 1.1358902  |
| P4HA2   | 1.2609274  |
| P4HB    | 3.9626305  |
| PA2G4   | 1.9683406  |



|          |            |
|----------|------------|
| PABPC1   | 1.881058   |
| PABPC4   | 2.2677324  |
| PABPN1   | 1.6825912  |
| PACRGL   | 0.5275848  |
| PACSIN1  | 0.48438478 |
| PACSIN3  | 3.0503552  |
| PADI1    | 0.76180744 |
| PAF1     | 1.6004822  |
| PAFAH1B1 | 1.5475886  |
| PAFAH1B2 | 1.9097605  |
| PAFAH2   | 2.7388933  |
| PAGR1A   | 1.0536592  |
| PAH      | 9.021723   |
| PAICS    | 2.226073   |
| PAIP1    | 1.2516048  |
| PAIP2    | 0.9439838  |
| PAIP2B   | 1.535703   |
| PAK1IP1  | 2.0071213  |
| PAK2     | 1.1297987  |
| PAK4     | 3.392911   |
| PALLD    | 0.6542342  |
| PAM16    | 2.2687948  |
| PAN2     | 1.8484185  |
| PAN3     | 0.793854   |
| PANK1    | 3.0313678  |
| PANK2    | 1.0902698  |
| PANK3    | 1.260118   |
| PANK4    | 1.5449622  |
| PAOX     | 1.2521203  |
| PAPD4    | 2.3586628  |
| PAPD5    | 1.281255   |
| PAPD7    | 1.2110465  |
| PAPOLA   | 1.665303   |
| PAPSS2   | 1.6438696  |
| PAQR9    | 4.1458015  |
| PARD3    | 0.54205155 |
| PARD6A   | 1.0185604  |
| PARG     | 1.324743   |
| PARK7    | 1.9238856  |
| PARL     | 1.7639616  |
| PARN     | 1.1583445  |
| PARP1    | 0.98652077 |
| PARP10   | 2.9386985  |
| PARP11   | 1.3443158  |
| PARP12   | 2.684183   |

|        |            |
|--------|------------|
| PARP14 | 2.5132825  |
| PARP16 | 4.1945515  |
| PARP2  | 1.5005543  |
| PARP3  | 1.208061   |
| PARP4  | 1.4097903  |
| PARP6  | 0.858402   |
| PARP8  | 0.74992204 |
| PARP9  | 3.1885397  |
| PARS2  | 0.56213355 |
| PARVA  | 0.56074834 |
| PATL1  | 1.9380586  |
| PAWR   | 2.9800942  |
| PAXBP1 | 1.3550808  |
| PBDC1  | 2.910569   |
| PBLD1  | 1.8551221  |
| PBLD2  | 3.6190116  |
| PBRM1  | 1.0543008  |
| PBX2   | 0.5853479  |
| PCBD1  | 3.9730318  |
| PCBD2  | 1.6828024  |
| PCBP1  | 2.0585368  |
| PCBP2  | 1.5739887  |
| PCBP4  | 1.6563475  |
| PCCA   | 1.6482027  |
| PCCB   | 1.6906028  |
| PCDH1  | 0.77837205 |
| PCED1A | 0.99643874 |
| PCF11  | 1.084563   |
| PCGF1  | 0.9875629  |
| PCGF3  | 1.1285403  |
| PCGF5  | 2.0357153  |
| PCGF6  | 3.5516798  |
| PCID2  | 2.392295   |
| PCK1   | 6.8706536  |
| PCM1   | 0.7789099  |
| PCMT1  | 1.7464416  |
| PCMTD1 | 1.8643687  |
| PCMTD2 | 0.85995746 |
| PCNA   | 0.6308806  |
| PCNXL3 | 1.605169   |
| PCSK5  | 1.545028   |
| PCSK6  | 3.870578   |
| PCSK9  | 4.7213154  |
| PCX    | 5.1158247  |
| PCYOX1 | 2.6419551  |

|         |            |
|---------|------------|
| PCYT1A  | 1.2622302  |
| PCYT2   | 3.9139907  |
| PDAP1   | 2.2973335  |
| PDCD10  | 2.446656   |
| PDCD2   | 2.2835925  |
| PDCD2L  | 1.6054184  |
| PDCD4   | 0.80448174 |
| PDCD5   | 2.149676   |
| PDCD6   | 2.3001935  |
| PDCD6IP | 2.5283835  |
| PDCD7   | 1.261728   |
| PDCL    | 1.0833457  |
| PDCL3   | 1.1989143  |
| PDE1B   | 0.46753716 |
| PDE2A   | 1.4008558  |
| PDE3B   | 2.2194622  |
| PDE4B   | 3.0515134  |
| PDE4C   | 1.4969532  |
| PDE4DIP | 2.2734754  |
| PDE6D   | 0.794986   |
| PDE6H   | 2.3316782  |
| PDE8A   | 0.28973413 |
| PDF     | 1.3167422  |
| PDGFC   | 2.6192052  |
| PDHA1   | 0.7887051  |
| PDHB    | 1.6534908  |
| PDHX    | 2.1881711  |
| PDIA3   | 3.0561764  |
| PDIA4   | 4.162307   |
| PDIA5   | 4.470992   |
| PDIA6   | 2.8604867  |
| PDILT   | 3.8192177  |
| PDK1    | 2.7813208  |
| PDK4    | 4.4373665  |
| PDLIM1  | 1.222614   |
| PDLIM7  | 1.7175648  |
| PDP2    | 1.3150039  |
| PDPK1   | 1.5819504  |
| PDPR    | 1.6510742  |
| PDRG1   | 0.56181645 |
| PDS5A   | 1.2697866  |
| PDS5B   | 0.5850527  |
| PDSS1   | 1.8779657  |
| PDSS2   | 1.3467164  |
| PDXDC1  | 0.4334061  |

|        |            |
|--------|------------|
| PDXK   | 1.3222396  |
| PDZD11 | 1.4299419  |
| PDZD8  | 1.7058449  |
| PDZK1  | 5.9404764  |
| PDZRN3 | 1.1095712  |
| PEBP1  | 1.9855301  |
| PECR   | 3.5442526  |
| PEF1   | 1.26563    |
| PEG3   | 1.2497962  |
| PELI1  | 0.9049127  |
| PELI2  | 0.5883379  |
| PELO   | 2.3969243  |
| PELP1  | 1.6862185  |
| PEMT   | 4.4690094  |
| PEPD   | 3.1711996  |
| PER1   | 2.3636954  |
| PERP   | 2.0515645  |
| PES1   | 1.8298967  |
| PET112 | 2.5540292  |
| PEX1   | 0.59674144 |
| PEX10  | 0.75190926 |
| PEX11A | 3.833194   |
| PEX11B | 2.21198    |
| PEX11G | 3.5415142  |
| PEX13  | 3.1836483  |
| PEX14  | 2.7298293  |
| PEX16  | 3.8588278  |
| PEX19  | 2.020871   |
| PEX2   | 2.3819153  |
| PEX26  | 1.7433712  |
| PEX3   | 2.267133   |
| PEX5   | 2.9486454  |
| PEX6   | 1.86714    |
| PEX7   | 2.6479776  |
| PFDN1  | 1.3438184  |
| PFDN2  | 1.6739929  |
| PFDN4  | 1.5645466  |
| PFKFB1 | 4.2010555  |
| PFKFB2 | 2.0583837  |
| PFKFB3 | 4.7890472  |
| PFKL   | 3.4031985  |
| PFN1   | 1.3386228  |
| PGAM1  | 3.5510633  |
| PGAM5  | 1.8295233  |
| PGAP2  | 0.5050638  |

|          |            |
|----------|------------|
| PGAP3    | 1.437494   |
| PGD      | 1.1767905  |
| PGGT1B   | 1.5222075  |
| PGK1     | 3.9687111  |
| PGLS     | 1.3771355  |
| PGLYRP2  | 5.7325354  |
| PGM1     | 1.5591757  |
| PGM2     | 3.8857358  |
| PGM3     | 2.639323   |
| PGP      | 0.957175   |
| PGPEP1   | 2.442983   |
| PGRMC1   | 2.50926    |
| PGRMC2   | 0.2594533  |
| PGS1     | 1.1092188  |
| PHACTR4  | 1.7755125  |
| PHB      | 1.7775872  |
| PHB2     | 2.3174999  |
| PHC1     | 0.3657415  |
| PHC2     | 0.3886311  |
| PHF1     | 0.5206344  |
| PHF10    | 2.213928   |
| PHF11A   | 2.7548187  |
| PHF11B   | 0.6886318  |
| PHF11C   | 1.4197023  |
| PHF11D   | 1.8085468  |
| PHF12    | 1.2258835  |
| PHF13    | 1.8186486  |
| PHF14    | 0.6679456  |
| PHF2     | 1.1560087  |
| PHF20    | 0.96231914 |
| PHF21A   | 0.7888038  |
| PHF23    | 1.9641025  |
| PHF3     | 1.5606716  |
| PHF5A    | 1.9914396  |
| PHF7     | 0.9765651  |
| PHF8     | 1.0553405  |
| PHIP     | 1.3937991  |
| PHKA2    | 0.47290778 |
| PHKG1    | 0.2606573  |
| PHKG2    | 1.7907774  |
| PHLDA1   | 1.6987927  |
| PHLPP1   | 0.5406923  |
| PHLPP2   | 0.35005713 |
| PHOSPHO2 | 1.2742288  |
| PHPT1    | 1.6757095  |

|         |            |
|---------|------------|
| PHRF1   | 1.0643675  |
| PHTF2   | 0.8163283  |
| PHYH    | 5.537959   |
| PHYHD1  | 1.8388045  |
| PHYKPL  | 1.5636036  |
| PI15    | 1.3536894  |
| PI4K2A  | 2.968105   |
| PI4K2B  | 0.32503676 |
| PI4KA   | 2.0997274  |
| PI4KB   | 0.93283916 |
| PIAS1   | 0.5166614  |
| PIAS2   | 2.438718   |
| PIAS4   | 1.3636434  |
| PICALM  | 1.9534128  |
| PICK1   | 1.2089112  |
| PID1    | 3.501335   |
| PIDD1   | 0.41691542 |
| PIF1    | 0.7540798  |
| PIGA    | 2.4261382  |
| PIGF    | 1.5358927  |
| PIGG    | 1.4131212  |
| PIGK    | 1.8078406  |
| PIGL    | 1.7892103  |
| PIGN    | 0.9589665  |
| PIGO    | 1.4052804  |
| PIGP    | 1.4431765  |
| PIGQ    | 0.809778   |
| PIGR    | 2.009463   |
| PIGS    | 1.403508   |
| PIGT    | 1.2118375  |
| PIGV    | 0.51109695 |
| PIGX    | 1.8327453  |
| PIGYL   | 1.3684142  |
| PIH1D1  | 1.727143   |
| PIK3AP1 | 1.1979702  |
| PIK3C2A | 2.1221247  |
| PIK3C2G | 1.2288325  |
| PIK3CA  | 0.46694255 |
| PIK3CB  | 1.1492751  |
| PIK3R1  | 0.5093167  |
| PIK3R2  | 1.1095321  |
| PIK3R4  | 1.430979   |
| PIK3R5  | 1.5761268  |
| PILRA   | 1.4079792  |
| PILRB2  | 1.1173773  |

|            |            |
|------------|------------|
| PIM1       | 2.586098   |
| PIM2       | 0.73392415 |
| PIM3       | 3.1566513  |
| PIN1       | 1.713218   |
| PIN1RT1    | 1.5411041  |
| PIN4       | 1.5566013  |
| PINX1      | 1.7091911  |
| PIP4K2C    | 1.3395283  |
| PIP5K1A    | 7.522791   |
| PIPOX      | 6.094598   |
| PIR        | 1.1079638  |
| PIRA11     | 1.2350781  |
| PIRA2      | 2.5451639  |
| PIRA6      | 1.7246511  |
| PIRA7      | 1.738179   |
| PIRB       | 2.0215352  |
| PISD       | 1.2734697  |
| PISD-PS1   | 1.1830971  |
| PITHD1     | 0.9270823  |
| PITPNA     | 1.2087667  |
| PITPNB     | 1.4665473  |
| PITPNC1    | 0.7245729  |
| PITPNM1    | 0.5940659  |
| PITPNM2OS1 | 1.2686098  |
| PITRM1     | 2.6940844  |
| PJA1       | 1.7370765  |
| PJA2       | 0.92537    |
| PKDCC      | 3.7382295  |
| PKLR       | 2.4850745  |
| PKM        | 2.0325072  |
| PKN1       | 1.1251843  |
| PKN2       | 1.9781201  |
| PKNOX1     | 2.4055226  |
| PKP1       | 1.8382609  |
| PKP2       | 2.3348958  |
| PKP3       | 1.1880424  |
| PLA1A      | 6.3308983  |
| PLA2G12A   | 3.1482728  |
| PLA2G12B   | 5.9600487  |
| PLA2G4A    | 0.8750818  |
| PLA2G4B    | 1.7901156  |
| PLA2G6     | 2.0378654  |
| PLA2G7     | 2.3196738  |
| PLAA       | 2.5786054  |
| PLAC8      | 1.2046134  |

|         |            |
|---------|------------|
| PLAGL2  | 0.6225481  |
| PLAUR   | 1.3766739  |
| PLBD1   | 2.8011     |
| PLBD2   | 2.049772   |
| PLCD4   | 1.5099151  |
| PLCE1   | 0.5499563  |
| PLCL1   | 0.6296067  |
| PLCL2   | 1.2538645  |
| PLCXD1  | 0.79528093 |
| PLCXD2  | 6.076438   |
| PLD1    | 1.726877   |
| PLEC    | 1.8580372  |
| PLEK    | 1.1361353  |
| PLEKHA3 | 2.336929   |
| PLEKHA4 | 1.5366123  |
| PLEKHA5 | 1.3252361  |
| PLEKHA6 | 0.8998711  |
| PLEKHA8 | 2.0718396  |
| PLEKHF2 | 0.74678206 |
| PLEKHG2 | 0.25638938 |
| PLEKHG3 | 3.5436785  |
| PLEKHG4 | 4.9198055  |
| PLEKHH1 | 0.6834781  |
| PLEKHJ1 | 1.8436933  |
| PLEKHM1 | 1.8915598  |
| PLEKHM2 | 1.5130951  |
| PLEKHS1 | 2.7932723  |
| PLG     | 7.6522865  |
| PLIN2   | 4.6030707  |
| PLIN3   | 2.3672173  |
| PLIN4   | 3.7955854  |
| PLIN5   | 6.522341   |
| PLK3    | 6.301262   |
| PLOD3   | 1.7491148  |
| PLRG1   | 2.288779   |
| PLSCR1  | 3.9455392  |
| PLXNA1  | 0.93429303 |
| PLXNA2  | 1.0558026  |
| PLXNB1  | 1.8725169  |
| PLXNB2  | 1.604142   |
| PM20D1  | 1.5183196  |
| PMAIP1  | 0.6214988  |
| PMF1    | 1.1993606  |
| PML     | 2.0327504  |
| PMM2    | 2.077223   |



|         |            |
|---------|------------|
| PMPCA   | 2.4401782  |
| PMPCB   | 3.02401    |
| PMS1    | 1.4431236  |
| PMVK    | 1.5479476  |
| PNISR   | 0.69398236 |
| PNKD    | 0.46399283 |
| PNKP    | 1.6162708  |
| PNMA2   | 1.1595333  |
| PNN     | 0.8245323  |
| PNO1    | 3.056155   |
| PNP     | 3.9839323  |
| PNP2    | 0.5746398  |
| PNPLA2  | 2.432185   |
| PNPLA6  | 1.0874331  |
| PNPLA7  | 3.4673536  |
| PNPO    | 3.5234458  |
| PNPT1   | 2.5622542  |
| PNRC1   | 3.8150284  |
| PNRC2   | 1.2302387  |
| POC1B   | 0.42278337 |
| POC5    | 1.513005   |
| POFUT1  | 0.7295835  |
| POFUT2  | 0.333807   |
| POGK    | 0.9634192  |
| POGLUT1 | 1.6096876  |
| POGZ    | 1.7265916  |
| POLA2   | 0.9918723  |
| POLB    | 1.9440134  |
| POLD2   | 0.6042123  |
| POLD3   | 0.9430487  |
| POLD4   | 1.0869629  |
| POLDIP2 | 1.7352026  |
| POLDIP3 | 1.2577636  |
| POLE3   | 0.8583977  |
| POLE4   | 3.401868   |
| POLG    | 1.7962263  |
| POLH    | 0.3481803  |
| POLL    | 0.91688514 |
| POLM    | 0.88034844 |
| POLR1A  | 2.5246136  |
| POLR1B  | 1.1209333  |
| POLR1C  | 2.149605   |
| POLR1D  | 1.1070569  |
| POLR1E  | 2.2104166  |
| POLR2B  | 1.7053254  |

|          |            |
|----------|------------|
| POLR2C   | 1.4214952  |
| POLR2E   | 0.5859287  |
| POLR2F   | 1.5216639  |
| POLR2G   | 0.91713357 |
| POLR2H   | 1.7966096  |
| POLR2I   | 0.9085214  |
| POLR2J   | 1.4854605  |
| POLR2K   | 1.3728502  |
| POLR2L   | 2.2259858  |
| POLR2M   | 1.2208822  |
| POLR3A   | 1.729563   |
| POLR3B   | 1.4091523  |
| POLR3C   | 1.8230846  |
| POLR3D   | 3.1320298  |
| POLR3E   | 1.2241645  |
| POLR3G   | 0.27144122 |
| POLR3GL  | 0.77629685 |
| POLR3K   | 0.4995072  |
| POLRMT   | 2.3502886  |
| POM121   | 1.4967191  |
| POMGNT1  | 1.4741156  |
| POMGNT2  | 0.60088086 |
| POMK     | 0.8137908  |
| POMP     | 1.6065252  |
| POMT1    | 0.6639726  |
| POMT2    | 1.6113484  |
| PON1     | 3.747481   |
| PON2     | 0.73412895 |
| PON3     | 1.2146094  |
| POP1     | 0.7590058  |
| POP4     | 1.53665    |
| POP5     | 1.8087051  |
| POP7     | 1.5931699  |
| POR      | 3.284744   |
| POT1A    | 3.096863   |
| POU2F2   | 0.5081842  |
| POU5F2   | 0.534044   |
| POU6F1   | 0.9338629  |
| PPA1     | 4.607114   |
| PPA2     | 1.1527407  |
| PPAN     | 2.5259583  |
| PPAP2A   | 0.39546323 |
| PPAP2B   | 1.3741362  |
| PPAP2C   | 3.6151998  |
| PPAPDC1B | 3.4203203  |

|          |            |
|----------|------------|
| PPAPDC2  | 0.74792695 |
| PPARA    | 3.8113139  |
| PPARD    | 0.8829863  |
| PPARG    | 1.2625077  |
| PPARGC1A | 4.914756   |
| PPAT     | 1.698837   |
| PPCS     | 1.5607722  |
| PPDPF    | 0.26591086 |
| PPFIA1   | 1.2317398  |
| PPFIA3   | 1.6476197  |
| PPFIBP1  | 1.2242692  |
| PPFIBP2  | 1.1558893  |
| PPIA     | 1.8299265  |
| PPIB     | 2.717601   |
| PPID     | 0.95958686 |
| PPIF     | 3.5185144  |
| PPIFOS   | 1.5601342  |
| PPIG     | 1.2247293  |
| PPIL1    | 0.4278798  |
| PPIL3    | 0.97152305 |
| PPIL4    | 1.2823107  |
| PPIP5K1  | 0.8803439  |
| PPIP5K2  | 2.719528   |
| PPM1A    | 0.5904834  |
| PPM1B    | 2.014663   |
| PPM1F    | 0.60616803 |
| PPM1G    | 1.2304537  |
| PPM1H    | 1.2994473  |
| PPM1K    | 2.0104158  |
| PPM1L    | 2.6029594  |
| PPME1    | 2.3451807  |
| PPNR     | 1.549412   |
| PPP1CA   | 0.9332497  |
| PPP1CB   | 0.9127495  |
| PPP1CC   | 1.2954338  |
| PPP1R11  | 2.011823   |
| PPP1R12A | 0.6439645  |
| PPP1R12C | 1.005564   |
| PPP1R13L | 2.0668304  |
| PPP1R14B | 1.6989739  |
| PPP1R15A | 2.1562707  |
| PPP1R15B | 0.4890535  |
| PPP1R16A | 1.6406305  |
| PPP1R21  | 1.6387699  |
| PPP1R35  | 0.78130555 |

|         |            |
|---------|------------|
| PPP1R37 | 1.0697248  |
| PPP1R3B | 2.8555357  |
| PPP1R3G | 9.031089   |
| PPP1R7  | 1.9361613  |
| PPP2CA  | 1.9027636  |
| PPP2CB  | 1.0935705  |
| PPP2R1A | 1.3852398  |
| PPP2R1B | 0.60673356 |
| PPP2R2A | 1.5098298  |
| PPP2R2D | 2.8114069  |
| PPP2R3C | 2.0675762  |
| PPP2R4  | 0.75296474 |
| PPP2R5A | 0.4089396  |
| PPP2R5B | 2.0692642  |
| PPP2R5D | 0.8324306  |
| PPP3CC  | 0.6255996  |
| PPP3R1  | 0.82769036 |
| PPP4C   | 1.2148144  |
| PPP4R1  | 1.7557318  |
| PPP4R2  | 1.1886289  |
| PPP4R4  | 1.0786502  |
| PPP5C   | 1.191756   |
| PPP6C   | 1.5801198  |
| PPP6R1  | 0.68478656 |
| PPP6R3  | 1.3943594  |
| PPRC1   | 2.2763364  |
| PPT1    | 1.0719364  |
| PPT2    | 1.5778635  |
| PPTC7   | 1.5240958  |
| PQBP1   | 0.60917616 |
| PQLC1   | 1.3405569  |
| PQLC2   | 5.0406504  |
| PRAMEF8 | 1.5161917  |
| PRCC    | 0.6054399  |
| PRDM2   | 0.8624928  |
| PRDM4   | 1.7390139  |
| PRDX1   | 2.7438796  |
| PRDX2   | 0.97061944 |
| PRDX3   | 2.9451244  |
| PRDX4   | 2.3419235  |
| PRDX5   | 3.5195863  |
| PREB    | 3.1238377  |
| PRELID1 | 1.3173325  |
| PRELID2 | 5.0426283  |
| PREPL   | 1.4658058  |

|          |            |
|----------|------------|
| PRG4     | 7.104583   |
| PRICKLE3 | 0.74920344 |
| PRIM1    | 1.0932786  |
| PRIMPOL  | 0.66586757 |
| PRKAA1   | 1.036577   |
| PRKAA2   | 2.2955096  |
| PRKAB2   | 0.8194208  |
| PRKACB   | 0.8865001  |
| PRKAG1   | 1.3975909  |
| PRKAG2   | 0.9413302  |
| PRKAR1A  | 2.418461   |
| PRKAR2A  | 0.8401141  |
| PRKCB    | 1.8187664  |
| PRKCSH   | 3.1988218  |
| PRKD3    | 0.7040713  |
| PRKDC    | 0.8393569  |
| PRKRIP1  | 1.3620055  |
| PRKRIR   | 0.5234699  |
| PRLR     | 3.6236238  |
| PRMT1    | 1.4519479  |
| PRMT10   | 1.7733562  |
| PRMT3    | 2.0789807  |
| PRMT5    | 1.4099095  |
| PRMT7    | 1.673342   |
| PRNP     | 0.9483168  |
| PROC     | 8.430636   |
| PROCR    | 5.4188013  |
| PRODH    | 3.205177   |
| PRODH2   | 5.5446587  |
| PROK2    | 4.560918   |
| PRORS1   | 2.4655912  |
| PROSC    | 3.05838    |
| PROSER2  | 1.2364166  |
| PROX1    | 4.9716415  |
| PROZ     | 6.116661   |
| PRPF18   | 1.0038273  |
| PRPF19   | 2.226928   |
| PRPF3    | 0.5628803  |
| PRPF31   | 1.8362544  |
| PRPF38A  | 1.8089693  |
| PRPF38B  | 1.4029062  |
| PRPF39   | 1.3780646  |
| PRPF4    | 1.1975677  |
| PRPF40A  | 2.8688185  |
| PRPF40B  | 0.3980186  |

|         |            |
|---------|------------|
| PRPF4B  | 1.4107928  |
| PRPF6   | 2.3354466  |
| PRPF8   | 1.4500463  |
| PRPS1   | 1.927243   |
| PRPS1L3 | 1.3897645  |
| PRPSAP1 | 2.1291125  |
| PRPSAP2 | 0.9778893  |
| PRR14   | 1.0604174  |
| PRR14L  | 1.4976509  |
| PRR16   | 2.4403331  |
| PRR24   | 0.7982924  |
| PRRC1   | 0.5624025  |
| PRRC2A  | 1.0216191  |
| PRRC2C  | 1.0272291  |
| PRRG2   | 1.0289204  |
| PRSS29  | 0.4670329  |
| PRSS37  | 1.5411704  |
| PRSS51  | 2.515652   |
| PSAP    | 0.6529629  |
| PSAT1   | 1.9521296  |
| PSD     | 0.43827796 |
| PSD3    | 1.2721565  |
| PSEN1   | 2.613765   |
| PSEN2   | 2.723194   |
| PSENEEN | 1.661402   |
| PSG16   | 0.7954619  |
| PSG23   | 4.1755323  |
| PSG-PS1 | 2.049845   |
| PSIP1   | 0.66631436 |
| PSMA1   | 2.3598735  |
| PSMA2   | 1.8246934  |
| PSMA3   | 1.9681704  |
| PSMA4   | 2.5531738  |
| PSMA5   | 2.493365   |
| PSMA6   | 2.3955052  |
| PSMA7   | 2.702419   |
| PSMB1   | 1.6063979  |
| PSMB10  | 2.7331088  |
| PSMB2   | 1.5918543  |
| PSMB3   | 1.8156049  |
| PSMB4   | 1.7072346  |
| PSMB5   | 2.2803075  |
| PSMB6   | 2.009318   |
| PSMB7   | 2.3617456  |
| PSMB8   | 1.600395   |

|         |            |
|---------|------------|
| PSMB9   | 2.2254703  |
| PSMC1   | 2.2352288  |
| PSMC2   | 2.6010034  |
| PSMC3   | 1.9042923  |
| PSMC4   | 2.6416142  |
| PSMC5   | 1.7622168  |
| PSMC6   | 2.3521645  |
| PSMD1   | 2.3744128  |
| PSMD10  | 2.3901713  |
| PSMD11  | 2.5178082  |
| PSMD12  | 3.0432336  |
| PSMD13  | 2.0882323  |
| PSMD14  | 2.1390703  |
| PSMD2   | 2.5317767  |
| PSMD3   | 2.6707065  |
| PSMD4   | 2.5235574  |
| PSMD5   | 1.5384433  |
| PSMD6   | 2.3541062  |
| PSMD7   | 2.1885955  |
| PSMD8   | 3.10621    |
| PSMD9   | 2.8612554  |
| PSME1   | 1.9957645  |
| PSME2B  | 2.051069   |
| PSME3   | 3.5088704  |
| PSME4   | 2.0488274  |
| PSMF1   | 1.9789069  |
| PSMG1   | 2.0415533  |
| PSMG2   | 0.4870937  |
| PSMG3   | 1.7633274  |
| PSMG4   | 2.3197815  |
| PSPC1   | 2.9129627  |
| PSPH    | 0.9960487  |
| PSTPIP2 | 1.4007766  |
| PTAR1   | 1.0098834  |
| PTBP1   | 2.1304715  |
| PTBP3   | 1.2190711  |
| PTCD2   | 1.6966641  |
| PTCD3   | 2.1929572  |
| PTCH2   | 0.95438886 |
| PTDSS1  | 0.6681144  |
| PTEN    | 1.3819973  |
| PTER    | 4.6712017  |
| PTGES   | 2.0395505  |
| PTGES2  | 3.401333   |
| PTGES3  | 1.828512   |

|         |            |
|---------|------------|
| PTGR2   | 0.8248193  |
| PTGS2   | 1.7139003  |
| PTH2R   | 1.8393326  |
| PTMA    | 0.6118953  |
| PTP4A1  | 4.686947   |
| PTP4A2  | 0.6018536  |
| PTPLA   | 2.028054   |
| PTPLAD1 | 1.9472568  |
| PTPLB   | 3.4200246  |
| PTPMT1  | 2.485534   |
| PTPN11  | 1.483566   |
| PTPN12  | 1.3500817  |
| PTPN2   | 3.131045   |
| PTPN21  | 1.2872312  |
| PTPN22  | 1.5000999  |
| PTPN23  | 3.028694   |
| PTPN3   | 2.9551356  |
| PTPN5   | 0.8682864  |
| PTPN6   | 1.1114142  |
| PTPRA   | 0.771507   |
| PTPRF   | 0.5449264  |
| PTPRJ   | 0.8756354  |
| PTRH1   | 1.9548671  |
| PTRH2   | 0.69217324 |
| PTRHD1  | 1.5816963  |
| PTS     | 0.8277893  |
| PTTG1IP | 1.6291721  |
| PTX3    | 1.8712857  |
| PUF60   | 1.3949983  |
| PUM1    | 1.131715   |
| PUM2    | 1.0941813  |
| PURB    | 0.57526183 |
| PUS1    | 2.6845667  |
| PUS10   | 2.0443928  |
| PUS3    | 1.4562447  |
| PUS7    | 1.5720341  |
| PUS7L   | 0.6648452  |
| PUSL1   | 1.3595941  |
| PVR     | 3.5604532  |
| PVRL1   | 2.266711   |
| PVRL2   | 1.5727742  |
| PWP1    | 2.5293553  |
| PWP2    | 2.306999   |
| PXDC1   | 1.6146057  |
| PXK     | 2.1700997  |



|           |            |
|-----------|------------|
| PXMP2     | 3.0302618  |
| PXMP4     | 2.672866   |
| PXN       | 0.4828465  |
| PYCARD    | 0.4968822  |
| PYCRL     | 1.041569   |
| PYDC3     | 1.3454185  |
| PYGL      | 1.2082922  |
| PYGO2     | 1.6501024  |
| PYHIN1    | 1.3129101  |
| PYROXD2   | 1.8637674  |
| PYURF     | 0.90133643 |
| PZP       | 7.5044346  |
| QARS      | 2.2405107  |
| QDPR      | 1.9218433  |
| QPCT      | 2.4410121  |
| QPCTL     | 2.77722    |
| QPRT      | 5.4057293  |
| QRICH1    | 1.4220002  |
| QRSL1     | 1.9945292  |
| QSER1     | 0.7641573  |
| QSOX1     | 4.765438   |
| QTRTD1    | 2.4523582  |
| R3HCC1    | 1.4506514  |
| R3HCC1L   | 1.2189815  |
| R3HDM1    | 1.704005   |
| R3HDM2    | 1.3761308  |
| RAB1      | 2.8238857  |
| RAB10     | 1.3667014  |
| RAB11A    | 1.990011   |
| RAB11B    | 0.87519765 |
| RAB11FIP4 | 0.33147144 |
| RAB12     | 0.39371657 |
| RAB13     | 0.8455162  |
| RAB14     | 1.0101969  |
| RAB17     | 0.46514773 |
| RAB18     | 2.0244634  |
| RAB1B     | 0.7204282  |
| RAB20     | 1.7706454  |
| RAB21     | 1.2232432  |
| RAB22A    | 2.4195173  |
| RAB23     | 0.3226006  |
| RAB24     | 2.294884   |
| RAB26OS   | 3.2370038  |
| RAB28     | 0.7721484  |
| RAB2A     | 1.4987581  |

|          |            |
|----------|------------|
| RAB2B    | 0.691201   |
| RAB30    | 3.6369317  |
| RAB31    | 0.9241369  |
| RAB32    | 2.6956232  |
| RAB33B   | 1.1118886  |
| RAB35    | 1.7226393  |
| RAB36    | 0.8042989  |
| RAB3C    | 1.1158984  |
| RAB3GAP1 | 2.046744   |
| RAB3GAP2 | 2.060345   |
| RAB3IP   | 2.0243375  |
| RAB40C   | 1.6556919  |
| RAB43    | 2.2036917  |
| RAB4A    | 1.8695166  |
| RAB4B    | 1.7033517  |
| RAB5A    | 2.1403172  |
| RAB5B    | 0.65530705 |
| RAB5C    | 0.5750773  |
| RAB6A    | 1.7413356  |
| RAB7     | 3.529906   |
| RAB7L1   | 0.67803645 |
| RAB8A    | 1.5910599  |
| RAB9     | 2.3911397  |
| RABAC1   | 0.90360093 |
| RABEP1   | 1.3490818  |
| RABEP2   | 0.81304574 |
| RABEPK   | 0.97407126 |
| RABGEF1  | 1.2795198  |
| RABGGTA  | 1.5579095  |
| RABGGTB  | 2.40188    |
| RABIF    | 1.0141196  |
| RABL2    | 0.6136904  |
| RABL3    | 2.7322567  |
| RAC1     | 1.4253738  |
| RAC2     | 1.3408573  |
| RAD1     | 0.7695582  |
| RAD17    | 2.5590289  |
| RAD18    | 2.3237355  |
| RAD21    | 0.91627955 |
| RAD23B   | 2.5544674  |
| RAD51B   | 1.5853989  |
| RAD51C   | 3.1553295  |
| RAD51D   | 0.49197197 |
| RAD52    | 1.8163688  |
| RAD54L2  | 1.8310437  |

|          |            |
|----------|------------|
| RAE1     | 1.9624527  |
| RAF1     | 1.4819534  |
| RAI1     | 0.654299   |
| RALA     | 1.149101   |
| RALB     | 1.2436302  |
| RALGAPA1 | 0.6790805  |
| RALGAPA2 | 1.7251947  |
| RALGAPB  | 0.5383575  |
| RALGDS   | 2.7592394  |
| RALGPS1  | 2.9343917  |
| RALGPS2  | 2.0468047  |
| RALY     | 0.6735909  |
| RAN      | 2.4012926  |
| RANBP1   | 1.9975336  |
| RANBP10  | 1.5811851  |
| RANBP2   | 1.974982   |
| RANBP3   | 2.6294482  |
| RANBP9   | 1.6687362  |
| RANGAP1  | 2.8662202  |
| RAP1B    | 0.7693126  |
| RAP1GAP  | 0.4388864  |
| RAP1GDS1 | 0.92709184 |
| RAP2A    | 0.38059402 |
| RAPGEF2  | 2.285519   |
| RAPGEF4  | 3.472611   |
| RAPGEF6  | 0.89774585 |
| RAPH1    | 4.3026342  |
| RAPSN    | 0.7813189  |
| RARRES1  | 3.2198594  |
| RARRES2  | 2.283332   |
| RARS     | 2.7950845  |
| RARS2    | 2.0391548  |
| RASA1    | 0.71719384 |
| RASA2    | 0.66416955 |
| RASA4    | 1.6421449  |
| RASAL1   | 4.669737   |
| RASD1    | 4.654708   |
| RASD2    | 1.2901237  |
| RASGEF1B | 3.8836105  |
| RASIP1   | 0.39412284 |
| RASL2-9  | 2.493758   |
| RASSF1   | 1.5326211  |
| RASSF4   | 1.3902495  |
| RASSF5   | 0.73909783 |
| RASSF6   | 2.294602   |

|         |            |
|---------|------------|
| RB1     | 0.46425748 |
| RBAK    | 1.105835   |
| RBBP4   | 0.966882   |
| RBBP5   | 1.8421652  |
| RBBP6   | 1.6521094  |
| RBBP7   | 1.4638832  |
| RBBP8   | 1.132314   |
| RBBP9   | 0.4981234  |
| RBCK1   | 1.9652832  |
| RBFA    | 1.1780179  |
| RBFOX2  | 1.7861941  |
| RBKS    | 3.6787412  |
| RBM10   | 1.678704   |
| RBM12   | 1.3781831  |
| RBM12B1 | 2.298841   |
| RBM14   | 1.4303696  |
| RBM15   | 3.3732512  |
| RBM17   | 2.3158991  |
| RBM18   | 1.3759019  |
| RBM19   | 2.6867626  |
| RBM22   | 1.3936062  |
| RBM25   | 1.3612173  |
| RBM26   | 1.7142231  |
| RBM27   | 1.5015888  |
| RBM28   | 1.3526189  |
| RBM3    | 1.9300044  |
| RBM33   | 3.1203868  |
| RBM34   | 1.57781    |
| RBM39   | 1.5383928  |
| RBM3OS  | 2.4141047  |
| RBM4    | 2.0141876  |
| RBM42   | 1.9040916  |
| RBM43   | 0.7466996  |
| RBM45   | 1.2918344  |
| RBM47   | 1.5165999  |
| RBM48   | 1.3393126  |
| RBM4B   | 2.6769326  |
| RBM5    | 0.87475324 |
| RBM6    | 1.0349925  |
| RBM7    | 1.1731217  |
| RBM8A   | 1.65889    |
| RBMS1   | 1.1523197  |
| RBMX    | 1.3072264  |
| RBMXL1  | 1.3288519  |
| RBP4    | 6.488577   |

|        |            |
|--------|------------|
| BPMS   | 1.0471327  |
| BPMS2  | 3.4889023  |
| RBX1   | 1.3042257  |
| RC3H1  | 0.77436566 |
| RC3H2  | 1.1963108  |
| RCAN1  | 3.113497   |
| RCAN2  | 1.9588883  |
| RCBTB1 | 2.027078   |
| RCBTB2 | 1.1933653  |
| RCC2   | 1.9235704  |
| RCCD1  | 0.7887912  |
| RCE1   | 0.95727897 |
| RCHY1  | 2.1950295  |
| RCL1   | 6.009879   |
| RCN1   | 0.41977715 |
| RCOR1  | 1.0641544  |
| RCOR3  | 0.68600535 |
| RDH1   | 2.2550294  |
| RDH10  | 1.5151751  |
| RDH11  | 2.6415904  |
| RDH12  | 0.5997617  |
| RDH13  | 2.0406709  |
| RDH14  | 2.7128656  |
| RDH5   | 4.5128326  |
| RDH7   | 4.526211   |
| RDH9   | 2.7902296  |
| RDX    | 1.0065596  |
| REC114 | 0.7272408  |
| RECQL5 | 0.38789225 |
| REEP3  | 2.522476   |
| REEP4  | 0.5774591  |
| REEP6  | 2.6892688  |
| REG3B  | 10.502556  |
| REG3G  | 1.6734273  |
| RELA   | 2.9477847  |
| RELB   | 1.4823511  |
| RELL1  | 2.0741994  |
| REN1   | 1.0357554  |
| REN2   | 5.1134815  |
| RENBP  | 0.42809796 |
| REPIN1 | 2.8600261  |
| REPS1  | 2.1141899  |
| REPS2  | 1.1605084  |
| RER1   | 2.0355318  |
| REST   | 1.2875826  |

|         |            |
|---------|------------|
| RETSAT  | 3.6918662  |
| REV3L   | 0.90564656 |
| REXO1   | 1.8215015  |
| REXO2   | 1.8904445  |
| REXO4   | 1.728677   |
| RFC1    | 1.048096   |
| RFC2    | 0.9794848  |
| RFC5    | 0.8993013  |
| RFK     | 0.9872768  |
| RFT1    | 2.2952678  |
| RFTN1   | 0.5175612  |
| RFWD2   | 1.5294015  |
| RFWD3   | 1.496392   |
| RFX1    | 0.65547824 |
| RFX5    | 1.1449742  |
| RFXANK  | 0.8401687  |
| RFXAP   | 0.5189786  |
| RGL1    | 0.60117316 |
| RGL3    | 3.6458657  |
| RGN     | 6.7069407  |
| RGS1    | 2.7510073  |
| RGS16   | 6.753647   |
| RGS20   | 1.2121861  |
| RGS4    | 0.44319558 |
| RGS5    | 4.0777664  |
| RHBDD2  | 1.877734   |
| RHBDD3  | 1.9830086  |
| RHBDF1  | 1.0187595  |
| RHBDF2  | 2.626396   |
| RHBDL1  | 0.47936726 |
| RHBG    | 2.3086975  |
| RHEB    | 1.3739245  |
| RHEBL1  | 1.0398998  |
| RHNO1   | 0.89901924 |
| RHOA    | 0.5634415  |
| RHOB    | 0.85016704 |
| RHOBTB1 | 1.6992977  |
| RHOBTB2 | 0.403167   |
| RHOBTB3 | 1.1643541  |
| RHOC    | 2.7403939  |
| RHOD    | 3.2909858  |
| RHOG    | 0.35139441 |
| RHOQ    | 1.734669   |
| RHOT1   | 1.2138493  |
| RHOT2   | 1.3155258  |

|          |            |
|----------|------------|
| RHOU     | 4.5693045  |
| RHOX8    | 1.9959018  |
| RIBC1    | 2.008474   |
| RIC8     | 1.6733234  |
| RIC8B    | 0.6782658  |
| RICTOR   | 1.8903568  |
| RIF1     | 1.1205864  |
| RILP     | 1.8749435  |
| RILPL2   | 1.6488588  |
| RINT1    | 2.0257585  |
| RIOK1    | 0.9713557  |
| RIOK2    | 2.6166875  |
| RIOK3    | 1.83763    |
| RIPK1    | 2.6817415  |
| RIPK2    | 3.9448712  |
| RIPK3    | 2.0395086  |
| RIPK4    | 0.693877   |
| RIT1     | 1.3138702  |
| RLF      | 2.149999   |
| RLIM     | 1.6567647  |
| RMDN1    | 3.6733387  |
| RMDN2    | 0.35167623 |
| RMDN3    | 3.0224006  |
| RMND1    | 2.3859107  |
| RMND5A   | 0.8924515  |
| RMND5B   | 1.0467997  |
| RMRP     | 0.545511   |
| RN18S    | 1.7223043  |
| RN28S1   | 1.9589539  |
| RN4.5S   | 2.4602757  |
| RN45S    | 1.9349606  |
| RNASE10  | 0.9978354  |
| RNASE13  | 2.6955366  |
| RNASE4   | 3.7178028  |
| RNASEH1  | 1.3484895  |
| RNASEH2A | 1.5484023  |
| RNASEH2B | 1.8868349  |
| RNASEK   | 1.314182   |
| RNASET2A | 1.3980033  |
| RND1     | 6.654503   |
| RND3     | 2.3525217  |
| RNF10    | 1.5894482  |
| RNF103   | 2.304242   |
| RNF11    | 1.8166487  |
| RNF111   | 1.6565406  |

|           |            |
|-----------|------------|
| RNF113A1  | 0.81844115 |
| RNF113A2  | 2.368056   |
| RNF114    | 1.8111432  |
| RNF115    | 1.4271591  |
| RNF121    | 1.4059069  |
| RNF123    | 2.59535    |
| RNF125    | 5.244853   |
| RNF126    | 0.29663348 |
| RNF128    | 5.142874   |
| RNF13     | 2.060363   |
| RNF130    | 2.0800889  |
| RNF135    | 1.4341352  |
| RNF138    | 1.5348585  |
| RNF138RT1 | 3.5747187  |
| RNF139    | 1.5123551  |
| RNF14     | 2.4340842  |
| RNF146    | 1.0053847  |
| RNF149    | 3.9909418  |
| RNF152    | 1.4634507  |
| RNF167    | 0.6803739  |
| RNF168    | 0.9319961  |
| RNF169    | 1.9528043  |
| RNF170    | 0.99897265 |
| RNF181    | 0.6203196  |
| RNF185    | 2.4069426  |
| RNF187    | 0.7437732  |
| RNF19A    | 0.9766834  |
| RNF19B    | 2.167806   |
| RNF2      | 1.4500611  |
| RNF213    | 3.082947   |
| RNF214    | 0.9026108  |
| RNF215    | 0.5540812  |
| RNF216    | 1.5482051  |
| RNF217    | 2.8236892  |
| RNF220    | 1.1183803  |
| RNF224    | 0.46284962 |
| RNF24     | 1.378334   |
| RNF25     | 0.6618378  |
| RNF26     | 1.2274592  |
| RNF31     | 1.4889987  |
| RNF34     | 0.8525965  |
| RNF4      | 2.2152994  |
| RNF40     | 3.1497443  |
| RNF41     | 0.8652072  |
| RNF43     | 0.42505145 |



|         |            |
|---------|------------|
| RNF44   | 1.2544677  |
| RNF5    | 0.75418687 |
| RNF6    | 1.4554074  |
| RNF7    | 1.3937795  |
| RNF8    | 1.0510566  |
| RNFT1   | 1.9664619  |
| RNGTT   | 0.7394674  |
| RNH1    | 1.8476737  |
| RNLS    | 0.5466826  |
| RNMT    | 1.6766679  |
| RNMTL1  | 0.6992619  |
| RNPC3   | 1.5800211  |
| RNPEP   | 1.1039755  |
| RNPEPL1 | 0.7693436  |
| RNPS1   | 1.6210535  |
| RNU12   | 0.94806504 |
| RNU1B6  | 1.3751953  |
| RNU2-10 | 1.3157852  |
| RNU3B1  | 2.6677797  |
| ROCK1   | 0.43993497 |
| ROM1    | 0.6369698  |
| ROMO1   | 1.9083116  |
| ROPN1L  | 2.387439   |
| RORA    | 1.9050133  |
| RORC    | 1.7299197  |
| RP9     | 2.300001   |
| RPA1    | 0.5203688  |
| RPA2    | 1.0036864  |
| RPAIN   | 2.3023975  |
| RPAP1   | 1.470257   |
| RPAP2   | 2.137521   |
| RPAP3   | 4.711795   |
| RPE     | 1.3650429  |
| RPF1    | 1.8871748  |
| RPF2    | 2.756356   |
| RPGRIP1 | 1.4711993  |
| RPL10   | 1.8148565  |
| RPL10A  | 2.2398138  |
| RPL11   | 1.6336162  |
| RPL12   | 1.8017728  |
| RPL13   | 1.4312007  |
| RPL13A  | 1.5129292  |
| RPL14   | 0.9005172  |
| RPL15   | 1.6629698  |
| RPL17   | 1.547971   |

|            |            |
|------------|------------|
| RPL18      | 1.7334483  |
| RPL18A     | 1.2940538  |
| RPL19      | 1.7108319  |
| RPL21      | 1.2656877  |
| RPL22      | 1.4696724  |
| RPL22L1    | 2.622699   |
| RPL23      | 1.3922422  |
| RPL23A     | 1.0933573  |
| RPL24      | 1.3552201  |
| RPL26      | 1.3503673  |
| RPL27      | 1.4520681  |
| RPL27A     | 1.5461714  |
| RPL28      | 1.4437006  |
| RPL29      | 1.5623324  |
| RPL3       | 1.675545   |
| RPL30      | 1.1137993  |
| RPL31      | 1.2279556  |
| RPL31-PS12 | 1.1651661  |
| RPL32      | 0.6523187  |
| RPL34      | 1.5049684  |
| RPL34-PS1  | 0.91723895 |
| RPL35      | 1.4430418  |
| RPL35A     | 1.2971017  |
| RPL36      | 1.6406338  |
| RPL36A     | 1.6566584  |
| RPL36AL    | 2.3121736  |
| RPL37A     | 1.573554   |
| RPL38      | 1.8168449  |
| RPL39      | 1.4521492  |
| RPL39L     | 1.5682368  |
| RPL4       | 1.881005   |
| RPL41      | 2.5365152  |
| RPL5       | 1.0801904  |
| RPL5-PS2   | 1.4935043  |
| RPL6       | 1.4798105  |
| RPL7       | 1.7923429  |
| RPL7A      | 1.9133928  |
| RPL7L1     | 2.4715016  |
| RPL8       | 1.4138305  |
| RPL9       | 1.2895021  |
| RPLP0      | 1.7852023  |
| RPLP1      | 1.1699188  |
| RPLP2      | 1.8923082  |
| RPN1       | 3.351967   |
| RPN2       | 1.9023845  |

|            |            |
|------------|------------|
| RPP14      | 1.6122587  |
| RPP21      | 1.3712752  |
| RPP25L     | 1.4076092  |
| RPP30      | 1.5056932  |
| RPP38      | 2.1276739  |
| RPP40      | 3.5655458  |
| RPRD1B     | 0.70791554 |
| RPRD2      | 0.92761374 |
| RPS10      | 1.2719283  |
| RPS11      | 1.4690268  |
| RPS11-PS1  | 1.4334285  |
| RPS12      | 1.7012725  |
| RPS12L2    | 1.6185794  |
| RPS12-PS16 | 1.536216   |
| RPS13      | 1.7040832  |
| RPS14      | 1.5376263  |
| RPS15      | 0.7275398  |
| RPS15A     | 1.6501243  |
| RPS16      | 1.5092804  |
| RPS17      | 1.5823572  |
| RPS18      | 1.7455518  |
| RPS19      | 0.9768932  |
| RPS19BP1   | 2.1930916  |
| RPS2       | 2.175472   |
| RPS20      | 1.6561928  |
| RPS23      | 1.637419   |
| RPS24      | 1.1668942  |
| RPS25      | 1.4241521  |
| RPS26      | 1.4218042  |
| RPS27      | 1.5406742  |
| RPS27A     | 1.5959189  |
| RPS27L     | 3.3917563  |
| RPS28      | 1.6278234  |
| RPS29      | 1.1763668  |
| RPS3       | 1.5794532  |
| RPS3A1     | 1.4191716  |
| RPS4L      | 2.0020487  |
| RPS4X      | 1.3300893  |
| RPS5       | 1.6536856  |
| RPS6       | 1.2863352  |
| RPS6KA3    | 0.97905993 |
| RPS6KA4    | 1.2864478  |
| RPS6KB1    | 2.0456073  |
| RPS6KB2    | 1.1851163  |
| RPS6KC1    | 0.9241991  |

|         |            |
|---------|------------|
| RPS6KL1 | 1.0194943  |
| RPS7    | 2.1231492  |
| RPS8    | 1.5524876  |
| RPS9    | 1.27278    |
| RPSA    | 1.8927338  |
| RPTOR   | 1.6439393  |
| RPUSD3  | 2.7363641  |
| RPUSD4  | 0.39378333 |
| RQCD1   | 2.3973038  |
| RRAGA   | 3.0124876  |
| RRAGC   | 2.276883   |
| RRAS    | 0.9827521  |
| RRAS2   | 1.5440142  |
| RRBP1   | 3.1044352  |
| RREB1   | 1.4997313  |
| RRM1    | 0.3474853  |
| RRN3    | 1.7230985  |
| RRNAD1  | 0.50673103 |
| RRP1    | 1.4697154  |
| RRP15   | 2.3979275  |
| RRP1B   | 0.5235119  |
| RRP7A   | 1.6042078  |
| RRP8    | 1.8534474  |
| RRP9    | 2.13393    |
| RRS1    | 2.5354397  |
| RS1     | 0.4387548  |
| RS5-8S1 | 1.3843277  |
| RSAD1   | 0.7506585  |
| RSAD2   | 3.7793596  |
| RSL1    | 1.9426091  |
| RSL1D1  | 2.2706468  |
| RSL24D1 | 1.2978442  |
| RSPH3A  | 1.1212757  |
| RSPH3B  | 2.175114   |
| RSPH4A  | 1.0595024  |
| RSPO3   | 2.623648   |
| RSPRY1  | 1.980057   |
| RSRC2   | 1.8996418  |
| RSRP1   | 1.4851859  |
| RSU1    | 0.32803988 |
| RTCB    | 1.5629699  |
| RTEL1   | 1.3282211  |
| RTF1    | 1.1828144  |
| RTFDC1  | 1.7425864  |
| RTN3    | 1.2891705  |

|         |            |
|---------|------------|
| RTN4    | 0.98480916 |
| RTN4IP1 | 0.827626   |
| RTN4RL2 | 1.5554256  |
| RTP3    | 4.78409    |
| RTP4    | 2.0718172  |
| RUFY1   | 1.375994   |
| RUFY2   | 0.6242316  |
| RUFY3   | 1.7093842  |
| RUNDC1  | 1.5167634  |
| RUNDC3B | 1.7512865  |
| RUNX1   | 0.6101053  |
| RUSC1   | 0.8858073  |
| RUSC2   | 1.7406127  |
| RUVBL1  | 1.6613228  |
| RWDD2B  | 1.2224433  |
| RWDD4A  | 0.7688768  |
| RXRA    | 2.3270087  |
| RXRB    | 2.6801684  |
| RXRG    | 0.8702009  |
| RYBP    | 0.9010427  |
| RYK     | 0.8042743  |
| S100A10 | 0.7108786  |
| S100A11 | 0.8462446  |
| S100A8  | 1.6714017  |
| S100A9  | 1.8159254  |
| S100PBP | 0.7443912  |
| S1PR2   | 1.2160103  |
| SAA1    | 8.592663   |
| SAA2    | 10.639465  |
| SAA3    | 7.9789724  |
| SAA4    | 5.556882   |
| SAC3D1  | 1.1289642  |
| SACM1L  | 1.7654445  |
| SACS    | 1.4334276  |
| SAE1    | 0.7662575  |
| SAFB    | 1.5239794  |
| SAFB2   | 1.753032   |
| SALL1   | 6.3707523  |
| SAMD1   | 1.0183914  |
| SAMD10  | 1.4928992  |
| SAMD4B  | 2.248309   |
| SAMD8   | 2.2533638  |
| SAMD9L  | 1.805412   |
| SAMHD1  | 0.3036263  |
| SAMM50  | 2.5231774  |

|         |            |
|---------|------------|
| SAMSN1  | 1.598048   |
| SAP130  | 1.6380918  |
| SAP18   | 0.5096719  |
| SAP30   | 1.302948   |
| SAP30BP | 1.937793   |
| SAP30L  | 1.0845053  |
| SAR1A   | 1.8299124  |
| SAR1B   | 2.26817    |
| SARDH   | 3.4387047  |
| SARNP   | 1.4461544  |
| SARS    | 2.1547468  |
| SARS2   | 0.5070455  |
| SART3   | 1.5790966  |
| SASH1   | 1.9030464  |
| SAT1    | 1.4610007  |
| SAT2    | 0.73134685 |
| SATB1   | 0.25551176 |
| SAV1    | 1.1551974  |
| SBDS    | 1.7927353  |
| SBF1    | 2.0591018  |
| SBF2    | 0.85744834 |
| SBNO1   | 1.468435   |
| SBNO2   | 2.1563456  |
| SC5D    | 3.7884667  |
| SCAF1   | 0.87223697 |
| SCAF4   | 1.2243879  |
| SCAF8   | 1.3152153  |
| SCAMP1  | 2.0311615  |
| SCAMP2  | 0.89609265 |
| SCAMP3  | 1.9082644  |
| SCAMP4  | 2.2479231  |
| SCAMP5  | 3.4902434  |
| SCAND1  | 1.785002   |
| SCAP    | 2.6914694  |
| SCAPER  | 0.95085335 |
| SCARA5  | 0.89992356 |
| SCARB1  | 2.5341952  |
| SCARB2  | 1.5383785  |
| SCFD1   | 2.1751478  |
| SCFD2   | 2.1241376  |
| SCG5    | 1.600347   |
| SCIMP   | 1.1563385  |
| SCLY    | 3.4598272  |
| SCN1B   | 1.0303524  |
| SCN5A   | 0.5606313  |

|         |           |
|---------|-----------|
| SCN8A   | 2.3405836 |
| SCNM1   | 1.1604936 |
| SCO2    | 3.4256642 |
| SCOC    | 0.6410761 |
| SCP2    | 3.6061208 |
| SCPEP1  | 2.2716935 |
| SCRIB   | 1.7044156 |
| SCRN2   | 2.3533804 |
| SCRN3   | 2.0481303 |
| SCYL1   | 2.1261704 |
| SCYL2   | 2.894787  |
| SCYL3   | 1.8987396 |
| SDAD1   | 2.190386  |
| SDC1    | 2.5777724 |
| SDC2    | 1.8372056 |
| SDC4    | 4.793871  |
| SDCBP   | 1.0514553 |
| SDCCAG3 | 1.4087102 |
| SDCCAG8 | 0.8157823 |
| SDE2    | 1.7666414 |
| SDF2    | 1.7232492 |
| SDF2L1  | 3.9936721 |
| SDF4    | 1.6388142 |
| SDHA    | 2.52544   |
| SDHAF1  | 1.9932258 |
| SDHAF2  | 1.7317293 |
| SDHB    | 2.198928  |
| SDHC    | 2.2290537 |
| SDR39U1 | 1.5264771 |
| SDR42E1 | 5.015441  |
| SDS     | 6.087145  |
| SDSL    | 7.2748795 |
| SEBOX   | 2.5010142 |
| SEC1    | 2.750982  |
| SEC11A  | 2.017423  |
| SEC11C  | 1.4572732 |
| SEC13   | 2.3417323 |
| SEC14L2 | 3.1464703 |
| SEC14L4 | 1.9487016 |
| SEC16A  | 3.0600421 |
| SEC16B  | 4.395461  |
| SEC22B  | 2.0358937 |
| SEC23A  | 2.984462  |
| SEC23B  | 2.2238667 |
| SEC23IP | 2.0416343 |

|           |            |
|-----------|------------|
| SEC24A    | 3.2739766  |
| SEC24B    | 1.5101984  |
| SEC24C    | 1.8461754  |
| SEC24D    | 3.4788754  |
| SEC31A    | 2.3697202  |
| SEC31B    | 0.8572352  |
| SEC61A1   | 2.9561646  |
| SEC61B    | 2.2582881  |
| SEC61G    | 2.3421462  |
| SEC62     | 1.7260487  |
| SEC63     | 2.5153644  |
| SECISBP2  | 1.323703   |
| SECISBP2L | 0.6424606  |
| SEH1L     | 2.6288383  |
| SEL1L     | 1.4680789  |
| SEL1L3    | 1.2841549  |
| SELE      | 1.4767208  |
| SELENBP1  | 1.1684844  |
| SELK      | 2.6437705  |
| SELL      | 0.78937554 |
| SELO      | 2.8025262  |
| SELP      | 4.7967415  |
| SELT      | 1.8010538  |
| SEMA4A    | 2.3207972  |
| SEMA4B    | 1.0677824  |
| SEMA4C    | 3.3779821  |
| SEMA4G    | 3.697138   |
| SEMA6B    | 2.8097298  |
| SEMA6D    | 3.1023657  |
| SENP2     | 1.3302267  |
| SENP3     | 1.5684793  |
| SENP5     | 1.7125888  |
| SENP7     | 0.4535694  |
| SEPHS2    | 4.440526   |
| SEPN1     | 0.33833385 |
| SEPP1     | 2.9790626  |
| SEPSECS   | 1.9132509  |
| SEPW1     | 0.5122292  |
| SERBP1    | 2.2113569  |
| SERF1     | 1.0765598  |
| SERF2     | 1.3548481  |
| SERGEF    | 2.2519386  |
| SERHL     | 1.6074317  |
| SERINC1   | 2.586374   |
| SERINC3   | 1.5168622  |



|             |            |
|-------------|------------|
| SERINC5     | 1.8874338  |
| SERP1       | 3.3321874  |
| SERPINA10   | 10.216758  |
| SERPINA11   | 6.8673925  |
| SERPINA1A   | 8.537084   |
| SERPINA1C   | 8.161804   |
| SERPINA1D   | 9.447071   |
| SERPINA1E   | 8.505521   |
| SERPINA3C   | 6.4998426  |
| SERPINA3F   | 4.39835    |
| SERPINA3G   | 3.3070114  |
| SERPINA3H   | 3.491893   |
| SERPINA3I   | 5.3376207  |
| SERPINA3K   | 12.490768  |
| SERPINA3M   | 9.015566   |
| SERPINA3N   | 9.388249   |
| SERPINA4-PS | 1.7184267  |
| SERPINA6    | 5.7121725  |
| SERPINA7    | 6.7677774  |
| SERPINB2    | 2.5224411  |
| SERPINB7    | 0.6330843  |
| SERPINB8    | 3.3357236  |
| SERPINB9B   | 1.8249631  |
| SERPINC1    | 8.95936    |
| SERPIND1    | 7.4273167  |
| SERPINE1    | 7.1763334  |
| SERPINF1    | 4.8805523  |
| SERPINF2    | 8.38274    |
| SERPING1    | 4.0239553  |
| SERTAD1     | 1.1512668  |
| SERTAD2     | 0.85892415 |
| SERTAD3     | 0.8076234  |
| SESN2       | 0.8352711  |
| SET         | 1.7016532  |
| SETD1A      | 1.7206028  |
| SETD1B      | 1.1146567  |
| SETD2       | 1.3880441  |
| SETD4       | 0.9232385  |
| SETD5       | 1.0295074  |
| SETD6       | 2.381039   |
| SETD7       | 0.36456704 |
| SETD8       | 0.47354436 |
| SETDB1      | 1.4369619  |
| SETMAR      | 1.0490458  |
| SETX        | 2.1422226  |

|          |            |
|----------|------------|
| SEZ6L    | 1.7101479  |
| SF1      | 1.6818593  |
| SF3A1    | 1.7112257  |
| SF3A3    | 1.6483276  |
| SF3B2    | 1.7549894  |
| SF3B3    | 1.7255313  |
| SF3B4    | 1.3241761  |
| SF3B5    | 1.4752333  |
| SF3B6    | 1.6393678  |
| SF11     | 1.6531341  |
| SFMBT1   | 2.1521595  |
| SFPQ     | 1.663728   |
| SFR1     | 2.1189811  |
| SFSWAP   | 1.3865621  |
| SFT2D1   | 1.4604003  |
| SFT2D2   | 0.9597485  |
| SFT2D3   | 1.5593865  |
| SFXN1    | 3.411639   |
| SFXN2    | 0.617306   |
| SGK1     | 0.7308347  |
| SGK2     | 3.133221   |
| SGK3     | 0.9914911  |
| SGMS1    | 2.5544136  |
| SGPL1    | 2.1971757  |
| SGPP1    | 1.4150145  |
| SGSH     | 3.342448   |
| SGSM1    | 1.5473835  |
| SGSM3    | 1.6530468  |
| SGTA     | 1.7228987  |
| SH2B1    | 3.6318924  |
| SH2B2    | 3.0663602  |
| SH2D4B   | 1.2990923  |
| SH3BGRL  | 0.45531774 |
| SH3BGRL2 | 1.2190831  |
| SH3BP2   | 1.9038346  |
| SH3BP5   | 0.30017734 |
| SH3BP5L  | 0.2933004  |
| SH3D19   | 0.311754   |
| SH3GL1   | 1.3268864  |
| SH3GLB1  | 1.8547995  |
| SH3GLB2  | 0.39450908 |
| SH3PXD2B | 1.4450848  |
| SH3YL1   | 2.8990724  |
| SHARPIN  | 1.7410991  |
| SHB      | 1.4275591  |

|         |            |
|---------|------------|
| SHC1    | 2.0966942  |
| SHC4    | 0.53207946 |
| SHF     | 1.5526373  |
| SHFM1   | 1.4479654  |
| SHISA5  | 0.9032018  |
| SHKBP1  | 1.0605724  |
| SHMT1   | 2.58587    |
| SHMT2   | 2.458195   |
| SHOC2   | 1.8239987  |
| SHPK    | 2.7774985  |
| SHQ1    | 2.4293694  |
| SHROOM1 | 0.30330396 |
| SHROOM2 | 1.4395688  |
| SIAE    | 1.3055952  |
| SIAH1A  | 0.7753875  |
| SIAH1B  | 0.41657996 |
| SIAH2   | 0.80493283 |
| SIDT2   | 2.7326968  |
| SIGIRR  | 1.4262502  |
| SIGLECE | 1.3538759  |
| SIGLECH | 1.9327471  |
| SIGMAR1 | 2.1967347  |
| SIK1    | 1.7102387  |
| SIK2    | 1.5824964  |
| SIK3    | 1.8464582  |
| SIKE1   | 0.7787874  |
| SIL1    | 2.5697     |
| SIMC1   | 0.46529293 |
| SIN3A   | 1.8848369  |
| SIN3B   | 0.83692336 |
| SIPA1L1 | 0.7914989  |
| SIRPA   | 1.0712631  |
| SIRT1   | 1.2972262  |
| SIRT2   | 1.2407863  |
| SIRT3   | 3.3226564  |
| SIRT4   | 0.32824397 |
| SIRT5   | 1.3504312  |
| SIRT7   | 1.0462768  |
| SKAP2   | 1.0015032  |
| SKIL    | 1.1434381  |
| SKINT7  | 3.1883748  |
| SKIV2L  | 1.6591694  |
| SKIV2L2 | 1.1687138  |
| SKP1A   | 0.9630983  |
| SLA     | 1.6205881  |

|          |            |
|----------|------------|
| SLAIN2   | 1.4616053  |
| SLAMF1   | 4.515275   |
| SLAMF7   | 1.9867837  |
| SLAMF9   | 1.2511308  |
| SLBP     | 0.68222547 |
| SLC10A1  | 2.2013512  |
| SLC10A3  | 2.3099558  |
| SLC10A6  | 4.07749    |
| SLC11A1  | 3.6465442  |
| SLC11A2  | 1.8921854  |
| SLC12A1  | 0.5998523  |
| SLC12A4  | 2.0292509  |
| SLC12A5  | 0.7459967  |
| SLC12A7  | 1.4772274  |
| SLC12A9  | 0.73044634 |
| SLC13A3  | 5.236945   |
| SLC13A5  | 6.118149   |
| SLC15A3  | 2.4523275  |
| SLC15A4  | 1.7129819  |
| SLC16A10 | 3.6785495  |
| SLC16A14 | 0.53294325 |
| SLC16A2  | 0.8851893  |
| SLC16A3  | 2.8952672  |
| SLC16A5  | 5.0379457  |
| SLC16A6  | 4.1011534  |
| SLC17A1  | 10.86853   |
| SLC17A2  | 7.1264515  |
| SLC17A3  | 2.0131934  |
| SLC17A6  | 1.1791043  |
| SLC17A9  | 3.6460607  |
| SLC19A1  | 1.5443075  |
| SLC19A2  | 4.8070383  |
| SLC1A2   | 3.48921    |
| SLC1A4   | 3.4876316  |
| SLC20A1  | 3.5765069  |
| SLC20A2  | 2.2374218  |
| SLC22A18 | 2.6212685  |
| SLC22A21 | 1.816072   |
| SLC22A26 | 8.489222   |
| SLC22A27 | 4.084005   |
| SLC22A29 | 2.8621128  |
| SLC22A5  | 3.0249817  |
| SLC22A6  | 1.409019   |
| SLC22A7  | 1.7957747  |
| SLC23A1  | 3.1389372  |

|             |            |
|-------------|------------|
| SLC24A5     | 1.8790085  |
| SLC25A1     | 2.9749262  |
| SLC25A11    | 1.3492453  |
| SLC25A12    | 2.5595987  |
| SLC25A13    | 4.5517893  |
| SLC25A14    | 1.0788319  |
| SLC25A15    | 4.106596   |
| SLC25A16    | 2.2046187  |
| SLC25A17    | 0.91065097 |
| SLC25A19    | 0.921407   |
| SLC25A20    | 2.1643069  |
| SLC25A21    | 1.8325086  |
| SLC25A22    | 5.573862   |
| SLC25A25    | 4.835082   |
| SLC25A26    | 0.94141364 |
| SLC25A28    | 2.3619487  |
| SLC25A3     | 2.497411   |
| SLC25A30    | 2.0882318  |
| SLC25A32    | 2.6632898  |
| SLC25A33    | 4.176299   |
| SLC25A34    | 1.6483982  |
| SLC25A38    | 1.1707213  |
| SLC25A39    | 3.4754436  |
| SLC25A40    | 1.022234   |
| SLC25A42    | 3.6422813  |
| SLC25A44    | 1.9802263  |
| SLC25A45    | 0.49567747 |
| SLC25A46    | 1.5093901  |
| SLC25A47    | 8.856436   |
| SLC25A5     | 2.4817407  |
| SLC25A51    | 1.6886184  |
| SLC26A1     | 5.2035294  |
| SLC26A11    | 1.7333496  |
| SLC26A2     | 0.6776316  |
| SLC26A6     | 0.3567841  |
| SLC27A2     | 7.8536577  |
| SLC27A5     | 9.353384   |
| SLC29A1     | 1.283539   |
| SLC29A2     | 1.726541   |
| SLC2A1      | 3.5512712  |
| SLC2A2      | 5.8043823  |
| SLC2A4RG-PS | 0.7446563  |
| SLC2A5      | 3.7014506  |
| SLC2A6      | 2.934305   |
| SLC2A8      | 0.98343396 |

|          |            |
|----------|------------|
| SLC2A9   | 1.4722686  |
| SLC30A1  | 1.3511293  |
| SLC30A10 | 6.713048   |
| SLC30A4  | 1.6670253  |
| SLC30A5  | 2.4301336  |
| SLC30A6  | 2.2043242  |
| SLC30A7  | 1.6820295  |
| SLC30A9  | 1.9161842  |
| SLC31A1  | 1.530266   |
| SLC31A2  | 2.000408   |
| SLC33A1  | 2.829254   |
| SLC35A1  | 1.2875321  |
| SLC35A2  | 1.3963888  |
| SLC35A3  | 2.3101637  |
| SLC35A4  | 0.79612184 |
| SLC35B1  | 3.3192112  |
| SLC35B2  | 1.5940797  |
| SLC35B3  | 2.03556    |
| SLC35B4  | 0.76935554 |
| SLC35C1  | 1.8353007  |
| SLC35C2  | 1.9935215  |
| SLC35D1  | 2.8071487  |
| SLC35D2  | 3.3119423  |
| SLC35E1  | 1.9439342  |
| SLC35E2  | 0.6617348  |
| SLC35E3  | 0.7994175  |
| SLC35F5  | 3.3622677  |
| SLC35F6  | 1.6350396  |
| SLC35G1  | 2.7059596  |
| SLC37A1  | 1.9671695  |
| SLC37A3  | 2.6232402  |
| SLC37A4  | 1.9675958  |
| SLC38A1  | 0.43509555 |
| SLC38A2  | 4.200495   |
| SLC38A3  | 8.11275    |
| SLC38A4  | 6.063301   |
| SLC38A6  | 0.65825653 |
| SLC38A7  | 0.3999908  |
| SLC39A1  | 2.838487   |
| SLC39A11 | 1.6011536  |
| SLC39A13 | 0.638489   |
| SLC39A14 | 6.6810617  |
| SLC39A3  | 0.26777673 |
| SLC39A4  | 2.9137518  |
| SLC39A6  | 0.7296684  |

|          |            |
|----------|------------|
| SLC39A7  | 2.3520958  |
| SLC39A9  | 0.5596585  |
| SLC3A1   | 6.7823343  |
| SLC3A2   | 2.430466   |
| SLC40A1  | 1.730252   |
| SLC41A1  | 1.6074431  |
| SLC41A2  | 6.348486   |
| SLC41A3  | 1.9703581  |
| SLC43A1  | 4.3942175  |
| SLC43A2  | 0.4861653  |
| SLC45A4  | 0.89765525 |
| SLC46A1  | 1.7040775  |
| SLC48A1  | 0.7060821  |
| SLC4A1AP | 0.4939673  |
| SLC4A2   | 1.3850572  |
| SLC4A4   | 6.2886333  |
| SLC4A9   | 2.3616946  |
| SLC51B   | 3.990708   |
| SLC5A6   | 2.2491605  |
| SLC6A12  | 7.428343   |
| SLC6A13  | 5.6419983  |
| SLC6A19  | 1.6703517  |
| SLC6A6   | 0.69628644 |
| SLC6A8   | 1.6208065  |
| SLC6A9   | 1.4429004  |
| SLC7A1   | 1.8662035  |
| SLC7A11  | 0.41645312 |
| SLC7A2   | 4.134715   |
| SLC7A3   | 1.5772281  |
| SLC7A5   | 1.0119014  |
| SLC7A6OS | 2.6127918  |
| SLC7A7   | 1.7875383  |
| SLC7A8   | 1.1828375  |
| SLC8B1   | 1.9444602  |
| SLC9A1   | 0.44851422 |
| SLC9A3R1 | 3.2742693  |
| SLC9A6   | 1.6837089  |
| SLC9A8   | 2.3774903  |
| SLCO1A1  | 2.4296699  |
| SLCO1A4  | 2.739391   |
| SLCO1B2  | 9.475862   |
| SLCO2B1  | 1.3715391  |
| SLFN2    | 1.6327655  |
| SLFN3    | 0.834038   |
| SLFN4    | 2.3606436  |

|            |            |
|------------|------------|
| SLFN5      | 2.1196878  |
| SLFN8      | 0.5559685  |
| SLK        | 1.2152579  |
| SLMAP      | 1.2435477  |
| SLMO2      | 2.0715635  |
| SLPI       | 5.052969   |
| SLTM       | 2.180467   |
| SLX4       | 1.6421874  |
| SMAD1      | 1.400079   |
| SMAD2      | 0.9051964  |
| SMAD4      | 1.3614881  |
| SMAD5      | 1.125973   |
| SMAGP      | 1.2293141  |
| SMAP1      | 1.2933357  |
| SMAP2      | 1.3227351  |
| SMARCA4    | 1.1636894  |
| SMARCA5    | 1.548157   |
| SMARCA5-PS | 1.312432   |
| SMARCAD1   | 1.5820396  |
| SMARCB1    | 0.69554114 |
| SMARCC1    | 0.5735376  |
| SMARCC2    | 0.7876494  |
| SMARCE1    | 0.28429055 |
| SMC1A      | 1.0898106  |
| SMC3       | 1.1494496  |
| SMC4       | 0.43676257 |
| SMC5       | 2.4124534  |
| SMC6       | 0.84603906 |
| SMCHD1     | 0.8916266  |
| SMCO4      | 0.76565623 |
| SMCR8      | 2.7258666  |
| SMDT1      | 1.5707705  |
| SMEK1      | 1.1359279  |
| SMEK2      | 1.4400122  |
| SMG1       | 2.4922745  |
| SMG5       | 2.3488529  |
| SMG6       | 1.0651162  |
| SMG7       | 1.5189707  |
| SMG9       | 1.0759461  |
| SMIM11     | 0.7471769  |
| SMIM12     | 1.2844994  |
| SMIM13     | 1.8959372  |
| SMIM14     | 1.6968262  |
| SMIM19     | 1.7194393  |
| SMIM20     | 2.5665066  |



|          |            |
|----------|------------|
| SMIM3    | 0.54729486 |
| SMIM7    | 1.831054   |
| SMIM8    | 1.825525   |
| SMLR1    | 7.37656    |
| SMN1     | 1.2312644  |
| SMNDC1   | 2.2379272  |
| SMOC1    | 7.3053904  |
| SMOC2    | 0.34099317 |
| SMOX     | 2.2144945  |
| SMPD1    | 2.2061422  |
| SMPD3    | 1.8987956  |
| SMPD4    | 1.1326377  |
| SMPDL3A  | 0.7193868  |
| SMPDL3B  | 0.7567377  |
| SMU1     | 1.544627   |
| SMURF2   | 0.2835791  |
| SMYD1    | 0.90912294 |
| SMYD2    | 1.2671449  |
| SNAP23   | 1.3465021  |
| SNAP25   | 0.38605714 |
| SNAP29   | 1.7033751  |
| SNAP47   | 1.2754796  |
| SNAPC1   | 2.1199815  |
| SNAPC2   | 1.3791959  |
| SNAPC4   | 1.7610471  |
| SNAPIN   | 0.49011588 |
| SND1     | 1.8178518  |
| SNF8     | 1.6210787  |
| SNHG1    | 2.742852   |
| SNHG12   | 3.230748   |
| SNHG3    | 2.41669    |
| SNHG5    | 0.96442604 |
| SNHG6    | 4.341239   |
| SNHG7    | 2.1651742  |
| SNIP1    | 1.1116712  |
| SNORA74A | 1.4022174  |
| SNRNP200 | 1.3831456  |
| SNRNP27  | 1.436939   |
| SNRNP48  | 2.3032243  |
| SNRNP70  | 1.6241043  |
| SNRPA    | 1.7027233  |
| SNRPA1   | 1.7637489  |
| SNRPB    | 0.71700406 |
| SNRPB2   | 0.9293554  |
| SNRPC    | 1.7571871  |

|        |            |
|--------|------------|
| SNRPD1 | 1.3900645  |
| SNRPD2 | 1.4278629  |
| SNRPD3 | 1.3521597  |
| SNRPE  | 1.0065477  |
| SNRPG  | 0.91719556 |
| SNRPN  | 0.9827161  |
| SNTB2  | 2.7500536  |
| SNTG1  | 0.3452494  |
| SNTG2  | 2.2229838  |
| SNUPN  | 1.2687938  |
| SNW1   | 1.5282924  |
| SNX1   | 1.3882864  |
| SNX10  | 4.0256386  |
| SNX11  | 0.9910338  |
| SNX12  | 1.310889   |
| SNX13  | 2.0396202  |
| SNX14  | 1.3269413  |
| SNX15  | 2.3220131  |
| SNX16  | 2.2388752  |
| SNX17  | 0.88286996 |
| SNX18  | 2.1712983  |
| SNX19  | 1.9090788  |
| SNX2   | 1.0365136  |
| SNX24  | 1.4403789  |
| SNX27  | 0.6786916  |
| SNX3   | 1.6724088  |
| SNX30  | 0.85166454 |
| SNX33  | 1.5743926  |
| SNX4   | 1.084296   |
| SNX5   | 1.4160469  |
| SNX6   | 0.7412889  |
| SNX7   | 2.3948448  |
| SNX8   | 2.4053476  |
| SNX9   | 1.2763474  |
| SOAT2  | 6.162285   |
| SOCS1  | 4.221631   |
| SOCS2  | 0.9782679  |
| SOCS3  | 4.5939703  |
| SOCS4  | 1.3485217  |
| SOCS7  | 1.4702575  |
| SOD1   | 1.9786191  |
| SOD2   | 5.5737934  |
| SON    | 1.6007345  |
| SORBS1 | 1.2909806  |
| SORBS2 | 2.3776646  |

|          |            |
|----------|------------|
| SORBS3   | 0.71492124 |
| SORCS3   | 1.8882155  |
| SORD     | 1.0204837  |
| SOS2     | 0.80905795 |
| SOWAHB   | 1.9583719  |
| SOWAHC   | 2.7417986  |
| SOWAHD   | 1.6009552  |
| SOX9     | 5.796933   |
| SP1      | 1.4174078  |
| SP110    | 3.1357486  |
| SP140    | 1.2638848  |
| SPAG7    | 3.334159   |
| SPAG9    | 1.1511586  |
| SPAST    | 2.3020709  |
| SPATA1   | 0.45544124 |
| SPATA13  | 0.9084084  |
| SPATA2   | 0.62375236 |
| SPATA22  | 4.650294   |
| SPATA5   | 2.3543599  |
| SPATA5L1 | 0.9488051  |
| SPATA7   | 0.3089404  |
| SPATC1L  | 0.739347   |
| SPCS1    | 1.9469063  |
| SPCS2    | 3.8038118  |
| SPCS3    | 2.5605633  |
| SPDEF    | 0.89039993 |
| SPEN     | 1.1418002  |
| SPG11    | 1.3021066  |
| SPG20    | 1.6536691  |
| SPG21    | 1.7865522  |
| SPG7     | 1.5410106  |
| SPHK1    | 1.2945259  |
| SPHK2    | 0.8719809  |
| SPI1     | 0.2917695  |
| SPIC     | 3.725939   |
| SPIDR    | 2.3335412  |
| SPIN1    | 1.9603298  |
| SPINK3   | 4.629876   |
| SPNS1    | 1.9953048  |
| SPOP     | 0.40539908 |
| SPP1     | 1.431256   |
| SPP2     | 8.440487   |
| SPPL2A   | 3.5885866  |
| SPPL2B   | 1.3178685  |
| SPR      | 1.2277715  |

|          |            |
|----------|------------|
| SPRED1   | 1.3490546  |
| SPRED2   | 1.3822823  |
| SPRR1A   | 0.31284785 |
| SPRR2A2  | 0.9005058  |
| SPRR2D   | 2.0716653  |
| SPRYD4   | 3.966575   |
| SPRYD7   | 2.3154142  |
| SPSB2    | 2.0004523  |
| SPSB3    | 1.5406649  |
| SPTAN1   | 0.40512633 |
| SPTBN2   | 2.6637526  |
| SPTLC1   | 1.0372188  |
| SPTLC2   | 0.91585755 |
| SPTSSA   | 0.7214143  |
| SPTY2D1  | 2.1039479  |
| SQLE     | 4.2430677  |
| SQRDL    | 2.9852874  |
| SQSTM1   | 2.781216   |
| SRA1     | 3.126055   |
| SRD5A1   | 0.63054776 |
| SRD5A3   | 0.6077335  |
| SREBF2   | 1.4728484  |
| SREK1    | 3.6952798  |
| SREK1IP1 | 1.163152   |
| SRF      | 1.0070636  |
| SRFBP1   | 2.6238663  |
| SRGN     | 1.4704931  |
| SRI      | 0.9935491  |
| SRM      | 2.7131178  |
| SRP14    | 0.95607257 |
| SRP19    | 2.3830316  |
| SRP54A   | 1.416487   |
| SRP54C   | 3.0583751  |
| SRP68    | 2.4122422  |
| SRP72    | 2.653602   |
| SRP9     | 2.3482454  |
| SRPK1    | 2.7862308  |
| SRPR     | 3.6057904  |
| SRPRB    | 0.7631259  |
| SRR      | 2.2261302  |
| SRRD     | 1.6609678  |
| SRRM1    | 0.81443954 |
| SRRM2    | 0.34275603 |
| SRRM4    | 5.142954   |
| SRSF1    | 1.1713579  |

|            |            |
|------------|------------|
| SRSF10     | 0.98466444 |
| SRSF11     | 0.9175761  |
| SRSF2      | 0.49978328 |
| SRSF3      | 1.0008032  |
| SRSF4      | 1.0647814  |
| SRSF5      | 2.520491   |
| SRSF6      | 2.0099752  |
| SRSF7      | 1.7716148  |
| SRSF9      | 1.2084224  |
| SRXN1      | 4.833973   |
| SS18       | 1.0195706  |
| SS18L1     | 1.5586958  |
| SSB        | 1.5850155  |
| SSBP1      | 2.0433643  |
| SSBP4      | 0.47661614 |
| SSH1       | 1.9026842  |
| SSH3       | 1.9394891  |
| SSNA1      | 0.7266333  |
| SSR1       | 2.0306804  |
| SSR2       | 2.2215612  |
| SSR3       | 2.6213639  |
| SSR4       | 2.891608   |
| SSRP1      | 1.0620048  |
| SSSCA1     | 1.9803789  |
| SSU72      | 2.4295042  |
| SSX2IP     | 1.9367058  |
| ST13       | 2.6621516  |
| ST3GAL1    | 2.9770257  |
| ST3GAL3    | 2.8644164  |
| ST3GAL4    | 2.6319478  |
| ST3GAL5    | 4.477087   |
| ST5        | 1.1578557  |
| ST6GAL1    | 3.2325227  |
| ST6GALNAC4 | 1.321914   |
| ST6GALNAC6 | 1.1469638  |
| ST7        | 2.4494426  |
| ST7L       | 1.8331373  |
| ST8SIA3    | 1.5423112  |
| STAB1      | 2.119325   |
| STAB2      | 5.8527384  |
| STAG1      | 1.7869413  |
| STAG2      | 0.71262383 |
| STAM       | 0.8353207  |
| STAM2      | 1.2816365  |
| STAMBP     | 1.0479753  |

|          |            |
|----------|------------|
| STAMBPL1 | 0.71078706 |
| STAP2    | 4.6295633  |
| STARD10  | 2.493159   |
| STARD3   | 0.9582441  |
| STARD4   | 1.4455826  |
| STARD5   | 2.6126096  |
| STARD7   | 2.0776913  |
| STAT2    | 1.9275601  |
| STAT3    | 3.1285164  |
| STAT5A   | 1.3024032  |
| STAT5B   | 0.9447367  |
| STAT6    | 1.3157108  |
| STAU1    | 1.713018   |
| STAU2    | 0.7706268  |
| STBD1    | 2.3734343  |
| STEAP1   | 5.0412426  |
| STEAP2   | 3.8173225  |
| STEAP4   | 8.876439   |
| STFA1    | 0.5820453  |
| STFA2L1  | 0.6865928  |
| STFA3    | 0.8386259  |
| STIM1    | 0.58117414 |
| STIP1    | 1.9087327  |
| STK11    | 1.4644239  |
| STK11IP  | 1.6324778  |
| STK16    | 1.4751618  |
| STK17B   | 0.97616935 |
| STK19    | 2.2932775  |
| STK24    | 0.68623424 |
| STK25    | 1.6981142  |
| STK3     | 0.96688175 |
| STK35    | 1.5749063  |
| STK38    | 1.3149426  |
| STK38L   | 1.5410821  |
| STK40    | 2.3858984  |
| STOM     | 1.2692273  |
| STOML2   | 1.8348434  |
| STRA13   | 0.54031444 |
| STRADA   | 1.4409602  |
| STRADB   | 0.7162924  |
| STRAP    | 1.5576842  |
| STRBP    | 2.5217311  |
| STRIP1   | 1.2904313  |
| STRN3    | 0.94203496 |
| STRN4    | 1.6488554  |

|         |            |
|---------|------------|
| STS     | 3.2543747  |
| STT3A   | 2.5981004  |
| STT3B   | 1.5797746  |
| STUB1   | 1.811372   |
| STX12   | 1.4582775  |
| STX16   | 1.5735993  |
| STX17   | 0.76307917 |
| STX18   | 2.418197   |
| STX2    | 0.6636715  |
| STX4A   | 1.757716   |
| STX5A   | 2.0042832  |
| STX7    | 0.5771172  |
| STX8    | 1.4494565  |
| STXBP2  | 1.4252698  |
| STXBP3A | 2.5130904  |
| STXBP3B | 2.2801936  |
| SUB1    | 1.0435436  |
| SUCLA2  | 2.4359767  |
| SUCLG1  | 2.3212378  |
| SUCLG2  | 4.0168333  |
| SUCNR1  | 1.7333832  |
| SUCO    | 3.5207765  |
| SUDS3   | 0.85557103 |
| SUGP1   | 2.1102273  |
| SUGT1   | 1.7642243  |
| SULT1A1 | 4.3864393  |
| SULT1B1 | 5.894328   |
| SULT1C2 | 1.981482   |
| SULT1D1 | 3.250322   |
| SULT1E1 | 11.381954  |
| SULT2A1 | 5.8045425  |
| SULT2A2 | 5.9207125  |
| SULT2A4 | 4.769102   |
| SULT2A6 | 4.7991056  |
| SULT3A1 | 3.8738682  |
| SULT4A1 | 0.38064122 |
| SUMF1   | 1.4593742  |
| SUMF2   | 0.8076041  |
| SUMO1   | 0.70468163 |
| SUMO2   | 0.6100271  |
| SUMO3   | 1.0163205  |
| SUN2    | 1.8229821  |
| SUOX    | 2.4297674  |
| SUPT16  | 2.9330058  |
| SUPT5   | 1.528897   |

|          |            |
|----------|------------|
| SUPT6    | 1.1686313  |
| SUPT7L   | 3.1661673  |
| SUPV3L1  | 3.1026747  |
| SURF1    | 0.752229   |
| SURF2    | 1.8554957  |
| SURF4    | 3.2424667  |
| SURF6    | 1.7429283  |
| SUSD2    | 1.5214684  |
| SUV39H2  | 3.4304402  |
| SUV420H1 | 1.2376559  |
| SUV420H2 | 0.87480664 |
| SUZ12    | 2.0349467  |
| SVA      | 1.2640874  |
| SWI5     | 2.6657436  |
| SWT1     | 1.08236    |
| SYAP1    | 1.367882   |
| SYBU     | 1.9935951  |
| SYCE2    | 1.467447   |
| SYCP1    | 2.4037123  |
| SYF2     | 1.2103136  |
| SYK      | 1.3185232  |
| SYMPK    | 2.1616714  |
| SYNC     | 1.0058281  |
| SYNCRIP  | 1.8754609  |
| SYNGR2   | 0.98666215 |
| SYNJ1    | 1.0998604  |
| SYNJ2    | 1.2348793  |
| SYNJ2BP  | 1.8576972  |
| SYNPO    | 0.96985483 |
| SYNPO2L  | 3.4614851  |
| SYPL     | 0.9700725  |
| SYS1     | 2.0647242  |
| SYT1     | 3.0129232  |
| SYT12    | 1.7364595  |
| SYVN1    | 3.8489826  |
| SZRD1    | 1.9422691  |
| SZT2     | 0.6582644  |
| TAB1     | 0.37772393 |
| TAB2     | 1.8461864  |
| TAB3     | 1.9684865  |
| TAC1     | 2.4822946  |
| TACC1    | 0.53731704 |
| TACC2    | 1.4576352  |
| TACC3    | 0.49944806 |
| TACO1    | 2.4981422  |



|          |            |
|----------|------------|
| TACR2    | 0.7583735  |
| TADA1    | 1.5701301  |
| TADA2A   | 1.3764293  |
| TADA2B   | 1.1575675  |
| TADA3    | 0.29414344 |
| TAF1     | 0.45852065 |
| TAF10    | 1.852555   |
| TAF11    | 1.3265088  |
| TAF12    | 1.4668171  |
| TAF13    | 0.5689361  |
| TAF15    | 0.7897074  |
| TAF1B    | 1.4764462  |
| TAF1C    | 1.1640301  |
| TAF1D    | 2.0137804  |
| TAF2     | 1.3428681  |
| TAF3     | 1.1264312  |
| TAF4A    | 1.3523209  |
| TAF5     | 2.438471   |
| TAF5L    | 1.790786   |
| TAF6     | 1.1904209  |
| TAF6L    | 1.4767268  |
| TAF7L    | 1.3969357  |
| TAF8     | 0.70408225 |
| TAF9     | 3.0803602  |
| TALDO1   | 1.042763   |
| TANC1    | 0.7575884  |
| TANGO2   | 1.9980028  |
| TANK     | 1.7973905  |
| TAOK3    | 0.34276533 |
| TAP1     | 2.567372   |
| TAP2     | 2.8332198  |
| TAPBP    | 2.2525814  |
| TAPBPL   | 2.6406224  |
| TAPT1    | 2.1760132  |
| TARBP2   | 1.9853394  |
| TARDBP   | 1.4418514  |
| TARS     | 3.3148406  |
| TARS2    | 0.3476379  |
| TARSL2   | 1.1002359  |
| TAS1R3   | 1.1057773  |
| TAS2R109 | 0.8648956  |
| TASP1    | 1.2638354  |
| TAT      | 9.93847    |
| TATDN1   | 1.91224    |
| TATDN2   | 0.6140785  |

|          |            |
|----------|------------|
| TATDN3   | 0.9323404  |
| TAX1BP1  | 2.2119462  |
| TAX1BP3  | 0.72936845 |
| TAZ      | 1.2960508  |
| TBC1D1   | 0.54859805 |
| TBC1D10A | 0.34724355 |
| TBC1D10B | 1.4247873  |
| TBC1D13  | 1.1247818  |
| TBC1D14  | 1.0922768  |
| TBC1D15  | 3.40461    |
| TBC1D16  | 1.2733138  |
| TBC1D17  | 2.2629378  |
| TBC1D2   | 0.3991754  |
| TBC1D20  | 1.452564   |
| TBC1D22A | 1.5578678  |
| TBC1D23  | 1.3718102  |
| TBC1D24  | 5.5905514  |
| TBC1D25  | 0.88950515 |
| TBC1D2B  | 0.54899955 |
| TBC1D5   | 1.1939485  |
| TBC1D7   | 1.0298941  |
| TBC1D8   | 2.5273886  |
| TBC1D8B  | 2.315234   |
| TBC1D9   | 1.2710941  |
| TBC1D9B  | 1.0419476  |
| TBCA     | 1.1324594  |
| TBCB     | 1.633456   |
| TBCC     | 1.7022302  |
| TBCCD1   | 2.2852106  |
| TBCD     | 1.4529727  |
| TBCEL    | 1.1784327  |
| TBK1     | 3.2366788  |
| TBL1X    | 0.52764726 |
| TBL1XR1  | 1.2657287  |
| TBL2     | 0.68519235 |
| TBP      | 0.5442481  |
| TBPL1    | 1.6294072  |
| TBRG1    | 2.9653165  |
| TBRG4    | 2.1178467  |
| TCAIM    | 2.2583168  |
| TCEA1    | 2.1033213  |
| TCEAL5   | 4.350527   |
| TCEAL8   | 1.630624   |
| TCEB1    | 2.2214506  |
| TCEB2    | 1.8566134  |

|          |            |
|----------|------------|
| TCEB3    | 1.4373977  |
| TCERG1   | 1.4395947  |
| TCF12    | 0.7622931  |
| TCF20    | 0.8236015  |
| TCF24    | 0.9315953  |
| TCF25    | 2.1590092  |
| TCHP     | 0.72064924 |
| TCIRG1   | 2.6619132  |
| TCN2     | 1.3256018  |
| TCOF1    | 0.5910022  |
| TCP1     | 2.131345   |
| TCP11L2  | 1.8422506  |
| TCTA     | 0.49385977 |
| TCTEX1D2 | 1.2957804  |
| TDG      | 2.2107785  |
| TDO2     | 7.3877754  |
| TDP2     | 1.8063776  |
| TDPOZ1   | 2.3099375  |
| TDRD7    | 1.7684     |
| TDRP     | 1.0107305  |
| TEAD1    | 1.5187976  |
| TEAD3    | 1.6886306  |
| TEC      | 1.2323437  |
| TECPR2   | 0.80724573 |
| TECR     | 1.543411   |
| TECTB    | 2.5933042  |
| TEF      | 0.46120095 |
| TEFM     | 1.4439728  |
| TELO2    | 0.44683528 |
| TEP1     | 1.0151422  |
| TERF1    | 1.6202028  |
| TES      | 0.4868214  |
| TESK1    | 1.1865184  |
| TET2     | 0.86915636 |
| TEX10    | 1.4536235  |
| TEX12    | 1.4452214  |
| TEX2     | 3.5844915  |
| TEX261   | 1.0197799  |
| TEX264   | 2.023782   |
| TEX30    | 2.4303     |
| TFAM     | 2.1288035  |
| TFB1M    | 3.231694   |
| TFB2M    | 2.3997467  |
| TFDP1    | 1.7055838  |
| TFE3     | 3.0967033  |

|          |            |
|----------|------------|
| TFEC     | 1.6484628  |
| TFF3     | 3.7842467  |
| TFG      | 2.5490177  |
| TFIP11   | 1.3603251  |
| TFPI     | 0.8218782  |
| TFPI2    | 2.1250284  |
| TFPT     | 1.4165876  |
| TFR2     | 7.805114   |
| TFRC     | 0.89610934 |
| TGDS     | 1.4568052  |
| TGFA     | 2.209845   |
| TGFBR1   | 0.67451715 |
| TGFBRAP1 | 1.131717   |
| TGIF1    | 3.7826178  |
| TGM1     | 2.9151413  |
| TGM2     | 3.7613468  |
| TGM3     | 1.0950682  |
| TGOLN1   | 2.2210553  |
| TGOLN2   | 0.48448634 |
| TGS1     | 1.2568591  |
| TGTP1    | 3.4843514  |
| TGTP2    | 2.607189   |
| THA1     | 3.444709   |
| THAP2    | 1.3067663  |
| THAP4    | 1.5746748  |
| THAP6    | 1.0641017  |
| THAP7    | 1.5773704  |
| THBS1    | 1.1552093  |
| THEM4    | 3.2592862  |
| THEM7    | 1.7336125  |
| THEMIS2  | 0.7842176  |
| THG1L    | 1.3887599  |
| THNSL2   | 0.8323815  |
| THOC1    | 1.7515006  |
| THOC2    | 0.98981524 |
| THOC3    | 1.9064248  |
| THOC5    | 2.130388   |
| THOC6    | 1.2174609  |
| THOC7    | 1.6514885  |
| THOP1    | 1.4298568  |
| THPO     | 3.6741102  |
| THRAP3   | 1.107794   |
| THRB     | 1.3093312  |
| THRSP    | 3.6543515  |
| THSD1    | 0.7141936  |

|         |            |
|---------|------------|
| THTPA   | 1.1130202  |
| THUMPD1 | 2.017896   |
| THUMPD3 | 2.0234807  |
| THYN1   | 2.8821318  |
| TIAL1   | 1.683336   |
| TICAM1  | 1.1511948  |
| TIFA    | 7.7142076  |
| TIGD2   | 2.679579   |
| TIGD4   | 1.8410685  |
| TIMD2   | 2.5060189  |
| TIMD4   | 1.63939    |
| TIMM10  | 3.457999   |
| TIMM10B | 2.679114   |
| TIMM13  | 1.9580262  |
| TIMM17A | 1.8802574  |
| TIMM17B | 3.5171897  |
| TIMM21  | 2.047848   |
| TIMM22  | 0.70990634 |
| TIMM23  | 3.0307024  |
| TIMM44  | 2.2174714  |
| TIMM50  | 1.6465476  |
| TIMM8A1 | 4.032034   |
| TIMM8B  | 2.052789   |
| TIMM9   | 2.492287   |
| TIMMDC1 | 2.1518605  |
| TIMP1   | 4.9962063  |
| TINAGL1 | 2.5709646  |
| TINF2   | 2.3133037  |
| TIPARP  | 3.5548508  |
| TIPIN   | 1.3417928  |
| TIPRL   | 2.1166542  |
| TIRAP   | 2.5466087  |
| TJAP1   | 1.6216786  |
| TJP3    | 1.8645093  |
| TK2     | 1.4360607  |
| TKT     | 0.7923229  |
| TLCD1   | 3.5670226  |
| TLDC1   | 1.0185714  |
| TLDC2   | 0.98589444 |
| TLE1    | 1.600836   |
| TLK1    | 1.3673193  |
| TLK2    | 2.057031   |
| TLR1    | 1.7871199  |
| TLR13   | 0.67610765 |
| TLR2    | 3.1554701  |

|          |            |
|----------|------------|
| TLR3     | 1.4207106  |
| TLR6     | 2.1066854  |
| TLR7     | 0.83662295 |
| TLR9     | 2.0769737  |
| TM2D1    | 1.5189292  |
| TM2D2    | 0.64969087 |
| TM2D3    | 1.7988298  |
| TM4SF4   | 7.4966326  |
| TM4SF5   | 1.5939443  |
| TM6SF1   | 0.31087327 |
| TM6SF2   | 3.6330454  |
| TM7SF2   | 4.9272795  |
| TM7SF3   | 2.8932536  |
| TM9SF1   | 2.0776646  |
| TM9SF2   | 2.4846122  |
| TM9SF3   | 1.5713522  |
| TM9SF4   | 3.7697165  |
| TMA16    | 2.623661   |
| TMA7     | 1.2836621  |
| TMBIM1   | 0.6133616  |
| TMBIM4   | 3.0467565  |
| TMBIM6   | 1.4357407  |
| TMC7     | 2.4156053  |
| TMCC1    | 0.3996389  |
| TMCO1    | 1.3586271  |
| TMCO4    | 2.0281527  |
| TMCO5    | 1.6514366  |
| TMCO6    | 3.1056087  |
| TMED1    | 1.0240409  |
| TMED10   | 1.7766812  |
| TMED2    | 2.5006435  |
| TMED3    | 1.6433694  |
| TMED4    | 2.5829923  |
| TMED5    | 3.0168145  |
| TMED7    | 2.2747035  |
| TMED8    | 0.67266965 |
| TMED9    | 1.838125   |
| TMEM102  | 1.1110542  |
| TMEM106B | 2.0446327  |
| TMEM106C | 1.5615766  |
| TMEM11   | 2.049815   |
| TMEM110  | 0.43873787 |
| TMEM115  | 1.506707   |
| TMEM120A | 4.3275185  |
| TMEM123  | 0.8902457  |

|            |            |
|------------|------------|
| TMEM125    | 1.9191973  |
| TMEM126A   | 2.6652138  |
| TMEM126B   | 2.2384708  |
| TMEM127    | 1.2133243  |
| TMEM128    | 1.8286016  |
| TMEM129    | 2.1366427  |
| TMEM131    | 1.1676862  |
| TMEM132E   | 7.8940964  |
| TMEM134    | 1.0943167  |
| TMEM135    | 1.4340289  |
| TMEM138    | 0.7308688  |
| TMEM140    | 2.6020162  |
| TMEM141    | 1.1842716  |
| TMEM144    | 1.3922033  |
| TMEM147    | 1.5016987  |
| TMEM14C    | 1.0466583  |
| TMEM150A   | 2.709974   |
| TMEM151B   | 0.37642193 |
| TMEM158    | 2.6544516  |
| TMEM160    | 0.9073961  |
| TMEM161A   | 1.2766597  |
| TMEM161B   | 0.9113853  |
| TMEM165    | 0.3197019  |
| TMEM167    | 2.731682   |
| TMEM167B   | 0.9221661  |
| TMEM170    | 2.0193424  |
| TMEM170B   | 1.2729504  |
| TMEM171    | 1.2584932  |
| TMEM176A   | 2.0603802  |
| TMEM176B   | 2.1886237  |
| TMEM177    | 0.41604137 |
| TMEM179B   | 1.7562625  |
| TMEM18     | 1.0767095  |
| TMEM181A   | 1.0287092  |
| TMEM181B-f | 0.9034467  |
| TMEM183A   | 2.484738   |
| TMEM184B   | 0.9920995  |
| TMEM184C   | 1.9934947  |
| TMEM185B   | 2.266092   |
| TMEM186    | 2.1317973  |
| TMEM189    | 0.97516227 |
| TMEM19     | 2.571655   |
| TMEM192    | 2.3436491  |
| TMEM194    | 0.4219134  |
| TMEM199    | 2.3814278  |

|          |            |
|----------|------------|
| TMEM2    | 2.3741748  |
| TMEM202  | 1.015645   |
| TMEM203  | 2.7354372  |
| TMEM205  | 2.261258   |
| TMEM206  | 0.7227919  |
| TMEM208  | 2.0846937  |
| TMEM214  | 2.9366586  |
| TMEM215  | 0.72368693 |
| TMEM219  | 1.037164   |
| TMEM220  | 0.7252004  |
| TMEM222  | 1.8800972  |
| TMEM230  | 1.5017278  |
| TMEM234  | 0.8627217  |
| TMEM238  | 0.9768393  |
| TMEM239  | 3.403509   |
| TMEM242  | 0.8228371  |
| TMEM243  | 0.7885301  |
| TMEM248  | 2.6343896  |
| TMEM25   | 1.0536559  |
| TMEM251  | 3.0688274  |
| TMEM252  | 2.2794309  |
| TMEM254A | 1.7213962  |
| TMEM254C | 0.6817148  |
| TMEM255B | 0.7169647  |
| TMEM256  | 2.2063854  |
| TMEM258  | 1.8947136  |
| TMEM259  | 1.9483297  |
| TMEM261  | 1.6910717  |
| TMEM263  | 1.9138143  |
| TMEM30A  | 1.2773011  |
| TMEM30B  | 1.2072184  |
| TMEM33   | 1.6780298  |
| TMEM37   | 0.6878698  |
| TMEM38B  | 1.9655364  |
| TMEM39A  | 0.44048047 |
| TMEM39B  | 0.32350183 |
| TMEM41A  | 1.7231224  |
| TMEM41B  | 0.66513705 |
| TMEM42   | 0.4993894  |
| TMEM5    | 1.4380126  |
| TMEM50A  | 1.861903   |
| TMEM51   | 2.440327   |
| TMEM53   | 4.4434557  |
| TMEM55B  | 2.0222747  |
| TMEM56   | 4.2034636  |



|           |            |
|-----------|------------|
| TMEM57    | 1.3196833  |
| TMEM59    | 0.7018764  |
| TMEM60    | 2.0724223  |
| TMEM62    | 2.1104538  |
| TMEM63B   | 0.47438407 |
| TMEM64    | 1.6868632  |
| TMEM66    | 1.9576623  |
| TMEM67    | 1.9729369  |
| TMEM68    | 1.3060181  |
| TMEM70    | 2.8072565  |
| TMEM8     | 2.465944   |
| TMEM80    | 0.57974577 |
| TMEM82    | 3.399821   |
| TMEM86A   | 1.7270219  |
| TMEM86B   | 1.9971197  |
| TMEM87B   | 3.2610962  |
| TMEM88B   | 2.0138693  |
| TMEM9     | 0.4641564  |
| TMEM97    | 4.0544252  |
| TMEM98    | 0.38684773 |
| TMEM9B    | 0.9981048  |
| TMF1      | 1.2250769  |
| TMIE      | 1.2256546  |
| TMLHE     | 1.4101324  |
| TMPRSS11B | 1.3865936  |
| TMPRSS3   | 3.9323547  |
| TMPRSS6   | 3.453274   |
| TMPRSS7   | 1.1442513  |
| TMSB15A   | 1.066293   |
| TMSB4X    | 0.84238124 |
| TMTC2     | 1.3257496  |
| TMTC3     | 0.9208939  |
| TMUB1     | 1.4596474  |
| TMUB2     | 1.676203   |
| TMX1      | 2.3463652  |
| TMX2      | 1.3646858  |
| TMX4      | 1.8362386  |
| TNF       | 4.244586   |
| TNFAIP1   | 1.1355035  |
| TNFAIP2   | 3.1792967  |
| TNFAIP3   | 5.247488   |
| TNFAIP8L1 | 2.8470395  |
| TNFRSF10B | 2.108526   |
| TNFRSF11B | 2.934666   |
| TNFRSF12A | 5.4741993  |

|          |            |
|----------|------------|
| TNFRSF1A | 2.2135608  |
| TNFRSF1B | 1.2645538  |
| TNFRSF21 | 1.196537   |
| TNFRSF22 | 2.7385025  |
| TNFRSF23 | 2.7764728  |
| TNFRSF4  | 1.4649465  |
| TNFRSF9  | 3.648309   |
| TNFSF11  | 1.1197088  |
| TNFSF9   | 2.4653876  |
| TNIP1    | 3.1249626  |
| TNIP2    | 2.5131862  |
| TNKS     | 0.82971954 |
| TNKS2    | 1.1992843  |
| TNNT1    | 0.3625605  |
| TNPO1    | 2.231067   |
| TNPO2    | 2.4255865  |
| TNPO3    | 2.4849021  |
| TNRC18   | 0.6902249  |
| TNRC6A   | 0.83282685 |
| TNRC6B   | 1.2760394  |
| TOB1     | 2.8473256  |
| TOB2     | 2.2151597  |
| TOE1     | 1.4661028  |
| TOLLIP   | 1.6692741  |
| TOM1     | 1.9945333  |
| TOM1L1   | 2.0160625  |
| TOM1L2   | 1.6178625  |
| TOMM20   | 2.5193717  |
| TOMM22   | 1.1628969  |
| TOMM34   | 0.8930638  |
| TOMM40   | 1.4923012  |
| TOMM40L  | 1.0193865  |
| TOMM5    | 1.2163255  |
| TOMM6    | 1.9770973  |
| TOMM7    | 1.3984416  |
| TOMM70A  | 1.7541525  |
| TOP1     | 1.2931716  |
| TOP1MT   | 3.1273735  |
| TOP3A    | 1.8802595  |
| TOP3B    | 0.6990135  |
| TOPORS   | 2.5437973  |
| TOPORSOS | 0.6979811  |
| TOR1A    | 2.7326896  |
| TOR1AIP1 | 1.6108062  |
| TOR1AIP2 | 2.8065984  |

|          |            |
|----------|------------|
| TOR1B    | 1.3572466  |
| TOR2A    | 2.7271469  |
| TOR3A    | 0.6628754  |
| TOX      | 5.190653   |
| TOX4     | 1.8112166  |
| TPD52    | 1.2258337  |
| TPD52L1  | 4.090708   |
| TPD52L2  | 1.8774321  |
| TPGS1    | 1.4874327  |
| TPI1     | 4.0703726  |
| TPK1     | 0.8210437  |
| TPM3     | 0.5509765  |
| TPMT     | 3.9009101  |
| TPP1     | 1.7043617  |
| TPP2     | 1.311455   |
| TPR      | 0.81210494 |
| TPRA1    | 1.1406062  |
| TPRGL    | 0.61435914 |
| TPRKB    | 2.511935   |
| TPRN     | 0.94741416 |
| TPST2    | 1.0791242  |
| TPT1     | 1.7629023  |
| TRA2A    | 0.95558333 |
| TRABD    | 3.1420224  |
| TRADD    | 1.9492948  |
| TRAF1    | 0.44112086 |
| TRAF2    | 2.5141637  |
| TRAF3    | 1.0559762  |
| TRAF4    | 3.422548   |
| TRAF6    | 1.5576911  |
| TRAFD1   | 2.0235426  |
| TRAK2    | 1.0160632  |
| TRAM1    | 2.349913   |
| TRAM2    | 1.562433   |
| TRAP1    | 3.0544465  |
| TRAPPC1  | 1.4833233  |
| TRAPPC10 | 1.2950199  |
| TRAPPC11 | 2.7602012  |
| TRAPPC12 | 1.9789603  |
| TRAPPC13 | 1.8548143  |
| TRAPPC2  | 0.8284285  |
| TRAPPC2L | 1.2865837  |
| TRAPPC3  | 2.1393201  |
| TRAPPC3L | 1.4826169  |
| TRAPPC4  | 1.248205   |

|          |            |
|----------|------------|
| TRAPPC5  | 2.2604654  |
| TRAPPC6A | 1.271724   |
| TRAPPC6B | 1.8991215  |
| TRAPPC8  | 0.8891251  |
| TRAT1    | 2.876739   |
| TRDMT1   | 0.8996651  |
| TREH     | 6.198758   |
| TREM1    | 0.8703182  |
| TREM3    | 0.9644885  |
| TREX1    | 2.6933005  |
| TRF      | 4.563835   |
| TRIAP1   | 0.9063089  |
| TRIB1    | 3.6766222  |
| TRIB3    | 4.731695   |
| TRIM11   | 2.5563886  |
| TRIM12A  | 2.0865366  |
| TRIM12C  | 1.7212641  |
| TRIM13   | 0.65975547 |
| TRIM14   | 2.3336203  |
| TRIM2    | 0.9997456  |
| TRIM21   | 1.2790763  |
| TRIM23   | 1.6904674  |
| TRIM24   | 3.4252832  |
| TRIM25   | 2.6994507  |
| TRIM26   | 1.2555263  |
| TRIM27   | 2.6159613  |
| TRIM28   | 1.3450692  |
| TRIM3    | 0.5442908  |
| TRIM30A  | 2.02583    |
| TRIM30D  | 2.4949658  |
| TRIM32   | 1.279196   |
| TRIM33   | 0.41078258 |
| TRIM34A  | 0.79655194 |
| TRIM34B  | 0.9151962  |
| TRIM39   | 1.3950863  |
| TRIM41   | 2.0836747  |
| TRIM43C  | 0.76584744 |
| TRIM44   | 0.45645022 |
| TRIM47   | 2.50717    |
| TRIM5    | 0.9906802  |
| TRIM56   | 1.549525   |
| TRIM6    | 2.3693404  |
| TRIM68   | 1.0459709  |
| TRIM8    | 0.8653977  |
| TRIO     | 0.83149076 |

|           |            |
|-----------|------------|
| TRIOBP    | 0.50217414 |
| TRIP10    | 0.6835096  |
| TRIP11    | 1.5170882  |
| TRIP13    | 0.87333274 |
| TRIP4     | 1.4638903  |
| TRIP6     | 1.9998267  |
| TRIT1     | 1.1760557  |
| TRMT1     | 1.5015147  |
| TRMT10C   | 1.720571   |
| TRMT11    | 2.0169375  |
| TRMT112   | 1.4404557  |
| TRMT13    | 0.8173816  |
| TRMT1L    | 1.4716985  |
| TRMT2A    | 1.5551212  |
| TRMT2B    | 1.4469283  |
| TRMT5     | 0.3115132  |
| TRMT6     | 0.64380836 |
| TRMT61A   | 3.8379614  |
| TRMT61B   | 1.5936921  |
| TRMU      | 1.2519677  |
| TRNAU1AP  | 2.2304704  |
| TRNT1     | 2.017986   |
| TRP53BP1  | 1.1984744  |
| TRP53INP1 | 4.769203   |
| TRP53INP2 | 1.1593792  |
| TRP53RK   | 1.5272894  |
| TRP63     | 1.0652988  |
| TRPC4AP   | 1.8108904  |
| TRPM2     | 1.5095618  |
| TRPM7     | 1.1561048  |
| TRRAP     | 0.918643   |
| TRUB2     | 2.1646187  |
| TSC1      | 2.2811458  |
| TSC22D4   | 0.59630656 |
| TSEN2     | 0.71002793 |
| TSEN54    | 1.96682    |
| TSFM      | 1.079263   |
| TSG101    | 1.4513433  |
| TSHZ2     | 0.6194627  |
| TSKU      | 1.3386612  |
| TSN       | 1.2216742  |
| TSNAX     | 1.1909878  |
| TSPAN12   | 2.7034976  |
| TSPAN31   | 3.9051526  |
| TSPAN33   | 2.3858287  |

|         |            |
|---------|------------|
| TSPAN4  | 2.9654715  |
| TSPAN9  | 0.3863542  |
| TSPO    | 1.0253127  |
| TSPO2   | 0.76885724 |
| TSPYL1  | 0.7632086  |
| TSPYL2  | 2.5916774  |
| TSR1    | 1.9409287  |
| TSR3    | 2.0944874  |
| TSSC4   | 1.8313653  |
| TST     | 1.818423   |
| TSTA3   | 2.3978627  |
| TSTD1   | 3.8918254  |
| TSTD2   | 1.782448   |
| TSTD3   | 2.0616024  |
| TTBK2   | 1.0732534  |
| TTC1    | 2.222813   |
| TTC13   | 1.8367331  |
| TTC14   | 0.7121408  |
| TTC17   | 1.3361075  |
| TTC19   | 1.8761928  |
| TTC21B  | 0.5389092  |
| TTC23   | 1.7244537  |
| TTC27   | 1.5358198  |
| TTC3    | 0.8145611  |
| TTC30A1 | 0.9243834  |
| TTC32   | 2.77653    |
| TTC33   | 1.468476   |
| TTC36   | 4.4481506  |
| TTC37   | 1.0758929  |
| TTC38   | 1.9627125  |
| TTC39C  | 1.9764183  |
| TTC4    | 1.5899603  |
| TTC7    | 0.81414676 |
| TTC7B   | 0.3110125  |
| TTC9C   | 2.0634463  |
| TTF2    | 1.6283834  |
| TTI1    | 1.6871197  |
| TTI2    | 0.8086407  |
| TTLL12  | 0.95724654 |
| TTLL4   | 2.4984324  |
| TTPA    | 6.776161   |
| TTPAL   | 2.2960684  |
| TTR     | 7.582732   |
| TTYH2   | 2.4599178  |
| TUBA1B  | 0.4064467  |

|            |            |
|------------|------------|
| TUBA1C     | 2.9036038  |
| TUBA4A     | 2.030533   |
| TUBA8      | 1.7631094  |
| TUBB2A     | 2.7173913  |
| TUBB2A-PS2 | 2.3955395  |
| TUBB4A     | 0.82625604 |
| TUBB4B     | 1.542556   |
| TUBB5      | 1.174609   |
| TUBB6      | 2.6449463  |
| TUBD1      | 0.77225566 |
| TUBE1      | 0.38651228 |
| TUBG1      | 1.5402901  |
| TUBGCP2    | 1.5490384  |
| TUBGCP3    | 1.286762   |
| TUBGCP4    | 0.96627116 |
| TUBGCP5    | 0.7750859  |
| TUBGCP6    | 0.930464   |
| TUFM       | 2.6951592  |
| TUFT1      | 0.46551156 |
| TUG1       | 1.4744551  |
| TULP4      | 0.28523993 |
| TUSC1      | 1.3410413  |
| TUSC2      | 1.8743689  |
| TVP23B     | 1.6653378  |
| TWF1       | 2.1966717  |
| TXLNA      | 0.98151803 |
| TXN1       | 2.2896998  |
| TXN2       | 2.0613878  |
| TXNDC11    | 2.388312   |
| TXNDC12    | 1.9513109  |
| TXNDC15    | 1.7205036  |
| TXNDC17    | 1.9403074  |
| TXNDC5     | 1.7020772  |
| TXNDC9     | 1.8962886  |
| TXNL1      | 1.649863   |
| TXNL4A     | 1.6665795  |
| TXNL4B     | 0.73262095 |
| TXNRD1     | 3.4853232  |
| TXNRD2     | 2.6432254  |
| TYMP       | 2.786442   |
| TYMS-PS    | 0.7226186  |
| TYSND1     | 1.7050526  |
| TYW1       | 1.0665421  |
| TYW5       | 1.4818676  |
| U2AF1      | 1.7632735  |

|         |            |
|---------|------------|
| U2SURP  | 0.96837234 |
| UAP1    | 2.0157511  |
| UAP1L1  | 1.0390799  |
| UBA1    | 1.454375   |
| UBA1Y   | 0.5360632  |
| UBA2    | 1.2959502  |
| UBA3    | 0.7923527  |
| UBA5    | 3.014396   |
| UBA52   | 1.5109997  |
| UBA6    | 1.5787663  |
| UBA7    | 2.0798447  |
| UBAC1   | 1.7919137  |
| UBALD1  | 2.1523998  |
| UBALD2  | 1.4921896  |
| UBAP1   | 2.5243862  |
| UBAP2   | 0.9549382  |
| UBAP2L  | 0.5003221  |
| UBB     | 1.958622   |
| UBC     | 2.1371117  |
| UBD     | 4.747978   |
| UBE2A   | 1.2130916  |
| UBE2B   | 2.0071309  |
| UBE2D2A | 1.4738643  |
| UBE2D3  | 2.5245965  |
| UBE2E1  | 1.3842189  |
| UBE2E2  | 2.7039964  |
| UBE2E3  | 1.251363   |
| UBE2F   | 2.420265   |
| UBE2G1  | 1.6215904  |
| UBE2G2  | 1.5666325  |
| UBE2H   | 0.54317117 |
| UBE2I   | 0.6590121  |
| UBE2J1  | 2.1067994  |
| UBE2J2  | 2.1487858  |
| UBE2K   | 1.7431648  |
| UBE2L3  | 1.6782725  |
| UBE2L6  | 2.2582872  |
| UBE2M   | 2.0100954  |
| UBE2N   | 0.9089358  |
| UBE2O   | 1.0415823  |
| UBE2Q1  | 1.2368805  |
| UBE2Q2  | 1.6397846  |
| UBE2QL1 | 2.0192327  |
| UBE2R2  | 1.4547637  |
| UBE2V1  | 0.64661    |



|        |            |
|--------|------------|
| UBE2V2 | 3.8580015  |
| UBE2W  | 1.1482232  |
| UBE2Z  | 1.8710134  |
| UBE3A  | 1.7761681  |
| UBE3B  | 0.95391965 |
| UBE3C  | 1.4319558  |
| UBE4A  | 1.3532603  |
| UBE4B  | 2.0620925  |
| UBFD1  | 2.3967545  |
| UBIAD1 | 1.821945   |
| UBL3   | 0.85255694 |
| UBL4   | 1.8396618  |
| UBL5   | 1.0053265  |
| UBLCP1 | 1.5741732  |
| UBN1   | 1.610698   |
| UBN2   | 0.6811631  |
| UBP1   | 1.525208   |
| UBQLN1 | 2.3253462  |
| UBQLN2 | 1.5725749  |
| UBR1   | 0.8565743  |
| UBR3   | 0.8169153  |
| UBR4   | 2.0962389  |
| UBR5   | 1.7230928  |
| UBR7   | 1.4136531  |
| UBTD1  | 1.5407374  |
| UBTF   | 3.3609674  |
| UBXN1  | 1.9930379  |
| UBXN2A | 1.7569873  |
| UBXN2B | 1.083986   |
| UBXN6  | 2.2698452  |
| UBXN7  | 0.9868264  |
| UBXN8  | 2.7102668  |
| UCL4   | 2.4500473  |
| UCL5   | 1.4830096  |
| UCK1   | 2.1502593  |
| UCK2   | 2.1957405  |
| UCKL1  | 1.8513772  |
| UFC1   | 2.4227054  |
| UFD1L  | 2.9524715  |
| UFL1   | 2.3932703  |
| UFM1   | 2.2194698  |
| UFSP2  | 2.8408     |
| UGCG   | 2.1401794  |
| UGDH   | 2.628864   |
| UGGT1  | 3.080345   |

|           |            |
|-----------|------------|
| UGP2      | 2.1096685  |
| UGT1A10   | 3.3656185  |
| UGT1A6B   | 3.483803   |
| UGT2A3    | 4.925971   |
| UGT2B1    | 2.0214162  |
| UGT2B34   | 6.352518   |
| UGT2B35   | 7.316736   |
| UGT2B36   | 8.459707   |
| UGT2B37   | 4.9288826  |
| UGT2B38   | 5.476617   |
| UGT2B5    | 5.180588   |
| UGT3A1    | 0.5424764  |
| UGT3A2    | 4.0694695  |
| UHMK1     | 0.35205913 |
| UHRF1BP1  | 2.2434595  |
| UHRF1BP1L | 1.9637778  |
| UHRF2     | 1.9890425  |
| ULK1      | 2.4103692  |
| ULK2      | 1.194135   |
| ULK3      | 2.0902297  |
| UMODL1    | 1.7320031  |
| UMPS      | 2.7013333  |
| UNC119B   | 3.5452654  |
| UNC45A    | 1.8644407  |
| UNC50     | 1.6090453  |
| UNC93A    | 3.8130262  |
| UNC93B1   | 1.7959096  |
| UNG       | 3.4591033  |
| UNK       | 3.1086786  |
| UOX       | 9.03797    |
| UPB1      | 7.8422203  |
| UPF1      | 0.4251597  |
| UPF3A     | 0.96037364 |
| UPF3B     | 1.4174216  |
| UPP1      | 2.8174808  |
| UPP2      | 2.9547243  |
| UQCC2     | 1.2280171  |
| UQCR10    | 1.7886155  |
| UQCR11    | 1.7736375  |
| UQCRB     | 2.349797   |
| UQCRC1    | 2.2213018  |
| UQCRC2    | 2.798156   |
| UQCRFS1   | 2.8521497  |
| UQCRH     | 1.8475845  |
| UQCRQ     | 3.3479536  |

|         |            |
|---------|------------|
| URAD    | 2.203345   |
| URAH    | 6.3469877  |
| URB1    | 1.7132137  |
| URB2    | 2.022227   |
| URGCP   | 1.7267272  |
| URI1    | 1.474539   |
| URM1    | 0.5668223  |
| UROC1   | 3.927625   |
| UROD    | 2.03345    |
| UROS    | 2.0294325  |
| USE1    | 1.3140752  |
| USF1    | 0.51361823 |
| USF2    | 1.9591086  |
| USMG5   | 2.4807699  |
| USO1    | 2.7014496  |
| USP1    | 1.7162864  |
| USP10   | 2.3571904  |
| USP12   | 1.2177079  |
| USP14   | 3.0898607  |
| USP15   | 1.9420292  |
| USP16   | 2.4514744  |
| USP17LA | 1.597209   |
| USP17LD | 1.3122027  |
| USP18   | 3.6482294  |
| USP19   | 2.1860845  |
| USP20   | 0.4762187  |
| USP22   | 1.0338359  |
| USP24   | 1.5229468  |
| USP25   | 1.1909468  |
| USP28   | 0.9534738  |
| USP3    | 1.9092987  |
| USP30   | 2.6188576  |
| USP32   | 1.7643726  |
| USP33   | 1.6015303  |
| USP36   | 1.386425   |
| USP38   | 1.9474657  |
| USP4    | 1.6871002  |
| USP40   | 1.6654398  |
| USP42   | 1.5404994  |
| USP45   | 1.4671009  |
| USP47   | 0.98369575 |
| USP48   | 1.0209124  |
| USP5    | 1.2980826  |
| USP50   | 1.8235261  |
| USP53   | 2.8780062  |

|          |            |
|----------|------------|
| USP7     | 1.4345019  |
| USP9X    | 1.7772467  |
| USPL1    | 1.7600205  |
| UTP11L   | 1.8343513  |
| UTP14A   | 1.3993475  |
| UTP15    | 1.6457264  |
| UTP23    | 2.6645334  |
| UTP3     | 1.829148   |
| UTP6     | 1.7272718  |
| UVRAG    | 1.5183551  |
| UXT      | 2.2966797  |
| VAMP2    | 0.29885602 |
| VAMP4    | 0.829921   |
| VAMP7    | 2.200926   |
| VAMP8    | 0.5000527  |
| VANGL1   | 1.3047063  |
| VAPA     | 1.687619   |
| VAPB     | 1.0603683  |
| VARS     | 2.4935234  |
| VASH1    | 1.2347867  |
| VASP     | 1.2247612  |
| VAT1     | 0.5924084  |
| VAV1     | 1.4587705  |
| VAX2     | 1.6331813  |
| VBP1     | 1.1348073  |
| VCAM1    | 1.2052796  |
| VCAN     | 0.9712167  |
| VCP      | 2.1617224  |
| VCPIP1   | 2.20003    |
| VCPKMT   | 1.7261817  |
| VDAC1    | 1.0774558  |
| VDAC2    | 1.2548645  |
| VDAC3    | 1.9247406  |
| VEGFB    | 1.6280625  |
| VEGFC    | 1.9035718  |
| VGf      | 0.47711587 |
| VHL      | 1.3269532  |
| VILL     | 1.9799845  |
| VIMP     | 2.5700948  |
| VIPAS39  | 1.2311423  |
| VIPR1    | 2.752628   |
| VKORC1   | 2.6068923  |
| VKORC1L1 | 1.0267117  |
| VMA21    | 1.788801   |
| VMN1R10  | 1.8296537  |

|          |            |
|----------|------------|
| VMN1R173 | 1.8144424  |
| VMN1R197 | 1.3596363  |
| VMN1R219 | 2.2399235  |
| VMN1R52  | 1.8450823  |
| VMN1R53  | 2.1829295  |
| VMN1R65  | 4.6099052  |
| VMN2R1   | 1.8799467  |
| VMN2R113 | 2.1377225  |
| VMP1     | 3.3119586  |
| VNN1     | 2.351352   |
| VNN3     | 8.400918   |
| VOPP1    | 0.39177108 |
| VPRBP    | 1.4888198  |
| VPS11    | 1.4950869  |
| VPS13A   | 0.39129114 |
| VPS13B   | 1.4563258  |
| VPS13D   | 1.4080222  |
| VPS16    | 1.9373357  |
| VPS18    | 2.52049    |
| VPS25    | 1.8509576  |
| VPS26A   | 1.8865416  |
| VPS26B   | 1.6602046  |
| VPS28    | 1.6117384  |
| VPS29    | 1.7025201  |
| VPS33A   | 1.2072532  |
| VPS33B   | 1.4260738  |
| VPS35    | 1.9453404  |
| VPS36    | 0.6757562  |
| VPS37A   | 1.1358113  |
| VPS37B   | 2.299064   |
| VPS37C   | 1.2703853  |
| VPS39    | 1.1236188  |
| VPS41    | 1.1416614  |
| VPS45    | 0.41145325 |
| VPS4B    | 1.8601716  |
| VPS52    | 1.6490004  |
| VPS54    | 1.0014837  |
| VPS9D1   | 0.63501096 |
| VRK2     | 0.733273   |
| VRK3     | 2.126476   |
| VSIG4    | 4.1426697  |
| VTA1     | 1.8815811  |
| VTI1A    | 0.6636181  |
| VTI1B    | 1.7395308  |
| VTN      | 9.691994   |

|         |            |
|---------|------------|
| VWA3B   | 1.4214971  |
| VWA5A   | 1.1776941  |
| VWA8    | 2.9834054  |
| VWA9    | 1.1628501  |
| VWCE    | 7.0554514  |
| WAC     | 1.1515257  |
| WAPAL   | 2.4258378  |
| WARS    | 1.2772787  |
| WARS2   | 0.6731839  |
| WASF2   | 0.9502213  |
| WASH    | 1.2973635  |
| WASL    | 1.47661    |
| WBP11   | 2.1840522  |
| WBP1L   | 3.8667061  |
| WBP2    | 1.6087005  |
| WBP5    | 1.3563731  |
| WBSCR16 | 3.055156   |
| WBSCR22 | 1.0234978  |
| WBSCR27 | 0.6326487  |
| WDFY2   | 0.43931246 |
| WDFY3   | 1.1797333  |
| WDR1    | 2.3461392  |
| WDR11   | 1.2580211  |
| WDR12   | 2.172766   |
| WDR20   | 0.70405316 |
| WDR24   | 1.9141686  |
| WDR26   | 2.0781982  |
| WDR3    | 1.6725633  |
| WDR31   | 2.7139885  |
| WDR33   | 1.4910419  |
| WDR34   | 2.4261792  |
| WDR35   | 0.61149263 |
| WDR36   | 2.0289853  |
| WDR37   | 0.6888666  |
| WDR4    | 2.9497073  |
| WDR41   | 1.0231059  |
| WDR43   | 1.8887146  |
| WDR45   | 1.0795186  |
| WDR45B  | 1.6107557  |
| WDR46   | 2.0559356  |
| WDR48   | 1.7558925  |
| WDR5    | 2.0479639  |
| WDR53   | 1.5203393  |
| WDR55   | 2.832484   |
| WDR59   | 2.1174474  |

|         |            |
|---------|------------|
| WDR60   | 0.457155   |
| WDR61   | 1.8888128  |
| WDR73   | 2.1923969  |
| WDR74   | 2.120856   |
| WDR75   | 1.3506567  |
| WDR77   | 1.3598192  |
| WDR81   | 2.1420777  |
| WDR82   | 1.075938   |
| WDR83   | 1.5806835  |
| WDR83OS | 1.20384    |
| WDR89   | 3.5338147  |
| WDR91   | 0.75997424 |
| WDR92   | 3.8108413  |
| WDTC1   | 0.73486924 |
| WDYHV1  | 1.3061371  |
| WFDC17  | 4.026886   |
| WFDC18  | 2.6249478  |
| WFDC5   | 1.4410582  |
| WFS1    | 2.3059876  |
| WHAMM   | 2.7184522  |
| WHSC1L1 | 1.2208788  |
| WIPF2   | 1.9174564  |
| WIPI1   | 0.5576589  |
| WIPI2   | 2.444886   |
| WIZ     | 1.9994771  |
| WNT10A  | 3.9796934  |
| WRAP53  | 0.3653581  |
| WRAP73  | 1.5414908  |
| WRNIP1  | 2.874458   |
| WSB1    | 2.4579947  |
| WTAP    | 1.845689   |
| WVOX    | 0.8829229  |
| WWP2    | 2.1224082  |
| XAB2    | 0.61475587 |
| XAF1    | 2.74668    |
| XBP1    | 3.7264204  |
| XCL1    | 0.2909379  |
| XDH     | 3.3872588  |
| XIAP    | 1.3179333  |
| XIST    | 2.7666967  |
| XKR8    | 2.298951   |
| XKR9    | 2.8100166  |
| XLR3A   | 1.1602399  |
| XLR3B   | 1.5550056  |
| XPA     | 2.8773644  |

|         |            |
|---------|------------|
| XPC     | 0.70402694 |
| XPNPEP1 | 1.9780667  |
| XPO1    | 0.92230487 |
| XPO4    | 1.9158392  |
| XPO5    | 1.2536447  |
| XPO6    | 1.9232912  |
| XPOT    | 1.6998379  |
| XPR1    | 1.0867612  |
| XRCC4   | 1.5040405  |
| XRCC5   | 1.8828385  |
| XRCC6   | 1.3277957  |
| XRN1    | 0.8992343  |
| XRN2    | 2.0218642  |
| XYLB    | 3.9069831  |
| XYLT2   | 1.4169362  |
| YAE1D1  | 1.2169683  |
| YAF2    | 1.0270417  |
| YAP1    | 0.7962773  |
| YARS    | 1.3978579  |
| YARS2   | 2.8101246  |
| YBX1    | 0.8293669  |
| YBX3    | 1.2213681  |
| YEATS4  | 1.1070697  |
| YES1    | 1.6000705  |
| YIF1A   | 3.194813   |
| YIF1B   | 1.1932371  |
| YIPF1   | 1.3480852  |
| YIPF2   | 1.7318723  |
| YIPF3   | 1.1760709  |
| YIPF4   | 1.5874708  |
| YIPF5   | 2.6226127  |
| YIPF6   | 0.9573798  |
| YKT6    | 1.012974   |
| YME1L1  | 2.1956134  |
| YOD1    | 2.697273   |
| YPEL2   | 2.0507312  |
| YPEL5   | 1.9291399  |
| YRDC    | 2.467294   |
| YTHDC2  | 2.1687722  |
| YTHDF1  | 1.252465   |
| YTHDF2  | 1.4920204  |
| YTHDF3  | 1.2849772  |
| YWHAB   | 0.7647989  |
| YWHAE   | 1.776139   |
| YWHAG   | 1.6296256  |



|         |            |
|---------|------------|
| YWHAH   | 1.0395105  |
| YWHAQ   | 0.8762562  |
| YWHAZ   | 0.7005193  |
| YY1     | 1.1880963  |
| ZADH2   | 0.7000334  |
| ZBED5   | 1.3092237  |
| ZBED6   | 1.744904   |
| ZBP1    | 3.4072306  |
| ZBTB10  | 1.7087986  |
| ZBTB11  | 0.8225641  |
| ZBTB12  | 0.5421717  |
| ZBTB16  | 2.7988498  |
| ZBTB18  | 1.056617   |
| ZBTB2   | 0.9480455  |
| ZBTB20  | 1.7697284  |
| ZBTB22  | 1.1335442  |
| ZBTB24  | 0.5622597  |
| ZBTB25  | 1.4245732  |
| ZBTB26  | 1.240202   |
| ZBTB33  | 1.1880696  |
| ZBTB34  | 0.45571303 |
| ZBTB39  | 1.7561078  |
| ZBTB40  | 0.9917338  |
| ZBTB43  | 2.1760762  |
| ZBTB48  | 1.3320346  |
| ZBTB5   | 1.1727936  |
| ZBTB6   | 0.8088329  |
| ZBTB7A  | 0.71556973 |
| ZBTB7B  | 1.3234365  |
| ZBTB8B  | 1.0886917  |
| ZBTB8OS | 2.236912   |
| ZBTB9   | 0.39233708 |
| ZC3H11A | 1.679198   |
| ZC3H12A | 1.8815198  |
| ZC3H12C | 1.1898198  |
| ZC3H12D | 0.37791038 |
| ZC3H13  | 2.333999   |
| ZC3H14  | 0.42702365 |
| ZC3H15  | 2.1218545  |
| ZC3H18  | 1.5520365  |
| ZC3H3   | 1.1573722  |
| ZC3H7A  | 2.3147862  |
| ZC3H7B  | 0.38950706 |
| ZC3HAV1 | 1.8307283  |
| ZC3HC1  | 1.1284969  |

|         |            |
|---------|------------|
| ZCCHC10 | 0.80238056 |
| ZCCHC11 | 2.6349795  |
| ZCCHC14 | 0.86116934 |
| ZCCHC17 | 1.0977776  |
| ZCCHC2  | 1.4844716  |
| ZCCHC24 | 2.0577266  |
| ZCCHC3  | 0.79974556 |
| ZCCHC6  | 1.6856544  |
| ZCCHC7  | 1.6466653  |
| ZCCHC8  | 1.7765391  |
| ZCCHC9  | 3.257332   |
| ZCRB1   | 1.5586846  |
| ZDHHC12 | 2.5297587  |
| ZDHHC13 | 2.267679   |
| ZDHHC16 | 1.7049053  |
| ZDHHC17 | 1.1412086  |
| ZDHHC18 | 0.44532943 |
| ZDHHC2  | 1.5861261  |
| ZDHHC20 | 0.84559107 |
| ZDHHC21 | 0.70820355 |
| ZDHHC24 | 1.6393743  |
| ZDHHC4  | 0.64544487 |
| ZDHHC5  | 2.0933254  |
| ZDHHC6  | 2.4202578  |
| ZDHHC7  | 1.030514   |
| ZDHHC9  | 1.1700413  |
| ZER1    | 0.83594584 |
| ZFAND1  | 1.6811621  |
| ZFAND2A | 1.6200845  |
| ZFAND2B | 2.1287477  |
| ZFAND3  | 1.0718648  |
| ZFAND4  | 2.842851   |
| ZFAND5  | 0.9706619  |
| ZFAND6  | 2.0893576  |
| ZFAT    | 0.630816   |
| ZFC3H1  | 2.3735263  |
| ZFHX4   | 2.6428874  |
| ZFML    | 0.8903706  |
| ZFP1    | 1.0251067  |
| ZFP105  | 0.59010863 |
| ZFP106  | 1.5792634  |
| ZFP110  | 1.8196533  |
| ZFP113  | 1.6373193  |
| ZFP119B | 1.7870791  |
| ZFP120  | 0.89897966 |

|           |            |
|-----------|------------|
| ZFP128    | 0.63663197 |
| ZFP131    | 1.6568224  |
| ZFP133-PS | 2.9656498  |
| ZFP14     | 1.2368484  |
| ZFP146    | 0.8893435  |
| ZFP148    | 0.59755635 |
| ZFP180    | 1.8924615  |
| ZFP182    | 0.7223351  |
| ZFP189    | 2.3930986  |
| ZFP191    | 1.3461616  |
| ZFP202    | 2.1967614  |
| ZFP207    | 1.5690691  |
| ZFP212    | 1.0005052  |
| ZFP213    | 1.4997346  |
| ZFP217    | 0.79768586 |
| ZFP229    | 0.8648486  |
| ZFP236    | 2.7445862  |
| ZFP26     | 0.8692591  |
| ZFP260    | 0.9589584  |
| ZFP263    | 1.5668976  |
| ZFP264    | 2.2190185  |
| ZFP275    | 1.9204361  |
| ZFP276    | 1.1495717  |
| ZFP277    | 1.1787231  |
| ZFP280B   | 1.3496537  |
| ZFP280C   | 1.6943214  |
| ZFP280D   | 1.0862038  |
| ZFP281    | 2.691682   |
| ZFP282    | 1.2055228  |
| ZFP292    | 2.2735107  |
| ZFP3      | 1.3106198  |
| ZFP30     | 0.7605407  |
| ZFP316    | 0.9414942  |
| ZFP317    | 0.85592294 |
| ZFP318    | 1.2404883  |
| ZFP326    | 1.4325917  |
| ZFP330    | 3.1163032  |
| ZFP335    | 2.0569248  |
| ZFP341    | 0.7399235  |
| ZFP35     | 1.2809451  |
| ZFP354A   | 0.422251   |
| ZFP358    | 1.1413     |
| ZFP36     | 4.127426   |
| ZFP367    | 0.8544431  |
| ZFP36L1   | 2.2696269  |

|         |            |
|---------|------------|
| ZFP36L2 | 0.84445596 |
| ZFP384  | 1.5448194  |
| ZFP386  | 1.1470907  |
| ZFP397  | 1.0697544  |
| ZFP40   | 0.34203124 |
| ZFP407  | 1.1252325  |
| ZFP408  | 1.6928027  |
| ZFP410  | 1.4571841  |
| ZFP414  | 0.6049268  |
| ZFP426  | 1.0612051  |
| ZFP429  | 2.6898339  |
| ZFP433  | 1.6638656  |
| ZFP442  | 0.9356811  |
| ZFP445  | 1.3772624  |
| ZFP446  | 1.7443209  |
| ZFP451  | 0.40542102 |
| ZFP457  | 0.99345946 |
| ZFP458  | 1.2896562  |
| ZFP488  | 1.9897063  |
| ZFP507  | 1.7322087  |
| ZFP51   | 1.1365783  |
| ZFP511  | 1.1875122  |
| ZFP512  | 1.0312023  |
| ZFP513  | 2.537526   |
| ZFP518B | 0.74949574 |
| ZFP523  | 0.6365135  |
| ZFP524  | 1.4330423  |
| ZFP53   | 0.7063105  |
| ZFP553  | 1.4208457  |
| ZFP558  | 0.9833343  |
| ZFP566  | 0.962178   |
| ZFP568  | 2.5296304  |
| ZFP574  | 0.8008692  |
| ZFP58   | 0.4799552  |
| ZFP59   | 0.8695569  |
| ZFP592  | 1.3260553  |
| ZFP593  | 1.7305672  |
| ZFP597  | 0.67298317 |
| ZFP598  | 3.2118642  |
| ZFP607  | 0.51983786 |
| ZFP612  | 3.9329784  |
| ZFP618  | 0.9538908  |
| ZFP62   | 1.0265718  |
| ZFP622  | 2.0539367  |
| ZFP623  | 2.014295   |

|        |            |
|--------|------------|
| ZFP626 | 0.7233224  |
| ZFP628 | 1.7235451  |
| ZFP629 | 0.6290381  |
| ZFP637 | 0.5395086  |
| ZFP639 | 1.6425812  |
| ZFP64  | 1.4024265  |
| ZFP653 | 2.405132   |
| ZFP654 | 1.078099   |
| ZFP655 | 2.987397   |
| ZFP658 | 2.323723   |
| ZFP661 | 1.9894569  |
| ZFP663 | 0.3822286  |
| ZFP668 | 1.5770733  |
| ZFP672 | 0.91964316 |
| ZFP68  | 1.0154507  |
| ZFP687 | 1.1721804  |
| ZFP688 | 0.97329736 |
| ZFP689 | 1.4699135  |
| ZFP691 | 2.4848406  |
| ZFP692 | 1.2194707  |
| ZFP706 | 0.99437785 |
| ZFP707 | 0.4521973  |
| ZFP709 | 1.3813736  |
| ZFP715 | 1.6769991  |
| ZFP746 | 1.650059   |
| ZFP747 | 0.9589803  |
| ZFP758 | 0.5645063  |
| ZFP764 | 0.5431421  |
| ZFP768 | 0.7282622  |
| ZFP770 | 1.3695736  |
| ZFP771 | 1.5707953  |
| ZFP777 | 1.7637436  |
| ZFP787 | 2.094084   |
| ZFP790 | 1.4068682  |
| ZFP791 | 3.5458963  |
| ZFP800 | 2.5402305  |
| ZFP809 | 1.5121658  |
| ZFP81  | 0.54153085 |
| ZFP811 | 1.2940509  |
| ZFP825 | 1.0784335  |
| ZFP830 | 1.1754     |
| ZFP865 | 0.7999575  |
| ZFP867 | 1.4808271  |
| ZFP868 | 1.5936434  |
| ZFP869 | 1.5139277  |

|          |            |
|----------|------------|
| ZFP871   | 1.8457491  |
| ZFP872   | 2.2090495  |
| ZFP9     | 1.5334637  |
| ZFP90    | 0.8851707  |
| ZFP91    | 0.8479042  |
| ZFP93    | 1.0393233  |
| ZFP931   | 1.6515062  |
| ZFP935   | 1.0063691  |
| ZFP938   | 1.5109539  |
| ZFP943   | 1.3532627  |
| ZFP944   | 0.606725   |
| ZFP945   | 0.8056185  |
| ZFP946   | 1.5746443  |
| ZFP947   | 1.4802921  |
| ZFP949   | 0.9641907  |
| ZFP953   | 0.9557116  |
| ZFP954   | 1.861131   |
| ZFP955A  | 0.50233436 |
| ZFP955B  | 1.2768767  |
| ZFP956   | 0.4558761  |
| ZFP959   | 1.7855422  |
| ZFP960   | 0.94607186 |
| ZFP961   | 1.1651165  |
| ZFP963   | 1.0808659  |
| ZFPL1    | 0.62326884 |
| ZFPM1    | 2.3938677  |
| ZFYVE1   | 1.2841156  |
| ZFYVE16  | 1.369271   |
| ZFYVE19  | 1.7329085  |
| ZFYVE20  | 1.1497991  |
| ZFYVE26  | 2.997327   |
| ZFYVE27  | 1.3164618  |
| ZGLP1    | 0.3593061  |
| ZHX1     | 1.0518959  |
| ZHX2     | 0.80755854 |
| ZHX3     | 1.5666854  |
| ZKSCAN1  | 1.770015   |
| ZKSCAN17 | 2.1630442  |
| ZKSCAN3  | 1.5315187  |
| ZKSCAN5  | 1.225951   |
| ZKSCAN6  | 2.3033779  |
| ZKSCAN7  | 1.2518785  |
| ZMAT1    | 0.87430024 |
| ZMAT2    | 1.9279039  |
| ZMAT3    | 0.64627457 |

|          |            |
|----------|------------|
| ZMAT5    | 0.8395529  |
| ZMIZ1    | 0.4163816  |
| ZMIZ2    | 0.3874452  |
| ZMPSTE24 | 1.9877212  |
| ZMYM2    | 0.8141873  |
| ZMYM3    | 1.0333021  |
| ZMYM4    | 0.36830497 |
| ZMYM5    | 0.9618027  |
| ZMYM6    | 1.0547769  |
| ZMYND15  | 1.122772   |
| ZMYND19  | 1.643606   |
| ZMYND8   | 0.3938992  |
| ZNFX1    | 1.9758556  |
| ZNHIT1   | 2.4699857  |
| ZNHIT2   | 2.0289075  |
| ZNHIT3   | 0.7472191  |
| ZNHIT6   | 1.2219512  |
| ZNRD1    | 1.124006   |
| ZNRD1AS  | 2.247523   |
| ZNRF1    | 3.0695922  |
| ZNRF2    | 1.8060188  |
| ZPR1     | 3.3598835  |
| ZRANB1   | 1.9015925  |
| ZRANB2   | 1.8171413  |
| ZRSR1    | 0.9823892  |
| ZSCAN12  | 1.9303687  |
| ZSCAN21  | 1.6447008  |
| ZSCAN22  | 2.2971237  |
| ZSCAN26  | 1.8168552  |
| ZSCAN29  | 1.4605961  |
| ZSWIM3   | 0.60669017 |
| ZSWIM5   | 0.5378027  |
| ZSWIM7   | 2.9487803  |
| ZSWIM8   | 1.6805346  |
| ZUFSP    | 1.7766192  |
| ZW10     | 1.9985969  |
| ZWINT    | 3.3023264  |
| ZXDB     | 0.25377607 |
| ZXDC     | 1.1263449  |
| ZYG11B   | 1.4737761  |
| ZYX      | 2.4390628  |
| ZZEF1    | 0.9962504  |
| ZZZ3     | 1.5741413  |
