# Supplementary material for: Genome wide host gene expression analysis in mice experimentally infected with Pasteurella multocida
Source: PubMed Central journal article supplement (PMC5509158; doi:10.1371/journal.pone.0179420), 2017-07-13
Supplement: pone.0179420.s011.pdf [file pone.0179420.s011.pdf]

**Spleen\_onset**

| <b>Genes</b> | <b>Log2 Fold Change</b> |
|--------------|-------------------------|
| ACVR1B       | 0.96345997              |
| BCL2A1C      | 2.4746747               |
| BCL2A1D      | 2.2620535               |
| BCL3         | 2.5083609               |
| BIRC3        | 1.7918692               |
| BLNK         | 1.0292406               |
| BMP7         | 1.1134183               |
| BTK          | 0.85606337              |
| CACNA1S      | 0.60127115              |
| CACNB3       | 0.9284253               |
| CARD6        | 0.6339812               |
| CASP1        | 0.335742                |
| CBLB         | 0.43734598              |
| CCL1         | 1.0456791               |
| CCL12        | 3.931994                |
| CCL17        | 3.5015655               |
| CCL2         | 5.819554                |
| CCL3         | 6.103713                |
| CCL4         | 5.4779468               |
| CCL5         | 0.49696016              |
| CCL7         | 4.6872835               |
| CCND2        | 0.78052616              |
| CCR7         | 1.4655972               |
| CCR8         | 0.92099                 |
| CD14         | 3.7933016               |
| CD19         | 0.5951886               |
| CD247        | 0.33286548              |
| CD3D         | 0.5978079               |
| CD3E         | 0.6034322               |
| CD40         | 1.3697929               |
| CD70         | 1.3753386               |
| CD72         | 0.57064486              |
| CD86         | 0.50169086              |
| CEBPB        | 1.6610742               |
| CISH         | 0.90105677              |
| CR2          | 1.3522501               |
| CREB3        | 0.4756117               |
| CREB3L2      | 0.34491014              |
| CREBBP       | 0.38971472              |
| CRK          | 1.0127664               |
| CRLF2        | 0.32533884              |
| CSF1         | 0.7434416               |
| CSF2         | 3.7690778               |

|         |            |
|---------|------------|
| CSF2RB  | 1.158124   |
| CSF3    | 6.319416   |
| CX3CL1  | 3.4323378  |
| CXCL1   | 7.3250604  |
| CXCL12  | 0.5335994  |
| CXCL13  | 2.3379927  |
| CXCL16  | 1.0202079  |
| CXCL2   | 5.6254663  |
| CXCL3   | 3.0072234  |
| CXCL5   | 4.432497   |
| CXCL9   | 1.2320042  |
| CXCR1   | 0.7033982  |
| CXCR2   | 1.1469035  |
| CXCR5   | 0.93828917 |
| DAPP1   | 0.4347887  |
| DDX58   | 1.5684328  |
| DUSP1   | 1.813592   |
| DUSP2   | 2.0593934  |
| DUSP4   | 0.5186863  |
| DUSP5   | 1.5932579  |
| DUSP6   | 0.2666397  |
| DUSP7   | 0.3711319  |
| EDN1    | 2.933407   |
| EGFR    | 1.3677685  |
| ELK4    | 0.41202116 |
| ELMO1   | 1.2934918  |
| ERC1    | 0.19318318 |
| FAS     | 2.230434   |
| FCGR2B  | 0.56067276 |
| FGF17   | 1.9941056  |
| FGF21   | 2.7406847  |
| FGF23   | 0.5094714  |
| FGF3    | 0.7985103  |
| FGFR2   | 0.33660364 |
| FLNA    | 0.18988705 |
| FLNB    | 1.6300769  |
| FOS     | 2.1918736  |
| GADD45B | 2.3357725  |
| GADD45G | 1.1872578  |
| GH      | 0.38226533 |
| GM1987  | 0.37803888 |
| GM5431  | 1.1910133  |
| GNAI1   | 0.8681202  |
| GNAI3   | 0.27142525 |
| GNB3    | 1.3350627  |

|          |            |
|----------|------------|
| GNG4     | 2.3555913  |
| GNGT1    | 0.8952031  |
| HCK      | 1.2153425  |
| HSP90AB1 | 0.4672227  |
| HSP90B1  | 0.34009457 |
| HSPA1A   | 3.166572   |
| HSPA8    | 0.27772903 |
| HSPB1    | 0.982038   |
| ICAM1    | 1.8613701  |
| IFNA11   | 1.322186   |
| IFNA2    | 1.3797648  |
| IFNA5    | 0.34543228 |
| IFNAB    | 0.711653   |
| IFNAR1   | 0.40117884 |
| IFNB1    | 4.2508535  |
| IFNG     | 2.2231216  |
| IFNK     | 0.7872491  |
| IFNLR1   | 1.0511222  |
| IKBKE    | 1.7415485  |
| IL10     | 3.0187025  |
| IL12RB1  | 0.43586683 |
| IL12RB2  | 0.5335758  |
| IL15RA   | 0.35707092 |
| IL17A    | 4.235691   |
| IL17RA   | 0.43265915 |
| IL17RB   | 0.7269478  |
| IL18     | 2.1502886  |
| IL1A     | 3.4575286  |
| IL1B     | 3.6146836  |
| IL1R1    | 0.7844062  |
| IL1R2    | 3.8958745  |
| IL1RAP   | 0.866173   |
| IL2      | 1.6852891  |
| IL21     | 1.0160687  |
| IL22     | 2.760804   |
| IL23A    | 2.2281535  |
| IL2RA    | 1.5691333  |
| IL2RB    | 0.40103436 |
| IL2RG    | 0.66580486 |
| IL3      | 0.560683   |
| IL4RA    | 1.0030823  |
| IL6      | 7.7868     |
| IL7R     | 1.537682   |
| INHBB    | 3.5881553  |
| INHBE    | 1.0299551  |

|          |            |
|----------|------------|
| INPP5D   | 0.3787489  |
| IRAK4    | 0.5152557  |
| IRF7     | 0.86910915 |
| IRF9     | 0.5210638  |
| ITK      | 1.6315999  |
| JAK1     | 0.3892331  |
| JUN      | 1.9825015  |
| LAT      | 0.65722466 |
| LIF      | 3.2432673  |
| LTA      | 0.7635517  |
| LY96     | 0.63618517 |
| LYN      | 1.2226291  |
| MALT1    | 1.9365711  |
| MAP2K1   | 0.575624   |
| MAP3K1   | 0.24604177 |
| MAP3K2   | 0.3439293  |
| MAP3K6   | 0.73636675 |
| MAP3K7   | 0.3022437  |
| MAP3K8   | 2.2708101  |
| MAP4K4   | 0.7238984  |
| MAPK11   | 0.5933237  |
| MAPK7    | 0.17284966 |
| MAPK8IP3 | 0.31309128 |
| MAPKAPK2 | 0.74232197 |
| MEFV     | 2.3576398  |
| MLKL     | 0.2870283  |
| MMP14    | 1.2270918  |
| MMP3     | 4.6143565  |
| MOS      | 0.5846329  |
| MRAS     | 0.8819952  |
| MYC      | 0.6991663  |
| MYD88    | 0.7676439  |
| NAIP1    | 0.41405582 |
| NAIP5    | 0.7294464  |
| NAIP6    | 0.45552874 |
| NCF1     | 0.72144413 |
| NCK1     | 0.34001875 |
| NFATC1   | 0.5206857  |
| NFKB1    | 0.9200554  |
| NFKBIA   | 2.0004086  |
| NFKBIB   | 0.6005111  |
| NFKBIE   | 0.6565237  |
| NGF      | 0.8468089  |
| NLRC4    | 0.9657941  |
| NLRP1B   | 0.8176739  |

|         |            |
|---------|------------|
| NOD2    | 1.6788135  |
| NR4A1   | 1.2403183  |
| OSM     | 0.85199237 |
| PDCD1   | 1.9777141  |
| PDGFA   | 0.43289042 |
| PDGFB   | 0.28980398 |
| PIK3AP1 | 1.0657673  |
| PIK3CD  | 0.36889696 |
| PIK3R3  | 0.25750852 |
| PIK3R5  | 1.3595438  |
| PLCG1   | 0.34619188 |
| PLCG2   | 0.22274733 |
| PPP3CC  | 0.7646642  |
| PPP3R1  | 0.6312361  |
| PRKCB   | 0.33858776 |
| PRKCDBP | -0.63376   |
| PRKCD   | 0.32718897 |
| PRKCQ   | 0.71636057 |
| PRKCZ   | 0.55051756 |
| PRLR    | 0.43642306 |
| PTGS2   | 4.569454   |
| RAC3    | 0.50417805 |
| RAP1B   | 0.2570758  |
| RAPGEF2 | 1.5914574  |
| RASA2   | 0.7406697  |
| RASGRP1 | 0.48708677 |
| RELA    | 0.70981216 |
| RELB    | 1.4534655  |
| RIPK2   | 0.97716165 |
| RRAS2   | 0.622684   |
| SAMD4B  | 0.6204052  |
| SELE    | 3.420521   |
| SHC1    | -0.6657839 |
| SOCS1   | 2.3679256  |
| SOCS2   | 0.20260286 |
| SOCS3   | 3.2041326  |
| SOS1    | 1.6331842  |
| SPRED1  | 0.96666336 |
| SPRY2   | 1.2943351  |
| SPRY4   | -0.5819664 |
| STAM2   | 2.5545406  |
| STAT1   | 1.0214672  |
| STAT2   | 1.2864275  |
| STAT3   | 1.005301   |
| STAT6   | 0.3228054  |

|           |            |
|-----------|------------|
| STK3      | -0.5531182 |
| STMN1     | -1.0562091 |
| SUGT1     | 0.32975435 |
| TAB1      | -0.9211865 |
| TAB3      | -0.8282819 |
| TAOK2     | -0.382194  |
| TBK1      | 0.35324144 |
| TEC       | -0.286778  |
| TGFB1     | -0.6595635 |
| TGFB2     | -1.1781433 |
| TGFB3     | -0.4442935 |
| TGFBR2    | 0.34888315 |
| TIAM1     | -0.9851229 |
| TLR2      | 2.0033488  |
| TLR4      | -0.3496447 |
| TLR6      | 1.0655465  |
| TNF       | 4.206231   |
| TNFRSF12A | 2.5400085  |
| TNFRSF13C | 0.46550798 |
| TNFRSF17  | -0.5914836 |
| TNFRSF18  | 1.2053876  |
| TNFRSF1A  | -0.2380071 |
| TNFRSF1B  | 0.32127953 |
| TNFRSF25  | 1.1673217  |
| TNFRSF4   | 1.586935   |
| TNFRSF9   | 0.23494434 |
| TNFSF10   | 1.0401459  |
| TNFSF11   | 0.4711504  |
| TNFSF12   | -0.3223906 |
| TNFSF13B  | -0.4890971 |
| TNFSF14   | 0.30798817 |
| TNFSF15   | 3.2862554  |
| TNFSF8    | 1.4789319  |
| TNFSF9    | 2.413536   |
| TOLLIP    | -0.5118837 |
| TRAF2     | 0.491055   |
| TRAF3     | 0.47019863 |
| TRAF6     | 0.3756194  |
| TRIM25    | 0.37845087 |
| TRIP6     | -0.3255639 |
| TRP53     | -0.6132464 |
| TYK2      | 0.29271603 |
| VAV1      | 0.8113737  |
| VAV3      | -0.6824346 |
| VCAM1     | -0.7154884 |

|       |            |
|-------|------------|
| VEGFA | -0.8008142 |
| VEGFB | -1.1410198 |
| VEGFC | -1.2073183 |
| WAS   | -0.6120701 |
| XCL1  | 0.30977297 |
| XCR1  | -2.2377143 |
| ZAK   | -0.4376452 |

## Spleen\_late

| Gene    | Log2 Fold change |
|---------|------------------|
| ACKR3   | 0.7997894        |
| ACVR1B  | 1.3582897        |
| AGAP2   | -0.5733433       |
| AMH     | 1.2005613        |
| ANGPT2  | 2.6205568        |
| ATF4    | 0.79725313       |
| ATM     | 0.6132984        |
| BAD     | -0.4769177       |
| BCL2    | 0.7351556        |
| BCL2L11 | 1.0366507        |
| BCL3    | 1.9547296        |
| BCL6    | 0.5312166        |
| BIRC3   | 1.9350433        |
| BMP7    | 1.6369331        |
| BMPR2   | 0.9772258        |
| BNIP3   | 2.2024431        |
| BRCA1   | -1.7640951       |
| C1QA    | 0.7156954        |
| C1QB    | 0.51039505       |
| C1S2    | 1.2778034        |
| C2      | 1.2307281        |
| C3      | 0.7633176        |
| C4B     | 0.41171455       |
| C6      | -1.434247        |
| C8G     | -0.8840294       |
| CASP1   | 0.58240604       |
| CASP3   | -0.5348868       |
| CASP7   | 0.5146618        |
| CASP9   | -0.7539864       |
| CAT     | -1.1805663       |
| CCL11   | 3.6174178        |
| CCL12   | 4.6193776        |
| CCL17   | 4.744754         |
| CCL2    | 5.3522506        |
| CCL24   | -3.1804965       |
| CCL3    | 4.9520144        |
| CCL4    | 4.180287         |
| CCL5    | 1.5208344        |
| CCL6    | -0.9950681       |
| CCL7    | 4.4948425        |
| CCNB1   | -2.176187        |
| CCNB2   | -2.14392         |
| CCND1   | -0.9427037       |



|         |            |
|---------|------------|
| CCND2   | 1.0789857  |
| CCNE1   | -2.7541738 |
| CCR3    | -3.5069168 |
| CCR5    | 0.91781616 |
| CCR7    | 3.0074916  |
| CCR8    | 1.3972266  |
| CD40    | 1.6711459  |
| CD40LG  | 1.0035646  |
| CD46    | 0.7283685  |
| CD70    | 3.776894   |
| CDK2    | -0.9675107 |
| CDK4    | -0.3636069 |
| CDKN2B  | 2.2646983  |
| CDKN2D  | -1.0221882 |
| CEBPB   | 2.1257248  |
| CFB     | 2.6256056  |
| CFD     | -0.9784207 |
| CFH     | 0.6654563  |
| CNTF    | -0.5630128 |
| COL1A1  | -1.8550992 |
| COL1A2  | -1.3854785 |
| COL27A1 | -1.4342406 |
| COL3A1  | -1.1381044 |
| COL4A1  | 1.8997579  |
| COL4A2  | 1.5939484  |
| COL5A1  | -1.4760485 |
| COL5A2  | -0.510073  |
| COL6A1  | -1.5712943 |
| COL6A2  | -2.066215  |
| COL6A3  | -0.7026472 |
| CR2     | -1.3124251 |
| CREB3   | 0.82386875 |
| CREB3L2 | 0.6433735  |
| CREB3L3 | 0.50530124 |
| CRLF2   | 0.72201633 |
| CRTC2   | 0.8520441  |
| CSF1    | 0.64739084 |
| CSF2    | 3.3582351  |
| CSF2RB2 | 1.4450054  |
| CSF3    | 7.7814903  |
| CSNK1E  | 0.4096694  |
| CTF1    | -0.3297546 |
| CX3CL1  | 3.5762076  |
| CX3CR1  | -3.1579487 |
| CXCL1   | 7.2812123  |

|          |            |
|----------|------------|
| CXCL12   | 1.516212   |
| CXCL13   | 3.2444267  |
| CXCL14   | 2.764743   |
| CXCL16   | 0.9963064  |
| CXCL2    | 7.023438   |
| CXCL3    | 7.1417766  |
| CXCL5    | 4.157993   |
| CXCL9    | 2.7529125  |
| CXCR1    | -0.8159263 |
| CXCR3    | -0.7436781 |
| CXCR5    | 1.0957842  |
| DAF2     | 0.9524827  |
| DDIT4    | 1.1502337  |
| EDN1     | 4.6177106  |
| EFNA1    | 0.8041768  |
| EFNA5    | 0.98385835 |
| EGF      | 1.469341   |
| EIF4EBP1 | 0.54106426 |
| EP300    | -0.7488952 |
| EPHA2    | 0.64326954 |
| EPOR     | -3.3061824 |
| ERBB2IP  | 0.40000343 |
| F10      | 1.4702606  |
| F12      | 1.2138221  |
| F2       | 1.9110074  |
| F3       | 0.98152924 |
| F5       | -1.7792315 |
| F7       | 0.9847896  |
| F8       | -1.5031998 |
| FAS      | 1.6610918  |
| FGA      | 3.5082033  |
| FGB      | 5.4701514  |
| FGF1     | -1.6518917 |
| FGF21    | 1.6749434  |
| FGF7     | 1.4780598  |
| FGFR1    | 0.3340187  |
| FGFR3    | -0.9445927 |
| FGFR4    | -2.4488847 |
| FGG      | 6.757786   |
| FIGF     | -2.1768396 |
| FLT3     | 0.9881029  |
| FLT4     | 0.77403903 |
| FOS      | 3.824273   |
| FOXO4    | -1.2283776 |
| GADD45A  | -1.1292367 |

|          |            |
|----------|------------|
| GADD45B  | 2.3206186  |
| GADD45G  | 1.6221538  |
| GM1987   | -0.6113858 |
| GM5431   | 0.8757341  |
| GNB2     | -1.0201678 |
| GNB4     | 0.3984499  |
| GNG11    | -1.232204  |
| GNG5     | 0.55924225 |
| GNGT1    | 0.91595125 |
| GRB2     | 0.57078505 |
| GYS1     | 0.52698135 |
| HC       | 1.4255233  |
| HOMER2   | -0.6966879 |
| HRAS     | -1.0997643 |
| HSP90AB1 | 0.480062   |
| ICAM1    | 1.8541679  |
| IFNAB    | 0.87327576 |
| IFNB1    | 3.2991629  |
| IFNG     | 4.009959   |
| IGF1     | -1.54954   |
| IL10     | 4.818664   |
| IL11     | 1.1510792  |
| IL12RB1  | 1.1471801  |
| IL12RB2  | 0.814132   |
| IL15     | 0.4632604  |
| IL17A    | 5.5665903  |
| IL17RB   | 0.8611431  |
| IL18     | 2.2746024  |
| IL1A     | 3.7713513  |
| IL1B     | 2.7510228  |
| IL1R1    | 1.0408502  |
| IL1R2    | 4.3295417  |
| IL2      | 1.5557206  |
| IL22     | 4.4433956  |
| IL23A    | 2.4010181  |
| IL23R    | 2.523496   |
| IL2RA    | 3.4102883  |
| IL2RB    | 0.6914215  |
| IL2RG    | 0.9468956  |
| IL4      | -0.8587384 |
| IL5RA    | -0.9998815 |
| IL6      | 8.340477   |
| IL7      | -1.1558645 |
| IL9R     | -1.6111493 |
| INHBB    | 4.4229445  |

|         |            |
|---------|------------|
| INS1    | 3.61729    |
| INSR    | 0.9182136  |
| IRS1    | -0.9625104 |
| ITGA1   | 0.9072714  |
| ITGA2B  | -0.6590681 |
| ITGA5   | 1.221149   |
| ITGA6   | -0.7418227 |
| ITGA7   | 1.5052176  |
| ITGA8   | -3.182877  |
| ITGA9   | 1.0920768  |
| ITGAV   | 1.1375875  |
| ITGB4   | 1.1001859  |
| ITGB5   | -1.6573215 |
| ITGB7   | -1.2005386 |
| JAK1    | 0.49408388 |
| JUN     | 2.1858373  |
| KLK1B4  | 5.8837113  |
| KNG1    | 4.781083   |
| KNG2    | 3.458492   |
| KRAS    | -0.6433635 |
| LAMA1   | 0.8757317  |
| LAMA2   | -1.6241465 |
| LAMA4   | 1.1140542  |
| LAMA5   | 1.9131861  |
| LAMB1   | 0.50429535 |
| LAMC1   | 0.8236742  |
| LAMC2   | 2.28344    |
| LEPR    | 0.97858477 |
| LEPRE1  | 0.47561908 |
| LIF     | 3.0903137  |
| LPAR1   | 1.4254062  |
| LPAR2   | -1.0407782 |
| LTA     | -0.4755735 |
| MAP2K1  | 0.71687937 |
| MAP2K3  | -1.277205  |
| MAP2K6  | -2.004179  |
| MAP3K14 | 0.4784503  |
| MAP3K8  | 2.7019377  |
| MAPK12  | 0.9342098  |
| MAPK14  | -0.6682735 |
| MAPK3   | -0.8137946 |
| MASP1   | -0.6732757 |
| MASP2   | 1.121773   |
| MEFV    | 2.107893   |
| MLKL    | 1.1826153  |

|         |            |
|---------|------------|
| MMP14   | 1.9454579  |
| MMP3    | 7.3080344  |
| MMP9    | -1.0223398 |
| MPL     | -0.7391472 |
| MTOR    | 0.41482115 |
| MYB     | -0.912231  |
| MYC     | 1.5316672  |
| NAIP1   | 0.7932625  |
| NAIP2   | -0.33394   |
| NAIP6   | 0.6825099  |
| NFKB1   | 0.8645086  |
| NFKBIA  | 1.9806142  |
| NFKBIB  | 0.8955245  |
| NGF     | 0.83318853 |
| NLRC4   | 0.77970314 |
| NOD2    | 1.1433349  |
| NOS3    | 1.4926176  |
| NR4A1   | 2.020092   |
| OSM     | 0.7072575  |
| PCK1    | -2.3010292 |
| PCK2    | -1.0711257 |
| PDGFA   | 1.0516696  |
| PDGFD   | -2.2874832 |
| PF4     | -0.6455636 |
| PGAM5   | 0.63162804 |
| PHLPP1  | 1.3056169  |
| PHLPP2  | -0.8087597 |
| PIK3AP1 | 1.3694353  |
| PIK3R2  | -1.1634607 |
| PIK3R3  | -1.3433583 |
| PIK3R5  | 1.3505158  |
| PKN3    | -0.5365982 |
| PLAT    | 1.8833776  |
| PLG     | 1.7543261  |
| PLK1    | -2.0595121 |
| PLK2    | 2.4335504  |
| PLK3    | 1.0950465  |
| PLK4    | -1.8608878 |
| PPBP    | -1.4106808 |
| PPP2CB  | 0.44356966 |
| PPP2R1B | -0.7991984 |
| PPP2R2A | 0.68584967 |
| PPP2R2B | -1.7352362 |
| PPP2R5B | -1.7358146 |
| PPP2R5D | -0.3759503 |

|           |            |
|-----------|------------|
| PPP2R5E   | -0.6330669 |
| PRKAA1    | -0.5082994 |
| PRKAA2    | -1.8102326 |
| PRKAB1    | -0.9287872 |
| PRKAB2    | -0.4140329 |
| PRKAG1    | -1.1251101 |
| PRLR      | 1.3273633  |
| PSTPIP1   | -0.4295383 |
| PTEN      | 0.42120886 |
| PTGS2     | 5.0223465  |
| RAG1      | -2.954071  |
| RAG2      | -2.7891526 |
| RELA      | 0.7493038  |
| RELN      | -1.3470926 |
| RELT      | -0.6496959 |
| RIPK1     | 0.58239555 |
| RIPK2     | 0.8808031  |
| RPS6KA5   | -0.8014002 |
| RPS6KB1   | 0.59629965 |
| S1PR4     | -0.7595668 |
| SELE      | 3.2909698  |
| SERPINA1A | 0.44704485 |
| SERPINA1C | 0.42771196 |
| SERPINA1D | 0.41743422 |
| SERPINA5  | 0.87769556 |
| SERPINC1  | 0.7523091  |
| SERPINE1  | 5.208542   |
| SERPING1  | 1.2945924  |
| SGK2      | 2.6469991  |
| SKP2      | -1.069937  |
| SLC2A4    | -3.126202  |
| SMAD2     | 0.9944539  |
| SMAD3     | 0.7170725  |
| SMAD4     | 0.86426497 |
| SOCS3     | 3.7506132  |
| SOD2      | 1.9517536  |
| STAT3     | 1.5922232  |
| STK11     | -0.7740669 |
| TAB1      | -1.0941672 |
| TAB2      | -0.3283291 |
| TAB3      | -0.564723  |
| TCL1B3    | -0.570977  |
| TEK       | -1.4109261 |
| TGFB1     | -0.7102079 |
| TGFB2     | -0.7353251 |

|           |            |
|-----------|------------|
| TGFBR2    | 0.43873405 |
| THBS1     | 0.9789958  |
| THBS3     | -0.3728352 |
| THBS4     | 1.5162158  |
| THEM4     | 0.8214879  |
| TLR2      | 1.3897991  |
| TNC       | 1.3498442  |
| TNF       | 2.2247972  |
| TNFRSF11B | 1.0473626  |
| TNFRSF12A | 2.2571573  |
| TNFRSF17  | -2.119503  |
| TNFRSF18  | 1.4665303  |
| TNFRSF1A  | 0.5760875  |
| TNFRSF1B  | 1.0171871  |
| TNFRSF25  | 1.398449   |
| TNFRSF4   | 2.2342062  |
| TNFRSF8   | 0.5900984  |
| TNFRSF9   | 0.8789964  |
| TNFSF13B  | -0.4282246 |
| TNFSF15   | 2.2809033  |
| TNFSF8    | 0.99408126 |
| TNFSF9    | 2.201325   |
| TNN       | 2.6868262  |
| TNXB      | -2.413766  |
| TRAF3     | 0.8093934  |
| USP7      | -0.5949631 |
| VCAM1     | -0.6094694 |
| VEGFB     | -0.5722804 |
| VTN       | 5.4852066  |
| VWF       | -1.4709516 |
| XCL1      | -1.535325  |
| XCR1      | -2.6582115 |
| YWHAB     | -0.408134  |

**Lung\_onset**

| <b>Genes</b> | <b>log2 Fold change</b> |
|--------------|-------------------------|
| C1QA         | -2.3300638              |
| C1QB         | -2.2579298              |
| C1QBP        | -1.5704875              |
| C1QC         | -2.653265               |
| BLOC1S2      | -1.3259759              |
| C1S2         | -1.7225461              |
| C2           | -2.9133568              |
| C3           | -2.1411357              |
| C4B          | -3.180214               |
| C6           | -1.1189003              |
| C8A          | -10.873709              |
| C8B          | -10.797932              |
| C8G          | -10.054869              |
| C9           | -8.941826               |
| CD59B        | -5.008132               |
| CFB          | -2.8997488              |
| CFH          | -2.9597259              |
| CFI          | -10.457387              |
| CPB2         | -10.627819              |
| CR2          | -1.0024698              |
| F10          | -3.154902               |
| F11          | -8.651178               |
| F12          | -14.362644              |
| F13B         | -12.013451              |
| F2           | -12.908922              |
| F5           | -6.29021                |
| F7           | -4.0972776              |
| F8           | -4.597064               |
| F9           | -6.346343               |
| FAS          | 1.6066656               |
| FBXO32       | 0.72601604              |
| FGA          | -10.777                 |
| FGB          | -10.708057              |
| FGF10        | 3.5441253               |
| FGF11        | 1.8084731               |
| FGF12        | 1.1424072               |
| FGF17        | 1.1147311               |
| FGF18        | 2.1681595               |
| FGF7         | 4.182008                |
| FGFR1        | 2.2481775               |
| FGFR2        | 0.9428587               |
| FGG          | -9.45623                |
| FIGF         | 4.3744617               |



|            |            |
|------------|------------|
| FLNA       | 2.0658784  |
| FLNB       | 1.79989    |
| FLNC       | 3.781347   |
| FLT1       | 2.5088482  |
| FLT3       | 1.0449159  |
| FOS        | 4.4170623  |
| FOXO6      | 2.123439   |
| FYN        | 1.2702165  |
| GADD45A    | 1.9841809  |
| GADD45B    | 3.4639516  |
| GADD45GIP1 | -2.3421206 |
| GADD45G    | 1.5053544  |
| GM13304    | 2.4578342  |
| GM1987     | 2.910431   |
| GM5431     | 0.36816263 |
| GNB4       | 1.4175034  |
| GNB5       | 1.3854225  |
| GNG11      | 0.4208293  |
| GNG8       | 1.0619752  |
| GRAP2      | 1.6940999  |
| GSK3B      | 0.77440786 |
| GYS1       | 1.2221203  |
| HOMER3     | 0.69000983 |
| HSP90AA1   | 0.49090576 |
| HSPA1A     | 1.4282413  |
| HSPA1L     | 0.578073   |
| HSPA2      | 1.7292991  |
| HSPB1      | 5.710805   |
| ICAM1      | 3.5390153  |
| IFNA14     | 0.7726519  |
| IFNA5      | 0.5634656  |
| IFNAB      | 0.79102993 |
| IFNAR1     | 0.6276746  |
| IFNG       | 2.7526507  |
| IFNK       | 1.1500814  |
| IFNLR1     | 4.212093   |
| IGF1R      | 3.2744799  |
| IKBKE      | 0.6028137  |
| IL10       | 0.74110174 |
| IL10RB     | 1.4384971  |
| IL11       | 1.8177376  |
| IL12RB1    | 0.302567   |
| IL12RB2    | 0.8175061  |
| IL17A      | 4.3824067  |
| IL17RA     | 1.2611256  |

|          |            |
|----------|------------|
| IL18R1   | 4.4500294  |
| IL18RAP  | 4.1401324  |
| IL1B     | 4.5395837  |
| IL1R2    | 8.076264   |
| IL20RB   | 1.5086188  |
| IL21R    | 1.0383027  |
| IL22RA2  | 3.5503724  |
| IL23A    | 1.813232   |
| IL2RA    | 4.114599   |
| IL2RB    | 1.3071642  |
| IL2RG    | 1.8949919  |
| IL3RA    | 0.67282295 |
| IL4RA    | 2.6294155  |
| IL6      | 7.458927   |
| IL7      | 0.7407806  |
| INHBB    | 4.967063   |
| INPP5D   | 1.2535157  |
| IRAK4    | 0.2841568  |
| IRS2     | 1.1174812  |
| ITGA1    | 1.6040163  |
| ITGA11   | 2.1542244  |
| ITGA2    | 1.3487165  |
| ITGA3    | 2.3282404  |
| ITGA4    | 1.3670893  |
| ITGA6    | 1.8815241  |
| ITGA7    | 0.4074726  |
| ITGA8    | 3.734334   |
| ITGAV    | 0.38120747 |
| ITGB1BP1 | -0.2188277 |
| ITGB1    | 0.8095498  |
| ITGB3    | 2.7306557  |
| ITGB4    | 2.2377954  |
| ITK      | 2.0560484  |
| JUN      | 3.946128   |
| KIT      | 2.1481447  |
| KLF2     | 1.9909196  |
| LAMA2    | 2.66321    |
| LAMA4    | 2.652299   |
| LAMA5    | 3.2739367  |
| LAMB1    | 1.8184557  |
| LAMB2    | 2.1300597  |
| LAMC1    | 1.6540756  |
| LAMC2    | 6.78693    |
| LAMC3    | 1.844254   |
| LAT      | 1.1295719  |

|          |            |
|----------|------------|
| LCP2     | 1.6838231  |
| LPAR1    | 4.0328197  |
| LPAR2    | 0.20749211 |
| LPAR3    | 4.1419363  |
| LTA      | 0.83822846 |
| LTB      | 2.2415051  |
| LYN      | 1.4088578  |
| MALT1    | 2.5987668  |
| MAP3K1   | 0.57268906 |
| MAP3K3   | 1.0121245  |
| MAP3K6   | 4.716194   |
| MAP3K7   | 0.419446   |
| MAP3K8   | 2.4953523  |
| MAP4K1   | 1.2381611  |
| MAP4K3   | 0.24417543 |
| MAP4K4   | 1.2343116  |
| MAPK10   | 2.2444887  |
| MAPK11   | 1.7025175  |
| MAPK12   | 0.99682283 |
| MAPK13   | 3.3856153  |
| MAPK7    | 1.02703    |
| MAPK8IP1 | 0.61370754 |
| MAPK8IP3 | 0.61066055 |
| MAPKAPK2 | 1.0024791  |
| MAPKAPK3 | 1.8800907  |
| MAPT     | 4.257713   |
| MAX      | 0.619256   |
| MCL1     | 0.9923358  |
| MEF2C    | 0.9999995  |
| MEFV     | 3.3240447  |
| MMP3     | 5.170152   |
| MMP9     | 5.527232   |
| MPL      | 1.104034   |
| MYB      | 2.716485   |
| MYC      | 1.8706264  |
| MYD88    | 1.5814781  |
| NAIP6    | 0.49379778 |
| NCK1     | 0.52710867 |
| NCK2     | 0.86701965 |
| NFATC1   | 1.5677791  |
| NFATC2   | 0.8250365  |
| NFATC3   | 0.40435958 |
| NFKB1    | 1.745542   |
| NFKBIA   | 3.0278368  |
| NFKBIE   | 2.292398   |

|         |            |
|---------|------------|
| NLK     | 0.37855434 |
| NLRC4   | 2.236875   |
| NLRP1A  | 0.43206072 |
| NOD2    | 4.366301   |
| NR4A1   | 3.3831625  |
| NRAS    | 1.3413324  |
| NTF5    | 0.87815    |
| NTRK2   | 0.9203265  |
| OSM     | 3.7199185  |
| PAK2    | 0.6441016  |
| PCK2    | 0.4853809  |
| PDCD1   | 1.7823114  |
| PDGFA   | 1.8793483  |
| PDGFB   | 3.2462788  |
| PDGFD   | 1.2010536  |
| PDGFRB  | 0.74780893 |
| PF4     | 2.363049   |
| PHLPP2  | 0.6950011  |
| PIAS1   | 0.508173   |
| PIK3AP1 | 1.2819929  |
| PIK3CD  | 0.7616577  |
| PIK3R3  | 1.6068354  |
| PIK3R5  | 2.3862696  |
| PIM1    | 3.0797358  |
| PKN2    | 0.58896446 |
| PKN3    | 0.526752   |
| PLA2G4A | 0.91808605 |
| PLA2G4F | 1.3484056  |
| PLAU    | 2.0492165  |
| PLCG2   | 1.2643476  |
| PLK2    | 0.94822836 |
| PPBP    | 2.395474   |
| PPP2CB  | 0.7925134  |
| PPP2R2A | 0.87358665 |
| PPP2R2B | 0.96282077 |
| PPP2R2C | 1.4879966  |
| PPP2R5B | 0.71786594 |
| PPP3CA  | 0.71466446 |
| PPP3CB  | 0.18939066 |
| PPP3CC  | 0.9277544  |
| PPP3R1  | 0.47904205 |
| PRKAA1  | 0.7285137  |
| PRKAB2  | 1.0894008  |
| PRKCA   | 1.277164   |
| PRKCB   | 0.91753864 |

|         |            |
|---------|------------|
| PRKCQ   | 1.2901917  |
| PRKX    | 1.8347335  |
| PRMT10  | -0.87988   |
| PRMT1   | 0.16884708 |
| PSTPIP1 | 1.2061639  |
| PTGS2   | 6.2398024  |
| PTK2    | 0.57645607 |
| PTPN11  | 0.5402045  |
| PTPN6   | 0.86703825 |
| PTPRC   | 2.0226564  |
| PXN     | 1.3634577  |
| PYCARD  | 1.3426914  |
| RAC2    | 1.3986683  |
| RAC3    | 1.7256742  |
| RAP1A   | 0.5527749  |
| RAP1B   | 1.5412989  |
| RAPGEF2 | 0.25174904 |
| RASA1   | 0.36730003 |
| RASA2   | 2.259202   |
| RASGRF1 | 0.6192608  |
| RASGRP1 | 1.2764997  |
| RASGRP4 | 2.1191669  |
| RELA    | 0.9156637  |
| RELB    | 2.6883588  |
| RELT    | 1.4378161  |
| RIPK1   | 0.45142078 |
| RIPK2   | 2.995835   |
| RPS6KA2 | 2.1252697  |
| RPS6KA3 | 2.0062404  |
| RPS6KA4 | 0.18949413 |
| RPS6KA5 | 0.5891967  |
| RPS6KA6 | 0.3327148  |
| RRAS2   | 0.42335367 |
| S1PR1   | 2.113883   |
| S1PR4   | 2.4199169  |
| SAMD4B  | 1.0625854  |
| SELE    | 5.229238   |
| SETD7   | 1.1421766  |
| SGK1    | 1.0630302  |
| SH2D2A  | 1.3051696  |
| SIRT1   | 0.8584819  |
| SMAD3   | 0.7149377  |
| SMAD4   | 0.5806265  |
| SOCS1   | 1.656045   |
| SOCS2   | 2.016519   |

|           |            |
|-----------|------------|
| SOCS3     | 3.4395528  |
| SOCS4     | 0.82553387 |
| SOCS5     | 1.4294734  |
| SOCS7     | 0.9182911  |
| SOS2      | 0.60000134 |
| SPHK1     | 7.3345294  |
| SPRED1    | 1.5664315  |
| SPRY2     | 1.8779514  |
| SPRY4     | 0.5404625  |
| SRF       | 0.52607775 |
| STAM      | 0.46688318 |
| STAT1     | 0.62836695 |
| STAT3     | 0.8424425  |
| STK3      | 0.7081084  |
| STK4      | 1.0910583  |
| TAB2      | 0.34160948 |
| TBK1      | 1.1977406  |
| TEK       | 0.8382416  |
| TGFB1     | 0.4125886  |
| TGFB2     | 4.083831   |
| TGFB3     | 2.2638679  |
| TGFBR1    | 0.7626753  |
| TGFBR2    | 1.3231001  |
| THBS1     | 6.1650934  |
| THBS3     | 4.5941486  |
| THBS4     | 1.3332331  |
| TLR2      | 2.857677   |
| TLR4      | 1.987256   |
| TLR6      | 1.3309684  |
| TNF       | 4.154597   |
| TNFRSF11A | 0.8791108  |
| TNFRSF12A | 1.0839624  |
| TNFRSF13C | 2.3890948  |
| TNFRSF18  | 1.8865471  |
| TNFRSF1B  | 1.2936821  |
| TNFRSF21  | 1.1518412  |
| TNFRSF25  | 1.9870076  |
| TNFRSF4   | 1.2138343  |
| TNFSF10   | 2.2230396  |
| TNFSF13B  | 3.1026287  |
| TNFSF14   | 2.7104964  |
| TNFSF15   | 3.6604176  |
| TNFSF8    | 0.5036111  |
| TNFSF9    | 4.6423254  |
| TNN       | 4.314877   |

|       |            |
|-------|------------|
| TNXB  | 0.7817874  |
| TRAF2 | 0.50108004 |
| TRAF3 | 0.8752098  |
| TRAF6 | 0.8738661  |
| TSLP  | 4.0877614  |
| VAV1  | 1.5279889  |
| VAV3  | 0.76574135 |
| VCAM1 | 2.0893917  |
| VEGFA | 1.8181062  |
| VWF   | 3.0755148  |
| XCL1  | 1.8451285  |
| YWHAH | 0.7903938  |
| ZAK   | 2.565467   |

**Lung\_late**

| <b>Gene</b> | <b>Log2 Fold Change</b> |
|-------------|-------------------------|
| ZAK         | 2.0452528               |
| WAS         | 0.74765587              |
| VWF         | 1.6854692               |
| VEGFA       | 1.2638874               |
| VCAN        | 2.3611517               |
| VCAM1       | 0.64147043              |
| VAV3        | 0.82796955              |
| VAV1        | 1.6077347               |
| USP7        | 0.26909256              |
| TSLP        | 2.9447913               |
| TRAF6       | 0.5436778               |
| TRAF3       | 0.5675473               |
| TNN         | 2.4856093               |
| TNFSF9      | 4.410564                |
| TNFSF8      | 0.7684989               |
| TNFSF15     | 2.6855485               |
| TNFSF14     | 1.8618245               |
| TNFSF13B    | 2.3018198               |
| TNFSF11     | 1.3256779               |
| TNFRSF4     | 1.4969172               |
| TNFRSF25    | 0.9008632               |
| TNFRSF21    | 1.1721253               |
| TNFRSF1B    | 1.5765085               |
| TNFRSF18    | 2.324698                |
| TNFRSF17    | 0.28229785              |
| TNFRSF13C   | 2.9831812               |
| TNFRSF12A   | 1.8393402               |
| TNFRSF11A   | 0.9960127               |
| TNFRSF10B   | 2.8815746               |
| TNF         | 3.7834496               |
| TNC         | 1.4975402               |
| TLR6        | 1.0308485               |
| TLR4        | 1.5636492               |
| TLR2        | 1.6774573               |
| TIGIT       | 3.6209788               |
| TIAM1       | 1.2450492               |
| THBS4       | 3.7257855               |
| THBS3       | 2.6157742               |
| THBS1       | 6.55743                 |
| TGFB2       | 1.6033506               |
| TGFB1       | 0.98875713              |
| TGFB3       | 1.7257748               |
| TGFB2       | 2.7732306               |



|         |            |
|---------|------------|
| TEK     | 0.15780067 |
| TBK1    | 1.2851996  |
| TAB3    | 0.44628    |
| STK4    | 0.9083972  |
| STK3    | 0.58242655 |
| STAT3   | 1.1934619  |
| STAT1   | 0.37354946 |
| STAM2   | 1.0407138  |
| STAM    | 0.6151786  |
| SRF     | 0.5676975  |
| SPRY2   | 2.1336806  |
| SPRED1  | 1.4605398  |
| SPP1    | 0.15917444 |
| SPN     | 1.527298   |
| SPHK1   | 8.527199   |
| SOS2    | 0.4980402  |
| SOCS7   | 0.657146   |
| SOCS5   | 0.782423   |
| SOCS4   | 0.41125202 |
| SOCS3   | 4.0248637  |
| SOCS2   | 2.1204147  |
| SOCS1   | 1.6230025  |
| SMAD4   | 0.58476496 |
| SMAD3   | 1.1446466  |
| SIRT1   | 0.48348427 |
| SHC4    | 0.5642314  |
| SH2D2A  | 0.5522232  |
| SGK1    | 1.2314005  |
| SETD7   | 0.637825   |
| SELPLG  | 1.3456335  |
| SELP    | 6.1561007  |
| SELL    | 2.9601846  |
| SELE    | 6.237152   |
| SDC4    | 0.3266015  |
| SAMD4B  | 0.8918271  |
| S1PR4   | 1.9378417  |
| S1PR1   | 2.0484815  |
| RPS6KB1 | 0.62437916 |
| RPS6KA4 | 0.37386465 |
| RPS6KA3 | 1.7599187  |
| RPS6KA2 | 2.210785   |
| ROCK2   | 1.7911196  |
| ROCK1   | 0.77979517 |
| RIPK2   | 2.5903394  |
| RIPK1   | 0.6664424  |

|         |            |
|---------|------------|
| RHOA    | 0.26532316 |
| RELT    | 1.0461106  |
| RELB    | 2.1321206  |
| RELA    | 0.74139357 |
| RASGRP4 | 0.83943987 |
| RASA2   | 2.1330843  |
| RAP1B   | 1.1863432  |
| RAP1A   | 0.5900388  |
| RAC3    | 1.7309184  |
| RAC2    | 1.1675053  |
| PYCARD  | 1.8572445  |
| PXN     | 1.6619797  |
| PVR     | 3.8597398  |
| PTPRC   | 1.2305136  |
| PTPN11  | 0.5375447  |
| PTGS2   | 6.7818155  |
| PSTPIP1 | 1.361382   |
| PRMT1   | 0.5083232  |
| PRKX    | 1.2815495  |
| PRKCQ   | 0.7634604  |
| PRKCD   | 1.2187867  |
| PRKCB   | 0.74161196 |
| PRKCA   | 0.4711795  |
| PRKAB2  | 0.2856145  |
| PREX1   | 0.2893648  |
| PPP3CC  | 0.86762524 |
| PPP2R5B | 0.4674859  |
| PPP2R2A | 0.81175995 |
| PPP2CB  | 0.6208973  |
| PPBP    | 0.46439886 |
| PLK2    | 0.9400983  |
| PLD2    | 0.39085293 |
| PLCG2   | 1.0147638  |
| PLCB3   | 0.46345425 |
| PLCB2   | 0.69713664 |
| PLAU    | 2.147454   |
| PLA2G4F | 1.554033   |
| PLA2G4D | 2.237095   |
| PLA2G4A | 0.64863205 |
| PKN2    | 0.5005865  |
| PIM1    | 2.7136235  |
| PIK3R5  | 2.1143775  |
| PIK3R3  | 1.2640414  |
| PIK3CD  | 0.48172235 |
| PIK3AP1 | 1.1570759  |

|          |            |
|----------|------------|
| PIAS3    | 0.37434602 |
| PIAS1    | 0.24144077 |
| PHLPP2   | 0.48183107 |
| PGF      | 1.2085481  |
| PF4      | 2.13722    |
| PECAM1   | 1.8081269  |
| PDGFRB   | 0.36302376 |
| PDGFB    | 1.9077516  |
| PDGFA    | 1.9476962  |
| PDCD1LG2 | 1.3529508  |
| PDCD1    | 2.3510494  |
| PCK2     | 0.5455899  |
| PAK2     | 0.61969376 |
| OSMR     | 3.8426318  |
| OSM      | 4.328584   |
| NTRK2    | 2.9319053  |
| NTNG2    | 4.066696   |
| NTF5     | 0.36728215 |
| NRCAM    | 5.0544844  |
| NRAS     | 1.1408324  |
| NR4A1    | 4.7932887  |
| NOS3     | 1.4072819  |
| NOD2     | 3.350358   |
| NLRC4    | 1.1881046  |
| NLK      | 0.14549065 |
| NLGN3    | 0.5977442  |
| NFKBIE   | 1.3137097  |
| NFKBIA   | 2.9988866  |
| NFKB1    | 1.6841941  |
| NFATC1   | 1.2170839  |
| NFASC    | 2.6087308  |
| NEO1     | 0.51161957 |
| NCK2     | 0.7011013  |
| NCF1     | 1.8025889  |
| NAIP6    | 0.5756221  |
| NAIP1    | 0.24072242 |
| MYD88    | 1.457026   |
| MYC      | 2.0321965  |
| MYB      | 2.397955   |
| MPZL1    | 1.042315   |
| MMP9     | 4.664946   |
| MMP3     | 7.348541   |
| MMP2     | 3.345994   |
| MMP14    | 0.4488573  |
| MLKL     | 0.69699097 |

|          |            |
|----------|------------|
| MEFV     | 2.315154   |
| MEF2C    | 1.0044878  |
| MDM2     | 0.17502022 |
| MCL1     | 0.93355083 |
| MBL2     | -6.813462  |
| MBL1     | -4.603528  |
| MASP2    | -5.6172276 |
| MASP1    | -5.5993795 |
| MAPT     | 2.2219925  |
| MAPKAPK3 | 2.081365   |
| MAPK7    | 1.1563973  |
| MAPK13   | 4.022091   |
| MAPK12   | 0.49197865 |
| MAPK11   | 0.7786231  |
| MAPK10   | 2.7744236  |
| MAP4K4   | 1.939044   |
| MAP4K1   | 1.508429   |
| MAP3K8   | 2.512198   |
| MAP3K7CL | -2.8347774 |
| MAP3K7   | 0.28575993 |
| MAP3K6   | 5.0145845  |
| MAP3K3   | 0.88606405 |
| MAP3K14  | 0.8995886  |
| MAP3K1   | 0.66468716 |
| MAP2K1   | 0.50737953 |
| MALT1    | 2.6805763  |
| MAG      | 0.8002918  |
| MADCAM1  | 2.069503   |
| LYN      | 0.65457535 |
| CLTB     | 0.71789885 |
| LTB      | 0.5080843  |
| LRRC4B   | 2.7860303  |
| LRRC4    | 0.26604223 |
| LPAR3    | 3.6523204  |
| LPAR1    | 3.6387627  |
| LIF      | 1.1804101  |
| LCP2     | 0.49703765 |
| LAMC3    | 0.75221515 |
| LAMC2    | 7.762702   |
| LAMC1    | 1.3958383  |
| LAMB2    | 1.4057393  |
| LAMB1    | 1.2940497  |
| LAMA5    | 2.9092116  |
| LAMA4    | 2.3137937  |
| LAMA2    | 0.6962223  |

|        |            |
|--------|------------|
| L1CAM  | 1.1483574  |
| KRAS   | 0.45829868 |
| KNG2   | -4.413828  |
| KNG1   | -3.3913126 |
| KLKB1  | -8.030532  |
| KLF2   | 1.6643157  |
| KITL   | 5.24218    |
| KIT    | 1.4887748  |
| JUND   | 0.58947563 |
| JUNB   | 2.8101377  |
| JUN    | 3.9256206  |
| JAM3   | 1.382802   |
| JAM2   | 0.5825348  |
| ITPR3  | 1.8189054  |
| ITK    | 1.4300728  |
| ITGB8  | 1.323009   |
| ITGB4  | 2.5462008  |
| ITGB3  | 3.0878954  |
| ITGB2L | 3.9498715  |
| ITGB2  | 0.9821358  |
| ITGB1  | 0.5748148  |
| ITGAV  | 0.6529298  |
| ITGAM  | 1.5239978  |
| ITGA7  | 1.3154354  |
| ITGA6  | 2.045701   |
| ITGA4  | 1.3683     |
| ITGA3  | 2.4683657  |
| ITGA2B | 1.1161757  |
| ITGA2  | 0.6890826  |
| ITGA11 | 1.4552181  |
| ITGA1  | 0.9506445  |
| IRS2   | 1.7258911  |
| IRF7   | 0.1748352  |
| INPP5D | 1.6885242  |
| INHBB  | 6.695317   |
| IL7R   | 5.643655   |
| IL6ST  | 0.54155016 |
| IL6    | 9.970649   |
| IL4RA  | 2.5053735  |
| IL3RA  | 0.44489384 |
| IL2RG  | 1.2892513  |
| IL2RB  | 1.0919466  |
| IL2RA  | 4.819016   |
| IL23R  | 0.9036491  |
| IL23A  | 2.3482237  |

|         |            |
|---------|------------|
| IL22RA2 | 2.5328484  |
| IL22    | 0.78087616 |
| IL21R   | 0.97877145 |
| IL20RB  | 1.5779648  |
| IL1R2   | 7.9986944  |
| IL1B    | 3.7900834  |
| IL1A    | 1.5567865  |
| IL18RAP | 3.772426   |
| IL18R1  | 3.4209142  |
| IL17RA  | 2.0093846  |
| IL17A   | 4.654379   |
| IL12RB2 | 0.6264956  |
| IL11    | 5.247109   |
| IL10RB  | 1.1920409  |
| IL10RA  | 0.26600552 |
| IL10    | 3.2818475  |
| IKBKE   | 0.77524424 |
| IGF1R   | 2.8095655  |
| IFNLR1  | 3.0288448  |
| IFNGR1  | 0.77543116 |
| IFNG    | 4.575471   |
| IFNAB   | 0.97302294 |
| IFNA5   | 0.87249565 |
| IFNA14  | 0.5930052  |
| IFNA1   | 0.16362357 |
| ICOSL   | 2.3906593  |
| ICAM2   | 1.327426   |
| ICAM1   | 3.3403993  |
| HSPB1   | 6.246183   |
| HSPA2   | 1.5885916  |
| HOMER3  | 0.8972025  |
| HCK     | 1.4818735  |
| HC      | -1.5593138 |
| HBEGF   | 4.1092362  |
| H2-T24  | 2.0622087  |
| GYS1    | 1.7983017  |
| GSK3B   | 0.46723032 |
| GRK5    | 2.5780983  |
| GRK4    | 0.77311635 |
| GRAP2   | 0.79058003 |
| GNB5    | 1.4316125  |
| GNB4    | 0.92256165 |
| GNAQ    | 0.7829528  |
| GNAI1   | 1.9498744  |
| GM1987  | 1.9489446  |

|         |            |
|---------|------------|
| GM13304 | 1.7035847  |
| GLYCAM1 | 4.344466   |
| GLG1    | 0.61619425 |
| GADD45G | 1.7044864  |
| GADD45B | 3.2173328  |
| GADD45A | 0.70815134 |
| FYN     | 1.2369471  |
| FOXO6   | 1.7624094  |
| FOS     | 5.324674   |
| FLT3    | 1.539484   |
| FLT1    | 2.2755814  |
| FLNC    | 4.7369657  |
| FLNB    | 0.73902273 |
| FLNA    | 1.6838555  |
| FIGF    | 0.7428055  |
| FGR     | 0.92225504 |
| FGG     | -1.2742682 |
| FGFR2   | 0.42812538 |
| FGFR1   | 2.98215    |
| FGF7    | 4.857344   |
| FGF6    | 0.5836663  |
| FGF2    | 0.1971159  |
| FGF18   | 0.68637276 |
| FGF11   | 0.7123091  |
| FGF10   | 3.1837902  |
| FGB     | -1.5195751 |
| FGA     | -1.4732561 |
| FBXO32  | 2.2857213  |
| FASL    | 0.7055867  |
| FAS     | 0.19836473 |
| F9      | -4.541     |
| F8      | -5.1338806 |
| F7      | -3.2881508 |
| F5      | -5.6914816 |
| F2R     | 2.1768146  |
| F2      | -4.4143066 |
| F13B    | -7.733657  |
| F12     | -5.388242  |
| F11     | -5.1155505 |
| F10     | -3.0428324 |
| ESAM    | 2.456534   |
| ERBB2IP | 0.5935888  |
| EPHA2   | 0.57496643 |
| EP300   | 0.40212202 |
| ELK4    | 1.2293129  |

|         |            |
|---------|------------|
| EFNA4   | 1.2684247  |
| EDN1    | 4.9202104  |
| DUSP8   | 3.2829816  |
| DUSP7   | 1.2820086  |
| DUSP5   | 2.79953    |
| DUSP4   | 3.2240245  |
| DUSP2   | 3.9149075  |
| DUSP16  | 1.2796755  |
| DUSP1   | 3.857088   |
| DOCK2   | 1.1569562  |
| DDIT4   | 2.108601   |
| DDIT3   | 1.18191    |
| DAPP1   | 1.9813213  |
| CXCR5   | 2.146194   |
| CXCR4   | 2.9280877  |
| CXCR2   | 2.995656   |
| CXCR1   | 3.6259289  |
| CXCL5   | 9.573448   |
| CXCL3   | 6.8541846  |
| CXCL2   | 8.005163   |
| CXCL16  | 1.6186166  |
| CXCL15  | 8.608767   |
| CXCL14  | 7.74806    |
| CXCL13  | 1.6614156  |
| CXCL10  | 2.8854737  |
| CXCL1   | 4.8407164  |
| CX3CR1  | 0.9450669  |
| CX3CL1  | 4.4861307  |
| CTSK    | 4.3999357  |
| CSNK1E  | 1.5740066  |
| CSF3    | 8.046267   |
| CSF2RB2 | 0.95553493 |
| CSF2RB  | 1.2450933  |
| CSF2RA  | 1.3021107  |
| CSF2    | 5.5412235  |
| CSF1    | 1.0551028  |
| CRLF2   | 0.6269026  |
| CRK     | 0.74908686 |
| CREB3L2 | 0.6686063  |
| CREB3L1 | 2.7341866  |
| CREB3   | 0.23549366 |
| CREB1   | 0.953758   |
| CR2     | -0.8204019 |
| CPB2    | -2.886948  |
| COMP    | 1.6020968  |



|        |            |
|--------|------------|
| COL6A2 | 1.3582196  |
| COL6A1 | 2.4246302  |
| COL5A2 | 0.65350795 |
| COL4A6 | 0.99782467 |
| COL4A4 | 1.5852437  |
| COL4A3 | 3.5774088  |
| COL4A2 | 3.1843548  |
| COL4A1 | 3.485456   |
| COL1A2 | 0.92870426 |
| COL1A1 | 0.8451123  |
| CLDN8  | 0.6912329  |
| CLDN5  | 4.118408   |
| CLDN4  | 0.88523173 |
| CLDN22 | 3.7501366  |
| CLDN18 | 1.3436415  |
| CLDN10 | 5.7931757  |
| CISH   | 1.7294979  |
| CHRM2  | 3.0229192  |
| CHAD   | 4.531857   |
| CFI    | -5.2741585 |
| CFH    | -2.351603  |
| CFB    | -1.7198343 |
| CEBPB  | 0.39219904 |
| CDKN2D | 1.6419034  |
| CDKN2B | 5.3669114  |
| CDK2   | 0.14747453 |
| CDH5   | 2.4326844  |
| CDH15  | 2.198609   |
| CDH1   | 1.7390733  |
| CDC25B | 1.4985504  |
| CD8B1  | 1.2814999  |
| CD80   | 0.8098655  |
| CD79B  | 1.3902636  |
| CD79A  | 1.8077974  |
| CD72   | 0.28123522 |
| CD70   | 1.0856862  |
| CD6    | 1.4332328  |
| CD59B  | -4.3090315 |
| CD40   | 2.668353   |
| CD3G   | 0.23918581 |
| CD3D   | 0.7945304  |
| CD34   | 3.710321   |
| CD274  | 2.644576   |
| CD2    | 1.8432856  |
| CD19   | 2.063467   |

|          |            |
|----------|------------|
| CD14     | 3.3234658  |
| CCR8     | 1.2829981  |
| CCR7     | 5.3706584  |
| CCR1L1   | 0.67022014 |
| CCR10    | 0.8565016  |
| CCNG2    | 0.35839343 |
| CCND2    | 2.3981524  |
| CCL8     | 1.6231565  |
| CCL7     | 4.9070687  |
| CCL6     | 1.2765617  |
| CCL5     | 1.4234304  |
| CCL4     | 5.2205024  |
| CCL3     | 6.53883    |
| CCL2     | 4.757485   |
| CCL17    | 8.273239   |
| CCL12    | 3.6947422  |
| CCL11    | 5.5829077  |
| CBLB     | 1.9600844  |
| CBL      | 2.7272897  |
| CASP1    | 0.5162144  |
| CARD11   | 1.2655902  |
| CAMK2D   | 1.714241   |
| CAMK2B   | 0.19525313 |
| CALML3   | 4.139661   |
| CALM4    | 4.4943476  |
| CALM1    | 0.3385439  |
| CACNB3   | 1.6161375  |
| CACNB1   | 0.45416355 |
| CACNA2D4 | 1.4144635  |
| CACNA2D2 | 0.56573534 |
| CACNA2D1 | 3.4146247  |
| CACNA1S  | 1.910387   |
| CACNA1D  | 2.0253427  |
| CACNA1C  | 3.2129717  |
| C9       | -7.750138  |
| C8G      | -7.08279   |
| C8B      | -4.738978  |
| C8A      | -5.108748  |
| C6       | -1.2727351 |
| C4BP     | -4.9429207 |
| C4B      | -2.8549414 |
| C3       | -1.4945536 |
| C2       | -2.3774672 |
| C1S2     | -1.1009212 |
| C1QC     | -2.555378  |

|       |            |
|-------|------------|
| C1QB  | -2.2561574 |
| C1QA  | -2.404663  |
| BTK   | 1.0940089  |
| BRAF  | 0.95715284 |
| BMPR2 | 3.249743   |
| BLNK  | 2.9537716  |
| BIRC3 | 3.071001   |
| BCL6  | 1.4016328  |

Liver\_onset

| <b>Genes</b> | <b>Log2 Fold Change</b> |
|--------------|-------------------------|
| APAF1        | 2.1144776               |
| ARF6         | 1.8438458               |
| ARPC1A       | 0.9504733               |
| ARPC1B       | 1.9371085               |
| ARPC3        | 1.2726064               |
| ARPC4        | 1.4588189               |
| ARPC5        | 0.98877144              |
| ASAP3        | 1.3654456               |
| ATF2         | 1.1681762               |
| ATF4         | 2.428388                |
| ATG12        | 1.2063689               |
| AZI2         | 1.879756                |
| B2M          | 1.5585384               |
| BAD          | 0.8827567               |
| BAX          | 2.3578677               |
| BCL10        | 2.5660462               |
| BCL2A1C      | 3.2369423               |
| BCL2A1D      | 2.7446132               |
| BCL2L1       | 2.414969                |
| BCL2L13      | 0.9952736               |
| BCL3         | 4.8442125               |
| BID          | 2.9501457               |
| BIRC3        | 2.724102                |
| CALR         | 2.4570813               |
| CANX         | 1.7151651               |
| CASP1        | 1.507772                |
| CASP6        | 1.276854                |
| CASP7        | 1.927382                |
| CCL2         | 6.036657                |
| CCL3         | 5.719592                |
| CCL4         | 4.430876                |
| CCL5         | 1.3589654               |
| CD14         | 6.529488                |
| CD40         | 2.4682698               |
| CD74         | 1.5408154               |
| CD86         | 1.2704403               |
| CCDC42       | -2.2314446              |
| CDC42        | 1.3695054               |
| CEBPB        | 3.3846107               |
| CFL1         | 1.4677305               |
| CFL2         | 1.5052915               |
| CREB5        | 1.9641981               |
| CRK          | 1.9467292               |

|          |            |
|----------|------------|
| CSF1     | 2.8987136  |
| CSF2RB   | 2.5957346  |
| CSNK2A2  | 1.3440485  |
| CTSB     | 2.2591586  |
| CTSS     | 0.83475494 |
| CXCL1    | 5.365581   |
| CXCL2    | 8.263842   |
| CXCL3    | 3.6419559  |
| CXCL9    | 4.479806   |
| DDX3X    | 1.835401   |
| DDX58    | 1.7575588  |
| DFFB     | 1.1254168  |
| DHX58    | 1.6179304  |
| DNM1L    | 1.2193375  |
| DNM2     | 1.6740384  |
| ERBB2IP  | 1.1416659  |
| FAS      | 3.616722   |
| FCGR2B   | 2.481648   |
| GADD45B  | 2.7043138  |
| H2-AA    | 1.5925322  |
| H2-AB1   | 1.0541954  |
| H2-D1    | 1.4035072  |
| H2-EB1   | 0.90928745 |
| H2-K1    | 1.8576622  |
| H2-M2    | 1.654685   |
| H2-Q2    | 2.0738263  |
| H2-Q7    | 1.9920216  |
| H2-Q8    | 1.8150468  |
| H2-T23   | 1.8448248  |
| HCK      | 1.7694583  |
| HSP90AA1 | 1.747529   |
| HSP90AB1 | 1.5677366  |
| HSPA1A   | 3.709042   |
| HSPA2    | 1.3318233  |
| HSPA4    | 2.062583   |
| HSPA5    | 2.98735    |
| HSPA8    | 2.1307163  |
| ICAM1    | 2.3301744  |
| IFIH1    | 1.9949088  |
| IFNAR1   | 2.0860157  |
| IFNAR2   | 2.5267382  |
| IFNG     | 2.190075   |
| IKBKB    | 1.7780247  |
| IKBKE    | 4.272011   |
| IL1B     | 4.750852   |

|         |            |
|---------|------------|
| IL6     | 7.8417587  |
| IRAK1   | 0.77092505 |
| IRAK2   | 1.3855486  |
| IRAK3   | 4.8203144  |
| IRAK4   | 1.4310675  |
| IRF3    | 2.042357   |
| IRF7    | 1.5674634  |
| ISG15   | 3.6198869  |
| JUN     | 1.8008885  |
| LTB     | 1.9147286  |
| LYN     | 2.408308   |
| MALT1   | 2.6235409  |
| MAP2K1  | 2.3460078  |
| MAP2K3  | 1.9981256  |
| MAP3K1  | 1.5065665  |
| MAP3K5  | 1.4613299  |
| MAP3K7  | 1.6863675  |
| MAP3K8  | 3.7303     |
| MAPK14  | 1.3038864  |
| MAPK9   | 0.9723015  |
| MARCKS  | 1.6384606  |
| MEFV    | 4.6734195  |
| MMP9    | 2.8503413  |
| MYD88   | 3.268651   |
| NAIP2   | 1.3266621  |
| NAIP5   | 2.4703164  |
| NCF1    | 2.6594706  |
| NFKBIA  | 3.3306222  |
| NFKBIB  | 3.4757843  |
| NFYA    | 1.7913761  |
| NFYB    | 2.2752237  |
| NLRC4   | 1.9987414  |
| OTUD5   | 1.7813206  |
| PARP1   | 1.3216214  |
| PGAM5   | 1.6612492  |
| PIAS4   | 1.1725798  |
| PIK3CB  | 0.740613   |
| PIK3R1  | 0.9566884  |
| PIK3R5  | 2.5419044  |
| PIN1    | 1.5322361  |
| PIP5K1A | 6.4570208  |
| PLA2G4A | 1.3903532  |
| PLD1    | 1.0436683  |
| PPP3CB  | 0.8888669  |
| PPP3R1  | 1.1859093  |

|          |           |
|----------|-----------|
| PRKACB   | 1.1820965 |
| PRKCB    | 1.3298774 |
| PRKCD    | 1.6032434 |
| PSME1    | 1.9823742 |
| PSME3    | 1.9212136 |
| PTGS2    | 3.1314769 |
| PTPRC    | 1.4612212 |
| RAC2     | 1.9911137 |
| RELA     | 2.522079  |
| RELB     | 2.0631094 |
| RFXAP    | 1.4446907 |
| RIPK1    | 2.824726  |
| RNF125   | 3.695417  |
| RPS6KB1  | 1.4120283 |
| SIKE1    | 0.9595876 |
| SOCS3    | 4.8660665 |
| SPP1     | 1.5827289 |
| SUGT1    | 1.5401044 |
| TAB2     | 1.2883873 |
| TAB3     | 1.3730497 |
| TANK     | 2.3361912 |
| TAP1     | 2.2094197 |
| TAP2     | 2.521069  |
| TAPBP    | 2.0654993 |
| TBK1     | 2.9431362 |
| TLR2     | 4.3165045 |
| TLR3     | 1.1375089 |
| TLR6     | 2.3953714 |
| TMEM173  | 2.2276697 |
| TNF      | 5.8694487 |
| TNFRSF1A | 2.1380758 |
| TNFRSF1B | 1.6970997 |
| TNFSF14  | 1.6440063 |
| TOLLIP   | 1.3194857 |
| TRADD    | 1.3656964 |
| TRAF2    | 2.5938106 |
| TRAF3    | 1.5550995 |
| TRAF6    | 1.6272502 |
| TRIM25   | 1.6859136 |
| TRIP6    | 1.8839488 |
| UBE2I    | 0.9876461 |
| VASP     | 2.3511057 |
| VAV1     | 1.7400427 |
| VCAM1    | 3.0385032 |

**Liver\_late**

| <b>Genes</b> | <b>Log2Fold Change</b> |
|--------------|------------------------|
| C1QA         | 2.0641377              |
| C1QB         | 1.9021208              |
| C1QC         | 1.609268               |
| C1S2         | 2.8937666              |
| C2           | 4.0796986              |
| C3           | 3.7652035              |
| C4B          | 4.2947817              |
| C8A          | 4.7938757              |
| C8B          | 5.4072266              |
| C8G          | 5.0531435              |
| C9           | 4.912554               |
| CADM1        | -1.0697734             |
| CADM3        | -1.4279401             |
| CD2          | -1.9864731             |
| CD34         | -2.798125              |
| CD40LG       | -3.7962584             |
| CD6          | -0.8451831             |
| CD8A         | -1.6508737             |
| CD8B1        | -1.087054              |
| CDH1         | -2.5712314             |
| CDH5         | -0.630861              |
| CFB          | 5.9501534              |
| CFH          | 4.549362               |
| CFI          | 9.88666                |
| CLDN13       | -4.071478              |
| CLDN15       | -3.1823359             |
| CLDN16       | -4.2633886             |
| CLDN17       | -3.3157594             |
| CLDN18       | -5.17022               |
| CLDN20       | -1.3730004             |
| CLDN4        | -2.84872               |
| CLDN5        | -5.718268              |
| CLDN6        | -3.348473              |
| CLDN8        | -2.7479033             |
| CLDN9        | -3.4963312             |
| CNTN2        | -1.9606357             |
| CPB2         | 10.885954              |
| CR1L         | 1.6542985              |
| DAF2         | 1.7736428              |
| ESAM         | -0.7831013             |
| F10          | 6.367607               |
| F11          | 8.4922495              |
| F12          | 12.398761              |



|         |            |
|---------|------------|
| F13B    | 9.064068   |
| F2      | 10.92795   |
| F5      | 4.538271   |
| F7      | 3.4095504  |
| F9      | 3.6609108  |
| FGA     | 9.173074   |
| FGB     | 9.663299   |
| FGG     | 10.698914  |
| GLYCAM1 | -4.8599806 |
| H2-AA   | -0.6046169 |
| H2-AB1  | -0.9148462 |
| H2-DMA  | -7.1505904 |
| H2-DMB1 | -2.1257384 |
| H2-DMB2 | -1.9394491 |
| H2-EB1  | -1.5659902 |
| H2-M1   | -2.947433  |
| H2-M9   | -1.637775  |
| H2-OA   | -1.0264516 |
| H2-OB   | -2.4911797 |
| H2-T18  | -2.9834757 |
| H2-T24  | -0.7686567 |
| HC      | 1.7227013  |
| ICAM2   | -1.9542243 |
| IL1B    | 2.6184552  |
| IL6     | 7.301508   |
| IRAK1   | 0.78391576 |
| IRAK4   | 0.5209422  |
| IRF3    | 1.9987185  |
| IRF7    | 2.2491696  |
| IRS1    | 0.5869281  |
| IRS2    | 3.9137294  |
| ITGA4   | -0.5322883 |
| ITGA6   | -1.2064121 |
| ITGA8   | -8.241262  |
| ITGB2L  | -2.6846042 |
| ITGB7   | -1.7952635 |
| ITGB8   | -3.4270377 |
| JAM3    | -0.4149952 |
| JUN     | 1.7830541  |
| L1CAM   | -2.659653  |
| LBP     | 4.678337   |
| LRRC4   | -3.4226708 |
| LY96    | 2.6905177  |
| MADCAM1 | -1.4309137 |
| MAP2K1  | 2.6594136  |

|          |            |
|----------|------------|
| MAP2K2   | 2.5691159  |
| MAP2K3   | 1.6721599  |
| MAP2K4   | 1.4800174  |
| MAP3K7   | 1.9393547  |
| MAP3K8   | 3.5246217  |
| MAPK14   | 0.7399318  |
| MAPK9    | 0.9235642  |
| MTOR     | 2.4041243  |
| MYD88    | 2.5263698  |
| NFKBIA   | 2.5546033  |
| NFKBIB   | 3.7119367  |
| NFKBIE   | 1.468838   |
| NLGN1    | -2.3180912 |
| NPY      | 3.8314302  |
| NRCAM    | -5.355447  |
| NRXN2    | -1.7576151 |
| NTNG1    | -4.9911966 |
| NTNG2    | -0.6750443 |
| PCK1     | 6.8706536  |
| PDCD1    | -0.7215135 |
| PECAM1   | -1.3196194 |
| PIK3CB   | 1.1492751  |
| PIK3R1   | 0.5093167  |
| PIK3R2   | 1.1095321  |
| PIK3R5   | 1.5761268  |
| PPARGC1A | 4.914756   |
| PRKAA1   | 1.036577   |
| PRKAA2   | 2.2955096  |
| PRKAB2   | 0.8194208  |
| PRKAG1   | 1.3975909  |
| PRKAG2   | 0.9413302  |
| PTPN11   | 1.483566   |
| PTPRC    | -0.5122116 |
| PTPRM    | -3.2053742 |
| PVRL3    | -1.6524374 |
| RELA     | 2.9477847  |
| RIPK1    | 2.6817415  |
| RXRA     | 2.3270087  |
| RXRB     | 2.6801684  |
| RXRG     | 0.8702009  |
| SLC2A1   | 3.5512712  |
| SOCS3    | 4.5939703  |
| SPP1     | 1.431256   |
| STAT3    | 3.1285164  |
| STK11    | 1.4644239  |

|          |            |
|----------|------------|
| TAB1     | 0.37772393 |
| TAB2     | 1.8461864  |
| TBK1     | 3.2366788  |
| THBD     | -2.5943391 |
| TICAM1   | 1.1511948  |
| TLR1     | 1.7871199  |
| TLR2     | 3.1554701  |
| TLR3     | 1.4207106  |
| TLR6     | 2.1066854  |
| TLR9     | 2.0769737  |
| TNF      | 4.244586   |
| TNFRSF1B | 1.2645538  |
| TOLLIP   | 1.6692741  |
| TRADD    | 1.9492948  |
| TRAF2    | 2.5141637  |
| TRAF3    | 1.0559762  |
| TRAF6    | 1.5576911  |
